# Supplementary material for: Deconstruction of a Metastatic Tumor Microenvironment Reveals a Common Matrix Response in Human Cancers
Source: Oxford University Press journal article supplement (doi:10.1158/2159-8290.cd-17-0284), 2017-12-01
Supplement: 21598290cd170284-sup-180566_3_supp_4416930_p04mfv.xlsx [file 21598290cd170284-sup-180566_3_supp_4416930_p04mfv.xlsx]

## Sheet: Table S10
Supplementary Table 10: Univariate correlation coefficients and pvalues of matrisome proteins versus disease score
Filtered applied to display proteins with pearson's p < 0.05
protein	pearson.pvalues	pearson.rvalues	spearman.pvalues	spearman.rvalues
S100A11	4.68795e-07	0.751358	1.09619e-05	0.684969
PLOD1	5.5085e-07	0.748388	0.000226635	0.599553
COL11A1	3.3407e-05	0.656502	3.67265e-05	0.653937
SFRP4	3.65308e-05	0.654082	0.000901299	0.550529
SPON1	3.71287e-05	0.653641	0.00105211	0.544529
COL8A1	3.95861e-05	0.65189	1.1997e-05	0.682775
SERPINH1	4.51618e-05	0.648255	0.000152821	0.622326
ANXA4	4.82952e-05	0.646386	0.000459741	0.58389
VCAN	6.82792e-05	0.636537	6.53385e-06	0.712567
HPX	6.86616e-05	0.636375	0.00141978	0.532578
PLG	9.03743e-05	0.628305	2.27819e-05	0.666627
MXRA5	0.000120949	0.619492	0.00143081	0.532263
PCOLCE	0.000177689	0.607437	0.000815019	0.554373
FBLN2	0.000230226	0.599036	6.52866e-05	0.649064
CTSB	0.000240028	0.597662	0.000241505	0.597459
CSTB	0.000351125	0.584827	0.0159758	0.41625
PLOD3	0.000393577	0.580869	0.00427831	0.484441
FN1	0.00043106	0.577678	0.00103181	0.552473
HCFC1	0.000436033	0.577273	0.00522296	0.474946
FBLN1	0.000511023	0.571619	0.00379278	0.494987
LGALS3	0.000543541	0.569393	0.00967372	0.443829
ANXA5	0.000939475	0.548931	0.00515884	0.479947
SFRP2	0.000946744	0.548633	0.01297	0.427976
S100A1	0.00110096	0.542747	0.0271781	0.384439
AEBP1	0.00185181	0.521606	0.0147408	0.420824
ANXA6	0.00203641	0.517591	0.0104022	0.443182
COMP	0.00226027	0.513128	0.0404685	0.358542
LTBP2	0.00226618	0.513016	0.00527313	0.474485
COL5A1	0.00404806	0.487027	0.000424344	0.578231
LGALS1	0.00419924	0.485315	0.00156417	0.52862
CTSD	0.00553211	0.47216	0.00895212	0.447901
GPC6	0.00860427	0.449965	0.0278405	0.382926
LMAN1	0.00935303	0.445606	0.0597226	0.331211
THBS1	0.0096791	0.443799	0.444319	0.137366
S100A4	0.0117762	0.433277	0.0225601	0.395922
F2	0.0132895	0.426628	0.00644049	0.464681
SERPINA3	0.0164889	0.414437	0.0899401	0.300134
SERPINA1	0.0186597	0.40725	0.0707377	0.318615
S100A6	0.0206244	0.401321	0.0595863	0.331378
ANXA7	0.0214214	0.39905	0.0757663	0.31337
TNC	0.0249549	0.389748	0.0376446	0.364639
ANXA1	0.0252935	0.388915	0.0132797	0.429479
EFEMP2	0.0258525	0.38756	0.0246835	0.390423
AGT	0.0287375	0.380924	0.0727853	0.316446
HRG	0.0304898	0.377155	0.029928	0.378343
MFAP2	0.0333348	0.371397	0.00459138	0.48111
THBS4	0.0795326	0.309616	0.296608	0.187299
CILP	0.0601596	0.330678	0.104914	0.287433
FGB	0.0718344	0.317447	0.104497	0.287767
CLEC3B	0.0500527	0.343883	0.0796949	0.309458
THBS2	0.130196	0.268926	0.384659	0.15643
FBLN5	0.0358309	0.366665	0.0119402	0.432523
MFAP4	0.0444512	0.352144	0.00263577	0.506439
POSTN	0.055048	0.337116	0.0910585	0.299131
ITIH2	0.0472895	0.347861	0.00378539	0.490137
SPARC	0.107259	0.285514	0.121721	0.274733
TGFBI	0.105665	0.286762	0.179247	0.239305
ANXA11	0.416886	0.146198	0.0151709	0.421791
CXCL12	0.0605104	0.330252	0.00945738	0.445022
C1QC	0.0729906	0.316231	0.0519924	0.341194
LTBP3	0.0970099	0.293799	0.00225586	0.513212
LTBP1	0.059802	0.331114	0.00716691	0.459324
CTSZ	0.133044	0.267022	0.0304	0.377344
COL12A1	0.270049	0.197719	0.525	0.114305
MMP2	0.151724	0.255221	0.0493179	0.344923
SERPINF1	0.0819919	0.307238	0.0921875	0.298128
FGA	0.185435	0.236346	0.135854	0.26504
S100A10	0.233452	0.213242	0.713036	0.0665163
VTN	0.270312	0.197613	0.0549373	0.337261
SERPING1	0.141541	0.261514	0.367533	0.162071
SRPX	0.100014	0.291305	0.0543974	0.337969
C1QB	0.136143	0.264984	0.204662	0.226649
ITIH1	0.177383	0.240617	0.130871	0.268472
COL5A3	0.344549	0.169891	0.626308	0.0879917
EFEMP1	0.645775	0.0830778	0.110018	0.283422
TGM4	0.5129	0.118057	0.529996	0.11334
PRSS1	0.228936	0.215268	0.217283	0.220623
ANXA2	0.301661	0.185385	0.72613	0.0631684
F13A1	0.322104	0.17784	0.52401	0.114983
FGG	0.366624	0.162374	0.424456	0.143382
SPP1	0.400946	0.1512	0.118338	0.277202
BGN	0.454164	0.1349	0.597985	0.0949198
ANXA2P2	0.578306	0.100389	0.860681	-0.0317513
COL4A5	0.870001	0.0296253	0.898828	0.0230172
WISP2	0.434804	0.140701	0.164051	0.248001
MUC16	0.407569	0.149108	0.337736	0.17227
COL5A2	0.523719	0.115063	0.72613	0.0631684
SERPINB1	0.808044	-0.0439671	0.762538	-0.0546659
FMOD	0.634044	0.0860318	0.425855	0.14343
LTBP4	0.546233	0.108928	0.406329	0.149498
S100A13	0.940004	0.0136267	0.595286	-0.0959545
PODN	0.483007	0.126497	0.795023	0.0470119
COL14A1	0.408909	0.148687	0.0817161	0.307821
ITIH4	0.830517	0.038739	0.959967	0.00908808
AMBP	0.580786	0.0997377	0.29504	0.187897
COL4A1	0.883158	-0.0266051	0.671109	0.0767687
NPNT	0.859948	0.031938	0.793808	-0.0472967
TGM2	0.678103	-0.0750431	0.799835	-0.0457888
A2M	0.611577	-0.0917516	0.886915	0.0257439
ELN	0.804108	0.0448862	0.654268	0.0809523
EMILIN1	0.923028	0.0174926	0.486709	0.125
COL2A1	0.823469	0.0403753	0.134103	0.266321
COL3A1	0.744038	-0.059066	0.111761	0.282086
COL1A2	0.81103	0.0432705	0.449926	0.135695
ADAMTS16	0.593064	-0.0965317	0.811274	0.0432136
MFAP5	0.451863	-0.135582	0.233903	-0.213041
FBN3	0.538783	-0.110944	0.414049	-0.14708
COL18A1	0.842395	-0.0359884	0.0577414	-0.333668
LUM	0.804609	-0.0447692	0.175446	-0.241665
COL6A1	0.642189	-0.0839785	0.0852165	-0.304479
PRELP	0.495728	-0.122874	0.103667	-0.288436
MMRN1	0.301338	-0.185506	0.345747	-0.169476
EMILIN2	0.472455	-0.12954	0.272973	-0.19654
PZP	0.361057	-0.164244	0.229824	-0.214867
AGRN	0.251579	-0.205366	0.0511487	-0.342354
DPT	0.510403	-0.118752	0.862165	0.0314276
DCN	0.325439	-0.176638	0.131839	-0.267714
MUC2	0.120618	-0.275565	0.0169939	-0.412698
NID1	0.298818	-0.186459	0.0444573	-0.352135
COL6A2	0.164072	-0.247989	0.00658235	-0.46758
LAMB2	0.060354	-0.330442	0.0139134	-0.426805
S100A9	0.0497918	-0.344251	0.146825	-0.258021
OGN	0.144613	-0.259582	0.0451609	-0.351053
FBN2	0.088442	-0.301253	0.0356523	-0.368316
ASPN	0.0787856	-0.31035	0.0132022	-0.429813
MMRN2	0.0569063	-0.334723	0.0289488	-0.380459
VWF	0.0385989	-0.361721	0.000283359	-0.592128
FBN1	0.0382591	-0.362313	0.0232381	-0.396056
MMP9	0.0357597	-0.366797	0.00916344	-0.446681
NID2	0.0336874	-0.370712	0.0144054	-0.424799
COL6A3	0.0751718	-0.313976	0.00293796	-0.507019
S100A8	0.0570498	-0.334541	0.0838026	-0.305816
LAMA4	0.0261561	-0.386833	0.0083318	-0.455214
ELANE	0.0230376	-0.394649	0.087702	-0.301922
COL15A1	0.0206176	-0.401341	0.00053881	-0.569709
COL1A1	0.0168199	-0.413292	0.174936	-0.241644
LAMA5	0.0157374	-0.41711	0.00444553	-0.487299
COL6A6	0.0156222	-0.417529	0.0111599	-0.436193
LAMB1	0.00735654	-0.458003	0.0075317	-0.460561
HSPG2	0.0055305	-0.472174	0.000146712	-0.623663
TNXB	0.00203343	-0.517654	0.00237669	-0.516711
CTSG	0.00190358	-0.520446	0.00162642	-0.533422
COL4A2	0.00107965	-0.543515	6.17528e-05	-0.650735
ABI3BP	0.000200256	-0.603589	0.000118084	-0.630682
LAMC1	1.31818e-05	-0.680465	2.52404e-05	-0.676471

## Sheet: Table S11
Supplementary Table 11: Loading weight matrix of the first latent variable from PLS regression on matrisome proteins vs disease score . Univariate correlation coefficients and pvalues are included.
Filtered applied to display top 60 proteins (loading weight >|0.08|)
PLS model weights		univariate correlations
protein	loading.weight	pearson.pvalue	pearson.rvalue	spearman.pvalue	spearman.rvalue
PLOD1	0.156499	5.5085e-07	0.748388	0.000226635	0.599553
S100A11	0.153558	4.68795e-07	0.751358	1.09619e-05	0.684969
SFRP4	0.136449	3.65308e-05	0.654082	0.000901299	0.550529
ANXA4	0.134282	4.82952e-05	0.646386	0.000459741	0.58389
MXRA5	0.13321	0.000120949	0.619492	0.00143081	0.532263
SERPINH1	0.133059	4.51618e-05	0.648255	0.000152821	0.622326
SPON1	0.132674	3.71287e-05	0.653641	0.00105211	0.544529
HPX	0.132629	6.86616e-05	0.636375	0.00141978	0.532578
VCAN	0.130541	6.82792e-05	0.636537	6.53385e-06	0.712567
HCFC1	0.128654	0.000436033	0.577273	0.00522296	0.474946
COL11A1	0.127108	3.3407e-05	0.656502	3.67265e-05	0.653937
PLOD3	0.126707	0.000393577	0.580869	0.00427831	0.484441
LGALS3	0.125757	0.000543541	0.569393	0.00967372	0.443829
CTSB	0.125557	0.000240028	0.597662	0.000241505	0.597459
S100A1	0.125269	0.00110096	0.542747	0.0271781	0.384439
CSTB	0.123343	0.000351125	0.584827	0.0159758	0.41625
PLG	0.122241	9.03743e-05	0.628305	2.27819e-05	0.666627
COL8A1	0.121789	3.95861e-05	0.65189	1.1997e-05	0.682775
FN1	0.119259	0.00043106	0.577678	0.00103181	0.552473
FBLN2	0.117979	0.000230226	0.599036	6.52866e-05	0.649064
SFRP2	0.117858	0.000946744	0.548633	0.01297	0.427976
FBLN1	0.117725	0.000511023	0.571619	0.00379278	0.494987
PCOLCE	0.115896	0.000177689	0.607437	0.000815019	0.554373
ANXA5	0.114567	0.000939475	0.548931	0.00515884	0.479947
COMP	0.112805	0.00226027	0.513128	0.0404685	0.358542
LMAN1	0.112194	0.00935303	0.445606	0.0597226	0.331211
ANXA6	0.111544	0.00203641	0.517591	0.0104022	0.443182
LTBP2	0.109914	0.00226618	0.513016	0.00527313	0.474485
AEBP1	0.105857	0.00185181	0.521606	0.0147408	0.420824
LGALS1	0.101684	0.00419924	0.485315	0.00156417	0.52862
THBS1	0.0988571	0.0096791	0.443799	0.444319	0.137366
CTSD	0.0962626	0.00553211	0.47216	0.00895212	0.447901
ANXA7	0.0945931	0.0214214	0.39905	0.0757663	0.31337
AGT	0.0942159	0.0287375	0.380924	0.0727853	0.316446
SERPINA3	0.0916169	0.0164889	0.414437	0.0899401	0.300134
GPC6	0.0905386	0.00860427	0.449965	0.0278405	0.382926
S100A4	0.0887613	0.0117762	0.433277	0.0225601	0.395922
COL5A1	0.0878605	0.00404806	0.487027	0.000424344	0.578231
SERPINA1	0.0870768	0.0186597	0.40725	0.0707377	0.318615
HRG	0.0857828	0.0304898	0.377155	0.029928	0.378343
S100A6	0.0857724	0.0206244	0.401321	0.0595863	0.331378
F2	0.0846477	0.0132895	0.426628	0.00644049	0.464681
TNC	0.0838374	0.0249549	0.389748	0.0376446	0.364639
ANXA1	0.083188	0.0252935	0.388915	0.0132797	0.429479
EFEMP2	0.0816795	0.0258525	0.38756	0.0246835	0.390423
MFAP2	0.0708457	0.0333348	0.371397	0.00459138	0.48111
THBS4	0.0700448	0.0795326	0.309616	0.296608	0.187299
CILP	0.0692093	0.0601596	0.330678	0.104914	0.287433
FGB	0.0660373	0.0718344	0.317447	0.104497	0.287767
CLEC3B	0.0657382	0.0500527	0.343883	0.0796949	0.309458
THBS2	0.0647951	0.130196	0.268926	0.384659	0.15643
ITIH2	0.0645266	0.0472895	0.347861	0.00378539	0.490137
MFAP4	0.0644011	0.0444512	0.352144	0.00263577	0.506439
POSTN	0.0640169	0.055048	0.337116	0.0910585	0.299131
FBLN5	0.0638461	0.0358309	0.366665	0.0119402	0.432523
SPARC	0.0627608	0.107259	0.285514	0.121721	0.274733
TGFBI	0.0598368	0.105665	0.286762	0.179247	0.239305
ANXA11	0.0593781	0.416886	0.146198	0.0151709	0.421791
CXCL12	0.0574728	0.0605104	0.330252	0.00945738	0.445022
C1QC	0.0571355	0.0729906	0.316231	0.0519924	0.341194
LTBP3	0.0566588	0.0970099	0.293799	0.00225586	0.513212
LTBP1	0.0556957	0.059802	0.331114	0.00716691	0.459324
CTSZ	0.054071	0.133044	0.267022	0.0304	0.377344
COL12A1	0.053402	0.270049	0.197719	0.525	0.114305
MMP2	0.0533582	0.151724	0.255221	0.0493179	0.344923
SERPINF1	0.0476341	0.0819919	0.307238	0.0921875	0.298128
FGA	0.0474815	0.185435	0.236346	0.135854	0.26504
S100A10	0.0455499	0.233452	0.213242	0.713036	0.0665163
VTN	0.0450386	0.270312	0.197613	0.0549373	0.337261
SERPING1	0.0440751	0.141541	0.261514	0.367533	0.162071
SRPX	0.0438586	0.100014	0.291305	0.0543974	0.337969
C1QB	0.0421976	0.136143	0.264984	0.204662	0.226649
ITIH1	0.0419316	0.177383	0.240617	0.130871	0.268472
COL5A3	0.0394918	0.344549	0.169891	0.626308	0.0879917
EFEMP1	0.0372005	0.645775	0.0830778	0.110018	0.283422
TGM4	0.0370222	0.5129	0.118057	0.529996	0.11334
PRSS1	0.0356168	0.228936	0.215268	0.217283	0.220623
ANXA2	0.0319037	0.301661	0.185385	0.72613	0.0631684
F13A1	0.0306836	0.322104	0.17784	0.52401	0.114983
FGG	0.0292255	0.366624	0.162374	0.424456	0.143382
SPP1	0.0283036	0.400946	0.1512	0.118338	0.277202
BGN	0.0227814	0.454164	0.1349	0.597985	0.0949198
ANXA2P2	0.0178988	0.578306	0.100389	0.860681	-0.0317513
COL4A5	0.0164486	0.870001	0.0296253	0.898828	0.0230172
WISP2	0.0132542	0.434804	0.140701	0.164051	0.248001
MUC16	0.013125	0.407569	0.149108	0.337736	0.17227
COL5A2	0.0108589	0.523719	0.115063	0.72613	0.0631684
SERPINB1	0.0105565	0.808044	-0.0439671	0.762538	-0.0546659
FMOD	0.00948915	0.634044	0.0860318	0.425855	0.14343
LTBP4	0.00719214	0.546233	0.108928	0.406329	0.149498
S100A13	0.00668422	0.940004	0.0136267	0.595286	-0.0959545
PODN	0.00659655	0.483007	0.126497	0.795023	0.0470119
COL14A1	0.0049467	0.408909	0.148687	0.0817161	0.307821
ITIH4	0.00475205	0.830517	0.038739	0.959967	0.00908808
AMBP	0.00473316	0.580786	0.0997377	0.29504	0.187897
COL4A1	-0.000144501	0.883158	-0.0266051	0.671109	0.0767687
NPNT	-0.00197012	0.859948	0.031938	0.793808	-0.0472967
TGM2	-0.00322269	0.678103	-0.0750431	0.799835	-0.0457888
A2M	-0.00356693	0.611577	-0.0917516	0.886915	0.0257439
ELN	-0.00369385	0.804108	0.0448862	0.654268	0.0809523
EMILIN1	-0.00710141	0.923028	0.0174926	0.486709	0.125
COL2A1	-0.0081022	0.823469	0.0403753	0.134103	0.266321
COL3A1	-0.00850561	0.744038	-0.059066	0.111761	0.282086
COL1A2	-0.0144552	0.81103	0.0432705	0.449926	0.135695
ADAMTS16	-0.0145767	0.593064	-0.0965317	0.811274	0.0432136
MFAP5	-0.0172373	0.451863	-0.135582	0.233903	-0.213041
FBN3	-0.0173144	0.538783	-0.110944	0.414049	-0.14708
COL18A1	-0.0190014	0.842395	-0.0359884	0.0577414	-0.333668
LUM	-0.0218682	0.804609	-0.0447692	0.175446	-0.241665
COL6A1	-0.0297166	0.642189	-0.0839785	0.0852165	-0.304479
PRELP	-0.0317159	0.495728	-0.122874	0.103667	-0.288436
MMRN1	-0.0339923	0.301338	-0.185506	0.345747	-0.169476
EMILIN2	-0.0387493	0.472455	-0.12954	0.272973	-0.19654
PZP	-0.0410768	0.361057	-0.164244	0.229824	-0.214867
AGRN	-0.0437603	0.251579	-0.205366	0.0511487	-0.342354
DPT	-0.0455521	0.510403	-0.118752	0.862165	0.0314276
DCN	-0.0523467	0.325439	-0.176638	0.131839	-0.267714
MUC2	-0.053318	0.120618	-0.275565	0.0169939	-0.412698
NID1	-0.0552713	0.298818	-0.186459	0.0444573	-0.352135
COL6A2	-0.0636161	0.164072	-0.247989	0.00658235	-0.46758
LAMB2	-0.0660436	0.060354	-0.330442	0.0139134	-0.426805
S100A9	-0.0684714	0.0497918	-0.344251	0.146825	-0.258021
OGN	-0.0697917	0.144613	-0.259582	0.0451609	-0.351053
FBN2	-0.0722782	0.088442	-0.301253	0.0356523	-0.368316
ASPN	-0.0732917	0.0787856	-0.31035	0.0132022	-0.429813
MMRN2	-0.0747218	0.0569063	-0.334723	0.0289488	-0.380459
MMP9	-0.0750494	0.0357597	-0.366797	0.00916344	-0.446681
ELANE	-0.0777873	0.0230376	-0.394649	0.087702	-0.301922
NID2	-0.0785392	0.0336874	-0.370712	0.0144054	-0.424799
FBN1	-0.0797397	0.0382591	-0.362313	0.0232381	-0.396056
COL6A3	-0.080578	0.0751718	-0.313976	0.00293796	-0.507019
S100A8	-0.08381	0.0570498	-0.334541	0.0838026	-0.305816
VWF	-0.0847222	0.0385989	-0.361721	0.000283359	-0.592128
LAMA4	-0.0873929	0.0261561	-0.386833	0.0083318	-0.455214
COL6A6	-0.0880782	0.0156222	-0.417529	0.0111599	-0.436193
LAMA5	-0.0881866	0.0157374	-0.41711	0.00444553	-0.487299
COL15A1	-0.0906496	0.0206176	-0.401341	0.00053881	-0.569709
LAMB1	-0.097688	0.00735654	-0.458003	0.0075317	-0.460561
COL1A1	-0.0978633	0.0168199	-0.413292	0.174936	-0.241644
HSPG2	-0.0989849	0.0055305	-0.472174	0.000146712	-0.623663
CTSG	-0.109333	0.00190358	-0.520446	0.00162642	-0.533422
TNXB	-0.110512	0.00203343	-0.517654	0.00237669	-0.516711
COL4A2	-0.113023	0.00107965	-0.543515	6.17528e-05	-0.650735
ABI3BP	-0.130313	0.000200256	-0.603589	0.000118084	-0.630682
LAMC1	-0.139416	1.31818e-05	-0.680465	2.52404e-05	-0.676471

## Sheet: Table S12
Supplementary Table 12: Loading weight matrix of the first latent variable from PLS regression on matrisome genes vs disease score . Univariate correlation coefficients and pvalues are included.
Filtered applied to display top 412 genes (loading weight >|0.03|)
PLS model weights		univariate correlations
genes	loading.weights	pearson.pvalues	pearson.rvalues	spearman.pvalues	spearman.rvalues
ST14	0.0569069	1.11e-09	0.824804	4.62e-06	0.705322
MDK	0.0541934	9.34e-08	0.763917	1.82e-06	0.730532
MMP7	0.0532319	5.69e-08	0.771796	1.17e-05	0.681232
HAPLN1	0.0527237	4.98e-07	0.7349	0.000100552	0.609855
COL10A1	0.0520466	1.93e-07	0.751802	4.72e-07	0.780672
ADAM28	0.0519248	1.26e-07	0.758944	5.51e-07	0.773389
COL11A1	0.0515686	1.25e-07	0.759134	1.7e-05	0.671148
MMP11	0.0514355	8.48e-07	0.724835	0.000228011	0.593277
SDC1	0.050346	1.32e-06	0.716095	5.07e-05	0.640616
COL22A1	0.049825	8.52e-07	0.724733	2.78e-06	0.718768
VWDE	0.0488633	2.36e-06	0.704171	0.000471944	0.559745
SERPINB5	0.0488352	6.18e-06	0.682937	0.00013623	0.600643
S100A14	0.04805	1.1e-05	0.669251	0.0060558	0.458543
PODNL1	0.0478775	1.03e-06	0.721052	6.39e-06	0.696919
CTSV	0.0477152	1.46e-05	0.662372	4.35e-05	0.645098
F12	0.0476446	2.59e-05	0.647809	0.0396711	0.35042
RSPO4	0.0475651	1.19e-05	0.667353	0.00426553	0.47563
MFAP2	0.0475199	4.92e-06	0.688103	9.62e-06	0.686275
CLEC18B	0.0474365	2.27e-05	0.65126	0.000386912	0.566657
LTA	0.0469116	1.46e-05	0.662419	0.000301628	0.57511
CTHRC1	0.0459131	4.66e-06	0.689326	2.36e-06	0.723249
MMP13	0.045809	2.79e-05	0.645796	0.00033307	0.571771
COL9A2	0.0456018	1.73e-05	0.658208	1.19e-05	0.680672
WNT7A	0.0454241	4.06e-05	0.635794	0.00240029	0.496775
EPYC	0.0452939	5.02e-06	0.687647	1.13e-05	0.682073
MUC1	0.0451587	8.34e-05	0.615384	0.00372154	0.482073
WNT10A	0.0450853	6.96e-05	0.62063	0.00612411	0.457983
COL13A1	0.0442948	3e-05	0.643918	3.98e-06	0.709244
FBN3	0.0442858	0.000100025	0.610012	0.00313459	0.485188
IGFBP2	0.0438517	0.000103194	0.609079	0.000448506	0.569468
COMP	0.0437663	5.94e-05	0.625185	0.00011922	0.614566
LAMB3	0.0436196	0.0004341	0.562671	0.0551412	0.327731
HAPLN4	0.0435695	5.71e-05	0.626298	0.00137025	0.519874
PRSS1	0.0435585	0.000140778	0.599629	0.000516722	0.55654
CLEC5A	0.0434008	0.000127451	0.602688	0.000387189	0.57479
CST1	0.0429346	0.000198263	0.588854	1.55e-05	0.660901
ADAMDEC1	0.0429275	2.61e-05	0.647552	6.74e-06	0.695518
LTB	0.0429046	0.000102676	0.60923	0.000469591	0.567787
INHBA	0.0428115	9.46e-05	0.611671	2.96e-05	0.656022
SPOCK2	0.0425643	0.000247433	0.581674	0.00251322	0.5
SPP1	0.0421803	9.49e-05	0.611577	8.83e-06	0.688515
EMID1	0.0412361	0.000925537	0.535129	0.015806	0.407283
IMPG2	0.0409334	3.43e-05	0.640298	1.4e-05	0.676471
MUC15	0.0408755	0.000176306	0.592591	5.4e-05	0.627844
MUC5B	0.0407108	0.000787099	0.541225	0.00302194	0.486801
LOXL1	0.0404898	0.000139682	0.599871	6.92e-05	0.631373
COL8A2	0.0403187	0.000101932	0.609448	2.11e-06	0.726331
WISP3	0.0402896	0.00050409	0.557419	0.0126508	0.417204
LAMC2	0.0401604	0.000739707	0.543531	0.0140409	0.414006
PRSS3	0.0401359	0.000560201	0.553657	0.000398104	0.565674
C1QTNF6	0.039845	0.000118888	0.604809	5.53e-05	0.638095
GDF1	0.0397806	0.000315768	0.573572	0.000262911	0.579678
CILP2	0.0396956	0.000101952	0.609442	6.8e-05	0.631933
CLEC18A	0.0396159	0.0014719	0.517013	0.0491247	0.335854
MMP9	0.0395811	0.000130571	0.601947	9.2e-05	0.622689
CLEC18C	0.0395005	0.000714798	0.544797	0.00521958	0.461881
FNDC1	0.0393648	0.000280691	0.57751	0.000121339	0.614006
PLXNB2	0.0392508	0.00183021	0.508149	0.0305333	0.367507
LOXL4	0.0390933	0.00100566	0.53196	0.0219584	0.387955
CXCL10	0.0388848	0.0017345	0.510356	0.00281214	0.494958
ESM1	0.0388172	0.000945779	0.534306	0.00188445	0.512605
CXCL11	0.0383776	0.000754442	0.542801	0.011412	0.42549
MMP1	0.0380397	0.00253711	0.494401	0.0330772	0.36109
FN1	0.0378959	0.000429715	0.563025	8.56e-05	0.62493
S100A2	0.0376652	0.00191071	0.506369	0.0218566	0.388235
BGN	0.0374533	0.000320913	0.573028	0.000132455	0.611204
COL23A1	0.0372693	0.00158826	0.513945	0.00695888	0.451541
FBN2	0.0364798	0.000943558	0.534396	0.0010052	0.538655
SEMA7A	0.0361236	0.00217649	0.500925	0.00201073	0.509804
WNT6	0.035513	0.00309453	0.485756	0.0679132	0.312605
CTSB	0.0354016	0.00211876	0.502056	0.00801905	0.444258
COL6A5	0.0353939	0.000688381	0.546182	0.000277915	0.577841
MUC20	0.0351536	0.00532625	0.460922	0.0154235	0.408683
VWA2	0.0351525	0.00293122	0.488138	0.0024353	0.501401
LGALS9	0.0350256	0.0026323	0.492814	0.00823812	0.442857
ADAM8	0.0346348	0.00581978	0.456692	0.0536374	0.329692
SPOCK3	0.0344685	0.00531092	0.461059	0.00372809	0.477441
NRTN	0.0344402	0.00244318	0.496018	0.00286487	0.494118
IL23A	0.0343245	0.0122646	0.418871	0.0759617	0.304202
ADAMTS14	0.0340352	0.00180224	0.508783	0.000102505	0.619328
VWA7	0.0338874	0.00217262	0.501	0.0128944	0.418768
VCAN	0.0338339	0.00155288	0.514856	0.000286488	0.585434
MMP14	0.0334416	0.00276979	0.490609	0.000897869	0.543137
NTN5	0.0328609	0.00679896	0.449139	0.0212545	0.389916
TLL2	0.0326763	0.00253635	0.494414	0.00137966	0.52577
THSD4	0.0322547	0.0146396	0.409244	0.141911	0.253221
OGFOD2	0.0321279	0.0120384	0.419868	0.239021	0.203922
EGLN3	0.0320802	0.0179235	0.3979	0.050526	0.333894
ELFN2	0.0320089	0.00265376	0.492464	0.00279475	0.495238
GPC2	0.031931	0.00426056	0.471353	0.012446	0.420728
GDNF	0.0319216	0.00686334	0.448676	0.0198098	0.394118
WNT7B	0.0319023	0.0177003	0.398613	0.557561	0.102241
SEMA4B	0.0314293	0.0290552	0.369212	0.0324592	0.363585
AGRN	0.0313585	0.0188467	0.395026	0.0817315	0.298599
TNFSF4	0.0309443	0.00945265	0.432561	0.00916661	0.437255
NRG3	0.0308827	0.0144111	0.410111	0.138327	0.255462
C1QL4	0.0304309	0.0347996	0.357856	0.497282	0.118636
COL1A1	0.0301211	0.00318	0.484552	0.000102505	0.619328
FST	-0.0301187	0.00677821	-0.449289	0.0200919	-0.393277
ADAM15	-0.0301308	0.00198677	-0.504747	0.00241997	-0.501681
PLXDC1	-0.0302527	0.0266813	-0.37445	0.540327	-0.106723
NELL1	-0.0304187	0.0170089	-0.400872	0.0493229	-0.335574
S100A9	-0.030731	0.00634868	-0.452488	0.0192555	-0.395798
ADAM22	-0.0309028	0.0177866	-0.398336	0.516014	-0.113165
IL24	-0.0315895	0.00393184	-0.475028	0.00908934	-0.434576
ISM2	-0.0315967	0.0168353	-0.401451	0.013379	-0.414175
SERPINF1	-0.0316727	0.00336876	-0.481991	0.0266035	-0.37619
EDA	-0.0316926	0.00719774	-0.446328	0.0569012	-0.32549
SEMA5A	-0.031771	0.021673	-0.386902	0.181065	-0.231092
MFAP5	-0.032545	0.00310081	-0.485666	0.00465647	-0.471429
SPOCK1	-0.0326504	0.00896318	-0.435291	0.131362	-0.259944
POMZP3	-0.0328963	0.00195939	-0.505324	0.00883192	-0.439216
THPO	-0.032912	0.00142503	-0.51831	0.000445075	-0.569748
PZP	-0.0329269	0.00321561	-0.484059	0.0239481	-0.380979
LAMB4	-0.0329403	0.00480076	-0.465816	0.0188932	-0.396919
ITIH4	-0.0330987	0.00730929	-0.445566	0.168432	-0.237815
ANXA7	-0.033132	0.00281179	-0.489954	0.00260961	-0.498319
S100P	-0.033148	0.00220742	-0.50033	0.00763735	-0.446779
NDNF	-0.0331821	0.00471871	-0.466621	0.0012804	-0.528852
WNT5A	-0.0332429	0.00532065	-0.460972	0.0337494	-0.361064
NELL2	-0.0332556	0.00973048	-0.431065	0.014975	-0.410364
ADAMTSL5	-0.0332628	0.00295153	-0.487835	0.00828254	-0.442577
HMCN2	-0.0332677	0.00719079	-0.446376	0.284268	-0.185714
CLEC4D	-0.0337078	0.00516134	-0.462411	0.013223	-0.417367
SERPINB10	-0.033769	0.000663838	-0.547512	8.36e-05	-0.615303
CHADL	-0.0338137	0.0013568	-0.520266	0.00084207	-0.545658
CLEC4E	-0.0339211	0.00327121	-0.483298	0.00534678	-0.464706
GPC6	-0.0341863	0.00589843	-0.456047	0.155964	-0.244818
IL10	-0.0343692	0.0027804	-0.490443	0.0121958	-0.421849
EGFL8	-0.0343978	0.00140038	-0.519007	0.014975	-0.410364
IL7	-0.0343983	0.00893648	-0.435443	0.124253	-0.264706
SMOC2	-0.0344536	0.00156089	-0.514648	0.0425824	-0.345658
WFIKKN2	-0.0346021	0.00454022	-0.468415	0.0834695	-0.296722
C1QTNF9B	-0.0347634	0.00527319	-0.461397	0.0141249	-0.411212
CST3	-0.0349286	0.00109136	-0.528808	0.00457588	-0.472269
MST1	-0.034933	0.00171768	-0.510755	0.0126365	-0.419888
COL4A6	-0.0349831	0.00943944	-0.432633	0.476078	-0.12409
CRELD1	-0.0350254	0.000576318	-0.552638	9.54e-05	-0.621569
PDGFD	-0.0351421	0.00835268	-0.438879	0.252387	-0.198319
IGFBP4	-0.0352857	0.00191674	-0.506238	0.234459	-0.205882
LGI2	-0.0353746	0.00389174	-0.475494	0.00911814	-0.437535
VEGFB	-0.03539	0.000792043	-0.540992	6.99e-05	-0.631092
CSTA	-0.0354523	0.002123	-0.501972	0.033604	-0.361345
SEMA6D	-0.0354592	0.00441552	-0.469705	0.0065846	-0.454342
GDF7	-0.035545	0.0122364	-0.418994	0.301537	-0.179272
MMP24	-0.0356211	0.00135286	-0.520382	0.00126305	-0.529412
OMD	-0.0356839	0.00486219	-0.46522	0.405032	-0.144818
IGF1	-0.0357329	0.00700316	-0.447683	0.0718485	-0.308403
ANXA8L1	-0.0357543	0.00136696	-0.51997	0.00162452	-0.513029
PDGFB	-0.0357673	0.00103815	-0.530738	0.00104828	-0.536975
WIF1	-0.0358098	0.00290616	-0.488514	0.00265141	-0.492502
TIMP2	-0.0358696	0.00322002	-0.483998	0.108671	-0.27591
FSTL3	-0.0359879	0.00129021	-0.522261	0.0056596	-0.461905
IL17D	-0.0360915	0.0033981	-0.481604	0.033604	-0.361345
IGFBP7	-0.0363066	0.00326189	-0.483425	0.381606	-0.152101
FRAS1	-0.0363857	0.00397161	-0.474569	0.00855344	-0.440896
FMOD	-0.0364252	0.000381859	-0.567109	0.00205003	-0.508964
MATN4	-0.0364793	0.000583865	-0.55217	0.000963688	-0.540336
LGALS3	-0.0364834	0.00128653	-0.522373	0.002545	-0.49944
THBS1	-0.0365525	0.00100281	-0.532069	0.0060558	-0.458543
EMILIN2	-0.0365643	0.00307768	-0.485996	0.0214537	-0.389356
COL28A1	-0.0365869	0.000960758	-0.533707	0.00602189	-0.458824
COL27A1	-0.036588	0.00544977	-0.459833	0.300009	-0.179832
SEMA3D	-0.0367107	0.00520303	-0.462031	0.0949603	-0.286835
WNT10B	-0.0367669	0.00163248	-0.51283	0.00222827	-0.505322
PAPPA2	-0.0367844	0.00539591	-0.460305	0.0475619	-0.338095
SEMA3C	-0.0368366	0.00554583	-0.459	0.151645	-0.247339
TECTA	-0.0368548	0.000810147	-0.540147	0.0118891	-0.423249
CTSL	-0.0368675	0.00127532	-0.522719	0.000718401	-0.551821
SERPINB9	-0.0368918	0.0027866	-0.490346	0.00582187	-0.460504
CLEC10A	-0.0369028	0.00373197	-0.477394	0.0503238	-0.334174
IL13	-0.0371299	0.000855508	-0.538104	0.00310435	-0.485616
SERPINB6	-0.0372845	0.000470931	-0.55982	3.34e-05	-0.652661
CYR61	-0.0373142	0.000672985	-0.547011	0.0239678	-0.382633
ADAMTSL1	-0.0379386	0.00180269	-0.508773	0.205963	-0.218768
NID2	-0.0380556	0.00296424	-0.487647	0.0383586	-0.352661
COLEC12	-0.0380635	0.00154268	-0.515123	0.0748471	-0.305322
SERPINB8	-0.0380726	0.000924771	-0.53516	0.00177681	-0.515126
MGP	-0.0381358	0.00145222	-0.517553	0.50355	-0.116527
CLEC4M	-0.0384677	0.00110669	-0.528267	0.00403536	-0.473843
WISP2	-0.0387363	0.000419696	-0.563845	0.0289587	-0.370868
HMCN1	-0.0387455	0.00204192	-0.503604	0.16286	-0.240896
TCHH	-0.038786	0.000549768	-0.55433	7.25e-05	-0.629972
TNFSF12	-0.0389844	0.000378101	-0.567448	0.00449651	-0.473109
INHBB	-0.0392352	0.000183641	-0.591298	0.00186004	-0.513165
S100A12	-0.0392444	0.000707374	-0.545181	0.00295468	-0.492717
EPGN	-0.039258	0.00102683	-0.53116	0.00296951	-0.487569
SERPING1	-0.0395503	0.000155046	-0.59663	0.000270734	-0.587395
CFC1	-0.0395508	0.000506781	-0.55723	3.27e-06	-0.697159
IL1A	-0.0397465	0.000212839	-0.586573	0.000109535	-0.607288
WNT9A	-0.0399855	0.000378316	-0.567429	0.00692064	-0.451821
CX3CL1	-0.0400251	0.000125286	-0.603212	5.58e-05	-0.637815
FCN1	-0.0402525	0.000478075	-0.559291	0.000588828	-0.559384
ANXA3	-0.0404372	8.6e-05	-0.614502	1.4e-05	-0.676471
ANGPT4	-0.0404455	0.000514658	-0.556683	0.0210569	-0.390476
HPSE2	-0.0405239	0.00188246	-0.506986	0.0212272	-0.388122
SEMA6C	-0.0405456	0.000176528	-0.592551	0.00150568	-0.522129
ZFP91	-0.0405768	0.000240611	-0.582589	0.00392674	-0.479552
AREG	-0.0405799	0.000123456	-0.603661	0.000295854	-0.584314
DCN	-0.040619	0.000522111	-0.556171	0.107566	-0.276751
PRELP	-0.0406504	8.33e-05	-0.615426	0.00133373	-0.527171
CTSO	-0.0408254	0.00120639	-0.524904	0.445543	-0.132773
ADAMTS3	-0.0410097	0.000324186	-0.572685	0.00537737	-0.464426
NTNG1	-0.0411561	0.000180362	-0.59187	0.00184795	-0.513445
CBLN2	-0.0411675	0.000392537	-0.56616	0.000524836	-0.555986
SERPINB2	-0.0415714	7.4e-05	-0.618865	0.000193042	-0.59888
PAMR1	-0.0416873	0.000421042	-0.563734	0.015806	-0.407283
GDF5	-0.0419252	7.23e-05	-0.61954	5.53e-05	-0.638095
FBLN7	-0.0419604	0.000556347	-0.553904	0.16286	-0.240896
MEGF8	-0.0419933	6.03e-05	-0.62474	0.000530194	-0.563305
HYAL2	-0.0420563	0.000205555	-0.587695	0.00416623	-0.476751
ADAMTS4	-0.0421523	0.00011309	-0.606324	0.00171938	-0.516527
CSF1	-0.0421986	5.04e-05	-0.629787	1.74e-05	-0.670588
CNTF	-0.0422254	0.000161064	-0.595439	0.00404494	-0.478151
FCN3	-0.0422375	2.93e-05	-0.64451	4.48e-06	-0.706162
HAPLN2	-0.0422673	0.00039894	-0.565601	0.00331882	-0.487395
COL4A2	-0.0424136	6.22e-05	-0.623857	3.47e-05	-0.651541
FGF1	-0.0424368	9.19e-05	-0.612531	4.56e-05	-0.643697
EGFL7	-0.042464	9.4e-05	-0.611877	0.000991189	-0.539216
CCL23	-0.0424829	0.000370293	-0.568164	0.132648	-0.259104
PLXNB3	-0.042753	2.56e-05	-0.648044	2.21e-05	-0.664146
ADAMTS18	-0.0428265	0.000112037	-0.606607	1.47e-05	-0.67507
MFAP4	-0.0428854	0.000122008	-0.604021	0.110908	-0.27423
CXCL12	-0.0429026	0.000240555	-0.582597	0.00547006	-0.463585
IGSF10	-0.0429104	5.74e-05	-0.626168	0.00188445	-0.512605
ADAMTS9	-0.0430224	0.000214114	-0.58638	0.0193469	-0.395518
FGF7	-0.0430972	0.000121545	-0.604136	0.0253144	-0.379272
DHH	-0.0432423	0.000123596	-0.603626	0.0445572	-0.342577
MMP25	-0.0432865	8.31e-05	-0.615507	0.000129028	-0.612045
HHIP	-0.043387	2.76e-05	-0.64615	9.2e-05	-0.622689
COL21A1	-0.0433916	0.000237416	-0.583026	0.415187	-0.141737
S100A8	-0.043434	6.24e-05	-0.623771	0.000692652	-0.553221
EREG	-0.0435026	0.000105766	-0.608341	0.00171938	-0.516527
BRINP2	-0.0435644	0.000243731	-0.582168	0.00206329	-0.508683
RSPO3	-0.0435905	0.000124359	-0.603439	0.00598814	-0.459104
IGF2	-0.0439152	1.61e-05	-0.659963	0.0127006	-0.419608
PLXND1	-0.043979	3.87e-05	-0.637103	0.00188445	-0.512605
MMP19	-0.044035	0.000100215	-0.609956	0.00350457	-0.484874
WNT9B	-0.044041	0.00010915	-0.607394	0.0009705	-0.540056
ELFN1	-0.044083	7.38e-05	-0.618953	0.00257712	-0.49888
TLL1	-0.0440832	0.00017939	-0.592042	0.0204734	-0.392157
TIMP3	-0.0441455	1.69e-05	-0.658786	0.000239555	-0.591597
F13A1	-0.044587	4.02e-05	-0.636069	0.000305492	-0.583193
MFAP3	-0.0446244	5.42e-05	-0.627775	0.00145606	-0.523529
SMOC1	-0.0446273	7.17e-05	-0.619775	0.00335933	-0.486835
MMP17	-0.0446854	1.83e-05	-0.656672	7.12e-06	-0.694118
CCL2	-0.0447049	1.96e-05	-0.654941	2.03e-05	-0.666387
MEGF9	-0.0454081	7.32e-05	-0.619183	0.0029005	-0.493557
CXCL6	-0.0454412	1.96e-05	-0.655053	2.57e-05	-0.659944
CXCL1	-0.0455981	1.02e-05	-0.671102	4.26e-05	-0.645658
LEPREL1	-0.0456138	2.43e-05	-0.649403	0.0108388	-0.428291
LGALS2	-0.0456515	5.48e-05	-0.627452	0.000372349	-0.57619
HBEGF	-0.0456522	3.94e-06	-0.693089	9.32e-06	-0.687115
ANGPTL4	-0.0458301	7.79e-06	-0.677546	9.54e-05	-0.621569
CHRD	-0.0459427	1.05e-05	-0.670494	0.00331882	-0.487395
S100A10	-0.045963	4.73e-06	-0.688989	0.000396344	-0.57395
CXCL3	-0.0460527	1.76e-05	-0.657696	0.000201301	-0.597479
COL5A3	-0.0462807	1.41e-05	-0.663209	0.000336112	-0.579832
MATN2	-0.0463156	5.24e-06	-0.686688	0.000991189	-0.539216
ANXA5	-0.0463829	1.38e-05	-0.663709	0.000228011	-0.593277
FGF14	-0.0468138	2.21e-05	-0.651912	5.42e-05	-0.638655
LAMB2	-0.046863	3.8e-06	-0.693873	0.00404494	-0.478151
EGLN1	-0.0470246	1.72e-05	-0.658241	0.0030657	-0.491036
COL6A6	-0.0470468	3.01e-05	-0.643855	0.00976571	-0.433894
BMP3	-0.0470629	1.93e-05	-0.655325	8.33e-05	-0.62577
PLXNA2	-0.0471712	5.59e-06	-0.685231	0.00019796	-0.598039
FAM20B	-0.0472851	2.52e-06	-0.702761	1.57e-05	-0.673389
CLEC4G	-0.0473775	5.24e-06	-0.6867	5.85e-05	-0.636415
AGT	-0.0474077	4.56e-06	-0.689809	0.000216968	-0.594958
SRGN	-0.047434	9.84e-06	-0.672021	0.000358019	-0.577591
FBN1	-0.0474564	1.03e-05	-0.671039	0.00123741	-0.530252
TSPEAR	-0.0476376	4.43e-06	-0.690439	1.44e-05	-0.67563
NRG2	-0.0477646	9.42e-07	-0.722784	7.69e-07	-0.759104
PODN	-0.0478146	1.29e-05	-0.665428	0.010398	-0.430532
ITLN2	-0.0480774	5.32e-06	-0.686338	2.21e-05	-0.651861
SEMA6B	-0.0481225	7.51e-06	-0.678413	0.000514425	-0.564426
PCSK6	-0.0482872	2.5e-06	-0.702945	3.83e-05	-0.648739
COCH	-0.0483029	3.37e-06	-0.696475	1.5e-05	-0.67451
PLOD2	-0.0483441	2.31e-06	-0.704588	1.49e-06	-0.736415
NGF	-0.0483623	2.77e-06	-0.700742	0.000237595	-0.591877
FREM1	-0.0484874	6.78e-06	-0.680787	0.0154994	-0.408403
CRHBP	-0.0484882	1.11e-05	-0.669023	0.000352426	-0.578151
CSF3	-0.0485728	2.92e-06	-0.699622	0.000222428	-0.594118
ADAMTS15	-0.048614	4.81e-06	-0.6886	0.000431585	-0.570868
CBLN1	-0.0486481	3.18e-06	-0.697727	5.37e-05	-0.638936
TNFSF14	-0.0487015	2.38e-06	-0.703961	9.22e-06	-0.687395
SERPINE3	-0.0488095	3.22e-06	-0.697465	1.58e-06	-0.712467
VEGFC	-0.048982	7.78e-07	-0.726493	8.91e-07	-0.753501
FGL2	-0.0491013	8.47e-06	-0.675579	0.0023446	-0.503081
EYS	-0.0492765	1.8e-06	-0.709742	1.27e-06	-0.741457
IGFBP5	-0.0493042	6.61e-06	-0.681394	0.00906989	-0.437815
NTN4	-0.0494881	5.64e-06	-0.685027	0.00735138	-0.448739
SPARCL1	-0.0495467	6.16e-06	-0.682992	0.055796	-0.326891
A2M	-0.0498841	2.63e-06	-0.7018	0.00622783	-0.457143
F10	-0.0498982	7.56e-07	-0.727039	0.000667726	-0.554622
SDC2	-0.0499221	1.03e-06	-0.721021	0.000293487	-0.584594
ADAM33	-0.0499589	1.33e-06	-0.715918	0.00117127	-0.532493
VTN	-0.0502324	1.36e-06	-0.715441	3.87e-05	-0.648459
ANXA1	-0.0502757	6.26e-07	-0.730633	1.49e-06	-0.736415
HGF	-0.0503737	2.61e-06	-0.701959	0.031899	-0.364706
TNN	-0.0504007	7.62e-07	-0.726885	9.71e-07	-0.75042
COL4A1	-0.0504424	1.02e-06	-0.721291	4.98e-05	-0.641176
FGF13	-0.0504497	2.56e-07	-0.74689	2.58e-07	-0.809804
ABI3BP	-0.0504892	1.66e-06	-0.711495	0.0276984	-0.373669
BMP5	-0.0505223	9.2e-07	-0.723241	1.14e-06	-0.718991
SEMA6A	-0.0505862	5.41e-07	-0.733365	0.000291137	-0.584874
SCUBE1	-0.0506431	6.68e-07	-0.729392	3.32e-06	-0.714006
IGFBP3	-0.0509333	5.42e-07	-0.733346	0.000191427	-0.59916
IGFBP6	-0.0511224	2.94e-07	-0.74444	4.43e-05	-0.644538
CTSG	-0.0511782	4.46e-07	-0.736925	0.00011922	-0.614566
ADAM23	-0.0512521	1.12e-06	-0.719304	0.00602189	-0.458824
SERPINI1	-0.0513043	2.8e-07	-0.745307	6.89e-06	-0.694958
BMP6	-0.0513143	7.65e-07	-0.726822	1.65e-05	-0.671989
DPT	-0.0513674	5.94e-07	-0.731629	0.000303057	-0.583473
SERPINA3	-0.0298229	0.0098165	-0.430609	0.0417086	-0.347059
C1QTNF4	-0.0296227	0.0320762	-0.363032	0.313155	-0.17507
LOX	-0.0296127	0.0249941	-0.378411	0.469088	-0.12605
LIF	-0.0295643	0.00394237	-0.474906	0.00629781	-0.456583
SCUBE2	-0.0295104	0.00570827	-0.45762	0.0146821	-0.411485
PTN	-0.0294788	0.00611871	-0.454277	0.00209001	-0.508123
CLEC2L	-0.0294626	0.0203573	-0.390567	0.0899856	-0.290917
CTSC	-0.0291175	0.0158312	-0.404902	0.00801905	-0.444258
NOV	-0.0290526	0.0280967	-0.371283	0.44748	-0.132213
CTF1	-0.0290042	0.00317559	-0.484613	0.000510548	-0.564706
SULF2	-0.0288027	0.0152833	-0.406863	0.252387	-0.198319
KAL1	-0.0285721	0.0406803	-0.347717	0.269077	-0.191597
BMP4	-0.0284922	0.0161288	-0.403861	0.0536374	-0.329692
CTSF	-0.0283856	0.0125415	-0.417671	0.0417086	-0.347059
C17orf58	-0.0274419	0.0104067	-0.427569	0.00168572	-0.517367
WNT3	-0.0272755	0.0126345	-0.417273	0.0017885	-0.514846
LEFTY2	-0.0271988	0.0525474	-0.330417	0.527573	-0.110084
SERPINB1	-0.0271879	0.0135231	-0.413592	0.0536374	-0.329692
CCL8	-0.0270996	0.00594712	-0.455651	0.000325614	-0.580952
CCL4	-0.0267446	0.0295878	-0.368086	0.197219	-0.222969
CPN2	-0.0263836	0.0178695	-0.398072	0.00993205	-0.430002
HMSD	-0.0263579	0.015386	-0.406491	0.000772459	-0.54902
ADAM9	-0.0262994	0.063066	-0.317528	0.37544	-0.154062
PXDN	-0.0257381	0.01023	-0.428464	0.00676951	-0.452941
LGALS1	-0.0256981	0.0160957	-0.403975	0.00707469	-0.4507
RSPO1	-0.0255066	0.0202091	-0.390992	0.0343362	-0.359944
CXCL14	-0.0255033	0.0233269	-0.382548	0.255805	-0.196919
TNFAIP6	-0.025337	0.0355866	-0.356422	0.177312	-0.233053
SEMA4F	-0.0250393	0.0282532	-0.370941	0.00333902	-0.487115
C1QL1	-0.0249837	0.0257382	-0.376638	0.0540637	-0.329132
CLEC2B	-0.0248501	0.0419953	-0.345614	0.336412	-0.166947
CBLN3	-0.0247977	0.0321509	-0.362886	0.00715281	-0.45014
PSPN	-0.0246962	0.0409737	-0.347243	0.0297373	-0.369188
COL14A1	-0.0246789	0.164845	-0.240046	0.332328	0.168347
NPNT	-0.0246255	0.0677821	-0.312296	0.69434	-0.0686275
COL17A1	-0.0246155	0.0668698	-0.313285	0.146487	-0.25042
SLIT2	-0.024547	0.159703	-0.242915	0.78786	0.0470588
TIMP1	-0.0244685	0.0260255	-0.375964	0.0281969	-0.372549
FGF16	-0.0241222	0.0847423	-0.295561	0.170357	-0.237041
IL1B	-0.0237503	0.0201104	-0.391276	0.00941229	-0.435854
CCL24	-0.023745	0.063963	-0.31651	0.0547082	-0.328291
SERPIND1	-0.0236528	0.0744574	-0.305358	0.409538	-0.143899
FBLN1	-0.0236426	0.10938	-0.275356	0.913676	0.0190476
C1QTNF2	-0.0231953	0.109198	-0.275491	0.580565	-0.0963585
TSKU	-0.0231906	0.0164353	-0.402805	0.00429067	-0.47535
CLC	-0.0231791	0.0354765	-0.356621	0.0606313	-0.32035
SRPX2	-0.0230546	0.0219429	-0.386173	0.0094621	-0.435574
CBLN4	-0.023028	0.139029	-0.255173	0.996797	-0.000840336
BDNF	-0.0229854	0.0340232	-0.359297	0.154033	-0.245938
SDC4	-0.0229231	0.0306233	-0.365942	0.0398378	-0.35014
COL6A1	-0.0228921	0.0891969	-0.291602	0.505617	-0.115966
MMP16	-0.0228807	0.229761	-0.208331	0.847789	0.0336134
HTRA3	-0.0228589	0.0577747	-0.323779	0.178379	-0.232493
LOXL3	-0.0227796	0.073083	-0.306745	0.190415	-0.226331
ADAMTS16	-0.0227181	0.115278	-0.27104	0.504583	-0.116246
IFNG	-0.022618	0.07052	-0.309388	0.0192555	-0.395798
EMILIN3	-0.0225375	0.154687	-0.245778	0.417982	-0.140896
WNT11	-0.0224693	0.0195631	-0.392875	0.0024818	-0.50056
CRLF3	-0.0223177	0.173966	-0.235111	0.395021	-0.147899
ADAMTS8	-0.0221705	0.136649	-0.256669	0.481105	-0.122689
TNFSF9	-0.0218383	0.0385348	-0.351269	0.0269644	-0.37535
LRG1	-0.0216424	0.0226735	-0.384237	0.0211555	-0.390196
NTN3	-0.021194	0.224841	-0.210499	0.750433	-0.0557462
ASPN	-0.0211325	0.207148	-0.218572	0.973738	-0.00588235
C1QTNF7	-0.0208201	0.13948	-0.254892	0.55431	0.103081
ADAMTS7	-0.0206937	0.0649226	-0.315433	0.27552	-0.189076
LTBP1	-0.0205632	0.207618	-0.218351	0.852827	0.032493
TGM2	-0.0205441	0.0746587	-0.305156	0.185423	-0.228852
EDIL3	-0.0205111	0.227988	-0.209109	0.397737	0.147059
C1QA	-0.0197806	0.0923083	-0.288926	0.0697278	-0.310644
SERPINB4	-0.0197189	0.17684	-0.233595	0.199887	-0.222023
CRISPLD2	-0.0196683	0.156259	-0.244873	0.493282	-0.119328
FGF9	-0.0195821	0.137281	-0.256269	0.140559	-0.254062
CRLF1	-0.0195573	0.0905062	-0.290467	0.0776579	-0.302521
CD109	-0.0193529	0.185729	-0.229013	0.899676	0.0221289
FREM2	-0.0193478	0.0797461	-0.300198	0.0373977	-0.354342
CCL18	-0.0192322	0.357596	-0.160314	0.842758	-0.0347339
CCL26	-0.0190406	0.128122	-0.262187	0.161861	-0.241457
COL6A2	-0.019	0.146864	-0.250381	0.543539	-0.105882
LGI1	-0.0189632	0.136961	-0.256471	0.330807	-0.16934
EGLN2	-0.0189306	0.0308139	-0.365554	0.0105067	-0.429972
CCL4L1	-0.0189244	0.224162	-0.2108	0.391417	-0.14902
SERPINB7	-0.0188185	0.0416886	-0.346099	0.0118891	-0.423249
COL4A4	-0.0187798	0.281501	-0.187222	0.861657	-0.0305322
HPX	-0.0186839	0.119405	-0.268119	0.359857	-0.159104
TGFB1	-0.0184945	0.196674	-0.223578	0.664844	-0.0756303
LMAN1	-0.0183727	0.105329	-0.278421	0.177312	-0.233053
LOXL2	-0.0181088	0.0947646	-0.286861	0.142364	-0.252941
ADAMTS12	-0.0177684	0.101061	-0.28175	0.176781	-0.233333
GREM1	-0.017604	0.112629	-0.272958	0.11433	-0.271709
LAMA3	-0.0175084	0.208384	-0.217993	0.875566	-0.027451
IL16	-0.0174753	0.316379	-0.174388	0.806475	-0.0428571
ANXA2	-0.0170818	0.0801367	-0.299827	0.17625	-0.233613
PLAT	-0.0165713	0.104788	-0.278837	0.199525	-0.221849
LGALS4	-0.016434	0.180177	-0.231856	0.122623	-0.265826
HTRA1	-0.0163708	0.163767	-0.240642	0.421725	-0.139776
MUC12	-0.0162613	0.233824	-0.206565	0.650702	-0.0792939
ADAMTS10	-0.015919	0.334211	-0.168169	0.934086	-0.0145658
PAPLN	-0.0158439	0.392907	-0.149016	0.543539	0.105882
CLEC4F	-0.0158422	0.159567	-0.242991	0.0823269	-0.298039
WNT2	-0.0154766	0.202344	-0.220846	0.925151	-0.0165266
CPAMD8	-0.0151731	0.162464	-0.241366	0.0220605	-0.387675
FRZB	-0.0150379	0.380759	-0.152833	0.489205	0.120448
SERPINF2	-0.0148112	0.316058	-0.174501	0.835222	-0.0364146
PLOD3	-0.0147542	0.11378	-0.272121	0.0507288	-0.333613
SBSPON	-0.0144378	0.258602	-0.196217	0.525462	-0.110644
LGI3	-0.0143241	0.356628	-0.160633	0.835222	-0.0364146
TNFSF8	-0.0142698	0.526587	-0.110726	0.831459	-0.0372549
TNC	-0.0140633	0.432896	-0.136908	0.808965	0.0422969
PXDNL	-0.0139454	0.150961	-0.247948	0.0491247	-0.335854
SEMA3A	-0.0137886	0.272865	-0.190556	0.192665	-0.22521
TNFSF13B	-0.0135862	0.404019	-0.145584	0.638143	-0.0820728
ITIH3	-0.0134944	0.298499	-0.180848	0.967336	-0.00728291
SEMA4C	-0.0133672	0.0854351	-0.294935	0.0939637	-0.287675
CCL3	-0.0132474	0.212682	-0.215997	0.152121	-0.247059
VWA5A	-0.0131223	0.181517	-0.231164	0.229958	-0.207843
SERPINE1	-0.0130722	0.347534	-0.163654	0.711058	-0.0647059
XCL2	-0.01275	0.542035	-0.106643	0.703876	-0.0663866
EFEMP2	-0.0126061	0.187255	-0.228242	0.0799657	-0.30028
BTC	-0.0124716	0.126791	-0.263074	0.17625	-0.233613
PGF	-0.012202	0.35806	-0.160162	0.688403	-0.070028
C1QB	-0.0119839	0.3285	-0.170137	0.262036	-0.194398
ELN	-0.0117693	0.563402	-0.101086	0.583886	0.0955182
MEGF6	-0.0116488	0.30057	-0.180087	0.916225	-0.0184874
TGFB3	-0.0115821	0.543284	-0.106315	0.649699	0.0792717
ADAMTS2	-0.0114279	0.432447	-0.13704	0.889512	0.0243697
FGF12	-0.0111806	0.202829	-0.220615	0.353905	-0.161064
FGFBP1	-0.0110667	0.189351	-0.22719	0.12798	-0.262185
PDGFA	-0.0109849	0.379996	-0.153075	0.740029	-0.0579832
C1QC	-0.0109112	0.369516	-0.156429	0.186525	-0.228291
CLEC12A	-0.0108811	0.454792	-0.130541	0.570654	-0.0988796
COL9A3	-0.0107122	0.461714	-0.128563	0.859132	0.0310924
IL18	-0.0107048	0.524563	-0.111265	0.541397	-0.106443
BMP1	-0.0106812	0.328091	-0.170279	0.42643	-0.138375
SDC3	-0.0104047	0.49163	-0.120188	0.379838	-0.152661
OGFOD1	-0.0100383	0.269972	-0.191688	0.362427	-0.158263
CILP	-0.00997764	0.710617	-0.0650096	0.3556	0.160504
PCOLCE	-0.00990421	0.443842	-0.133703	0.902219	-0.0215686
OSM	-0.00969423	0.145971	-0.250917	0.100414	-0.282353
ADAM10	-0.00963314	0.522857	-0.11172	0.992953	-0.00168067
FGFBP3	-0.00951179	0.486527	-0.121597	0.511842	-0.114286
CCL4L2	-0.00939031	0.487721	-0.121267	0.490223	-0.120168
IL15	-0.00938054	0.376969	-0.154038	0.178379	-0.232493
TDGF1	-0.00932512	0.463514	-0.128051	0.949061	0.0112053
WNT5B	-0.00924952	0.399191	-0.147068	0.607369	-0.0896359
WFIKKN1	-0.00911351	0.620409	-0.086707	0.790336	0.0464986
ANXA4	-0.00888639	0.791902	-0.0462533	0.86292	0.0302521
NGLY1	-0.00882919	0.253144	-0.198438	0.0875251	-0.293277
GDF6	-0.00876916	0.879943	-0.0264883	0.620967	0.0862745
VWCE	-0.00875474	0.268236	-0.192371	0.216197	-0.214006
S100A3	-0.00840907	0.381844	-0.152489	0.520203	-0.112045
S100A6	-0.00828615	0.240987	-0.203501	0.160372	-0.242297
CLCF1	-0.0082272	0.292873	-0.182931	0.282798	-0.186275
ACAN	-0.00809673	0.904427	-0.0210583	0.238366	0.204202
CCL20	-0.00803935	0.293925	-0.18254	0.218655	-0.212885
FAM20C	-0.00780546	0.294778	-0.182223	0.307699	-0.177031
COLQ	-0.00774968	0.586748	-0.0951235	0.582778	-0.0957983
CHRDL2	-0.00772768	0.60479	-0.0905873	0.748549	-0.0560224
ADAMTS17	-0.00762241	0.584984	-0.0955702	0.625528	-0.0851541
VWC2	-0.00748958	0.999252	0.000164438	0.992953	0.00168067
PIK3IP1	-0.00725841	0.968677	-0.00688748	0.911129	-0.0196078
TGM1	-0.00705914	0.305032	-0.17846	0.182691	-0.230252
ADAMTS13	-0.00700642	0.414147	-0.142502	0.841501	-0.035014
KAZALD1	-0.00690592	0.431806	-0.137229	0.816447	0.0406162
AMH	-0.00679883	0.563024	-0.101183	0.332328	-0.168347
BMP8B	-0.00658673	0.637202	-0.08258	0.54999	-0.104202
S100A4	-0.0063569	0.427309	-0.138561	0.218039	-0.213165
ADAM17	-0.0061496	0.589595	-0.0944037	0.990391	0.0022409
ADAMTS19	-0.00610589	0.937729	0.0137026	0.807989	0.0426069
CST7	-0.00601452	0.887166	-0.024884	0.860395	0.0308123
COL4A3	-0.00530716	0.903307	-0.0213062	0.582778	0.0957983
SPON2	-0.00514471	0.842229	-0.0349018	0.700294	0.0672269
GPC4	-0.00482307	0.687408	-0.0704891	0.757098	-0.0540616
PRSS12	-0.00361658	0.484806	-0.122075	0.273361	-0.189916
CTSS	-0.00349221	0.785357	0.0477424	0.987828	0.00280112
HCFC1	-0.00338903	0.570659	-0.0992206	0.314725	-0.17451
GPC1	-0.00334529	0.624281	-0.0857515	0.978861	-0.00476191
CST6	-0.00322547	0.628609	-0.0846863	0.224886	-0.210084
CXCL5	-0.00297724	0.647506	-0.0800696	0.946865	-0.0117647
CRELD2	-0.00267383	0.453847	-0.130812	0.124253	-0.264706
ADAMTS6	-0.0025421	0.767662	0.0517848	0.182691	0.230252
COL4A5	-0.00254043	0.83275	0.0370277	0.332328	0.168347
NTN1	-0.0025199	0.666075	-0.0755842	0.945586	-0.0120448
TNFSF13	-0.00249992	0.833985	-0.0367506	0.607369	-0.0896359
FLT3LG	-0.00246915	0.792737	-0.0460635	0.364146	-0.157703
XCL1	-0.00210478	0.91942	0.0177429	0.640447	-0.0815126
LTBP3	-0.00206323	0.854857	-0.0320769	0.712258	0.0644258
LAMC3	-0.0015891	0.762608	-0.0529441	0.671879	0.0739496
COL12A1	-0.00134102	0.996324	-0.000808197	0.638143	0.0820728
SEMA3F	-0.0011185	0.451046	-0.131618	0.237059	-0.204762
CCL7	-0.00111684	0.677304	-0.072895	0.98025	-0.00434204
OVGP1	-0.000475182	0.69555	-0.0685596	0.257871	-0.196078
LUM	-0.000294325	0.830462	0.0375417	0.376317	0.153782
COL8A1	0.000735688	0.82285	0.0392539	0.461167	0.128291
EBI3	0.000932546	0.801794	0.0440089	0.936641	0.0140056
CTGF	0.00137994	0.821832	0.0394831	0.74246	0.057423
SPARC	0.00138157	0.729645	0.0605624	0.331514	0.168627
PDGFC	0.00138936	0.988304	-0.0025713	0.580565	-0.0963585
PLXNA1	0.00149253	0.869064	0.0289083	0.663674	0.0759104
PLXDC2	0.00187007	0.444574	0.133491	0.0509322	0.333333
IL1RN	0.00194401	0.787944	-0.0471534	0.702681	-0.0666667
NRG4	0.00198854	0.991234	-0.00192702	0.66017	-0.0767507
TGFBI	0.00204602	0.925187	-0.0164695	0.900947	-0.0218487
IL34	0.00226377	0.836766	0.0361263	0.934086	0.0145658
ADAM19	0.0024131	0.62919	0.0845436	0.232523	0.206723
CTSZ	0.00261035	0.476031	0.124521	0.880633	0.0263305
COL11A2	0.00300531	0.983323	-0.00366637	0.966056	-0.00756303
SLIT1	0.00317604	0.973681	-0.00578679	0.229081	-0.208629
EGFL6	0.00405091	0.479628	0.123515	0.112419	0.273109
IL11	0.00424574	0.933059	0.0147324	0.627814	0.0845938
CLEC2D	0.00433148	0.393097	0.148957	0.518106	0.112605
MMP15	0.00446029	0.90209	-0.0215757	0.39052	-0.1493
SEMA3E	0.00475221	0.959287	0.00895367	0.223004	-0.210924
INHA	0.0051509	0.86901	0.0289204	0.528631	-0.109804
BMP8A	0.00530014	0.408812	0.14412	0.0869006	0.293838
TNR	0.00533149	0.281085	0.187381	0.00524655	0.461637
CLEC7A	0.00549209	0.61708	0.0875305	0.479091	0.123249
HPSE	0.00590085	0.639263	0.0820766	0.757098	-0.0540616
MUC2	0.0060358	0.439184	0.135062	0.762782	-0.052904
ECM1	0.00607749	0.652687	0.0788131	0.16639	0.238936
COL6A3	0.00613222	0.429641	0.137869	0.0990285	0.283473
C1QTNF5	0.00621017	0.742907	0.0574849	0.930256	0.0154062
P4HA2	0.0065022	0.723464	0.0620029	0.636992	0.0823529
WNT16	0.0069887	0.272176	0.190825	0.0931158	0.288242
MMP23B	0.00735609	0.2385	0.204558	0.0386833	0.352101
ANXA11	0.00754599	0.982741	-0.00379435	0.516014	-0.113165
CTSW	0.00773819	0.450323	0.131827	0.530748	0.109244
PLAU	0.00781661	0.933223	0.0146962	0.816447	-0.0406162
CSPG5	0.00790933	0.67681	0.0730129	0.544612	0.105602
PI3	0.00824715	0.803751	0.0435657	0.775514	0.0498599
DDX26B	0.00870377	0.312976	0.175599	0.388727	0.14986
LAMA1	0.00874253	0.490028	0.12063	0.816447	0.0406162
TGFB2	0.00898064	0.38574	0.151259	0.170492	0.236695
CRISPLD1	0.00961148	0.19498	0.224405	0.0248587	0.380392
CCL19	0.00962081	0.255957	0.197289	0.17625	0.233613
C1QTNF3	0.00970647	0.30584	0.178167	0.16639	0.238936
ANXA9	0.00975123	0.750114	0.0558197	0.794053	-0.0456583
ADAM11	0.00996705	0.295744	0.181865	0.520203	0.112045
TNFSF18	0.0102067	0.378128	0.153669	0.487174	0.121008
FASLG	0.0105428	0.204147	0.219988	0.329082	0.169468
COL2A1	0.0109951	0.315845	0.174577	0.606665	0.0901192
MUC4	0.0109973	0.408919	0.144088	0.731066	0.0602318
SULF1	0.0110745	0.338499	0.166704	0.201266	0.221008
FGF11	0.0111567	0.291138	0.183579	0.251707	0.198599
SLPI	0.0113361	0.772147	0.0507578	0.384268	0.151261
CTSA	0.011926	0.447773	0.132563	0.591668	0.0935574
MFAP1	0.0119289	0.602343	0.0911992	0.818945	-0.040056
CTSE	0.0121541	0.43632	0.135901	0.172446	0.23592
CST2	0.0122647	0.325973	0.171015	0.405949	0.144538
TNFSF11	0.0124534	0.153669	0.246367	0.0285757	0.371709
LAMA5	0.0125914	0.430359	0.137657	0.259254	0.195518
SFTPD	0.0126468	0.451545	0.131474	0.939196	0.0134454
GAS6	0.0127149	0.362177	0.158812	0.907309	-0.0204482
P4HTM	0.0127772	0.339379	0.166405	0.500458	0.117367
CLEC4A	0.0130203	0.252817	0.198572	0.235757	0.205322
CCL5	0.0130376	0.170247	0.237101	0.441683	0.133894
COL18A1	0.0133354	0.397936	0.147456	0.181065	0.231092
GDF15	0.0135816	0.252482	0.198709	0.276966	0.188515
CLEC9A	0.0138517	0.187302	0.228218	0.120209	0.267507
PLXNB1	0.0139379	0.407586	0.144494	0.775514	0.0498599
ADAM32	0.0143714	0.430683	0.137561	0.845273	-0.0341737
SERPINE2	0.0144215	0.139561	0.254842	0.0356873	0.357423
HYAL3	0.0144336	0.516169	0.113512	0.452342	0.130812
SEMA4D	0.014658	0.126524	0.263252	0.148815	0.24902
CCL3L3	0.014797	0.222597	0.211498	0.162105	0.241566
MFGE8	0.0148615	0.352215	0.162093	0.441683	0.133894
MMP2	0.0149524	0.111841	0.273534	0.0180991	0.39944
S100A11	0.0151126	0.427885	0.13839	0.959656	0.00896358
CXCL9	0.0155286	0.103285	0.280003	0.0668932	0.313725
CHAD	0.0155948	0.0820275	0.298053	0.0824732	0.29764
VWA3A	0.0157883	0.175672	0.234209	0.425543	0.139085
SCUBE3	0.0157953	0.241411	0.203322	0.0731995	0.307003
FAM20A	0.0160114	0.242011	0.203068	0.267659	0.192157
HAPLN3	0.0161313	0.320298	0.173002	0.468094	0.126331
MMP8	0.0161791	0.0815199	0.298526	0.383283	0.152034
ANGPTL6	0.0162641	0.103632	0.279733	0.0197165	0.394398
SERPINA1	0.0163581	0.280488	0.18761	0.482114	0.122409
CTSK	0.0163605	0.091694	0.289448	0.0111222	0.426891
ADAM12	0.0170981	0.101233	0.281614	0.0393396	0.35098
ADAMTSL2	0.0171261	0.17704	0.23349	0.262036	0.194398
ISM1	0.0175346	0.182772	0.23052	0.0859704	0.294678
LTBP2	0.0176651	0.100887	0.281888	0.0363017	0.356303
BMP7	0.0178316	0.140264	0.254405	0.102874	0.280392
CLEC17A	0.0182425	0.0737147	0.306105	0.0279208	0.371669
BCAN	0.0182555	0.0772783	0.302571	0.0926475	0.288796
NTNG2	0.0184085	0.199791	0.222069	0.127562	0.262465
HTRA4	0.0185032	0.0339506	0.359433	0.00468361	0.471148
GDF9	0.0187327	0.22735	0.209389	0.790336	-0.0464986
TNF	0.0187351	0.206751	0.218758	0.492261	0.119608
EMILIN1	0.0189165	0.0676536	0.312434	0.00747279	0.447899
VWA9	0.0189699	0.165929	0.239449	0.425486	0.138655
MUC16	0.0190709	0.312173	0.175886	0.435928	0.135574
SERPINH1	0.0193546	0.196025	0.223895	0.669531	0.0745098
NTF3	0.0194372	0.111024	0.274135	0.040341	0.3493
TNFSF10	0.0195923	0.281343	0.187282	0.68485	-0.0708683
S100A13	0.0196662	0.300567	0.180088	0.818945	0.040056
MXRA5	0.0199691	0.0452815	0.340581	0.00755468	0.447339
PLXNA3	0.0202037	0.184695	0.229538	0.654344	0.0781513
SFRP2	0.020263	0.0305706	0.36605	0.0057891	0.460784
S100A16	0.021018	0.325715	0.171105	0.954538	0.010084
PLOD1	0.0214466	0.120194	0.267569	0.565181	0.10028
TNFSF15	0.0215634	0.107038	0.277117	0.271214	0.190756
WNT4	0.0217594	0.0383647	0.351558	0.0125092	0.420448
FGF18	0.0218127	0.156537	0.244714	0.255805	0.196919
ANXA13	0.0218982	0.0323834	0.362431	0.0189832	0.396639
POSTN	0.0220714	0.0368075	0.354248	0.00487743	0.469188
COL24A1	0.0220873	0.0148442	0.408478	0.000255759	0.589356
IL12A	0.0221014	0.142682	0.252915	0.287966	0.184314
NRG1	0.0223286	0.0336186	0.360059	0.00201073	0.509804
CSTB	0.0224407	0.0941518	0.287372	0.216197	0.214006
COL9A1	0.0228078	0.0915668	0.289557	0.996797	0.000840336
COL1A2	0.0233085	0.0177348	0.398502	0.000739607	0.5507
ARTN	0.0234156	0.0651332	0.315198	0.0790941	0.30112
SFRP5	0.0234193	0.0685687	0.311451	0.150539	0.248197
SEMA5B	0.0235598	0.0501777	0.333601	0.0185367	0.398039
SFRP4	0.0235877	0.0235901	0.381879	0.0024353	0.501401
CLEC11A	0.023744	0.0220482	0.38589	0.00409308	0.477591
SEMA4A	0.0238459	0.107962	0.276419	0.273361	0.189916
SEMA4G	0.023916	0.0860118	0.294417	0.264838	0.193277
CTSD	0.024047	0.0202605	0.390844	0.139217	0.254902
KY	0.0242237	0.0212495	0.388061	0.00253837	0.49438
COL5A2	0.0245574	0.0206893	0.389624	0.0194388	0.395238
PLXNC1	0.0247465	0.0127755	0.416675	0.00916661	0.437255
S100A1	0.0249402	0.160064	0.242711	0.555393	0.102801
CCL11	0.0250546	0.139351	0.254972	0.607369	0.0896359
CCL17	0.0251239	0.0185968	0.395792	0.00094325	0.534408
CCL22	0.0253001	0.0135521	0.413475	0.0151978	0.409524
CTSH	0.0254549	0.0144575	0.409934	0.00966359	0.434454
COL3A1	0.0255271	0.00914138	0.434283	0.000220595	0.594398
MATN3	0.0255928	0.0340127	0.359317	0.0129596	0.418487
GDF11	0.0257073	0.0329061	0.361418	0.0209587	0.390756
COL5A1	0.0261947	0.0132652	0.414639	0.00084207	0.545658
VWA1	0.0262681	0.0912675	0.289813	0.462153	0.128011
MMP3	0.0263512	0.0217763	0.386622	0.00156413	0.514564
KERA	0.0263947	0.00663538	0.450333	0.00105492	0.530121
TGFA	0.0265381	0.0240005	0.380848	0.00841706	0.441737
P4HA1	0.0269786	0.0274801	0.372646	0.0454791	0.341176
LEPRE1	0.0270653	0.0150798	0.407607	0.00149564	0.522409
AEBP1	0.0270788	0.0175487	0.399102	0.0170841	0.402801
A2ML1	0.0273904	0.0300949	0.367028	0.0455189	0.340229
P4HA3	0.0274493	0.00890903	0.435601	0.000110088	0.617087
CCL28	0.0274632	0.0255088	0.37718	0.282798	0.186275
COL16A1	0.0278372	0.00832608	0.439041	0.000571514	0.560504
WISP1	0.0282011	0.00714911	0.446664	7.05e-05	0.630812
MMP10	0.0285119	0.0442169	0.342178	0.307939	0.177408
CXCL13	0.0285993	0.00961049	0.431707	0.00540812	0.464146
THBS3	0.0288221	0.0289472	0.369443	0.00814988	0.443417
MEGF10	0.0289438	0.0198893	0.391918	0.0151232	0.409804
SERPINA5	0.0289499	0.0242007	0.38035	0.00850777	0.441176
ZP3	0.0294914	0.0423756	0.345015	0.3556	0.160504
COL7A1	0.0297528	0.00592053	0.455866	0.00209001	0.508123
THBS2	0.0299164	0.00592405	0.455838	0.00673217	0.453221
GDF10	-0.0514452	1.26e-06	-0.717046	0.0143229	-0.412885
VEGFA	-0.0515344	1.47e-07	-0.756491	4.65e-05	-0.643137
C1QTNF1	-0.0515415	2.54e-07	-0.747076	3.4e-05	-0.652101
CD209	-0.0515592	5.16e-07	-0.73424	4.18e-05	-0.646218
ANXA6	-0.0516366	9.05e-08	-0.764421	1.91e-06	-0.729132
HCFC2	-0.051648	9.71e-07	-0.722187	0.00784742	-0.445378
ANGPT2	-0.0516652	1.18e-06	-0.718262	0.000455439	-0.568908
SNED1	-0.0519167	2.19e-07	-0.749673	0.000251618	-0.589916
ELANE	-0.0519889	1.94e-07	-0.751762	3.09e-05	-0.643168
CLEC1A	-0.0520606	1.97e-07	-0.751421	2.56e-06	-0.721008
MSTN	-0.0521293	1.77e-07	-0.753255	3.94e-06	-0.709524
CCBE1	-0.0522579	1.85e-07	-0.752514	1.58e-05	-0.673109
CCL13	-0.0522646	1.74e-07	-0.753598	1.58e-05	-0.673109
ZP1	-0.0523257	2.37e-07	-0.74823	3.14e-08	-0.780867
COL15A1	-0.0523665	1.56e-07	-0.755471	0.000123493	-0.613445
FSTL1	-0.0524052	1.74e-07	-0.753598	0.000101591	-0.619608
COLEC11	-0.052437	3.89e-08	-0.777621	6.57e-07	-0.765546
THBS4	-0.0527812	1.86e-07	-0.752488	4.74e-05	-0.642577
PAPPA	-0.0528548	4.33e-07	-0.737493	0.000818272	-0.546779
S100B	-0.0529215	7.28e-08	-0.767925	1.33e-06	-0.740056
LAMC1	-0.0529236	1.94e-08	-0.78788	3.65e-06	-0.711485
GLDN	-0.0529735	1.37e-07	-0.757658	1.27e-05	-0.678992
COL25A1	-0.0530504	7.17e-08	-0.768155	0.00354706	-0.484314
ADAMTSL4	-0.0530514	1.34e-07	-0.757956	0.00181207	-0.514286
LGALS12	-0.0531997	6.22e-08	-0.77039	1.56e-06	-0.735014
CCL14	-0.0532212	2.09e-07	-0.750462	0.00986875	-0.433333
IL6	-0.053398	1.43e-08	-0.792166	2.13e-06	-0.72605
CCL21	-0.0534641	6.3e-08	-0.770186	2.54e-05	-0.660224
ANGPTL2	-0.0534685	4.25e-08	-0.77628	8.33e-07	-0.756022
SFRP1	-0.0535272	3.89e-08	-0.777642	5.38e-06	-0.701401
PLXNA4	-0.0535455	9.66e-09	-0.79762	5.12e-07	-0.776751
KITLG	-0.0536029	9.19e-08	-0.764181	0.000305492	-0.583193
LGALS8	-0.0536656	6.5e-08	-0.76971	9.02e-06	-0.687955
LGI4	-0.0537091	2.7e-08	-0.7831	0.00033346	-0.580112
ANGPTL7	-0.053742	1.32e-07	-0.758233	3.61e-05	-0.65042
FBLN2	-0.0537499	2.82e-08	-0.782424	0.000286488	-0.585434
LEP	-0.0538289	1.91e-08	-0.788072	1.82e-06	-0.730532
MMP28	-0.0539469	3.72e-09	-0.810142	1.62e-06	-0.733894
ANGPTL1	-0.0539649	6.84e-08	-0.768905	0.00367724	-0.482633
MUC3A	-0.0540064	1.96e-08	-0.787736	2.7e-07	-0.807843
PRG4	-0.0540333	2.24e-08	-0.78579	8.64e-06	-0.689076
FIGF	-0.0543401	1.26e-08	-0.793992	8.52e-07	-0.755182
FGFBP2	-0.054415	1.88e-08	-0.788296	4.83e-07	-0.779552
FCN2	-0.0545375	3.39e-08	-0.779708	3.28e-05	-0.641502
WNT2B	-0.054559	2.84e-08	-0.782322	7.6e-05	-0.628571
OGN	-0.0547756	4.8e-08	-0.774409	0.000307945	-0.582913
CLEC14A	-0.0548834	1.12e-08	-0.795631	3.27e-05	-0.653221
LTBP4	-0.0549089	1.9e-08	-0.788189	7.12e-05	-0.630532
TINAGL1	-0.0549548	5.97e-09	-0.804046	7.67e-05	-0.628291
IL20	-0.0550255	3.01e-09	-0.812802	1.83e-08	-0.788736
ADAMTS5	-0.0550531	1.06e-08	-0.796404	2.87e-06	-0.717927
PCSK5	-0.0550814	1.26e-08	-0.79396	6.25e-05	-0.634454
ITLN1	-0.0551668	6.31e-09	-0.803326	8.71e-07	-0.754342
ADAMTS1	-0.055177	5.78e-09	-0.804466	2.47e-05	-0.661064
SLIT3	-0.0552111	2.48e-08	-0.784309	0.000653156	-0.555462
IGFBP1	-0.0552132	1.03e-08	-0.796741	4.93e-05	-0.630414
MMRN1	-0.0553579	1.55e-08	-0.791057	0.00150568	-0.522129
EGFLAM	-0.0554232	9.85e-09	-0.797354	6.93e-07	-0.763305
EFEMP1	-0.0554459	8.25e-09	-0.799751	0.000141998	-0.608964
EMCN	-0.0555182	4.89e-09	-0.806659	3.76e-05	-0.6493
RELN	-0.0557191	6.36e-09	-0.803214	0.000451961	-0.569188
ANGPTL5	-0.0558556	3.67e-09	-0.810319	1.17e-05	-0.667834
TPO	-0.0560056	2.5e-09	-0.815115	0.000118173	-0.614846
FBLN5	-0.0560853	1.59e-09	-0.820562	1.93e-06	-0.728852
HSPG2	-0.0560957	1.94e-09	-0.818231	1.78e-05	-0.670028
ANGPT1	-0.0561257	3.6e-09	-0.810581	0.000102505	-0.619328
NID1	-0.0562367	6.42e-09	-0.803089	0.000615673	-0.557703
LAMB1	-0.0563007	8.04e-09	-0.80011	1.58e-05	-0.673109
HYAL1	-0.0563247	4.04e-10	-0.836106	4.33e-06	-0.707003
TNXB	-0.0563679	7.69e-10	-0.829008	1.5e-05	-0.67451
BMP2	-0.0564431	8.76e-10	-0.827536	5.38e-06	-0.701401
CXCL2	-0.0564755	7.03e-10	-0.830027	1.56e-06	-0.735014
SRPX	-0.0566699	2.99e-09	-0.812909	1.41e-05	-0.67619
CLEC3B	-0.0568392	1.42e-10	-0.846993	9.56e-07	-0.75098
ADIPOQ	-0.0571851	7.77e-10	-0.828898	6.16e-07	-0.768347
BMPER	-0.0572005	1.22e-09	-0.823702	1.17e-05	-0.681232
LAMA2	-0.0572385	3.41e-10	-0.837923	1.35e-05	-0.677311
ITIH5	-0.0573792	1.78e-10	-0.844662	1.08e-06	-0.746779
CSPG4	-0.0573922	6.88e-10	-0.830259	3.77e-06	-0.710644
MMRN2	-0.057396	5.25e-10	-0.833259	1.6e-05	-0.672829
TIMP4	-0.0576619	1.34e-10	-0.847533	5.71e-07	-0.771709
ANXA8	-0.0576675	3.86e-10	-0.836612	2.76e-07	-0.74557
ECM2	-0.0576832	1.68e-10	-0.845286	2.58e-06	-0.720728
C1QTNF9	-0.0579661	1.77e-10	-0.844751	1.36e-06	-0.739216
PARM1	-0.0579794	4.65e-10	-0.834598	0.000546392	-0.562185
ADAMTSL3	-0.0582545	5.04e-11	-0.856957	9.33e-07	-0.751821
VIT	-0.0584191	5.04e-11	-0.856957	8.46e-06	-0.689636
PCOLCE2	-0.0584482	2.02e-11	-0.865178	6.14e-08	-0.854062
FGF10	-0.0587522	3.02e-11	-0.861638	2.72e-06	-0.719328
FGF2	-0.0588359	4.53e-11	-0.857942	2.43e-06	-0.722409
SVEP1	-0.0588401	8.85e-12	-0.872194	2.38e-07	-0.813445
GPC3	-0.0588639	7.93e-12	-0.873097	9.25e-08	-0.845098
CHRDL1	-0.0590342	9.87e-12	-0.871292	2.15e-06	-0.72577
LAMA4	-0.0591083	1.11e-11	-0.87028	3.58e-07	-0.794398
VWF	-0.0593271	1.44e-11	-0.868111	1.99e-06	-0.728011
MASP1	-0.0598097	4.56e-12	-0.877536	3.85e-06	-0.710084
CRIM1	-0.0607568	3.8e-13	-0.895543	4.52e-05	-0.643978
SEMA3G	-0.0617676	1.23e-14	-0.915945	1.27e-07	-0.836415

## Sheet: Table S13
Supplementary Table 13: Loading weight matrix of the first latent variable from PLS regression on all protein-coding genes vs disease score. Univariate correlation coefficients and pvalues are included.
Filtered applied to display top 7,380 genes (loading weight >|0.007|)
PLS model weights		univariate correlations
genes	loading.weights	pearson.pvalues	pearson.rvalues	spearman.pvalues	spearman.rvalues
A1BG	0.00232709	0.303581	0.178987	0.420787	0.140056
RHOF	0.0139034	4.44e-10	0.835096	3.02e-05	0.655462
A2ML1	0.00668237	0.0300949	0.367028	0.0455189	0.340229
ST14	0.0137708	1.11e-09	0.824804	4.62e-06	0.705322
AAAS	0.00596799	0.0876515	0.292958	0.537125	0.107563
H2AFY2	0.0136526	2.93e-09	0.813131	7.68e-06	0.692157
MAG	0.0135868	5.53e-09	0.805065	0.000123862	0.603561
TRIM59	0.013586	2.15e-09	0.816971	5.37e-07	0.77451
AADAT	-0.00376589	0.171161	-0.236609	0.050526	-0.333894
EPHA1	0.0135304	4.83e-09	0.806819	5.17e-05	0.640056
AAGAB	0.00697973	0.0660705	0.314161	0.357299	0.159944
CCDC33	0.0134502	1.35e-08	0.793055	4.4e-05	0.633547
ZBTB12	0.0134156	9.68e-09	0.797591	5.61e-06	0.70028
AAMP	-0.000488545	0.372778	-0.155379	0.248325	-0.2
AAR2	-0.00256394	0.194047	-0.224863	0.27408	-0.189636
AARD	0.00501743	0.147483	0.25001	0.240995	0.203081
AARS	0.00285818	0.76742	0.0518402	0.067147	-0.313445
AARS2	0.00401891	0.370808	0.156013	0.978861	-0.00476191
AARSD1	-0.000348264	0.433372	-0.136768	0.0897384	-0.291317
AASDH	0.000724226	0.950235	-0.0109467	0.234459	-0.205882
AASDHPPT	-0.00463395	0.104312	-0.279206	0.120609	-0.267227
SERINC2	0.0134104	1.72e-08	0.789588	9.45e-05	0.621849
AATF	-0.000892692	0.409805	-0.143818	0.445543	-0.132773
AATK	-0.00304603	0.198119	-0.222877	0.121411	-0.266667
ABAT	-0.000268921	0.970312	-0.0065278	0.71586	-0.0635854
HAGHL	0.0134029	4.79e-09	0.806916	1.07e-06	0.747059
DNAH3	0.0133862	9.45e-09	0.797916	5.46e-06	0.685776
UXS1	0.0133727	2.58e-08	0.783739	1.93e-05	0.667787
ABCA2	-0.00498181	0.0852496	-0.295102	0.0427589	-0.345378
MCM2	0.0133634	6.03e-09	0.803917	7.27e-07	0.761345
ABCA4	0.00186865	0.992466	-0.00165632	0.516014	-0.113165
PSD4	0.0133522	8.51e-09	0.799333	5.04e-06	0.703081
RASGEF1A	0.0133241	1.15e-08	0.795201	6.67e-05	0.632493
ABCA7	-0.00623631	0.0479686	-0.336679	0.0826258	-0.297759
MAGEF1	0.013318	2e-08	0.787431	1.46e-05	0.67535
IL4I1	0.0132763	2.38e-08	0.784919	1.44e-05	0.67563
ZNF572	0.0132606	2.04e-08	0.787123	2.25e-05	0.663585
ABCB10	-0.0069339	0.0236299	-0.381779	0.199525	-0.221849
TRAF2	0.0132451	4.49e-08	0.775453	0.000189824	0.59944
ABCB4	0.00256198	0.243261	0.202541	0.152121	0.247059
IKBKE	0.0132354	7.54e-09	0.800962	4.83e-06	0.704202
ABCB6	-0.00091221	0.390369	-0.149808	0.0370818	-0.354902
LEMD1	0.0132034	4.1e-08	0.776832	3.13e-07	0.743339
ABCB8	0.00270561	0.766132	0.0521354	0.383379	-0.151541
SPINT2	0.0131988	2.91e-08	0.781968	3.83e-05	0.648739
ABCC1	-0.00157393	0.4207	-0.140531	0.383379	-0.151541
ABCC10	0.00439395	0.126819	0.263055	0.146487	0.25042
ABCC11	-0.0061368	0.0227603	-0.38401	0.00664442	-0.450266
SORD	0.0131908	1.38e-07	0.757555	3.76e-05	0.6493
GALNT6	0.0131902	4.67e-08	0.77485	1.55e-05	0.673669
SLC35F3	0.013188	3.64e-08	0.778629	0.000109514	0.607294
ABCC5	0.00680412	0.0110314	0.424508	0.0196235	0.394678
CCDC167	0.0131855	2.64e-08	0.783392	0.00217203	0.506443
KRT86	0.013179	3.16e-08	0.780757	7.19e-09	0.801597
PRSS21	0.0131744	6.45e-08	0.769829	4.18e-05	0.646218
ABCD1	-0.00177056	0.290092	-0.18397	0.0856621	-0.294958
CACNA1B	0.0131694	5.14e-08	0.773357	9.71e-05	0.621008
CELF5	0.0131618	1.85e-08	0.788551	0.000159332	0.595777
ABCD4	-0.00363746	0.125758	-0.263766	0.207743	-0.217927
ABCE1	-0.00421184	0.109308	-0.275409	0.144186	-0.251821
ABCF1	0.00231884	0.908069	0.0202523	0.686033	-0.0705882
ABCF2	-0.000470275	0.478398	-0.123859	0.609626	-0.0890756
RBP1	0.0131525	3e-08	0.781541	3.08e-07	0.801681
ABCG1	0.00135446	0.476512	0.124386	0.500458	0.117367
ABCG2	-0.00664881	0.0490681	-0.335133	0.797774	-0.0448179
ABCG4	0.00343423	0.216763	0.214128	0.256492	0.196639
SPINT1	0.0131424	6.08e-08	0.770768	1e-05	0.685154
SAMD10	0.0131119	4.48e-08	0.77548	0.000249571	0.590196
EMX2	0.0131038	2.98e-08	0.781632	5.74e-06	0.69972
LGR6	0.013096	3.29e-08	0.780171	2.67e-06	0.719888
ABHD12B	-0.0017909	0.403873	-0.145628	0.358151	-0.159664
YDJC	0.0130816	6.36e-08	0.770057	5.32e-05	0.639216
ABHD14A	-0.00634763	0.0136112	-0.413238	0.000998172	-0.538936
ABHD14A-ACY1	-0.00158144	0.593334	-0.0934605	0.239678	-0.203641
ABHD14B	-0.00667451	0.00605418	-0.45479	8.56e-05	-0.62493
ARHGAP8	0.0130794	2.37e-07	0.748269	0.000390219	0.57451
C1orf74	0.0130654	1.42e-07	0.757059	2.49e-05	0.660784
ST6GALNAC5	0.0130274	4.11e-08	0.776803	2.96e-06	0.717087
PDE6B	0.0130219	7.41e-08	0.767624	9.89e-05	0.620448
ATG9B	0.0130104	8.44e-08	0.765542	3.5e-06	0.712605
ABHD2	-0.00535316	0.160522	-0.242453	0.926427	-0.0162465
MARVELD3	0.013007	6.86e-08	0.768847	0.000121339	0.614006
ABHD4	0.00301206	0.548939	0.104836	0.854088	0.0322129
RBBP8NL	0.0129956	7.71e-08	0.766996	0.000170141	0.593715
SH2D3A	0.0129791	4.14e-08	0.776696	0.000101591	0.619608
DTNB	0.0129759	2.85e-07	0.745024	0.000923703	0.542017
ABI1	0.00135355	0.463427	0.128076	0.221133	0.211765
ABI2	0.00567548	0.0267511	0.374291	0.00986875	0.433333
ABI3	0.000928365	0.585887	0.0953414	0.5939	0.0929972
FOXP3	0.0129651	2.68e-08	0.783196	1.13e-06	0.745098
MDK	0.0129447	9.34e-08	0.763917	1.82e-06	0.730532
TMEM92	0.0129317	9.2e-08	0.764163	3.12e-06	0.715686
ABLIM1	-0.00609985	0.0126609	-0.417161	0.0353834	-0.357983
ABLIM2	-0.00658615	0.0056337	-0.458249	0.0584779	-0.323529
ZNF774	0.012915	1.48e-07	0.756351	5.44e-07	0.77395
LYPD1	0.0129041	1.25e-07	0.759144	6.8e-05	0.631933
LLGL2	0.0129041	8.36e-08	0.765696	0.000795073	0.547899
RIBC2	0.0128981	7.61e-08	0.767205	8.85e-06	0.674557
ABT1	0.0018557	0.865908	0.0296114	0.932809	0.0148459
MMP7	0.0128915	5.69e-08	0.771796	1.17e-05	0.681232
ABTB2	-0.00464681	0.0989147	-0.283464	0.401375	-0.145938
ACAA1	-0.00699858	0.00475804	-0.466233	0.00155678	-0.520728
RNF183	0.0128849	1.91e-07	0.751997	0.000284542	0.577057
ZNF627	0.0128815	1.19e-08	0.794771	2.88e-07	0.804762
PNMA3	0.0128703	4.93e-08	0.774024	2.44e-05	0.661345
ACAD10	0.00112419	0.907464	-0.0203861	0.246311	-0.20084
C1orf106	0.0128628	9.14e-08	0.764272	0.000418459	0.571989
ACAD8	-0.00551497	0.0417805	-0.345953	0.0694663	-0.310924
ACAD9	-0.00181232	0.181449	-0.231199	0.055796	-0.326891
SKAP1	0.0128626	3.25e-08	0.780353	5.85e-05	0.636415
ABCC4	0.0128348	1.51e-07	0.755938	8.28e-06	0.690196
ZNF710	0.0128341	1.13e-07	0.760816	4.7e-05	0.642857
MGME1	0.0128297	4.96e-07	0.734983	0.00482135	0.469748
SBK1	0.0128256	1.01e-07	0.762679	1.3e-05	0.678431
ACAN	-0.00196642	0.904427	-0.0210583	0.238366	0.204202
ACAP1	0.0022711	0.237363	0.205043	0.31709	0.173669
TFAP2A	0.0128255	1.39e-07	0.757431	0.00249746	0.50028
SLC35D3	0.0128181	1.41e-07	0.757138	2.76e-05	0.646137
HAPLN1	0.0128149	4.98e-07	0.7349	0.000100552	0.609855
ACAT2	0.000851604	0.862781	-0.0303086	0.335593	-0.167227
ACBD3	-0.00442316	0.135121	-0.257638	0.296969	-0.180952
ACBD4	-0.00109931	0.603693	-0.0908613	0.31003	-0.17619
HOPX	0.0128066	3.01e-08	0.781466	1.26e-06	0.741737
FCHO1	0.0128052	1.92e-07	0.751904	5.69e-05	0.637255
FHAD1	0.0128046	1.2e-08	0.794629	2.36e-07	0.813725
ACCS	-0.00479532	0.0851297	-0.295211	0.0875251	-0.293277
ACD	0.000497483	0.801038	-0.0441802	0.285005	-0.185434
ARMC3	0.0128024	5.5e-08	0.77232	4.13e-07	0.738338
ILDR1	0.0127905	7.86e-08	0.766693	4.28e-05	0.634351
NGEF	0.0127858	3.86e-08	0.777766	9.35e-08	0.844818
ETV4	0.0127827	2.39e-07	0.748117	0.000307945	0.582913
ACHE	-0.00286292	0.4032	-0.145835	0.531808	-0.108964
ACIN1	0.000876018	0.738096	-0.0585993	0.280602	-0.187115
ACKR2	-0.00335045	0.157804	-0.243991	0.210735	-0.216527
TMPRSS13	0.0127745	1.47e-07	0.756463	1.95e-06	0.728571
ACKR4	-0.00690061	0.0343861	-0.35862	0.0418822	-0.346779
DNAJC9	0.0127739	2.28e-07	0.748952	0.000103427	0.619048
ACN9	0.00117937	0.666112	0.0755754	0.923875	0.0168067
HMGN1	0.0127719	4.31e-07	0.737588	0.000118173	0.614846
ACO2	-0.00449709	0.0334637	-0.360352	0.000806599	-0.547339
TIGD1	0.0127604	4.52e-08	0.775354	9.63e-07	0.7507
GRM4	0.0127513	9.07e-08	0.764387	2.51e-05	0.648574
ACOT13	-0.00231228	0.241424	-0.203316	0.0204734	-0.392157
EPHB3	0.0127488	2.23e-07	0.749351	6.12e-06	0.698039
ACOT4	-0.0053646	0.0691244	-0.310859	0.00747279	-0.447899
ACOT7	0.00632589	0.0668289	0.31333	0.333958	0.167787
STRA6	0.0127392	8.15e-08	0.766121	1.18e-06	0.743697
OCIAD2	0.0127364	2.52e-07	0.747187	0.000629499	0.556863
FBXO16	0.0127298	6.29e-07	0.730549	2.26e-05	0.651306
NDP	0.0127289	5.58e-07	0.732794	0.000168506	0.594019
IRF6	0.0127166	2.74e-07	0.745684	4.11e-06	0.708403
CCDC74A	0.0127033	1.49e-07	0.756193	5.15e-06	0.702521
ACP2	0.00658106	0.0504114	0.333282	0.324252	0.171148
ACP5	0.0065968	0.00385914	0.475876	0.000114066	0.615966
DCDC2	0.0127031	1.72e-07	0.753769	1.71e-05	0.658449
ACPL2	0.00640015	0.027428	0.372762	0.0211555	0.390196
ACPP	0.00513021	0.128854	0.261703	0.175193	0.234174
NPM3	0.0127024	3.78e-07	0.739969	1.91e-06	0.729132
ACRBP	0.00256876	0.368793	0.156663	0.386048	0.1507
ZNF250	0.012692	8.8e-08	0.764886	1.72e-05	0.670868
ACSF2	-0.00413243	0.0551339	-0.32707	0.00131574	-0.527731
ACSF3	0.00397579	0.436315	0.135902	0.514969	-0.113445
FAM181A	0.0126885	2.73e-07	0.745751	2.22e-05	0.651773
PSRC1	0.0126873	2.95e-07	0.744434	6.97e-06	0.694678
OVOL2	0.0126797	2.59e-07	0.746731	0.000116907	0.605319
ARHGEF19	0.0126786	4.22e-07	0.737941	2.42e-05	0.661625
ACSL6	-0.0046963	0.284379	-0.186126	0.154033	-0.245938
ACSM1	-0.00607528	0.0531532	-0.329622	0.147236	-0.250158
DYDC2	0.0126748	3e-07	0.744106	0.000123997	0.603528
C16orf59	0.0126719	2.67e-07	0.746175	0.000320476	0.581513
ACSS1	0.000387793	0.724709	0.0617124	0.482114	0.122409
PAK6	0.012669	2.75e-07	0.745667	4.48e-05	0.644258
PNOC	0.0126592	7.75e-07	0.726562	0.000620252	0.557423
ACTA1	-0.000790751	0.793461	-0.0458992	0.515825	0.113605
ACTA2	0.00285403	0.300186	0.180228	0.0903786	0.290756
ACTB	-0.000257291	0.700854	-0.0673068	0.682485	-0.0714286
ACTC1	-0.00426326	0.396617	-0.147864	0.861657	0.0305322
ACTG1	0.00418182	0.43189	0.137204	0.967336	0.00728291
ACTG2	-0.00301391	0.44259	-0.134068	0.659003	0.0770308
SULT2B1	0.0126562	1.43e-06	0.714503	0.000772212	0.541936
PVRL4	0.0126553	5.14e-07	0.734309	0.000157473	0.605602
DOK5	0.0126523	3.09e-07	0.743605	4.22e-05	0.645938
ACTN1	0.000109378	0.757043	-0.0542232	0.498402	0.117927
TMED3	0.0126499	2.02e-07	0.751064	1.44e-06	0.737535
ACTN4	-0.00224928	0.167667	-0.238499	0.106834	-0.277311
DNAH14	0.0126492	3.01e-07	0.744065	3.08e-05	0.654902
ACTR1A	-0.00519489	0.0261911	-0.375579	0.0220605	-0.387675
ACTR1B	0.000481844	0.754824	-0.054734	0.179987	-0.231653
ACTR2	-0.00282043	0.490726	-0.120437	0.991672	0.00196078
ACTR3	-0.000627563	0.787585	-0.0472351	0.723083	0.0619048
C1orf210	0.0126483	2.21e-07	0.749502	0.00014456	0.598808
ACTR3C	0.00665865	0.042292	0.345146	0.263434	0.193838
ACTR5	0.00229717	0.701074	0.0672549	0.38694	0.15042
ZNF260	0.0126475	9.73e-08	0.763245	2.84e-05	0.657143
ACTR8	0.000841179	0.510601	0.115013	0.449421	0.131653
ACTRT3	-0.00112484	0.300296	-0.180188	0.0452935	-0.341457
ACVR1	-0.00320061	0.171746	-0.236295	0.0646426	-0.316246
FAM131C	0.0126383	7.55e-07	0.727076	0.000189824	0.59944
TSSC1	0.0126381	1.16e-06	0.71864	0.00680702	0.452661
ACVR2A	-0.00344939	0.17067	-0.236873	0.185423	-0.228852
ACVR2B	0.00427383	0.120615	0.267277	0.116654	0.270028
MEX3A	0.0126285	3.57e-07	0.740991	2.84e-06	0.718207
ACY1	-0.00232886	0.15423	-0.246042	0.0161964	-0.405882
ACYP1	0.00252376	0.309944	0.176686	0.527573	0.110084
EXPH5	0.0126245	1.93e-07	0.751854	3.98e-06	0.709244
ADA	0.000821682	0.991898	-0.00178104	0.556477	-0.102521
CXXC5	0.0126211	1.54e-06	0.713	0.000330826	0.580392
ADAL	-0.00582425	0.0139359	-0.41195	0.00479352	-0.470028
ADAM10	-0.00237024	0.522857	-0.11172	0.992953	-0.00168067
ADAM11	0.00240194	0.295744	0.181865	0.520203	0.112045
ADAM12	0.00411741	0.101233	0.281614	0.0393396	0.35098
IQCC	0.012611	1.17e-06	0.718459	0.00113153	0.533894
ADAM17	-0.00139659	0.589595	-0.0944037	0.990391	0.0022409
ADAM19	0.000554568	0.62919	0.0845436	0.232523	0.206723
COL10A1	0.0125955	1.93e-07	0.751802	4.72e-07	0.780672
HN1	0.0125931	5.4e-07	0.733393	0.000317934	0.581793
TARBP2	0.0125801	9.08e-07	0.723487	0.00202375	0.509524
ADAM32	0.00355122	0.430683	0.137561	0.845273	-0.0341737
GALE	0.0125774	1.72e-06	0.710675	0.00199777	0.510084
CD164L2	0.0125737	3.68e-07	0.740447	0.000317723	0.573364
ADAM9	-0.0063409	0.063066	-0.317528	0.37544	-0.154062
SVOPL	0.0125729	2.29e-07	0.74886	3.31e-06	0.696856
CD22	0.0125707	1.14e-07	0.760648	1.82e-06	0.730532
ADAMTS10	-0.00390771	0.334211	-0.168169	0.934086	-0.0145658
ADAMTS12	-0.0043024	0.101061	-0.28175	0.176781	-0.233333
ADAMTS13	-0.00157533	0.414147	-0.142502	0.841501	-0.035014
CDKN2A	0.0125637	3.31e-07	0.74237	0.00020299	0.597199
FAM90A1	0.0125524	9.38e-07	0.722859	0.000206315	0.587576
ADAMTS16	-0.00566742	0.115278	-0.27104	0.504583	-0.116246
ADAMTS17	-0.00170015	0.584984	-0.0955702	0.625528	-0.0851541
LEF1	0.0125445	8.63e-08	0.7652	1.51e-06	0.736134
ADAMTS19	-0.00143217	0.937729	0.0137026	0.807989	0.0426069
ADAMTS2	-0.00272632	0.432447	-0.13704	0.889512	0.0243697
SMIM22	0.0125437	5.89e-07	0.73177	0.00027941	0.577662
FANCA	0.0125398	6.13e-07	0.731017	8.55e-06	0.689356
RNF43	0.0125274	3.61e-07	0.74078	0.000634169	0.556583
ADAMTS6	-0.000434055	0.767662	0.0517848	0.182691	0.230252
ADAMTS7	-0.0049262	0.0649226	-0.315433	0.27552	-0.189076
ADAMTS8	-0.00546973	0.136649	-0.256669	0.481105	-0.122689
RHNO1	0.0125208	1.53e-07	0.755812	1.51e-06	0.736134
TONSL	0.012517	3.45e-07	0.741588	0.000349659	0.578431
ADAMTSL2	0.00421018	0.17704	0.23349	0.262036	0.194398
PFN2	0.0125165	4.08e-07	0.738576	6.49e-05	0.633333
AIM1L	0.0125125	9.37e-07	0.722881	2.52e-06	0.702718
C5orf49	0.0125125	1.78e-07	0.75316	7.68e-06	0.692157
TTC22	0.0125097	3.74e-07	0.740144	0.000237595	0.591877
ADAP2	0.00123478	0.633174	0.0835659	0.876832	-0.0271709
LAD1	0.0124999	5.6e-07	0.732723	0.000177429	0.601681
APBA2	0.0124965	1.43e-07	0.756948	7.27e-06	0.693557
ADAT1	-0.0056508	0.0382498	-0.351753	0.0375565	-0.354062
ADAT2	0.00426749	0.188156	0.227789	0.214365	0.214846
ADAT3	0.005193	0.174108	0.235036	0.351373	0.161905
ADC	0.0067488	0.00747533	0.444449	0.00381156	0.480952
ADCK1	0.00166061	0.815103	0.041	0.279144	-0.187675
NAGS	0.0124962	2.99e-07	0.744166	6.08e-07	0.768908
ZNF93	0.0124883	1.75e-07	0.753523	4.09e-07	0.787675
ADCK4	0.00124025	0.783805	-0.0480958	0.457233	-0.129412
BCL11A	0.0124851	2.41e-07	0.747978	7.32e-07	0.761064
FANCF	0.0124785	2.35e-07	0.748389	7.2e-06	0.693838
PIGC	0.0124707	9.9e-07	0.721816	0.00062486	0.557143
KRTCAP3	0.0124698	1.02e-06	0.721271	0.00873824	0.439776
ADAM28	0.0124689	1.26e-07	0.758944	5.51e-07	0.773389
COL11A1	0.0124674	1.25e-07	0.759134	1.7e-05	0.671148
CEP72	0.0124658	7.15e-07	0.728105	1.46e-05	0.67535
ADCY7	0.0010529	0.461802	0.128538	0.577253	0.0971989
ADCY8	0.00450986	0.0876182	0.292987	0.449827	0.13197
RHPN1	0.0124632	5.37e-07	0.733514	0.000381191	0.57535
BCAS4	0.0124584	3.66e-07	0.740526	1.26e-06	0.741737
PKM	0.0124551	1.07e-06	0.720364	3.83e-05	0.648739
C11orf82	0.0124464	1.36e-07	0.757701	1.79e-06	0.731092
ADD2	0.00213996	0.376666	0.154135	0.167408	0.238375
LIG1	0.0124443	1.82e-07	0.752802	9.94e-06	0.685434
MMP11	0.0124442	8.48e-07	0.724835	0.000228011	0.593277
PPP1R14C	0.0124439	1.24e-06	0.717273	0.000343272	0.570748
GRHL2	0.0124411	5.44e-07	0.73325	0.000847977	0.538436
AHCY	0.0124401	1.6e-06	0.712207	0.0134236	0.416527
CDT1	0.0124331	3.05e-07	0.7438	0.000156128	0.605882
SOX12	0.0124275	7.38e-07	0.72749	0.000178937	0.601401
KLRG2	0.0124267	7.86e-07	0.726286	0.00051943	0.556355
ADIPOR1	-0.00200931	0.258316	-0.196333	0.0983413	-0.284034
GMNC	0.0124245	7.85e-07	0.72631	0.00716622	0.446545
CDH1	0.0124202	7.09e-07	0.728279	7.12e-05	0.630532
ADK	-0.00629303	0.0140879	-0.411356	0.00145606	-0.523529
PAFAH1B3	0.0124154	8.17e-07	0.725546	7.39e-05	0.629412
PRAME	0.0124106	9.18e-07	0.723285	0.000293152	0.576064
MFSD6L	0.0124091	1.2e-06	0.717998	0.000470024	0.559888
ADNP	0.00537239	0.0978826	0.284299	0.337233	0.166667
KLHL14	0.0124009	5.95e-07	0.73159	0.000653156	0.555462
ADO	-0.0061073	0.0447101	-0.341434	0.179987	-0.231653
LIX1	0.0123955	8.29e-07	0.725265	1.82e-05	0.656923
ADORA2A	-0.00210453	0.797242	-0.0450409	0.987828	-0.00280112
ADORA2B	-0.00543107	0.132016	-0.259635	0.633544	-0.0831933
ADORA3	0.00678867	0.00874118	0.436571	0.0193469	0.395518
ADPGK	-0.00344914	0.240081	-0.203885	0.521252	-0.111765
ZNF695	0.0123928	9.02e-07	0.723619	0.0004595	0.560684
ADPRHL1	0.00373943	0.574164	0.0983237	0.636992	-0.0823529
PROM2	0.0123887	7.92e-07	0.726135	0.00277746	0.495518
ADPRM	-0.00414457	0.20902	-0.217696	0.197219	-0.222969
LRRC8D	0.0123847	2.55e-07	0.746997	6.07e-05	0.635294
ADRA1B	-0.00529416	0.0301134	-0.36699	0.00321938	-0.488796
ADRA1D	-0.00638506	0.0376915	-0.35271	0.149284	-0.248739
CAPG	0.0123827	1.18e-07	0.760091	2.13e-06	0.72605
C1orf186	0.0123795	7.93e-07	0.726125	0.000484133	0.566667
ADRA2C	0.0013954	0.920062	-0.0176012	0.504583	-0.116246
NIPSNAP1	0.0123767	1.01e-06	0.721329	0.000634169	0.556583
GPR39	0.0123686	6.55e-07	0.729766	0.000218775	0.594678
SYT13	0.0123634	1.01e-06	0.721406	0.000542934	0.554777
ADRBK1	0.00389108	0.214505	0.215159	0.252387	0.198319
SYNE4	0.0123617	6.34e-07	0.730404	0.00232977	0.503361
ADRM1	0.00250023	0.811122	0.0418987	0.852827	-0.032493
PYCR1	0.0123546	1.66e-07	0.754417	2.11e-06	0.726331
ADSS	0.00262113	0.488848	0.120955	0.31709	0.173669
BEST4	0.0123411	1.01e-06	0.72146	1.99e-05	0.666947
TMPRSS4	0.0123396	1.66e-06	0.711481	0.000963688	0.540336
AEBP1	0.00649915	0.0175487	0.399102	0.0170841	0.402801
AEBP2	-0.00621789	0.0464812	-0.338817	0.53606	-0.107843
AEN	-0.00602378	0.0289773	-0.369378	0.0547082	-0.328291
AES	-0.000706519	0.471474	-0.1258	0.0979991	-0.284314
ZNF165	0.0123313	1.23e-06	0.717468	0.0010052	0.538655
FARP1	0.0123194	6.77e-07	0.729142	3.29e-06	0.714286
AFAP1L2	0.00519725	0.0379455	0.352273	0.00522592	0.465826
CCDC64B	0.0123136	6.9e-07	0.728785	0.000393679	0.566059
AFF2	-0.00426807	0.0649373	-0.315416	0.00228578	-0.504202
UGT2B7	0.0122999	1.36e-06	0.715494	0.000607274	0.55075
THNSL1	0.0122968	5.55e-06	0.685376	0.000904267	0.542857
AFG3L2	0.00224302	0.865658	0.0296671	0.68485	-0.0708683
AFMID	0.00666844	0.0974803	0.284626	0.285005	0.185434
AFTPH	-0.00179912	0.562264	-0.101379	0.895862	0.0229692
AGA	-0.00458583	0.0986286	-0.283695	0.13179	-0.259664
STMN1	0.0122943	2.09e-06	0.706676	0.000393271	0.57423
AGAP10	-0.00627358	0.0352787	-0.35698	0.0333147	-0.361905
AGAP2	-0.00629754	0.083188	-0.29698	0.10252	-0.280672
AGAP2-AS1	0.000578614	0.962726	0.00819692	0.653182	0.0784314
AGAP3	0.00660052	0.0817202	0.29834	0.764449	0.052381
AGAP4	-0.00516898	0.0560135	-0.32596	0.712258	-0.0644258
AGAP5	-0.00144349	0.628914	-0.0846113	0.44845	-0.131933
AGAP6	-0.00586692	0.0239587	-0.380953	0.0231038	-0.384874
AGAP7	0.00099305	0.91304	0.0191528	0.80078	-0.0442386
AGAP8	-0.00239054	0.42689	-0.138685	0.312372	-0.17535
AGAP9	-0.000314014	0.829861	-0.0376769	0.328274	-0.169748
SMC4	0.0122906	5.38e-07	0.733478	9.33e-07	0.751821
AGBL3	-0.00550096	0.0833105	-0.296868	0.361569	-0.158543
AGBL4	0.00058184	0.831937	-0.0372103	0.488189	-0.120728
AUNIP	0.0122904	7.61e-07	0.726904	6.61e-06	0.681389
AGER	0.00293016	0.349887	0.162868	0.669531	0.0745098
AP3M2	0.012287	3.8e-06	0.693861	0.000399438	0.573669
AGFG2	-0.00632452	0.0175424	-0.399122	0.0298688	-0.368908
AGGF1	-0.00573102	0.04644	-0.338877	0.0612619	-0.320168
AGK	-0.00135828	0.409469	-0.14392	0.366734	-0.156863
AQP5	0.0122829	2.69e-06	0.701323	0.00159876	0.519608
B4GALNT3	0.0122761	3.22e-07	0.742843	7.64e-07	0.759384
CLDN16	0.0122713	1.76e-06	0.710216	0.00108543	0.535574
AGO1	-0.00106699	0.680437	0.0721477	0.950701	0.0109244
AGO2	-0.00548798	0.0433938	-0.343434	0.134811	-0.257703
APOC2	0.0122664	7.17e-08	0.768155	1.04e-08	0.796576
CELSR1	0.0122579	3.92e-07	0.739304	1.52e-06	0.735854
AGPAT1	0.00544417	0.207347	0.218478	0.873034	0.0280112
SRGAP3	0.0122507	4.49e-07	0.736804	1.12e-06	0.745658
AGPAT3	-0.00418816	0.0574823	-0.324137	0.00906989	-0.437815
AGPAT4	-0.00247967	0.523528	-0.111541	0.655508	0.0778711
AGPAT5	0.00346704	0.23161	0.207525	0.0564571	0.32605
AGPAT6	-0.00514353	0.0477583	-0.336978	0.123844	-0.264986
ARMC9	0.0122475	2.33e-07	0.748542	1.04e-06	0.747899
AGPS	-0.00667697	0.0252454	-0.377807	0.0963018	-0.285714
GOT2	0.0122461	4.33e-06	0.69099	0.00197208	0.510644
FOXJ1	0.012243	7.76e-07	0.726525	0.00218598	0.506162
TRAIP	0.0122415	1.33e-06	0.715869	3.02e-05	0.655462
GJB1	0.012238	1.93e-06	0.708377	0.00160696	0.51347
FAM136A	0.0122305	2.85e-06	0.700081	0.000502873	0.565266
TMEM177	0.0122221	1.75e-06	0.710419	0.00157765	0.520168
TFAP4	0.0122196	3.54e-06	0.69542	0.000538239	0.562745
KIF2C	0.0122144	5.76e-07	0.732195	4.77e-06	0.704482
RASAL1	0.0122093	1.62e-06	0.712003	0.000605528	0.550855
SYNDIG1	0.0122069	9.14e-07	0.723361	1.18e-05	0.680952
KIF22	0.012205	2.89e-06	0.699832	0.00164173	0.518487
TJP3	0.0122042	1.03e-06	0.721048	0.00143662	0.52409
DLG3	0.0122038	1.39e-06	0.715032	1.51e-06	0.736134
PPAPDC1A	0.0122031	1.91e-07	0.75196	1.05e-06	0.747619
BSPRY	0.0121974	9.24e-07	0.723156	0.000325614	0.580952
CBX8	0.0121943	1.67e-06	0.711316	0.000208134	0.596359
TMEM139	0.0121782	1.65e-06	0.711534	0.00109299	0.535294
FUT3	0.0121761	1.08e-06	0.720097	0.000288702	0.576574
AHRR	0.00273385	0.47609	0.124504	0.58944	0.0941176
AHSA1	0.00383647	0.52316	0.111639	0.957097	-0.00952381
AHSA2	-0.00534808	0.0615878	-0.319231	0.282798	-0.186275
PKMYT1	0.0121757	1.19e-06	0.718087	5.09e-06	0.702801
AIF1	-0.00437652	0.185195	-0.229284	0.158893	-0.243137
AIF1L	-0.00301349	0.168351	-0.238126	0.0910225	-0.290196
ASF1B	0.0121664	1.24e-06	0.717404	3.24e-05	0.653501
DYRK2	0.0121654	1.59e-07	0.755106	6.84e-07	0.763866
AIFM3	0.00151503	0.591948	0.0938098	0.826449	-0.0383754
SDC1	0.0121602	1.32e-06	0.716095	5.07e-05	0.640616
PTTG1	0.0121567	1.12e-06	0.719291	1.91e-05	0.668067
CCNO	0.0121561	1.02e-06	0.721148	5.53e-05	0.62719
GINS2	0.012156	7.35e-07	0.72759	2.81e-05	0.657423
AIMP1	-0.00633399	0.0141706	-0.411035	0.0438306	-0.343697
AIMP2	0.00430372	0.389394	0.150112	0.769361	0.0512605
AIP	0.00195533	0.668651	0.0749658	0.724289	-0.0616247
RNASEH2A	0.0121551	4.02e-06	0.692593	0.000963688	0.540336
RAB8A	0.0121546	2.81e-06	0.700435	0.000387189	0.57479
AK1	-0.00566484	0.0161253	-0.403873	0.0217553	-0.388515
AK2	0.0032655	0.67354	0.0737946	0.496351	-0.118487
CCDC78	0.0121438	1.24e-06	0.717352	0.000262083	0.588515
KIF26B	0.0121379	1.13e-07	0.760826	4.98e-07	0.778151
AK5	0.00404979	0.16091	0.242235	0.0272073	0.37479
AK7	0.00622135	0.0707155	0.309184	0.143728	0.252101
AK8	0.00651919	0.0496339	0.334349	0.566274	0.1
MTL5	0.0121367	3e-06	0.699	0.000806599	0.547339
DOK7	0.0121316	3.2e-06	0.69758	0.000739607	0.5507
RECQL4	0.0121312	6.58e-07	0.7297	1.89e-05	0.668347
PLEKHG4B	0.0121311	2.21e-06	0.705483	0.000387189	0.57479
RBM38	0.0121189	1.6e-06	0.712172	0.000194669	0.598599
DLX3	0.0121168	1.88e-06	0.708932	5.23e-06	0.686743
SPDEF	0.0121107	5.28e-06	0.686533	0.0022027	0.50042
GGT6	0.0121066	3.32e-06	0.696787	0.00147302	0.516983
TMEM102	0.0121062	1e-06	0.721582	6.97e-06	0.694678
AKAP5	0.00232595	0.267074	0.192831	0.0919948	0.289356
CCR8	0.0120944	2.14e-07	0.750066	1.51e-06	0.713325
GSTO2	0.0120912	2.64e-06	0.70177	0.0022	0.505882
AKAP8	-0.00353947	0.130572	-0.260574	0.326661	-0.170308
ZNF512	0.0120755	1.1e-06	0.719788	1.35e-05	0.677311
PACSIN1	0.0120752	5.09e-06	0.687338	7.95e-05	0.627171
AKIP1	0.000148775	0.88103	0.0262466	0.422663	-0.139496
MND1	0.0120742	1.55e-06	0.712794	5.86e-06	0.69916
WDR34	0.0120738	3.06e-06	0.698596	0.00202375	0.509524
AKNA	-0.00594217	0.137038	-0.256422	0.228046	-0.208683
C12orf56	0.0120735	3.97e-06	0.692913	0.00075173	0.542934
AKR1B1	0.00567067	0.0177739	0.398377	0.0192555	0.395798
AKR1B10	-4.11e-05	0.765557	0.0522673	0.860513	0.0308145
AKR1B15	0.00420669	0.256344	0.197132	0.44845	0.131933
ARMC7	0.0120735	1.99e-06	0.707678	0.00116322	0.532773
ZNF786	0.012073	1.35e-06	0.715672	3.24e-05	0.653501
COL22A1	0.0120698	8.52e-07	0.724733	2.78e-06	0.718768
PARS2	0.0120615	4.43e-06	0.690458	0.000491553	0.566106
AKR7A2	0.00437602	0.372575	0.155444	0.242316	-0.202521
AKR7A3	0.00161197	0.511415	0.114793	0.315512	0.17423
AKT1	-0.00342919	0.184473	-0.229651	0.0281969	-0.372549
AKT1S1	0.000456457	0.551843	-0.10408	0.100763	-0.282073
AKT2	-0.00635917	0.00634802	-0.452493	0.000201301	-0.597479
CENPM	0.0120596	2.42e-06	0.703617	3.72e-05	0.64958
UGT8	0.0120588	2.57e-06	0.702333	0.000502873	0.565266
ZNF525	0.0120571	4.31e-07	0.73758	7.93e-06	0.691317
ALAS1	-0.00571745	0.021393	-0.387666	0.0261285	-0.377311
CLDN10	0.0120505	3.52e-06	0.695552	6.67e-05	0.632493
ALB	0.00636815	0.0612951	0.319572	0.0493229	0.335574
KIF12	0.0120496	1.36e-06	0.715492	6.77e-05	0.621444
ALDH16A1	0.00598193	0.0714029	0.30847	0.567368	-0.0997199
TEC	0.012047	1.36e-06	0.715447	7.04e-06	0.694398
FZD2	0.0120417	2.03e-06	0.707238	6.25e-05	0.634454
PRIM2	0.0120392	1.81e-06	0.709694	0.000286488	0.585434
SOWAHB	0.0120327	9.86e-07	0.72189	0.000386962	0.566652
ALDH1B1	0.00568445	0.104622	0.278966	0.214365	0.214846
PIPOX	0.0120187	2.25e-06	0.705144	2.17e-06	0.72549
ALDH1L2	-0.0038922	0.402125	-0.146165	0.690775	0.0694678
TMEM231	0.0120168	7.57e-06	0.67823	0.013025	0.418207
ALDH3A1	-0.0016802	0.312745	-0.175682	0.144186	-0.251821
HOMER2	0.0120165	2.5e-06	0.702891	6.25e-05	0.634454
ALDH3B1	0.00114785	0.841076	0.0351601	0.838988	0.0355742
CDS1	0.0120152	3.24e-06	0.697335	3.11e-05	0.654622
NAT14	0.0120141	2.35e-06	0.704248	0.000180457	0.60112
ALDH5A1	-0.00141049	0.396766	-0.147818	0.134811	-0.257703
C2orf82	0.0120132	7.87e-06	0.677309	0.00113938	0.533613
ALDH7A1	0.00385487	0.402084	0.146178	0.889512	0.0243697
LYPD6B	0.012013	2.33e-06	0.704412	0.00109549	0.528662
HIST1H2BG	0.0120117	4.83e-06	0.688513	5.43e-06	0.685888
ALDOA	0.00227959	0.978537	0.00471885	0.210135	-0.216807
C1orf172	0.0120078	5.54e-06	0.685428	0.0151221	0.407452
ESPN	0.0120069	4.89e-06	0.688234	0.000884542	0.536845
ALG10	0.00334437	0.193712	0.225027	0.216809	0.213725
ALG10B	0.00221596	0.337436	0.167066	0.235107	0.205602
ALDH3B2	0.0120056	7.78e-06	0.677571	0.00143662	0.52409
ALG12	-0.00398772	0.0951308	-0.286557	0.00399729	-0.478711
NEK2	0.0119987	1.03e-06	0.721037	1.13e-05	0.682073
SST	0.0119982	5.64e-06	0.685012	0.00694908	0.448065
CBLC	0.0119981	4.49e-06	0.690155	0.00895388	0.435344
SPAG17	0.0119975	1.22e-06	0.717751	3.83e-05	0.648739
METTL18	0.0119972	1.39e-06	0.715024	0.000270734	0.587395
ALG5	-0.00270022	0.13531	-0.257518	0.0422311	-0.346218
ALG6	0.000804593	0.856056	0.0318091	0.484134	-0.121849
ALG8	0.00580401	0.20955	0.217449	0.405949	-0.144538
B3GNT3	0.0119892	2.9e-06	0.699728	0.00023565	0.592157
ALK	0.00473041	0.0489608	0.335283	0.149284	0.248739
ALKBH1	0.000679889	0.904141	-0.0211216	0.812704	-0.0414566
ALKBH2	0.00477565	0.250892	0.199363	0.378956	0.152941
ALKBH3	0.00283668	0.683812	0.0713438	0.542468	-0.106162
KCNN4	0.0119877	1.17e-06	0.718429	7.76e-06	0.691877
ALKBH5	-0.00673722	0.0216803	-0.386882	0.0569012	-0.32549
ALKBH6	0.00664585	0.0484208	0.33604	0.348851	0.162745
ALKBH7	0.00371251	0.281075	0.187385	0.948143	0.0114846
ALKBH8	-0.00397324	0.26893	-0.192098	0.430215	-0.137255
ALMS1	0.00241546	0.318953	0.173477	0.371943	0.155182
SMG9	0.0119768	1.32e-05	0.664899	0.00359	0.483754
ALOX15B	0.00429199	0.0663688	0.313833	0.0170841	0.402801
ALOX5	0.00218813	0.458677	0.129429	0.361569	0.158543
ALOX5AP	-0.0050354	0.0479554	-0.336698	0.0170841	-0.402801
ALPK1	-0.00470054	0.0581589	-0.32331	0.0313468	-0.365826
NUPR1L	0.0119757	2.02e-06	0.707399	0.00216139	0.501218
CAPN13	0.0119706	3.21e-06	0.69757	0.000126493	0.602919
ALPL	0.00477735	0.21551	0.2147	0.869239	0.0288515
DIRAS2	0.0119668	2.05e-06	0.707057	3.3e-07	0.742413
VANGL2	0.011965	2.86e-06	0.700028	0.000206407	0.596639
ALS2	-0.00671471	0.0093433	-0.433161	0.00906989	-0.437815
ALS2CL	-0.00432357	0.0568484	-0.324919	0.104301	-0.279272
ALS2CR11	-8.45e-05	0.902415	-0.0215037	0.388378	-0.150431
ALS2CR12	-0.0061264	0.0192852	-0.393702	0.0305333	-0.367507
CARD9	0.0119553	1.79e-06	0.709863	0.00158817	0.519888
ALYREF	0.00595042	0.149599	0.248751	0.578356	0.0969188
AMACR	0.00149046	0.737548	0.0587265	0.516014	-0.113165
AMBRA1	0.00520679	0.233246	0.206815	0.252387	0.198319
PKP3	0.0119523	3.12e-06	0.698164	0.00281214	0.494958
AMDHD1	-0.000110397	0.786757	0.0474235	0.587216	-0.0946779
AMDHD2	0.00297602	0.433496	0.136731	0.482114	-0.122409
AMER1	0.00535882	0.0390501	0.350402	0.0344842	0.359664
AMFR	-0.00544508	0.0287275	-0.369914	0.0192555	-0.395798
AMH	-0.00171099	0.563024	-0.101183	0.332328	-0.168347
THOC3	0.0119499	6.05e-06	0.68343	0.000378223	0.57563
AMICA1	-0.00397033	0.344144	-0.164793	0.575049	-0.0977591
MAPK13	0.0119378	2.03e-06	0.707312	7.53e-05	0.628852
DNAJB13	0.0119333	2.74e-06	0.70094	0.00459056	0.467903
AMIGO3	-0.00100052	0.876387	0.0272787	0.764435	-0.0525247
AMMECR1	0.000652715	0.973899	0.00573877	0.822695	-0.0392157
RMI2	0.0119328	1.62e-06	0.711965	8.02e-06	0.691036
AMN	0.00305473	0.473723	0.125168	0.646223	0.080112
AMN1	0.0048414	0.112168	0.273295	0.0796743	0.30056
SLC37A4	0.011932	4.8e-06	0.688653	0.00365525	0.482913
LSM2	0.0119283	9.46e-06	0.672956	0.00431595	0.47507
MRPL48	0.0119271	9.56e-06	0.672715	0.0301331	0.368347
AMPD1	-0.0010711	0.991571	-0.00185291	0.530997	0.109555
AMPD2	0.00497183	0.238796	0.204432	0.581671	0.0960784
AMPD3	0.00507205	0.0379835	0.352208	0.0969779	0.285154
AMPH	-0.0067333	0.0648404	-0.315524	0.373689	-0.154622
AMT	-0.00147646	0.55908	-0.102202	0.8015	-0.0439776
GMDS	0.0119209	9.19e-06	0.673653	0.00543901	0.463866
GJB3	0.0119208	3.46e-06	0.695935	0.00180397	0.508744
PAQR4	0.0119144	4.4e-06	0.690588	0.00291846	0.493277
AMY2B	-0.0060782	0.0163198	-0.4032	0.0111222	-0.426891
AMZ2	-0.00395135	0.0803841	-0.299593	0.0142519	-0.413165
ANAPC1	0.00508523	0.134884	0.257789	0.980142	-0.00448179
CEP85	0.0119029	6.62e-06	0.681341	0.000216968	0.594958
ANAPC11	0.00553356	0.222714	0.211446	0.587216	-0.0946779
SOWAHD	0.0118952	4.66e-07	0.736133	9.62e-06	0.686275
TICRR	0.011883	1.25e-06	0.717203	5.32e-06	0.701681
PATZ1	0.0118826	1.48e-05	0.661983	0.0481432	0.337255
ANAPC2	-0.00425258	0.0867146	-0.293789	0.0373977	-0.354342
GALNT3	0.0118802	4.01e-06	0.69268	0.00137966	0.52577
ANAPC5	0.000113272	0.864526	-0.0299194	0.674231	-0.0733894
ANAPC7	0.00691094	0.0486398	0.335732	0.451367	0.131092
FSTL4	0.0118736	6.51e-06	0.681732	5.24e-05	0.628732
ANGEL1	-0.00101548	0.806719	-0.042894	0.249674	0.19944
ZNF860	0.0118695	1.1e-06	0.719649	3.15e-06	0.715406
GYLTL1B	0.0118692	3.37e-06	0.696506	0.000307945	0.582913
AZI1	0.0118659	5.64e-06	0.685004	0.0141813	0.413445
KCNT1	0.0118644	2.82e-05	0.645511	0.0166757	0.404202
RTP4	0.0118625	6.57e-06	0.681507	0.0011875	0.531933
F2RL1	0.0118594	5.04e-06	0.687584	0.000336112	0.579832
LRRC61	0.0118569	5.6e-06	0.685196	0.0128295	0.419048
CCHCR1	0.0118563	5.16e-06	0.687028	0.00534678	0.464706
ANGPTL6	0.00392394	0.103632	0.279733	0.0197165	0.394398
ORC1	0.0118512	1.03e-06	0.720946	2.01e-05	0.666667
STARD10	0.0118442	2.82e-06	0.70037	0.00101227	0.538375
CASP2	0.0118412	2.11e-06	0.706518	0.000213395	0.595518
ANK3	0.00168662	0.701474	0.0671606	0.960936	-0.00868347
ACBD7	0.0118375	4.51e-06	0.690071	2.84e-05	0.657143
NDC80	0.0118368	1.88e-06	0.708858	3.29e-06	0.714286
ANKEF1	-0.000313697	0.577171	-0.097556	0.354752	-0.160784
ANKFN1	0.00504102	0.0484806	0.335956	0.203735	0.220183
ZNF385C	0.0118354	8.89e-06	0.674448	0.00629781	0.456583
ANKH	-0.000770843	0.751871	-0.0554145	0.337233	0.166667
ANKHD1	-0.00556833	0.0429391	-0.344137	0.211941	-0.215966
ANKHD1-EIF4EBP3	-0.00218811	0.207898	-0.21822	0.0233173	-0.384314
KRT80	0.0118345	4.86e-06	0.688375	0.000526212	0.563585
PTK6	0.0118337	4.5e-06	0.690097	0.000141998	0.608964
ANKLE2	-0.00511712	0.0424371	-0.344919	0.0333147	-0.361905
ANKMY1	0.00616316	0.0325234	0.362158	0.264135	0.193557
ANKMY2	-0.00561242	0.116302	-0.270308	0.259254	-0.195518
CHTF18	0.0118327	4.23e-06	0.691489	0.000247538	0.590476
ANKRD1	0.00421283	0.153057	0.246722	0.0500979	0.33371
CLDN6	0.0118317	1.01e-05	0.671398	0.00783898	0.442076
2003-09-01	0.0118314	6.56e-07	0.729752	8.19e-06	0.690476
CCDC8	0.0118293	4.11e-06	0.692125	1.72e-05	0.670868
ANKRD13A	0.000544216	0.640945	0.0816663	0.010895	0.428011
KIFC1	0.0118267	1.95e-06	0.708149	1.08e-05	0.683193
NUP210	0.0118265	6.47e-07	0.729999	1.87e-05	0.668627
ANKRD13D	0.00409701	0.288477	0.184577	0.837732	0.0358543
ANKRD16	0.00437519	0.132825	0.259111	0.465118	0.127171
ANKRD17	-0.0056764	0.0561253	-0.32582	0.0534253	-0.329972
MCM5	0.0118252	2.84e-06	0.700182	0.00031541	0.582073
PTPRU	0.0118241	1.02e-05	0.671071	0.00249746	0.50028
HIST2H4A	0.0118227	8.94e-06	0.674308	0.028449	0.371989
PEX11B	0.0118211	4.37e-06	0.690752	0.000152154	0.606723
ANKRD22	0.00426062	0.102281	0.280788	0.268367	0.191877
ANKRD23	0.00150674	0.469997	0.126216	0.598375	0.0918768
MYCL	0.0118201	2.45e-06	0.703304	2.96e-06	0.717087
ANKRD26	-0.00663787	0.0421664	-0.345344	0.0497213	-0.335014
ANKRD27	0.00243484	0.802439	0.0438628	0.410553	-0.143137
ANKRD28	-0.00322871	0.468507	-0.126637	0.620967	0.0862745
PAX8	0.0118185	6.23e-06	0.682729	0.00595456	0.459384
ZNF726	0.0118151	3.32e-06	0.696838	2.17e-06	0.72549
ANKRD31	-0.00144376	0.384407	-0.151679	0.149284	-0.248739
ANKRD32	-0.00104177	0.813954	0.0412592	0.960936	-0.00868347
LIMK1	0.0118122	7.48e-07	0.727253	4.38e-06	0.706723
ANKRD34A	0.00396283	0.18688	0.228431	0.293948	0.182073
CDCA4	0.0118066	4.97e-06	0.687868	1.62e-06	0.733894
ANKRD36	-0.00695699	0.0321754	-0.362837	0.144186	-0.251821
ANKRD36C	-0.00524874	0.166645	-0.239057	0.911129	-0.0196078
ASCL2	0.0118057	8.73e-07	0.724257	4.93e-06	0.703641
VWDE	0.0118043	2.36e-06	0.704171	0.000471944	0.559745
PDRG1	0.011804	2.2e-05	0.652082	0.00183592	0.513725
ACTL10	0.0118035	9.7e-06	0.672371	0.00177681	0.515126
ANKRD44	-0.0048548	0.414038	-0.142535	0.626671	-0.084874
STXBP2	0.0118035	3.47e-06	0.695829	0.000638869	0.556303
LRRC55	0.0118027	5.39e-06	0.686042	0.00279475	0.495238
ANKRD49	-0.000667497	0.807485	0.0427208	0.528631	0.109804
ANKRD50	-0.00656575	0.0922725	-0.288956	0.763223	-0.0526611
ANKRD52	-0.00108	0.797782	-0.0449183	0.773051	-0.0504202
SMYD3	0.0118021	1.43e-05	0.662994	0.00426553	0.47563
ANKRD54	0.00134343	0.882016	-0.0260276	0.265541	-0.192997
ANKRD6	0.00633214	0.0265287	0.3748	0.00692064	0.451821
CHMP4C	0.0118007	9.25e-06	0.673503	0.00763735	0.446779
MRGBP	0.0117995	4.75e-06	0.68892	0.00293652	0.492997
ESRP1	0.0117969	4.68e-06	0.689251	0.00154644	0.521008
ANKS1B	-0.00520203	0.0619658	-0.318793	0.623246	-0.0857143
ANKS3	0.00457573	0.223443	0.21112	0.849048	0.0333333
ANKS6	0.00455756	0.270403	0.191519	0.859132	-0.0310924
EPHX4	0.0117933	1.25e-05	0.666148	0.000139556	0.609524
ANLN	0.00681371	0.0159435	0.404507	0.0136267	0.415686
SERPINB5	0.011792	6.18e-06	0.682937	0.00013623	0.600643
RPL39L	0.0117878	1.39e-05	0.663695	0.0596253	0.322129
PAK1	0.0117863	9.87e-06	0.671954	0.00149564	0.522409
NCAPH	0.011782	1.3e-06	0.716412	7.51e-06	0.692717
ANO4	-0.00554494	0.05579	-0.326241	0.25375	-0.197759
MCM4	0.0117774	2.98e-06	0.699134	0.000146997	0.607843
ZNF48	0.0117763	5.63e-06	0.685062	0.000216968	0.594958
AGMAT	0.0117721	2.11e-06	0.70649	1.08e-05	0.683193
RGS10	0.0117696	1.51e-06	0.7134	2.3e-05	0.663025
FAM171A2	0.0117689	5.77e-06	0.684506	3.05e-05	0.655182
SRD5A1	0.0117637	5.67e-06	0.684894	4.2e-06	0.707843
ANP32B	-0.000510273	0.490762	-0.120427	0.244308	-0.201681
ANP32E	0.00382767	0.157424	0.244207	0.0636619	0.317367
ANPEP	-0.00378042	0.130548	-0.26059	0.276966	-0.188515
ANTXR1	0.0033738	0.140186	0.254453	0.00227129	0.504482
PRSS22	0.0117633	7.61e-06	0.678107	0.000173562	0.593087
HES2	0.0117621	3.5e-06	0.695668	6.53e-06	0.696359
ANXA11	0.00166374	0.982741	-0.00379435	0.516014	-0.113165
ANXA13	0.00523155	0.0323834	0.362431	0.0189832	0.396639
ANXA2	-0.00418886	0.0801367	-0.299827	0.17625	-0.233613
ANXA2R	-0.00534109	0.181594	-0.231124	0.73154	-0.059944
FGFR2	0.0117515	6.5e-06	0.681753	0.000783694	0.548459
ANXA4	-0.00225447	0.791902	-0.0462533	0.86292	0.0302521
RPS3	0.0117489	7.25e-06	0.679243	0.00337975	0.486555
SLC44A4	0.0117484	1.31e-05	0.66511	0.000687602	0.553501
EHMT2	0.0117467	1.01e-05	0.671454	0.00441834	0.47395
AMY1B	0.0117456	4.81e-06	0.688606	0.000696655	0.545743
CCNB1	0.0117446	6.59e-06	0.681448	4.74e-05	0.642577
BUB1	0.0117446	2.76e-06	0.700761	2.81e-05	0.657423
ANXA9	0.00225361	0.750114	0.0558197	0.794053	-0.0456583
AOAH	0.00242794	0.190721	0.226507	0.0668932	0.313725
FOXQ1	0.0117445	6.95e-06	0.680218	0.00125523	0.523345
SPDL1	0.011744	5.91e-06	0.683933	0.000154793	0.606162
VAMP8	0.0117422	1.21e-05	0.667043	0.00123741	0.530252
CYB561	0.0117421	1.35e-05	0.664277	0.00352576	0.484594
AP1AR	-0.00543816	0.0683878	-0.311645	0.255119	-0.197199
AP1B1	0.00165296	0.684119	0.0712708	0.74246	-0.057423
AP1G1	-0.00464407	0.0727391	-0.307096	0.0179265	-0.4
CELSR2	0.0117402	5.65e-06	0.684997	0.0050201	0.467787
SHMT2	0.0117391	1.14e-05	0.668509	0.0135587	0.415966
SALL4	0.0117378	2.41e-06	0.703641	7.16e-06	0.679539
BORA	0.0117369	3.49e-06	0.695735	0.000266377	0.587955
AP1S2	-0.00589372	0.127036	-0.26291	0.263434	-0.193838
AP1S3	-0.00128494	0.775262	-0.0500453	0.968616	0.0070028
AP2A1	0.000704131	0.714279	-0.0641508	0.165882	-0.239216
CDC20	0.0117338	2.88e-06	0.699897	1.8e-05	0.669748
AURKA	0.0117338	3.47e-06	0.695849	6.6e-06	0.696078
RHOV	0.0117309	1.26e-05	0.666027	0.00850931	0.437938
AP2S1	0.00499511	0.329461	0.169805	0.826449	0.0383754
AP3B1	-0.00630637	0.030191	-0.36683	0.0422311	-0.346218
AP3B2	0.00640039	0.0446373	0.341544	0.0487302	0.336415
AP3D1	-0.00270348	0.19852	-0.222683	0.0681701	-0.312325
AP3M1	-0.00642396	0.0156781	-0.405444	0.00162012	-0.519048
TMEM9	0.0117264	1.77e-05	0.657641	0.0115297	0.42493
C10orf35	0.0117259	1.27e-05	0.66592	0.0287029	0.371429
AP3S2	-0.00616094	0.0166454	-0.40209	0.000160194	-0.605042
PLEKHB1	0.0117191	1.07e-05	0.670075	0.000473189	0.567507
ZNF766	0.0117164	4.27e-06	0.691281	0.000534203	0.563025
NFE2L3	0.0117128	2.86e-06	0.700013	2.28e-05	0.663305
AP4S1	-0.00439884	0.326601	-0.170797	0.55431	-0.103081
ZNF280B	0.011711	1.79e-06	0.70986	1.28e-05	0.678711
AP5M1	-0.00251512	0.476087	-0.124505	0.605115	-0.0901961
BAK1	0.0117101	2.16e-05	0.652514	0.00286487	0.494118
AP5Z1	0.0053803	0.154184	0.246068	0.662505	0.0761905
FBXW9	0.0117073	6.92e-06	0.680313	0.00507817	0.467227
ABHD17C	0.011707	1.35e-05	0.66439	0.000171508	0.602801
TMEM125	0.0116993	4.54e-06	0.689913	0.00130683	0.528011
APBA3	0.00414543	0.277625	0.18871	0.66017	0.0767507
TACSTD2	0.0116912	9.86e-06	0.671981	0.000518328	0.564146
TACC3	0.011691	4.72e-06	0.689046	0.00167462	0.517647
PNKD	0.0116897	3.13e-05	0.642753	0.0123204	0.421289
APBB3	-0.00280586	0.220491	-0.212442	0.154996	-0.245378
KLK6	0.0116893	8.59e-06	0.675264	0.00810607	0.443697
CNNM4	0.0116758	1.84e-05	0.656624	0.000526212	0.563585
APCDD1L	-0.00389313	0.209861	-0.217304	0.394119	-0.148179
POLD1	0.0116699	5.99e-06	0.683628	0.00101938	0.538095
CNGB1	0.0116686	9.47e-06	0.672944	4.36e-05	0.633833
HJURP	0.0116682	3.14e-06	0.698041	4.65e-05	0.643137
CDCA5	0.0116679	5.71e-06	0.684725	6.43e-05	0.633613
CCDC114	0.0116644	2.25e-06	0.705167	0.000175931	0.601961
API5	-0.00205533	0.431024	-0.13746	0.513926	-0.113725
RTKN	0.0116626	2.97e-05	0.644197	0.00941229	0.435854
DAPL1	0.0116576	1.66e-05	0.659164	0.00359	0.483754
APLF	-0.00521833	0.0694608	-0.310502	0.0378756	-0.353501
APLN	0.000648496	0.824302	0.0389269	0.791574	0.0462185
APLNR	-0.00606066	0.0520005	-0.331142	0.0458522	-0.340616
APLP1	0.00411419	0.229294	0.208536	0.309251	0.176471
SGPL1	0.0116551	1.01e-05	0.671321	0.000778059	0.548739
APH1A	0.0116548	2.49e-05	0.648792	0.00976571	0.433894
PNMAL1	0.0116516	8.93e-06	0.674332	9.8e-05	0.620728
C20orf85	0.0116501	1.9e-06	0.708634	2.25e-05	0.651497
CHST1	0.0116415	3.73e-06	0.694288	3.14e-05	0.654342
APOBEC3A	-0.00643393	0.0192189	-0.3939	0.0194388	-0.395238
APOBEC3B	0.00560738	0.0672295	0.312894	0.0754028	0.304762
APOBEC3C	0.00476909	0.0658038	0.314455	0.106469	0.277591
CDC42BPG	0.0116398	7.17e-06	0.67949	0.00211705	0.507563
BUB1B	0.011636	3.21e-06	0.697568	8.64e-06	0.689076
GID8	0.0116352	8.45e-06	0.675651	0.000878916	0.543978
APOBEC3H	0.00564154	0.0388949	0.350662	0.138772	0.255182
APOBR	0.00162476	0.580054	0.0968218	0.570654	0.0988796
RTN4R	0.0116347	5.59e-06	0.685237	0.000761368	0.54958
RAB25	0.0116302	4.34e-06	0.690916	0.000910466	0.535752
CNKSR1	0.0116289	1.41e-05	0.663244	0.00147573	0.522969
APOE	0.00352827	0.082698	0.297432	0.171009	0.236415
APOL1	0.00156043	0.838735	0.0356849	0.293196	-0.182353
APOL2	-0.0010542	0.414077	-0.142523	0.142364	-0.252941
ZNF16	0.0116282	1.17e-05	0.667877	0.000554655	0.561625
SLC5A1	0.0116267	1.75e-05	0.657902	0.00100585	0.531953
CARD11	0.0116251	2.66e-06	0.701575	6.13e-05	0.635014
RAD51	0.0116207	8.94e-06	0.674305	0.000830095	0.546218
APOM	-0.00411498	0.0990487	-0.283357	0.0165146	-0.404762
APOO	0.00571216	0.165293	0.239799	0.659003	0.0770308
ITGB6	0.0116201	4.94e-06	0.68801	0.0023446	0.503081
APOPT1	-0.000658527	0.490817	-0.120412	0.047755	-0.337815
APP	-0.00284595	0.279545	-0.187971	0.540327	-0.106723
YIPF2	0.0116172	1.09e-05	0.669452	0.000657981	0.555182
F12	0.0116138	2.59e-05	0.647809	0.0396711	0.35042
B3GALT5	0.0116119	9.46e-06	0.672949	0.000160343	0.595579
APRT	0.00659816	0.0862495	0.294204	0.583886	-0.0955182
APTX	0.000195756	0.619648	-0.0868952	0.40963	-0.143417
HIST3H2A	0.011611	5.74e-06	0.684637	8.19e-06	0.690476
AQP11	-0.00424594	0.0567402	-0.325054	0.00241997	-0.501681
AQP3	0.000252569	0.936947	-0.0138749	0.78786	0.0470588
EHF	0.0116104	6.9e-06	0.680398	0.000172971	0.602521
AQP6	0.0025257	0.467631	0.126884	0.971177	0.00644258
SDHAF1	0.0116067	1.46e-05	0.66239	0.00636848	0.456022
C15orf27	0.0116029	1.68e-06	0.711196	1.11e-06	0.745938
BCL9	0.0116	6.77e-06	0.680812	0.000140772	0.609244
AR	0.000836343	0.929997	0.0154079	0.584995	-0.0952381
ARAF	0.000142609	0.539704	-0.107255	0.0497213	-0.335014
S100A14	0.0115958	1.1e-05	0.669251	0.0060558	0.458543
PRRT3	0.0115936	7.07e-06	0.679805	8.4e-05	0.62549
LMO7	0.0115861	3.91e-06	0.69324	3.02e-05	0.655462
GINS1	0.0115827	3.42e-06	0.696185	2.65e-05	0.659104
ARCN1	-0.00556343	0.022959	-0.383494	0.0250857	-0.379832
FXYD3	0.0115815	1.22e-05	0.666842	0.00257712	0.49888
AREGB	-0.00322643	0.3024	-0.179418	0.298568	-0.180823
AREL1	0.00559653	0.0525098	0.330467	0.0361473	0.356583
ARF1	0.00182904	0.891079	-0.0240159	0.527573	-0.110084
ARF3	0.0061631	0.103696	0.279682	0.505617	0.115966
ARF4	-0.00437539	0.125499	-0.26394	0.141009	-0.253782
ARF5	0.00572867	0.0918429	0.289321	0.154033	0.245938
ARF6	-0.000659505	0.669351	-0.0747978	0.795293	-0.0453782
GPR173	0.0115813	1.48e-05	0.66212	0.000193042	0.59888
ARFGAP2	0.00319353	0.672318	0.0740871	0.389623	-0.14958
SGOL1	0.011573	4.98e-06	0.687829	1.62e-05	0.672549
ARFGEF1	0.00238073	0.489626	0.120741	0.774282	0.0501401
CLEC18B	0.0115676	2.27e-05	0.65126	0.000386912	0.566657
ARFIP1	-0.00347261	0.182559	-0.230629	0.0497213	-0.335014
ARFIP2	0.00195202	0.789866	0.0467162	0.932809	-0.0148459
ARFRP1	9.04e-05	0.680325	-0.0721742	0.182691	-0.230252
KIF11	0.0115641	4e-06	0.69273	1.59e-06	0.734454
NXNL2	0.0115639	1.11e-05	0.66903	0.000584457	0.559664
CCNB2	0.0115633	7.75e-06	0.677673	2.14e-05	0.664986
ARHGAP1	-0.00394855	0.127622	-0.26252	0.412403	-0.142577
LSR	0.0115626	2.67e-05	0.647034	0.0137636	0.415126
WDR91	0.0115621	5.49e-06	0.685615	0.000175931	0.601961
ARHGAP11B	0.00623205	0.0411476	0.346963	0.266952	0.192437
ARHGAP12	-0.00395092	0.263396	-0.194292	0.235107	-0.205602
ARHGAP15	-0.00391233	0.400152	-0.146772	0.856609	0.0316527
GLDC	0.0115598	1.28e-05	0.665643	0.00151578	0.521849
C9orf152	0.0115587	6.51e-06	0.681714	0.00159333	0.513816
ARHGAP19	-0.00489604	0.278156	-0.188506	0.392317	-0.148739
ARHGAP19-SLIT1	-0.00544588	0.106151	-0.277792	0.307086	-0.177716
PODNL1	0.0115569	1.03e-06	0.721052	6.39e-06	0.696919
MYBL2	0.0115544	5.35e-06	0.686213	6.07e-05	0.635294
ARHGAP22	0.00470069	0.0962675	0.285618	0.0773732	0.302801
ARHGAP23	-0.0069515	0.00963555	-0.431572	0.0591642	-0.322689
TTK	0.0115508	3.47e-06	0.69588	3.27e-05	0.653221
ARHGAP25	-0.000727289	0.70452	0.0664429	0.844015	0.0344538
ARHGAP26	-0.00156838	0.442951	-0.133963	0.639295	-0.0817927
ARHGAP27	-0.000570781	0.747428	-0.0564397	0.625528	-0.0851541
ING4	0.0115499	1.01e-05	0.671362	0.0002299	0.592997
ABHD11	0.0115474	2.04e-05	0.654024	0.00232977	0.503361
ARHGAP30	-0.00108698	0.85698	0.0316028	0.842758	-0.0347339
AURKB	0.0115392	4.26e-06	0.69134	1.31e-05	0.678151
TPRN	0.011537	1.81e-05	0.657056	0.00680702	0.452661
ARHGAP33	0.00306333	0.365852	0.157615	0.321853	0.171989
ARHGAP35	-0.00644317	0.0163104	-0.403233	0.0759617	-0.304202
RFC4	0.0115354	1.56e-05	0.660744	0.0264841	0.376471
ARHGAP4	0.00434535	0.141902	0.253393	0.476078	0.12409
ARHGAP40	0.00620304	0.0514335	0.331899	0.133529	0.258657
C15orf48	0.0115271	9.19e-06	0.673657	3.51e-05	0.651261
TMEM238	0.0115238	8.83e-06	0.6746	0.00222827	0.505322
XRCC2	0.0115227	4.42e-06	0.690529	3.54e-05	0.65098
RSPO4	0.0115173	1.19e-05	0.667353	0.00426553	0.47563
FAM110A	0.0115145	2.23e-05	0.651647	0.0445572	0.342577
ARHGAP9	-0.00256893	0.583175	-0.0960288	0.805231	-0.0431373
ARHGDIA	-0.000998653	0.360765	-0.159274	0.101112	-0.281793
ARHGDIB	-0.00168481	0.746304	-0.0566996	0.724289	-0.0616247
ARHGDIG	-0.00593264	0.0146054	-0.409374	0.00751364	-0.447619
ARHGEF1	-0.00341571	0.278118	-0.18852	0.337233	-0.166667
ACSM3	0.0115112	6.89e-06	0.680428	2.96e-05	0.656022
ARHGEF10L	-0.00504702	0.103639	-0.279727	0.135684	-0.257143
DCAF7	0.0115069	2.29e-06	0.704804	6.43e-05	0.633613
SUSD4	0.0115061	7.05e-06	0.679887	0.000402553	0.573389
SLC50A1	0.0115058	4.66e-05	0.632002	0.0344842	0.359664
ARHGEF16	0.00600643	0.113877	0.27205	0.597255	0.0921569
ARHGEF17	-0.00318049	0.138091	-0.25576	0.197219	-0.222969
ARHGEF18	0.00649678	0.010822	0.425517	0.0143229	0.412885
MFAP2	0.0115054	4.92e-06	0.688103	9.62e-06	0.686275
ARHGEF2	0.00191362	0.855114	0.0320196	0.987828	-0.00280112
ARHGEF25	-0.00597362	0.100124	-0.282495	0.953259	0.0103641
MTBP	0.0115048	3.41e-06	0.69623	0.000281905	0.585994
MYB	0.0115046	8.21e-06	0.676331	0.000143233	0.608683
ARHGEF3	-0.00502935	0.0590486	-0.322234	0.0121958	-0.421849
ARHGEF33	-0.00259851	0.477695	-0.124055	0.897133	0.0226891
ARHGEF35	0.00508871	0.15753	0.244147	0.421725	0.139776
NCAPG	0.0115034	6.08e-06	0.683292	8.93e-06	0.688235
DPP3	0.0115026	3.77e-05	0.637797	0.0100251	0.432493
CHEK2	0.0115024	1.93e-05	0.655432	0.00257712	0.49888
CTSV	0.0115014	1.46e-05	0.662372	4.35e-05	0.645098
ARHGEF5	0.0041976	0.319867	0.173154	0.477081	0.12381
ZNF564	0.0115004	3.71e-06	0.694384	4.43e-05	0.644538
GOLT1A	0.0114988	1.84e-05	0.656555	0.0171872	0.400282
ARHGEF9	-0.00365545	0.361198	-0.159132	0.615286	0.0876751
ARID1A	0.00113809	0.936266	0.0140251	0.983985	0.00364146
GCNT3	0.0114978	2.01e-05	0.654408	8.53e-06	0.67543
ARID2	0.000121905	0.903846	0.0211868	0.619829	0.0865546
ARID3A	-0.00398109	0.261483	-0.195057	0.300773	-0.179552
ARID3B	-0.000955761	0.806094	0.0430355	0.631249	0.0837535
STRBP	0.0114969	4.77e-06	0.688824	0.00390346	0.479832
ARID4B	-0.00637734	0.0317747	-0.363627	0.0782299	-0.301961
LDB1	0.0114902	1.3e-05	0.66531	0.000534203	0.563025
TRIP13	0.0114887	1.39e-05	0.663633	0.000305492	0.583193
SDSL	0.0114834	1.65e-05	0.659319	0.000295854	0.584314
ABRACL	0.0114814	8.59e-06	0.675241	2.52e-05	0.660504
ARIH2OS	0.00304008	0.305579	0.178261	0.569557	0.0991597
CAPN1	0.011477	3.58e-05	0.639182	0.00814988	0.443417
ARL10	-0.00248291	0.622811	-0.0861139	0.8015	0.0439776
ARL11	0.00408049	0.0967223	0.285245	0.0887846	0.292157
ARL13B	-0.0058965	0.0475009	-0.337346	0.235107	-0.205602
ARL14EP	-0.00138505	0.683966	-0.0713073	0.382492	-0.151821
PCNA	0.0114736	6.89e-06	0.680422	0.00143662	0.52409
C2orf54	0.0114674	1.28e-05	0.665563	0.00106475	0.529763
CHEK1	0.0114647	5.85e-06	0.684182	3.47e-05	0.651541
ARL17B	-1.74e-05	0.787111	-0.047343	0.207149	-0.218207
ARL2	-0.00585602	0.0143443	-0.410366	0.000178937	-0.601401
POU2F3	0.0114641	5.71e-05	0.626309	0.00619309	0.457423
ARL3	0.0063507	0.0269797	0.373771	0.102874	0.280392
PRKCZ	0.0114489	2.74e-05	0.646336	0.0028472	0.494398
NUF2	0.0114484	5.7e-06	0.684764	8.28e-06	0.690196
ARL4D	-0.0037299	0.100668	-0.282062	0.0406794	-0.348739
ARL5A	-0.00659849	0.0387035	-0.350984	0.175721	-0.233894
PLEKHS1	0.0114456	6.43e-06	0.682	0.00199267	0.504623
ARL6	-0.00324149	0.250927	-0.199349	0.319466	-0.172829
ARL6IP1	-0.0035494	0.111043	-0.274121	0.024188	-0.382073
ARL6IP4	0.00262319	0.67348	0.0738089	0.338054	-0.166387
WDR62	0.0114362	1.7e-05	0.658547	0.00404494	0.478151
ARL6IP6	-0.00252563	0.391031	-0.149601	0.408708	-0.143697
ARL8A	-0.00226253	0.181082	-0.231389	0.173092	-0.235294
TCF19	0.0114355	3.64e-06	0.694821	0.0005758	0.560224
ARMC1	-0.00472277	0.0964858	-0.285439	0.0969779	-0.285154
ARMC10	-0.00299806	0.276656	-0.189084	0.348851	-0.162745
IER5L	0.0114355	1.59e-05	0.660213	0.000506698	0.564986
CDC20B	0.0114322	1.31e-05	0.66507	0.00314926	0.484982
ARMC4	0.000131348	0.933221	-0.0146966	0.794053	-0.0456583
CDC25C	0.0114254	7.78e-06	0.677592	4.02e-05	0.647339
ARMC6	0.00573635	0.149087	0.249055	0.508725	0.115126
DCLRE1B	0.0114252	2.9e-06	0.699702	1.91e-05	0.668067
ZNF212	0.0114238	4.03e-05	0.635947	0.00640407	0.455742
C2orf68	0.0114232	2.09e-05	0.653388	0.0050201	0.467787
ATP2C2	0.0114181	1.96e-05	0.654933	0.00344519	0.480989
TDP1	0.0114141	1.43e-05	0.662928	9.83e-06	0.685714
INTS4	0.011413	4.17e-05	0.635058	0.063176	0.317927
HIST1H2AE	0.0114117	4.61e-05	0.632262	0.00209001	0.508123
ARMCX5	0.00366734	0.257276	0.196754	0.676585	0.0728291
SKA3	0.0114108	1.03e-05	0.670846	0.000602118	0.558543
GPR143	0.0114053	5.26e-06	0.686597	1.24e-06	0.742297
ARNT2	0.00456674	0.125679	0.263819	0.0916698	0.289636
ARNTL	-0.00272675	0.501254	-0.11755	0.78786	-0.0470588
ARNTL2	-0.0012034	0.69794	-0.0679947	0.855348	0.0319328
ARPC1A	-0.00437667	0.039312	-0.349964	0.0111797	-0.426611
ARPC1B	0.00551654	0.0844745	0.295804	0.154996	0.245378
ARPC2	0.00292684	0.600364	0.0916946	0.875566	0.027451
ARPC3	0.00542563	0.0967761	0.285201	0.299247	0.180112
ARPC4	0.00652858	0.0835519	0.296646	0.31159	0.17563
TPX2	0.0113999	6.49e-06	0.6818	1.18e-05	0.680952
PRKCQ	0.0113979	8.84e-06	0.674584	0.000381191	0.57535
ARPC5L	0.000675314	0.783954	-0.0480618	0.812704	-0.0414566
PTK7	0.0113953	8.02e-06	0.676881	5.74e-06	0.69972
PARPBP	0.0113951	6.59e-06	0.681462	1.67e-06	0.733053
ARRB2	-0.00348173	0.351435	-0.162352	0.155964	-0.244818
PPP2R2B	0.0113908	3.98e-06	0.692823	0.000228011	0.593277
ARRDC2	-0.00277387	0.478546	-0.123817	0.54999	-0.104202
PASK	0.0113905	3.52e-06	0.695532	0.000249571	0.590196
ZNF853	0.0113903	8.9e-06	0.674425	3.68e-05	0.64986
ARSA	-0.00671392	0.00910469	-0.434489	0.00465647	-0.471429
TMEM51	0.0113865	1.03e-05	0.670825	1.78e-05	0.670028
ARSD	0.00251508	0.471869	0.125689	0.434973	0.135854
OXLD1	0.0113856	3.52e-05	0.639631	0.0503238	0.334174
ARSG	0.00545661	0.12111	0.266934	0.184327	0.229412
ARSI	-0.001236	0.793994	-0.045778	0.440721	0.134174
EFNA4	0.0113823	1.05e-05	0.67037	0.000131304	0.611485
ARSK	-0.0036591	0.411831	-0.143203	0.748549	-0.0560224
CRABP1	0.0113765	1.99e-05	0.65461	0.00653112	0.451107
HINFP	0.011376	2.96e-05	0.644275	0.00363339	0.483193
ART5	0.00320856	0.233357	0.206767	0.228046	0.208683
ARTN	0.00579685	0.0651332	0.315198	0.0790941	0.30112
ARV1	0.00639586	0.0650478	0.315293	0.590554	0.0938375
ARVCF	0.00690981	0.0429635	0.344099	0.101112	0.281793
AS3MT	-0.00619956	0.0272377	-0.373189	0.0596253	-0.322129
C5orf34	0.0113723	8.27e-06	0.67615	4.15e-06	0.708123
ASAH2	0.00520577	0.163836	0.240603	0.530748	0.109244
ASAH2B	0.0019047	0.763468	0.0527466	0.671879	-0.0739496
ASAP1	-0.0057759	0.0658757	-0.314375	0.228682	-0.208403
TCF3	0.0113722	1.15e-05	0.668323	0.000194669	0.598599
ASAP3	-0.00145766	0.615847	-0.087836	0.343842	-0.164426
C21orf58	0.0113721	2.91e-05	0.644705	0.0323184	0.363866
ASB13	0.00676759	0.0156317	0.405609	0.0178407	0.40028
ASB2	0.000749844	0.495273	0.119187	0.0910225	0.290196
TENM4	0.011372	1.31e-05	0.665106	0.000310416	0.582633
ASB6	0.0051797	0.214975	0.214944	0.430215	0.137255
NAA40	0.0113708	7.57e-06	0.678218	0.000396344	0.57395
ASB8	-0.0019407	0.588799	-0.0946046	0.402287	-0.145658
HPN	0.0113666	4.11e-05	0.635439	0.0479488	0.337535
ASCC1	0.00490251	0.207653	0.218335	0.514969	0.113445
ASCC2	-0.0046717	0.0352764	-0.356985	0.00482135	-0.469748
ASCC3	-0.00354568	0.290516	-0.183812	0.434019	-0.136134
ARHGAP39	0.0113627	1.4e-05	0.66336	0.00304695	0.491317
MARVELD2	0.0113609	2.76e-05	0.646135	0.000667726	0.554622
CREB3L4	0.0113608	4.63e-05	0.632163	0.0483382	0.336975
ASGR1	-0.00191325	0.692063	-0.0693849	0.328274	-0.169748
ASGR2	-0.00453046	0.0939183	-0.287568	0.0320383	-0.364426
KCNC3	0.0113587	7.19e-06	0.679411	4.2e-06	0.707843
ASH2L	-0.00555392	0.019411	-0.393326	0.00110061	-0.535014
ASIC1	-0.00546243	0.0749978	-0.304818	0.166899	-0.238655
ASIC2	0.0055221	0.148379	0.249475	0.560821	0.101401
ASIC3	-0.00375664	0.151699	-0.247515	0.0811396	-0.29916
ASL	0.00258922	0.686161	0.0707853	0.968616	-0.0070028
EPCAM	0.0113539	1.64e-05	0.659484	0.00270922	0.496639
ITGA3	0.0113513	6.67e-05	0.621858	0.00476584	0.470308
RAB11FIP4	0.0113512	6.34e-06	0.682337	2.67e-06	0.719888
ASNSD1	-0.00638369	0.0114849	-0.422375	0.00222827	-0.505322
POLA2	0.011344	2.66e-05	0.647078	0.00911814	0.437535
ASPG	-0.00520481	0.0202764	-0.390798	0.00462947	-0.471709
ENKUR	0.0113433	5.98e-06	0.683693	2.32e-05	0.662745
ASPHD1	-0.00285693	0.217714	-0.213696	0.139217	-0.254902
SH3D21	0.011342	8.5e-06	0.675496	8.64e-06	0.689076
PTPN6	0.0113376	7.08e-06	0.679795	0.000739607	0.5507
ASPN	-0.00509752	0.207148	-0.218572	0.973738	-0.00588235
LTA	0.0113317	1.46e-05	0.662419	0.000301628	0.57511
OTUB2	0.0113317	9.63e-06	0.672525	0.000110088	0.617087
CPNE7	0.0113288	4.79e-06	0.688725	4.26e-05	0.645658
ASS1	0.00492535	0.330008	0.169615	0.8015	0.0439776
ASTE1	0.00690864	0.0115612	0.422024	0.00279475	0.495238
C1orf174	0.0113241	1.88e-05	0.656038	0.00859932	0.440616
ASTN2	7.53e-05	0.995677	0.000950379	0.642755	-0.0809524
C7orf49	0.0113218	3.77e-05	0.63778	0.00707469	0.4507
ASXL1	-0.00409392	0.0927771	-0.288528	0.114715	-0.271429
ASXL2	-0.00512595	0.140851	-0.254041	0.576151	-0.097479
ASXL3	-0.004206	0.334633	-0.168024	0.9763	0.00532213
ATAD1	-0.00482665	0.0495943	-0.334403	0.0646426	-0.316246
SPATA17	0.0113194	3.76e-05	0.637866	0.0170018	0.403081
ATAD2B	-0.00473625	0.228298	-0.208972	0.960936	-0.00868347
ATAD3A	0.00666012	0.10296	0.280256	0.875566	0.027451
ATAD3B	0.000776879	0.782417	-0.0484123	0.575049	-0.0977591
ATAD3C	0.00613665	0.116144	0.270422	0.827701	0.0380952
RTKN2	0.0113153	4.16e-06	0.691837	2.1e-05	0.665546
ZNF443	0.0113116	1.13e-05	0.668587	0.00040885	0.572829
UBE2T	0.0113106	1.53e-05	0.661222	0.000418459	0.571989
ATF1	-0.00442501	0.160389	-0.242528	0.482114	-0.122409
EVA1A	0.011308	4.08e-06	0.692282	2.7e-05	0.658543
NOXA1	0.011302	0.000106895	0.608022	0.00976571	0.433894
TP73	0.0112974	9.6e-06	0.672621	0.000548992	0.554381
ELMO3	0.0112961	4.65e-05	0.632018	0.0479488	0.337535
ATF6	-0.00607273	0.0321792	-0.36283	0.145563	-0.25098
E2F5	0.011294	2.18e-05	0.65221	0.0006776	0.554062
C1orf116	0.0112922	1.62e-05	0.659863	0.00195283	0.505464
ATF7IP	0.000788961	0.539532	0.107301	0.56191	0.10112
ATF7IP2	0.00519518	0.064606	0.315786	0.157912	0.243697
ATG10	-0.00218486	0.307934	-0.177409	0.123029	-0.265546
ERP27	0.0112899	1.05e-05	0.670431	5.85e-05	0.636415
ATG13	-0.000846321	0.439481	-0.134975	0.283533	-0.185994
LIPH	0.0112893	5.51e-05	0.627285	0.0170018	0.403081
ATG16L1	-0.000343467	0.629637	-0.0844338	0.78168	0.0484594
ATG16L2	-0.00596866	0.0391029	-0.350313	0.0589347	-0.322969
ATG2A	-0.00517605	0.0318137	-0.36355	0.00329872	-0.487675
MAZ	0.0112871	2.57e-05	0.647994	0.00238957	0.502241
ATG3	0.00254384	0.779212	0.0491432	0.740029	-0.0579832
CDCA3	0.0112865	1.25e-05	0.666314	0.000215175	0.595238
ATG4B	0.00526555	0.28328	0.186544	0.996797	-0.000840336
ATG4C	0.00115165	0.502057	0.117331	0.820195	0.0397759
ATG4D	0.00355034	0.442754	0.13402	0.821445	-0.0394958
ATG5	-0.00328733	0.116938	-0.269857	0.0641508	-0.316807
ATG7	0.00383775	0.178704	0.232621	0.456253	0.129692
ATG9A	0.000308463	0.554412	-0.103412	0.067147	-0.313445
CD9	0.0112827	2.62e-05	0.647495	7.76e-06	0.691877
ATHL1	0.0024629	0.367773	0.156993	0.331514	0.168627
BMPR1B	0.0112772	3.12e-05	0.642863	1.91e-06	0.729132
ATL1	-0.0065585	0.101282	-0.281575	0.987828	-0.00280112
ATL2	0.000790613	0.862092	-0.0304622	0.842758	-0.0347339
ATP6V1B1	0.0112768	4.31e-05	0.63413	0.0149013	0.410644
ATM	-0.00468425	0.399079	-0.147103	0.820195	-0.0397759
TMEM184A	0.0112728	2.3e-05	0.650835	0.00936271	0.436134
ATN1	-0.0061891	0.00553232	-0.459117	0.00363339	-0.483193
BICD1	0.0112715	1.2e-05	0.667261	2.05e-05	0.666106
ATOX1	0.00599261	0.0902306	0.290705	0.359003	0.159384
ATP10A	-0.00192479	0.533022	-0.109018	0.845273	0.0341737
ATP10B	0.00696477	0.0307832	0.365616	0.0666401	0.314006
MREG	0.0112661	3.41e-06	0.696215	0.000542302	0.562465
HKDC1	0.011265	2.41e-05	0.649703	0.000445306	0.561782
PIGU	0.0112597	9.11e-05	0.612774	0.00997272	0.432773
UNC13D	0.0112549	2.14e-05	0.652742	0.0246334	0.380952
CBX2	0.0112467	2.2e-05	0.65203	0.00140789	0.52493
PPP1CA	0.0112456	5.93e-05	0.625222	0.0202819	0.392717
ATP13A3	-0.00663804	0.0227215	-0.384111	0.121814	-0.266387
ATP1A1	-0.00380874	0.116487	-0.270177	0.22363	-0.210644
TFR2	0.0112439	3.31e-05	0.641266	9.2e-05	0.622689
TROAP	0.0112406	1.48e-05	0.662074	0.000241529	0.591317
ATP1B1	0.00573782	0.031642	0.36389	0.0829256	0.297479
WDR72	0.011236	9.88e-06	0.671933	9.2e-05	0.622689
SLC24A2	0.0112345	8.31e-05	0.61551	0.000558263	0.553781
ATP2A1	-0.000154949	0.63277	-0.0836649	0.913676	-0.0190476
CLDN7	0.0112336	2.52e-05	0.648537	0.0094621	0.435574
ATP2A3	-0.00582975	0.160214	-0.242626	0.625528	-0.0851541
ZBED2	0.0112332	2.17e-05	0.652341	0.00218598	0.506162
ATP2B2	0.00681523	0.0324028	0.362393	0.0907001	0.290476
STYK1	0.0112324	1.34e-05	0.664543	0.000800818	0.547619
ZNF707	0.0112307	1.52e-05	0.661417	0.000502873	0.565266
TLDC2	0.011227	2.8e-05	0.645748	0.000132188	0.601569
ATP5A1	-0.00346346	0.0926297	-0.288653	0.00916661	-0.437255
ATP5B	-0.0017556	0.211247	-0.21666	0.0469864	-0.338936
ATP5C1	0.00293738	0.52677	0.110677	0.198946	-0.222129
ATP5D	0.000205811	0.635902	-0.082898	0.0165146	-0.404762
ATP5E	0.000741262	0.883051	-0.0257976	0.442646	-0.133613
ATP5F1	0.00414434	0.501861	0.117385	0.649699	-0.0792717
CCNA2	0.011225	5.18e-06	0.686931	8.93e-06	0.688235
ATP5G2	0.00629161	0.086187	0.29426	0.519154	0.112325
ATP5G3	-0.000513265	0.50972	-0.115251	0.0337494	-0.361064
ATP5H	0.000366113	0.503284	-0.116997	0.10323	-0.280112
ATP5I	0.00304971	0.689018	0.070107	0.473076	-0.12493
ATP5J	-0.00433212	0.0446049	-0.341592	0.00426553	-0.47563
ATP5J2	0.00229108	0.79785	0.044903	0.415187	-0.141737
ATP5J2-PTCD1	0.00350881	0.553389	0.103678	0.717062	0.0633053
ATP5L	-0.00189883	0.286447	-0.185342	0.0865897	-0.294118
ATP5O	0.00348067	0.59426	0.0932273	0.331514	-0.168627
CLDN22	0.011223	1.38e-05	0.663885	0.00216913	0.501068
ATP5SL	0.00104006	0.703266	-0.0667383	0.251028	-0.19888
CDC45	0.0112177	1.69e-05	0.658802	1.58e-05	0.673109
ATP6AP1L	0.00103729	0.865124	0.0297863	0.465118	-0.127171
ATP6AP2	-0.00419921	0.22479	-0.210521	0.989109	-0.00252101
LAMP3	0.011215	6.11e-06	0.683195	6.49e-05	0.633333
EPN3	0.0112129	4.57e-05	0.632514	0.00142352	0.518352
LAPTM4B	0.0112105	4.85e-05	0.630843	0.0194388	0.395238
ATP6V0C	-0.00395751	0.105929	-0.277962	0.0869006	-0.293838
ATP6V0D1	-0.000939362	0.528581	-0.110196	0.199525	-0.221849
ATP6V0D2	0.00611118	0.00559592	0.458571	5.93e-06	0.683872
ATP6V0E1	-0.00161612	0.310342	-0.176542	0.113946	-0.271989
ATP6V0E2	0.00425302	0.41054	0.143595	0.449421	-0.131653
ATP6V1A	-0.00196229	0.729119	-0.0606849	0.505617	-0.115966
CCNA1	0.0112065	4.97e-05	0.630192	0.00162012	0.519048
ATP6V1B2	-0.00248343	0.569815	-0.0994371	0.244975	-0.201401
ATP6V1C1	-0.00178206	0.454801	-0.130538	0.244308	-0.201681
ATP6V1C2	-0.00426904	0.0586578	-0.322705	0.0310736	-0.366387
ATP6V1D	-0.00682695	0.00594692	-0.455652	0.0024818	-0.50056
CORO2A	0.0112059	2.99e-05	0.644021	0.000131304	0.611485
MELK	0.0112031	1.27e-05	0.665923	1.08e-05	0.683193
ATP6V1F	0.0039686	0.217002	0.21402	0.636992	0.0823529
ATP6V1G1	0.00397249	0.191593	0.226074	0.117045	0.269748
ATP6V1G2	-0.00165197	0.904916	-0.0209501	0.414258	0.142017
ATP6V1G2-DDX39B	0.00318981	0.665298	0.0757709	0.723083	0.0619048
ATP6V1H	-0.00557522	0.0258824	-0.376299	0.0050201	-0.467787
TMEM45B	0.0111992	3.65e-05	0.638625	0.000119608	0.604625
CCNE1	0.011198	2.35e-05	0.650334	0.000160194	0.605042
MYO3B	0.011197	8.59e-06	0.675251	2.73e-06	0.701029
ATP8A2	0.00446185	0.168079	0.238274	0.58944	0.0941176
ATP8B1	0.00484624	0.101413	0.281472	0.0155756	0.408123
ATP8B2	-0.00575877	0.148179	-0.249595	0.851567	0.0327731
ATP8B3	-0.00472864	0.106148	-0.277794	0.224886	-0.210084
EZH2	0.0111948	1.74e-05	0.657977	0.000584457	0.559664
LAMP5	0.0111936	5.4e-06	0.686005	2.2e-06	0.72521
ATP9B	-0.00584034	0.0417299	-0.346034	0.101112	-0.281793
ATPAF1	-0.00697947	0.00334571	-0.482297	0.000201301	-0.597479
ATPAF2	0.000502152	0.881877	0.0260584	0.109042	-0.27563
2009-09-01	0.0111892	3.13e-05	0.642756	0.000473189	0.567507
ATR	-0.000176968	0.709012	-0.0653867	0.674231	-0.0733894
ATRAID	0.000723228	0.839452	-0.0355241	0.493282	-0.119328
ATRIP	0.000788381	0.937024	-0.013858	0.516014	-0.113165
ATRN	0.00266914	0.378645	0.153504	0.368465	0.156303
ZNF74	0.0111882	3.9e-05	0.636834	0.00431595	0.47507
PRRG2	0.0111881	7.63e-05	0.617997	0.0267234	0.37591
LEPREL4	0.011186	1.44e-05	0.662672	0.000118173	0.614846
ATXN10	0.000415415	0.537661	-0.107793	0.102874	-0.280392
SAPCD2	0.0111836	1.93e-05	0.655363	0.000177429	0.601681
PLK1	0.0111796	1.4e-05	0.663442	0.000186654	0.6
ATXN2L	0.0016457	0.940059	0.0131888	0.43976	-0.134454
MOXD1	0.0111789	3.74e-06	0.694209	3.43e-06	0.713165
PLK4	0.0111755	7.82e-06	0.677474	3.51e-05	0.651261
FKBPL	0.0111717	7.42e-05	0.618799	0.0406794	0.348739
ZNF681	0.0111711	8.24e-06	0.676239	0.000193042	0.59888
ATXN7L3	0.00515005	0.213442	0.215648	0.926427	0.0162465
SPSB2	0.0111697	1.44e-05	0.662798	0.000170055	0.603081
TMPRSS6	0.0111679	4.81e-05	0.631121	0.00255579	0.494086
RNF8	0.011166	9.92e-05	0.610257	0.010344	0.430812
AUP1	0.00520669	0.295416	0.181986	0.957097	-0.00952381
CENPF	0.0111563	9.83e-06	0.67204	1.09e-05	0.682913
AURKAIP1	0.0017891	0.855826	-0.0318605	0.0929752	-0.288515
RITA1	0.0111561	6.54e-05	0.62243	0.0117683	0.42381
AURKC	-0.00454395	0.132641	-0.25923	0.222379	-0.211204
AUTS2	-0.00354846	0.537188	-0.107918	0.582778	0.0957983
AVEN	-0.0027552	0.0919844	-0.289201	0.0055958	-0.462465
AVIL	-0.00413057	0.0652407	-0.315078	0.0814351	-0.29888
AVL9	0.00299035	0.393933	0.148697	0.909855	-0.019888
RAD54L	0.0111537	2e-05	0.654481	0.000812417	0.547059
SLC29A3	0.0111537	1.4e-05	0.663446	0.000298238	0.584034
AVPR2	-0.00559947	0.0300698	-0.36708	0.011065	-0.427171
AXIN1	0.00101648	0.864227	-0.0299861	0.940474	0.0131653
AXIN2	0.00259424	0.308978	0.177033	0.352216	0.161625
SMPX	0.0111446	5.59e-06	0.685225	4.51e-06	0.690043
QPCTL	0.0111403	4.78e-05	0.631289	0.00434135	0.47479
SLC35C2	0.0111377	5.85e-05	0.625627	0.0055958	0.462465
CEP55	0.0111351	1.57e-05	0.660665	2.9e-06	0.717647
AZIN1	-0.00196407	0.443818	-0.133711	0.298486	-0.180392
B2M	-0.00434754	0.204167	-0.219979	0.238366	-0.204202
NUP62	0.011131	3.54e-05	0.639477	0.00516638	0.466387
B3GALNT2	-0.00558265	0.0676592	-0.312428	0.392317	-0.148739
B3GALT1	0.00184044	0.584952	0.0955781	0.298486	-0.180392
B3GALT2	-0.00380799	0.398091	-0.147408	0.623246	-0.0857143
B3GALT4	0.00418206	0.284087	0.186237	0.676585	0.0728291
ALPK2	0.0111306	7.61e-06	0.678101	4.43e-06	0.706443
B3GALT6	0.00461079	0.310011	0.176662	0.902219	0.0215686
B3GALTL	-0.00308817	0.297161	-0.181341	0.556477	-0.102521
B3GAT1	0.00096068	0.61879	0.0871073	0.464129	0.127451
OIP5	0.0111283	1.66e-05	0.659251	1.83e-05	0.669188
COPS7B	0.0111245	9.4e-05	0.611876	0.0460397	0.340336
B3GNT2	-0.00230745	0.441689	-0.13433	0.599496	-0.0915966
NUSAP1	0.0111229	2.05e-05	0.653831	8.02e-06	0.691036
TTC30B	0.0111225	2.57e-05	0.647941	0.00286487	0.494118
B3GNT7	0.000336429	0.879226	0.0266475	0.841501	0.035014
B3GNT8	0.00335323	0.17703	0.233495	0.287966	0.184314
B3GNT9	-0.00048191	0.818052	0.0403347	0.483123	0.122129
MMP13	0.0111213	2.79e-05	0.645796	0.00033307	0.571771
B4GALNT1	0.0014439	0.588879	0.0945845	0.494304	0.119048
GTF2IRD1	0.011119	7.74e-05	0.617583	0.00743213	0.448179
ATPIF1	0.0111157	0.000105464	0.608427	0.000977353	0.539776
B4GALT1	-0.00644767	0.0262081	-0.37554	0.0872124	-0.293557
B4GALT2	0.00446352	0.252205	0.198823	0.932809	0.0148459
B4GALT3	0.00254566	0.923218	0.016904	0.758322	-0.0537815
B4GALT4	-0.00513428	0.039939	-0.348927	0.0278224	-0.373389
B4GALT5	-0.00390118	0.0979025	-0.284283	0.202433	-0.220448
POLG2	0.0111152	8.09e-05	0.616292	0.0235325	0.383754
B4GALT7	0.00584755	0.130217	0.260807	0.871769	0.0282913
B9D1	0.00544431	0.126775	0.263084	0.800258	0.0442577
LPAR3	0.0111147	4.25e-05	0.634533	0.0058501	0.456442
POC1A	0.0111142	8.38e-05	0.615238	0.0147549	0.411204
FAM213B	0.0111116	8.06e-05	0.616401	0.00823812	0.442857
BACE1	-0.000331048	0.743163	-0.0574257	0.792813	-0.0459384
ZNF793	0.0111043	1.14e-05	0.668499	2.29e-06	0.72409
ZWINT	0.0110967	2.15e-05	0.652643	1.03e-05	0.684594
CTHRC1	0.0110965	4.66e-06	0.689326	2.36e-06	0.723249
BAD	0.00268797	0.796642	0.045177	0.418916	-0.140616
BAG1	-0.00636128	0.0102562	-0.42833	0.00651186	-0.454902
BAG2	0.000108208	0.770931	0.0510359	0.229958	0.207843
SOX11	0.0110949	2.85e-05	0.645277	4.15e-05	0.635199
BAG4	-0.00225259	0.415895	-0.141975	0.0785171	-0.301681
HIST2H4B	0.0110946	0.000102609	0.60925	0.0386833	0.352101
BAG6	0.00223087	0.947573	0.0115331	0.322652	-0.171709
BAHD1	-0.00683107	0.00735912	-0.445229	0.00615851	-0.457703
BAI1	0.00104962	0.624169	0.0857792	0.869239	0.0288515
BAI2	0.00333686	0.307287	0.177643	0.17945	0.231933
B4GALNT4	0.0110916	4.91e-05	0.630509	0.00264245	0.497759
CYFIP2	0.0110884	9.33e-06	0.67328	1.14e-05	0.681793
SLC29A2	0.0110872	0.000114322	0.605996	0.0513411	0.332773
BAIAP2L2	-0.0013639	0.40895	-0.144078	0.0228919	-0.385434
BAIAP3	0.00125723	0.907139	-0.020458	0.35306	-0.161345
UBE2C	0.0110808	1.67e-05	0.659118	0.000133616	0.610924
MYL6B	0.0110793	6.59e-05	0.622221	0.0170018	0.403081
PALM3	0.0110768	5.31e-05	0.628349	0.000674439	0.546932
BANK1	-0.00621768	0.0551796	-0.327012	0.0375565	-0.354062
BANP	0.00455044	0.406863	0.144714	0.964776	0.00784314
BAP1	-0.00536479	0.0333619	-0.360546	0.0128295	-0.419048
LRRN2	0.011074	4.97e-05	0.63017	0.00138902	0.52549
BARX1	-0.00434916	0.171712	-0.236313	0.587216	-0.0946779
ALCAM	0.0110666	2.38e-06	0.703932	5.37e-07	0.77451
BASP1	0.00519468	0.0466874	0.338517	0.0186253	0.397759
BATF	-0.00344587	0.304466	-0.178665	0.430215	-0.137255
BATF2	0.00440512	0.293697	0.182625	0.573949	0.0980392
C11orf49	0.0110645	8.01e-05	0.616582	0.00471088	0.470868
NIF3L1	0.0110634	9.02e-05	0.613068	0.0445572	0.342577
BAZ1A	-0.00532954	0.0590949	-0.322178	0.179987	-0.231653
DNMT3A	0.0110631	1.46e-05	0.662336	0.000107187	0.617927
SCGB1D2	0.011057	6.38e-05	0.62312	0.0016693	0.511922
ZSCAN16	0.0110565	2.85e-05	0.645256	0.0117683	0.42381
TK1	0.011048	3.75e-05	0.637927	0.00213068	0.507283
LPAR2	0.0110466	5.66e-05	0.626534	0.00378888	0.481232
SCGB2A1	0.0110418	4.04e-05	0.635888	0.000401501	0.56538
BBS1	-0.000481587	0.664783	-0.0758949	0.314725	-0.17451
BBS10	-0.0067584	0.0425992	-0.344665	0.0770892	-0.303081
BBS12	-0.00626157	0.0305921	-0.366006	0.027575	-0.37395
HUNK	0.0110397	5.8e-05	0.625828	0.00986875	0.433333
BBS4	0.00161743	0.773701	0.0504023	0.548912	-0.104482
CMTM7	0.0110387	2.67e-05	0.647002	0.00190913	0.512045
SLC6A12	0.0110363	2.15e-05	0.652609	3.51e-05	0.651261
RIMS4	0.0110332	2.78e-05	0.645921	5.27e-05	0.639496
CEP89	0.0110321	4.52e-05	0.632821	0.000593229	0.559104
ARL4C	0.0110316	8.96e-05	0.613269	0.000149556	0.607283
BCAN	0.00440679	0.0772783	0.302571	0.0926475	0.288796
RPS21	0.01103	5.55e-05	0.627075	0.00487743	0.469188
BCAP31	-0.00371013	0.069504	-0.310457	0.00135194	-0.526611
BCAR1	-0.00447072	0.0739855	-0.305832	0.11783	-0.269188
KIF23	0.0110263	2.13e-05	0.652879	6.61e-07	0.765266
BCAS1	-0.00416893	0.192568	-0.225591	0.374564	-0.154342
BCAS2	-0.00473036	0.113813	-0.272097	0.141009	-0.253782
BCAS3	-0.00101983	0.447087	-0.132762	0.10323	-0.280112
DEDD2	0.0110198	5.14e-05	0.629248	0.00951213	0.435294
BCAT1	0.00610841	0.0189152	0.394817	0.00252907	0.49972
BCAT2	0.00661664	0.0857223	0.294677	0.962216	0.00840336
BCCIP	-0.00074834	0.496079	-0.118965	0.741244	-0.0577031
CNTN5	0.0110162	3.48e-05	0.639964	8.48e-07	0.724825
OXTR	0.0110159	2.03e-05	0.65407	0.00381156	0.480952
BCKDHA	-0.000802414	0.393305	-0.148892	0.0272073	-0.37479
KRT17	0.0110159	4.59e-05	0.632382	0.00076975	0.542055
BCKDK	-0.00519786	0.0296428	-0.36797	0.00110827	-0.534734
BCL10	-0.00443269	0.0849475	-0.295375	0.0542778	-0.328852
SFI1	0.0110125	1.93e-05	0.655325	0.00806246	0.443978
BCL11B	0.00118275	0.299739	0.180392	0.293948	0.182073
FOLR1	0.0110103	5.33e-05	0.628216	0.000363691	0.577031
BCL2A1	-0.00566932	0.0767254	-0.303111	0.139663	-0.254622
BCL2L1	0.00239792	0.747485	0.0564266	0.71586	0.0635854
BCL2L11	0.000216322	0.64331	0.0810899	0.0737455	0.306443
RAD54B	0.0110092	1.53e-05	0.661154	0.000522257	0.563866
SYNGR3	0.0110061	2.22e-05	0.651817	5.53e-05	0.638095
FOXM1	0.0110058	2.34e-05	0.650441	4.26e-05	0.645658
CYBA	0.0110039	3.73e-05	0.638094	0.00457588	0.472269
GAPDH	0.0110011	0.000123051	0.603761	0.0196235	0.394678
BCL2L2-PABPN1	-0.00319761	0.420466	-0.140601	0.301537	-0.179272
BCL3	-0.00608601	0.0181347	-0.397231	0.0185367	-0.398039
TPD52	0.0109997	4.37e-05	0.633756	0.000904267	0.542857
TMC4	0.0109932	7.29e-05	0.619329	0.028449	0.371989
BCL7A	0.0049609	0.174043	0.23507	0.349691	0.162465
MEIS1	0.0109903	5.08e-05	0.629588	0.000336112	0.579832
BCL7C	0.00417104	0.25207	0.198878	0.513926	0.113725
WNT7A	0.0109899	4.06e-05	0.635794	0.00240029	0.496775
BCL9L	-0.00163177	0.288457	-0.184584	0.067657	-0.312885
FADD	0.0109876	5.91e-05	0.625318	0.00510743	0.466947
PYGO2	0.0109857	0.000148344	0.598006	0.0481432	0.337255
BCOR	-0.00149204	0.507207	-0.115931	0.989109	-0.00252101
BCORL1	-0.00469261	0.0521255	-0.330975	0.0820288	-0.298319
MUC1	0.0109847	8.34e-05	0.615384	0.00372154	0.482073
BCS1L	0.00520292	0.216283	0.214347	0.709859	-0.064986
BDH1	0.00672191	0.0438875	0.342678	0.174666	0.234454
RCC2	0.0109842	6.63e-05	0.622038	0.00157765	0.520168
FUT8	0.0109833	2.09e-05	0.653353	3.57e-05	0.6507
BIK	0.0109816	5.75e-05	0.626116	0.0106164	0.429412
BDNF	-0.00562225	0.0340232	-0.359297	0.154033	-0.245938
ALG1L	0.010981	4.3e-05	0.63419	0.00342092	0.485994
BEAN1	-0.00221881	0.647364	-0.0801041	0.770591	-0.0509804
ZNF440	0.0109779	2.65e-05	0.647225	0.000154793	0.606162
CLDN3	0.0109771	4.96e-05	0.630256	0.0012889	0.522301
BEND3	0.00381674	0.372345	0.155518	0.287224	0.184594
BEND4	-0.000773214	0.62726	0.085018	0.364255	0.158134
BEND5	0.000158719	0.714546	0.0640883	0.472077	0.12521
BEND6	0.00516946	0.022875	0.383712	0.000270734	0.587395
BEND7	0.00054676	0.887288	-0.0248568	0.673055	-0.0736695
TFPT	0.0109683	0.000265205	0.579391	0.143273	0.252381
PSMG3	0.0109667	8.01e-05	0.616581	0.0196235	0.394678
BET1	-0.0067831	0.0400598	-0.348728	0.0262466	-0.377031
BET1L	-0.00445502	0.126441	-0.263308	0.146024	-0.2507
BEX1	0.00149823	0.572804	0.0986714	0.582778	-0.0957983
KIF20A	0.0109651	2.17e-05	0.652438	3.85e-06	0.710084
BEX4	0.00642814	0.0277152	0.372124	0.175193	0.234174
BEX5	0.000874553	0.628813	0.0846361	0.3556	0.160504
BFAR	-0.00230855	0.202832	-0.220613	0.00784742	-0.445378
COL9A2	0.0109639	1.73e-05	0.658208	1.19e-05	0.680672
HTR3A	0.0109576	0.000181958	0.591591	0.000964291	0.533567
BHLHB9	0.00040309	0.838452	-0.0357482	0.210735	-0.216527
BHLHE22	-0.00660306	0.0738315	-0.305987	0.42832	-0.137815
BHLHE40	-0.0064953	0.0138063	-0.412461	0.0255448	-0.378711
KIF4A	0.0109524	2.29e-05	0.65104	9.42e-06	0.686835
RFXANK	0.0109502	0.000147858	0.598108	0.0589347	0.322969
NMU	0.0109425	3.07e-05	0.643288	0.000197806	0.588928
ITPA	0.0109396	0.000314351	0.573723	0.0689455	0.311485
DCLRE1C	0.0109376	8.41e-06	0.675753	0.000866478	0.544538
BID	0.00286829	0.686974	0.0705921	0.962216	0.00840336
TMEM63C	0.0109363	0.000144286	0.598867	0.00392674	0.479552
REEP4	0.0109361	0.000129882	0.602109	0.0134236	0.416527
BIN2	-0.00122946	0.95973	0.00885629	0.826449	0.0383754
INPPL1	0.0109329	0.00011469	0.605899	0.00936271	0.436134
FKBP10	0.0109328	3.29e-05	0.641433	0.000154793	0.606162
BIRC3	-0.00679395	0.0374782	-0.353078	0.0188932	-0.396919
CRABP2	0.0109268	1.39e-05	0.663691	1.5e-05	0.67451
BIRC6	-0.00503228	0.121751	-0.266492	0.523355	-0.111204
BIRC7	0.00447593	0.0390526	0.350398	0.0551412	0.327731
EPYC	0.0109218	5.02e-06	0.687647	1.13e-05	0.682073
BIVM-ERCC5	-0.00379024	0.294317	-0.182394	0.337751	-0.166958
ZNF687	0.0109099	2.21e-05	0.651911	0.000201301	0.597479
BLK	0.00362388	0.12339	0.265369	0.0619742	0.319328
TUBB4A	0.0109067	7.09e-05	0.620099	0.00180025	0.514566
BLMH	-0.00483043	0.0850007	-0.295327	0.553229	-0.103361
HDAC1	0.0109053	8.42e-05	0.615103	0.00449651	0.473109
BLOC1S1	0.00180745	0.85193	0.032731	0.226146	-0.209524
BLOC1S2	0.00127161	0.518672	0.11284	0.695529	0.0683473
CDSN	0.0109035	5.57e-05	0.627005	0.00239293	0.496906
BLOC1S4	0.00620091	0.0878459	0.292786	0.174666	0.234454
BLOC1S5	0.00586235	0.0359547	0.35576	0.417982	0.140896
BLOC1S5-TXNDC5	0.00220327	0.425745	0.139025	0.81713	0.0405428
CDCA8	0.0108988	2.15e-05	0.6526	0.000125681	0.612885
ZNF625	0.0108988	2.7e-05	0.64666	0.00031541	0.582073
BLVRB	-0.00693014	0.00677516	-0.449311	0.000300638	-0.583754
CCDC24	0.0108945	5.81e-05	0.625823	0.0031035	0.490476
RCOR2	0.010892	5.81e-05	0.62581	0.00103374	0.537535
NCMAP	0.0108894	8.36e-05	0.615317	0.000165764	0.603922
BMP1	-0.00256663	0.328091	-0.170279	0.42643	-0.138375
NOTUM	0.0108863	1.34e-05	0.664447	2.43e-06	0.703547
BMP2K	-0.0023774	0.598729	-0.0921044	0.995516	-0.00112045
WNT10A	0.0108861	6.96e-05	0.62063	0.00612411	0.457983
BMP4	-0.00688983	0.0161288	-0.403861	0.0536374	-0.329692
ZNF675	0.0108847	5.61e-06	0.685123	0.000325614	0.580952
C15orf52	0.0108838	0.0001389	0.600044	0.00719215	0.44986
BMP7	0.00437985	0.140264	0.254405	0.102874	0.280392
BMP8A	0.00135458	0.408812	0.14412	0.0869006	0.293838
BMP8B	-0.00147069	0.637202	-0.08258	0.54999	-0.104202
DRP2	0.010878	7.06e-06	0.679855	1.61e-06	0.734174
KIF1A	0.0108752	3.95e-05	0.636508	0.000588828	0.559384
ERBB2	0.0108751	0.000131135	0.601815	0.00556413	0.462745
RPS18	0.0108749	7.69e-05	0.617743	0.0366121	0.355742
BMS1	-2.23e-05	0.615699	-0.0878729	0.687218	-0.0703081
UBD	0.0108736	1.33e-05	0.664665	6.43e-05	0.633613
PPAP2C	0.0108728	0.000151252	0.597402	0.0161964	0.405882
RANBP17	0.0108692	6.35e-05	0.623257	0.00135194	0.526611
BNIP1	0.0033415	0.618734	0.0871212	0.803987	-0.0434174
PDIA4	0.0108685	2.91e-05	0.644706	0.000255759	0.589356
SYTL1	0.0108648	3.82e-05	0.637447	0.000634169	0.556583
PRSS8	0.0108645	5.39e-05	0.6279	0.00197208	0.510644
MAST1	0.0108643	6.8e-05	0.621297	0.000638869	0.556303
PPIH	0.0108606	0.000425964	0.56333	0.00207661	0.508403
BOD1	0.00323501	0.803129	0.0437066	0.334774	-0.167507
LIMS3	0.010859	6.93e-05	0.620751	0.000524011	0.556042
TRIM11	0.010856	0.000154114	0.596818	0.0396711	0.35042
BOLA1	0.00173671	0.818998	0.0401215	0.543539	-0.105882
DNASE2	0.0108529	2.55e-05	0.648226	0.000448506	0.569468
ATXN7L3B	0.0108521	2.93e-05	0.644552	0.00195935	0.510924
BOLA3	0.00252613	0.902187	0.0215541	0.712258	-0.0644258
PRPF6	0.0108477	0.000175309	0.59277	0.0946272	0.287115
ZFP82	0.0108462	5.7e-05	0.626318	0.000384179	0.57507
BPGM	0.00238903	0.65414	0.0784615	0.592784	-0.0932773
BPHL	-0.00581153	0.0285629	-0.370269	0.0094621	-0.435574
BPI	-0.00596487	0.0488937	-0.335377	0.344674	-0.164146
BPNT1	0.00389881	0.548236	0.10502	0.479091	-0.123249
BPTF	-0.00343308	0.241277	-0.203378	0.411478	-0.142857
LRRC45	0.0108444	7.73e-05	0.617614	0.0219584	0.387955
BRAP	-0.0051714	0.04602	-0.33949	0.0729277	-0.307283
BRAT1	0.00514702	0.165004	0.239958	0.61642	0.087395
BRCA1	0.00684501	0.0243034	0.380096	0.394119	0.148179
CACNG4	0.0108435	7.57e-05	0.618218	0.00199777	0.510084
BIRC5	0.0108398	3.81e-05	0.637521	0.000107187	0.617927
SCNM1	0.0108388	0.000110445	0.607039	0.0355351	0.357703
BRD2	-0.0039093	0.115104	-0.271166	0.105381	-0.278431
BRD3	0.000839648	0.784601	0.0479144	0.573949	0.0980392
BRD4	-0.00220444	0.381758	-0.152516	0.620967	-0.0862745
BRD7	-0.000225773	0.475562	-0.124652	0.0203775	-0.392437
DDOST	0.0108374	0.000251982	0.581076	0.0330275	0.362465
BRD9	0.00303886	0.657822	0.0775718	0.842758	0.0347339
BRE	0.0048985	0.268535	0.192254	0.571751	0.0985994
BRF1	-0.000561312	0.664322	-0.0760057	0.141459	-0.253501
KCNJ10	0.0108371	9.23e-06	0.673545	4.4e-06	0.69063
BRI3	-0.00193851	0.438723	-0.135197	0.0499215	-0.334734
BRI3BP	0.00448161	0.137868	0.2559	0.43976	0.134454
BRICD5	0.00542126	0.111907	0.273486	0.632396	0.0834734
BRINP1	0.00550287	0.0626945	0.317953	0.016469	0.402689
SLC35F2	0.0108361	0.000119132	0.604746	0.000418459	0.571989
DDX41	0.010832	0.00026376	0.579571	0.109413	0.27535
BRIX1	-0.000344667	0.564113	-0.100903	0.836477	-0.0361345
BRK1	-0.000509656	0.447746	-0.132571	0.106834	-0.277311
CRB3	0.0108309	3.94e-05	0.636567	0.00117465	0.525947
ZNF816	0.0108283	2.39e-05	0.649902	0.000611125	0.557983
BROX	0.00155277	0.54066	0.107004	0.596136	0.092437
BRPF1	-0.00452404	0.143744	-0.252266	0.74246	-0.057423
KLHDC9	0.0108237	9.5e-05	0.61156	0.00673217	0.453221
KIAA1324	0.0108188	4.48e-05	0.633084	0.0198098	0.394118
EXO1	0.0108188	2.05e-05	0.653846	8.71e-05	0.62437
MORN4	0.0108125	4e-05	0.636139	6.67e-05	0.632493
BRWD3	-0.00411196	0.253487	-0.198297	0.813952	-0.0411765
VEPH1	0.0108114	0.000109749	0.607229	0.024188	0.382073
HMGB3	0.0108104	5.61e-05	0.626775	0.00246621	0.50084
BSG	-0.00192533	0.217185	-0.213936	0.0370818	-0.354902
BSN	0.00441009	0.0797499	0.300194	0.0378756	0.353501
RAD51AP1	0.0108094	1.39e-05	0.663611	3.54e-05	0.65098
XRCC3	0.0108089	8.1e-05	0.61623	0.00240473	0.501961
IQCD	0.0108056	8.45e-05	0.615013	0.00148566	0.522689
CDCA2	0.0108005	3.04e-05	0.64357	5.07e-05	0.640616
XYLT2	0.0107988	7.65e-05	0.617923	0.000891512	0.543417
BTBD10	-0.0049359	0.0430029	-0.344038	0.0370818	-0.354902
BTBD11	0.00077762	0.648476	0.079834	0.338878	0.166106
HSD17B14	0.0107975	2.68e-05	0.646898	0.00232977	0.503361
BTBD2	0.00284989	0.450278	0.13184	0.630103	-0.0840336
BTBD3	-0.00450943	0.116268	-0.270333	0.55431	-0.103081
ZNF581	0.0107972	3.14e-05	0.642735	0.00395014	0.479272
KIAA0907	0.0107964	3.31e-05	0.64128	0.000723651	0.551541
BTBD8	-0.00543437	0.149825	-0.248618	0.0577979	-0.32437
BTBD9	-0.00417094	0.242686	-0.202783	0.0648897	-0.315966
BTC	-0.00298395	0.126791	-0.263074	0.17625	-0.233613
DEPDC7	0.0107953	1.44e-05	0.662764	4.2e-06	0.707843
BTF3	-0.00288678	0.159603	-0.242971	0.0648897	-0.315966
BTF3L4	-0.000956023	0.63647	-0.082759	0.611887	-0.0885154
MIS18A	0.0107918	3.96e-05	0.636464	0.00215817	0.506723
SLC30A2	0.0107918	9.68e-05	0.610986	0.000233719	0.592437
BTG3	0.00324777	0.562876	0.101221	0.926427	0.0162465
BTK	0.0021375	0.205392	0.219399	0.213757	0.215126
BTLA	0.00363649	0.1066	0.27745	0.128399	0.261905
BTN2A1	0.00251566	0.564365	0.100838	0.479091	0.123249
BTN2A2	0.00515864	0.0422541	0.345206	0.0584779	0.323529
BTN3A1	-0.000363874	0.957958	-0.0092463	0.873034	-0.0280112
BTN3A2	-0.00121873	0.950553	-0.0108768	0.441683	-0.133894
BTN3A3	-0.00393971	0.249431	-0.199966	0.138772	-0.255182
VTCN1	0.0107882	5.93e-05	0.625219	0.00473829	0.470588
ZNF184	0.0107873	2.49e-05	0.648837	0.000325614	0.580952
BTRC	-0.0051116	0.0982402	-0.284009	0.0779435	-0.302241
2009-03-01	0.010787	0.000108894	0.607465	0.0118891	0.423249
DLEU1	0.0107858	0.000334475	0.571629	0.0694663	0.310924
BUB3	0.00117035	0.707577	0.0657239	0.871769	-0.0282913
BUD13	0.00550811	0.158157	0.24379	0.944308	0.0123249
BUD31	0.00235447	0.813456	0.0413715	0.953259	-0.0103641
UNC5B	0.0107761	4.55e-05	0.63262	0.000778059	0.548739
BYSL	-0.000533293	0.451728	-0.131422	0.418916	-0.140616
BZRAP1	0.00487899	0.0863289	0.294133	0.0907001	0.290476
C19orf48	0.0107749	0.000142292	0.599298	0.0205697	0.391877
BZW2	0.00494866	0.269285	0.191958	0.327467	0.170028
TTLL9	0.0107709	8.29e-05	0.615573	0.00462947	0.471709
WDHD1	0.0107633	3.17e-05	0.642474	0.000502873	0.565266
C10orf107	0.003727	0.213485	0.215628	0.0936333	0.287955
C10orf11	-0.00364608	0.116782	-0.269967	0.0289587	-0.370868
C10orf118	-0.00529331	0.205669	-0.219268	0.57946	-0.0966387
C10orf12	-0.00381825	0.329443	-0.169811	0.771821	-0.0507003
COPG1	0.0107604	0.000242365	0.582352	0.0540637	0.329132
C10orf2	0.00355314	0.442565	0.134075	0.235757	0.205322
C10orf25	-0.000466938	0.749943	-0.0558593	0.485146	-0.121569
RHEBL1	0.0107603	2.58e-05	0.647926	4.14e-05	0.646499
C10orf32-ASMT	0.00453482	0.196756	0.223538	0.499107	0.118136
COL13A1	0.0107572	3e-05	0.643918	3.98e-06	0.709244
OSBPL3	0.0107511	1.43e-05	0.662845	2.13e-06	0.72605
C10orf55	0.00557019	0.0662822	0.313928	0.122623	0.265826
C10orf76	-0.00593842	0.0411255	-0.346999	0.00715281	-0.45014
C10orf82	0.000902871	0.961515	0.00846336	0.909855	-0.019888
C10orf88	0.000513914	0.998033	-0.000432371	0.969897	0.00672269
C11orf1	-0.000544829	0.398007	-0.147434	0.0180126	-0.39972
C11orf21	-0.00612358	0.0848866	-0.29543	0.175193	-0.234174
C11orf24	0.00473574	0.159552	0.242999	0.123029	0.265546
C11orf30	-0.00365752	0.135208	-0.257583	0.479091	-0.123249
ZFP64	0.0107511	0.0001552	0.596599	0.00662123	0.454062
C11orf35	0.000661018	0.988394	0.00255139	0.557561	0.102241
DLGAP5	0.0107499	3.55e-05	0.639424	8.1e-06	0.690756
PRR19	0.0107475	0.000149398	0.597786	0.00892646	0.438655
ARMCX6	0.0107471	6.85e-05	0.621091	0.00217203	0.506443
C11orf52	0.00176317	0.874906	-0.0276082	0.636992	-0.0823529
C11orf54	-0.00686182	0.00746379	-0.444526	0.00751364	-0.447619
C11orf57	0.00202747	0.646217	0.0803826	0.137442	0.256022
ZKSCAN4	0.0107444	2.75e-05	0.646182	3.98e-05	0.647619
SPC25	0.0107432	7.48e-05	0.618582	0.00141741	0.52465
C11orf65	-0.00299218	0.15328	-0.246593	0.0289587	-0.370868
C11orf68	0.00400946	0.243195	0.202569	0.875566	-0.027451
C11orf70	-0.0043751	0.101879	-0.281104	0.0117082	-0.42409
C11orf71	0.00132952	0.990469	0.00209519	0.56191	-0.10112
C11orf72	0.00519544	0.239927	0.20395	0.816447	0.0406162
C11orf73	0.00165907	0.94191	-0.0127808	0.203018	-0.220168
C11orf74	-0.00434812	0.0573599	-0.324288	0.038197	-0.352941
PLEKHN1	0.0107398	4.68e-05	0.631863	0.000295854	0.584314
CD1A	0.010737	4.77e-05	0.631351	0.0088353	0.436025
MFSD3	0.0107368	0.000103523	0.608984	0.0346328	0.359384
C11orf84	0.00667457	0.0499033	0.333977	0.325054	0.170868
NCAPD2	0.0107363	4.34e-05	0.633946	0.00137037	0.52605
EDAR	0.0107333	4.71e-05	0.631665	0.000833276	0.539093
C12orf23	-0.00204192	0.862527	-0.0303651	0.487174	0.121008
C12orf29	-0.00673363	0.0216773	-0.38689	0.0515465	-0.332493
CHAF1B	0.0107297	9.05e-05	0.612984	0.0445572	0.342577
C12orf4	-0.00104837	0.555093	-0.103235	0.580565	-0.0963585
C12orf43	-0.00686661	0.00853147	-0.437806	0.00482135	-0.469748
C12orf44	0.00228158	0.864603	0.0299024	0.795293	-0.0453782
C12orf45	0.00233553	0.642201	0.0813602	0.641601	-0.0812325
C12orf49	-0.00532725	0.101777	-0.281184	0.587216	-0.0946779
C12orf5	-0.000649444	0.895616	-0.0230099	0.912402	0.0193277
C12orf50	-0.000758392	0.45968	-0.129142	0.231238	-0.207283
C12orf55	-0.00646446	0.0204805	-0.390215	0.0734721	-0.306723
FBN3	0.0107263	0.000100025	0.610012	0.00313459	0.485188
C12orf57	0.00392304	0.177888	0.233047	0.243643	0.201961
C12orf60	0.005075	0.134622	0.257957	0.294701	0.181793
FAM86C1	0.0107201	0.00018118	0.591727	0.0116485	0.42437
ST6GALNAC2	0.0107201	3.81e-05	0.637506	0.00126305	0.529412
C12orf66	-0.000822094	0.627147	-0.0850458	0.995516	-0.00112045
C12orf68	0.0029783	0.325435	0.171203	0.44748	0.132213
KLHDC8A	0.0107169	2.56e-05	0.648104	2.3e-05	0.663025
C12orf75	-0.00131906	0.864066	0.0300221	0.102167	0.280952
XKR7	0.0107095	3.99e-05	0.636212	0.0013804	0.51958
SHCBP1	0.0107088	2.37e-05	0.65011	1.09e-05	0.682913
ESCO2	0.0107082	5.23e-05	0.628787	7.81e-05	0.627731
C14orf119	0.00535182	0.174519	0.234818	0.419851	0.140336
C14orf132	-0.00226423	0.987387	0.00277278	0.431164	0.136975
HMMR	0.0107068	4.66e-05	0.63197	2.93e-05	0.656303
C14orf159	-0.00563214	0.0229334	-0.38356	0.0398378	-0.35014
C14orf166	-0.000890707	0.403668	-0.145692	0.127562	-0.262465
CDCA7	0.0107031	9.47e-06	0.672938	4.56e-05	0.643697
C14orf182	0.00393905	0.144431	0.251849	0.101814	0.281232
C14orf2	0.00221019	0.695768	0.068508	0.668358	-0.0747899
C14orf23	-0.00108579	0.502092	-0.117322	0.223866	-0.210932
EME1	0.0107002	4.77e-05	0.631306	0.00126305	0.529412
C14orf37	-0.0051676	0.174696	-0.234725	0.823946	0.0389356
C14orf64	-0.0045303	0.160332	-0.24256	0.196073	-0.223529
SPC24	0.0106979	7.46e-05	0.618648	0.000438284	0.570308
RPUSD1	0.0106979	0.000199703	0.588622	0.0287029	0.371429
C14orf93	0.0059479	0.0691582	0.310823	0.647381	0.0798319
DPY30	0.0106977	0.000459357	0.560694	0.0534253	0.329972
FOXS1	0.0106962	5.57e-05	0.626973	0.000191427	0.59916
C15orf38-AP3S2	0.00265664	0.816388	0.0407101	0.638143	-0.0820728
C15orf39	0.00421666	0.372983	0.155314	0.623246	0.0857143
C15orf40	-0.002388	0.267511	-0.192658	0.0503238	-0.334174
C15orf41	0.00233212	0.39493	0.148387	0.490223	0.120168
TUBB	0.0106952	0.000222778	0.585097	0.0337494	0.361064
CDH6	0.0106951	0.000145106	0.598692	0.00221409	0.505602
C15orf57	-0.00179241	0.394502	-0.14852	0.381606	-0.152101
CD47	0.0106907	5.02e-05	0.629927	0.000268548	0.587675
C15orf61	-0.000690996	0.534247	-0.108694	0.137884	-0.255742
SLC39A4	0.010687	0.000109712	0.607239	0.0997194	0.282913
SNRPC	0.0106862	0.000308547	0.57435	0.0501224	0.334454
UBXN10	0.0106855	5.62e-05	0.626717	4.52e-05	0.643978
FAM187A	0.0106843	0.000175989	0.592648	0.0702533	0.310084
C16orf46	-0.00528098	0.0489932	-0.335238	0.0386833	-0.352101
C1orf35	0.0106837	0.000154891	0.596661	0.0194388	0.395238
C16orf54	-0.0055971	0.159259	-0.243165	0.558647	-0.101961
C16orf58	0.00181886	0.761189	0.05327	0.181065	-0.231092
VANGL1	0.010683	8.24e-05	0.615757	0.000558828	0.561345
C16orf62	-0.00474525	0.0688538	-0.311147	0.0187143	-0.397479
RGS14	0.0106805	0.000137952	0.600255	0.040341	0.3493
C16orf71	0.00363714	0.461762	0.128549	0.597255	-0.0921569
ERCC6L	0.0106746	6.33e-05	0.623348	0.00095692	0.540616
PFDN6	0.0106731	0.000369638	0.568225	0.118224	0.268908
C16orf80	-0.0037901	0.0917751	-0.289379	0.0266035	-0.37619
C16orf86	-0.00535752	0.0578609	-0.323673	0.0582505	-0.32381
C16orf87	-0.0026703	0.468037	-0.12677	0.69434	-0.0686275
ZBTB42	0.0106695	0.000225104	0.58476	0.0189832	0.396639
C16orf91	0.000677377	0.747581	-0.0564045	0.534995	-0.108123
DEPDC1	0.0106658	3.64e-05	0.63873	2.14e-05	0.664986
C16orf95	-0.00582826	0.0144988	-0.409777	0.000355213	-0.577871
C17orf100	0.00140941	0.655048	0.0782419	0.894917	-0.0231647
MORN3	0.0106653	4.36e-05	0.633828	0.00031541	0.582073
SCNN1A	0.0106597	0.000109745	0.60723	0.00354706	0.484314
C17orf107	-0.00220994	0.477546	-0.124096	0.460181	-0.128571
KCNH2	0.0106593	0.000136851	0.600502	0.00176519	0.515406
CPLX2	0.0106588	0.000144143	0.598898	0.00186838	0.507296
C17orf53	0.00479044	0.209076	0.21767	0.898404	0.022409
C17orf58	-0.0066861	0.0104067	-0.427569	0.00168572	-0.517367
C17orf59	0.00524618	0.0477772	0.336951	0.136561	0.256583
FANCD2	0.0106587	4.64e-05	0.632071	0.000161571	0.604762
C17orf67	-0.00448604	0.0849621	-0.295362	0.0515465	-0.332493
PPEF1	0.0106533	4.15e-05	0.635174	4.87e-05	0.63077
C17orf72	0.00457967	0.182834	0.230488	0.216809	0.213725
C17orf75	0.00085515	0.612254	0.0887279	0.551068	0.103922
HMGN2	0.0106532	0.000310576	0.57413	0.0331708	0.362185
C17orf82	0.00241204	0.31341	0.175444	0.23188	0.207003
HIST1H2BD	0.0106446	0.000131217	0.601796	0.00465647	0.471429
C17orf89	0.000511482	0.586863	-0.0950942	0.0338953	-0.360784
C17orf96	4.89e-05	0.764842	-0.0524313	0.696719	-0.0680672
C17orf97	0.0016995	0.620467	0.0866927	0.558647	0.101961
C18orf21	0.00158996	0.936024	0.0140783	0.724289	-0.0616247
C18orf25	-0.0040866	0.15315	-0.246668	0.159878	-0.242577
C18orf32	-0.00683007	0.0193494	-0.39351	0.112419	-0.273109
C18orf54	4.71e-05	0.837881	0.0358762	0.865446	0.0296919
H1F0	0.0106424	6.1e-05	0.624432	0.000303057	0.583473
C19orf10	0.00337032	0.494612	0.119368	0.889512	-0.0243697
CLDN4	0.0106413	0.000119337	0.604694	0.0031035	0.490476
C19orf24	0.00412355	0.415157	0.142197	0.671879	-0.0739496
C19orf25	0.00670851	0.0448794	0.341181	0.432114	0.136695
C19orf26	-0.00519623	0.0720277	-0.307825	0.284268	-0.185714
C19orf33	0.00686999	0.0561623	0.325774	0.152121	0.247059
IGFBP2	0.0106399	0.000103194	0.609079	0.000448506	0.569468
C19orf38	-0.00687324	0.0179548	-0.3978	0.0138325	-0.414846
PRSS1	0.0106398	0.000140778	0.599629	0.000516722	0.55654
C19orf43	-0.00045393	0.579024	-0.0970841	0.228046	-0.208683
C19orf44	0.00697572	0.0341933	0.358979	0.276966	0.188515
C19orf47	0.00630356	0.127585	0.262544	0.720673	0.062465
PLCH1	0.0106347	4.54e-05	0.63267	0.000268548	0.587675
C19orf52	0.00380115	0.227315	0.209405	0.39052	0.1493
C19orf53	0.00557883	0.105269	0.278467	0.636992	0.0823529
C19orf54	0.00215131	0.815329	0.040949	0.542468	-0.106162
COMP	0.0106297	5.94e-05	0.625185	0.00011922	0.614566
KRT23	0.0106295	0.000135329	0.600847	0.00240473	0.501961
C19orf59	-0.00477034	0.100814	-0.281946	0.233167	-0.206443
C19orf60	0.00332901	0.471689	0.125739	0.551068	-0.103922
C19orf66	-0.00199264	0.414761	-0.142317	0.388727	-0.14986
C19orf68	0.00279862	0.316297	0.174417	0.578356	0.0969188
C19orf70	-0.00220845	0.250463	-0.19954	0.010398	-0.430532
GALNT5	0.0106294	8.9e-06	0.674401	3.39e-07	0.741929
FBXL19	0.0106283	0.000199676	0.588627	0.00198489	0.510364
C19orf82	0.00596229	0.0606065	0.32038	0.229319	0.208123
C1D	-0.00545375	0.0800424	-0.299916	0.324252	-0.171148
KDM1A	0.0106249	0.000240089	0.58266	0.0369247	0.355182
C1GALT1C1	-0.00433352	0.0451745	-0.34074	0.0121958	-0.421849
C1orf101	-0.00664057	0.0108697	-0.425286	0.0178407	-0.40028
C3orf67	0.0106242	0.00010623	0.60821	0.000231802	0.592717
C1orf109	0.000289486	0.933122	0.0147184	0.998078	0.000560224
CSTF1	0.0106111	0.000211523	0.586773	0.00444426	0.473669
CASP6	0.0106108	7.23e-05	0.619535	0.00297293	0.492437
SLC2A9	0.0106083	4.55e-05	0.63266	0.000124583	0.613165
C1orf122	0.00313303	0.536526	0.108092	0.765676	-0.0521008
CD82	0.0106009	0.00012477	0.603338	0.00727139	0.4493
C1orf127	0.00416627	0.112442	0.273094	0.102047	0.280972
C1orf131	0.00413517	0.285457	0.185717	0.501488	0.117087
ALPP	0.0105966	0.000325086	0.572592	0.0025549	0.4941
C1orf159	0.00479371	0.278464	0.188387	0.921324	0.0173669
C1orf162	-0.00253382	0.466246	-0.127276	0.373689	-0.154622
C1orf167	0.00064548	0.922514	0.0170596	0.903491	0.0212885
CTCFL	0.0105956	0.000149793	0.597704	0.00275636	0.49082
RNASET2	0.0105932	7.57e-05	0.618232	0.000963688	0.540336
C1orf173	0.00427302	0.168637	0.237971	0.867424	0.0292738
LCN12	0.0105929	0.000149973	0.597667	0.0176702	0.40084
IGF2BP3	0.010591	2.4e-05	0.649756	7.8e-07	0.758543
PLEK2	0.010591	0.000157686	0.596102	0.000499074	0.565546
C1orf198	-0.00489621	0.0305661	-0.366059	0.0100776	-0.432213
C1orf204	0.00310937	0.255424	0.197506	0.259948	0.195238
LAMB3	0.0105905	0.0004341	0.562671	0.0551412	0.327731
LRP8	0.0105875	9.89e-05	0.610363	0.00308455	0.490756
C1orf213	-0.00572137	0.0406765	-0.347723	0.0100251	-0.432493
C1orf216	0.00098523	0.745687	0.056842	0.547836	0.104762
C1orf226	0.00146704	0.993693	0.00138643	0.920049	-0.0176471
C1orf228	-0.00103731	0.895179	-0.0231067	0.927703	0.0159664
C1orf229	-0.00331086	0.294868	-0.18219	0.284268	-0.185714
ZNF14	0.0105804	4.38e-05	0.633659	0.000761368	0.54958
UQCC2	0.0105711	0.000327697	0.572321	0.0734721	0.306723
FAM64A	0.010567	9e-05	0.613143	0.000171508	0.602801
C1orf43	6.51e-05	0.442012	-0.134236	0.0343362	-0.359944
C1orf50	0.00235711	0.515639	0.113655	0.462153	-0.128011
C1orf51	-0.00305373	0.18952	-0.227106	0.771821	-0.0507003
CELF4	0.0105639	0.000107091	0.607967	0.0176702	0.40084
C1orf53	0.00376848	0.360077	0.159499	0.867974	0.0291317
C1orf54	-0.00692918	0.0409437	-0.347291	0.559734	-0.101681
C1orf56	-0.00270406	0.150721	-0.248089	0.0139017	-0.414566
C1orf61	0.00340428	0.3083	0.177277	0.663674	0.0759104
C1orf63	0.00554882	0.06583	0.314426	0.635841	0.0826331
MKI67	0.0105612	5.74e-05	0.62614	3.37e-05	0.652381
HYLS1	0.0105579	0.000293324	0.576044	0.0117683	0.42381
BLM	0.0105536	5.8e-05	0.625847	0.00128916	0.528571
SKA1	0.0105451	5.65e-05	0.626602	6.31e-05	0.634174
C1QA	-0.00490052	0.0923083	-0.288926	0.0697278	-0.310644
C1QB	-0.00304116	0.3285	-0.170137	0.262036	-0.194398
C1QBP	0.000851191	0.867107	-0.0293443	0.903491	-0.0212885
C1QC	-0.0027758	0.369516	-0.156429	0.186525	-0.228291
C1QL1	-0.00600825	0.0257382	-0.376638	0.0540637	-0.329132
ISYNA1	0.0105383	0.000268795	0.578947	0.00810607	0.443697
HELLS	0.0105285	5.69e-05	0.626409	2.81e-05	0.657423
C1QTNF2	-0.00572874	0.109198	-0.275491	0.580565	-0.0963585
C1QTNF3	0.00233906	0.30584	0.178167	0.16639	0.238936
IL17RB	0.0105261	3.51e-05	0.639729	1.89e-05	0.668347
C1QTNF5	0.00143961	0.742907	0.0574849	0.930256	0.0154062
KNOP1	0.0105253	0.000155319	0.596575	0.0227865	0.385714
C1QTNF7	-0.00518451	0.13948	-0.254892	0.55431	0.103081
HAPLN4	0.0105239	5.71e-05	0.626298	0.00137025	0.519874
GPR68	0.0105183	2.7e-05	0.646699	0.000224276	0.593838
NELFA	0.0105146	0.000402062	0.565332	0.0796743	0.30056
C20orf96	0.0105138	9.8e-05	0.610633	0.00260961	0.498319
KDM4D	0.0105009	0.000127833	0.602596	0.0055958	0.462465
C2	-0.00120428	0.748541	-0.0561828	0.989109	-0.00252101
STAP2	0.0105008	0.00024531	0.581956	0.0126365	0.419888
PSAT1	0.0104977	0.00010758	0.60783	0.00490568	0.468908
C20orf195	0.0069487	0.0108818	0.425227	0.138452	0.255534
WDR54	0.0104968	0.000166153	0.594462	0.00168572	0.517367
ZNF610	0.0104963	0.000123888	0.603554	0.00197208	0.510644
C20orf24	0.00494277	0.232851	0.206986	0.418916	0.140616
WFDC2	0.0104948	0.000103366	0.60903	0.00145606	0.523529
C20orf27	0.000533373	0.569137	-0.0996109	0.0420563	-0.346499
NMRAL1	0.0104937	0.000119107	0.604753	0.00281214	0.494958
KIF15	0.0104927	6.47e-05	0.622723	4.18e-05	0.646218
C21orf119	0.00387877	0.377079	0.154003	0.501488	-0.117087
HIST1H2BN	0.0104924	0.000434332	0.562653	0.00595456	0.459384
C21orf33	-0.00111636	0.285169	-0.185826	0.0154994	-0.408403
C21orf49	-0.0029821	0.34103	-0.165845	0.115101	-0.271148
ZNF691	0.0104885	0.00026753	0.579102	0.00763735	0.446779
C21orf59	0.00544452	0.27133	0.191156	0.955817	-0.00980392
TBX19	0.0104823	5.97e-05	0.625032	0.00352576	0.484594
C21orf67	0.00546899	0.20157	0.221216	0.95198	0.0106443
C21orf90	0.00281102	0.33858	0.166676	0.749768	0.0557423
C21orf91	0.00077636	0.767612	0.0517962	0.300009	0.179832
C22orf26	0.00136302	0.42746	0.138516	0.300773	0.179552
TMEM79	0.0104787	0.000152877	0.597069	0.00731129	0.44902
SOX9	0.0104774	0.000295006	0.575853	0.00926422	0.436695
HPDL	0.0104718	0.000187837	0.59058	0.00314172	0.489916
C22orf46	-0.00597993	0.0207578	-0.389431	0.0104523	-0.430252
SLC7A11	0.0104689	0.000166665	0.594365	0.00192158	0.511765
C2CD2L	0.00333319	0.453405	0.130939	0.94303	0.012605
VPS37D	0.0104651	0.000140519	0.599686	0.000789365	0.548179
C2CD4A	-0.0056471	0.0409219	-0.347326	0.0713136	-0.308964
CAMSAP3	0.0104648	0.000117438	0.605181	0.00108543	0.535574
ANP32A	0.0104639	0.000735784	0.543728	0.226146	0.209524
C2CD5	-0.00429341	0.217188	-0.213935	0.71586	-0.0635854
C2orf15	0.00692371	0.0716378	0.308227	0.668358	0.0747899
AKR1A1	0.0104634	0.000159114	0.59582	0.0293459	0.370028
VGLL1	0.0104628	9.1e-05	0.612809	0.00167583	0.511763
C2orf42	0.00135871	0.937907	0.0136632	0.775514	0.0498599
C2orf43	-0.00600028	0.019816	-0.392132	0.085048	-0.295518
MARCKSL1	0.0104619	0.000235039	0.583354	0.0101304	0.431933
C2orf47	0.000116588	0.659828	-0.0770878	0.258562	-0.195798
C2orf49	-0.00541449	0.086504	-0.293977	0.322652	-0.171709
NEIL3	0.0104603	0.000105082	0.608536	0.000286107	0.576875
BCAM	0.0104592	0.000629314	0.549458	0.0458522	0.340616
LSM4	0.0104587	0.000540598	0.554931	0.283533	0.185994
C2orf72	-0.00382188	0.136774	-0.256589	0.0878505	-0.292782
C2orf74	0.00134166	0.818929	0.0401371	0.559734	-0.101681
CHST10	0.0104534	0.000348378	0.570246	0.00801905	0.444258
JUP	0.0104451	0.000631043	0.549358	0.18763	0.227731
ELF3	0.0104416	0.000203267	0.588055	0.00218598	0.506162
C2orf88	0.00696951	0.019521	0.393	0.842758	-0.0347339
CLEC5A	0.0104402	0.000127451	0.602688	0.000387189	0.57479
C3AR1	-0.00306212	0.464631	-0.127734	0.204193	-0.219608
C3orf14	0.0055757	0.0386917	0.351004	0.00449651	0.473109
C3orf17	0.00402756	0.329218	0.169889	0.233813	0.206162
C3orf18	-0.00531371	0.0775432	-0.302314	0.0460397	-0.340336
C3orf33	-0.00600722	0.0163533	-0.403085	0.0017081	-0.516807
C3orf36	-0.00636219	0.0213395	-0.387813	0.156449	-0.244538
C3orf38	0.00405673	0.0851648	0.295179	0.335593	0.167227
RNF5	0.0104389	0.000591899	0.551677	0.0607907	0.320728
SLC39A11	0.0104286	0.000121008	0.604271	0.00286487	0.494118
SNRPD2	0.0104234	0.000504326	0.557402	0.119015	0.268347
CAPS	0.0104216	6.88e-05	0.620984	0.00107791	0.535854
SNAP47	0.0104179	0.000394613	0.565978	0.0316219	0.365266
DPEP1	0.0104133	0.000102557	0.609265	0.000369617	0.568226
MICB	0.010413	3.34e-05	0.64106	0.00731129	0.44902
C4A	-0.00689944	0.0202676	-0.390823	0.0511363	-0.333053
XXYLT1	0.0104126	0.000116833	0.605338	0.000132455	0.611204
C4BPA	-0.00698564	0.0206618	-0.389701	0.021966	-0.386111
EFNA3	0.0104123	0.000102713	0.609219	9.8e-05	0.620728
RAD18	0.0104089	0.000143705	0.598992	0.00142698	0.52437
C4orf21	0.0064042	0.0203343	0.390632	0.0773732	0.302801
C4orf27	-0.00158082	0.511069	-0.114886	0.174666	-0.234454
IL21R	0.0104077	5.39e-05	0.627931	2.42e-05	0.661625
SLC25A38	0.0104063	0.000338373	0.571236	0.0196235	0.394678
ZFP62	0.0104058	7.14e-05	0.619911	0.00180025	0.514566
MAPK8IP1	0.0104026	0.00013968	0.599871	0.000522257	0.563866
ZNF439	0.0103927	4.18e-05	0.634968	5.74e-06	0.69972
C4orf46	0.00649026	0.00896254	0.435295	0.0171668	0.402521
C4orf47	0.00215251	0.363353	0.158428	0.263434	0.193838
C4orf48	0.00525404	0.105695	0.278141	0.279144	0.187675
E2F7	0.0103921	0.000107436	0.607871	0.000566428	0.55326
ZNF526	0.0103904	0.000342084	0.570866	0.0065846	0.454342
NREP	0.0103872	1.79e-05	0.657264	3.54e-06	0.712325
C5orf15	-0.00048682	0.918343	-0.017981	0.9226	-0.0170868
C5orf22	0.00291569	0.387317	0.150763	0.359003	0.159384
IDH2	0.0103867	0.000361257	0.569009	0.105742	0.278151
ZDHHC13	0.0103864	0.000273835	0.578331	0.0228919	0.385434
C5orf28	0.00266199	0.348612	0.163294	0.181065	0.231092
C5orf30	-0.00519688	0.0339691	-0.359399	0.0154235	-0.408683
FAM174B	0.010386	0.000692612	0.545957	0.0603224	0.321289
C5orf42	-0.00639409	0.0328718	-0.361484	0.267659	-0.192157
C5orf45	0.00177089	0.637476	0.0825132	0.695529	-0.0683473
CCDC160	0.0103858	0.000118837	0.604822	0.000161571	0.604762
C5orf51	-0.00689901	0.0319771	-0.363227	0.0776579	-0.302521
ADAMDEC1	0.0103783	2.61e-05	0.647552	6.74e-06	0.695518
C5orf55	0.00167592	0.944231	-0.0122694	0.31709	-0.173669
C5orf56	-0.0036635	0.199459	-0.22223	0.114715	-0.271429
C5orf63	-0.00323356	0.157442	-0.244197	0.188185	-0.227451
GCAT	0.0103779	0.000338305	0.571243	0.0375565	0.354062
INHBA	0.0103756	9.46e-05	0.611671	2.96e-05	0.656022
C6orf106	-0.00249501	0.158175	-0.24378	0.00462947	-0.471709
GABRA3	0.0103719	0.000162752	0.595111	0.00148009	0.516791
C6orf123	-0.00152976	0.426016	-0.138945	0.294701	-0.181793
C6orf132	0.00627843	0.0656675	0.314605	0.056236	0.326331
CLDN9	0.010369	0.000181342	0.591698	0.0173243	0.399832
KIAA1211	0.0103689	2.59e-05	0.647752	1.59e-06	0.734454
RRM2	0.0103681	0.00010059	0.609844	5.47e-05	0.638375
C6orf203	-0.00238923	0.198499	-0.222693	0.0513411	-0.332773
C6orf211	-0.00425586	0.274503	-0.189919	0.217423	-0.213445
KIF18A	0.0103673	7.63e-05	0.617985	0.00171938	0.516527
C6orf226	-0.00687835	0.0134787	-0.413771	0.0612619	-0.320168
C6orf25	-0.00333724	0.315218	-0.1748	0.37544	-0.154062
C6orf47	0.00368469	0.435029	0.13628	0.524408	0.110924
C6orf48	0.00687558	0.0104037	0.427584	0.0317602	0.364986
GPR89B	0.0103665	0.000522946	0.556115	0.0431137	0.344818
C6orf57	-0.00197399	0.235399	-0.205886	0.0203775	-0.392437
C6orf62	-0.00436049	0.140978	-0.253963	0.166899	-0.238655
AOC1	0.0103657	0.000142047	0.599352	0.000593229	0.559104
CST1	0.0103636	0.000198263	0.588854	1.55e-05	0.660901
CBX1	0.0103636	9.66e-05	0.611049	0.00855344	0.440896
C7orf25	-0.00602655	0.0871491	-0.293403	0.220511	-0.212045
TBC1D31	0.010363	0.000175548	0.592727	0.00669501	0.453501
C7orf31	-0.00292333	0.326565	-0.170809	0.873034	0.0280112
C7orf43	0.00374215	0.282658	0.18678	0.312372	0.17535
SETDB1	0.0103629	0.000228286	0.584304	0.0289587	0.370868
C7orf50	0.00669145	0.054534	0.327835	0.319466	0.172829
C7orf55	-0.00435241	0.0912498	-0.289828	0.0420563	-0.346499
C7orf55-LUC7L2	-0.00165894	0.347239	-0.163753	0.378956	-0.152941
C7orf60	-0.00160285	0.903285	0.0213111	0.377195	0.153501
EXOSC5	0.0103614	0.000891511	0.536548	0.385157	0.15098
C7orf73	0.00673853	0.0164526	0.402745	0.0178407	0.40028
C8orf31	0.00477722	0.0634603	0.317079	0.0471776	0.338655
C8orf33	0.000684873	0.771215	-0.0509709	0.11318	-0.272549
FIBP	0.0103612	0.000579466	0.552442	0.0278224	0.373389
C8orf37	-0.00485093	0.12458	-0.264561	0.0679132	-0.312605
C8orf4	-0.000120499	0.585187	-0.0955187	0.700294	-0.0672269
C8orf44	0.00621938	0.0738241	0.305995	0.618692	0.0868347
C8orf44-SGK3	0.000903046	0.526313	0.110799	0.297491	0.181219
USP28	0.0103572	0.000137703	0.600311	0.000904267	0.542857
C8orf47	0.00469384	0.210549	0.216984	0.583886	0.0955182
C8orf48	0.00497731	0.109449	0.275304	0.432114	0.136695
C8orf58	0.000319538	0.918264	0.0179984	0.885705	-0.0252101
C8orf59	0.00152951	0.889205	0.0244315	0.934086	0.0145658
ANKZF1	0.0103568	0.000190041	0.590208	0.00163089	0.518768
C8orf82	0.00549368	0.145513	0.251193	0.879366	-0.0266106
ALG3	0.0103531	0.000787738	0.541195	0.182148	0.230532
C9orf114	0.00425677	0.374727	0.154755	0.936641	-0.0140056
PDCD2L	0.010353	0.000516131	0.556581	0.0983413	0.284034
RPS6KA1	0.0103526	5.77e-05	0.62598	0.00168572	0.517367
EMC10	0.0103519	0.00046677	0.560132	0.0114708	0.42521
LRRC46	0.0103512	0.000440712	0.562144	0.167408	0.238375
NSUN5	0.0103501	0.000419285	0.563879	0.024972	0.380112
DBNDD1	0.0103499	0.000468835	0.559977	0.0346328	0.359384
C9orf172	0.00193815	0.43889	0.135148	0.306924	0.177311
C9orf24	0.00313701	0.323482	0.171885	0.442675	-0.134043
C9orf3	0.00378658	0.265055	0.193631	0.138327	0.255462
AP1M2	0.0103446	0.000229838	0.584083	0.00276026	0.495798
RCC1	0.0103329	0.000473944	0.559596	0.0320383	0.364426
C9orf41	-0.00454425	0.157508	-0.244159	0.167919	-0.238095
C9orf43	0.00587672	0.0657254	0.314541	0.351373	0.161905
KIAA0101	0.0103327	0.000115188	0.605768	3.47e-05	0.651541
C9orf64	-0.00599723	0.0719097	-0.307946	0.126728	-0.263025
OVOL1	0.0103316	0.00018739	0.590655	0.000501067	0.557632
C9orf69	0.00320471	0.552718	0.103852	0.677764	-0.072549
APEX2	0.0103306	0.0004544	0.561075	0.043471	0.344258
C9orf78	-0.00263444	0.30183	-0.179626	0.165376	-0.239496
C9orf85	-0.00462578	0.12036	-0.267454	0.190976	-0.22605
C9orf89	-0.00281727	0.225279	-0.210304	0.992953	0.00168067
C9orf9	0.000791763	0.929226	-0.015578	0.419851	-0.140336
C9orf91	-0.00644751	0.023396	-0.382372	0.00572403	-0.461345
C9orf96	-0.00102405	0.468188	-0.126727	0.168945	-0.237535
MCM7	0.0103291	0.000341982	0.570876	0.095965	0.285994
CA12	-0.0047537	0.0715911	-0.308275	0.0891016	-0.291877
ITM2C	0.0103271	0.000122234	0.603964	0.00801905	0.444258
CA14	0.00465362	0.2224	0.211586	0.508725	0.115126
CA2	-0.00214679	0.506116	-0.116227	0.55431	-0.103081
RNFT2	0.0103266	0.00027222	0.578527	0.0141813	0.413445
ENTPD8	0.0103262	6.61e-05	0.622108	6.16e-05	0.624124
GPR27	0.0103234	0.000120413	0.604421	0.0065846	0.454342
CA8	0.00210938	0.51318	0.114317	0.740029	-0.0579832
CA9	-0.00345418	0.138624	-0.255426	0.0793838	-0.30084
CAAP1	-0.0069678	0.0200013	-0.391592	0.132648	-0.259104
PRKX	0.0103234	0.000191018	0.590044	0.00084207	0.545658
RPS19	0.0103205	0.000378948	0.567372	0.0115297	0.42493
RPS10	0.0103189	0.000306822	0.574538	0.0279468	0.373109
CABLES1	-0.00453691	0.0670996	-0.313035	0.00374387	-0.481793
LTB	0.0103187	0.000102676	0.60923	0.000469591	0.567787
DTL	0.0103173	5.45e-05	0.627609	0.000222428	0.594118
CABP4	0.00470309	0.159011	0.243306	0.2748	0.189356
LYPLA2	0.0103125	0.000760941	0.542482	0.0386833	0.352101
ZNF607	0.0103068	0.000117038	0.605285	0.000824165	0.546499
DNAL4	0.0103059	0.000829531	0.539262	0.123844	0.264986
CACNA1A	0.00256904	0.535284	0.10842	0.904764	-0.0210084
LMTK3	0.0103021	0.000142308	0.599295	0.00169687	0.517087
YIF1B	0.0102995	0.000645586	0.548529	0.0785171	0.301681
CACNA1D	0.00689245	0.00370615	0.477708	0.000124583	0.613165
VAV2	0.0102992	0.000224014	0.584917	0.000522257	0.563866
C9orf16	0.0102973	0.000569864	0.553043	0.0197165	0.394398
CACNA1G	-0.00291417	0.587147	-0.0950225	0.335593	0.167227
SPOCK2	0.010297	0.000247433	0.581674	0.00251322	0.5
CACNA1I	-0.00150395	0.902858	-0.0214056	0.8743	0.0277311
C15orf62	0.0102946	0.000287433	0.576721	0.00165263	0.518207
CACNA2D2	-0.00448614	0.185535	-0.229111	0.360713	-0.158824
CACNA2D3	0.00184767	0.706581	0.0659581	0.954538	-0.010084
CACNA2D4	-0.00262724	0.244398	-0.202063	0.290947	-0.183193
ZNF296	0.0102904	0.000145891	0.598524	0.00279475	0.495238
POLE2	0.0102888	0.000108912	0.60746	0.000183532	0.60056
TMEM141	0.010287	0.000522394	0.556152	0.260643	0.194958
CACNB4	-0.00694824	0.0660769	-0.314154	0.827701	0.0380952
ACOT11	0.010285	0.000359715	0.569155	0.00462947	0.471709
CACNG6	0.00632531	0.0205889	0.389908	0.0466981	0.338501
CACNG8	0.00431521	0.253267	0.198387	0.468094	0.126331
CACTIN	-0.00364229	0.131012	-0.260287	0.0963018	-0.285714
CACUL1	-0.000831486	0.676898	-0.0729918	0.485146	-0.121569
ZNF85	0.0102838	4.4e-05	0.633536	8.56e-05	0.62493
RSPH1	0.0102811	0.000209016	0.587157	0.00971453	0.434174
GEMIN2	0.0102798	0.000726671	0.544189	0.0356873	0.357423
NR2F6	0.010275	0.000596271	0.551411	0.132648	0.259104
ZNF492	0.0102722	0.000156011	0.596436	0.085048	0.295518
CADM4	0.00482948	0.213257	0.215733	0.609626	0.0890756
CADPS	0.000902655	0.659284	0.077219	0.228046	0.208683
FEN1	0.01027	0.000202702	0.588144	0.0154235	0.408683
CALB1	2.9e-05	0.772484	0.0506805	0.202433	0.220448
CDK18	0.0102694	0.00030922	0.574277	0.00348349	0.485154
ZNF503	0.0102674	0.000642473	0.548705	0.00449651	0.473109
TLCD1	0.0102672	0.000580945	0.55235	0.0410202	0.348179
TMEM223	0.010265	0.000380124	0.567265	0.0707819	0.309524
CALCR	-0.00514694	0.0821481	-0.297941	0.0240777	-0.382353
RPGRIP1L	0.0102635	0.000195077	0.589372	0.00119569	0.531653
DYRK1B	0.0102627	0.000291424	0.576261	0.0114708	0.42521
CALHM2	5.63e-05	0.85424	0.0322148	0.886974	0.02493
PCNXL2	0.0102615	7.02e-05	0.620383	7.39e-05	0.629412
CALM2	-0.00256268	0.358567	-0.159995	0.3556	-0.160504
CALM3	0.00622166	0.0231557	0.382987	0.063906	0.317087
CALML4	0.00058693	0.985096	-0.00327656	0.641601	-0.0812325
KIF20B	0.0102594	0.000152853	0.597074	0.000750418	0.55014
ZWILCH	0.0102584	0.000123902	0.603551	1.02e-05	0.684874
CENPA	0.0102574	0.000203097	0.588081	0.000211628	0.595798
CALU	0.000928384	0.820989	0.0396729	0.285744	0.185154
AGR3	0.0102543	0.000188169	0.590523	0.0414597	0.346464
CAMK1D	-0.00472879	0.289481	-0.1842	0.779212	0.0490196
KLHDC7B	0.0102537	8.85e-05	0.613658	0.000697736	0.552941
CAMK2A	-0.00423058	0.30163	-0.179699	0.823946	0.0389356
FAM111B	0.0102535	6.93e-05	0.620766	0.000160194	0.605042
SH3BP5L	0.0102534	0.000457532	0.560834	0.117437	0.269468
CAMK2G	-0.00232045	0.374948	-0.154684	0.650859	-0.0789916
PCNXL3	0.0102534	0.000407998	0.564825	0.019531	0.394958
PRKCI	0.0102513	0.00039179	0.566225	0.00814988	0.443417
CAMK4	0.00328056	0.102613	0.280527	0.0872124	0.293557
CAMKK1	-0.00285308	0.442941	-0.133966	0.775514	-0.0498599
ADM2	0.0102482	0.000153086	0.597027	0.00139842	0.52521
CAMKMT	0.00113874	0.952965	0.0103456	0.512884	-0.114006
CAMLG	0.00118591	0.953031	0.010331	0.761997	0.0529412
CAMSAP1	-0.0012347	0.429235	-0.137989	0.610756	-0.0887955
BARD1	0.0102478	6.34e-05	0.623339	0.00137966	0.52577
BHLHE41	0.0102475	0.000247486	0.581667	0.00135194	0.526611
CAMTA1	0.00126962	0.91178	-0.0194315	0.599496	-0.0915966
PRR7	0.0102465	0.000409116	0.564731	0.0300007	0.368627
CAND1	0.00213562	0.457401	0.129793	0.506652	0.115686
CAND2	0.000806419	0.906501	0.0205992	0.994234	0.00140056
CANT1	0.00672595	0.078215	0.301663	0.9763	-0.00532213
CANX	-0.00166607	0.356896	-0.160545	0.44361	-0.133333
CAP1	-0.00163437	0.777684	-0.0494922	0.437841	-0.135014
CDK4	0.0102442	0.000887991	0.536698	0.0715806	0.308683
NVL	0.0102406	0.000456681	0.560899	0.159385	0.242857
SLAIN1	0.0102397	0.000254483	0.580751	0.0112953	0.42605
CAPN10	-0.00499339	0.074088	-0.305729	0.103586	-0.279832
SPP1	0.0102393	9.49e-05	0.611577	8.83e-06	0.688515
CAPN12	0.00692509	0.0120361	0.419878	0.022473	0.386555
DTYMK	0.0102391	0.00042905	0.563079	0.146024	0.2507
CAPN15	-0.000980157	0.560569	-0.101817	0.927703	0.0159664
CHCHD6	0.0102366	0.000107492	0.607855	0.010895	0.428011
CAPN3	-0.00568415	0.0845392	-0.295745	0.521252	-0.111765
KLK14	0.0102345	0.000253349	0.580898	0.0316032	0.363968
RARG	0.0102308	0.00033567	0.571508	0.00277746	0.495518
KREMEN2	0.0102298	0.000168068	0.594101	0.00557901	0.458716
CACFD1	0.0102294	0.000458671	0.560747	0.00281214	0.494958
CAPNS1	0.000590678	0.639995	-0.0818981	0.0589347	-0.322969
CAPRIN1	0.0037672	0.348801	0.16323	0.920049	0.0176471
CAPRIN2	-0.00623575	0.0411422	-0.346972	0.446511	-0.132493
SLC22A18AS	0.010229	0.000506622	0.557241	0.00084207	0.545658
ANO9	0.0102281	0.000114913	0.60584	0.000806599	0.547339
FANCI	0.0102181	0.00011777	0.605096	0.00164173	0.518487
CAPZA1	0.000402256	0.914313	-0.0188715	0.595017	-0.0927171
HMGA1	0.0102168	0.000576619	0.552619	0.0146097	0.411765
CAPZB	0.00164956	0.884338	0.0255118	0.737601	-0.0585434
CARD10	-0.00371234	0.173436	-0.235393	0.110159	-0.27479
KIF18B	0.010215	0.000112621	0.60645	0.000231802	0.592717
CBS	0.0102144	0.000461365	0.560541	0.015806	0.407283
CARD16	-0.000558831	0.790036	-0.0466776	0.371943	-0.155182
RAB39B	0.0102133	5.44e-05	0.627637	9.71e-05	0.621008
CCDC77	0.0102132	0.00031673	0.57347	0.00810607	0.443697
GNPDA1	0.0102102	0.000275308	0.578153	0.00626274	0.456863
CARF	-0.00355169	0.573852	-0.0984033	0.601741	0.0910364
CARHSP1	-0.00590091	0.01544	-0.406297	0.0055958	-0.462465
CARKD	-0.00578206	0.014948	-0.408093	0.0136267	-0.415686
CARM1	0.00467553	0.178838	0.232551	0.27408	0.189636
DFFB	0.0102099	9.13e-05	0.612719	0.000434923	0.570588
CARS	-0.00404812	0.0622225	-0.318496	0.0330275	-0.362465
CARS2	0.000325436	0.610507	-0.0891621	0.0180991	-0.39944
PTDSS1	0.0102088	0.00066809	0.547278	0.0440114	0.343417
CASC10	0.00368171	0.236803	0.205283	0.763223	-0.0526611
LRRTM1	0.0102085	0.000308539	0.574351	0.0188036	0.397199
CASC4	-0.00485741	0.178833	-0.232554	0.595017	0.0927171
C2orf81	0.0102027	0.000111589	0.606728	0.000158828	0.605322
TBCB	0.0102021	0.000582276	0.552268	0.017417	0.401681
CCDC137	0.0102012	0.000940766	0.534508	0.0337494	0.361064
GSG2	0.0101987	9.8e-05	0.610634	0.000251618	0.589916
RASSF9	0.0101959	0.00017333	0.593129	0.000228011	0.593277
CASP1	-0.000423401	0.893938	-0.0233817	0.2902	-0.183473
CASP10	-0.0015452	0.577805	-0.0973944	0.293196	-0.182353
CASP12	-0.00622145	0.0481777	-0.336383	0.210135	-0.216807
CDKN3	0.0101951	0.000222338	0.585161	0.000320476	0.581513
CASP3	-0.00028946	0.87104	0.0284683	0.551068	0.103922
CASP4	-0.00407357	0.0713777	-0.308496	0.0183606	-0.398599
HAUS5	0.0101932	0.000198405	0.588831	0.0436505	0.343978
CASP7	-0.00168245	0.446223	-0.133012	0.408708	-0.143697
CASP8	0.00527804	0.0782612	0.301619	0.243643	0.201961
CASP9	-0.00259366	0.361782	-0.158941	0.66017	-0.0767507
VDR	0.0101929	0.000247439	0.581673	0.00116322	0.532773
[truncated: 13,445 more rows]

## Sheet: Table S14
Supplementary Table 14: Gene Ontology enrichment analysis of DS associated genes - PLSR all genes vs disease score - loading weight > |0.007|
Enriched Gene Ontologies were identified by a modified Fisher’s exact test using the web-based tool PANTHER (version 10)(Mi et. al. 2016). Enrichment p-values were calculated with a modified Fisher's exact test and Bonferroni multiple testing correction. GO terms illustrated in supplemental figure 3B are highlighted.
GO biological process complete	# genes in GO term	# genes observed	# genes expected	fold enrichment	p-value
epithelial cell migration (GO:0010631)	69	50	24.06	2.08	0.0188
epithelium migration (GO:0090132)	72	51	25.11	2.03	0.0279
regulation of phospholipase activity (GO:0010517)	91	61	31.73	1.92	0.0188
mitotic prometaphase (GO:0000236)	99	65	34.52	1.88	0.0176
regulation of cyclin-dependent protein kinase activity (GO:1904029)	124	78	43.24	1.8	0.00906
response to mechanical stimulus (GO:0009612)	199	124	69.39	1.79	1.43e-05
regeneration (GO:0031099)	148	89	51.61	1.72	0.0103
negative regulation of kinase activity (GO:0033673)	220	131	76.72	1.71	7.04e-05
negative regulation of protein kinase activity (GO:0006469)	203	120	70.79	1.7	0.000416
renal system development (GO:0072001)	273	161	95.2	1.69	2.97e-06
second-messenger-mediated signaling (GO:0019932)	149	88	51.96	1.69	0.0233
negative regulation of protein phosphorylation (GO:0001933)	345	202	120.3	1.68	3.43e-08
urogenital system development (GO:0001655)	308	179	107.4	1.67	9.61e-07
protein autophosphorylation (GO:0046777)	191	111	66.6	1.67	0.00283
kidney development (GO:0001822)	257	149	89.62	1.66	3.78e-05
regulation of muscle system process (GO:0090257)	195	113	68	1.66	0.00256
gliogenesis (GO:0042063)	175	101	61.02	1.66	0.0123
negative regulation of phosphorylation (GO:0042326)	382	220	133.21	1.65	1.74e-08
response to hypoxia (GO:0001666)	270	155	94.15	1.65	3.52e-05
regulation of cell-substrate adhesion (GO:0010810)	169	97	58.93	1.65	0.0242
cell-substrate adhesion (GO:0031589)	160	92	55.79	1.65	0.0398
response to oxygen levels (GO:0070482)	296	169	103.22	1.64	1.06e-05
response to decreased oxygen levels (GO:0036293)	275	157	95.89	1.64	4e-05
vasculature development (GO:0001944)	470	267	163.89	1.63	3.5e-10
developmental growth (GO:0048589)	326	185	113.68	1.63	2.85e-06
regulation of epithelial cell proliferation (GO:0050678)	278	158	96.94	1.63	4.77e-05
negative regulation of cell migration (GO:0030336)	187	106	65.21	1.63	0.015
regulation of nucleocytoplasmic transport (GO:0046822)	202	114	70.44	1.62	0.00776
blood vessel development (GO:0001568)	446	250	155.52	1.61	8.45e-09
respiratory tube development (GO:0030323)	191	107	66.6	1.61	0.0223
muscle organ development (GO:0007517)	283	158	98.68	1.6	0.000145
regulation of small GTPase mediated signal transduction (GO:0051056)	285	158	99.38	1.59	0.000224
lung development (GO:0030324)	187	104	65.21	1.59	0.0409
mitotic nuclear division (GO:0007067)	335	185	116.82	1.58	2.05e-05
angiogenesis (GO:0001525)	296	163	103.22	1.58	0.000208
regulation of vasculature development (GO:1901342)	211	116	73.58	1.58	0.0206
regulation of protein serine/threonine kinase activity (GO:0071900)	430	235	149.94	1.57	3.95e-07
blood vessel morphogenesis (GO:0048514)	376	206	131.11	1.57	4.94e-06
muscle tissue development (GO:0060537)	285	156	99.38	1.57	0.000583
heart morphogenesis (GO:0003007)	212	116	73.93	1.57	0.0254
positive regulation of neuron projection development (GO:0010976)	203	111	70.79	1.57	0.0418
growth (GO:0040007)	407	221	141.92	1.56	2.51e-06
striated muscle tissue development (GO:0014706)	271	147	94.5	1.56	0.00224
negative regulation of cell adhesion (GO:0007162)	215	117	74.97	1.56	0.0295
respiratory system development (GO:0060541)	217	117	75.67	1.55	0.0442
cardiovascular system development (GO:0072358)	779	418	271.64	1.54	1.9e-13
circulatory system development (GO:0072359)	779	418	271.64	1.54	1.9e-13
microtubule cytoskeleton organization (GO:0000226)	343	184	119.61	1.54	0.000167
regulation of MAP kinase activity (GO:0043405)	282	151	98.34	1.54	0.0032
positive regulation of cell projection organization (GO:0031346)	271	146	94.5	1.54	0.00355
positive regulation of protein serine/threonine kinase activity (GO:0071902)	278	149	96.94	1.54	0.00361
negative regulation of phosphate metabolic process (GO:0045936)	503	268	175.4	1.53	2.19e-07
negative regulation of phosphorus metabolic process (GO:0010563)	503	268	175.4	1.53	2.19e-07
positive regulation of cell migration (GO:0030335)	347	185	121	1.53	0.000231
positive regulation of neurogenesis (GO:0050769)	354	188	123.44	1.52	0.000234
cellular response to external stimulus (GO:0071496)	317	168	110.54	1.52	0.00139
muscle structure development (GO:0061061)	462	244	161.1	1.51	3.6e-06
regulation of system process (GO:0044057)	426	225	148.55	1.51	1.68e-05
positive regulation of cellular component movement (GO:0051272)	365	192	127.28	1.51	0.000322
regulation of cell migration (GO:0030334)	599	314	208.88	1.5	2.69e-08
heart development (GO:0007507)	441	230	153.78	1.5	3.1e-05
positive regulation of cell motility (GO:2000147)	357	187	124.49	1.5	0.000633
positive regulation of neuron differentiation (GO:0045666)	280	146	97.64	1.5	0.0196
regulation of GTPase activity (GO:0043087)	542	281	189	1.49	1.08e-06
positive regulation of nervous system development (GO:0051962)	414	215	144.36	1.49	0.000135
negative regulation of intracellular signal transduction (GO:1902532)	400	208	139.48	1.49	0.000208
positive regulation of locomotion (GO:0040017)	374	194	130.42	1.49	0.000706
regulation of homeostatic process (GO:0032844)	355	185	123.79	1.49	0.00103
tube morphogenesis (GO:0035239)	356	185	124.14	1.49	0.00123
regulation of cytoskeleton organization (GO:0051493)	401	207	139.83	1.48	0.000376
regulation of neuron projection development (GO:0010975)	342	176	119.26	1.48	0.00437
mitotic cell cycle (GO:0000278)	791	405	275.83	1.47	4.89e-10
cell migration (GO:0016477)	759	390	264.67	1.47	9.06e-10
regulation of cell motility (GO:2000145)	634	325	221.08	1.47	1.36e-07
microtubule-based process (GO:0007017)	509	261	177.49	1.47	1.29e-05
positive regulation of GTPase activity (GO:0043547)	492	252	171.56	1.47	2.69e-05
regulation of cytoplasmic transport (GO:1903649)	432	222	150.64	1.47	0.000176
response to inorganic substance (GO:0010035)	427	219	148.9	1.47	0.000252
epithelial tube morphogenesis (GO:0060562)	316	162	110.19	1.47	0.0148
positive regulation of secretion by cell (GO:1903532)	301	154	104.96	1.47	0.0289
response to wounding (GO:0009611)	738	376	257.35	1.46	7.4e-09
cellular response to growth factor stimulus (GO:0071363)	733	372	255.6	1.46	1.58e-08
regulation of cellular component movement (GO:0051270)	709	361	247.23	1.46	2.29e-08
regulation of cell projection organization (GO:0031344)	459	234	160.06	1.46	0.000139
positive regulation of cell development (GO:0010720)	446	227	155.52	1.46	0.000255
response to drug (GO:0042493)	415	212	144.71	1.46	0.00055
response to oxidative stress (GO:0006979)	339	173	118.21	1.46	0.00883
regulation of metal ion transport (GO:0010959)	327	166	114.03	1.46	0.0192
regulation of protein kinase activity (GO:0045859)	825	417	287.68	1.45	1.22e-09
tube development (GO:0035295)	587	297	204.69	1.45	3.66e-06
cell division (GO:0051301)	466	235	162.5	1.45	0.000299
morphogenesis of an epithelium (GO:0002009)	439	222	153.08	1.45	0.000575
response to steroid hormone (GO:0048545)	405	205	141.23	1.45	0.00167
regulation of response to wounding (GO:1903034)	383	194	133.56	1.45	0.00332
forebrain development (GO:0030900)	355	180	123.79	1.45	0.00798
regulation of actin filament-based process (GO:0032970)	323	163	112.63	1.45	0.0322
regulation of kinase activity (GO:0043549)	872	438	304.07	1.44	7.12e-10
positive regulation of cell differentiation (GO:0045597)	799	402	278.62	1.44	6.21e-09
positive regulation of hydrolase activity (GO:0051345)	815	408	284.2	1.44	8.06e-09
response to lipid (GO:0033993)	772	388	269.2	1.44	1.8e-08
transmembrane receptor protein tyrosine kinase signaling pathway (GO:0007169)	783	392	273.04	1.44	2.26e-08
response to growth factor (GO:0070848)	754	379	262.93	1.44	3.21e-08
mitotic cell cycle process (GO:1903047)	720	361	251.07	1.44	1.41e-07
regulation of locomotion (GO:0040012)	700	352	244.1	1.44	1.81e-07
wound healing (GO:0042060)	658	331	229.45	1.44	6.91e-07
negative regulation of cell proliferation (GO:0008285)	633	317	220.73	1.44	2.73e-06
response to alcohol (GO:0097305)	316	159	110.19	1.44	0.0488
enzyme linked receptor protein signaling pathway (GO:0007167)	1004	502	350.1	1.43	2.08e-11
small GTPase mediated signal transduction (GO:0007264)	778	388	271.29	1.43	4.72e-08
regulation of neurogenesis (GO:0050767)	600	299	209.22	1.43	1.38e-05
neurotrophin signaling pathway (GO:0038179)	397	198	138.44	1.43	0.00684
neurotrophin TRK receptor signaling pathway (GO:0048011)	394	196	137.39	1.43	0.00908
extracellular matrix organization (GO:0030198)	365	182	127.28	1.43	0.0187
extracellular structure organization (GO:0043062)	366	182	127.63	1.43	0.0219
cellular response to lipid (GO:0071396)	364	181	126.93	1.43	0.0233
sulfur compound metabolic process (GO:0006790)	340	169	118.56	1.43	0.0494
intracellular signal transduction (GO:0035556)	1816	902	633.25	1.42	1.85e-22
positive regulation of developmental process (GO:0051094)	1104	547	384.97	1.42	5.27e-12
regulation of anatomical structure morphogenesis (GO:0022603)	857	424	298.84	1.42	1.39e-08
cytoskeleton organization (GO:0007010)	848	419	295.7	1.42	2.24e-08
tissue morphogenesis (GO:0048729)	576	286	200.86	1.42	4.3e-05
regulation of neuron differentiation (GO:0045664)	484	239	168.77	1.42	0.00113
organelle fission (GO:0048285)	472	233	164.59	1.42	0.00165
activation of protein kinase activity (GO:0032147)	457	226	159.36	1.42	0.0022
nuclear division (GO:0000280)	445	221	155.17	1.42	0.00221
cellular response to organic cyclic compound (GO:0071407)	358	177	124.84	1.42	0.0408
cell motility (GO:0048870)	834	411	290.82	1.41	5.1e-08
localization of cell (GO:0051674)	834	411	290.82	1.41	5.1e-08
positive regulation of protein kinase activity (GO:0045860)	584	287	203.65	1.41	0.000101
regulation of intracellular transport (GO:0032386)	564	278	196.67	1.41	0.000132
negative regulation of protein modification process (GO:0031400)	569	279	198.41	1.41	0.000195
signal transduction by protein phosphorylation (GO:0023014)	404	199	140.88	1.41	0.014
gland development (GO:0048732)	405	199	141.23	1.41	0.0162
in utero embryonic development (GO:0001701)	370	182	129.02	1.41	0.0405
regulation of intracellular protein transport (GO:0033157)	364	179	126.93	1.41	0.0489
cell cycle (GO:0007049)	1322	644	460.99	1.4	3.28e-13
regulation of protein phosphorylation (GO:0001932)	1330	647	463.78	1.4	3.62e-13
response to abiotic stimulus (GO:0009628)	1119	548	390.2	1.4	3.65e-11
regulation of transferase activity (GO:0051338)	967	472	337.2	1.4	5.21e-09
regulation of nervous system development (GO:0051960)	693	339	241.65	1.4	7.97e-06
head development (GO:0060322)	699	341	243.75	1.4	9.44e-06
regulation of growth (GO:0040008)	615	300	214.46	1.4	9.38e-05
response to extracellular stimulus (GO:0009991)	483	236	168.43	1.4	0.0029
DNA repair (GO:0006281)	434	212	151.34	1.4	0.0113
endomembrane system organization (GO:0010256)	432	211	150.64	1.4	0.012
reproductive structure development (GO:0048608)	420	205	146.46	1.4	0.0175
Ras protein signal transduction (GO:0007265)	394	193	137.39	1.4	0.0275
regulation of phosphorylation (GO:0042325)	1419	687	494.82	1.39	9.4e-14
protein phosphorylation (GO:0006468)	944	459	329.18	1.39	1.88e-08
response to organonitrogen compound (GO:0010243)	913	441	318.37	1.39	1.23e-07
response to organic cyclic compound (GO:0014070)	798	386	278.27	1.39	2.01e-06
brain development (GO:0007420)	661	321	230.5	1.39	4.48e-05
regulation of body fluid levels (GO:0050878)	657	319	229.1	1.39	5.08e-05
cellular response to nitrogen compound (GO:1901699)	658	318	229.45	1.39	8.33e-05
positive regulation of kinase activity (GO:0033674)	609	295	212.36	1.39	0.00023
negative regulation of cellular component organization (GO:0051129)	547	266	190.74	1.39	0.000796
epithelial cell differentiation (GO:0030855)	510	247	177.84	1.39	0.00302
regulation of cell morphogenesis (GO:0022604)	477	232	166.33	1.39	0.005
response to nutrient levels (GO:0031667)	453	220	157.96	1.39	0.0106
reproductive system development (GO:0061458)	424	205	147.85	1.39	0.0312
positive regulation of multicellular organismal process (GO:0051240)	1357	653	473.2	1.38	2.17e-12
cell cycle process (GO:0022402)	1068	515	372.42	1.38	2.86e-09
regulation of cell cycle (GO:0051726)	946	456	329.88	1.38	7.24e-08
cellular response to oxygen-containing compound (GO:1901701)	924	446	322.21	1.38	1.03e-07
central nervous system development (GO:0007417)	870	418	303.38	1.38	8.18e-07
regulation of cell development (GO:0060284)	763	366	266.06	1.38	1.44e-05
cellular response to organonitrogen compound (GO:0071417)	610	294	212.71	1.38	0.000375
response to peptide (GO:1901652)	590	283	205.74	1.38	0.000988
regulation of cellular protein localization (GO:1903827)	497	240	173.31	1.38	0.0054
hemostasis (GO:0007599)	519	249	180.98	1.38	0.00541
cellular response to stress (GO:0033554)	1718	823	599.08	1.37	4.71e-16
response to endogenous stimulus (GO:0009719)	1545	739	538.75	1.37	6.84e-14
response to oxygen-containing compound (GO:1901700)	1453	693	506.67	1.37	1.47e-12
cellular response to endogenous stimulus (GO:0071495)	1119	534	390.2	1.37	5.21e-09
anatomical structure formation involved in morphogenesis (GO:0048646)	974	464	339.64	1.37	2.31e-07
positive regulation of transport (GO:0051050)	866	415	301.98	1.37	1.31e-06
regulation of MAPK cascade (GO:0043408)	771	368	268.85	1.37	2.21e-05
positive regulation of transferase activity (GO:0051347)	665	318	231.89	1.37	0.000222
cell proliferation (GO:0008283)	661	316	230.5	1.37	0.000251
regulation of cellular component biogenesis (GO:0044087)	653	311	227.71	1.37	0.000451
blood coagulation (GO:0007596)	514	246	179.24	1.37	0.00749
coagulation (GO:0050817)	516	246	179.93	1.37	0.00985
regulation of mitotic cell cycle (GO:0007346)	466	223	162.5	1.37	0.0237
cellular response to peptide (GO:1901653)	466	222	162.5	1.37	0.0331
negative regulation of transport (GO:0051051)	452	216	157.62	1.37	0.0366
regulation of intracellular signal transduction (GO:1902531)	1571	746	547.82	1.36	2.29e-13
regulation of multicellular organismal development (GO:2000026)	1517	718	528.99	1.36	1.94e-12
regulation of cellular localization (GO:0060341)	1175	558	409.73	1.36	3.32e-09
response to nitrogen compound (GO:1901698)	994	472	346.62	1.36	2.4e-07
chemical homeostasis (GO:0048878)	864	411	301.28	1.36	3.84e-06
response to peptide hormone (GO:0043434)	557	264	194.23	1.36	0.00635
metal ion homeostasis (GO:0055065)	470	223	163.89	1.36	0.0408
regulation of multicellular organismal process (GO:0051239)	2381	1124	830.27	1.35	1.89e-21
regulation of phosphorus metabolic process (GO:0051174)	1666	785	580.95	1.35	1.73e-13
regulation of phosphate metabolic process (GO:0019220)	1653	778	576.41	1.35	3.15e-13
movement of cell or subcellular component (GO:0006928)	1503	709	524.11	1.35	6.03e-12
regulation of cell differentiation (GO:0045595)	1489	702	519.23	1.35	9.54e-12
regulation of cell proliferation (GO:0042127)	1475	696	514.34	1.35	1.08e-11
regulation of hydrolase activity (GO:0051336)	1233	579	429.96	1.35	7.29e-09
negative regulation of multicellular organismal process (GO:0051241)	941	443	328.13	1.35	2.9e-06
cell morphogenesis involved in differentiation (GO:0000904)	830	392	289.43	1.35	2.16e-05
negative regulation of transcription from RNA polymerase II promoter (GO:0000122)	722	341	251.77	1.35	0.000233
regulation of secretion (GO:0051046)	663	311	231.19	1.35	0.00169
regulation of secretion by cell (GO:1903530)	611	288	213.06	1.35	0.00319
positive regulation of programmed cell death (GO:0043068)	579	272	201.9	1.35	0.00852
positive regulation of apoptotic process (GO:0043065)	570	268	198.76	1.35	0.00957
ion homeostasis (GO:0050801)	559	263	194.93	1.35	0.0114
cation homeostasis (GO:0055080)	519	245	180.98	1.35	0.0204
monocarboxylic acid metabolic process (GO:0032787)	508	240	177.14	1.35	0.0244
regulation of localization (GO:0032879)	2267	1056	790.52	1.34	4.61e-18
regulation of protein modification process (GO:0031399)	1679	784	585.48	1.34	1.35e-12
neurogenesis (GO:0022008)	1628	760	567.7	1.34	4.42e-12
locomotion (GO:0040011)	1354	635	472.15	1.34	6.52e-10
cell morphogenesis (GO:0000902)	1111	519	387.41	1.34	2.52e-07
response to hormone (GO:0009725)	1019	476	355.33	1.34	1.73e-06
epithelium development (GO:0060429)	989	461	344.87	1.34	4.4e-06
regulation of protein localization (GO:0032880)	900	422	313.84	1.34	1.22e-05
cellular lipid metabolic process (GO:0044255)	880	410	306.86	1.34	4.28e-05
neuron projection morphogenesis (GO:0048812)	714	334	248.98	1.34	0.00078
cell morphogenesis involved in neuron differentiation (GO:0048667)	697	325	243.05	1.34	0.00153
axon development (GO:0061564)	675	316	235.38	1.34	0.0016
cellular homeostasis (GO:0019725)	655	306	228.4	1.34	0.00296
negative regulation of cell differentiation (GO:0045596)	660	308	230.15	1.34	0.00297
regulation of cell adhesion (GO:0030155)	612	285	213.41	1.34	0.00938
inorganic ion homeostasis (GO:0098771)	533	249	185.86	1.34	0.0347
anatomical structure morphogenesis (GO:0009653)	2341	1083	816.32	1.33	9.81e-18
positive regulation of molecular function (GO:0044093)	1738	809	606.05	1.33	8.35e-13
positive regulation of catalytic activity (GO:0043085)	1476	684	514.69	1.33	6.05e-10
cell projection organization (GO:0030030)	1172	542	408.69	1.33	3.91e-07
positive regulation of protein phosphorylation (GO:0001934)	958	443	334.06	1.33	2.49e-05
organ morphogenesis (GO:0009887)	888	412	309.65	1.33	6.22e-05
peptidyl-amino acid modification (GO:0018193)	864	400	301.28	1.33	0.00013
neuron projection development (GO:0031175)	838	388	292.22	1.33	0.000211
regulation of protein transport (GO:0051223)	724	337	252.46	1.33	0.00107
cellular response to hormone stimulus (GO:0032870)	690	319	240.61	1.33	0.0041
axonogenesis (GO:0007409)	651	301	227.01	1.33	0.00843
secretion (GO:0046903)	589	274	205.39	1.33	0.0161
regulation of signal transduction (GO:0009966)	2538	1165	885.02	1.32	2.34e-18
regulation of cellular component organization (GO:0051128)	2160	998	753.21	1.32	7.89e-16
phosphorus metabolic process (GO:0006793)	2067	948	720.78	1.32	5.38e-14
regulation of transport (GO:0051049)	1715	788	598.03	1.32	3.57e-11
generation of neurons (GO:0048699)	1551	714	540.85	1.32	5.73e-10
positive regulation of signaling (GO:0023056)	1533	703	534.57	1.32	1.87e-09
phosphorylation (GO:0016310)	1269	585	442.51	1.32	1.03e-07
cellular component morphogenesis (GO:0032989)	1191	547	415.31	1.32	8.56e-07
death (GO:0016265)	1115	512	388.81	1.32	3.59e-06
cell death (GO:0008219)	1110	509	387.07	1.32	4.86e-06
positive regulation of phosphorylation (GO:0042327)	994	458	346.62	1.32	2.06e-05
negative regulation of protein metabolic process (GO:0051248)	1004	461	350.1	1.32	2.77e-05
cell projection morphogenesis (GO:0048858)	915	421	319.07	1.32	0.000107
regulation of response to external stimulus (GO:0032101)	862	397	300.59	1.32	0.000253
regulation of establishment of protein localization (GO:0070201)	785	362	273.74	1.32	0.000906
chemotaxis (GO:0006935)	779	359	271.64	1.32	0.00109
taxis (GO:0042330)	779	359	271.64	1.32	0.00109
positive regulation of cell death (GO:0010942)	609	281	212.36	1.32	0.0221
positive regulation of MAPK cascade (GO:0043410)	589	272	205.39	1.32	0.0298
regulation of cell communication (GO:0010646)	3019	1378	1052.75	1.31	7.72e-22
regulation of signaling (GO:0023051)	2870	1311	1000.79	1.31	1.36e-20
regulation of molecular function (GO:0065009)	2711	1239	945.35	1.31	3.21e-19
response to organic substance (GO:0010033)	2636	1206	919.19	1.31	1.03e-18
nervous system development (GO:0007399)	2271	1039	791.91	1.31	1.91e-15
regulation of catalytic activity (GO:0050790)	2244	1022	782.5	1.31	1.39e-14
regulation of developmental process (GO:0050793)	2112	968	736.47	1.31	2.66e-14
tissue development (GO:0009888)	1601	732	558.28	1.31	9.96e-10
positive regulation of signal transduction (GO:0009967)	1398	637	487.49	1.31	8.08e-08
negative regulation of response to stimulus (GO:0048585)	1304	596	454.71	1.31	2.48e-07
positive regulation of cellular component organization (GO:0051130)	1143	523	398.57	1.31	3.73e-06
negative regulation of cellular protein metabolic process (GO:0032269)	938	430	327.09	1.31	0.000113
cell part morphogenesis (GO:0032990)	935	427	326.04	1.31	0.000192
negative regulation of developmental process (GO:0051093)	848	387	295.7	1.31	0.000936
cellular response to chemical stimulus (GO:0070887)	2404	1090	838.29	1.3	2.73e-15
phosphate-containing compound metabolic process (GO:0006796)	2020	917	704.39	1.3	2.5e-12
cellular response to organic substance (GO:0071310)	1978	900	689.74	1.3	2.9e-12
cell development (GO:0048468)	1776	803	619.3	1.3	5.45e-10
positive regulation of cell communication (GO:0010647)	1662	755	579.55	1.3	1.38e-09
homeostatic process (GO:0042592)	1316	597	458.9	1.3	7.45e-07
positive regulation of phosphate metabolic process (GO:0045937)	1114	506	388.46	1.3	1.87e-05
positive regulation of phosphorus metabolic process (GO:0010562)	1114	506	388.46	1.3	1.87e-05
programmed cell death (GO:0012501)	1068	485	372.42	1.3	4.18e-05
negative regulation of signal transduction (GO:0009968)	1039	470	362.31	1.3	0.000115
neuron development (GO:0048666)	982	444	342.43	1.3	0.000307
positive regulation of intracellular signal transduction (GO:1902533)	964	436	336.15	1.3	0.000394
carboxylic acid metabolic process (GO:0019752)	858	389	299.19	1.3	0.00165
DNA metabolic process (GO:0006259)	722	328	251.77	1.3	0.0124
regulation of cellular response to stress (GO:0080135)	729	330	254.21	1.3	0.0155
cellular response to DNA damage stimulus (GO:0006974)	691	314	240.96	1.3	0.0201
response to stress (GO:0006950)	3648	1636	1272.09	1.29	7.7e-24
regulation of biological quality (GO:0065008)	3134	1411	1092.85	1.29	3.2e-20
regulation of protein metabolic process (GO:0051246)	2530	1137	882.23	1.29	5.26e-15
regulation of cellular protein metabolic process (GO:0032268)	2364	1063	824.34	1.29	8.37e-14
positive regulation of protein metabolic process (GO:0051247)	1489	671	519.23	1.29	1.39e-07
positive regulation of cellular protein metabolic process (GO:0032270)	1396	630	486.8	1.29	4.9e-07
negative regulation of cellular macromolecule biosynthetic process (GO:2000113)	1240	559	432.4	1.29	7.39e-06
positive regulation of protein modification process (GO:0031401)	1144	515	398.92	1.29	4.19e-05
negative regulation of transcription, DNA-templated (GO:0045892)	1104	495	384.97	1.29	0.000137
apoptotic process (GO:0006915)	1046	472	364.75	1.29	0.000142
negative regulation of molecular function (GO:0044092)	1037	467	361.61	1.29	0.000214
oxoacid metabolic process (GO:0043436)	975	438	339.99	1.29	0.000757
protein complex assembly (GO:0006461)	948	426	330.57	1.29	0.0011
protein complex biogenesis (GO:0070271)	948	426	330.57	1.29	0.0011
negative regulation of cellular process (GO:0048523)	4025	1795	1403.55	1.28	8.12e-26
positive regulation of metabolic process (GO:0009893)	3529	1575	1230.59	1.28	8.95e-22
negative regulation of metabolic process (GO:0009892)	2481	1104	865.14	1.28	3.09e-13
cell surface receptor signaling pathway (GO:0007166)	2180	974	760.18	1.28	1.28e-11
negative regulation of cellular metabolic process (GO:0031324)	2213	985	771.69	1.28	2.15e-11
positive regulation of response to stimulus (GO:0048584)	2033	905	708.92	1.28	3.53e-10
single-organism organelle organization (GO:1902589)	1970	880	686.95	1.28	4.01e-10
positive regulation of gene expression (GO:0010628)	1664	743	580.25	1.28	5.36e-08
regulation of response to stress (GO:0080134)	1415	630	493.42	1.28	3.89e-06
positive regulation of nucleic acid-templated transcription (GO:1903508)	1403	625	489.24	1.28	4.23e-06
positive regulation of transcription, DNA-templated (GO:0045893)	1403	625	489.24	1.28	4.23e-06
negative regulation of macromolecule biosynthetic process (GO:0010558)	1318	588	459.6	1.28	1.16e-05
neuron differentiation (GO:0030182)	1168	522	407.29	1.28	8.22e-05
negative regulation of cell communication (GO:0010648)	1159	518	404.15	1.28	9.33e-05
lipid metabolic process (GO:0006629)	1134	506	395.43	1.28	0.000169
negative regulation of signaling (GO:0023057)	1147	511	399.97	1.28	0.000174
vesicle-mediated transport (GO:0016192)	1150	512	401.01	1.28	0.000182
negative regulation of nucleic acid-templated transcription (GO:1903507)	1138	506	396.83	1.28	0.000257
biological adhesion (GO:0022610)	1041	465	363	1.28	0.00057
cell adhesion (GO:0007155)	1037	462	361.61	1.28	0.000838
positive regulation of transcription from RNA polymerase II promoter (GO:0045944)	987	442	344.17	1.28	0.000924
organic acid metabolic process (GO:0006082)	993	444	346.27	1.28	0.00102
embryo development (GO:0009790)	967	433	337.2	1.28	0.00126
membrane organization (GO:0061024)	877	392	305.82	1.28	0.00575
positive regulation of cell proliferation (GO:0008284)	813	362	283.5	1.28	0.0211
positive regulation of biological process (GO:0048518)	5302	2341	1848.85	1.27	1.56e-34
positive regulation of cellular process (GO:0048522)	4586	2024	1599.17	1.27	6.1e-28
negative regulation of biological process (GO:0048519)	4372	1939	1524.55	1.27	2.01e-27
system development (GO:0048731)	4011	1773	1398.67	1.27	1.45e-23
regulation of response to stimulus (GO:0048583)	3555	1577	1239.66	1.27	1.02e-20
positive regulation of macromolecule metabolic process (GO:0010604)	2741	1213	955.81	1.27	2.81e-14
organ development (GO:0048513)	2784	1229	970.8	1.27	3.32e-14
negative regulation of macromolecule metabolic process (GO:0010605)	2207	981	769.6	1.27	3.43e-11
regulation of cell death (GO:0010941)	1508	668	525.85	1.27	2.48e-06
positive regulation of RNA biosynthetic process (GO:1902680)	1431	636	499	1.27	4.17e-06
positive regulation of RNA metabolic process (GO:0051254)	1467	650	511.55	1.27	4.23e-06
negative regulation of gene expression (GO:0010629)	1404	623	489.59	1.27	8.05e-06
negative regulation of biosynthetic process (GO:0009890)	1401	620	488.54	1.27	1.31e-05
negative regulation of cellular biosynthetic process (GO:0031327)	1381	612	481.57	1.27	1.38e-05
negative regulation of RNA biosynthetic process (GO:1902679)	1153	511	402.06	1.27	0.000324
cellular protein localization (GO:0034613)	1138	505	396.83	1.27	0.000336
cellular macromolecule localization (GO:0070727)	1146	507	399.62	1.27	0.000452
regulation of organelle organization (GO:0033043)	1097	485	382.53	1.27	0.000953
single-organism catabolic process (GO:0044712)	918	406	320.11	1.27	0.00997
cellular developmental process (GO:0048869)	3543	1558	1235.47	1.26	7.16e-19
cell differentiation (GO:0030154)	3372	1485	1175.84	1.26	6.37e-18
positive regulation of cellular metabolic process (GO:0031325)	2904	1275	1012.65	1.26	3.48e-14
protein modification process (GO:0036211)	2783	1222	970.45	1.26	2.09e-13
cellular protein modification process (GO:0006464)	2783	1222	970.45	1.26	2.09e-13
response to external stimulus (GO:0009605)	2080	917	725.31	1.26	1.95e-09
cellular localization (GO:0051641)	2174	953	758.09	1.26	2.15e-09
regulation of transcription from RNA polymerase II promoter (GO:0006357)	1716	754	598.38	1.26	6.42e-07
negative regulation of nitrogen compound metabolic process (GO:0051172)	1406	620	490.28	1.26	2.18e-05
regulation of programmed cell death (GO:0043067)	1424	626	496.56	1.26	2.83e-05
regulation of apoptotic process (GO:0042981)	1407	617	490.63	1.26	5.23e-05
negative regulation of nucleobase-containing compound metabolic process (GO:0045934)	1310	577	456.81	1.26	9.39e-05
negative regulation of RNA metabolic process (GO:0051253)	1193	525	416.01	1.26	0.000492
cellular component organization (GO:0016043)	5066	2217	1766.55	1.25	1.44e-29
anatomical structure development (GO:0048856)	4699	2041	1638.58	1.25	1.56e-24
multicellular organismal development (GO:0007275)	4571	1985	1593.94	1.25	1.56e-23
macromolecule localization (GO:0033036)	2013	879	701.95	1.25	4.7e-08
protein localization (GO:0008104)	1689	739	588.97	1.25	2.07e-06
positive regulation of nucleobase-containing compound metabolic process (GO:0045935)	1649	721	575.02	1.25	3.93e-06
positive regulation of macromolecule biosynthetic process (GO:0010557)	1600	697	557.93	1.25	1.4e-05
oxidation-reduction process (GO:0055114)	1034	451	360.56	1.25	0.0105
single-organism developmental process (GO:0044767)	5209	2250	1816.42	1.24	7.96e-27
developmental process (GO:0032502)	5291	2279	1845.01	1.24	1.29e-26
cellular component organization or biogenesis (GO:0071840)	5188	2240	1809.1	1.24	1.51e-26
localization (GO:0051179)	4683	2020	1633	1.24	1.23e-22
macromolecule modification (GO:0043412)	2929	1266	1021.36	1.24	4.99e-12
cellular component assembly (GO:0022607)	1810	783	631.16	1.24	4.06e-06
positive regulation of nitrogen compound metabolic process (GO:0051173)	1726	748	601.87	1.24	7.78e-06
positive regulation of biosynthetic process (GO:0009891)	1745	753	608.49	1.24	1.36e-05
positive regulation of cellular biosynthetic process (GO:0031328)	1712	738	596.99	1.24	2.38e-05
organelle organization (GO:0006996)	2912	1253	1015.44	1.23	2.64e-11
establishment of localization in cell (GO:0051649)	1812	778	631.86	1.23	1.62e-05
single-organism biosynthetic process (GO:0044711)	1333	570	464.83	1.23	0.00446
single-organism metabolic process (GO:0044710)	4494	1917	1567.09	1.22	8.87e-19
single-organism localization (GO:1902578)	3296	1399	1149.34	1.22	2.4e-11
establishment of localization (GO:0051234)	3851	1626	1342.87	1.21	3.01e-13
transport (GO:0006810)	3742	1562	1304.86	1.2	7.03e-11
single-organism transport (GO:0044765)	3104	1298	1082.39	1.2	1.83e-08
small molecule metabolic process (GO:0044281)	2233	937	778.66	1.2	2.19e-05
catabolic process (GO:0009056)	1764	739	615.12	1.2	0.00163
cellular catabolic process (GO:0044248)	1448	607	504.93	1.2	0.02
protein complex subunit organization (GO:0071822)	1406	588	490.28	1.2	0.0376
regulation of metabolic process (GO:0019222)	6588	2734	2297.29	1.19	8.25e-24
cellular response to stimulus (GO:0051716)	6227	2582	2171.4	1.19	1.72e-21
protein metabolic process (GO:0019538)	4241	1759	1478.87	1.19	5.86e-12
cellular protein metabolic process (GO:0044267)	3575	1485	1246.63	1.19	1.82e-09
cellular component biogenesis (GO:0044085)	1978	819	689.74	1.19	0.00195
organic substance catabolic process (GO:1901575)	1509	627	526.2	1.19	0.0378
regulation of immune system process (GO:0002682)	1473	613	513.65	1.19	0.0408
response to stimulus (GO:0050896)	7621	3132	2657.5	1.18	1.21e-26
organic substance transport (GO:0071702)	1899	780	662.2	1.18	0.0118
regulation of cellular metabolic process (GO:0031323)	5814	2380	2027.39	1.17	4.83e-16
regulation of primary metabolic process (GO:0080090)	5631	2306	1963.57	1.17	2.46e-15
regulation of macromolecule metabolic process (GO:0060255)	5607	2290	1955.2	1.17	1.27e-14
cell communication (GO:0007154)	5325	2167	1856.87	1.17	9.97e-13
immune system process (GO:0002376)	2163	886	754.25	1.17	0.00315
single-organism cellular process (GO:0044763)	11415	4633	3980.5	1.16	1.1e-50
metabolic process (GO:0008152)	9928	4005	3461.97	1.16	1.3e-33
cellular metabolic process (GO:0044237)	8573	3463	2989.47	1.16	1.41e-25
single organism signaling (GO:0044700)	5192	2105	1810.49	1.16	1.68e-11
signaling (GO:0023052)	5195	2106	1811.54	1.16	1.72e-11
signal transduction (GO:0007165)	4801	1949	1674.15	1.16	2.26e-10
single-organism process (GO:0044699)	12755	5124	4447.77	1.15	3.36e-58
organic substance metabolic process (GO:0071704)	9008	3615	3141.16	1.15	2.37e-25
primary metabolic process (GO:0044238)	8697	3485	3032.71	1.15	4.29e-23
macromolecule metabolic process (GO:0043170)	7438	2973	2593.69	1.15	1.52e-16
single-multicellular organism process (GO:0044707)	6193	2475	2159.55	1.15	5.5e-12
biosynthetic process (GO:0009058)	4673	1870	1629.51	1.15	1.19e-07
organic substance biosynthetic process (GO:1901576)	4587	1836	1599.52	1.15	1.89e-07
cellular biosynthetic process (GO:0044249)	4493	1801	1566.74	1.15	2.1e-07
regulation of gene expression (GO:0010468)	4074	1638	1420.63	1.15	1.13e-06
response to chemical (GO:0042221)	3968	1591	1383.67	1.15	4.87e-06
regulation of cellular macromolecule biosynthetic process (GO:2000112)	3768	1510	1313.93	1.15	1.83e-05
regulation of nucleobase-containing compound metabolic process (GO:0019219)	3861	1542	1346.36	1.15	2.69e-05
regulation of RNA metabolic process (GO:0051252)	3573	1429	1245.93	1.15	9.19e-05
regulation of nucleic acid-templated transcription (GO:1903506)	3460	1384	1206.53	1.15	0.000165
regulation of transcription, DNA-templated (GO:0006355)	3438	1375	1198.86	1.15	0.000192
regulation of RNA biosynthetic process (GO:2001141)	3480	1390	1213.5	1.15	0.000208
biological regulation (GO:0065007)	11133	4420	3882.16	1.14	1.95e-33
cellular macromolecule metabolic process (GO:0044260)	6753	2693	2354.82	1.14	2.2e-13
multicellular organismal process (GO:0032501)	6444	2551	2247.07	1.14	1.01e-10
regulation of biosynthetic process (GO:0009889)	4098	1636	1429	1.14	7.93e-06
regulation of nitrogen compound metabolic process (GO:0051171)	4148	1649	1446.44	1.14	2e-05
regulation of cellular biosynthetic process (GO:0031326)	4054	1613	1413.66	1.14	2.61e-05
regulation of macromolecule biosynthetic process (GO:0010556)	3875	1546	1351.24	1.14	3.28e-05
cellular process (GO:0009987)	14147	5570	4933.17	1.13	2.21e-57
regulation of biological process (GO:0050789)	10614	4190	3701.18	1.13	5.53e-27
regulation of cellular process (GO:0050794)	10120	4004	3528.92	1.13	2.85e-25
macromolecule biosynthetic process (GO:0009059)	3651	1438	1273.13	1.13	0.00229
cellular macromolecule biosynthetic process (GO:0034645)	3576	1406	1246.98	1.13	0.00461
biological_process (GO:0008150)	16542	6356	5768.32	1.1	1.3e-69
nitrogen compound metabolic process (GO:0006807)	5475	2109	1909.17	1.1	0.000561
organic cyclic compound metabolic process (GO:1901360)	4818	1853	1680.07	1.1	0.00805
heterocycle metabolic process (GO:0046483)	4573	1752	1594.64	1.1	0.0422
nucleobase-containing compound metabolic process (GO:0006139)	4372	1679	1524.55	1.1	0.0448
cellular nitrogen compound metabolic process (GO:0034641)	5112	1947	1782.59	1.09	0.037
neurological system process (GO:0050877)	1277	340	445.3	0.76	0.000386
G-protein coupled receptor signaling pathway (GO:0007186)	1197	289	417.4	0.69	4.11e-08
sensory perception (GO:0007600)	945	181	329.53	0.55	4.05e-16
detection of stimulus (GO:0051606)	726	121	253.16	0.48	3.84e-17
detection of chemical stimulus involved in sensory perception of smell (GO:0050911)	423	1	147.5	< 0.2	2.25e-59
detection of chemical stimulus involved in sensory perception (GO:0050907)	462	7	161.1	< 0.2	9.32e-56
sensory perception of smell (GO:0007608)	450	13	156.92	< 0.2	7.93e-47
detection of chemical stimulus (GO:0009593)	496	21	172.96	< 0.2	2.61e-45
sensory perception of chemical stimulus (GO:0007606)	536	30	186.91	< 0.2	5.85e-43
detection of stimulus involved in sensory perception (GO:0050906)	514	29	179.24	< 0.2	6.92e-41
