# Supplementary material for: Deconstruction of a Metastatic Tumor Microenvironment Reveals a Common Matrix Response in Human Cancers
Source: Oxford University Press journal article supplement (doi:10.1158/2159-8290.cd-17-0284), 2017-12-01
Supplement: 21598290cd170284-sup-180566_3_supp_4416931_p04mfv.xlsx [file 21598290cd170284-sup-180566_3_supp_4416931_p04mfv.xlsx]

## Sheet: Table S15
Supplementary Table 15. Tangent modulus and % relaxation calculated from sample indentation
G#	Tangent modulus (kPa)	Relaxation (%)
8	0.4	50
58	0.6	60
102	0.65	60
69	0.75	43
81	0.88	53
30	0.94	63.8
88	0.975	56
57	1.13	54
94	1.16	49.6
76	1.23	62.6
93	1.28	64
10	1.28	51
72	1.33	49
54	1.43	57
43	1.46	51
144	1.5	51.6
92	1.53	57
42	1.65	56.35
33	1.76	52
67	1.77	69
11	2.03	50
15	2.6	69
45	2.89	57
29	3.75	67
77	3.78	64.2
136	3.81	63
85	4.33	61
75	10.97	72
124	15.9	68
17	19.13	77
82	33.13	77.23
138	61.9	70.1

## Sheet: Table S16
Supplementary Table 16: Loading weight matrix of the first latent variable from PLS regression on matrisome proteins vs tissue modulus. Univariate correlation coefficients and pvalues are included.
Filtered applied to display top 64 proteins (loading weight >|0.08|)
PLS model weights		univariate correlations
protein	loading.weight	pearson.pvalue	pearson.rvalue	spearman.pvalue	spearman.rvalue
COMP	0.150863	9.12e-08	0.811706	0.00620633	0.496045
PLOD1	0.149504	6.08e-07	0.780021	0.000106273	0.657537
THBS1	0.14921	4.12e-07	0.786982	0.0367712	0.389457
FBLN1	0.144304	6e-07	0.780244	1.66e-05	0.709201
LMAN1	0.139495	6.3e-06	0.732347	0.000802474	0.587648
SPON1	0.139039	2.13e-06	0.755806	1.58e-05	0.710417
SERPINH1	0.137424	1.01e-05	0.721201	1.24e-05	0.716344
SFRP4	0.136568	1.14e-05	0.718442	1.05e-05	0.720443
FN1	0.134256	2.76e-05	0.695991	0.0357472	0.391428
VCAN	0.133655	2.74e-05	0.696201	4.06e-05	0.685552
S100A11	0.133141	1.84e-05	0.706578	0.00134162	0.566958
S100A1	0.131539	2.11e-05	0.70299	0.000818298	0.586887
HCFC1	0.127813	3.93e-05	0.686462	0.000426537	0.611327
ANXA4	0.124603	5.95e-05	0.674754	0.000193585	0.638502
COL11A1	0.124297	0.000125222	0.652457	0.000104379	0.658089
PCOLCE	0.124179	4.59e-05	0.682134	0.000195938	0.638105
SFRP2	0.123977	8.24e-05	0.665233	0.000996396	0.5791
MXRA5	0.123903	0.000396322	0.613963	0.00396907	0.518354
ANXA6	0.121472	0.000129277	0.651459	0.000365668	0.616825
AEBP1	0.121171	0.000275477	0.626678	0.000411276	0.612637
ANXA5	0.115435	0.000225046	0.633514	0.00846994	0.479616
EFEMP2	0.114939	0.000366338	0.61676	0.0157281	0.444388
HPX	0.111029	0.00115862	0.573002	0.00405242	0.517349
CSTB	0.109831	0.00169817	0.556998	0.0504621	0.366592
LGALS3	0.107597	0.00212797	0.547165	0.0336547	0.3956
FBLN2	0.106734	0.00148107	0.562817	0.00153161	0.561399
COL8A1	0.106399	0.00199821	0.549938	0.000229669	0.632834
THBS4	0.103204	0.00315611	0.529242	0.169562	0.262117
PLOD3	0.100859	0.00352568	0.524026	0.0186725	0.433956
CILP	0.100186	0.00292035	0.53285	0.0116461	0.461936
LTBP2	0.098776	0.0054107	0.503049	0.0220727	0.42348
SERPINA1	0.098685	0.0033021	0.527122	0.0119002	0.460705
LGALS1	0.0970594	0.00637204	0.494683	0.00787174	0.483557
ANXA1	0.0932907	0.00454993	0.511693	0.00186185	0.553024
CTSB	0.0883178	0.0102393	0.469193	0.00411841	0.516566
PLG	0.0869364	0.00893934	0.476684	0.00140365	0.565072
GPC6	0.0869129	0.0109453	0.465453	0.0225565	0.422099
AGT	0.0864873	0.0167681	0.440531	0.0237962	0.418669
S100A6	0.0858971	0.00725644	0.487884	0.0723122	0.338678
THBS2	0.0787806	0.0279784	0.40808	0.200478	0.244858
CTSD	0.0793666	0.0284094	0.407064	0.000437391	0.61042
COL12A1	0.0791144	0.0594072	0.354201	0.76355	0.0583816
ANXA7	0.0803138	0.0325822	0.39782	0.0479543	0.370375
SPARC	0.0742689	0.0813971	0.328994	0.164653	0.265057
COL5A1	0.068385	0.044585	0.375713	0.00226796	0.544334
MMP2	0.0664606	0.0763615	0.334252	0.0460136	0.373412
S100A4	0.0627804	0.0772845	0.333269	0.162573	0.266322
SERPINB1	0.0621075	0.119882	0.295312	0.456731	0.143807
SERPINA3	0.0607204	0.132188	0.286274	0.116622	0.29782
F2	0.0591512	0.0820736	0.328306	0.0463429	0.37289
HRG	0.0572886	0.153089	0.272238	0.0910456	0.319575
CLEC3B	0.0572003	0.122914	0.293024	0.171359	0.261056
POSTN	0.0570774	0.0883243	0.322152	0.465963	0.140904
FGB	0.0557452	0.119271	0.295778	0.198615	0.245843
ANXA11	0.0542356	0.173666	0.259706	0.000219712	0.634315
TGFBI	0.0537415	0.209222	0.240315	0.634557	0.0921296
TNC	0.0521896	0.259649	0.216345	0.319915	0.191403
EFEMP1	0.0513037	0.3338	0.186084	0.0103158	0.468777
CTSZ	0.048672	0.223645	0.233096	0.0300124	0.40339
MFAP4	0.0462309	0.198565	0.24587	0.0443522	0.376094
SERPINF1	0.0446852	0.14368	0.278372	0.0459929	0.373445
ANXA2	0.0443223	0.159362	0.268296	0.292145	0.202488
ITIH1	0.0424817	0.190535	0.250193	0.215322	0.237221
LTBP3	0.0390625	0.311294	0.194777	0.0328033	0.397358
FBLN5	0.0377931	0.207309	0.241297	0.083937	0.326435
SPP1	0.0375178	0.235874	0.227217	0.00743779	0.486578
CXCL12	0.0374383	0.294887	0.201365	0.00888529	0.477015
TGM4	0.0359541	0.355085	0.178184	0.214285	0.237743
ITIH2	0.0359387	0.337645	0.184635	0.168759	0.262594
MFAP2	0.0348119	0.317644	0.192286	0.117895	0.296835
FGA	0.0326098	0.37149	0.172286	0.496386	0.131543
VTN	0.0297962	0.516303	0.125571	0.213366	0.238207
F13A1	0.0290751	0.309247	0.195587	0.705106	0.0734081
S100A10	0.0289019	0.397032	0.163398	0.939342	0.0147801
TGM2	0.0270527	0.464838	0.141256	0.772291	0.0561646
C1QC	0.0251483	0.498588	0.130877	0.643638	0.0896773
LTBP1	0.0248215	0.454463	0.144525	0.0623717	0.350419
S100A13	0.0222716	0.4329	0.151448	0.603003	0.100764
COL5A2	0.0222267	0.44563	0.147339	0.691908	0.0768568
FGG	0.0208738	0.535602	0.119892	0.752906	0.0610913
SERPING1	0.0200095	0.499012	0.130749	0.742655	-0.0637117
ANXA2P2	0.0190583	0.525152	0.122955	0.841127	-0.038921
FMOD	0.0162681	0.590534	0.104227	0.864023	-0.0332553
BGN	0.0132949	0.668681	0.0829827	0.432752	-0.151496
SRPX	0.0122356	0.604373	0.100385	0.131139	0.287019
C1QB	0.00847425	0.786676	0.0525307	0.915143	0.0206948
PRSS1	0.00387954	0.89816	0.0248561	0.970658	-0.00714462
COL3A1	0.00353034	0.815937	0.0451907	0.12777	0.289445
COL4A5	0.00277233	0.958053	0.0102162	0.574327	0.108778
COL4A1	0.00204021	0.828661	0.0420185	0.233159	0.228505
COL5A3	0.00142778	0.974653	-0.00617163	0.575519	-0.108441
WISP2	-0.0028006	0.823422	0.0433234	0.391087	0.165437
A2M	-0.00530103	0.884083	-0.0283136	0.73271	-0.0662643
MUC16	-0.00597955	0.922843	0.0188111	0.670378	-0.0825326
ITIH4	-0.00803852	0.939311	-0.0147878	0.869941	-0.0317954
MFAP5	-0.0125868	0.689912	-0.0773801	0.495055	-0.131946
PODN	-0.0140254	0.995371	-0.00112698	0.626417	-0.0943397
ELN	-0.0194557	0.835836	-0.0402346	0.952445	-0.0115835
LTBP4	-0.0216652	0.72509	-0.0682275	0.974952	-0.00609864
AMBP	-0.0229293	0.712524	-0.0714794	0.524428	0.123168
COL14A1	-0.0283786	0.63888	-0.0909603	0.871014	0.031531
COL2A1	-0.0321948	0.544497	-0.117307	0.0914991	0.319152
ADAMTS16	-0.0333964	0.265947	-0.213575	0.630986	-0.0930977
NPNT	-0.0367026	0.323677	-0.189948	0.44342	-0.148048
EMILIN1	-0.0398073	0.280696	-0.207251	0.630016	-0.0933613
MMRN1	-0.0429229	0.197954	-0.246194	0.0631183	-0.349488
FBN3	-0.0432626	0.205602	-0.242179	0.0662592	-0.345666
MUC2	-0.0440363	0.196341	-0.247055	0.00784124	-0.483765
COL18A1	-0.0445634	0.256675	-0.217668	0.0112113	-0.464097
COL1A2	-0.0457458	0.285119	-0.205397	0.224781	-0.232541
AGRN	-0.0467593	0.197684	-0.246338	0.0172809	-0.438703
PZP	-0.0528397	0.149889	-0.274293	0.091488	-0.319162
LUM	-0.053424	0.161476	-0.266993	0.000477684	-0.607218
COL6A1	-0.0548698	0.230069	-0.229982	0.0817722	-0.328612
PRELP	-0.0590928	0.110808	-0.302426	0.00207197	-0.548343
S100A9	-0.061836	0.0653146	-0.3468	0.00573878	-0.500062
ELANE	-0.0626389	0.0678167	-0.343822	0.0243771	-0.417112
DCN	-0.0651347	0.107312	-0.305283	0.0297455	-0.403991
DPT	-0.0697804	0.0786229	-0.331859	0.224722	-0.23257
MMP9	-0.0739164	0.0410786	-0.381621	0.0107947	-0.466234
COL6A2	-0.0820318	0.0251152	-0.415176	0.000631025	-0.596872
LAMB2	-0.0762884	0.0299229	-0.403591	0.000402882	-0.613376
LAMB1	-0.082214	0.0220951	-0.423416	0.00161365	-0.559182
COL1A1	-0.0822325	0.0409434	-0.381856	0.48025	-0.13647
NID2	-0.0860486	0.010918	-0.465594	1.4e-05	-0.713388
ASPN	-0.0879941	0.0169498	-0.439878	0.000127861	-0.651804
CTSG	-0.0893865	0.0133875	-0.453907	0.00144472	-0.563863
NID1	-0.0921893	0.0115871	-0.462226	0.00201478	-0.549575
COL15A1	-0.0924184	0.0097139	-0.472118	0.000369998	-0.616408
LAMA5	-0.0934122	0.0107844	-0.466287	0.00439786	-0.513364
HSPG2	-0.0954268	0.00500934	-0.506922	0.000383878	-0.6151
LAMA4	-0.0969387	0.00530351	-0.504059	3.85e-05	-0.68703
COL6A6	-0.0970971	0.0044928	-0.512315	4.61e-06	-0.739345
EMILIN2	-0.0991767	0.00376672	-0.520872	0.00827902	-0.480847
S100A8	-0.100858	0.00521576	-0.504899	0.00112481	-0.574209
VWF	-0.102257	0.00345969	-0.524922	0.0163855	-0.441926
COL6A3	-0.102996	0.00695289	-0.490135	0.000101485	-0.658948
FBN2	-0.103135	0.00181801	-0.554058	0.00047128	-0.60771
FBN1	-0.103833	0.00249722	-0.540007	0.000176836	-0.641458
MMRN2	-0.107166	0.000711659	-0.592291	0.000784289	-0.58854
OGN	-0.109872	0.00152507	-0.56158	9.12e-06	-0.723734
COL4A2	-0.11126	0.00106991	-0.576237	2.72e-05	-0.696391
TNXB	-0.114568	0.000609992	-0.59815	2.79e-07	-0.793694
ABI3BP	-0.12259	0.000227498	-0.633152	0.000746212	-0.590467
LAMC1	-0.124194	0.000138849	-0.64921	6.04e-07	-0.780145

## Sheet:  Table S17
Supplementary Table 17: Loading weight matrix of the first latent variable from PLS regression on matrisome genes vs tissue modulus. Univariate correlation coefficients and pvalues are included.
Filtered applied to display top 405 genes (loading weight >|0.030|)
PLS model weights		univariate correlations
genes	loading.weights	pearson.pvalues	pearson.rvalues	spearman.pvalues	spearman.rvalues
MMP11	0.0662704	6.63933e-10	0.865585	2.55232e-06	0.74313
A2ML1	0.0180643	0.26315	0.21095	0.0321774	0.391962
CLEC18B	0.0657579	4.15024e-09	0.845344	0.000410546	0.603854
ACAN	-0.0160294	0.455834	-0.141474	0.848189	0.036489
ADAM10	-0.0125218	0.426611	-0.150719	0.83631	-0.0393815
ADAM11	0.0113776	0.398772	0.159857	0.893235	0.0255868
COL10A1	0.0640518	5.80371e-09	0.841296	1.866e-07	0.791857
ADAM15	-0.0185216	0.139169	-0.276461	0.0129654	-0.448326
ADAM17	-0.00196116	0.947653	-0.0125182	0.986035	-0.00333741
ADAM19	0.00326246	0.868885	0.0314681	0.621652	0.0938925
ADAM22	-0.0250393	0.122797	-0.287968	0.327415	-0.185115
COL11A1	0.0616108	9.98425e-08	0.801898	2.56919e-08	0.821893
COMP	0.0616021	1.37011e-07	0.796886	1.9517e-05	0.695962
ADAM32	0.00745133	0.701689	0.0729396	0.732158	-0.0651908
HAPLN1	0.0612623	4.18929e-07	0.778014	7.31595e-05	0.659711
INHBA	0.0607289	2.00895e-07	0.790634	2.31864e-05	0.691512
MMP13	0.0607117	2.48477e-07	0.787069	4.45359e-05	0.673919
SDC1	0.0606722	4.85419e-07	0.775382	5.28158e-06	0.727333
ST14	0.0605819	4.52825e-07	0.776629	9.09779e-09	0.835688
ADAMTS10	-0.00832573	0.667608	-0.0817455	0.944182	0.0133496
ADAMTS12	0.00566752	0.737206	0.063917	0.673082	-0.0803204
ADAMTS13	-0.00561603	0.626123	-0.0926953	0.726878	-0.0665258
SERPINB5	0.0596383	6.90998e-07	0.768928	1.50572e-06	0.75393
COL22A1	0.0590322	9.06836e-07	0.763816	2.88783e-05	0.685727
ADAMTS16	-0.0129135	0.555642	-0.112016	0.712861	-0.0700857
ADAMTS17	0.00434243	0.618634	0.0947025	0.415919	0.154188
ADAMTS18	-0.0259718	0.0888632	-0.316046	0.0185479	-0.427189
ADAMTS19	-0.00637649	0.780807	-0.0530216	0.936683	-0.0151465
ADAMTS2	0.00239776	0.830335	0.0408395	0.514861	0.123707
PODNL1	0.058943	8.18284e-07	0.765763	1.433e-05	0.703749
ADAMTS4	-0.0266989	0.0944966	-0.310882	0.0479935	-0.364
MFAP2	0.0588485	1.41446e-06	0.755174	5.82802e-06	0.725108
ADAMTS6	-0.0223915	0.241794	-0.220431	0.718107	0.0687507
ADAMTS7	-0.000148624	0.954019	-0.0109943	0.541081	-0.116142
ADAMTS8	-0.0159422	0.504178	-0.126843	0.782878	-0.0525086
CST1	0.0586507	4.84383e-06	0.729271	3.65148e-08	0.816938
CLEC18A	0.05762	4.09717e-06	0.732975	0.0127157	0.449438
EPYC	0.0575701	1.76275e-06	0.75076	9.09359e-05	0.653243
MMP7	0.0575224	3.13648e-06	0.738765	1.60725e-07	0.794304
LOXL4	0.0574492	7.66667e-06	0.718798	0.0012902	0.560018
ADAMTSL5	-0.0266816	0.0767971	-0.328011	0.00427851	-0.506619
CLEC5A	0.05737	4.63118e-06	0.73027	1.71169e-05	0.699299
LOXL1	0.0571839	1.80583e-06	0.750271	0.00018138	0.631661
WNT7A	0.0568763	3.46321e-06	0.736635	0.000214724	0.626128
MDK	0.0564347	1.64199e-05	0.700347	5.25048e-08	0.811659
AMH	-0.0249703	0.0514552	-0.358895	0.123484	-0.287462
CLEC18C	0.0558051	3.66034e-06	0.735436	0.000834757	0.577421
PRSS1	0.0545441	3.09489e-05	0.683875	3.07495e-05	0.684048
WNT6	0.0544945	2.03564e-05	0.694881	0.00670906	0.484147
LAMB3	0.0544239	1.98708e-05	0.695501	0.00200723	0.541328
EMID1	0.0543702	5.3094e-05	0.668973	0.00283291	0.525976
FN1	0.0543415	1.7778e-05	0.69834	0.00196655	0.542218
RSPO4	0.054292	2.8706e-05	0.685886	0.000431537	0.602069
ANGPTL6	0.0178088	0.203683	0.238848	0.0442975	0.369785
CTSV	0.0540019	5.21329e-05	0.669491	6.99403e-05	0.66103
WNT10A	0.053947	2.06992e-05	0.694452	0.000214915	0.626099
ANXA11	0.0182015	0.305176	0.19366	0.596151	0.10079
S100A14	0.0536875	5.0483e-05	0.670401	0.00348362	0.516409
ANXA2	0.00203763	0.923804	0.0182355	0.415919	-0.154188
CTHRC1	0.0536078	1.66811e-05	0.69995	4.41324e-06	0.731338
ANXA4	-0.0112902	0.569784	-0.108056	0.749841	-0.0607409
S100A2	0.0532539	3.32213e-05	0.681966	0.00775505	0.476582
MUC5B	0.052511	3.66291e-05	0.679312	0.00286743	0.525423
ANXA7	-0.0290863	0.0508994	-0.359696	0.0222839	-0.415842
BGN	0.0520349	3.91196e-05	0.677509	0.000185142	0.630993
COL8A2	0.0519314	3.16302e-05	0.68329	3.9458e-05	0.677272
ANXA9	0.0146338	0.432038	0.148977	0.983243	0.00400489
AREG	-0.0272661	0.101312	-0.304936	0.0933242	-0.311937
SPOCK3	0.0516789	6.62746e-05	0.6626	0.00150371	0.553664
ASPN	-0.00787435	0.981156	-0.00450362	0.572712	0.107242
BCAN	0.016926	0.293335	0.198369	0.661989	0.0832128
BDNF	-0.00656851	0.638704	-0.0893454	0.165108	-0.260096
COL9A2	0.0514059	7.10127e-05	0.660585	1.33347e-05	0.705529
BMP1	0.00778597	0.681755	0.0780711	0.706757	-0.0716431
FBN3	0.051369	7.68181e-05	0.658273	0.000127158	0.642968
MMP1	0.0512207	0.000253847	0.620534	0.0493013	0.362038
BMP4	-0.0205692	0.15876	-0.26392	0.0662275	-0.339749
PRSS3	0.0509514	0.000156249	0.636464	1.83645e-05	0.697515
SPOCK2	0.0505593	0.000157923	0.636123	0.000434219	0.601847
BMP7	0.02696	0.0698823	0.335536	0.159558	0.263433
BMP8A	0.00350486	0.653474	0.0854455	0.104098	0.302592
BMP8B	-0.00179816	0.940893	-0.0141374	0.839048	-0.038714
IGFBP2	0.0504587	0.000317383	0.6129	0.000431537	0.602069
MUC1	0.0504427	0.000329203	0.611631	0.00588808	0.490822
BTC	-0.0247165	0.0683316	-0.337302	0.0787765	-0.325954
C17orf58	-0.0236729	0.104678	-0.30211	0.0474095	-0.36489
C1QA	-0.013671	0.356057	-0.174619	0.332767	-0.183113
C1QB	-0.00406663	0.770999	-0.0554571	0.730397	-0.0656358
C1QC	-0.00337059	0.800858	-0.0480679	0.749841	-0.0607409
C1QL1	-0.00123617	0.96161	0.0091776	0.30258	-0.194682
LAMC2	0.0489495	0.000242054	0.622135	0.00452052	0.503949
SEMA7A	0.0485923	0.000475268	0.598585	0.00805397	0.47458
C1QTNF2	-0.0206921	0.233392	-0.224313	0.505003	-0.126599
TLL2	0.048331	0.000202157	0.628117	7.95254e-05	0.657248
SERPINA5	0.0483134	0.000217448	0.62571	0.00102999	0.56914
WNT7B	0.048083	0.000708316	0.583743	0.0280148	0.401157
MATN3	0.048043	0.00027064	0.618365	0.00588808	0.490822
C1QTNF7	-0.00832886	0.728638	-0.0660805	0.383306	0.165091
C1QTNF6	0.0479818	0.00031091	0.613613	0.000293115	0.615641
COL13A1	0.0477318	0.000236786	0.622873	0.000155799	0.636556
CILP2	0.0476367	0.000247456	0.621394	3.49259e-05	0.68061
TNFSF4	0.0474887	0.00047835	0.59835	0.0114354	0.455446
THBS2	0.0474009	0.00026837	0.618651	0.00335366	0.518189
CBLN4	-0.016902	0.417256	-0.153752	0.442945	0.145511
GDNF	0.0471828	0.000328588	0.611696	0.00694372	0.482367
F12	0.0469657	0.00067477	0.585586	0.0291755	0.398487
FNDC1	0.0469223	0.000494068	0.597173	0.0063697	0.486817
VCAN	0.0467905	0.00029087	0.615905	0.000302758	0.614529
CCL17	0.024736	0.0705896	0.33474	0.00479578	0.501057
SFRP5	0.0467741	0.00028503	0.616599	0.017314	0.431353
CCL19	0.00128799	0.760571	0.0580561	0.186632	0.247858
AEBP1	0.0467381	0.000341291	0.610375	0.00768992	0.477027
CCL20	-0.00331635	0.674532	-0.0799435	0.975797	-0.00578485
VWDE	0.0465085	0.000713843	0.583447	0.00803614	0.474698
CCL22	0.0194746	0.160241	0.263018	0.0508461	0.359773
ADAM28	0.046347	0.000643052	0.587405	2.18371e-05	0.693069
CCL24	-0.0255182	0.0952613	-0.310199	0.252033	-0.215819
CCL26	-0.0210801	0.116662	-0.292571	0.103831	-0.302815
CCL28	0.0103593	0.635979	0.0900686	0.847274	0.0367115
CCL3	-0.0081014	0.461569	-0.139698	0.444356	-0.145066
CCL3L3	0.00807059	0.731079	0.0654634	0.778173	0.0536749
CCL4	-0.0181884	0.245128	-0.218915	0.970214	-0.00711981
CCL4L1	-0.0185258	0.203306	-0.239041	0.0488802	-0.362665
CCL4L2	-0.00683488	0.608995	-0.0973005	0.984174	0.0037824
CCL5	0.00405964	0.6816	0.0781111	0.229688	0.226054
CCL7	0.00397384	0.947544	0.0125444	0.845428	0.0371607
CCL8	-0.0168593	0.202982	-0.239208	0.0176183	-0.430304
CD109	-0.0255013	0.143879	-0.273334	0.686827	0.0767605
HAPLN4	0.0462843	0.000514453	0.595694	0.007294	0.479803
LTA	0.0453035	0.00150963	0.553499	0.000494046	0.597174
MMP3	0.0449685	0.000512338	0.595845	1.59667e-05	0.70105
CHADL	-0.0200656	0.147965	-0.270682	0.00492765	-0.499722
PLOD1	0.0448653	0.00249239	0.531766	0.0718878	0.333296
SPP1	0.0448091	0.00145273	0.555106	9.05896e-06	0.714874
CHRDL2	-0.00539293	0.864692	-0.0324835	0.640855	-0.0887752
CILP	2.54e-05	0.722835	0.0675503	0.159558	0.263433
C1QL4	0.0443792	0.00241607	0.533157	0.473811	0.135944
CLC	-0.0132784	0.373246	-0.168561	0.428929	-0.149974
CLCF1	0.0112232	0.454125	0.142006	0.997207	0.000667482
GPC2	0.0442171	0.00105391	0.568222	0.00588808	0.490822
COL23A1	0.0441199	0.000969654	0.571541	0.00258061	0.530204
CLEC12A	-0.00217147	0.889863	-0.0263999	0.831751	-0.0404939
COL7A1	0.0440305	0.000917027	0.573744	0.00206961	0.539993
CLEC17A	0.00838995	0.522649	0.121441	0.176812	0.253311
CTSB	0.0428869	0.00321837	0.520106	0.0030616	0.522416
ADAMTS14	0.0425998	0.00169055	0.548718	0.000171676	0.633441
WISP3	0.0425942	0.00300452	0.523283	0.00670997	0.48414
ELFN2	0.0425109	0.00211272	0.539091	0.000141241	0.639671
CLEC2B	-0.0180409	0.233636	-0.224199	0.425513	-0.151074
CLEC2D	-0.0115222	0.618248	-0.0948061	0.414558	0.154633
CLEC2L	-0.0177177	0.34235	-0.179576	0.871108	-0.0309301
PLXNB2	0.0425037	0.00464755	0.502596	0.0235759	0.412282
CLEC4A	0.0186258	0.23252	0.224721	0.257074	0.213594
CLEC4D	-0.0183273	0.319319	-0.188183	0.505758	-0.126377
CLEC4E	-0.0191048	0.296725	-0.197009	0.381359	-0.165758
CLEC4F	-0.0161614	0.272667	-0.206888	0.289797	-0.1998
S100A1	0.0423035	0.00574948	0.492026	0.0302736	0.39604
WISP1	0.0422901	0.00100797	0.570001	0.000302758	0.614529
MUC20	0.04218	0.00450964	0.504067	0.00553525	0.493937
CLEC7A	0.0132532	0.380889	0.16592	0.114341	0.29436
CLEC9A	0.0134849	0.333865	0.182704	0.478939	0.134386
CNTF	-0.0285121	0.0626429	-0.34406	0.0757946	-0.329069
VWA1	0.0420879	0.00573281	0.492173	0.443651	0.145289
MMP14	0.042041	0.00308746	0.522028	0.00558452	0.493492
ISM1	0.0416201	0.00214356	0.538455	0.041481	0.374458
COL11A2	0.0101708	0.413264	0.155057	0.651812	0.0858827
COL12A1	0.00754645	0.554481	0.112343	0.413879	0.154856
TGFA	0.0415688	0.00157096	0.551825	0.00221055	0.537101
COL14A1	-0.0250421	0.19413	-0.243829	0.376194	0.167538
P4HA1	0.0412554	0.0037478	0.51296	0.00709389	0.481255
NRG3	0.0407875	0.00333771	0.518411	0.0718878	0.333296
COL17A1	-0.0150601	0.440044	-0.146429	0.237304	-0.222494
COL18A1	0.0265331	0.0993703	0.306598	0.155215	0.266103
VWA2	0.0404101	0.00399228	0.509949	0.00040047	0.604739
LEPRE1	0.0402468	0.00611549	0.488898	0.00538964	0.495272
ADAMTSL2	0.0398402	0.00450396	0.504128	0.0960604	0.309489
COL5A2	0.0395399	0.00332593	0.518576	0.00775505	0.476582
S100A16	0.0393499	0.0101369	0.462144	0.210929	0.235176
COL24A1	0.0181199	0.15072	0.268923	0.0268919	0.403827
COL16A1	0.0389341	0.00360422	0.514807	0.000651039	0.58694
VWA9	0.0386763	0.0115768	0.454755	0.394449	0.161308
ADAM8	0.0384612	0.00763397	0.477412	0.0172318	0.431639
FGF18	0.0380977	0.00916321	0.467659	0.0803009	0.324396
MUC15	0.0379985	0.00857307	0.471247	0.0109418	0.457913
NTF3	0.0379941	0.00772567	0.476783	0.027262	0.402937
COL4A2	-0.0223281	0.16158	-0.262208	0.0247562	-0.409167
COL4A3	-0.0140637	0.473165	-0.136141	0.621652	0.0938925
SERPINH1	0.0379155	0.0182234	0.428261	0.409816	0.156191
COL4A5	-0.00134586	0.868274	0.031616	0.684242	0.077428
SEMA5B	0.0377271	0.0090864	0.468115	0.00470963	0.501947
FAM20A	0.0375566	0.00784255	0.47599	0.11929	0.290577
MFGE8	0.0374052	0.00464243	0.50265	0.100668	0.305484
LTBP2	0.0373656	0.00505678	0.498443	0.0176834	0.430081
COL6A1	-0.00926749	0.645195	-0.0876273	0.750728	0.0605184
COL6A2	-0.00179676	0.97563	0.00582485	0.563932	0.10969
COL6A3	0.0168109	0.180005	0.251515	0.0232473	0.413172
IL23A	0.0371475	0.0177609	0.429817	0.0455503	0.367783
P4HA3	0.0370701	0.00865127	0.47076	0.00197665	0.541996
SFRP4	0.036904	0.00367244	0.513922	0.00393632	0.510624
COL8A1	0.0166489	0.192528	0.24468	0.530982	0.119034
COL2A1	0.0367919	0.00460335	0.503064	0.0467259	0.365943
COL9A1	0.0296431	0.0659387	0.340089	0.920985	-0.018912
MMP9	0.0367607	0.0105866	0.459747	0.0014063	0.556458
COL9A3	0.00382518	0.808729	0.0461317	0.708499	-0.0711981
COL5A1	0.036628	0.0096057	0.465095	0.000957685	0.572032
COLEC12	-0.0244375	0.162973	-0.26137	0.184193	-0.249193
COLQ	0.00208851	0.845961	0.0370309	0.459318	-0.140394
ADAMDEC1	0.0366132	0.00847688	0.471852	0.000165848	0.634553
CPAMD8	-0.00129458	0.769225	-0.0558986	0.351607	-0.176215
CPN2	-0.0173822	0.247543	-0.217826	0.137	-0.277926
CRELD1	-0.0256477	0.0546688	-0.354393	0.00139131	-0.556903
CRELD2	0.0130795	0.551755	0.113112	0.584784	-0.103905
CHAD	0.0365275	0.00131299	0.559298	0.0488533	0.362706
FBN2	0.0362796	0.00584784	0.491169	0.000206401	0.627434
CRISPLD1	0.0128935	0.295012	0.197695	0.12018	0.28991
CRISPLD2	-0.00179431	0.871098	0.0309325	0.948827	0.0122372
CRLF1	-0.000948277	0.978115	0.00523072	0.846359	-0.036934
CLEC11A	0.0358318	0.00861381	0.470993	0.00989794	0.463455
COL6A5	0.0354143	0.00801658	0.474827	0.00025516	0.62036
MEGF10	0.0353401	0.0177196	0.429958	0.0280148	0.401157
COL1A1	0.0352312	0.010808	0.458598	0.000617267	0.588942
CSPG5	0.0144988	0.455881	0.14146	0.598599	0.100122
CXCL11	0.0350523	0.0109858	0.457689	0.00280539	0.526421
ESM1	0.0347191	0.0246713	0.409387	0.293098	0.198465
CST3	-0.0227336	0.131465	-0.281744	0.109545	-0.298142
CST6	0.0116932	0.42454	0.151388	0.839048	0.038714
CST7	-0.00333293	0.999961	9.29314e-06	0.775701	0.0542886
CSTA	-0.0235865	0.11238	-0.295891	0.338172	-0.18111
CSTB	0.0243819	0.17193	0.256101	0.0948092	0.310602
CTF1	-0.0177121	0.181792	-0.25052	0.0123728	-0.450996
ANXA13	0.0347069	0.0112294	0.456464	0.100668	0.305484
GAS6	0.0297604	0.0140688	0.443616	0.283265	0.20247
CTSA	0.0249449	0.130038	0.282748	0.129978	0.28279
CST2	0.0346942	0.00764705	0.477322	0.0714858	0.333741
OGFOD2	0.0346745	0.0185418	0.427209	0.246564	0.218267
CTSD	0.0273074	0.0864784	0.318308	0.0177487	0.429859
CTSE	0.0126446	0.513146	0.124208	0.46706	0.138008
CTSF	-0.0216491	0.158661	-0.26398	0.118995	-0.2908
EGLN3	0.034459	0.0324583	0.391377	0.534855	0.117922
CCL11	0.0343222	0.0270432	0.403462	0.203034	0.239181
SFRP2	0.0336252	0.0076687	0.477173	0.00200723	0.541328
THSD4	0.033596	0.0231213	0.413515	0.167366	0.258761
ZP3	0.0335417	0.0421321	0.373356	0.319779	0.188008
CTSS	-0.0116377	0.585854	-0.10361	0.973005	0.00645233
LTB	0.033172	0.0271308	0.403251	0.0180781	0.428746
CTSW	-0.000305671	0.882273	0.0282313	0.440131	0.146401
CTSZ	0.00389996	0.752235	0.0601407	0.473811	0.135944
GDF1	0.0327568	0.041333	0.37471	0.0846439	0.32008
CXCL10	0.0326509	0.0391899	0.37845	0.00218834	0.537546
SERPINA1	0.0324911	0.0386693	0.379383	0.226875	0.227389
C1QTNF3	0.0275776	0.0291163	0.398621	0.0731043	0.331961
THBS3	0.0324312	0.0427987	0.372241	0.0270764	0.403382
CXCL13	0.022531	0.121518	0.288913	0.0434776	0.37112
CXCL14	-0.00860151	0.580179	-0.105174	0.443651	-0.145289
KERA	0.0322076	0.0111429	0.456896	0.00062398	0.588536
PLXNC1	0.02969	0.0316462	0.39308	0.00375657	0.512849
CXCL5	0.00972681	0.558212	0.111293	0.610079	0.0970075
MMP10	0.032054	0.0333421	0.389563	0.0753965	0.329492
CXCL9	0.00835946	0.485458	0.132419	0.151661	0.268328
CYR61	-0.0189141	0.284703	-0.201879	0.184598	-0.248971
GDF11	0.0318698	0.0318466	0.392656	0.021126	0.419179
DDX26B	0.0100984	0.41607	0.154139	0.497485	0.128824
CTSK	0.0316664	0.013904	0.444299	0.00697354	0.482145
AGRN	0.031632	0.0399195	0.377159	0.04416	0.370008
EBI3	0.0129081	0.32027	0.18782	0.366621	0.170876
ECM1	0.0219894	0.150377	0.269141	0.0980882	0.307709
CTSH	0.0312839	0.028642	0.399703	0.0131682	0.447436
EDA	-0.0174302	0.251896	-0.215881	0.183385	-0.249638
EDIL3	-0.0205844	0.274766	-0.206004	0.852766	-0.0353766
MMP2	0.0278579	0.0343375	0.387566	0.0176183	0.430304
EFEMP2	0.0125916	0.39649	0.160622	0.495988	-0.129269
EGFL6	-0.00922971	0.576332	-0.106238	0.937681	-0.0149071
C1QTNF5	0.0297141	0.0348663	0.386524	0.452873	0.142396
CTGF	0.0250827	0.0374969	0.381522	0.11122	0.296807
POSTN	0.0310838	0.0298709	0.396929	0.0246703	0.409389
S100A13	0.0310437	0.0545614	0.35454	0.382007	0.165536
EGLN2	-0.0112504	0.372236	-0.168912	0.0519303	-0.358216
SEMA4B	0.0306552	0.0554953	0.353269	0.149906	0.26944
HAPLN3	0.0305839	0.0447538	0.369051	0.280036	0.203805
IMPG2	0.0305454	0.0296288	0.397468	0.000134425	0.641228
COL3A1	0.0276842	0.0423724	0.372952	0.00298848	0.523529
ELN	0.00374436	0.557388	0.111525	0.183789	0.249416
COL1A2	0.0305155	0.0250674	0.408366	0.00241938	0.533096
VWA7	0.0274856	0.0428131	0.372217	0.0244142	0.410057
EMILIN1	0.0273554	0.0570361	0.351208	0.0197309	0.423406
VWA3A	0.030238	0.0202683	0.42175	0.0918187	0.313307
EMILIN3	-0.0148516	0.48517	-0.132506	0.852766	-0.0353766
NRTN	0.0287737	0.0490119	0.362469	0.00284676	0.525754
ARTN	0.0289796	0.0498055	0.361293	0.0783451	0.326399
ADAM12	0.0301863	0.0334926	0.389258	0.032356	0.39159
MUC16	0.030019	0.0580276	0.349905	0.20477	0.238291
SERPINB2	-0.0293325	0.0495012	-0.361742	0.00275103	-0.527311
HBEGF	-0.0296338	0.0494502	-0.361818	0.0027242	-0.527756
COL28A1	-0.0299188	0.0484078	-0.363374	0.0868587	-0.317944
CTSC	-0.0300105	0.0328009	-0.390669	0.010729	-0.459005
NID2	-0.0300465	0.0592315	-0.348347	0.134443	-0.279675
SEMA6C	-0.0302486	0.0296193	-0.397489	0.0253643	-0.407609
FAM20C	0.00967046	0.663337	0.0828604	0.740099	-0.0631883
FASLG	-0.00641352	0.683574	-0.0776005	0.878483	0.0291467
FBLN1	-0.0118604	0.646205	-0.0873605	0.547341	0.114362
HMSD	-0.0264175	0.0425868	-0.372594	0.000500106	-0.596729
SERPINB8	-0.030368	0.0497289	-0.361406	0.00543781	-0.494827
PLXNB3	-0.0304218	0.0358497	-0.384619	0.00085511	-0.576482
MMP25	-0.0304764	0.051475	-0.358866	0.0289794	-0.398932
IGF1	-0.0304992	0.0611158	-0.345956	0.129349	-0.283235
LGALS4	-0.0306136	0.0353578	-0.385567	0.122577	-0.28813
DCN	-0.0306778	0.0665198	-0.339405	0.326824	-0.185338
MGP	-0.0307527	0.0566783	-0.351683	0.730397	0.0656358
LAMB4	-0.0307625	0.0503053	-0.36056	0.0866259	-0.318167
MMP24	-0.0290822	0.0345901	-0.387067	0.00370404	-0.513517
SERPINB6	-0.0309442	0.0301472	-0.396318	0.00295966	-0.523974
FGF11	0.0175315	0.20835	0.236473	0.0696983	0.335744
FGF12	-0.0118821	0.371639	-0.16912	0.799992	0.0482812
PLXNA2	-0.0310133	0.0497284	-0.361406	0.015815	-0.436756
CBLN3	-0.0314539	0.0196448	-0.423675	0.00264505	-0.529091
FGF16	-0.0257603	0.16698	-0.258988	0.215352	-0.232977
F13A1	-0.0315395	0.0362042	-0.383943	0.025806	-0.406497
WNT9B	-0.0316706	0.0514437	-0.358911	0.0444353	-0.369563
FCN3	-0.0318661	0.0280593	-0.401053	0.000595617	-0.590277
FGF9	-0.0168846	0.232191	-0.224875	0.0337707	-0.388697
FGFBP1	0.00709359	0.721635	0.0678547	0.767649	-0.056291
ADAMTS3	-0.0319151	0.0432554	-0.371486	0.00479583	-0.501057
FGFBP3	-0.00777524	0.686398	-0.076871	0.687689	-0.076538
IL1A	-0.032021	0.0223746	-0.415586	0.00581133	-0.491486
MMP17	-0.0321041	0.02444	-0.409989	0.00101856	-0.569585
FLT3LG	0.00324322	0.807079	0.0465371	0.396435	-0.160641
FMOD	-0.0204457	0.155313	-0.266042	0.00607156	-0.489265
TNFSF12	-0.0321063	0.0264961	-0.40479	0.101452	-0.304817
SEMA3D	-0.0321611	0.0450129	-0.368636	0.0605671	-0.346646
FCN1	-0.0322658	0.0316909	-0.392985	0.0158745	-0.436534
HMCN1	-0.0323679	0.0415962	-0.374262	0.479674	-0.134164
FREM2	-0.00805827	0.534615	-0.117991	0.271538	-0.207365
FRZB	-0.00949699	0.739533	-0.0633308	0.12018	0.28991
FST	-0.0198912	0.194434	-0.243667	0.142358	-0.274335
CHRD	-0.0324189	0.0322329	-0.391846	0.140016	-0.275893
FSTL3	-0.0134277	0.452826	-0.142411	0.121374	-0.28902
ANGPTL4	-0.0324429	0.0267826	-0.404092	0.00460375	-0.503059
WNT9A	-0.0325222	0.0456522	-0.367622	0.0404466	-0.376238
C1QTNF4	-0.0325669	0.0367549	-0.382903	0.259109	-0.212704
S100A10	-0.0328024	0.0214429	-0.418251	0.00075351	-0.581377
GDF15	0.0120785	0.60617	0.0980653	0.505758	0.126377
C1QTNF9B	-0.0329905	0.0378808	-0.380815	0.0180022	-0.429001
GDF6	-0.00383572	0.841757	0.0380542	0.764077	0.057181
SERPINB9	-0.0330001	0.0418225	-0.373878	0.0675609	-0.338191
GDF9	0.0159086	0.362681	0.172264	0.411845	0.155523
LAMB2	-0.0331982	0.021332	-0.418574	0.0223629	-0.415619
FGF7	-0.0332343	0.0350371	-0.38619	0.0785606	-0.326176
GPC1	0.019487	0.193395	0.244219	0.77033	0.0556235
ANXA8L1	-0.0332664	0.020173	-0.422041	6.51324e-05	-0.663105
MST1	-0.0333801	0.015278	-0.438796	0.00439809	-0.505284
GPC4	-0.00786825	0.590523	-0.102329	0.712861	-0.0700857
GPC6	-0.0276403	0.0941802	-0.311165	0.046401	-0.366448
GREM1	-0.00318819	0.878802	-0.0290697	0.639176	-0.0892202
IL13	-0.0334023	0.0239417	-0.411303	0.0137998	-0.444735
CRLF3	-0.0334962	0.0252113	-0.407998	0.398426	-0.159973
EGFL8	-0.0337715	0.0167308	-0.433407	0.037708	-0.381132
PTN	-0.0337729	0.0241839	-0.410662	0.0953082	-0.310157
COL5A3	-0.0337734	0.0288488	-0.39923	0.0251022	-0.408277
HCFC1	-0.00935146	0.322044	-0.187145	0.264759	-0.210257
HHIP	-0.0338174	0.0143844	-0.442325	0.000831022	-0.577595
LGI2	-0.0338833	0.0204901	-0.421076	0.00303217	-0.522861
FRAS1	-0.0339522	0.0257424	-0.406656	0.00202784	-0.540883
WNT10B	-0.0339942	0.0289498	-0.398999	0.0303751	-0.395817
CTSL	-0.0341212	0.0221653	-0.416177	0.00218834	-0.537546
CSF3	-0.0341295	0.0300211	-0.396596	0.00724681	-0.480142
HPSE	-0.00820696	0.51141	-0.124716	0.562342	-0.110135
CXCL1	-0.0341769	0.0183165	-0.427952	0.000447852	-0.600734
HPX	-0.0157874	0.232008	-0.224961	0.331573	-0.183558
ELFN1	-0.0344736	0.0223301	-0.415711	0.00318178	-0.520636
HTRA1	0.00479686	0.614189	0.0958984	0.94604	0.0129047
HTRA3	-0.00905084	0.664939	-0.082442	0.377482	-0.167093
HTRA4	0.00172128	0.809002	0.0460648	0.0873255	0.317499
EGFL7	-0.0347208	0.0138681	-0.444449	0.0250153	-0.408499
HYAL2	-0.0261097	0.10791	-0.29946	0.128409	-0.283903
HYAL3	0.016568	0.498097	0.128642	0.622482	-0.09367
IFNG	-0.0270125	0.0562505	-0.352253	0.014663	-0.441206
ADAMTSL1	-0.0348815	0.0242655	-0.410447	0.202169	-0.239626
IGF2	-0.0271725	0.059099	-0.348517	0.158828	-0.263878
MMP19	-0.0349106	0.0302127	-0.396174	0.0197309	-0.423406
GDF7	-0.0349966	0.0327288	-0.390818	0.530982	-0.119034
FGF1	-0.035055	0.0114155	-0.455543	0.000320825	-0.612526
IGFBP4	-0.019502	0.237168	-0.222557	0.674794	-0.0798754
COL4A1	-0.0350713	0.0253951	-0.407531	0.0125188	-0.450328
TNN	-0.035193	0.0288498	-0.399227	0.0238249	-0.411614
IGFBP7	-0.0250542	0.144043	-0.273227	0.774805	-0.0545111
AGT	-0.0352228	0.0105783	-0.45979	0.000390562	-0.605629
IL10	-0.0239167	0.121248	-0.289114	0.102241	-0.30415
IL11	0.0256146	0.0822758	0.322412	0.374268	0.168206
IL12A	0.0160404	0.356746	0.174373	0.263726	0.210702
COL4A6	-0.035437	0.027841	-0.401564	0.214954	-0.233174
IL15	-0.024228	0.0734722	-0.331561	0.0960604	-0.309489
IL16	-0.0190164	0.284498	-0.201963	0.981381	-0.00444988
IL17D	-0.0229237	0.187845	-0.247199	0.114915	-0.293915
IL18	-0.0134242	0.466371	-0.138219	0.749841	-0.0607409
CCL18	-0.0355584	0.0245333	-0.409746	0.291444	-0.199132
IL1B	-0.011215	0.377578	-0.16706	0.156293	-0.265436
IL1RN	0.00850746	0.754787	0.0595019	0.948827	-0.0122372
MFAP4	-0.0355693	0.0189964	-0.425732	0.338776	-0.180888
ANGPT4	-0.036252	0.0188833	-0.426097	0.221319	-0.230059
IL24	-0.0208732	0.163503	-0.261052	0.109103	-0.298498
IL34	0.0159701	0.241421	0.220601	0.364093	0.171765
XCL2	-0.0364171	0.0177873	-0.429727	0.148513	-0.27033
ITIH4	-0.0364635	0.0110817	-0.457204	0.619993	-0.0943375
ANXA3	-0.0365169	0.0078185	-0.476152	3.32477e-05	-0.681945
INHA	0.00672144	0.797155	0.0489802	0.341805	-0.179775
C1QTNF1	-0.0368281	0.0134542	-0.4462	0.0024436	-0.532651
INHBB	-0.0276834	0.0821375	-0.32255	0.0654748	-0.340639
CCL2	-0.0368577	0.011063	-0.457298	0.000869855	-0.575815
ISM2	-0.0283479	0.0877581	-0.317089	0.0600097	-0.347352
ITIH3	-0.00406786	0.931497	-0.0163897	0.872962	0.0304817
NELL2	-0.0370629	0.0117189	-0.454068	0.0190971	-0.425409
CX3CL1	-0.0371314	0.00932556	-0.466707	0.00202784	-0.540883
ADAM23	-0.0371964	0.0175559	-0.430517	0.231576	-0.225164
ADAM9	-0.0373482	0.0101778	-0.461923	0.103299	-0.30326
KAL1	-0.0175055	0.294966	-0.197713	0.148513	-0.27033
KAZALD1	0.00865217	0.550103	0.11358	0.228279	0.226722
FGF13	-0.0374061	0.0085412	-0.471447	5.68237e-05	-0.667037
COL4A4	-0.0377192	0.0151398	-0.43933	0.492256	-0.130382
KY	0.024317	0.0815755	0.323112	0.00740896	0.478984
LAMA1	0.0202123	0.124441	0.286763	0.511818	0.124597
SEMA3C	-0.0377285	0.0181395	-0.428541	0.0320365	-0.392257
LAMA3	-0.0267731	0.111425	-0.296645	0.985104	-0.00355991
WIF1	-0.0377852	0.00796189	-0.47519	0.00114849	-0.564763
LAMA5	0.020138	0.222653	0.229414	0.299772	0.195795
FBN1	-0.0379598	0.014216	-0.443011	0.0468311	-0.36578
PAPPA2	-0.0379604	0.0107402	-0.458948	0.0268	-0.404049
VEGFA	-0.0379913	0.0125951	-0.449982	0.00303217	-0.522861
CTSO	-0.038235	0.0216942	-0.417523	0.954403	-0.0109022
CXCL12	-0.0382675	0.0111551	-0.456835	0.027262	-0.402937
PCSK6	-0.0385158	0.00977069	-0.464164	0.00177371	-0.546668
LAMC3	0.00274492	0.998302	0.000405841	0.861018	-0.0333741
LEFTY2	-0.0223474	0.163755	-0.260902	0.745408	-0.0618534
SDC2	-0.0387226	0.0111366	-0.456928	0.00258061	-0.530204
EREG	-0.0389704	0.0122492	-0.451566	0.0228418	-0.414284
LEPREL1	-0.0211181	0.26308	-0.210981	0.34485	-0.178663
LGALS1	-0.00926277	0.491308	-0.130665	0.0566179	-0.351763
PLXNA4	-0.039075	0.00582788	-0.491342	0.000344195	-0.610079
COL27A1	-0.0390829	0.00848519	-0.471799	0.0226013	-0.414952
ANXA6	-0.0391224	0.00497644	-0.499235	0.000491041	-0.597397
SRGN	-0.0393486	0.00893112	-0.469047	0.0257172	-0.406719
SEMA6A	-0.0393865	0.00666937	-0.484454	0.0119904	-0.452776
LGALS9	0.0286925	0.0714259	0.333808	0.00309127	0.521971
LGI1	-0.0188156	0.210291	-0.235496	0.262641	-0.21117
LEP	-0.0396613	0.00861896	-0.470961	0.000554309	-0.592947
LGI3	0.00162589	0.560513	0.110647	0.792774	0.0500612
ANXA5	-0.0396702	0.0071567	-0.480795	0.00290274	-0.524864
LIF	-0.00953305	0.518267	-0.122714	0.120478	-0.289687
LMAN1	-0.0197958	0.150879	-0.268822	0.0856998	-0.319057
LOX	-0.0181122	0.338925	-0.180833	0.382007	-0.165536
FSTL1	-0.0399855	0.00842986	-0.472149	0.00433795	-0.505952
LOXL2	0.00223675	0.91644	0.0200037	0.570311	-0.10791
LOXL3	-0.010834	0.52374	-0.121125	0.335163	-0.182223
CXCL3	-0.0400102	0.00640496	-0.486534	0.0020591	-0.540216
LRG1	-0.00717611	0.526331	-0.120375	0.113769	-0.294805
MEGF9	-0.0400647	0.00638125	-0.486724	0.00617857	-0.488375
TLL1	-0.0401706	0.00765115	-0.477294	0.0840973	-0.320614
LTBP1	-0.0168304	0.435895	-0.147746	0.647589	0.0869952
IGFBP3	-0.040175	0.00518785	-0.497174	0.00179223	-0.546223
LTBP3	0.0140117	0.302095	0.194874	0.373627	0.168428
SFRP1	-0.0402907	0.00737409	-0.479231	0.00146769	-0.554678
LUM	0.0212276	0.084064	0.320647	0.0960604	0.309489
IL6	-0.0403555	0.00571345	-0.492343	0.000348602	-0.609634
PLOD2	-0.0407266	0.00367446	-0.513896	8.80715e-06	-0.715541
CLEC10A	-0.0407445	0.00460593	-0.503036	0.0490293	-0.362443
MATN4	-0.0249888	0.109951	-0.297818	0.0220482	-0.416509
ADAMTS15	-0.0408519	0.00569329	-0.492521	0.0209754	-0.419624
SMOC1	-0.0409111	0.00432879	-0.506054	0.00475256	-0.501502
MEGF6	0.00283225	0.720905	0.06804	0.257582	0.213372
HMCN2	-0.0409596	0.00548525	-0.494392	0.0868587	-0.317944
COLEC11	-0.0410578	0.00443871	-0.504838	0.0021445	-0.538436
MFAP1	0.0194109	0.336965	0.181556	0.829017	-0.0411614
HAPLN2	-0.0410594	0.00924679	-0.467167	0.11578	-0.293247
CFC1	-0.0410949	0.00275228	-0.527291	1.94297e-06	-0.74878
GDF5	-0.0412006	0.00289387	-0.525004	5.09289e-05	-0.670152
MFAP5	-0.0119048	0.585018	-0.10384	0.191993	-0.244966
CBLN2	-0.0412963	0.00259801	-0.529901	0.000470463	-0.598953
BRINP2	-0.0413248	0.0045631	-0.503492	0.000147325	-0.638336
CSF1	-0.0413745	0.00324614	-0.519707	0.00038569	-0.606074
EMILIN2	-0.0414836	0.0063526	-0.486955	0.029571	-0.397597
NTN3	-0.0415007	0.00711271	-0.481117	0.275766	-0.205585
PODN	-0.041593	0.00520491	-0.497011	0.0297704	-0.397152
COL21A1	-0.0416255	0.00445666	-0.504642	0.215856	-0.232729
MMP15	0.0156182	0.501083	0.127757	0.672226	-0.0805429
MMP16	-0.0259925	0.143415	-0.273639	0.950685	-0.0117922
PLXND1	-0.0417044	0.00234056	-0.534571	0.044712	-0.369118
DHH	-0.0417602	0.00395733	-0.51037	0.0477008	-0.364445
CXCL6	-0.0418256	0.00284328	-0.525809	9.38815e-07	-0.763155
MMP23B	0.0116969	0.333325	0.182905	0.107068	0.300145
CLEC1A	-0.0419087	0.00318409	-0.520603	0.00583653	-0.491267
S100B	-0.0419544	0.00359535	-0.514924	1.20678e-05	-0.707976
F10	-0.041984	0.00318008	-0.520661	0.00555984	-0.493715
TSPEAR	-0.0420401	0.00200805	-0.541311	0.000757887	-0.581155
SEMA6B	-0.0420522	0.00361552	-0.51466	0.00361788	-0.514629
MMP8	0.00972351	0.502808	0.127247	0.665897	0.0821918
THBS4	-0.042095	0.00494312	-0.499567	0.0516187	-0.358661
FBLN7	-0.0421732	0.00561007	-0.493263	0.533304	-0.118367
ADAMTS9	-0.0422486	0.00416051	-0.507968	0.0178798	-0.429414
LGALS2	-0.0422516	0.00249338	-0.531748	0.000690457	-0.584715
EPGN	-0.0423455	0.00263586	-0.529248	4.40372e-05	-0.674232
CLEC4M	-0.0425734	0.0023379	-0.534622	0.000283175	-0.616822
MUC12	-0.00356034	0.89389	-0.025429	0.876588	-0.0296049
FGL2	-0.0426623	0.00396352	-0.510295	0.0230033	-0.413839
PAMR1	-0.0430708	0.00330201	-0.518913	0.00795327	-0.475248
MUC2	0.0169208	0.178021	0.252629	0.601483	0.0993375
BMP6	-0.0431575	0.00405508	-0.509201	0.0361611	-0.384025
SNED1	-0.0432825	0.0026691	-0.528682	0.000431537	-0.602069
MUC4	0.0177333	0.174089	0.25486	0.247832	0.217696
FCN2	-0.0436286	0.00249846	-0.531657	0.00118071	-0.56364
MXRA5	0.0261173	0.0508543	0.359761	0.0127157	0.449438
NDNF	-0.0243636	0.0957833	-0.309735	0.0090843	-0.468128
NELL1	-0.0276342	0.0754698	-0.329414	0.026254	-0.405384
LGALS3	-0.0436635	0.00180748	-0.54586	0.00534184	-0.495717
EYS	-0.043717	0.00265542	-0.528914	0.000393019	-0.605407
NGLY1	-0.0232743	0.069721	-0.335718	0.0398106	-0.37735
MMP28	-0.0437309	0.00118906	-0.563354	4.41559e-05	-0.674157
TCHH	-0.043788	0.00123285	-0.56188	0.000163567	-0.634998
NOV	-0.0191007	0.26512	-0.210102	0.511818	-0.124597
NPNT	-0.0120107	0.545962	-0.114753	0.983243	0.00400489
NRG1	0.0257143	0.0876765	0.317166	0.0111217	0.457003
BMP3	-0.0440804	0.00213657	-0.538599	0.0014834	-0.554233
BMP5	-0.044209	0.0020384	-0.540657	0.00151439	-0.553367
NRG4	-0.00364671	0.612388	-0.0963841	0.396435	-0.160641
MEGF8	-0.0442143	0.00106719	-0.56772	0.00492765	-0.499722
CBLN1	-0.0444957	0.00201713	-0.541114	0.00377422	-0.512627
NTN1	-0.0128662	0.306774	-0.193033	0.43105	-0.149294
LGALS12	-0.0446055	0.00154417	-0.552549	5.99939e-05	-0.66548
ELANE	-0.0447086	0.00128788	-0.560092	0.00152245	-0.553144
NTN5	0.0263136	0.129268	0.283292	0.165108	0.260096
NTNG1	-0.0291209	0.0538911	-0.355463	0.00645314	-0.48615
NTNG2	0.0257028	0.102574	0.303868	0.104366	0.30237
OGFOD1	-0.000103457	0.931304	-0.016436	0.921912	-0.0186895
LAMB1	-0.0447519	0.00227515	-0.535828	0.00177371	-0.546668
FBLN2	-0.0449571	0.00214694	-0.538386	0.0235759	-0.412282
OMD	-0.020622	0.338303	-0.181062	0.854599	-0.0349316
OSM	0.0164108	0.33448	0.182476	0.948827	-0.0122372
OVGP1	0.0128977	0.435826	0.147768	0.467985	-0.137724
FREM1	-0.0450135	0.00225691	-0.536184	0.177405	-0.252976
P4HA2	0.0268789	0.09269	0.312512	0.255555	0.214262
LAMC1	-0.0450275	0.00192467	-0.543151	0.0084325	-0.472133
P4HTM	0.0211833	0.129946	0.282812	0.639176	0.0892202
CRHBP	-0.0451963	0.00179741	-0.546099	0.0103481	-0.461008
PAPLN	-0.0167946	0.427694	-0.150371	0.427585	0.150406
PCSK5	-0.0455123	0.00117401	-0.563871	0.00225556	-0.536211
NRG2	-0.0458872	0.000478791	-0.598316	0.000518678	-0.595394
GLDN	-0.0460292	0.00114201	-0.564991	0.000710939	-0.583602
PCOLCE	0.0122709	0.337313	0.181427	0.440833	0.146179
BMP2	-0.0460341	0.000872796	-0.575683	0.000153641	-0.637001
COCH	-0.046053	0.00103568	-0.56892	0.000202258	-0.628101
FGFBP2	-0.0462408	0.000866675	-0.575958	0.000145272	-0.638781
PDGFA	2.34e-06	0.969712	-0.00723984	0.290345	-0.199577
PDGFB	-0.0168366	0.289503	-0.199919	0.0469752	-0.365558
PDGFC	0.0155802	0.292435	0.198732	0.377482	-0.167093
PDGFD	-0.0293322	0.0818575	-0.322829	0.247553	-0.217822
PGF	0.00459312	0.68234	0.0779196	0.814474	0.0447213
PI3	0.0222657	0.135105	0.27922	0.245578	0.218712
PIK3IP1	-0.0112406	0.655756	-0.0848461	0.735684	0.0643008
PLAT	0.00486327	0.873399	0.030376	0.487055	-0.131939
PLAU	0.0257762	0.138021	0.277234	0.848189	0.036489
ZFP91	-0.0463263	0.000477815	-0.59839	0.00746558	-0.478585
HSPG2	-0.0463754	0.000990501	-0.570697	0.00256789	-0.530426
PLOD3	0.00240584	0.989784	-0.0024414	0.357818	-0.17399
PLXDC1	-0.0243914	0.166459	-0.259295	0.926547	0.017577
PLXDC2	0.00506961	0.497021	0.128962	0.191993	0.244966
PLXNA1	0.00717455	0.649104	0.0865957	0.541861	0.115919
IGFBP6	-0.0464525	0.000826096	-0.577826	0.000188973	-0.630326
PLXNA3	0.0272675	0.167984	0.258398	0.488538	0.131494
CTSG	-0.0465429	0.00114132	-0.565016	2.88783e-05	-0.685727
PLXNB1	0.0178724	0.272404	0.206998	0.782878	0.0525086
NID1	-0.0467953	0.00151736	-0.553285	0.122577	-0.28813
VEGFC	-0.0468169	0.000690851	-0.584693	4.34555e-05	-0.674602
CLEC4G	-0.0470145	0.000461787	-0.599628	3.03578e-05	-0.684392
MFAP3	-0.0470768	0.00065406	-0.586765	0.00321246	-0.520191
FAM20B	-0.0470921	0.000592031	-0.590502	1.8849e-05	-0.696852
FIGF	-0.0471044	0.000833622	-0.577473	0.000231335	-0.623651
POMZP3	-0.0196305	0.142926	-0.273961	0.0428038	-0.372233
PRG4	-0.0471559	0.000450426	-0.600528	7.42427e-06	-0.719546
PRELP	-0.0270426	0.077302	-0.327483	0.04499	-0.368673
NGF	-0.0472812	0.000535508	-0.594221	8.82812e-05	-0.654133
MATN2	-0.047439	0.000191801	-0.629841	0.00158911	-0.551341
PRSS12	-0.00340698	0.731348	-0.0653952	0.699802	-0.0734231
TIMP4	-0.0475058	0.000613662	-0.589161	1.82017e-05	-0.697742
PSPN	-0.0220701	0.102137	-0.304237	0.0316144	-0.393147
EGFLAM	-0.0475725	0.000879335	-0.575391	0.000265794	-0.618979
PXDN	-0.00878273	0.579078	-0.105478	0.0975783	-0.308154
PXDNL	-0.019428	0.232558	-0.224704	0.247553	-0.217822
PZP	-0.0236711	0.129223	-0.283324	0.325589	-0.185803
COL15A1	-0.0476031	0.00052898	-0.594672	0.0148876	-0.440316
RSPO1	-0.0184971	0.230724	-0.225565	0.0588243	-0.348871
ADAMTSL3	-0.0479599	0.000513313	-0.595776	0.000228269	-0.624096
ADIPOQ	-0.04801	0.000679437	-0.585325	3.75855e-05	-0.678607
FBLN5	-0.0481345	0.000635489	-0.58785	0.00625988	-0.487707
CSPG4	-0.0482885	0.000586482	-0.590853	0.00223296	-0.536656
S100A11	0.0260796	0.0954599	0.310022	0.436626	0.147514
S100A12	-0.0271644	0.110709	-0.297214	0.0792098	-0.325509
ITIH5	-0.048294	0.000497637	-0.59691	0.000353059	-0.609189
IL20	-0.0483439	0.000303739	-0.614417	1.30541e-05	-0.706053
SPARCL1	-0.048456	0.000740538	-0.582043	0.196612	-0.242519
ITLN2	-0.0488017	0.000201562	-0.628214	3.16476e-05	-0.683275
S100A3	-0.00023193	0.917609	-0.0197229	0.437325	-0.147291
S100A4	0.0112635	0.503956	0.126908	0.337569	-0.181333
S100A6	0.000846466	0.94863	-0.0122843	0.139352	-0.276338
S100A8	-0.0281972	0.0716867	-0.333519	0.00639741	-0.486595
S100A9	-0.0142171	0.378252	-0.166827	0.133477	-0.280343
SERPINE3	-0.0489995	0.000208814	-0.62705	1.23044e-05	-0.707502
S100P	-0.0143804	0.384092	-0.164822	0.177799	-0.252753
SBSPON	-0.00472566	0.795172	-0.0494693	0.4132	-0.155078
COL25A1	-0.0492199	0.000385124	-0.606126	0.0168525	-0.432974
SCUBE2	-0.00866628	0.607215	-0.0977823	0.210929	-0.235176
SCUBE3	0.0150553	0.317239	0.188979	0.150957	0.268773
ANGPT2	-0.0493678	0.000497064	-0.596952	0.00639741	-0.486595
VTN	-0.0494116	0.000145598	-0.63871	1.4589e-05	-0.703304
SDC3	-0.0135021	0.343011	-0.179334	0.846359	-0.036934
SDC4	-0.0101699	0.480864	-0.133804	0.341805	-0.179775
SEMA3A	-0.0241066	0.124316	-0.286854	0.100668	-0.305484
ADAM33	-0.0494749	0.000422	-0.60287	0.0228418	-0.414284
ZP1	-0.049491	0.000263642	-0.619254	7.9854e-06	-0.717846
SEMA3E	-0.0053241	0.590713	-0.102277	0.102769	-0.303705
SEMA3F	0.0170555	0.430134	0.149587	0.621652	-0.0938925
GDF10	-0.0496434	0.0004574	-0.599973	0.0685261	-0.337079
SEMA4A	0.0251968	0.120026	0.290026	0.317451	0.188898
ANGPTL2	-0.0496904	0.000281379	-0.61704	6.28359e-05	-0.664145
SEMA4C	-0.0085403	0.516404	-0.123256	0.0673692	-0.338414
SEMA4D	0.00442913	0.756063	0.0591827	0.654351	0.0852153
SEMA4F	-0.0172098	0.208077	-0.236611	0.00506255	-0.498387
SEMA4G	0.0275779	0.0688815	0.336672	0.395772	0.160863
SEMA5A	-0.0279391	0.100132	-0.305944	0.25505	-0.214484
EGLN1	-0.0497236	0.000247185	-0.62143	0.0041234	-0.508399
CXCL2	-0.0498102	0.000223306	-0.624828	1.38243e-05	-0.704639
PCOLCE2	-0.0498405	0.000216828	-0.625805	5.22408e-07	-0.774057
SCUBE1	-0.0498888	0.000190445	-0.630073	2.44609e-06	-0.74402
IL7	-0.0500374	0.000348907	-0.609603	0.0030616	-0.522416
SVEP1	-0.0501228	0.000176506	-0.632544	2.56745e-05	-0.688842
LAMA2	-0.0501434	0.000319101	-0.612713	0.00740251	-0.47903
SERPINA3	-0.0127244	0.501747	-0.127561	0.303144	-0.19446
CD209	-0.0501642	0.00023567	-0.623031	0.000766709	-0.58071
SERPINB1	-0.0225617	0.135562	-0.278907	0.204335	-0.238514
SERPINB10	-0.0170012	0.229302	-0.226237	0.00108314	-0.567125
ANGPTL1	-0.0503067	0.000358814	-0.608622	0.0339927	-0.388252
SERPINB4	-0.0169538	0.33346	-0.182855	0.0446938	-0.369147
SERPINI1	-0.0503533	0.000158228	-0.636062	2.22152e-05	-0.692624
ANXA1	-0.0505325	0.000330753	-0.611468	0.00010228	-0.649683
SERPINB7	0.000245739	0.924874	-0.0179785	0.165483	-0.259873
MUC3A	-0.0508614	0.000102636	-0.649577	1.91804e-05	-0.696407
ADAMTS1	-0.0511362	0.00026384	-0.619229	0.00234795	-0.534431
SERPIND1	-0.0205256	0.177778	-0.252765	0.0577117	-0.350319
SERPINE1	0.0045285	0.595111	0.101074	0.753392	0.0598509
SERPINE2	0.0147338	0.280358	0.203671	0.225013	0.228279
CCBE1	-0.0513107	6.94255e-05	-0.661246	1.26296e-05	-0.706864
SERPINF1	-0.00630339	0.810904	-0.0455976	0.708499	-0.0711981
SERPINF2	-0.00147024	0.765214	0.0568977	0.485574	0.132384
SERPING1	-0.0270513	0.0731288	-0.331935	0.00275103	-0.527311
TINAGL1	-0.0515334	0.000105726	-0.648671	0.000915432	-0.573812
IGSF10	-0.0518375	8.05202e-05	-0.656879	0.00818992	-0.47369
ECM2	-0.0518823	0.00011341	-0.646517	4.78118e-05	-0.671932
TNFSF14	-0.0519532	5.92975e-05	-0.665816	5.0261e-06	-0.728446
GPC3	-0.0521196	9.14095e-05	-0.653087	2.63511e-07	-0.786072
HGF	-0.0522085	8.87927e-05	-0.65396	0.00679625	-0.48348
SFTPD	0.0123861	0.455003	0.141733	0.320362	0.187785
SLIT1	0.0141568	0.361094	0.172826	0.851559	0.0356699
SLIT2	-0.0251575	0.172078	-0.256016	0.974866	-0.00600734
IGFBP5	-0.052276	8.79728e-05	-0.654238	0.000592074	-0.5905
SLPI	0.0261525	0.121731	0.288755	0.274705	0.20603
ANGPTL5	-0.0522776	0.000147694	-0.638256	3.39824e-05	-0.681353
SMOC2	-0.0127137	0.504719	-0.126683	0.875722	-0.0298142
HPSE2	-0.0523882	0.000126583	-0.64311	0.000155454	-0.636627
SPARC	0.0190194	0.160161	0.263067	0.203467	0.238959
ITLN1	-0.0525046	4.30005e-05	-0.674895	6.67885e-06	-0.721994
SPOCK1	-0.0122052	0.632498	-0.0909946	0.672226	-0.0805429
CLEC3B	-0.0525198	6.65032e-05	-0.6625	0.000170496	-0.633663
IGFBP1	-0.0525332	0.000119003	-0.64503	3.12727e-05	-0.683595
SPON2	0.00964637	0.436852	0.147442	0.325054	0.186005
ADAMTSL4	-0.0525692	7.57076e-05	-0.658703	0.000670494	-0.585827
HYAL1	-0.0525933	4.53016e-05	-0.673443	0.000296939	-0.615196
LAMA4	-0.0526818	5.55505e-05	-0.667685	6.67885e-06	-0.721994
SRPX2	-0.000490173	0.900206	-0.0239077	0.0836437	-0.321059
A2M	-0.0527798	9.95898e-05	-0.650494	0.0777014	-0.327066
SULF1	0.0193294	0.191911	0.24501	0.567117	0.1088
SULF2	-0.00884514	0.648266	-0.0868167	0.785573	-0.0518411
CCL21	-0.0528442	7.75166e-05	-0.658005	0.000228269	-0.624096
EFEMP1	-0.052871	5.45445e-05	-0.668206	3.88248e-05	-0.677717
TDGF1	-0.00580667	0.602931	-0.098944	0.903398	-0.0231394
TECTA	-0.0183626	0.260409	-0.212138	0.225013	-0.228279
HCFC2	-0.0528853	0.000136516	-0.640743	0.0491787	-0.36222
TGFB1	-0.00859669	0.637271	-0.0897256	0.731277	0.0654133
TGFB2	0.00368629	0.935706	0.0153806	0.845445	-0.0371565
TGFB3	-0.00277156	0.983241	-0.00400531	0.975797	0.00578485
TGFBI	0.0220696	0.229859	0.225973	0.642536	0.0883302
TGM1	0.00397095	0.835922	0.0394762	0.372348	-0.168873
TGM2	-0.0104703	0.460656	-0.13998	0.189918	-0.246079
THBS1	-0.0177264	0.274876	-0.205958	0.0925883	-0.312604
SRPX	-0.0529436	8.98068e-05	-0.653619	0.000353059	-0.609189
SEMA6D	-0.0530491	2.9301e-05	-0.685339	0.000150454	-0.637668
TPO	-0.0534604	6.46272e-05	-0.663331	0.000900013	-0.57448
THPO	-0.022478	0.0808043	-0.323887	0.00085511	-0.576482
PAPPA	-0.0535224	8.48591e-05	-0.655316	0.00027825	-0.617421
TIMP1	-0.00937249	0.516531	-0.123219	0.0456912	-0.36756
TIMP2	-0.0214431	0.250019	-0.216717	0.455732	-0.141506
TIMP3	-0.0220829	0.191209	-0.245386	0.0809611	-0.323729
SLIT3	-0.0538794	3.56486e-05	-0.680052	0.00165736	-0.549561
ANGPT1	-0.0539864	2.89804e-05	-0.685633	4.70597e-05	-0.672377
CCL14	-0.053991	5.65714e-05	-0.667165	0.0880294	-0.316832
LGI4	-0.0540617	3.09001e-05	-0.683917	0.00346714	-0.516631
TNC	-0.0169486	0.302199	-0.194833	0.326824	-0.185338
TNF	0.023867	0.0753939	0.329495	0.121674	0.288797
TNFAIP6	-0.0177733	0.236574	-0.222832	0.33217	-0.183335
TNFSF10	0.00998831	0.740144	0.063177	0.625806	-0.0927801
TNFSF11	0.0098722	0.441147	0.146079	0.158828	0.263878
MASP1	-0.0542073	2.7165e-05	-0.687352	0.000766709	-0.58071
TNFSF13	0.0087741	0.526102	0.120441	0.457881	0.140839
TNFSF13B	-0.0201333	0.192477	-0.244708	0.638337	-0.0894427
VIT	-0.0542442	5.06699e-05	-0.670297	0.000431537	-0.602069
TNFSF15	0.0121696	0.513426	0.124126	0.191577	0.245189
TNFSF18	0.0201751	0.178118	0.252574	0.168503	0.258093
LGALS8	-0.0547005	9.91738e-06	-0.712718	6.66149e-07	-0.769607
TNFSF8	-0.0122889	0.655303	-0.0849652	0.735684	0.0643008
TNFSF9	-0.0088692	0.432563	-0.148809	0.198737	-0.241406
VWF	-0.0549053	2.27454e-05	-0.692012	0.007216	-0.480365
TNR	0.00061595	0.741066	0.062945	0.102758	0.303713
DPT	-0.0549103	3.15204e-05	-0.683383	0.0155788	-0.437646
COL6A6	-0.0550974	4.1667e-05	-0.675768	0.00772243	-0.476805
TSKU	-0.00279539	0.793472	-0.049889	0.195345	-0.243186
ANXA8	-0.0554103	9.64596e-06	-0.71338	1.73673e-05	-0.698932
OGN	-0.0557665	1.85367e-05	-0.697278	0.000802903	-0.57893
C1QTNF9	-0.0558307	7.29064e-06	-0.719968	3.52815e-06	-0.736233
VEGFB	-0.0251007	0.0861321	-0.31864	0.00319709	-0.520414
CCL13	-0.0560406	1.31622e-05	-0.70585	0.000165848	-0.634553
CCL23	-0.0561563	2.62979e-05	-0.688209	0.0652877	-0.340861
FGF10	-0.056366	1.05861e-05	-0.711151	7.86176e-06	-0.718211
FGF14	-0.0565769	1.65032e-05	-0.70022	2.93641e-05	-0.685282
ANGPTL7	-0.0570757	7.43092e-06	-0.719525	0.000445096	-0.600957
CLEC14A	-0.0572663	5.75345e-06	-0.725401	0.000153641	-0.637001
VWA5A	-0.00482066	0.683288	-0.0776746	0.347298	-0.177773
MSTN	-0.0575646	2.55783e-06	-0.743085	5.38701e-06	-0.726888
ABI3BP	-0.05763	7.91813e-06	-0.718044	0.00486136	-0.500389
VWC2	-0.0120862	0.500687	-0.127875	0.648433	-0.0867727
VWCE	-0.0113827	0.369215	-0.169966	0.510299	-0.125042
ADAMTS5	-0.0577324	7.09807e-06	-0.720589	1.08103e-05	-0.710646
MMRN1	-0.0579312	6.66802e-06	-0.722031	0.0177487	-0.429859
WFIKKN1	-0.0248982	0.0668845	-0.338978	0.125622	-0.285905
WFIKKN2	-0.0207184	0.228797	-0.226476	0.0721569	-0.332999
LTBP4	-0.0580184	8.17105e-06	-0.717307	0.000306693	-0.614084
WNT2B	-0.0583437	2.05188e-06	-0.747662	1.35427e-06	-0.756035
WISP2	-0.0286143	0.0842488	-0.320466	0.828107	-0.0413839
FGF2	-0.0583495	3.92899e-06	-0.733893	3.36881e-07	-0.781844
CHRDL1	-0.0584373	2.80311e-06	-0.741156	4.5029e-06	-0.730893
TNXB	-0.0584515	2.40941e-06	-0.744336	3.91403e-05	-0.677495
WNT11	0.00480397	0.800645	0.0481203	0.0925883	-0.312604
WNT16	0.0115435	0.285909	0.201384	0.0757379	0.329129
WNT2	0.00344895	0.697129	0.0741087	0.634149	0.0905551
KITLG	-0.0596003	9.06515e-07	-0.763823	7.49563e-06	-0.719324
WNT3	-0.0289881	0.0566427	-0.35173	0.000114869	-0.646123
WNT4	0.0171633	0.281867	0.203046	0.350989	0.176438
WNT5A	-0.0274477	0.067979	-0.337708	0.0429379	-0.37201
WNT5B	-0.00071674	0.949266	-0.0121319	0.505003	0.126599
PARM1	-0.0596434	1.27082e-06	-0.757288	0.000172863	-0.633218
MMRN2	-0.0597178	1.28446e-06	-0.757079	0.000464708	-0.599399
BMPER	-0.0597203	1.71728e-06	-0.751289	4.66876e-05	-0.6726
SEMA3G	-0.0600312	1.1234e-06	-0.759697	6.68122e-05	-0.662365
CRIM1	-0.0603596	8.2914e-07	-0.765515	1.03008e-06	-0.761375
XCL1	-0.01215	0.478666	-0.134469	0.564727	-0.109467
EMCN	-0.060466	6.16885e-07	-0.771025	9.02656e-05	-0.653465
RSPO3	-0.0606626	1.65864e-06	-0.75199	5.72673e-05	-0.666815
NTN4	-0.0615352	3.3514e-07	-0.781935	0.00345073	-0.516854
RELN	-0.0624511	3.69846e-07	-0.780213	0.00356702	-0.515296

## Sheet: Table S18
Supplementary Table 18: Loading weight matrix of the first latent variable from PLS regression on all protein-coding genes vs tissue modulus. Univariate correlation coefficients and pvalues are included.
Filtered applied to display top 113 genes (loading weight >|0.014|)
PLS model weights		univariate correlations
genes	loading.weights	pearson.pvalues	pearson.rvalues	spearman.pvalues	spearman.rvalues
PPEF1	0.0154284	1.29908e-10	0.881225	4.95327e-06	0.728772
SLC39A4	0.0154143	7.45481e-10	0.864394	0.00235973	0.534208
GRM4	0.0154013	4.44884e-11	0.890439	2.27414e-08	0.823578
SLC35D3	0.015333	2.76147e-10	0.874251	7.18839e-07	0.768193
MMP11	0.0152482	6.63933e-10	0.865585	2.55232e-06	0.74313
CLEC18B	0.0151408	4.15024e-09	0.845344	0.000410546	0.603854
MFSD3	0.0150232	9.99266e-09	0.834491	0.00100163	0.570253
PAX2	0.014998	6.5012e-09	0.8399	0.0186249	0.426937
APBA2	0.0149736	1.03184e-08	0.834079	1.12038e-07	0.800089
SPINT1	0.0149556	5.21063e-09	0.842609	2.07742e-07	0.790077
TENM4	0.0148885	1.01222e-08	0.834326	4.41324e-06	0.731338
COL10A1	0.0147605	5.80371e-09	0.841296	1.866e-07	0.791857
SLC44A4	0.0147066	2.85269e-08	0.820434	2.03783e-06	0.747803
RHPN1	0.0146786	1.8516e-08	0.826378	1.69229e-06	0.751585
PTPRU	0.0146717	2.01706e-08	0.825218	5.21439e-05	0.669485
HOPX	0.0145895	2.89154e-08	0.820244	1.68178e-05	0.699744
CD164L2	0.0145552	1.67271e-07	0.793653	0.000628793	0.588248
FAM181A	0.0145292	2.23465e-08	0.823819	1.27351e-05	0.70666
LMTK3	0.0144302	8.15879e-08	0.805024	0.000355306	0.608967
RBBP8NL	0.0143836	1.0574e-07	0.800999	3.63469e-06	0.735589
CYB561	0.0143774	1.01145e-07	0.801695	0.000162437	0.635221
ZNF250	0.0143739	2.17319e-07	0.789324	1.24021e-05	0.707309
COL11A1	0.0142225	9.98425e-08	0.801898	2.56919e-08	0.821893
GSTO2	0.0142213	4.24072e-07	0.777797	0.000413166	0.603627
AQP5	0.0142109	9.17229e-08	0.803218	0.00177371	0.546668
FAM174B	0.0142042	1.12361e-07	0.800044	9.43541e-05	0.65213
SBK1	0.0142032	8.17024e-08	0.805002	5.17191e-08	0.811881
ETV4	0.0139536	1.30952e-07	0.797611	0.00075351	0.581377
HAPLN1	0.0141577	4.18929e-07	0.778014	7.31595e-05	0.659711
ST6GALNAC5	0.0141463	5.79988e-08	0.810183	5.41993e-07	0.77339
MRGBP	0.0141414	8.20606e-07	0.76571	0.00182976	0.545333
ST6GALNAC2	0.0137321	1.96591e-07	0.790994	0.00142144	0.556013
INHBA	0.0139782	2.00895e-07	0.790634	2.31864e-05	0.691512
TMEM92	0.0139467	2.11425e-07	0.789784	2.60699e-06	0.742686
CARD9	0.0141217	6.84112e-07	0.769114	7.71341e-06	0.718656
SLC24A2	0.0141127	9.31034e-08	0.802986	3.93163e-05	0.677371
COMP	0.0141089	1.37011e-07	0.796886	1.9517e-05	0.695962
TMEM221	0.0138521	2.53475e-07	0.786732	3.11227e-05	0.683725
LRRC15	0.0140873	1.67439e-07	0.793636	0.000247216	0.621426
SERINC2	0.013972	2.74853e-07	0.785353	3.03981e-07	0.783624
H2AFY2	0.0139928	2.8341e-07	0.784829	2.96517e-08	0.819891
LIX1	0.0139984	2.8987e-07	0.784442	6.40607e-06	0.722951
PRSS22	0.0136869	2.93521e-07	0.784227	8.68567e-07	0.764635
CLDN9	0.0137503	3.59985e-07	0.780687	0.000309062	0.613818
SAMD10	0.014082	4.07383e-07	0.778509	0.000109201	0.647681
LEMD1	0.0140458	2.53657e-07	0.786719	1.69678e-06	0.751532
DNAJB13	0.0140441	1.23793e-07	0.798508	6.92478e-06	0.72116
PLEKHB1	0.0139212	4.42884e-07	0.777025	0.00040047	0.604739
ST14	0.0139605	4.52825e-07	0.776629	9.09779e-09	0.835688
C15orf62	0.0140302	5.87247e-07	0.771928	0.0163574	0.434754
EMX2	0.014029	2.22699e-07	0.788915	3.82552e-07	0.77962
SCXA	0.0139591	4.9493e-07	0.775033	0.0109895	0.45767
ARHGAP39	0.0139333	5.14425e-07	0.774336	0.000281902	0.616976
STARD10	0.0139892	5.30615e-07	0.773775	0.000369056	0.607632
MMP13	0.0140135	2.48477e-07	0.787069	4.45359e-05	0.673919
ZNF48	0.0139182	6.0965e-07	0.771241	0.000574636	0.591612
GPR39	0.0137093	6.25382e-07	0.770773	5.82802e-06	0.725108
RNF183	0.0137596	6.30154e-07	0.770633	0.000258551	0.619914
CCDC167	0.0140103	4.92554e-07	0.77512	0.000784623	0.57982
SERPINB5	0.013803	6.90998e-07	0.768928	1.50572e-06	0.75393
ARHGEF19	0.0136663	6.91153e-07	0.768924	1.23717e-06	0.757815
GALNT6	0.0138387	7.37764e-07	0.767708	1.69729e-07	0.793414
FAM19A5	0.0136367	7.37935e-07	0.767704	0.00126938	0.560685
FOXQ1	0.0136947	7.4276e-07	0.767582	0.000171272	0.633517
PPAP2C	0.0137038	7.50618e-07	0.767385	0.0142221	0.442986
LLGL2	0.0136795	7.50933e-07	0.767377	0.000426216	0.602514
CLDN6	0.0137451	7.77371e-07	0.766729	0.000434191	0.601849
KLK6	0.0138753	8.0404e-07	0.766094	0.000702683	0.584047
PODNL1	0.0135454	8.18284e-07	0.765763	1.433e-05	0.703749
SDC1	0.0140064	4.85419e-07	0.775382	5.28158e-06	0.727333
CXXC5	0.0138624	8.80475e-07	0.764377	0.000234437	0.623206
COL22A1	0.0135783	9.06836e-07	0.763816	2.88783e-05	0.685727
CHST1	0.0136594	9.19401e-07	0.763554	5.82802e-06	0.725108
UGT2B7	0.013627	9.22188e-07	0.763496	5.37305e-05	0.668634
ZNF707	0.0138856	9.46368e-07	0.763002	0.00115688	0.564468
TMPRSS4	0.013659	1.04239e-06	0.761146	3.08395e-06	0.739126
LRRN2	0.0137111	1.13043e-06	0.759576	6.11994e-06	0.723996
MARVELD3	0.0134716	1.18704e-06	0.758624	4.50332e-07	0.776727
SLC37A4	0.0139208	1.18715e-06	0.758622	0.000609975	0.589387
SMYD3	0.0137171	1.21731e-06	0.758132	0.00682553	0.483257
TRIM29	0.0135568	1.24865e-06	0.757634	0.0227614	0.414507
PNOC	0.0135784	1.32976e-06	0.756396	2.02061e-05	0.695072
RASAL1	0.0134324	1.35146e-06	0.756076	0.000194436	0.629395
ALPK2	0.0134535	1.37792e-06	0.755693	2.60087e-07	0.786294
PDE6B	0.0138729	1.40311e-06	0.755334	1.68178e-05	0.699744
MFAP2	0.0135383	1.41446e-06	0.755174	5.82802e-06	0.725108
KRT17	0.0133492	1.45027e-06	0.754677	2.25992e-05	0.692179
MFSD6L	0.0135382	1.45255e-06	0.754646	1.0346e-06	0.761291
TPRN	0.0137777	1.49386e-06	0.754087	0.00950316	0.46568
EMC10	0.0137694	1.49627e-06	0.754055	0.00146769	0.554678
BMPR1B	0.013811	1.57814e-06	0.75299	4.17479e-05	0.675715
MAGEF1	0.0134901	1.59111e-06	0.752826	0.000274639	0.617866
DOK7	0.0135615	1.64206e-06	0.752192	0.000146295	0.638558
TMPRSS13	0.0131783	1.66837e-06	0.751872	2.34118e-07	0.788074
ITM2C	0.0135984	1.67006e-06	0.751852	0.000647208	0.587162
CCDC33	0.0137143	1.69729e-06	0.751526	9.0626e-05	0.653346
TMEM231	0.0135237	1.71116e-06	0.751361	0.0097384	0.464345
MAG	0.0134421	1.7271e-06	0.751174	0.00038079	0.606527
CCNO	0.0133863	1.74177e-06	0.751003	6.35932e-07	0.770465
EPYC	0.0132677	1.76275e-06	0.75076	9.09359e-05	0.653243
LOXL1	0.0131186	1.80583e-06	0.750271	0.00018138	0.631661
UNC5B	0.0134848	1.82362e-06	0.750072	9.71707e-05	0.65124
EPHA1	0.0136543	1.88503e-06	0.749398	1.00028e-07	0.801869
LGR6	0.0131868	1.90739e-06	0.749157	2.98572e-05	0.684837
LYPD1	0.0133678	2.09933e-06	0.747191	0.000174058	0.632996
MROH6	0.0136125	2.19008e-06	0.746318	0.0025426	0.530871
F2RL1	0.0132877	2.24871e-06	0.745771	8.38014e-05	0.65569
C1orf172	0.0134413	2.32505e-06	0.745078	6.51298e-05	0.663106
KLRG2	0.0132543	2.51824e-06	0.743412	3.02718e-05	0.684468
FAM131C	0.0133787	2.53031e-06	0.743312	0.000142239	0.639448
TMEM139	0.0133346	2.58379e-06	0.742873	6.2354e-05	0.664368
FOXJ1	0.0133277	2.89093e-06	0.740502	0.00558452	0.493492
KRT80	0.0133643	2.97102e-06	0.739921	0.000236001	0.622984
TSSC1	0.0133807	3.09155e-06	0.739073	0.000369056	0.607632
MMP7	0.0133253	3.13648e-06	0.738765	1.60725e-07	0.794304
ARMC3	0.0130361	3.43775e-06	0.736794	2.64148e-05	0.688092
WNT7A	0.0129576	3.46321e-06	0.736635	0.000214724	0.626128
C9orf16	0.0134256	3.58539e-06	0.735885	0.000802903	0.57893
2012-09-08	0.0133903	3.6396e-06	0.735559	8.40145e-06	0.716654
CLEC18C	0.0126262	3.66034e-06	0.735436	0.000834757	0.577421
CADM1	0.0132718	3.72417e-06	0.73506	0.0104317	0.460563
MEX3A	0.0130735	3.73552e-06	0.734994	0.000100797	0.650128
CLDN16	0.0132855	3.7749e-06	0.734766	0.000329156	0.611636
GABRG3	0.0133488	3.8771e-06	0.734184	0.00313944	0.521257
C9orf116	0.0131183	3.99077e-06	0.733552	0.00607156	0.489265
SLC52A2	0.0135301	4.00808e-06	0.733457	0.0193766	0.424519
2012-03-08	0.0132567	4.01385e-06	0.733426	0.00251753	0.531316
CLEC18A	0.0132035	4.09717e-06	0.732975	0.0127157	0.449438
SYNE4	0.0131326	4.14137e-06	0.732739	0.00124209	0.561575
PYCR1	0.0132577	4.23451e-06	0.73225	7.31985e-05	0.659695
CELF5	0.0134495	4.34589e-06	0.731678	0.000138973	0.640181
OVOL2	0.0130677	4.4349e-06	0.73123	4.01454e-05	0.676796
LAD1	0.0131509	4.46543e-06	0.731078	0.000120797	0.644566
ZBTB12	0.0132074	4.54647e-06	0.73068	0.000188973	0.630326
LRRC55	0.013131	4.56684e-06	0.730581	0.000845403	0.576927
CLEC5A	0.0131344	4.63118e-06	0.73027	1.71169e-05	0.699299
PPAPDC1A	0.0130708	4.83559e-06	0.729309	2.89655e-06	0.740461
CST1	0.0133872	4.84383e-06	0.729271	3.65148e-08	0.816938
GPRC5C	0.0131409	4.84714e-06	0.729256	0.000442354	0.601179
PVRL4	0.0129074	4.90937e-06	0.728971	7.68778e-07	0.766937
CCDC64B	0.0129459	4.94667e-06	0.728802	7.4993e-05	0.658982
LPO	0.0134682	5.03394e-06	0.728411	0.010198	0.461814
DYDC2	0.0134852	5.09345e-06	0.728148	0.00136965	0.557553
LAMP5	0.0125461	5.12825e-06	0.727995	1.2232e-06	0.758038
C1orf106	0.0129072	5.14158e-06	0.727937	0.000628349	0.588275
CDKN2A	0.0129518	5.21352e-06	0.727625	2.31864e-05	0.691512
LYPD6B	0.0129427	5.22244e-06	0.727587	3.90279e-05	0.677574
ARMC7	0.0133576	5.29499e-06	0.727276	7.15528e-05	0.660363
ATP2C2	0.013558	5.71102e-06	0.725569	0.0017871	0.546346
TFAP2A	0.0127762	5.8954e-06	0.724847	8.01241e-05	0.657025
CYP26A1	0.0126257	6.00006e-06	0.724447	0.0271658	0.403167
PLEKHS1	0.0132823	6.09655e-06	0.724083	0.0031931	0.520472
WDR34	0.0133854	6.15006e-06	0.723884	0.000327055	0.611859
FBXW9	0.0129268	6.31032e-06	0.723296	0.000670494	0.585827
PRAME	0.0129952	6.31612e-06	0.723275	8.59796e-05	0.654924
SYT13	0.0132219	6.37497e-06	0.723063	2.01378e-05	0.695159
CUTA	0.0127637	6.3937e-06	0.722995	0.0326782	0.390922
EPHB3	0.0132275	6.39805e-06	0.72298	0.000802903	0.57893
RNF43	0.0128975	6.41492e-06	0.72292	0.000371393	0.607409
SAYSD1	0.0130316	6.51798e-06	0.722554	0.00241938	0.533096
SMIM22	0.013175	6.58088e-06	0.722333	0.000308236	0.613911
ZNF16	0.0133077	6.58802e-06	0.722308	0.000423578	0.602737
SOWAHB	0.0131842	6.66098e-06	0.722055	1.90997e-05	0.696514
IL4I1	0.012922	6.67972e-06	0.721991	7.86176e-06	0.718211
GPR68	0.0127102	6.918e-06	0.721183	0.00125567	0.56113
SPATA17	0.0127923	6.92053e-06	0.721174	0.00040047	0.604739
B3GNT3	0.0131721	7.05705e-06	0.720723	3.75203e-06	0.734898
PAX8	0.0128113	7.29396e-06	0.719957	0.00022524	0.624541
CD1A	0.0133069	7.34674e-06	0.71979	0.00086843	0.575879
C1orf186	0.0128704	7.49775e-06	0.719317	3.13815e-05	0.683502
GCNT3	0.0127345	7.50233e-06	0.719303	1.80135e-06	0.750321
HINFP	0.0129968	7.55515e-06	0.719139	0.0196596	0.423629
PRRG2	0.0130055	7.56802e-06	0.7191	0.00596612	0.490155
DCDC2	0.0128299	7.59542e-06	0.719016	7.71341e-06	0.718656
LOXL4	0.0131927	7.66667e-06	0.718798	0.0012902	0.560018
PKP3	0.012968	7.90014e-06	0.718097	0.000150454	0.637668
CCDC24	0.0126698	7.94954e-06	0.717951	0.00368667	0.513739
CRABP1	0.0133413	8.17463e-06	0.717297	0.000813161	0.578438
C5orf49	0.0125706	8.36132e-06	0.716766	0.00522391	0.496829
KRTCAP3	0.0129786	8.55243e-06	0.716234	0.00464586	0.502614
UXS1	0.012911	8.56788e-06	0.716192	5.95315e-05	0.665703
HN1	0.0130191	8.78102e-06	0.715611	0.000431537	0.602069
SLC5A1	0.0130376	8.97804e-06	0.715086	0.000633913	0.587943
OVOL1	0.0124736	9.57492e-06	0.713557	5.79382e-06	0.725242
FKBPL	0.0130124	9.60722e-06	0.713476	0.0173599	0.431194
MGAT5B	0.0128645	9.64443e-06	0.713384	0.0230033	0.413839
PFN2	0.0128015	9.66968e-06	0.713322	9.36615e-05	0.652353
PKM	0.0132175	9.94699e-06	0.712646	0.000264056	0.619201
CDH6	0.0127558	1.00041e-05	0.712509	0.00104733	0.568473
C1orf210	0.0128872	1.02786e-05	0.71186	6.25225e-05	0.66429
C6orf1	0.0126066	1.0359e-05	0.711673	0.000159087	0.635888
AZI1	0.0131498	1.0584e-05	0.711156	0.0035502	0.515519
PLEKHG4B	0.0127193	1.07137e-05	0.710863	5.54873e-06	0.726221
NPM3	0.0131816	1.07264e-05	0.710834	0.000114869	0.646123
KIF26B	0.0126227	1.08795e-05	0.710492	4.19611e-06	0.732451
C16orf59	0.0129177	1.09901e-05	0.710248	4.27651e-05	0.675047
ST8SIA2	0.0127013	1.0998e-05	0.710231	0.000114043	0.646346
NAT14	0.0128361	1.11787e-05	0.709836	0.000757887	0.581155
FAM135B	0.0124179	1.1217e-05	0.709754	0.0155659	0.437695
KRT23	0.0125141	1.13584e-05	0.70945	7.10117e-05	0.660585
RHOV	0.0127611	1.13688e-05	0.709428	0.00244037	0.53271
ESPN	0.0128394	1.1429e-05	0.7093	0.000465281	0.599355
GJB2	0.0130375	1.16044e-05	0.70893	0.014663	0.441206
CPSF1	0.0127951	1.16165e-05	0.708905	3.85116e-05	0.67794
CACNA1B	0.0128301	1.20359e-05	0.708041	1.41652e-06	0.755145
CRTAC1	0.0131061	1.20555e-05	0.708001	0.00176452	0.546891
EPN3	0.0128274	1.20912e-05	0.707929	5.16001e-05	0.669782
CCND1	0.0124476	1.21067e-05	0.707898	0.000395489	0.605184
C10orf35	0.0129211	1.21496e-05	0.707812	0.0169781	0.432529
ZNF853	0.0126774	1.22215e-05	0.707668	5.6036e-06	0.725998
ZNF365	0.0125685	1.24516e-05	0.707211	3.63818e-05	0.679497
TMED3	0.0129867	1.25508e-05	0.707017	1.18495e-05	0.708421
RHOF	0.0128372	1.29606e-05	0.706229	7.5676e-06	0.719101
EFNA4	0.0127485	1.2968e-05	0.706215	1.59484e-05	0.701079
MCM2	0.01284	1.30395e-05	0.70608	2.81255e-07	0.784959
PNMA3	0.0128553	1.31456e-05	0.705881	2.81631e-05	0.686394
DTNB	0.0129348	1.31627e-05	0.705849	5.21439e-05	0.669485
SST	0.0128035	1.32769e-05	0.705636	0.00368615	0.513746
XXYLT1	0.0126838	1.36725e-05	0.704912	2.60699e-06	0.742686
RAB8A	0.0129499	1.38067e-05	0.704671	0.000170496	0.633663
MYCL	0.0125261	1.4017e-05	0.704296	9.18052e-08	0.803204
GRHL2	0.0126773	1.43278e-05	0.703753	0.000521966	0.595162
ALDH3B2	0.012847	1.4532e-05	0.703401	0.000464708	0.599399
PTDSS1	0.0130757	1.47291e-05	0.703066	0.00639741	0.486595
SLC35F3	0.0127356	1.47723e-05	0.702994	6.56336e-05	0.662883
TRIM59	0.0129168	1.49503e-05	0.702695	5.28158e-06	0.727333
FBXO32	0.0121705	1.50675e-05	0.7025	5.81636e-05	0.66637
CCDC65	0.0124631	1.5165e-05	0.70234	0.00445895	0.504617
LSM2	0.0126742	1.52083e-05	0.702268	0.000500106	0.596729
PRSS33	0.0130718	1.55424e-05	0.701725	0.00112557	0.565577
SUSD4	0.012493	1.56697e-05	0.701521	0.00018138	0.631661
GLB1L2	0.0126995	1.57404e-05	0.701408	0.0519303	0.358216
ABCC4	0.012676	1.57675e-05	0.701365	2.72342e-05	0.687284
IRF6	0.0126336	1.59187e-05	0.701126	1.32409e-06	0.75648
MDK	0.0125311	1.64199e-05	0.700347	5.25048e-08	0.811659
ASCL2	0.0127692	1.66249e-05	0.700035	1.72682e-05	0.699077
CTHRC1	0.0123579	1.66811e-05	0.69995	4.41324e-06	0.731338
DRD4	0.0126574	1.67207e-05	0.69989	0.0235759	0.412282
TLDC2	0.0128687	1.67321e-05	0.699873	0.000903656	0.574321
CMTM7	0.0123146	1.67475e-05	0.69985	4.31091e-05	0.674825
TARBP2	0.012803	1.70943e-05	0.699332	0.0040665	0.509067
GPR173	0.013124	1.71708e-05	0.69922	0.000250506	0.620981
FBXL6	0.0131367	1.72231e-05	0.699143	0.0162964	0.434976
TACSTD2	0.0125997	1.74056e-05	0.698876	0.000162437	0.635221
C20orf85	0.0121771	1.74882e-05	0.698756	0.000181256	0.631683
ESRP1	0.0125892	1.76692e-05	0.698495	3.11227e-05	0.683725
FN1	0.0124855	1.7778e-05	0.69834	0.00196655	0.542218
SPEF1	0.0119685	1.8423e-05	0.697434	0.0129654	0.448326
DLX3	0.0124389	1.93797e-05	0.696142	0.00130226	0.559635
LAMB3	0.0125004	1.98708e-05	0.695501	0.00200723	0.541328
HMGB3	0.0130259	1.99919e-05	0.695345	0.00202784	0.540883
FHAD1	0.0125419	2.00704e-05	0.695245	8.80715e-06	0.715541
TMEM125	0.0126516	2.0217e-05	0.695058	0.000295022	0.615419
WNT6	0.0125344	2.03564e-05	0.694881	0.00670906	0.484147
WNT10A	0.0124024	2.06992e-05	0.694452	0.000214915	0.626099
PIPOX	0.0129185	2.12662e-05	0.693754	1.27996e-06	0.757148
NKD2	0.012343	2.14148e-05	0.693575	0.00727772	0.47992
B4GALNT3	0.0127127	2.1594e-05	0.693359	2.04985e-07	0.790299
B3GALT5	0.0126373	2.18821e-05	0.693016	8.47059e-05	0.65537
PROM2	0.012585	2.19801e-05	0.6929	0.000557652	0.592724
RASGEF1A	0.0123125	2.20066e-05	0.692869	2.00318e-05	0.695294
GMDS	0.0125867	2.21617e-05	0.692687	0.00107681	0.56736
HECW1	0.0121565	2.29268e-05	0.691805	4.15386e-06	0.732673
PRSS21	0.0125082	2.31349e-05	0.69157	4.41559e-05	0.674157
MOXD1	0.0121707	2.35899e-05	0.691062	2.16217e-07	0.789409
FAM90A1	0.0125618	2.36121e-05	0.691037	3.74821e-05	0.678683
GALNT3	0.0121825	2.36271e-05	0.691021	9.4931e-06	0.713761
SYNGR2	0.0128625	2.3827e-05	0.690801	0.00857382	0.471243
GALNT14	0.0124219	2.38475e-05	0.690778	0.0695019	0.335966
PPP1R14C	0.0129785	2.3934e-05	0.690684	0.000171302	0.633511
SORD	0.0131645	2.40207e-05	0.690589	0.000420953	0.602959
FSTL4	0.0127448	2.42917e-05	0.690296	0.000115091	0.646063
STRA6	0.0125126	2.47416e-05	0.689815	6.73247e-05	0.662143
LRRC46	0.0123734	2.48289e-05	0.689722	0.0143861	0.442318
KCNC3	0.0123559	2.51195e-05	0.689417	2.65275e-08	0.821448
VDR	0.0127474	2.53357e-05	0.689191	0.00188734	0.543998
CNGB1	0.0125583	2.53549e-05	0.689172	0.00113835	0.565121
RPL39L	0.0129416	2.56659e-05	0.688851	0.0209005	0.419846
KREMEN2	0.0128685	2.6294e-05	0.688213	0.00327051	0.519359
ARRDC1	0.0127124	2.64411e-05	0.688066	0.00818992	0.47369
EPCAM	0.0124237	2.65417e-05	0.687966	0.000113223	0.646568
ACTL10	0.0126942	2.65447e-05	0.687963	0.000439628	0.601402
GJB1	0.0124129	2.71914e-05	0.687326	0.00046702	0.59922
SLC6A12	0.0121004	2.72108e-05	0.687307	7.38729e-08	0.806541
ZNF165	0.0126182	2.76268e-05	0.686905	0.00124209	0.561575
SGPL1	0.0123555	2.76329e-05	0.686899	0.000946965	0.572477
PNMAL1	0.0122938	2.77793e-05	0.686759	0.000111599	0.647013
SALL1	0.0120666	2.82106e-05	0.68635	0.000152233	0.637294
SPINT2	0.0123075	2.82247e-05	0.686336	4.73429e-06	0.729781
APH1A	0.0126412	2.83081e-05	0.686258	0.00464586	0.502614
WDR54	0.0128514	2.85799e-05	0.686004	0.0056093	0.49327
EPHX3	0.0125229	2.86948e-05	0.685897	0.000143243	0.639226
RSPO4	0.0124702	2.8706e-05	0.685886	0.000431537	0.602069
SLC35C2	0.0125447	2.87369e-05	0.685858	0.00167482	0.549116
TRAF2	0.0128691	2.87474e-05	0.685848	0.00679625	0.48348
GID8	0.0128879	2.87757e-05	0.685822	0.00691401	0.48259
SHMT2	0.0129802	2.88935e-05	0.685713	0.0662275	0.339749
EVA1A	0.012354	2.89579e-05	0.685654	0.000423578	0.602737
DNAH3	0.0127199	2.89933e-05	0.685621	0.000146174	0.638584
MAST1	0.0126183	2.89967e-05	0.685618	0.00171916	0.548003
C2orf54	0.0128064	2.91038e-05	0.68552	1.71355e-05	0.699272
ILDR1	0.0122705	2.92326e-05	0.685402	3.42544e-06	0.736871
TTLL9	0.0121389	3.02077e-05	0.684525	0.00264505	0.529091
VANGL2	0.0122367	3.07222e-05	0.684072	0.000234437	0.623206
PRSS1	0.0126466	3.09489e-05	0.683875	3.07495e-05	0.684048
FIBP	0.01262	3.09551e-05	0.68387	0.00391802	0.510847
VSTM2L	0.0119335	3.10282e-05	0.683806	0.00332183	0.518634
GJB3	0.0123332	3.13541e-05	0.683526	0.000671401	0.585776
LEF1	0.0124532	3.13863e-05	0.683498	1.17417e-05	0.708644
ZNF443	0.0124807	3.14764e-05	0.683421	7.64019e-06	0.718879
COL8A2	0.0118826	3.16302e-05	0.68329	3.9458e-05	0.677272
SLC12A8	0.0123302	3.17283e-05	0.683206	0.00447939	0.504394
ITGBL1	0.0117306	3.26547e-05	0.682431	2.60699e-06	0.742686
S100A2	0.0121809	3.32213e-05	0.681966	0.00775505	0.476582
FARP1	0.0123902	3.32723e-05	0.681925	3.0203e-06	0.739571
CDS1	0.0123574	3.37718e-05	0.681521	0.000666563	0.58605
RTKN	0.012495	3.38805e-05	0.681434	0.0177487	0.429859
MARVELD2	0.0125844	3.46082e-05	0.680858	0.00234795	0.534431
ARSE	0.0117177	3.46425e-05	0.680831	0.00022675	0.624319
CNKSR1	0.0122531	3.54019e-05	0.680241	0.00137645	0.557348
CDSN	0.0121932	3.55377e-05	0.680137	2.77381e-05	0.686798
MYL6B	0.0124456	3.55601e-05	0.68012	0.039058	0.378685
RGS10	0.0124996	3.55788e-05	0.680106	1.25154e-05	0.707086
KCNT1	0.0128229	3.55967e-05	0.680092	0.0214298	0.418289
IL17RB	0.0123906	3.56386e-05	0.68006	9.36615e-05	0.652353
KRT14	0.0120187	3.56579e-05	0.680045	0.200448	0.240516
MUC5B	0.0120247	3.66291e-05	0.679312	0.00286743	0.525423
CAPN13	0.0122435	3.687e-05	0.679133	0.000336007	0.610919
SOX11	0.0117321	3.75106e-05	0.678662	1.08103e-05	0.710646
FBXL22	0.011572	3.75142e-05	0.678659	0.000280071	0.617199
IKBKE	0.0125765	3.75155e-05	0.678658	2.07372e-05	0.694404
ATP6V1B1	0.0123242	3.76173e-05	0.678584	0.00273759	0.527534
C1orf116	0.0119666	3.76327e-05	0.678573	0.000287819	0.616266
BSPRY	0.0120951	3.82332e-05	0.678139	1.24021e-05	0.707309
BGN	0.0118908	3.91196e-05	0.677509	0.000185142	0.630993
CLNS1A	0.0123246	4.06963e-05	0.67642	0.107068	0.300145
CELSR2	0.012278	4.15051e-05	0.675876	0.000567789	0.592057
CBLC	0.0121779	4.17285e-05	0.675728	0.0033442	0.518321
DPY30	0.0129027	4.19359e-05	0.67559	0.0309897	0.394482
NCMAP	0.0123772	4.19437e-05	0.675585	0.000442354	0.601179
PDIA5	0.0121711	4.24234e-05	0.67527	0.000557652	0.592724
HSF2BP	0.0122673	4.29686e-05	0.674915	8.44287e-05	0.655468
EFNA3	0.0122161	4.35137e-05	0.674565	0.00237156	0.533986
SH2D3A	0.0120825	4.35249e-05	0.674558	0.000252165	0.620759
CNPY3	0.0119875	4.43299e-05	0.674048	0.000219287	0.625431
ZNF512	0.0121161	4.43945e-05	0.674007	4.41324e-06	0.731338
SMARCD3	0.0123419	4.51657e-05	0.673527	0.0968171	0.308822
CLDN10	0.0118554	4.53643e-05	0.673404	0.000606357	0.58961
SMPX	0.0118866	4.57796e-05	0.67315	0.000531478	0.594499
CHPF	0.0119433	4.62382e-05	0.672871	0.00173718	0.547558
SLC35F2	0.0123111	4.64655e-05	0.672733	0.00531807	0.495939
RPS3	0.0123654	4.7286e-05	0.672243	0.03558	0.385137
CDCA4	0.0122463	4.73937e-05	0.672179	1.29779e-05	0.706196
SULT2B1	0.0129396	4.73983e-05	0.672176	0.00157027	0.551843
RNF5	0.0121535	4.78604e-05	0.671904	0.0541534	0.355101
AUNIP	0.0122282	4.7894e-05	0.671884	3.38485e-05	0.68146
CCDC160	0.012227	4.82439e-05	0.67168	8.95998e-05	0.653688
PRR7	0.0124102	4.83048e-05	0.671644	0.0275423	0.402269
FAM136A	0.0125874	4.85283e-05	0.671514	0.000105306	0.648793
UNC5CL	0.011784	4.86724e-05	0.671431	9.22897e-05	0.652798
RSPH1	0.0118827	4.94222e-05	0.671	0.00439809	0.505284
KCNIP4	0.0113117	4.96339e-05	0.67088	0.000311159	0.613585
RBP1	0.0123975	4.97055e-05	0.670839	2.63329e-05	0.688174
FZD2	0.0124907	4.97337e-05	0.670823	0.000359838	0.608522
CDH1	0.0120365	4.98183e-05	0.670775	0.000350824	0.609412
DIRAS2	0.0117086	5.03811e-05	0.670458	8.88285e-06	0.715339
CDC20B	0.0120253	5.04343e-05	0.670428	3.4538e-05	0.680913
S100A14	0.0121883	5.0483e-05	0.670401	0.00348362	0.516409
KLHL14	0.0122423	5.07473e-05	0.670253	0.000459029	0.599844
DPEP1	0.0121461	5.09675e-05	0.670131	6.9769e-05	0.661102
RAB25	0.0120106	5.10492e-05	0.670086	0.000275882	0.617713
AIM1L	0.011925	5.11402e-05	0.670035	4.83833e-08	0.812862
SCNN1A	0.0119951	5.1757e-05	0.669696	0.000602758	0.589832
SLC13A5	0.0121944	5.21197e-05	0.669498	0.335763	0.182
CTSV	0.0123449	5.21329e-05	0.669491	6.99403e-05	0.66103
TDP1	0.0122564	5.25031e-05	0.66929	1.32148e-05	0.705751
HMGA2	0.0116602	5.26767e-05	0.669197	0.000952311	0.572255
CAPN1	0.0124665	5.30129e-05	0.669016	0.000240751	0.622316
EMID1	0.012426	5.3094e-05	0.668973	0.00283291	0.525976
NR2F6	0.0126197	5.39238e-05	0.668532	0.0459741	0.367115
FHL3	0.0116093	5.52494e-05	0.66784	0.000150454	0.637668
CCHCR1	0.0122593	5.56242e-05	0.667647	0.000410599	0.603849
TONSL	0.0124157	5.56937e-05	0.667611	0.000864915	0.576037
ITPA	0.0121668	5.58596e-05	0.667527	0.0708861	0.334409
OXLD1	0.0123328	5.61392e-05	0.667384	0.00617857	0.488375
RPUSD1	0.0125484	5.7042e-05	0.666928	0.0227614	0.414507
C2orf68	0.0121424	5.71819e-05	0.666858	0.00241938	0.533096
HKDC1	0.012078	5.75605e-05	0.666669	0.000605294	0.589675
FCHO1	0.0125882	5.76591e-05	0.66662	0.00332183	0.518634
PIGU	0.012331	5.77946e-05	0.666552	0.00217731	0.537768
LIMK1	0.0120401	5.78442e-05	0.666528	2.69098e-06	0.742018
LCN12	0.0120305	5.79384e-05	0.666481	0.00808778	0.474358
LCN2	0.0121533	5.83203e-05	0.666293	0.00135443	0.558015
RECQL4	0.0122988	5.85365e-05	0.666187	4.3252e-06	0.731783
COMMD5	0.0122421	5.90023e-05	0.665959	0.0373464	0.3818
OCIAD2	0.0123147	5.91177e-05	0.665903	0.00246804	0.532206
PPP1CA	0.0126554	5.98733e-05	0.665538	0.00864523	0.470798
NAGS	0.0119324	6.00722e-05	0.665442	7.71704e-05	0.658138
DNAH14	0.0119342	6.00868e-05	0.665436	1.21784e-05	0.707754
ZNF695	0.0121797	6.01186e-05	0.66542	0.000380145	0.606587
GTF2IRD1	0.0120441	6.07932e-05	0.665099	0.0123728	0.450996
SPATC1L	0.0124736	6.08013e-05	0.665095	9.40481e-06	0.713984
CHST10	0.012083	6.10058e-05	0.664998	0.0320365	0.392257
SPDEF	0.0122196	6.10378e-05	0.664983	0.00420005	0.507513
SLC29A2	0.012364	6.10624e-05	0.664972	0.00718531	0.480587
ARHGAP8	0.0123227	6.1128e-05	0.664941	0.000195515	0.629213
RCOR2	0.0122086	6.13725e-05	0.664826	0.000119076	0.645011
GOT2	0.0123338	6.18083e-05	0.664621	0.00211212	0.539103
HPN	0.0121544	6.18806e-05	0.664588	0.00510821	0.497942
SMCO4	0.0112917	6.21311e-05	0.664471	0.00889912	0.46924
B4GALNT4	0.0120756	6.23583e-05	0.664366	0.0332208	0.38981
C2orf82	0.0119517	6.25533e-05	0.664275	0.000996045	0.570475
ENO2	0.0120842	6.33386e-05	0.663915	0.000265794	0.618979
RIBC2	0.0119905	6.34424e-05	0.663867	0.000171676	0.633441
LAPTM4B	0.0121143	6.38487e-05	0.663682	0.0176183	0.430304
ATF6B	0.0120156	6.38996e-05	0.663659	0.0106434	0.45945
GLDC	0.0121507	6.48626e-05	0.663226	0.000357566	0.608744
SOX12	0.012077	6.49989e-05	0.663165	0.000731953	0.58249
PRSS8	0.0119482	6.55184e-05	0.662934	0.000494046	0.597174
SPOCK3	0.0119804	6.62746e-05	0.6626	0.00150371	0.553664
LHX1	0.0113539	6.67145e-05	0.662408	0.184711	0.248909
SALL4	0.0116577	6.70268e-05	0.662272	0.000158185	0.63607
PAFAH1B3	0.0121301	6.90832e-05	0.661391	0.000118224	0.645233
MYLPF	0.0116809	6.96959e-05	0.661133	0.000349035	0.609591
TMC4	0.0117912	7.01407e-05	0.660946	0.00146769	0.554678
CDK4	0.0123578	7.06086e-05	0.660752	0.082742	0.321949
SULT4A1	0.0120411	7.09249e-05	0.660621	0.00104733	0.568473
COL9A2	0.0116347	7.10127e-05	0.660585	1.33347e-05	0.705529
KIF1A	0.0120911	7.11063e-05	0.660546	0.00137645	0.557348
HMGN1	0.0122182	7.122e-05	0.660499	0.000355306	0.608967
SVOPL	0.0121696	7.16357e-05	0.660329	0.000437198	0.601601
KIF22	0.0122434	7.25847e-05	0.659943	0.00358391	0.515074
EHMT2	0.0120898	7.25876e-05	0.659941	0.00221055	0.537101
SUGCT	0.0116439	7.34801e-05	0.659582	0.0863937	0.318389
PEX11B	0.0120861	7.399e-05	0.659379	0.000436916	0.601624
SPA17	0.0120221	7.44323e-05	0.659203	0.026617	0.404494
SFN	0.0119915	7.49191e-05	0.659011	0.00740251	0.47903
NEFH	0.0118964	7.67235e-05	0.658309	0.0090843	0.468128
FBN3	0.0117314	7.68181e-05	0.658273	0.000127158	0.642968
HOMER2	0.0120682	7.69756e-05	0.658212	3.69793e-05	0.679052
MAZ	0.0123678	7.73715e-05	0.658061	0.00137645	0.557348
CCDC114	0.0115458	7.75934e-05	0.657976	2.96097e-05	0.68506
RIMS4	0.0118424	7.80214e-05	0.657813	2.57953e-06	0.742908
KRT81	0.0118948	7.8307e-05	0.657705	0.00472567	0.50178
KCNH2	0.0120797	7.88231e-05	0.657511	0.00158075	0.551563
PTK7	0.0119056	7.94584e-05	0.657273	2.74638e-05	0.687062
FAM187A	0.0117003	8.05631e-05	0.656863	0.0493285	0.361998
FXYD3	0.0120891	8.22989e-05	0.656229	0.000103784	0.649238
MYEOV	0.0115503	8.33507e-05	0.655851	0.000780554	0.58002
DPCD	0.0124527	8.38716e-05	0.655665	0.141686	0.27478
TMEM132A	0.0120113	8.39238e-05	0.655647	0.00900984	0.468573
ITGB6	0.011936	8.45784e-05	0.655415	0.000159087	0.635888
IER5L	0.0120233	8.49517e-05	0.655283	0.0119904	0.452776
C12orf56	0.0120562	8.5365e-05	0.655138	0.000182924	0.631385
TMEM258	0.0116366	8.5429e-05	0.655116	0.0237416	0.411837
CASKIN1	0.0118134	8.56987e-05	0.655022	0.00249268	0.531761
SPRN	0.0114547	8.63688e-05	0.654789	9.10756e-06	0.714747
RBM38	0.0118971	8.6468e-05	0.654755	0.000775621	0.580265
PRPF6	0.012546	8.70139e-05	0.654566	0.177011	0.253198
BST2	0.0121819	8.72099e-05	0.654499	0.00414252	0.508177
C9orf142	0.0119012	8.72996e-05	0.654468	0.0321427	0.392035
HYDIN	0.0114044	8.76148e-05	0.65436	1.21784e-05	0.707754
TMEM25	0.0116274	8.76365e-05	0.654353	0.050387	0.360441
CLN3	0.0123559	8.77351e-05	0.654319	0.0685261	0.337079
ITGA3	0.011839	8.80904e-05	0.654198	0.00458282	0.503282
TTC22	0.0121125	8.85117e-05	0.654055	0.000606357	0.58961
DOK5	0.0117262	8.89884e-05	0.653893	0.000156889	0.636333
C11orf49	0.0121	8.9848e-05	0.653605	0.00216633	0.537991
EDN2	0.0122017	8.99114e-05	0.653584	0.00258964	0.530046
PLEK2	0.0121329	9.04542e-05	0.653403	0.000131595	0.641896
CLDN3	0.0118079	9.17426e-05	0.652977	0.000153237	0.637085
EFNA2	0.0119715	9.18827e-05	0.652931	0.157679	0.264582
TSTA3	0.0123693	9.20364e-05	0.652881	0.0536708	0.355768
RNF8	0.0120674	9.20954e-05	0.652861	0.00558452	0.493492
ATP6AP1	0.0119919	9.24053e-05	0.65276	0.00280539	0.526421
YDJC	0.0120911	9.29377e-05	0.652587	0.00232455	0.534876
BSCL2	0.0119539	9.36087e-05	0.65237	0.00515423	0.497497
CBX8	0.0121165	9.41588e-05	0.652193	0.00177371	0.546668
KIF12	0.0119461	9.46244e-05	0.652044	0.00024519	0.621703
RNF121	0.0124963	9.49959e-05	0.651926	0.0816255	0.323062
LRRC61	0.0122923	9.51091e-05	0.65189	0.0538313	0.355546
ZNF710	0.011921	9.52098e-05	0.651858	0.000639606	0.587607
SPTBN2	0.0114998	9.62219e-05	0.651538	0.0027781	0.526866
ZNF560	0.0114332	9.662e-05	0.651413	0.0294545	0.397858
VAMP8	0.0122779	9.69088e-05	0.651322	0.000126996	0.643008
SCD5	0.0120986	9.69939e-05	0.651296	0.000161313	0.635443
MBOAT2	0.0115753	9.83406e-05	0.650877	0.000702683	0.584047
GYLTL1B	0.0118326	0.000100105	0.650337	0.00165736	0.549561
MRPL48	0.0120035	0.000101942	0.649784	0.026435	0.404939
MAPK15	0.0114758	0.000103753	0.649247	0.0152876	0.438758
NUPR1L	0.0116324	0.000103852	0.649218	0.000157969	0.636114
RPS21	0.0119024	0.000104388	0.649061	0.0311968	0.394037
ENTPD8	0.0116405	0.000105499	0.648737	0.000512481	0.595835
SYNGR3	0.0116788	0.000106516	0.648443	0.000651039	0.58694
SLC39A7	0.0121923	0.000107889	0.648051	0.043886	0.370453
VOPP1	0.0121978	0.000108011	0.648017	0.00136174	0.557793
C1orf233	0.0119472	0.000108527	0.64787	0.000127904	0.642786
TMEM63C	0.0125025	0.000109484	0.647601	7.64019e-06	0.718879
LEPREL4	0.0120045	0.000109687	0.647544	0.000445096	0.600957
ERGIC3	0.0118445	0.000109978	0.647463	0.0586523	0.349093
RPS2	0.0120287	0.000110672	0.64727	0.152367	0.267883
MANF	0.0120214	0.000111939	0.646919	0.0395584	0.377795
SMG9	0.0120052	0.000113142	0.64659	0.00575993	0.491935
CCDC74A	0.0117281	0.0001145	0.646222	0.000177685	0.632328
RTN4R	0.0120118	0.000114868	0.646123	3.66795e-05	0.679275
PAQR4	0.012146	0.000114999	0.646088	8.13336e-05	0.65658
GIPC1	0.0123968	0.000115609	0.645925	0.350989	0.176438
KCNN4	0.0116426	0.000116606	0.645659	0.00093635	0.572922
TMEM45B	0.0122473	0.000117775	0.645351	6.03051e-05	0.665331
TMEM177	0.0117202	0.000118734	0.6451	0.0108586	0.458338
ERVMER34.1	0.0117338	0.00011937	0.644934	0.00206961	0.539993
CACFD1	0.0123134	0.000119605	0.644873	0.00368667	0.513739
NABP2	0.0121184	0.000120311	0.644691	0.0221265	0.416287
ELMO3	0.0120301	0.000120955	0.644525	0.0396843	0.377573
NGEF	0.0115053	0.000121976	0.644264	2.98572e-05	0.684837
MAGED1	0.0119858	0.000122629	0.644098	0.00143671	0.555568
RFXANK	0.0124145	0.000123227	0.643947	0.0369876	0.382467
ALG1L	0.0112618	0.000123451	0.64389	0.0346658	0.386917
GRAMD2	0.011655	0.000123516	0.643874	0.000209205	0.626989
ALG3	0.0119381	0.000123599	0.643853	0.0352349	0.385805
TNNI3	0.011731	0.00012484	0.643542	0.0117216	0.454055
YIPF2	0.011944	0.000125281	0.643432	0.000344195	0.610079
CCNA1	0.0119281	0.000125359	0.643413	0.000348602	0.609634
TMEM184A	0.0115545	0.00012704	0.642997	0.000369056	0.607632
FUT3	0.0120124	0.000127331	0.642926	0.00653123	0.485532
DCHS2	0.011438	0.000127491	0.642887	0.000869855	0.575815
FAM86C1	0.0116362	0.000127846	0.6428	0.00815576	0.473913
CLDN7	0.0116623	0.000130004	0.642276	0.00145989	0.5549
CALML5	0.0117942	0.000130298	0.642206	0.00476809	0.501342
ZNF572	0.0119074	0.000130664	0.642118	0.000554309	0.592947
HIST1H2AE	0.0115955	0.000130742	0.642099	2.58923e-05	0.688619
CTCFL	0.0115732	0.000130885	0.642065	0.000797571	0.579188
HYOU1	0.0118817	0.000132061	0.641785	0.0339927	0.388252
ATAT1	0.0114745	0.000134412	0.641231	0.0223629	0.415619
TMEM141	0.0118906	0.000134845	0.64113	0.134443	0.279675
2012-09-02	0.0116761	0.000135983	0.640866	0.000113223	0.646568
ASPSCR1	0.0121243	0.00013709	0.640611	0.233475	0.224274
KLC3	0.0115129	0.000137628	0.640488	0.0066811	0.484363
ZNF93	0.0116836	0.000137763	0.640457	3.36881e-07	0.781844
ACP6	0.0115565	0.000137873	0.640432	0.00522391	0.496829
HIST1H2BD	0.0115643	0.000137915	0.640422	0.000106849	0.648348
KIAA1217	0.0114825	0.000138003	0.640402	0.00388164	0.511292
SAPCD2	0.0116169	0.000138166	0.640365	0.00021062	0.626766
CHTF18	0.0117496	0.000139897	0.639972	5.59459e-05	0.667482
PPIH	0.0122071	0.000139998	0.63995	0.029571	0.397597
MTL5	0.0116803	0.00014005	0.639938	0.00153953	0.552675
PAK6	0.0117626	0.000141828	0.63954	0.000715099	0.58338
CLDN4	0.0115064	0.000142758	0.639333	0.0014063	0.556458
TRAIP	0.0120446	0.000143026	0.639274	3.35223e-05	0.681722
NPAS2	0.0116183	0.000143596	0.639148	0.00718531	0.480587
SAMD1	0.0122671	0.000144052	0.639048	0.021583	0.417844
ZBED2	0.0116434	0.000144182	0.639019	0.0011193	0.565803
KDM4D	0.0116985	0.000149939	0.637777	0.00501724	0.498832
SH3YL1	0.0121369	0.000150735	0.637609	0.00746558	0.478585
C6orf15	0.0118646	0.000151851	0.637374	0.000592422	0.590478
PODXL2	0.0111445	0.000152099	0.637322	0.000456212	0.600067
SOX9	0.0117553	0.000152203	0.6373	0.0253643	0.407609
TMEM130	0.011015	0.000152297	0.637281	3.13815e-05	0.683502
LMO7	0.0112652	0.00015253	0.637232	1.51197e-05	0.702414
PRSS3	0.0117907	0.000156249	0.636464	1.83645e-05	0.697515
SPOCK2	0.0116953	0.000157923	0.636123	0.000434219	0.601847
EPHX4	0.0120722	0.000159146	0.635877	8.01267e-06	0.717766
BANF1	0.011816	0.000161491	0.635408	0.0774877	0.327289
WFDC2	0.011747	0.00016268	0.635173	0.00152331	0.55312
RAB3B	0.0112197	0.00016375	0.634962	0.000561013	0.592502
ACSM3	0.0113939	0.000164804	0.634756	0.00027825	0.617421
UBXN10	0.011018	0.000164966	0.634725	1.58076e-05	0.701302
KLK14	0.0116566	0.000166317	0.634463	0.0123291	0.451196
LSR	0.0117807	0.0001686	0.634024	0.0104738	0.46034
PSRC1	0.01183	0.000169297	0.633891	8.13336e-05	0.65658
TIGD1	0.0114401	0.000169992	0.633759	0.000169324	0.633886
PACSIN1	0.0118206	0.000170046	0.633749	4.92707e-06	0.728891
CACNG4	0.0117435	0.000170256	0.633709	0.00875328	0.47013
AHCY	0.0119105	0.000171462	0.633481	0.0393076	0.37824
KIAA1210	0.0115584	0.000171725	0.633432	5.92258e-05	0.665851
EHF	0.0113877	0.000172421	0.633301	0.000140249	0.639893
PNMA6C	0.0121232	0.000173145	0.633166	0.000715099	0.58338
MPPED2	0.0118774	0.000175579	0.632714	0.0236586	0.412059
NFE2L3	0.0113897	0.000175827	0.632669	8.31783e-05	0.655913
AP2M1	0.0119435	0.000180136	0.631884	0.0257172	0.406719
GPR143	0.0119978	0.000180815	0.631762	0.000234437	0.623206
KDM1A	0.0115462	0.000183047	0.631364	0.0126169	0.449883
BCAM	0.0117391	0.000183862	0.631219	0.0458324	0.367338
HAGHL	0.0116228	0.000185062	0.631007	0.000146295	0.638558
FOXP3	0.011463	0.000186062	0.630832	3.7892e-05	0.678385
CDC42BPG	0.0112609	0.000186318	0.630787	0.00224423	0.536433
DEPDC7	0.0115684	0.000187579	0.630568	8.19444e-05	0.656358
TFPT	0.0123135	0.000188488	0.63041	0.150606	0.268995
PSMG3	0.0114077	0.00019125	0.629935	0.00850291	0.471688
CDT1	0.0116515	0.00019173	0.629853	6.36291e-06	0.723106
RASL11B	0.0111712	0.000191737	0.629852	5.77117e-06	0.725331
LCMT1	0.0119512	0.000191867	0.62983	0.088265	0.316609
RFC4	0.0118194	0.000191903	0.629824	0.0285904	0.399822
WDR72	0.0113562	0.000192543	0.629715	0.00361788	0.514629
LRRC8D	0.0111056	0.000193987	0.62947	0.000357566	0.608744
DAPL1	0.0114223	0.000194071	0.629456	0.00418099	0.507732
FZD10	0.0112777	0.000195137	0.629277	0.0268	0.404049
SURF2	0.0119949	0.000195916	0.629146	0.118406	0.291245
RITA1	0.0120117	0.000198434	0.628728	0.007216	0.480365
XYLT2	0.0115804	0.000198516	0.628714	0.000850245	0.576705
BCAS4	0.0115387	0.000199367	0.628574	5.77139e-05	0.666593
ST6GAL1	0.0114963	0.000199777	0.628506	5.77139e-05	0.666593
FADD	0.0117394	0.000200681	0.628358	0.0267084	0.404272
CYHR1	0.0116815	0.000200903	0.628322	0.620822	0.094115
SPATA33	0.0116856	0.000201808	0.628174	0.240203	0.221159
GGT6	0.0115693	0.000201939	0.628153	0.000191156	0.629951
TLL2	0.0111883	0.000202157	0.628117	7.95254e-05	0.657248
C1orf74	0.0118772	0.000202211	0.628109	0.000564392	0.592279
BACE2	0.0116609	0.000202266	0.6281	0.00131841	0.559128
MGME1	0.0115861	0.000204637	0.627716	0.00946442	0.465903
MOGS	0.0116613	0.000206786	0.627372	0.0100597	0.462565
CREB3L4	0.0115566	0.00020746	0.627265	0.0381945	0.380243
SLC4A11	0.0109371	0.000207533	0.627253	0.000860001	0.57626
ALDH18A1	0.0121006	0.000208324	0.627128	0.0130159	0.448103
NOTUM	0.0114882	0.000208596	0.627085	0.00038055	0.606549
TMED9	0.0119687	0.000210894	0.626723	0.200448	0.240516
NOXA1	0.0115225	0.0002124	0.626488	0.00391802	0.510847
CRB3	0.0112929	0.000212664	0.626447	0.000898548	0.574544
FGFR2	0.0118611	0.000213649	0.626294	0.00460375	0.503059
FUT2	0.0118849	0.000215472	0.626013	0.0332208	0.38981
FAM69B	0.0118477	0.000215483	0.626011	0.0229224	0.414062
TRPV4	0.0113536	0.000215712	0.625976	0.000118224	0.645233
ABHD17C	0.011889	0.000216327	0.625882	0.0152299	0.438981
SUSD2	0.0107834	0.000217232	0.625743	0.00130424	0.559573
SERPINA5	0.0110326	0.000217448	0.62571	0.00102999	0.56914
TEKT2	0.0108715	0.000218123	0.625608	0.0196596	0.423629
FKBP10	0.0114043	0.000219139	0.625454	9.86069e-05	0.650795
DBNDD1	0.0116371	0.000220301	0.625278	0.0456912	0.36756
LDB1	0.0118422	0.000221107	0.625157	0.00106494	0.567805
INTS4	0.01199	0.000222104	0.625007	0.04416	0.370008
C16orf93	0.0112322	0.000222814	0.624901	0.00802029	0.474803
PYCRL	0.0115434	0.000224906	0.624591	0.135415	0.279008
ANO7	0.011613	0.000225022	0.624573	0.0105583	0.459895
PRRT3	0.011822	0.000226045	0.624422	0.000165848	0.634553
ARMCX6	0.0117976	0.000226978	0.624285	0.00709389	0.481255
TBC1D7	0.0115876	0.000227204	0.624252	0.0124699	0.450551
DPM2	0.0118047	0.000227859	0.624156	0.205643	0.237846
EXPH5	0.0116851	0.000229042	0.623983	0.000445096	0.600957
BCL9	0.0112498	0.000229459	0.623923	0.00022524	0.624541
UBL4A	0.0118407	0.000230718	0.62374	0.163243	0.261208
SLC34A2	0.0113937	0.000232309	0.623511	0.00218834	0.537546
HOXB2	0.0111827	0.00023675	0.622878	0.0101414	0.46212
COL13A1	0.0109691	0.000236786	0.622873	0.000155799	0.636556
SNRPC	0.011352	0.000237072	0.622832	0.0317195	0.392925
FAM203A	0.0119533	0.000240413	0.622363	0.321531	0.18734
CCDC8	0.0113968	0.000240525	0.622348	1.82017e-05	0.697742
CAPN9	0.0112367	0.000241008	0.62228	0.00229689	0.535407
AOC1	0.0114716	0.000241115	0.622266	4.28397e-07	0.777617
LAMC2	0.011238	0.000242054	0.622135	0.00452052	0.503949
NXN	0.0113951	0.00024416	0.621844	0.00379194	0.512404
DRP2	0.0111326	0.000246922	0.621466	1.39492e-05	0.704417
CILP2	0.0109201	0.000247456	0.621394	3.49259e-05	0.68061
C20orf96	0.0108352	0.000247834	0.621342	8.13336e-05	0.65658
GPR27	0.010922	0.000247906	0.621332	0.000674445	0.585605
POLR2G	0.0116877	0.000248286	0.621281	0.0341042	0.38803
PAEP	0.0117382	0.000250606	0.620968	0.251891	0.215883
TMEM9	0.0116922	0.000250885	0.62093	0.0276363	0.402047
RNASEH2A	0.0120189	0.000251209	0.620887	0.000209205	0.626989
GSTP1	0.011835	0.000251276	0.620878	0.205206	0.238069
CP	0.0111472	0.000251372	0.620865	0.00433795	0.505952
FRMD5	0.0114833	0.000253263	0.620612	6.73247e-05	0.662143
MMP1	0.0118288	0.000253847	0.620534	0.0493013	0.362038
RTP4	0.0112073	0.000256883	0.620133	0.000194191	0.629436
LRRC56	0.0115266	0.000259469	0.619795	0.00685492	0.483035
CD9	0.0111287	0.000260577	0.61965	3.55019e-05	0.680165
SLC35B2	0.0114607	0.000261162	0.619574	0.04416	0.370008
CES3	0.0115838	0.000261189	0.619571	0.0671778	0.338636
GOLT1A	0.0116151	0.000262471	0.619405	0.0196424	0.423683
PIANP	0.0107487	0.000263427	0.619282	7.21387e-06	0.720214
ITGA11	0.0110123	0.000264576	0.619135	0.00615167	0.488597
CCDC103	0.0110944	0.000266116	0.618938	0.029571	0.397597
MYT1	0.011075	0.000266282	0.618916	0.00388229	0.511284
APEX2	0.0119964	0.000266388	0.618903	0.0772745	0.327511
THBS2	0.0109545	0.00026837	0.618651	0.00335366	0.518189
METTL7B	0.0112779	0.000269038	0.618567	0.000963084	0.57181
ADM2	0.0113041	0.000269244	0.618541	0.000879808	0.57537
GMPR	0.010871	0.000270414	0.618394	0.0166034	0.433864
MATN3	0.0109725	0.00027064	0.618365	0.00588808	0.490822
ZSCAN16	0.0107685	0.000272993	0.618071	0.00103574	0.568918
SLC30A2	0.0116415	0.000274243	0.617915	0.000574636	0.591612
ASPHD2	0.0112133	0.000275121	0.617807	0.000410599	0.603849
TRMT12	0.0112493	0.000275652	0.617741	0.0298705	0.39693
TUBB4A	0.0113061	0.000276903	0.617587	0.00360086	0.514851
HMGN2	0.0117456	0.000278222	0.617425	0.00327457	0.519301
CETN2	0.0115139	0.000279278	0.617296	0.733039	-0.0649683
CHMP4C	0.0113573	0.000280444	0.617153	0.00249268	0.531761
KCNG1	0.010915	0.00028073	0.617119	0.00586226	0.491045
UBAC2	0.0114576	0.000280899	0.617098	0.0167276	0.433419
ARL4C	0.0114592	0.000282019	0.616962	0.00032289	0.612304
PALM3	0.0115971	0.000282314	0.616926	0.000108179	0.647969
ETV5	0.011029	0.000282756	0.616873	0.0938172	0.311492
TSEN54	0.0113704	0.000283814	0.616745	0.0252767	0.407832
SFRP5	0.0105822	0.00028503	0.616599	0.017314	0.431353
ZSWIM4	0.0112855	0.000287545	0.616299	0.072697	0.332406
B3GAT3	0.0115812	0.000289399	0.616079	0.0424035	0.3729
VCAN	0.0108151	0.00029087	0.615905	0.000302758	0.614529
P2RY2	0.0111807	0.000292561	0.615706	0.0133736	0.446546
TP73	0.0114399	0.000293349	0.615614	0.00044979	0.600579
CAPSL	0.0105303	0.000294676	0.615459	0.000428333	0.602337
SKAP1	0.0109615	0.000297716	0.615107	1.60905e-05	0.700857
KLHDC8A	0.011055	0.000298401	0.615028	4.55871e-05	0.673267
TFAP4	0.0115333	0.000302603	0.614546	0.0233291	0.412949
NPW	0.011515	0.000304812	0.614296	0.405104	0.157748
LIPH	0.0114137	0.000305597	0.614207	0.00259339	0.529981
PDIA4	0.0114899	0.000305837	0.61418	0.000428869	0.602292
PSD4	0.0115543	0.000306494	0.614106	4.70597e-05	0.672377
C1QTNF6	0.0110511	0.00031091	0.613613	0.000293115	0.615641
CYP24A1	0.011742	0.000313494	0.613327	0.0143751	0.442363
TOP1MT	0.0120019	0.00031447	0.613219	0.372987	0.168651
RMI2	0.0115384	0.000315328	0.613125	0.000884821	0.575147
SDHAF1	0.0112673	0.000315462	0.61311	0.0109895	0.45767
IGFBP2	0.0115061	0.000317383	0.6129	0.000431537	0.602069
FUOM	0.0118944	0.00032011	0.612604	0.0142766	0.442763
NMRAL1	0.0115722	0.000320549	0.612556	0.0911297	0.313939
ASF1B	0.0115924	0.00032149	0.612455	4.45787e-06	0.731116
DNAL4	0.011606	0.000321902	0.61241	0.0524005	0.357548
TMPRSS2	0.0109629	0.000322386	0.612358	0.00780834	0.476221
LPAR3	0.0109594	0.000324178	0.612166	0.0011167	0.565896
LRRC45	0.0116449	0.000326241	0.611946	0.0745436	0.330404
HMGA1	0.0111839	0.000327041	0.61186	0.00822421	0.473468
GDNF	0.0108441	0.000328588	0.611696	0.00694372	0.482367
MUC1	0.01154	0.000329203	0.611631	0.00588808	0.490822
RCC2	0.0112828	0.000331068	0.611435	0.00241938	0.533096
RAI14	0.011075	0.000333087	0.611223	0.000143243	0.639226
OXGR1	0.010872	0.000333947	0.611134	0.00499471	0.499054
AP1M2	0.0114784	0.000334976	0.611026	0.00546203	0.494605
PRAF2	0.0113198	0.000335116	0.611012	0.00468829	0.502169
PPP1R16A	0.0116403	0.000335379	0.610985	0.254042	0.214929
ABHD11	0.011476	0.000336259	0.610893	0.000378482	0.606742
RPL8	0.0117183	0.000338419	0.61067	0.478205	0.134609
E2F5	0.0112096	0.000338427	0.610669	0.010019	0.462788
AEBP1	0.0106388	0.000341291	0.610375	0.00768992	0.477027
HS6ST1	0.011459	0.000341401	0.610364	0.00303217	0.522861
TRIM46	0.0110109	0.000343893	0.61011	0.0159342	0.436311
CTXN1	0.011134	0.000345515	0.609945	0.0148876	0.440316
DYRK2	0.0108911	0.000348063	0.609688	0.00018388	0.631216
PTTG1IP	0.0114541	0.000348222	0.609672	0.0331117	0.390032
BICD1	0.0107671	0.000350229	0.609471	5.65896e-06	0.725776
FXYD7	0.0104131	0.000351427	0.609351	0.0409612	0.375348
CEP72	0.011158	0.000351477	0.609346	0.000373743	0.607187
NRAP	0.0105248	0.000351574	0.609337	0.0644649	0.341845
CORIN	0.0106464	0.000352731	0.609222	0.00650928	0.485705
RPN2	0.0116235	0.000352812	0.609214	0.0679457	0.337746
BAIAP2	0.0110347	0.000353964	0.609099	0.00759308	0.477695
FAM155B	0.0112538	0.000356498	0.608849	0.0353496	0.385582
CHN1	0.0108722	0.000356552	0.608844	0.000195515	0.629213
LRRC73	0.0104783	0.000362306	0.608281	0.0619902	0.344866
LAGE3	0.011913	0.000363113	0.608203	0.149208	0.269885
RPL18A	0.011103	0.000363322	0.608183	0.141351	0.275003
OCA2	0.0105383	0.000365838	0.60794	0.00075351	0.581377
LY6E	0.0114223	0.000366026	0.607922	0.00609816	0.489042
CELSR1	0.0107664	0.000368061	0.607727	1.35427e-06	0.756035
CAPN5	0.0114671	0.000368076	0.607725	0.000525002	0.594949
FAM71E1	0.0116001	0.000370433	0.6075	0.0233291	0.412949
RPGRIP1L	0.0111752	0.000374147	0.607148	0.00656584	0.48526
GNB1L	0.0110935	0.000376083	0.606966	0.00601864	0.48971
PKMYT1	0.0114142	0.000378351	0.606754	0.000199536	0.628546
RANBP17	0.0113053	0.000382142	0.606401	2.00318e-05	0.695294
ST5	0.0107544	0.000384254	0.606206	5.17801e-06	0.727778
MAN1B1	0.0114141	0.000386703	0.605981	0.0789929	0.325731
SLC50A1	0.0114793	0.000387253	0.605931	0.0363957	0.38358
CCDC74B	0.0112429	0.000388411	0.605825	0.023992	0.411169
ATPIF1	0.0116529	0.000389435	0.605732	0.000500106	0.596729
TRAF7	0.0116194	0.000389985	0.605682	0.119883	0.290132
BAK1	0.0113355	0.000390126	0.605669	0.00408539	0.508844
NDP	0.011307	0.000390159	0.605666	0.00186797	0.544443
ZNF691	0.0112391	0.000393122	0.605397	0.0244993	0.409834
ZMYND10	0.0109464	0.000394787	0.605247	0.0363957	0.38358
TCEA2	0.0113169	0.00039489	0.605238	0.114628	0.294137
BCL11A	0.0109206	0.000396834	0.605064	2.48198e-05	0.689732
PLCD3	0.011334	0.000397097	0.60504	0.0304768	0.395595
SLC2A9	0.0108842	0.000397358	0.605017	1.69229e-06	0.751585
LBH	0.0104801	0.000400822	0.604708	0.00251753	0.531316
TJP3	0.0112167	0.000407531	0.604117	0.000320825	0.612526
NALCN	0.00994524	0.000407728	0.604099	3.52128e-05	0.680387
PUF60	0.0115371	0.000407881	0.604086	0.191993	0.244966
LRRTM1	0.0113922	0.000412342	0.603698	0.0213535	0.418512
SHROOM2	0.0113879	0.000415252	0.603447	0.00709389	0.481255
CALR	0.011515	0.00041659	0.603332	0.0101005	0.462343
ELF3	0.0109914	0.000425582	0.602568	0.00133992	0.55846
PNKD	0.0114874	0.000426816	0.602464	0.0041234	0.508399
FAP	0.0106403	0.000428724	0.602304	0.000149404	0.637891
MKS1	0.0113431	0.000428971	0.602283	0.189505	0.246301
PRIM2	0.0108195	0.00042997	0.6022	0.000255513	0.620314
KIF5A	0.0111159	0.000432288	0.602007	4.66876e-05	0.6726
SWI5	0.0111244	0.000438354	0.601506	0.300893	0.19535
ZSCAN9	0.0101963	0.000438759	0.601473	0.00102999	0.56914
TBCB	0.0111121	0.000440734	0.601311	0.0296706	0.397375
RABL5	0.0110388	0.000442242	0.601188	0.0664168	0.339526
DCAF15	0.0107473	0.000444016	0.601044	0.000344195	0.610079
FAM171A2	0.0107063	0.000444128	0.601035	0.00191671	0.543331
KCNK9	0.0108992	0.000449399	0.60061	0.0193115	0.424725
UPK2	0.0103754	0.000450249	0.600542	0.00139611	0.55676
RAB15	0.0112609	0.000452251	0.600382	7.54452e-05	0.658805
CGREF1	0.011177	0.000452508	0.600361	0.140349	0.27567
MND1	0.0111521	0.000454151	0.60023	0.000182626	0.631438
NIPSNAP1	0.0111473	0.000459018	0.599845	0.00137645	0.557348
ZNF579	0.0114961	0.000460964	0.599692	0.34424	0.178885
DNAJC9	0.0113448	0.000462914	0.599539	0.000310674	0.613639
C7orf49	0.0112697	0.000464456	0.599419	0.0223629	0.415619
TTC39A	0.0115176	0.000466302	0.599275	0.0014063	0.556458
PATZ1	0.0112648	0.000466877	0.599231	0.054477	0.354656
HID1	0.0111028	0.000468098	0.599136	0.0152876	0.438758
MARCKSL1	0.0111843	0.000469354	0.599039	0.00325894	0.519524
TRIT1	0.0108957	0.000473086	0.598752	0.0104317	0.460563
SEMA7A	0.0111548	0.000475268	0.598585	0.00805397	0.47458
TNFSF4	0.0110054	0.00047835	0.59835	0.0114354	0.455446
DDOST	0.011454	0.000478774	0.598318	0.0178141	0.429636
PKIB	0.0110359	0.000480957	0.598152	0.000624636	0.588497
SYTL1	0.0110685	0.00048116	0.598137	0.000364422	0.608077
SRD5A1	0.0115765	0.000481822	0.598087	1.04181e-05	0.711536
VPS37D	0.0112103	0.000488996	0.597549	0.00263205	0.529314
CENPM	0.0113432	0.000491295	0.597378	0.00116964	0.564023
CNNM4	0.0109151	0.000492283	0.597305	0.000308678	0.613861
EDAR	0.0109754	0.000492729	0.597272	0.0207984	0.42015
CAMSAP3	0.0109185	0.000492997	0.597252	0.00130424	0.559573
FNDC1	0.0107902	0.000494068	0.597173	0.0063697	0.486817
WDR91	0.0108422	0.000499323	0.596787	2.41955e-05	0.690399
SLC39A11	0.0109936	0.000505632	0.596328	2.35854e-05	0.691067
HES2	0.0108317	0.000507336	0.596205	1.60129e-06	0.752698
OBP2A	0.0112103	0.000507576	0.596187	0.0214296	0.418289
CACNA1E	0.0102833	0.000509425	0.596054	0.000690457	0.584715
ITGB5	0.0105715	0.000510839	0.595953	0.0380724	0.380465
CYP4F11	0.0109571	0.00051088	0.59595	0.00276454	0.527089
NUDT1	0.0113357	0.000512172	0.595857	0.00665145	0.484592
MMP3	0.0102578	0.000512338	0.595845	1.59667e-05	0.70105
HAPLN4	0.0106522	0.000514453	0.595694	0.007294	0.479803
EVPL	0.0107111	0.00052233	0.595137	0.00293108	0.524419
VPS28	0.010509	0.000523767	0.595036	0.438727	0.146846
MCM5	0.0109701	0.00052479	0.594964	0.000240751	0.622316
FANCF	0.0112155	0.000525863	0.594889	0.000749154	0.5816
C15orf48	0.0111074	0.00052608	0.594874	0.000369056	0.607632
CPNE7	0.0112136	0.000527405	0.594782	0.000164704	0.634776
CDR2L	0.010753	0.000528623	0.594697	0.0306812	0.39515
ADCK5	0.0113526	0.000532102	0.594455	0.0198023	0.423184
C17orf70	0.0114704	0.000532504	0.594428	0.0328943	0.390477
POLG2	0.0114324	0.000532659	0.594417	0.125622	0.285905
TOMM34	0.0111249	0.00053608	0.594181	0.0191666	0.425186
KRT86	0.01109	0.000539541	0.593944	3.99911e-05	0.676903
VEPH1	0.0113366	0.000540186	0.5939	0.0245847	0.409612
TREX2	0.0107159	0.000556021	0.592833	0.00718531	0.480587
APOC2	0.0109826	0.000556233	0.592819	5.03758e-06	0.728395
GAPDH	0.0111606	0.000557684	0.592722	0.0286872	0.3996
SCG2	0.0103092	0.000558212	0.592687	5.33406e-06	0.727111
ANKRD65	0.0103142	0.000563387	0.592346	0.0168525	0.432974
RNFT2	0.0111815	0.00056398	0.592307	0.00435791	0.505729
HPDL	0.0110043	0.000564288	0.592286	0.0134254	0.446323
ENKUR	0.0105481	0.000564443	0.592276	0.0134254	0.446323
GMNC	0.0110055	0.000565999	0.592174	0.00122662	0.562087
PIP5KL1	0.0106518	0.000570826	0.591859	0.0195177	0.424074
CBX2	0.0108569	0.000572274	0.591765	0.000869855	0.575815
ST6GALNAC1	0.0109107	0.000576806	0.591472	0.0104317	0.460563
TEC	0.0108551	0.000581501	0.591171	8.76284e-05	0.654355
RPL35A	0.0109957	0.000585907	0.59089	0.166234	0.259428
AKR1A1	0.0110048	0.000588058	0.590753	0.00685492	0.483035
DGUOK	0.010681	0.000592659	0.590463	0.060391	0.346868
GPX7	0.0107372	0.000593173	0.59043	0.000850245	0.576705
COPZ1	0.011076	0.000594021	0.590377	0.178194	0.252531
KCNK13	0.0106392	0.000596185	0.590241	0.0019868	0.541773
FSCN2	0.0103828	0.000598433	0.590101	0.0288623	0.399199
TMEM238	0.0107642	0.00060282	0.589828	0.0124699	0.450551
NTHL1	0.0111106	0.000609703	0.589404	0.0662275	0.339749
SLC16A3	0.0109451	0.000609879	0.589393	0.0112552	0.456336
LGSN	0.0102619	0.000614146	0.589132	0.153672	0.267064
XDH	0.010593	0.000614242	0.589126	0.00272068	0.527815
STAP2	0.0111473	0.000615558	0.589046	0.059343	0.348203
C2orf81	0.0107455	0.000623133	0.588587	0.000662652	0.586272
SHISA2	0.0106598	0.000624572	0.588501	0.13869	0.276783
IQCC	0.0111464	0.000626085	0.58841	0.00586226	0.491045
IL20RA	0.0101993	0.00062675	0.58837	0.000418343	0.603182
TCTEX1D2	0.011248	0.000627488	0.588326	0.11607	0.293025
ANAPC15	0.0110124	0.00063631	0.587801	0.180577	0.251196
UGT8	0.0112626	0.000637636	0.587723	0.00366937	0.513962
SCNM1	0.011012	0.000637662	0.587722	0.0341042	0.38803
CD276	0.0105466	0.000637873	0.587709	0.00756104	0.477917
CHRNA1	0.0107568	0.000638051	0.587699	2.65062e-06	0.742336
TNFRSF19	0.010596	0.000640722	0.587541	5.59459e-05	0.667482
FAM110A	0.0111911	0.000642755	0.587422	0.00158075	0.551563
ADAM28	0.0104756	0.000643052	0.587405	2.18371e-05	0.693069
CCDC137	0.011321	0.00064702	0.587173	0.0768494	0.327956
CNPY2	0.010945	0.000648738	0.587073	0.0958092	0.309712
ACOT8	0.0112889	0.000649885	0.587007	0.0335499	0.389142
DDR1	0.0107384	0.000652423	0.58686	0.0524005	0.357548
TNNC1	0.0110923	0.000652581	0.58685	0.00363497	0.514407
RUNX2	0.0104052	0.000655474	0.586683	0.00050623	0.596284
SPATS2	0.0108535	0.000657929	0.586542	0.000554309	0.592947
HIST1H2BN	0.0100691	0.000658416	0.586514	0.00263205	0.529314
DRD2	0.010805	0.000661699	0.586326	0.00350016	0.516186
BIK	0.0106969	0.000665116	0.586132	0.00107681	0.56736
CDCA5	0.0109556	0.000666087	0.586077	2.48198e-05	0.689732
ATG9B	0.0112168	0.000666493	0.586054	0.00808778	0.474358
KRT16	0.0105435	0.00066731	0.586007	0.0114354	0.455446
HTR3A	0.0110441	0.000672149	0.585734	0.00124696	0.561415
STX6	0.010746	0.000672789	0.585698	0.00464586	0.502614
F12	0.0108374	0.00067477	0.585586	0.0291755	0.398487
EPPK1	0.0108652	0.000675173	0.585564	0.00380974	0.512182
ZNF668	0.0104597	0.000684242	0.585058	0.0906474	0.314384
ZNF774	0.0110467	0.000689452	0.58477	2.22156e-06	0.746023
DEFB1	0.0109018	0.000695737	0.584425	0.00363497	0.514407
CCDC148	0.0103181	0.000698044	0.584299	4.81918e-05	0.67171
GCAT	0.0106005	0.00069907	0.584243	0.0241602	0.410724
ZNF385C	0.010735	0.000701606	0.584106	0.00133272	0.558683
MAPK13	0.0106145	0.000703293	0.584014	0.00113795	0.565135
FBXL16	0.010341	0.00070396	0.583978	0.00253004	0.531094
ATXN7L3B	0.0107079	0.000705741	0.583882	0.00375657	0.512849
WNT7B	0.0111278	0.000708316	0.583743	0.0280148	0.401157
IQCD	0.0109225	0.000708347	0.583741	0.00267121	0.528646
PKN1	0.011381	0.000710463	0.583628	0.107615	0.2997
ANKLE1	0.0105473	0.000713247	0.583479	0.000260609	0.619646
RIBC1	0.0105603	0.000713508	0.583465	0.256061	0.214039
VWDE	0.0105992	0.000713843	0.583447	0.00803614	0.474698
FAM83H	0.0109281	0.000714327	0.583421	0.0499312	0.361108
SMPDL3B	0.010876	0.00071613	0.583325	0.0102236	0.461675
SLC6A11	0.0104838	0.000717921	0.583229	0.00404768	0.509289
POC1A	0.011471	0.000717926	0.583229	0.00183925	0.545111
MEIS1	0.0107016	0.00071937	0.583152	0.00445895	0.504617
GINS2	0.0111053	0.000722981	0.582961	0.000145272	0.638781
SV2A	0.0104325	0.000723351	0.582942	0.000339838	0.610524
CAPG	0.0108807	0.000725343	0.582837	4.97393e-05	0.67082
YIF1B	0.0111296	0.000725696	0.582818	0.0381945	0.380243
KSR2	0.0105497	0.000725744	0.582815	0.000241961	0.622148
DNTTIP1	0.0103976	0.000726388	0.582782	0.0107721	0.458783
TUBB	0.0109341	0.000729811	0.582602	0.0239083	0.411392
TIAM2	0.0103714	0.000733504	0.582409	0.00235973	0.534208
QPRT	0.0107245	0.000737475	0.582202	0.00653751	0.485482
INO80B	0.0109954	0.000738599	0.582144	0.772119	0.0551786
SCGB2A1	0.0108746	0.00073936	0.582104	0.00117068	0.563987
TMEM106C	0.0110425	0.000741235	0.582007	0.0162356	0.435199
CHPF2	0.0112659	0.000741819	0.581977	0.00993817	0.463233
COPG1	0.0109819	0.000742266	0.581954	0.0154035	0.438313
LYPLA2	0.0109522	0.000743741	0.581878	0.0583093	0.349538
DPAGT1	0.0110567	0.000745561	0.581784	0.460756	0.139949
FAM58A	0.0111955	0.000750001	0.581556	0.300332	0.195572
TBC1D2	0.0107018	0.00075368	0.581369	0.00142906	0.55579
AP1S1	0.0110566	0.000761068	0.580994	0.0508461	0.359773
PRR3	0.0104505	0.000764372	0.580827	0.0519303	0.358216
SDSL	0.0109418	0.000771611	0.580464	0.000554309	0.592947
PTK6	0.0107837	0.000776522	0.58022	0.0234934	0.412504
CORO1B	0.0108256	0.000779656	0.580065	0.00361788	0.514629
C15orf27	0.0104583	0.000780835	0.580006	5.21439e-05	0.669485
TMEM206	0.0108042	0.000782974	0.579901	5.01331e-05	0.670597
PRKCI	0.0105232	0.000788852	0.579612	0.0245847	0.409612
CCDC11	0.0106809	0.000792096	0.579454	0.00216633	0.537991
SMIM1	0.0101015	0.0007978	0.579176	0.0477008	0.364445
CAPS	0.0100392	0.000797896	0.579172	0.00370404	0.513517
C14orf1	0.0109347	0.000808183	0.578676	0.0708861	0.334409
STRA13	0.0113614	0.000809315	0.578622	0.563932	0.10969
ZWILCH	0.0108919	0.00081038	0.578571	3.82007e-05	0.678162
FOLR1	0.0107462	0.000817222	0.578245	0.00022675	0.624319
PLD4	0.0103708	0.000819544	0.578135	3.19049e-05	0.683057
AGTRAP	0.010962	0.000830942	0.577599	0.0766376	0.328179
PRKCZ	0.010997	0.000832368	0.577532	0.0277305	0.401824
DLEU1	0.0114889	0.000833184	0.577494	0.0509999	0.359551
PNCK	0.0102757	0.000836108	0.577358	0.0309897	0.394482
CHRNA3	0.010029	0.000837797	0.577279	0.0152186	0.439025
RAB39B	0.0108145	0.000838329	0.577254	0.000165848	0.634553
FAM83A	0.0107881	0.000844546	0.576967	0.0156965	0.437201
TM6SF2	0.0103555	0.00084751	0.57683	0.0013967	0.556742
PRR19	0.0110898	0.0008542	0.576524	0.0242446	0.410502
GPS1	0.0109216	0.00085532	0.576473	0.523275	0.121259
HHLA1	0.0100267	0.000859336	0.57629	0.0233291	0.412949
CASP2	0.0106553	0.000859945	0.576262	0.000780111	0.580042
IQCA1	0.010651	0.000865006	0.576033	0.0466874	0.366003
AMY1B	0.0113946	0.000867716	0.575911	1.78716e-05	0.698207
PDRG1	0.0111025	0.000868205	0.575889	0.0289794	0.398932
TMEM102	0.0107639	0.000869222	0.575843	9.36615e-05	0.652353
COPS7B	0.0110244	0.000871086	0.57576	0.0632567	0.343308
PGM2L1	0.00978412	0.000871589	0.575737	0.000293115	0.615641
SPSB2	0.0110417	0.000882835	0.575235	0.000698587	0.58427
TIGD5	0.0104177	0.00088594	0.575098	0.0605671	0.346646
SLC7A3	0.0105582	0.000888057	0.575004	0.00171021	0.548226
P4HB	0.0112403	0.000890132	0.574913	0.250035	0.216709
FBXL19	0.0110874	0.000892592	0.574805	0.00421977	0.507287
FANCB	0.0110328	0.000897025	0.57461	0.00402893	0.509512
TMEM51	0.0106373	0.000900066	0.574478	0.000494046	0.597174
ARFGAP1	0.0109897	0.000900357	0.574465	0.0176834	0.430081
CYBA	0.0108871	0.000909475	0.574069	0.00267121	0.528646
PUSL1	0.0108617	0.000909575	0.574065	0.141351	0.275003
PDIA6	0.0109019	0.000911097	0.573999	0.0422707	0.373123
CDK18	0.0108382	0.000914708	0.573844	0.00102426	0.569363
FBXO16	0.0110897	0.000916379	0.573772	0.000584012	0.59101
COL7A1	0.0100539	0.000917027	0.573744	0.00206961	0.539993
C15orf52	0.0109229	0.000922548	0.573508	0.00221055	0.537101
SLC9A7	0.0103018	0.000922759	0.573499	1.62336e-05	0.700634
OSBPL7	0.0104691	0.000924091	0.573442	7.10117e-05	0.660585
KLHL35	0.0105218	0.000931314	0.573135	0.00100163	0.570253
CSTF1	0.0109634	0.000938719	0.572823	0.0186839	0.426744
NEK6	0.0107639	0.000939477	0.572791	0.043886	0.370453
GTPBP3	0.0112421	0.000940457	0.57275	0.530982	0.119034
HIST1H2BG	0.0106599	0.000942926	0.572646	5.84654e-05	0.666222
LIG1	0.0105744	0.000944767	0.572569	3.24361e-05	0.682612
CDH2	0.0103329	0.000945873	0.572523	0.00210142	0.539326
PGLS	0.0102252	0.000951989	0.572268	0.217666	0.231839
NKAIN4	0.0106597	0.000953018	0.572226	0.0406215	0.375934
BHLHE41	0.00971902	0.000956034	0.572101	0.000840585	0.57715
LY6G6C	0.0105221	0.000962457	0.571836	0.00798672	0.475025
HSD17B14	0.0102377	0.000962676	0.571827	0.000831022	0.577595
DNMT3A	0.0104278	0.000962748	0.571824	0.000378482	0.606742
COL23A1	0.01008	0.000969654	0.571541	0.00258061	0.530204
ACBD7	0.0109828	0.000969702	0.571539	0.00279171	0.526644
PRR13	0.0108119	0.000971451	0.571467	0.148166	0.270553
MAGED2	0.0104982	0.000980809	0.571087	0.00510821	0.497942
DPP3	0.0109091	0.000982248	0.571029	0.0493285	0.361998
DSCC1	0.0107416	0.000984092	0.570955	0.00620557	0.488152
OTUB1	0.0107315	0.000991022	0.570676	0.0639895	0.342419
AGBL5	0.0105846	0.000993928	0.57056	0.0712855	0.333964
ARMC9	0.0108321	0.000994393	0.570541	0.00030472	0.614306
WISP1	0.00972387	0.00100797	0.570001	0.000302758	0.614529
PSTK	0.011139	0.00100884	0.569967	0.0209754	0.419624
ZNF212	0.0107703	0.00101423	0.569755	0.0125188	0.450328
CDK5	0.0111522	0.00101778	0.569616	0.0538313	0.355546
TSTD1	0.0102575	0.00101963	0.569543	0.100668	0.305484
IFT52	0.0101586	0.00102437	0.569358	0.00370404	0.513517
IGFL2	0.0107275	0.00102981	0.569147	0.198737	0.241406
TREX1	0.0102881	0.00103005	0.569138	0.00756104	0.477917
STMN1	0.0108055	0.00103762	0.568845	0.00017526	0.632773
FUK	0.0102829	0.00104292	0.568642	0.0693059	0.336189
RNF187	0.01102	0.0010437	0.568612	0.257074	0.213594
RAP1GAP	0.0104721	0.0010444	0.568585	0.0154618	0.438091
PSENEN	0.0102772	0.00104447	0.568582	0.164734	0.260318
C11orf82	0.0103842	0.00104497	0.568563	3.28226e-06	0.737791
SYT8	0.00977578	0.00104912	0.568404	0.00507423	0.498273
GPC2	0.0101394	0.00105391	0.568222	0.00588808	0.490822
C3orf67	0.0110055	0.00105414	0.568214	0.00391802	0.510847
RPN1	0.0106818	0.00105607	0.56814	0.0151151	0.439426
MCM4	0.0107419	0.0010569	0.568109	0.00165736	0.549561
NXNL2	0.0104997	0.00105844	0.56805	0.00435791	0.505729
EHD3	0.0101808	0.00106764	0.567703	0.00030472	0.614306
RNASET2	0.0104099	0.00106793	0.567693	0.00128323	0.56024
CDH11	0.0102005	0.00107169	0.567552	0.0052006	0.497052
AP3M2	0.011024	0.00107369	0.567477	0.0165416	0.434086
LRP8	0.0108536	0.00108322	0.567122	0.00348362	0.516409
CEP89	0.0104817	0.00108579	0.567027	0.000274639	0.617866
USP43	0.0104745	0.00108829	0.566934	0.0102236	0.461675
DRC1	0.00925105	0.00108956	0.566887	0.0144729	0.441968
TRIM11	0.0109198	0.00109158	0.566813	0.0733086	0.331739
GALNT5	0.0101755	0.00109528	0.566677	0.000157985	0.636111
PFDN6	0.0106543	0.00109656	0.56663	0.0781301	0.326621
JUP	0.010579	0.00110394	0.56636	0.065101	0.341084
RAD51	0.0106715	0.00110417	0.566351	4.55871e-05	0.673267
DDX41	0.0107755	0.00110599	0.566285	0.0766376	0.328179
ZFP92	0.0102902	0.00111225	0.566057	0.00158075	0.551563
CPSF3	0.0109196	0.00111806	0.565847	0.122577	0.28813
SPAG17	0.0102675	0.00112501	0.565597	0.000217821	0.625654
CARD14	0.0103177	0.0011282	0.565483	0.000574636	0.591612
SLC25A38	0.0105679	0.00112884	0.56546	0.167366	0.258761
KIF2C	0.0105175	0.00112982	0.565425	8.698e-05	0.654578
TRIM27	0.010404	0.00113325	0.565302	0.0133736	0.446546
DPYSL3	0.00998825	0.00113501	0.56524	0.00107086	0.567583
STON2	0.0103432	0.00113861	0.565112	0.0012902	0.560018
ZBTB42	0.010673	0.00114294	0.564958	0.00596612	0.490155
INA	0.0109145	0.00115669	0.564474	0.000415853	0.603395
KCNS1	0.0105664	0.00116088	0.564328	0.00458282	0.503282
LSM11	0.00989142	0.00116628	0.56414	0.000525002	0.594949
MCM3	0.0105971	0.00116791	0.564083	0.101714	0.304595
EPHB2	0.0103349	0.00116958	0.564025	0.00021062	0.626766
SMKR1	0.0105882	0.00117003	0.564009	0.052558	0.357326
SYNDIG1	0.0103262	0.00117199	0.563941	0.000515541	0.595617
TIGD7	0.0101645	0.00117241	0.563927	0.00156415	0.552008
KIAA1324	0.0103427	0.00117781	0.56374	0.0194471	0.424296
TCF3	0.0104499	0.00118009	0.563662	0.000599178	0.590055
BOP1	0.0110305	0.00118223	0.563588	0.14507	0.272555
DKK2	0.0100656	0.00118678	0.563432	4.59513e-05	0.673045
SLC10A3	0.0103102	0.00118937	0.563344	0.331573	0.183558
DERL3	0.0104989	0.00119164	0.563266	0.000749154	0.5816
DLG3	0.0107526	0.00119392	0.563188	0.00027285	0.618089
PPIL1	0.0102942	0.00119451	0.563168	0.11578	0.293247
HRK	0.0104396	0.00121006	0.562641	0.00181091	0.545778
STT3A	0.0106727	0.0012125	0.562559	0.158828	0.263878
FAM183A	0.00965124	0.00121344	0.562528	0.0317705	0.392817
PIGC	0.010697	0.00121544	0.562461	0.0025426	0.530871
PIFO	0.00959341	0.00121774	0.562384	0.0574587	0.350651
POLR2H	0.0110221	0.00121819	0.562369	0.462919	0.139281
CHI3L1	0.0105401	0.00121865	0.562353	0.00275103	0.527311
CD82	0.0103871	0.00121939	0.562329	0.000348602	0.609634
LRFN3	0.0103973	0.00122033	0.562297	0.00715473	0.48081
UQCC2	0.0104846	0.00122316	0.562202	0.0524005	0.357548
RHNO1	0.0106663	0.00122768	0.562052	4.68717e-06	0.730003
C19orf48	0.0106636	0.00122909	0.562005	0.0724941	0.332629
SRGAP3	0.0105422	0.00123487	0.561813	5.35392e-07	0.773612
OTUB2	0.0101251	0.00123512	0.561805	0.00120869	0.562688
RPS3A	0.010439	0.00123823	0.561702	0.22781	0.226944
KIFC1	0.0104523	0.00124485	0.561484	0.000445096	0.600957
NUP93	0.0108603	0.0012483	0.561371	0.107068	0.300145
SLC51A	0.0107778	0.00126945	0.560683	0.0478867	0.364163
ECE2	0.010365	0.0012727	0.560578	0.0209005	0.419846
FA2H	0.0108001	0.00127446	0.560522	0.000534006	0.594324
POU2F3	0.0104733	0.00128078	0.560319	0.0125677	0.450106
SLC6A13	0.0103818	0.00128476	0.560191	0.00588855	0.490818
COPE	0.0109366	0.00128932	0.560046	0.15343	0.267215
NELFA	0.0104426	0.00129018	0.560018	0.110381	0.297475
FAM227A	0.00994953	0.00129038	0.560012	0.000812182	0.578485
KLHDC9	0.0103136	0.00129171	0.55997	0.0190971	0.425409
NME1.NME2	0.01084	0.00129172	0.559969	0.278429	0.204472
MAGED4B	0.0107213	0.00129246	0.559946	0.0627115	0.343976
ZNF860	0.0102791	0.00129319	0.559923	0.000271071	0.618311
RASSF7	0.0105979	0.00129667	0.559812	0.0172318	0.431639
SCGB1D2	0.0105422	0.00129896	0.55974	0.001883	0.544098
CENPH	0.0100496	0.00129943	0.559725	0.000355306	0.608967
C21orf58	0.0107204	0.00130033	0.559696	0.0151151	0.439426
GAL3ST3	0.00977376	0.00130914	0.559418	0.0671223	0.338701
GLIS2	0.00990593	0.00130958	0.559405	0.0101824	0.461898
ERP27	0.0100733	0.00131221	0.559322	4.59513e-05	0.673045
CHAD	0.00820154	0.00131299	0.559298	0.0488533	0.362706
ADAP1	0.0109939	0.00131314	0.559293	0.353463	0.175548
TATDN1	0.0103587	0.00131857	0.559123	0.14782	0.270775
HES6	0.0111809	0.00132218	0.55901	0.446477	0.144399
LSM14B	0.0105029	0.00133196	0.558706	0.00527081	0.496384
RPS18	0.0102673	0.0013348	0.558618	0.116651	0.29258
PYGO2	0.0108862	0.00133629	0.558572	0.103299	0.30326
ZNF114	0.0102595	0.00133957	0.558471	0.252535	0.215597
PRKX	0.0102226	0.00134538	0.558293	3.43582e-05	0.681055
SCRIB	0.0107437	0.00134975	0.558158	0.107889	0.299477
NAA40	0.0100654	0.00135108	0.558118	5.95315e-05	0.665703
PPP1R14B	0.0106006	0.00135238	0.558078	0.218576	0.231394
TTYH1	0.00963802	0.00135456	0.558011	0.0182782	0.428079
FAM169A	0.0102086	0.00136018	0.55784	0.000104543	0.649015
MORN3	0.00958298	0.00136535	0.557683	0.00102999	0.56914
MRPS23	0.0107319	0.00136905	0.557571	0.0619902	0.344866
RPS10	0.0101347	0.00137079	0.557519	0.134767	0.279453
SHF	0.0104273	0.00140626	0.556459	0.260642	0.212037
KRT7	0.0103248	0.0014063	0.556458	0.0140597	0.443653
RAD54L	0.0104229	0.00141014	0.556345	9.64596e-05	0.651463
DRAXIN	0.0102903	0.00141185	0.556294	5.81636e-05	0.66637
GABBR2	0.0101133	0.00141237	0.556279	0.0169688	0.432562
STK32C	0.0110983	0.00143566	0.555599	0.0798631	0.324841
SLC45A4	0.0105922	0.00143962	0.555484	0.0173599	0.431194
C1orf174	0.00999609	0.00144259	0.555398	0.0274487	0.402492
KRT4	0.0100407	0.0014445	0.555343	0.00172407	0.547882
SPP1	0.0103918	0.00145273	0.555106	9.05896e-06	0.714874
CAMK2B	0.0104916	0.00146304	0.554811	0.000241854	0.622163
THEM6	0.0107982	0.00147402	0.554498	0.692871	0.075203
CRYGN	0.0097826	0.00147677	0.55442	0.692007	0.0754255
FABP6	0.00968385	0.00147919	0.554352	0.0273027	0.40284
ENHO	0.0100947	0.00148411	0.554213	0.147129	0.27122
ZNF184	0.00993428	0.00148536	0.554178	3.82007e-05	0.678162
C9orf117	0.00975037	0.00148783	0.554108	0.101977	0.304372
CCDC78	0.0102231	0.0014909	0.554022	0.00756104	0.477917
NUDT16L1	0.0103736	0.0014986	0.553806	0.158828	0.263878
LTA	0.0105856	0.00150963	0.553499	0.000494046	0.597174
MVB12A	0.0101179	0.00151284	0.55341	0.28111	0.20336
DEGS2	0.00993198	0.00152765	0.553001	0.00227836	0.535766
DMKN	0.0105447	0.00154153	0.552621	0.0722915	0.332851
NT5DC2	0.0105191	0.00155223	0.55233	0.0114354	0.455446
KNOP1	0.0104105	0.00155406	0.55228	0.0261639	0.405607
MORN4	0.0102441	0.00156391	0.552014	0.000678417	0.585382
ALPP	0.010852	0.00156436	0.552002	0.00321529	0.52015
UBTF	0.0103096	0.00156793	0.551906	0.015815	0.436756
TGFA	0.00967178	0.00157096	0.551825	0.00221055	0.537101
AGR2	0.0102639	0.00157165	0.551806	0.10367	0.302949
DAGLB	0.0105747	0.00158059	0.551567	0.0161145	0.435644
HIST1H2BK	0.0101374	0.00158174	0.551537	0.0135817	0.445656
MYO3B	0.0100079	0.00158881	0.551348	7.71801e-08	0.805874
CDHR1	0.0107355	0.00160294	0.550975	0.000229797	0.623874
PDLIM7	0.0093671	0.00160377	0.550953	0.00762525	0.477472
ESRP2	0.0101816	0.00160416	0.550942	0.0343279	0.387585
SLCO1A2	0.00997607	0.00162272	0.550456	0.0114906	0.455175
PPP1R35	0.0100051	0.00163932	0.550025	0.0371069	0.382245
GAL3ST4	0.0102672	0.00164714	0.549823	0.000450624	0.600512
IFITM10	0.00918305	0.0016488	0.54978	0.0933242	0.311937
BOLA2	0.010601	0.00166892	0.549265	0.0852396	0.319502
FANCA	0.0107636	0.00167034	0.549229	7.89308e-05	0.65747
RNF208	0.0106524	0.00167306	0.54916	0.891389	0.0260318
HM13	0.0106577	0.00168327	0.548902	0.0814036	0.323284
VAV2	0.010581	0.00168871	0.548764	0.00499471	0.499054
HIST1H4J	0.0093851	0.00169022	0.548726	0.00477415	0.501279
ADAMTS14	0.00986518	0.00169055	0.548718	0.000171676	0.633441
ZNF19	0.0103775	0.00169382	0.548636	0.0506927	0.359996
OXTR	0.0100301	0.00171027	0.548224	0.00325894	0.519524
POLR3K	0.0108145	0.00171621	0.548076	0.387218	0.163756
UNC13D	0.0104521	0.00173684	0.547567	0.00269759	0.528201
ING4	0.0105078	0.00173691	0.547565	0.00120869	0.562688
HMBS	0.0108158	0.00173845	0.547527	0.338172	0.18111
CCR8	0.00974257	0.00173903	0.547513	0.000211682	0.6266
BEST4	0.0103846	0.00173979	0.547494	0.00733989	0.479475
UBE2Z	0.0104336	0.0017398	0.547494	0.0970703	0.308599
BEX2	0.0102746	0.00174001	0.547488	0.0424035	0.3729
RABEP2	0.0106628	0.00174253	0.547427	0.0685261	0.337079
FERMT1	0.0102231	0.00174283	0.547419	0.0100597	0.462565
TMEM8A	0.0108477	0.00175714	0.54707	0.097833	0.307932
KIAA1199	0.010738	0.00175757	0.547059	0.00118253	0.563578
FAM213B	0.010897	0.00176814	0.546803	0.0101005	0.462343
PHOX2A	0.00934203	0.00176825	0.5468	0.00757407	0.477827
DAP	0.00980539	0.00177761	0.546574	0.00275103	0.527311
CD74	0.00979725	0.0017832	0.54644	0.00575993	0.491935
C19orf77	0.0110558	0.00178496	0.546397	0.00110702	0.566248
MBD4	0.00957864	0.00178715	0.546345	0.00101289	0.569808
MEA1	0.0099983	0.00179289	0.546207	0.128097	0.284125
ZDHHC12	0.0107204	0.00179354	0.546192	0.0625305	0.344198
MED20	0.00986047	0.0017939	0.546183	0.0500827	0.360886
DCBLD1	0.0105838	0.00182301	0.545492	0.170794	0.256758
CABLES2	0.0105112	0.00182432	0.545461	0.0471196	0.365335
TMEM52B	0.0106753	0.00182909	0.545349	0.00202784	0.540883
ZFYVE19	0.0103908	0.00184098	0.54507	0.126237	0.28546
RUVBL1	0.0103675	0.00185542	0.544734	0.113483	0.295027
CLIC6	0.00949636	0.00185715	0.544694	0.00107681	0.56736
DEF6	0.0098569	0.00186136	0.544596	0.00143671	0.555568
ITGB4	0.00981382	0.00186723	0.54446	0.0401912	0.376683
SLC44A3	0.00906398	0.00187836	0.544204	0.047847	0.364223
ENC1	0.0102992	0.00189065	0.543923	0.0996302	0.306374
ETNK2	0.00972883	0.00189126	0.543909	0.00433795	0.505952
LIMS3L	0.00947334	0.00189791	0.543757	0.00294534	0.524196
ZIC1	0.00948491	0.00189862	0.543741	0.0169109	0.432767
ROGDI	0.010732	0.00189988	0.543712	0.0866259	0.318167
ACOT11	0.00997396	0.00190854	0.543516	0.000357566	0.608744
COMMD7	0.0109903	0.0019092	0.543501	0.239234	0.221604
C12orf10	0.00985442	0.00191719	0.54332	0.301455	0.195127
FAM64A	0.010321	0.00191733	0.543317	0.00149925	0.553788
SLAIN1	0.00999825	0.0019203	0.54325	0.0499312	0.361108
H1F0	0.0101538	0.00193189	0.542989	0.000537854	0.594059
TAPBP	0.00997965	0.00193792	0.542854	0.0156965	0.437201
KLK8	0.010388	0.00195041	0.542576	0.0275423	0.402269
PLEKHN1	0.0100499	0.00195609	0.54245	0.0027781	0.526866
DCTPP1	0.0107173	0.00195625	0.542446	0.130609	0.282345
CERCAM	0.00983637	0.00195681	0.542434	0.00765752	0.47725
ZWINT	0.010345	0.00195784	0.542411	2.39906e-05	0.690622
SH3BP5L	0.0101854	0.0019742	0.54205	0.0052944	0.496162
CABIN1	0.0102376	0.00198079	0.541905	0.000373743	0.607187
EEF1G	0.01015	0.0019865	0.54178	0.14371	0.273445
GABRQ	0.010339	0.00198923	0.54172	0.0325495	0.391188
CCNB1	0.0104831	0.00199545	0.541584	0.000200893	0.628324
NT5C	0.00977935	0.0019981	0.541527	0.34363	0.179108
FAM83E	0.0100783	0.00200099	0.541464	0.0499602	0.361065
MLST8	0.0104829	0.0020083	0.541305	0.718107	0.0687507
CD22	0.0102096	0.00201362	0.54119	0.000176469	0.632551
ABCB9	0.0100846	0.00202517	0.540941	0.0339927	0.388252
MCU	0.0103134	0.00203007	0.540835	0.00031673	0.612971
PPP2R4	0.0107626	0.00203077	0.54082	0.0658504	0.340194
TROAP	0.0101947	0.00203362	0.540759	0.000265794	0.618979
RPL12	0.0101279	0.00203652	0.540697	0.267353	0.209145
GEMIN2	0.0103776	0.00204236	0.540572	0.0034019	0.517521
MPZL3	0.00992395	0.00205622	0.540277	0.00486136	0.500389
IGF2BP2	0.0100573	0.00207387	0.539903	0.25505	0.214484
DMRT1	0.0100942	0.00208127	0.539748	0.000100303	0.650277
KIAA1549L	0.0098039	0.0021002	0.539351	0.00319709	0.520414
MSI1	0.00975216	0.00210978	0.539152	0.00393632	0.510624
RNF26	0.0106515	0.00211172	0.539112	0.320946	0.187563
ELFN2	0.00973068	0.00211272	0.539091	0.000141241	0.639671
THY1	0.00964803	0.00212083	0.538923	0.00449992	0.504172
CNTN5	0.0100431	0.00212624	0.538811	0.000780985	0.579999
DTD1	0.010418	0.0021359	0.538612	0.0468311	0.36578
TICRR	0.0100496	0.00213592	0.538612	0.000420953	0.602959
TMPRSS3	0.0101135	0.00213626	0.538605	0.00946442	0.465903
LRRC23	0.00947966	0.00213753	0.538579	0.226408	0.227612
ISM1	0.00959924	0.00214356	0.538455	0.041481	0.374458
CDC20	0.0102411	0.00214768	0.538371	0.00021062	0.626766
TRO	0.0100413	0.00214939	0.538336	0.00189709	0.543776
NBL1	0.00981943	0.00215246	0.538273	0.0407032	0.375793
LEMD2	0.0100881	0.00215587	0.538204	0.144049	0.273223
ATP13A1	0.0101906	0.00215661	0.538188	0.00962018	0.465013
XRCC3	0.0108314	0.00215874	0.538145	0.0040665	0.509067
VAX2	0.01034	0.002168	0.537957	0.0481404	0.363778
ZNF627	0.0100071	0.00217197	0.537877	5.77139e-05	0.666593
TMEM147	0.010154	0.00217594	0.537796	0.203901	0.238736
CACNA1F	0.00946972	0.00217713	0.537772	0.00136174	0.557793
TRIP13	0.0102627	0.00218863	0.53754	0.000744821	0.581822
TRAPPC9	0.00985138	0.0022017	0.537278	0.213159	0.234064
WDR96	0.0101097	0.00220237	0.537264	0.0958092	0.309712
NKAIN1	0.00987781	0.0022025	0.537262	0.0106861	0.459228
HIST1H2AG	0.0105258	0.00220473	0.537217	0.0471196	0.365335
TK1	0.0103218	0.00220585	0.537195	0.00128323	0.56024
ACP1	0.0100067	0.00220843	0.537143	0.00860946	0.47102
ENPP5	0.00997833	0.00220989	0.537114	0.00604505	0.489487
ZNF7	0.0101941	0.00221061	0.5371	0.278964	0.20425
MORN2	0.00980991	0.0022164	0.536984	0.37491	0.167983
PDIA3	0.0105256	0.00221767	0.536959	0.197885	0.241851
SNAP47	0.010183	0.00222109	0.536891	0.0792098	0.325509
TRIM26	0.0100915	0.00222112	0.536891	0.0318249	0.392702
TMEM79	0.0102325	0.00222249	0.536863	0.00246804	0.532206
TNFRSF18	0.00984321	0.00222333	0.536847	0.052558	0.357326
USP39	0.0100563	0.00222842	0.536746	0.0300715	0.396485
PTGER1	0.00990001	0.0022305	0.536705	0.0591697	0.348426
KIAA1211	0.0097252	0.00223711	0.536574	9.94591e-06	0.712649
FSCN1	0.0103273	0.00224323	0.536453	0.00458282	0.503282
ZNF260	0.00995597	0.00224469	0.536424	0.00243147	0.532874
CREB3L1	0.00962008	0.00224672	0.536385	0.000388119	0.605852
EXOSC4	0.0105109	0.00227769	0.535779	0.104098	0.302592
PTTG1	0.0103005	0.00228391	0.535658	0.000362124	0.608299
SMC4	0.0102161	0.0022884	0.535571	0.000333392	0.611191
USP11	0.00978718	0.00229141	0.535513	0.029571	0.397597
ZDHHC13	0.010706	0.00231263	0.535104	0.0716866	0.333519
PAK1	0.0103072	0.00232066	0.53495	0.00150723	0.553565
FOXO6	0.00977996	0.00233595	0.534659	0.0239083	0.411392
GINS1	0.00990823	0.00234591	0.53447	0.000439628	0.601402
AURKA	0.0100616	0.00234964	0.534399	3.32477e-05	0.681945
C6orf52	0.00943354	0.00234969	0.534398	0.0105159	0.460118
ERBB2	0.0100623	0.00235938	0.534215	0.010019	0.462788
FAM211B	0.00937359	0.00236257	0.534155	0.107342	0.299922
ERBB3	0.0100259	0.00236584	0.534093	0.00612486	0.48882
POLA2	0.0101496	0.00237199	0.533978	0.00802029	0.474803
TMEM121	0.0100685	0.00238281	0.533775	0.141686	0.27478
BBOX1	0.0100532	0.0023884	0.533671	0.00615167	0.488597
RUVBL2	0.0102085	0.00239473	0.533553	0.50727	0.125932
PCDHA7	0.00912711	0.00240818	0.533303	0.0251022	0.408277
ZNF280B	0.00958331	0.00241148	0.533242	0.000232881	0.623429
MREG	0.0100086	0.00241215	0.53323	0.000113223	0.646568
C1QL4	0.0101499	0.00241607	0.533157	0.473811	0.135944
SMARCD2	0.0104082	0.00241846	0.533113	0.125622	0.285905
VGLL1	0.00992268	0.00242252	0.533038	2.65534e-05	0.687954
INPP5J	0.0102298	0.00242254	0.533038	0.0584806	0.349316
ZNF750	0.00992099	0.00244108	0.532697	0.0109895	0.45767
PTPRN	0.00931117	0.00245018	0.532531	0.0196445	0.423676
MFSD10	0.0102059	0.00246074	0.532339	0.442945	0.145511
NLRP7	0.010076	0.00247464	0.532086	0.000177282	0.632402
STRBP	0.0100755	0.00247917	0.532004	0.056953	0.351318
ACBD6	0.0102952	0.00248429	0.531912	0.0561181	0.352431
SIX4	0.00942862	0.00248508	0.531898	0.009349	0.46657
PACSIN3	0.0101575	0.00248584	0.531884	0.0612754	0.345756
PLOD1	0.0102046	0.00249239	0.531766	0.0718878	0.333296
IGF2BP3	0.00990673	0.00252123	0.53125	8.19444e-05	0.656358
SHROOM3	0.00974036	0.00252467	0.531189	0.00494992	0.499499
TCEB2	0.00985411	0.0025281	0.531128	0.379417	0.166426
ENTPD2	0.0100837	0.0025421	0.53088	0.0906474	0.314384
PSAT1	0.00974241	0.00255119	0.53072	0.00300299	0.523306
CSK	0.0099458	0.00255522	0.530648	0.00563417	0.493047
ZBTB9	0.00965703	0.00255788	0.530602	0.0279198	0.401379
PRSS16	0.00997779	0.00258035	0.530208	0.0186158	0.426966
PCNXL3	0.0102319	0.00259378	0.529974	0.000860001	0.57626
TSPAN33	0.0102546	0.00261184	0.529662	0.0166034	0.433864
DUSP9	0.0100562	0.00262435	0.529446	0.6291	0.0919003
CACNB1	0.00933942	0.00262457	0.529442	0.00795327	0.475248
SSR4	0.0101637	0.00262536	0.529429	0.0933242	0.311937
DCAF7	0.00958815	0.00263122	0.529328	0.000152572	0.637223
MANEAL	0.00939054	0.00263502	0.529263	0.00882595	0.469685
UBE2T	0.0100559	0.00268174	0.528468	0.0003147	0.613194
RAB34	0.00960194	0.00268347	0.528439	0.0084325	0.472133
BOLA2B	0.0101722	0.00268416	0.528427	0.0369876	0.382467
ABHD16A	0.00942267	0.00268646	0.528388	0.0101824	0.461898
SIRT7	0.0103507	0.00269281	0.528282	0.100668	0.305484
FAM195B	0.00989707	0.00269696	0.528212	0.608434	0.0974524
NEK2	0.00986894	0.00270277	0.528114	0.000592074	0.5905
POLD1	0.0100638	0.00270904	0.528009	0.000561013	0.592502
NAB2	0.00978177	0.00271466	0.527915	0.0221265	0.416287
CARD11	0.0101163	0.00273208	0.527625	0.000180141	0.631883
TMPRSS6	0.00992151	0.00275674	0.527217	0.00054217	0.593765
LIMK2	0.0102778	0.00276436	0.527092	0.082294	0.322394
LPAR2	0.0102113	0.00277333	0.526944	0.0254521	0.407387
SORL1	0.00953828	0.00277521	0.526914	0.0039547	0.510402
TACC3	0.0100887	0.00280497	0.526428	0.00718531	0.480587
ATP6V0B	0.0105942	0.00280501	0.526427	0.0432071	0.371565
TRPM2	0.0102838	0.00281415	0.526279	0.00497227	0.499277
LGALS3BP	0.0100443	0.00281913	0.526199	0.296979	0.196907
MAPK8IP1	0.0100033	0.00282018	0.526182	0.00445895	0.504617
TSPAN1	0.00971216	0.00282078	0.526172	0.00291688	0.524641
MACC1	0.00935062	0.00282204	0.526152	0.0152876	0.438758
PLCH1	0.00983171	0.00282218	0.526149	0.0195177	0.424074
HOMER3	0.0101867	0.00284732	0.525745	0.0541534	0.355101
RPP21	0.00982275	0.00285792	0.525575	0.574315	0.106797
PCSK1N	0.00888299	0.00285863	0.525564	0.0627115	0.343976
TFR2	0.0100012	0.0028809	0.525209	0.0202357	0.421849
QPCTL	0.00989555	0.00288461	0.52515	0.0119433	0.452998
RAB11FIP4	0.00979823	0.00290255	0.524867	4.24236e-05	0.67527
EIF6	0.0102561	0.00290749	0.524789	0.193245	0.244299
LSM4	0.0106359	0.00293878	0.524298	0.269441	0.208255
ZNF581	0.00985704	0.00294921	0.524136	0.183385	0.249638
ENDOV	0.0101535	0.00295661	0.524021	0.104902	0.301925
EFHC2	0.00986201	0.00296266	0.523927	0.000170496	0.633663
ATP5G1	0.00989061	0.00296864	0.523835	0.133477	0.280343
EPS8L1	0.00951995	0.0029704	0.523808	0.0152876	0.438758
AGR3	0.00973465	0.00297207	0.523782	0.0175531	0.430527
TRAM1L1	0.0099045	0.00297521	0.523733	0.00425885	0.506842
C3orf80	0.00952229	0.00297738	0.5237	0.00232455	0.534876
TCF19	0.00981505	0.0029775	0.523698	0.000686423	0.584937
CD47	0.00938073	0.00297999	0.523659	0.00116964	0.564023
GSTO1	0.00972136	0.00298138	0.523638	0.046116	0.366893
WISP3	0.0096788	0.00300452	0.523283	0.00670997	0.48414
REEP4	0.0102476	0.00300985	0.523201	0.00226693	0.535988
PPDPF	0.0104088	0.0030266	0.522946	0.450736	0.143064
KIF3C	0.010064	0.00302941	0.522903	0.00897281	0.468795
KCNK15	0.0100423	0.00303184	0.522866	0.281648	0.203137
RPSA	0.0100301	0.00304084	0.52273	0.14644	0.271665
RAB3IP	0.00972828	0.00305851	0.522463	0.0870919	0.317722
TMC6	0.00980754	0.00307611	0.522198	0.000831022	0.577595
STX1A	0.0090921	0.00307686	0.522187	0.0798631	0.324841
NEU1	0.00997115	0.00307794	0.522171	0.209157	0.236066
MMP14	0.00975276	0.00308746	0.522028	0.00558452	0.493492
MYBL2	0.00996559	0.00309688	0.521888	5.42266e-05	0.668372
NRCAM	0.00928939	0.00313336	0.521346	0.00245579	0.532429
CDC45	0.00971033	0.00313678	0.521296	4.10818e-05	0.67616
NDC80	0.00969873	0.00313869	0.521268	0.000106075	0.64857
LMAN2	0.0101559	0.00314039	0.521243	0.271538	0.207365
BABAM1	0.0103721	0.0031473	0.521141	0.762294	0.057626
PRSS50	0.0093779	0.00314889	0.521118	0.0161145	0.435644
RAE1	0.0100673	0.00316926	0.520819	0.0219701	0.416732
CCNB2	0.00996599	0.00317426	0.520746	0.000456212	0.600067
EPS8L2	0.00990714	0.00319182	0.52049	0.0238249	0.411614
CAMK2N2	0.0102519	0.00320851	0.520248	0.0549653	0.353988
UBE2C	0.00982346	0.00321681	0.520129	0.000359838	0.608522
CTSB	0.00983418	0.00321837	0.520106	0.0030616	0.522416
TMUB1	0.0103113	0.00321888	0.520099	0.516386	0.123262
C20orf112	0.00970396	0.00321961	0.520088	0.0140597	0.443653
GSTA1	0.00995832	0.00322013	0.520081	0.0132187	0.447216
NDUFB9	0.0102008	0.00322089	0.52007	0.651812	0.0858827
ABCC3	0.00953519	0.0032347	0.519871	0.0134254	0.446323
C1orf145	0.00964554	0.00323726	0.519834	0.0191666	0.425186
ATP2B2	0.00858258	0.00324168	0.519771	0.00336967	0.517966
AURKB	0.00975979	0.00324953	0.519658	0.000134425	0.641228
PARS2	0.0100227	0.00324966	0.519657	0.0341042	0.38803
SLC25A39	0.00998365	0.00325022	0.519649	0.220402	0.230504
IQCG	0.0100508	0.0032752	0.519292	0.404433	0.157971
TGIF2.C20orf24	0.00971183	0.00328857	0.519103	0.0211187	0.419201
FAM211A	0.00974813	0.00330055	0.518933	0.023992	0.411169
FAAH2	0.0098599	0.00330756	0.518835	0.020163	0.422071
COL5A2	0.00911082	0.00332593	0.518576	0.00775505	0.476582
NRG3	0.00933231	0.00333771	0.518411	0.0718878	0.333296
RCN2	0.00943136	0.00334356	0.51833	0.0191666	0.425186
CUEDC1	0.0103065	0.00334807	0.518267	0.362833	0.17221
ANKRD45	0.00961848	0.00334876	0.518257	0.00977808	0.464123
NARS2	0.00988588	0.00334947	0.518247	0.0820707	0.322617
SOHLH2	0.00971444	0.00337429	0.517902	0.0154618	0.438091
GALE	0.0100735	0.00341418	0.517353	0.0335499	0.389142
BRMS1	0.0100486	0.00342233	0.517241	0.173107	0.255423
CNN2	0.00881201	0.0034235	0.517225	0.256567	0.213817
PROM1	0.00960047	0.00342741	0.517172	0.015815	0.436756
NRM	0.00997045	0.00343123	0.517119	0.0251893	0.408054
TPI1	0.0101931	0.00344282	0.516961	0.272065	0.207142
PDE6G	0.00947694	0.00348134	0.51644	0.0015975	0.551118
HUNK	0.00971623	0.00349868	0.516206	0.0301724	0.396262
C8orf82	0.00992091	0.00350246	0.516156	0.801798	0.0478362
ZNF205	0.0100379	0.00350479	0.516124	0.155933	0.265658
ANO9	0.00985277	0.00352224	0.515891	0.0012153	0.562465
BRE	0.0091414	0.00354481	0.515591	0.0980882	0.307709
ORC1	0.00967061	0.0035485	0.515542	0.000423578	0.602737
ZNF300	0.00935852	0.00355196	0.515496	0.00384554	0.511737
SKA3	0.00990001	0.00355857	0.515408	0.000247216	0.621426
ACTL6A	0.00963584	0.00356681	0.515299	0.0861619	0.318612
GINS4	0.00955319	0.00357487	0.515193	0.000439628	0.601402
ZNF726	0.00972595	0.00357927	0.515135	4.74344e-05	0.672155
AP5S1	0.00967803	0.00358675	0.515037	0.0181446	0.428524
ASIC2	0.00973402	0.00359033	0.51499	0.252033	0.215819
ZNF408	0.00963258	0.00359131	0.514977	0.0584806	0.349316
MAP1S	0.0100082	0.00359349	0.514948	0.134121	0.279898
COL16A1	0.00889309	0.00360422	0.514807	0.000651039	0.58694
TMEM186	0.0101125	0.00360899	0.514745	0.570311	0.10791
C17orf104	0.00963046	0.00361814	0.514626	0.00594001	0.490377
MPZL2	0.00933054	0.00362403	0.514549	0.00294534	0.524196
THOC3	0.00991988	0.00362692	0.514511	0.00464586	0.502614
RGS19	0.00988786	0.00362857	0.51449	0.00241938	0.533096
ZNF414	0.00865304	0.00363574	0.514397	0.275766	0.205585
CDCA3	0.00999458	0.00364311	0.514301	0.000119934	0.644788
PASK	0.00940704	0.00364587	0.514265	0.000719281	0.583157
BUB1B	0.00971778	0.0036672	0.513989	0.000585044	0.590944
SFRP4	0.00842998	0.00367244	0.513922	0.00393632	0.510624
KCNS3	0.009526	0.00367893	0.513838	0.163615	0.260986
TMEM205	0.0100596	0.00368088	0.513813	0.322703	0.186895
NUF2	0.00960845	0.00368771	0.513726	7.37545e-05	0.659473
RARG	0.00979943	0.00369547	0.513626	0.00353346	0.515741
TMEM158	0.00956684	0.00370478	0.513507	0.217213	0.232061
EME1	0.0094094	0.00370915	0.513451	0.00028746	0.616309
FOXS1	0.00989018	0.003715	0.513377	0.0122762	0.451441
STX19	0.00925369	0.00371731	0.513347	0.000272206	0.618169
BAX	0.0100945	0.00371748	0.513345	0.0283974	0.400267
C14orf79	0.00912069	0.00373537	0.513117	0.128722	0.28368
RECQL5	0.00988723	0.00373777	0.513087	0.233951	0.224052
CCDC28B	0.00968785	0.00374633	0.512979	0.0196596	0.423629
P4HA1	0.00953042	0.0037478	0.51296	0.00709389	0.481255
APOA1BP	0.0101382	0.0037495	0.512938	0.341805	0.179775
JTB	0.0100661	0.0037561	0.512855	0.11122	0.296807
LRFN4	0.0101042	0.00375911	0.512817	0.17978	0.251641
PSMB10	0.00983759	0.00375925	0.512815	0.057628	0.350428
NR2C2AP	0.00997652	0.00376817	0.512703	0.129978	0.28279
TTC5	0.00934272	0.0037685	0.512699	0.0200181	0.422516
PSD	0.00945686	0.00378445	0.512498	0.00115688	0.564468
GTF3C2	0.00943633	0.00378955	0.512434	0.0231657	0.413394
ZNF296	0.00956046	0.00379082	0.512418	0.00338575	0.517744
STXBP5L	0.00831272	0.0038189	0.512067	0.00430502	0.50632
ANP32A	0.0103979	0.00382827	0.511951	0.166234	0.259428
APOA1	0.0099173	0.00383324	0.511889	0.00791994	0.47547
C9orf152	0.00974239	0.00386267	0.511525	0.00529596	0.496147
NUAK2	0.00946414	0.00386268	0.511525	0.0490293	0.362443
WDR62	0.0099134	0.00386388	0.51151	0.00688441	0.482812
ZKSCAN4	0.00942516	0.00388924	0.511198	0.000420953	0.602959
TOR2A	0.00956361	0.00390315	0.511028	0.00691401	0.48259
NDUFB11	0.0103382	0.00390863	0.510961	0.393129	0.161753
INPPL1	0.00995862	0.00391434	0.510892	0.0039547	0.510402
PDE9A	0.00981638	0.00391866	0.510839	0.189093	0.246524
ERI3	0.00990172	0.00392869	0.510717	0.190746	0.245634
ST6GALNAC4	0.00992559	0.00393181	0.510679	0.268396	0.2087
SH3BP1	0.0099179	0.00394366	0.510535	0.00421977	0.507287
C12orf68	0.00883729	0.00395464	0.510402	0.0892122	0.315719
TMEM30B	0.00923168	0.00395572	0.510389	0.0138455	0.444543
PTPN6	0.00982919	0.00395896	0.51035	0.000371393	0.607409
FHL2	0.00862431	0.00397477	0.51016	0.0139523	0.444098
WBP2NL	0.00955357	0.00397701	0.510133	0.26013	0.212259
VWA2	0.00919265	0.00399228	0.509949	0.00040047	0.604739
DDX49	0.00981708	0.00399771	0.509884	0.0319305	0.39248
PWWP2B	0.0100097	0.00399919	0.509867	0.230159	0.225832
SUPT3H	0.00814878	0.00401555	0.509671	0.00946442	0.465903
EYA2	0.0104379	0.00401749	0.509648	0.197885	0.241851
NFKBIL1	0.00942005	0.00401767	0.509646	0.0779155	0.326844
GLS2	0.00917966	0.00402625	0.509544	0.0369876	0.382467
PBX2	0.009513	0.00402963	0.509503	0.0777014	0.327066
GPAA1	0.00977038	0.0040335	0.509457	0.487055	0.131939
CHEK2	0.00983083	0.00403618	0.509425	0.0229224	0.414062
ZNF786	0.0101809	0.00405141	0.509245	0.00391802	0.510847
SLC2A1	0.00932119	0.00405864	0.509159	0.0166654	0.433641
DPF3	0.0092707	0.00406091	0.509133	0.200019	0.240739
KLHDC7B	0.0091457	0.00406116	0.50913	0.000129738	0.642341
DLX5	0.00861358	0.0040982	0.508694	0.00904701	0.46835
FAM60A	0.00914882	0.00410444	0.508621	0.0137395	0.444988
SLC17A9	0.0096313	0.00410837	0.508575	0.00245579	0.532429
ZNF439	0.00913279	0.00412064	0.508431	8.35078e-07	0.76538
DVL3	0.00950988	0.00412825	0.508343	0.102769	0.303705
DCAF12L1	0.0092406	0.00417398	0.507813	0.0142136	0.443021
ZNF74	0.00953118	0.00418113	0.50773	0.0171681	0.431861
EXOSC5	0.00996321	0.00418498	0.507686	0.900625	0.0238069
ACOT7	0.00957224	0.00418692	0.507663	0.236343	0.222939
C1orf192	0.00852105	0.00419701	0.507547	0.0555902	0.353141
FAM192A	0.00964029	0.00420387	0.507469	0.406447	0.157303
ITPR3	0.00929202	0.00422119	0.50727	0.0789929	0.325731
FOXM1	0.00976101	0.00423397	0.507125	8.19444e-05	0.656358
BCL2L12	0.00992848	0.00424019	0.507054	0.137045	0.277895
AKAP8L	0.00886338	0.00426046	0.506823	0.12018	0.28991
LINGO1	0.00932244	0.00426306	0.506794	0.000879808	0.57537
NGFRAP1	0.00998247	0.00426721	0.506747	0.661139	0.0834353
COIL	0.00980349	0.00429319	0.506454	0.0735133	0.331516
CDCA8	0.00947037	0.00430759	0.506292	1.48523e-05	0.702859
RNF144B	0.00909073	0.0043242	0.506105	0.0117564	0.453888
DPEP3	0.0087973	0.00434804	0.505839	0.241174	0.220714
RTKN2	0.00922788	0.00436144	0.50569	0.000192875	0.629658
EXTL1	0.00925875	0.00437125	0.505581	0.00232455	0.534876
ADCK2	0.00983739	0.00437404	0.50555	0.0768494	0.327956
C17orf62	0.0102254	0.00439472	0.505321	0.158101	0.264323
TPX2	0.00949222	0.00441209	0.50513	9.4931e-06	0.713761
TNNT2	0.0092617	0.00441422	0.505107	0.104902	0.301925
GREB1	0.00992051	0.00442545	0.504983	0.00586226	0.491045
CBS	0.00948153	0.00443733	0.504853	0.00158075	0.551563
BRSK1	0.008933	0.00444698	0.504747	0.00040047	0.604739
RHEBL1	0.00911503	0.00445024	0.504712	0.000602758	0.589832
C5orf34	0.00911881	0.0044512	0.504701	4.28178e-06	0.732006
GET4	0.0100062	0.00445556	0.504654	0.273647	0.206475
ZFP64	0.0098388	0.00448006	0.504387	0.0318249	0.392702
IDH2	0.009462	0.00448109	0.504376	0.0327861	0.3907
HIST1H2BJ	0.0101142	0.00448255	0.50436	0.185003	0.248748
IGSF21	0.00889462	0.00449843	0.504188	0.120478	0.289687
HYLS1	0.0101007	0.0044985	0.504187	0.0399371	0.377128
ADAMTSL2	0.00904557	0.00450396	0.504128	0.0960604	0.309489
MUC20	0.00968552	0.00450964	0.504067	0.00553525	0.493937
SCG5	0.00912338	0.00450997	0.504063	0.00871714	0.470353
MRPL12	0.0101264	0.00451116	0.50405	0.967423	0.0077873
YIF1A	0.00960096	0.00452321	0.50392	0.289249	0.200022
ERCC6L	0.00973291	0.00452382	0.503914	0.00772243	0.476805
RELL2	0.00912928	0.00452781	0.503871	0.00486136	0.500389
AFMID	0.00991457	0.00453889	0.503752	0.140016	0.275893
CACNB3	0.00968728	0.00454148	0.503724	0.0181446	0.428524
C17orf49	0.0091933	0.00454198	0.503718	0.152721	0.26766
RPL10A	0.00914381	0.00454492	0.503687	0.389839	0.162866
NREP	0.00901452	0.00456197	0.503504	8.19444e-05	0.656358
COL2A1	0.00831131	0.00460335	0.503064	0.0467259	0.365943
CCDC157	0.00967696	0.00461808	0.502908	0.260642	0.212037
DYRK1B	0.00944668	0.00463286	0.502751	0.0127653	0.449216
GPRIN1	0.00959119	0.00463859	0.502691	0.11607	0.293025
VGLL4	0.00946466	0.00463913	0.502685	0.0429379	0.37201
MFGE8	0.00858108	0.00464243	0.50265	0.100668	0.305484
PLXNB2	0.00976101	0.00464755	0.502596	0.0235759	0.412282
GTF3C5	0.00987971	0.00466401	0.502424	0.570311	0.10791
CORO2A	0.00921476	0.0046807	0.502249	0.000482121	0.598064
PLK4	0.00928464	0.00468571	0.502196	2.79282e-05	0.686617
SIGLEC10	0.00902383	0.00468599	0.502193	0.00246804	0.532206
NUP210	0.00927962	0.00469802	0.502068	2.20254e-05	0.692847
DNAAF3	0.00888713	0.00470705	0.501974	0.03558	0.385137
FOXA2	0.0087913	0.00470752	0.501969	0.0222077	0.416057
CHRNA5	0.00942789	0.0047122	0.50192	0.182982	0.249861
CBX1	0.00911929	0.00472751	0.501761	0.0158745	0.436534
B3GNTL1	0.0095315	0.00472857	0.50175	0.439428	0.146624
ALG1	0.0100524	0.0047306	0.501729	0.443651	0.145289
CLGN	0.00930962	0.00475037	0.501524	0.00187764	0.544221
APEX1	0.00976829	0.00475557	0.501471	0.418648	0.153298
ZNF444	0.00996454	0.00476243	0.5014	0.367255	0.170653
TPD52	0.00953407	0.00476876	0.501335	0.000581556	0.591167
SDR42E1	0.00956942	0.00479093	0.501107	0.211374	0.234954
KIFC2	0.00948205	0.00479431	0.501072	0.0424035	0.3729
COA4	0.00959146	0.00482809	0.500727	0.393789	0.161531
TNS4	0.00914	0.00483798	0.500627	0.0221265	0.416287
C16orf13	0.009534	0.00483879	0.500618	0.968353	-0.0075648
GGT1	0.00930321	0.00484494	0.500556	0.00875328	0.47013
APEH	0.0101845	0.0048763	0.500238	0.225013	0.228279
EVA1B	0.00915435	0.00487818	0.500219	0.0935704	0.311714
TP53	0.00992527	0.00487985	0.500202	0.341198	0.179998
C11orf45	0.00944286	0.00488414	0.500159	6.68122e-05	0.662365
ANKZF1	0.00949202	0.00491659	0.499833	0.00404768	0.509289
ESRRG	0.00893786	0.00493245	0.499674	0.0327861	0.3907
SUMO3	0.00948296	0.00493343	0.499664	0.221319	0.230059
C19orf57	0.00965793	0.0049352	0.499646	0.0108153	0.45856
CDC25C	0.00954693	0.00494333	0.499565	0.00829315	0.473023
TPRA1	0.00968802	0.00494946	0.499504	0.172334	0.255868
IFT122	0.00909923	0.00498421	0.499158	0.175051	0.254311
ZNF185	0.00985557	0.00499155	0.499086	0.0911297	0.313939
NSUN5	0.00958233	0.00505497	0.498461	0.041481	0.374458
LTBP2	0.00853463	0.00505678	0.498443	0.0176834	0.430081
NUP85	0.0099884	0.0050691	0.498323	0.472351	0.136389
GEMIN6	0.00988395	0.00507998	0.498217	0.0953082	0.310157
DNAJB11	0.00956325	0.00508637	0.498154	0.168124	0.258316
MUTYH	0.00891961	0.00508745	0.498144	0.0161749	0.435421
TLCD1	0.00956044	0.00512002	0.497827	0.0109021	0.458115
CKLF	0.00930726	0.00512974	0.497733	0.22781	0.226944
TTK	0.00941893	0.00514608	0.497576	0.00018138	0.631661
SLC38A5	0.0094089	0.00514985	0.497539	0.0383169	0.38002
IL21R	0.00938502	0.00516531	0.49739	0.00466703	0.502392
UNC93B1	0.00940047	0.00517121	0.497334	0.000187688	0.630548
IGLL5	0.00894539	0.00517853	0.497263	0.0134773	0.446101
GPN1	0.00949656	0.00517948	0.497254	0.208715	0.236289
SLC22A18	0.00942152	0.00518398	0.497211	0.0231657	0.413394
FAM227B	0.0086148	0.00518705	0.497182	0.000512421	0.595839
TREM2	0.00934412	0.00520384	0.497021	2.03817e-05	0.694849
COMTD1	0.00952778	0.00520748	0.496986	0.790072	0.0507287
C1orf86	0.00885895	0.00528237	0.496275	0.284347	0.202025
RPS6KA1	0.00973827	0.00528703	0.496231	0.00418099	0.507732
CCDC77	0.00919737	0.0052936	0.49617	0.0167899	0.433196
DPH7	0.00896644	0.00530887	0.496026	0.109268	0.298365
SMO	0.009199	0.00531135	0.496003	0.00287463	0.525309
NOSIP	0.00997398	0.00531835	0.495937	0.978589	0.00511737
NCAPG	0.00945982	0.0053237	0.495887	0.000165848	0.634553
KIF4A	0.00945173	0.00532793	0.495847	0.000135381	0.641006
LIMD2	0.00912163	0.00534651	0.495673	0.00418099	0.507732
TRPV6	0.00899962	0.00535624	0.495583	0.0146138	0.441402
FLYWCH2	0.00957302	0.00536364	0.495514	0.517913	0.122817
ZNF793	0.00901108	0.00536612	0.495491	0.00437796	0.505507
NOA1	0.00955379	0.00537616	0.495397	0.124092	0.287017
HAUS8	0.0100702	0.00537742	0.495385	0.16029	0.262988
ZBTB48	0.00821273	0.00542506	0.494944	0.0252767	0.407832
POU5F1	0.00923424	0.00544128	0.494795	0.0104317	0.460563
PRKCQ	0.00920248	0.00544891	0.494725	4.38045e-05	0.67438
ZFP82	0.00931589	0.00547532	0.494483	0.0140059	0.443876
WDR83	0.00896214	0.00548012	0.494439	0.157376	0.264768
PRUNE	0.00956402	0.00549814	0.494274	0.0172318	0.431639
RAI1	0.00925923	0.00553285	0.493959	0.00481759	0.500834
KDELR1	0.00976976	0.00554368	0.493861	0.415238	0.154411
STXBP2	0.00957277	0.00556246	0.493691	0.00795327	0.475248
LMAN2L	0.0100202	0.00557908	0.493541	0.481145	0.133719
CCDC22	0.0096356	0.00559678	0.493382	0.098344	0.307487
DNAH2	0.00956853	0.00562283	0.493148	0.00324338	0.519746
CCNJL	0.00968485	0.0056285	0.493098	0.0147749	0.440761
CWC15	0.00901624	0.00566634	0.49276	0.326233	0.18556
DTYMK	0.0100028	0.00567583	0.492676	0.19241	0.244744
NSMCE2	0.0096848	0.0057084	0.492388	0.189093	0.246524
ZBTB8B	0.00929521	0.00572176	0.49227	0.359067	0.173545
VWA1	0.00948565	0.00573281	0.492173	0.443651	0.145289
AGBL2	0.00880565	0.00573568	0.492148	0.00363497	0.514407
ZMYND15	0.00892528	0.00573973	0.492112	9.64596e-05	0.651463
S100A1	0.00964961	0.00574948	0.492026	0.0302736	0.39604
FBXO21	0.00864608	0.00575294	0.491996	0.0166034	0.433864
MRPS34	0.00983866	0.00576509	0.491889	0.859183	-0.0338191
CCNB1IP1	0.00883566	0.0057699	0.491847	0.0255402	0.407164
MRPL13	0.00964791	0.0057937	0.491639	0.218576	0.231394
RHOD	0.00999809	0.00579431	0.491634	0.376838	0.167316
RPS6KB2	0.00958936	0.00580748	0.491519	0.169646	0.257426
RAB17	0.00958567	0.00583871	0.491248	0.0716866	0.333519
AAGAB	0.00993813	0.00584144	0.491225	0.221319	0.230059
SNRPD2	0.00957155	0.00584318	0.49121	0.351607	0.176215
FBN2	0.00846212	0.00584784	0.491169	0.000206401	0.627434
BUB1	0.00942245	0.00584894	0.49116	0.00027285	0.618089
TGIF2	0.00978414	0.00588935	0.490811	0.181376	0.250751
C20orf196	0.00910298	0.00590199	0.490703	0.0494786	0.361776
MRPL52	0.00933475	0.00591519	0.490589	0.446477	0.144399
MAP6D1	0.00946945	0.00592592	0.490498	0.0180781	0.428746
SNAPC4	0.00964818	0.00595787	0.490225	0.29365	0.198242
RPL22L1	0.0097105	0.00596497	0.490164	0.286519	0.201135
RALGPS1	0.00921694	0.00596526	0.490162	0.000205012	0.627656
HIST2H4B	0.00997527	0.00597485	0.49008	0.0970703	0.308599
WDYHV1	0.00978558	0.00600247	0.489846	0.150256	0.269218
MCRS1	0.00927966	0.00604292	0.489505	0.0980882	0.307709
HS3ST3A1	0.00841935	0.00605433	0.489409	0.000599178	0.590055
CSMD2	0.00869424	0.0060601	0.489361	0.00109485	0.566693
ASRGL1	0.00933903	0.00606487	0.489321	0.00712425	0.481032
WRAP53	0.00959171	0.00608043	0.48919	0.522507	0.121482
C1orf35	0.00964524	0.00608072	0.489188	0.183789	0.249416
MMS19	0.00922175	0.00609879	0.489037	0.0673692	0.338414
CSE1L	0.00949698	0.00610784	0.488961	0.0789929	0.325731
LEPRE1	0.00919737	0.00611549	0.488898	0.00538964	0.495272
RPLP1	0.00899179	0.00612006	0.48886	0.308247	0.192457
ISG15	0.0090591	0.00613818	0.488709	0.00134716	0.558238
ARF3	0.00952856	0.00616706	0.48847	0.136065	0.278563
PLK1	0.0094176	0.00618586	0.488315	0.00193652	0.542886
IFITM1	0.00902722	0.00618747	0.488301	0.0652877	0.340861
SSNA1	0.00955078	0.00619451	0.488243	0.761402	0.0578485
HKR1	0.00848192	0.0062153	0.488072	0.146784	0.271443
CCNE1	0.00918607	0.0062521	0.487771	0.00284676	0.525754
POLE2	0.00919018	0.00625558	0.487742	0.000247216	0.621426
LIPC	0.00853928	0.00626088	0.487699	0.0403187	0.37646
IFT46	0.0094783	0.00627166	0.487611	0.349141	-0.177105
C6orf136	0.00888742	0.00627529	0.487582	0.0766376	0.328179
SQLE	0.00917914	0.00627564	0.487579	0.0315096	0.39337
NRSN2	0.00904918	0.00628435	0.487508	0.173883	0.254978
ZNF497	0.0089167	0.00629127	0.487451	0.0117101	0.454111
LRRC14	0.00931016	0.00630449	0.487344	0.108715	0.29881
CCDC104	0.00874993	0.00631641	0.487247	0.251033	0.216264
GPX8	0.00922074	0.00632994	0.487138	0.00449992	0.504172
ZNF251	0.00930835	0.00634989	0.486977	0.0290773	0.39871
TTLL4	0.00910677	0.0063537	0.486946	0.0114808	0.455223
ZNF322	0.00844026	0.00636529	0.486853	0.00938734	0.466348
NCAPH	0.00906898	0.00638625	0.486684	8.95998e-05	0.653688
MRPS26	0.00945569	0.00639267	0.486633	0.336365	0.181778
STYXL1	0.00981019	0.00640011	0.486573	0.11929	0.290577
FDXR	0.00975615	0.00641087	0.486487	0.212711	0.234286
TANC2	0.00890204	0.00641397	0.486462	0.00620557	0.488152
EEF1D	0.00920911	0.00642931	0.48634	0.749841	0.0607409
ADC	0.00856083	0.00644038	0.486251	0.0102236	0.461675
PABPC1L	0.0084466	0.00644085	0.486248	0.000879808	0.57537
PRR5.ARHGAP8	0.00915949	0.00650745	0.485719	0.0281811	0.400769
PIK3R2	0.00913157	0.00651054	0.485695	0.00836258	0.472578
NWD1	0.00852609	0.00654499	0.485423	0.0988569	0.307042
C9orf37	0.00961561	0.00655406	0.485352	0.276829	0.20514
C6orf48	0.00751322	0.00655512	0.485344	0.0316144	0.393147
CENPO	0.00936751	0.00660916	0.484921	0.0129654	0.448326
ALDH1B1	0.00885871	0.00662947	0.484763	0.245086	0.218934
MARVELD1	0.0087227	0.00663676	0.484706	0.0301724	0.396262
USH1G	0.00858185	0.00665299	0.48458	0.793313	0.0499282
WDR53	0.00950872	0.00667139	0.484438	0.0331117	0.390032
TMEM216	0.00919173	0.0066834	0.484345	0.0953082	0.310157
CNGB3	0.00906993	0.00670045	0.484214	0.000249657	0.621095
CEP164	0.00946769	0.00670106	0.484209	0.374268	0.168206
C1orf85	0.00930228	0.0067079	0.484156	0.0138455	0.444543
DDX25	0.0084555	0.00671027	0.484138	0.129999	0.282775
ARL3	0.0093305	0.00672943	0.483991	0.0341042	0.38803
MEN1	0.00921529	0.00675338	0.483807	0.0328943	0.390477
NIF3L1	0.00950154	0.00676653	0.483707	0.168884	0.257871
OSBPL10	0.00869785	0.00677959	0.483607	0.00749728	0.478362
AJUBA	0.0090767	0.00680423	0.483419	0.0192364	0.424964
NME1	0.00947497	0.00681501	0.483337	0.274705	0.20603
PGAP2	0.00933902	0.00681723	0.48332	0.123788	0.28724
RALY	0.00953227	0.00682256	0.48328	0.248544	0.217377
NEURL1	0.00870396	0.00683241	0.483205	0.000247216	0.621426
APRT	0.00932707	0.0068361	0.483177	0.8601	-0.0335966
SIGIRR	0.00934596	0.00686317	0.482972	0.00513118	0.497719
RNF181	0.00938806	0.00688678	0.482795	0.444356	0.145066
CHEK1	0.00947698	0.00691708	0.482567	0.0187523	0.426521
SNX32	0.00965606	0.00692647	0.482496	0.098344	0.307487
DPF2	0.00886307	0.00695756	0.482264	0.171178	0.256536
PAAF1	0.00911089	0.00697825	0.48211	0.307678	0.19268
CCDC113	0.00890007	0.00699065	0.482017	0.118406	0.291245
QPCT	0.008181	0.00699982	0.481949	0.00290274	0.524864
VARS	0.0091766	0.00700301	0.481926	0.199591	0.240961
VANGL1	0.00915813	0.00701003	0.481874	0.00027285	0.618089
HJURP	0.0092399	0.00703115	0.481717	5.90724e-05	0.665925
AGAP3	0.00955506	0.0070327	0.481706	0.390495	0.162643
CRABP2	0.00899083	0.00706762	0.481448	0.000731953	0.58249
IL10RB	0.00931796	0.00708391	0.481328	0.141351	0.275003
DCAF11	0.00940705	0.00710701	0.481159	0.0142221	0.442986
MICALL2	0.00902203	0.00719099	0.480546	0.0306812	0.39515
SNRPD3	0.00944802	0.00719232	0.480537	0.215856	0.232729
CABYR	0.00933679	0.00719911	0.480487	0.00846765	0.47191
CHAF1B	0.00960441	0.00721502	0.480372	0.154499	0.266548
SUMF2	0.00911154	0.00722954	0.480267	0.372348	0.168873
B9D2	0.00932699	0.00724059	0.480187	0.134121	0.279898
SCAMP5	0.00904806	0.00724357	0.480166	0.00085511	0.576482
MIF	0.00958686	0.00724754	0.480137	0.351607	0.176215
MED12L	0.00841858	0.00725609	0.480075	0.0304768	0.395595
C19orf53	0.0082406	0.0072754	0.479937	0.428969	0.149961
C2CD3	0.0090309	0.00728743	0.47985	0.0384396	0.379798
TNNT1	0.00945759	0.00730939	0.479693	0.0863937	0.318389
FKBP4	0.00959925	0.00731397	0.47966	0.265795	0.209812
FAM102A	0.00891426	0.00733859	0.479484	0.00325894	0.519524
TMEM251	0.0094456	0.00734532	0.479436	0.00648116	0.485927
ISYNA1	0.00932462	0.00735593	0.479361	0.0666064	0.339304
DCTN5	0.00956915	0.00737098	0.479254	0.345461	0.17844
PIWIL1	0.00960118	0.00739446	0.479087	8.06665e-06	0.717609
ZNF821	0.00919561	0.00739878	0.479056	0.161393	0.262321
PANX2	0.00937438	0.00743972	0.478767	0.402425	0.158638
ABRACL	0.00946141	0.00744184	0.478752	0.00135443	0.558015
CDK2AP2	0.00946661	0.00745318	0.478672	0.871122	0.0309267
SH3D21	0.00907392	0.0074748	0.47852	0.000643397	0.587385
FUT8	0.00863997	0.00748504	0.478448	0.000165848	0.634553
C11orf84	0.00904872	0.00749649	0.478368	0.287064	0.200912
ABCA13	0.00906367	0.00750805	0.478287	0.00950316	0.46568
NUP62	0.00913945	0.00753462	0.478101	0.0440228	0.37023
C20orf195	0.00865889	0.00754747	0.478012	0.605518	0.0982421
NMU	0.00935535	0.00755853	0.477935	0.00140545	0.556483
BORA	0.00920918	0.00757077	0.47785	0.000445096	0.600957
SRPK1	0.00861775	0.00761137	0.477568	0.0180118	0.428969
SMUG1	0.0094902	0.00762146	0.477499	0.527892	0.119924
XPR1	0.00873783	0.00763021	0.477438	0.0509999	0.359551
ADAM8	0.0089202	0.00763397	0.477412	0.0172318	0.431639
SLC7A11	0.00899477	0.00763971	0.477373	0.00703349	0.4817
CST2	0.00802064	0.00764705	0.477322	0.0714858	0.333741
CYP2S1	0.00893205	0.00765313	0.47728	0.0231657	0.413394
SFRP2	0.00761952	0.0076687	0.477173	0.00200723	0.541328
TMSB10	0.00908804	0.00768008	0.477095	0.0289794	0.398932
NARFL	0.0093155	0.00769866	0.476968	0.722488	0.0676382
HLA.DOA	0.00813583	0.00769931	0.476963	0.00353346	0.515741
CEP85	0.00940681	0.00772239	0.476805	0.101452	0.304817
NTF3	0.00842062	0.00772567	0.476783	0.027262	0.402937
KAT7	0.00891255	0.00773468	0.476721	0.291995	0.19891
MROH2A	0.0087104	0.00774178	0.476673	0.0353694	0.385544
PCNA	0.00910883	0.00775429	0.476588	0.0133736	0.446546
RAD9A	0.00920831	0.0077684	0.476492	0.0451296	0.36845
E2F7	0.00913069	0.00777707	0.476433	0.000780111	0.580042
GLB1	0.00891857	0.00780683	0.476231	0.000585044	0.590944
MTBP	0.00879877	0.00782021	0.47614	0.00503985	0.498609
PTGES2	0.00930864	0.00783519	0.476039	0.524812	0.120814
SLC29A3	0.00932707	0.00783894	0.476014	0.00171021	0.548226
FAM20A	0.00870501	0.00784255	0.47599	0.11929	0.290577
MAP7D2	0.00921975	0.00788847	0.475681	0.16436	0.260541
RCC1	0.00957394	0.00789467	0.475639	0.195345	0.243186
RAC3	0.00978371	0.00791049	0.475533	0.801798	0.0478362
DYRK4	0.00901543	0.00791227	0.475521	0.00515423	0.497497
MRPL21	0.00904425	0.0079165	0.475493	0.559961	0.110802
ASNA1	0.00896399	0.00792394	0.475443	0.0724941	0.332629
CAMK1G	0.00861997	0.00794336	0.475314	0.00148911	0.554072
IRAK1	0.00921993	0.00794943	0.475273	0.170794	0.256758
KATNB1	0.00897496	0.00797678	0.475091	0.284347	0.202025
COL6A5	0.0082851	0.00801658	0.474827	0.00025516	0.62036
CRMP1	0.0086436	0.00801839	0.474815	0.113769	0.294805
SLC6A9	0.00940359	0.00802394	0.474778	0.02811	0.400934
GNPDA1	0.0092404	0.00805006	0.474606	0.00857382	0.471243
TBX19	0.00863503	0.00806214	0.474526	0.00477415	0.501279
SDF2L1	0.00896436	0.00807316	0.474454	0.169646	0.257426
GRIK3	0.00837059	0.00807729	0.474427	0.00846765	0.47191
ZNHIT2	0.00916576	0.00811421	0.474184	0.0562843	0.352208
PCDHGA10	0.00891486	0.00814936	0.473954	0.504249	0.126822
ZNF556	0.00884504	0.0081507	0.473946	0.0346439	0.38696
HSH2D	0.0088184	0.00817576	0.473782	0.000557652	0.592724
RANGAP1	0.00957503	0.00818463	0.473724	0.511818	0.124597
IMPDH2	0.00890941	0.00824009	0.473365	0.673938	0.0800979
DNASE2	0.00931539	0.00825654	0.473259	0.00479583	0.501057
PPP2R1A	0.00935435	0.00828088	0.473102	0.450025	0.143286
KCTD1	0.00863007	0.00828115	0.4731	0.0539922	0.355323
TOR4A	0.00930551	0.00828245	0.473091	0.0342159	0.387807
GPR37L1	0.00930017	0.00829263	0.473026	0.0513085	0.359106
GPRIN2	0.00865609	0.00837228	0.472516	0.000821555	0.57804
NUSAP1	0.00926939	0.00839627	0.472363	0.000106075	0.64857
CENPA	0.00921827	0.00841926	0.472217	0.00012254	0.644121
SCARF2	0.00815969	0.00845343	0.472	0.0371069	0.382245
ADAMDEC1	0.00861167	0.00847688	0.471852	0.000165848	0.634553
LAMP3	0.00847699	0.00848461	0.471803	0.000185142	0.630993
CERS1	0.0085337	0.00850636	0.471666	0.0389337	0.378908
RCN3	0.00849034	0.00850904	0.471649	0.0163574	0.434754
HN1L	0.00969878	0.00853424	0.471491	0.6972	0.0740906
KRT6B	0.00838524	0.00854958	0.471394	0.472532	0.136334
ALKBH4	0.00913272	0.00855245	0.471376	0.043886	0.370453
DYX1C1	0.00841589	0.00856079	0.471324	0.00138386	0.557125
MUC15	0.00861879	0.00857307	0.471247	0.0109418	0.457913
ZHX1.C8ORF76	0.00944013	0.00861285	0.470999	0.304274	0.194015
CLEC11A	0.00815882	0.00861381	0.470993	0.00989794	0.463455
RFWD3	0.00862046	0.00861381	0.470993	0.0151151	0.439426
THADA	0.00968739	0.00864101	0.470824	0.273119	0.206697
P4HA3	0.00849049	0.00865127	0.47076	0.00197665	0.541996
MYCN	0.00903031	0.00865516	0.470736	0.054315	0.354878
PIH1D1	0.00959203	0.00866636	0.470667	0.849104	-0.0362665
SGOL1	0.00917026	0.00868538	0.470549	0.00098495	0.57092
MYB	0.00909059	0.00869248	0.470505	0.00853831	0.471465
VPS72	0.00936173	0.0087026	0.470442	0.829017	0.0411614
FAT2	0.00891427	0.00870597	0.470422	0.00568419	0.492602
SLFN13	0.00846363	0.00871327	0.470376	2.81631e-05	0.686394
2012-09-07	0.00821513	0.0087237	0.470312	0.00425885	0.506842
ALPPL2	0.00986143	0.00874202	0.470199	0.0495342	0.361693
RPS19	0.00913714	0.00874746	0.470166	0.0996302	0.306374
BLOC1S3	0.00895172	0.00883207	0.469648	0.0618109	0.345088
NOG	0.00791449	0.00886489	0.469448	0.170794	0.256758
ATP8A2	0.00878334	0.00886504	0.469447	0.0159342	0.436311
CLDN22	0.00862533	0.00889205	0.469283	0.0457942	0.367398
SMARCB1	0.00942985	0.00889905	0.469241	0.25809	0.213149
PNPO	0.00880573	0.00891528	0.469142	0.579137	0.105462
SND1	0.00930996	0.00891939	0.469117	0.229218	0.226277
RBM10	0.00936382	0.00894646	0.468954	0.536408	0.117477
PCYOX1L	0.00907355	0.00895903	0.468878	0.000879808	0.57537
ZNF525	0.00876344	0.00902954	0.468455	0.00263205	0.529314
DDX39A	0.00940271	0.00903395	0.468428	0.163987	0.260763
C11orf24	0.0084533	0.00903433	0.468426	0.0147189	0.440983
EXO5	0.00827975	0.00903837	0.468402	0.000544384	0.593614
GPR141	0.00843422	0.00904484	0.468363	0.00765752	0.47725
SEMA5B	0.00880267	0.0090864	0.468115	0.00470963	0.501947
SMPD2	0.00914733	0.00909592	0.468059	0.485574	0.132384
DCLRE1B	0.00893566	0.00909811	0.468046	0.00151525	0.553343
FCGBP	0.00857652	0.00912606	0.467879	0.00942582	0.466125
PCYT1B	0.00879214	0.00912852	0.467865	0.0136867	0.445211
PNKP	0.00917766	0.00914279	0.46778	0.359693	0.173323
DNMT3B	0.00872539	0.00915273	0.467721	0.0119433	0.452998
WDHD1	0.00888665	0.0091545	0.467711	0.00691401	0.48259
PIF1	0.00930559	0.00916233	0.467665	0.00534184	0.495717
FGF18	0.00873753	0.00916321	0.467659	0.0803009	0.324396
HDGF	0.00897179	0.00917739	0.467576	0.312828	0.190677
CPNE1	0.00879593	0.00921956	0.467327	0.0143861	0.442318
FAM69C	0.0076137	0.00926323	0.467071	0.0358115	0.384692
CLHC1	0.00790473	0.00926493	0.467061	0.00531807	0.495939
CXCL17	0.00894038	0.00932671	0.4667	0.00916157	0.467669
BIRC5	0.00908446	0.00934097	0.466617	0.000574636	0.591612
RPL27A	0.00784279	0.00935964	0.466508	0.219031	0.231171
CTPS2	0.00916719	0.00937231	0.466435	0.137701	0.27745
CEP55	0.00895007	0.00937788	0.466403	0.000118224	0.645233
TPM4	0.00846492	0.00938019	0.466389	0.0399371	0.377128
KIAA0391	0.00854807	0.00938649	0.466353	0.0656624	0.340416
THAP8	0.00936752	0.00947497	0.465842	0.0714858	0.333741
BLM	0.00865871	0.00948573	0.46578	0.00445895	0.504617
RNF113A	0.0087205	0.00948584	0.46578	0.0834176	0.321282
PCGF1	0.00838571	0.00950237	0.465685	0.409816	0.156191
PPIL3	0.00814586	0.00950575	0.465665	0.00141385	0.556235
MTFP1	0.00889338	0.00951693	0.465601	0.129663	0.283013
HIST2H4A	0.00957432	0.0095667	0.465317	0.239234	0.221604
GCK	0.00817334	0.00958066	0.465237	0.511818	0.124597
PCGF2	0.00894409	0.0095871	0.465201	0.231576	0.225164
REXO4	0.00944241	0.00960508	0.465099	0.679083	0.0787629
COL5A1	0.00843009	0.0096057	0.465095	0.000957685	0.572032
SETDB1	0.00888198	0.00964208	0.464889	0.0320365	0.392257
DOLPP1	0.0094146	0.00965005	0.464843	0.407793	0.156858
DMBX1	0.00867475	0.00965494	0.464816	0.0156129	0.437517
OGFOD3	0.00937219	0.00966048	0.464784	0.622482	-0.09367
ZNF687	0.00891744	0.00966549	0.464756	0.00464586	0.502614
TMEM161A	0.00926748	0.00968968	0.46462	0.790972	0.0505062
ZNF625	0.00896102	0.00970198	0.46455	0.00199699	0.541551
SPDL1	0.00905706	0.00971128	0.464498	0.000531394	0.594504
ZNF564	0.00870673	0.00971904	0.464454	0.00050316	0.596507
CD207	0.00892909	0.00971904	0.464454	0.282726	0.202692
POLR2I	0.00880494	0.00972812	0.464403	0.670516	0.0809879
DLGAP5	0.00898029	0.00982479	0.463862	0.000120797	0.644566
MIEF2	0.00866787	0.00985865	0.463673	0.0571212	0.351096
NCAPD2	0.0087261	0.00987072	0.463606	0.000253834	0.620536
KIF23	0.0090438	0.00988777	0.463512	0.000139263	0.640116
ISLR	0.00784278	0.00992776	0.46329	0.046401	0.366448
VTCN1	0.00889779	0.00998925	0.462951	0.0135817	0.445656
TTC9C	0.00865115	0.00999994	0.462893	0.0121326	0.452108
DEDD2	0.0089351	0.0100053	0.462863	0.0300715	0.396485
TEN1	0.00904413	0.0100396	0.462675	0.885855	0.0273668
UBE2O	0.00904186	0.0100473	0.462633	0.699802	0.0734231
EXO1	0.00869244	0.0100635	0.462544	0.00022524	0.624541
ABHD8	0.00955082	0.0100848	0.462428	0.0980882	0.307709
S100A16	0.0090047	0.0101369	0.462144	0.210929	0.235176
PRDX4	0.00868711	0.0101744	0.461941	0.371071	0.169318
MGAT4B	0.00935111	0.0102159	0.461717	0.0948092	0.310602
AGMAT	0.00913414	0.0102264	0.46166	0.0160542	0.435866
LIMS3	0.00868295	0.010229	0.461647	0.00490336	0.499966
NSUN7	0.00830791	0.0102409	0.461582	0.00875328	0.47013
SLC9A2	0.00864267	0.0102416	0.461579	0.00239456	0.533556
KIF18A	0.00864979	0.0103001	0.461264	0.0162964	0.434976
PPP4C	0.0092179	0.0103186	0.461165	0.22086	0.230281
ESYT3	0.00848306	0.0103239	0.461137	0.0106861	0.459228
KIAA0907	0.0084747	0.0103838	0.460818	0.0027242	0.527756
KCNK2	0.00782775	0.0103847	0.460813	0.000990484	0.570698
CD1E	0.00813441	0.0103857	0.460808	0.000459029	0.599844
YIPF3	0.00820755	0.0103969	0.460748	0.418648	0.153298
UXT	0.00881654	0.0104073	0.460692	0.708499	0.0711981
SHANK2	0.00868084	0.0104387	0.460526	0.0100597	0.462565
RPL35	0.00901246	0.0104443	0.460496	0.597782	0.100345
NUTF2	0.00903801	0.0104652	0.460385	0.642536	0.0883302
CNIH2	0.00889846	0.0104685	0.460368	0.0333302	0.389587
SS18L1	0.00782374	0.0104815	0.460299	0.0488802	0.362665
CCDC151	0.00869313	0.0105229	0.460081	0.107615	0.2997
SOWAHD	0.00897508	0.01055	0.459939	0.00203821	0.540661
LSM7	0.00826595	0.0105625	0.459873	0.352225	0.175993
MMP9	0.00848553	0.0105866	0.459747	0.0014063	0.556458
IGLL1	0.0078318	0.0105871	0.459744	0.0223464	0.415665
PSME2	0.00894636	0.0106023	0.459665	0.0380724	0.380465
MAD1L1	0.00906215	0.0106121	0.459614	0.0825178	0.322172
SHKBP1	0.00920123	0.010655	0.45939	0.0282056	0.400712
TMEM223	0.00895982	0.0106658	0.459334	0.108715	0.29881
MARK2	0.00844102	0.0107008	0.459152	0.0508461	0.359773
EEFSEC	0.00877197	0.010731	0.458995	0.107342	0.299922
FKBP1B	0.0083147	0.010738	0.458959	0.192827	0.244521
KDM3A	0.00804273	0.010762	0.458835	0.00145213	0.555123
CHCHD6	0.00895231	0.0107784	0.45875	0.00275103	0.527311
COL1A1	0.00812725	0.010808	0.458598	0.000617267	0.588942
RIPK4	0.00842236	0.0108284	0.458493	0.0193064	0.424741
WDR24	0.00912609	0.0108536	0.458364	0.748066	0.0611859
RBM42	0.00912008	0.0108659	0.4583	0.853682	0.0351541
LIN28B	0.00813772	0.0108771	0.458243	0.019327	0.424676
TMEM169	0.00848785	0.0108808	0.458224	0.0104317	0.460563
BNIPL	0.00850286	0.0108915	0.45817	0.0108153	0.45856
ZNF682	0.00836816	0.0109035	0.458108	0.00368667	0.513739
MRPL14	0.00882369	0.0109198	0.458025	0.380064	0.166203
FBXO2	0.00870119	0.010947	0.457886	0.548911	0.113917
CXCL11	0.00789484	0.0109858	0.457689	0.00280539	0.526421
HDAC1	0.00904062	0.0110036	0.457599	0.0159941	0.436089
PIGQ	0.00930162	0.0110496	0.457366	0.797283	-0.0489487
PPIE	0.00871113	0.0110519	0.457354	0.322703	0.186895
PRR15L	0.00851942	0.0110812	0.457206	0.0625305	0.344198
EMC9	0.0096624	0.0110976	0.457124	0.208715	0.236289
KERA	0.00748147	0.0111429	0.456896	0.00062398	0.588536
RPS24	0.00824092	0.0111474	0.456874	0.222238	0.229614
MED22	0.00916957	0.0111545	0.456838	0.127786	0.284348
IGF2BP1	0.00797107	0.0111661	0.45678	0.0504469	0.360353
RPS10.NUDT3	0.00837471	0.0111673	0.456774	0.180178	0.251418
CEL	0.00913816	0.0111806	0.456708	0.0829667	0.321727
BCAT1	0.00809134	0.0111857	0.456682	0.00298848	0.523529
PAQR7	0.00839504	0.0111873	0.456674	0.123484	0.287462
WDR46	0.00880752	0.0112228	0.456497	0.332767	0.183113
ANXA13	0.00784198	0.0112294	0.456464	0.100668	0.305484
ANKRD2	0.00867944	0.0113457	0.455887	0.00497227	0.499277
CAD	0.00852183	0.0113941	0.455648	0.000900013	0.57448
FOXF2	0.00768011	0.0114088	0.455576	0.0222839	0.415842
ZNF440	0.00882925	0.0114491	0.455378	0.00114423	0.564913
ENTPD6	0.00860558	0.0114631	0.45531	0.0365135	0.383357
PAK4	0.00876095	0.0114668	0.455291	0.0327861	0.3907
NAT9	0.00889337	0.0115018	0.455121	0.119883	0.290132
TLE6	0.00735165	0.01153	0.454983	0.101977	0.304372
SLC6A15	0.00846773	0.0115487	0.454892	0.0970312	0.308634
NELFE	0.00860653	0.0115497	0.454887	0.398426	0.159973
C9orf43	0.00884101	0.0115577	0.454848	0.359067	0.173545
C8orf76	0.00900108	0.0115745	0.454766	0.114054	0.294582
VWA9	0.00894687	0.0115768	0.454755	0.394449	0.161308
HEATR6	0.00852018	0.011598	0.454652	0.0188208	0.426299
RYR1	0.00844095	0.0116006	0.454639	5.63833e-05	0.66726
VPS33B	0.00872127	0.01163	0.454497	0.0359278	0.38447
DIO2	0.00842446	0.0116463	0.454418	0.105441	0.30148
PPIB	0.0083177	0.011648	0.45441	0.852766	0.0353766
ZDHHC16	0.0093174	0.0116668	0.454319	0.450025	0.143286
SALL2	0.00867053	0.0117029	0.454145	0.020163	0.422071
[truncated: 13,445 more rows]

## Sheet: Table S19
Supplementary Table 19: Gene Ontology enrichment analysis of tissue modulus associated genes - PLSR all genes vs tissue modulus - loading weight > |0.007|
Enriched Gene Ontologies were identified by a modified Fisher’s exact test using the web-based tool PANTHER (version 10)(Mi et. al. 2016). Enrichment p-values were calculated with a modified Fisher's exact test and Bonferroni multiple testing correction. GO terms illustrated in supplemental figure 2D are highlighted.
GO biological process complete	# genes in GO term	# genes observed	# genes expected	fold enrichment	p-value
response to mechanical stimulus (GO:0009612)	199	119	68.64	1.73	0.000148
cellular response to acid chemical (GO:0071229)	170	99	58.64	1.69	0.00674
renal system development (GO:0072001)	273	154	94.16	1.64	5.92e-05
kidney development (GO:0001822)	257	145	88.64	1.64	0.000157
urogenital system development (GO:0001655)	308	171	106.23	1.61	2.7e-05
mitotic nuclear division (GO:0007067)	335	182	115.55	1.58	3.98e-05
negative regulation of kinase activity (GO:0033673)	220	120	75.88	1.58	0.0122
regulation of epithelial cell proliferation (GO:0050678)	278	151	95.89	1.57	0.000772
negative regulation of protein kinase activity (GO:0006469)	203	110	70.02	1.57	0.0424
negative regulation of protein phosphorylation (GO:0001933)	345	186	118.99	1.56	4.66e-05
regulation of small GTPase mediated signal transduction (GO:0051056)	285	153	98.3	1.56	0.00125
negative regulation of phosphorylation (GO:0042326)	382	204	131.76	1.55	1.81e-05
microtubule cytoskeleton organization (GO:0000226)	343	183	118.3	1.55	0.000125
response to hypoxia (GO:0001666)	270	144	93.13	1.55	0.00403
response to decreased oxygen levels (GO:0036293)	275	146	94.85	1.54	0.00432
response to oxygen levels (GO:0070482)	296	156	102.09	1.53	0.00275
vasculature development (GO:0001944)	470	247	162.11	1.52	1.65e-06
blood vessel development (GO:0001568)	446	233	153.83	1.51	8.71e-06
developmental growth (GO:0048589)	326	170	112.44	1.51	0.00162
cellular response to abiotic stimulus (GO:0071214)	255	132	87.95	1.5	0.0483
tube morphogenesis (GO:0035239)	356	183	122.79	1.49	0.00142
positive regulation of cell migration (GO:0030335)	347	178	119.68	1.49	0.00236
epithelial tube morphogenesis (GO:0060562)	316	162	108.99	1.49	0.00806
response to acid chemical (GO:0001101)	304	155	104.85	1.48	0.0181
muscle organ development (GO:0007517)	283	144	97.61	1.48	0.0446
regulation of cell migration (GO:0030334)	599	303	206.6	1.47	8.3e-07
regulation of GTPase activity (GO:0043087)	542	274	186.94	1.47	6.83e-06
negative regulation of intracellular signal transduction (GO:1902532)	400	203	137.96	1.47	0.000762
blood vessel morphogenesis (GO:0048514)	376	191	129.69	1.47	0.00169
cellular response to external stimulus (GO:0071496)	317	161	109.34	1.47	0.0145
circulatory system development (GO:0072359)	779	391	268.69	1.46	4.27e-09
cardiovascular system development (GO:0072358)	779	391	268.69	1.46	4.27e-09
microtubule-based process (GO:0007017)	509	256	175.56	1.46	3.75e-05
endomembrane system organization (GO:0010256)	432	217	149	1.46	0.00059
regulation of cytoplasmic transport (GO:1903649)	432	217	149	1.46	0.00059
regulation of protein serine/threonine kinase activity (GO:0071900)	430	216	148.31	1.46	0.000631
growth (GO:0040007)	407	205	140.38	1.46	0.00111
regulation of vesicle-mediated transport (GO:0060627)	397	200	136.93	1.46	0.00154
positive regulation of cellular component movement (GO:0051272)	365	184	125.89	1.46	0.00445
positive regulation of cell motility (GO:2000147)	357	180	123.13	1.46	0.0058
cytoskeleton organization (GO:0007010)	848	425	292.49	1.45	4.95e-10
mitotic cell cycle (GO:0000278)	791	396	272.83	1.45	4.22e-09
positive regulation of GTPase activity (GO:0043547)	492	246	169.7	1.45	0.000119
morphogenesis of an epithelium (GO:0002009)	439	220	151.42	1.45	0.00057
positive regulation of nervous system development (GO:0051962)	414	207	142.79	1.45	0.00159
forebrain development (GO:0030900)	355	178	122.44	1.45	0.00923
positive regulation of neurogenesis (GO:0050769)	354	177	122.1	1.45	0.0116
cellular response to growth factor stimulus (GO:0071363)	733	364	252.82	1.44	9.81e-08
positive regulation of locomotion (GO:0040017)	374	186	129	1.44	0.00885
extracellular matrix organization (GO:0030198)	365	181	125.89	1.44	0.0145
response to growth factor (GO:0070848)	754	373	260.06	1.43	8.6e-08
negative regulation of phosphorus metabolic process (GO:0010563)	503	248	173.49	1.43	0.000319
negative regulation of phosphate metabolic process (GO:0045936)	503	248	173.49	1.43	0.000319
nuclear division (GO:0000280)	445	220	153.49	1.43	0.0015
organelle localization (GO:0051640)	368	182	126.93	1.43	0.0159
extracellular structure organization (GO:0043062)	366	181	126.24	1.43	0.017
positive regulation of cellular component biogenesis (GO:0044089)	357	176	123.13	1.43	0.0276
regulation of homeostatic process (GO:0032844)	355	175	122.44	1.43	0.0295
regulation of cellular component movement (GO:0051270)	709	347	244.54	1.42	1.48e-06
regulation of cell motility (GO:2000145)	634	311	218.67	1.42	1.04e-05
negative regulation of cell proliferation (GO:0008285)	633	309	218.33	1.42	1.88e-05
tissue morphogenesis (GO:0048729)	576	282	198.67	1.42	7.2e-05
cell division (GO:0051301)	466	229	160.73	1.42	0.00132
organelle fission (GO:0048285)	472	231	162.8	1.42	0.00157
muscle structure development (GO:0061061)	462	226	159.35	1.42	0.00218
mitotic cell cycle process (GO:1903047)	720	351	248.34	1.41	1.78e-06
regulation of nervous system development (GO:0051960)	693	336	239.02	1.41	7.6e-06
regulation of neurogenesis (GO:0050767)	600	292	206.95	1.41	6.77e-05
tube development (GO:0035295)	587	285	202.46	1.41	0.000125
head development (GO:0060322)	699	337	241.09	1.4	1.28e-05
heart development (GO:0007507)	441	213	152.11	1.4	0.0109
positive regulation of cell development (GO:0010720)	446	215	153.83	1.4	0.011
neurotrophin signaling pathway (GO:0038179)	397	192	136.93	1.4	0.0323
regulation of cytoskeleton organization (GO:0051493)	401	193	138.31	1.4	0.0405
neurotrophin TRK receptor signaling pathway (GO:0048011)	394	190	135.9	1.4	0.0427
regulation of locomotion (GO:0040012)	700	336	241.44	1.39	2.11e-05
brain development (GO:0007420)	661	317	227.99	1.39	6.43e-05
regulation of intracellular transport (GO:0032386)	564	271	194.53	1.39	0.000656
embryonic organ development (GO:0048568)	433	208	149.35	1.39	0.0202
cell cycle (GO:0007049)	1322	627	455.97	1.38	1.71e-11
positive regulation of developmental process (GO:0051094)	1104	527	380.78	1.38	1.29e-09
cellular response to endogenous stimulus (GO:0071495)	1119	531	385.96	1.38	2.63e-09
membrane organization (GO:0061024)	877	417	302.49	1.38	7.98e-07
regulation of anatomical structure morphogenesis (GO:0022603)	857	408	295.59	1.38	1.1e-06
positive regulation of hydrolase activity (GO:0051345)	815	388	281.1	1.38	3.15e-06
small GTPase mediated signal transduction (GO:0007264)	778	370	268.34	1.38	9.05e-06
regulation of growth (GO:0040008)	615	293	212.12	1.38	0.000415
regulation of neuron differentiation (GO:0045664)	484	231	166.94	1.38	0.00908
regulation of cell projection organization (GO:0031344)	459	219	158.31	1.38	0.0173
enzyme linked receptor protein signaling pathway (GO:0007167)	1004	473	346.29	1.37	1.49e-07
central nervous system development (GO:0007417)	870	412	300.07	1.37	1.69e-06
positive regulation of cell differentiation (GO:0045597)	799	377	275.58	1.37	1.49e-05
transmembrane receptor protein tyrosine kinase signaling pathway (GO:0007169)	783	370	270.07	1.37	1.8e-05
intracellular signal transduction (GO:0035556)	1816	853	626.36	1.36	7.63e-16
cellular response to stress (GO:0033554)	1718	806	592.56	1.36	1.24e-14
response to abiotic stimulus (GO:0009628)	1119	525	385.96	1.36	2.02e-08
cell cycle process (GO:0022402)	1068	502	368.37	1.36	4.82e-08
anatomical structure formation involved in morphogenesis (GO:0048646)	974	457	335.94	1.36	5.65e-07
positive regulation of transport (GO:0051050)	866	406	298.69	1.36	7.36e-06
regulation of kinase activity (GO:0043549)	872	408	300.76	1.36	8.4e-06
peptidyl-amino acid modification (GO:0018193)	864	404	298	1.36	1.09e-05
regulation of protein kinase activity (GO:0045859)	825	386	284.55	1.36	2.39e-05
response to lipid (GO:0033993)	772	362	266.27	1.36	5.94e-05
regulation of cell development (GO:0060284)	763	357	263.17	1.36	9.39e-05
single-organism membrane organization (GO:0044802)	715	336	246.61	1.36	0.000167
epithelial cell differentiation (GO:0030855)	510	240	175.91	1.36	0.0151
regulation of cell morphogenesis (GO:0022604)	477	224	164.52	1.36	0.0373
regulation of cellular localization (GO:0060341)	1175	546	405.27	1.35	3.14e-08
cellular response to oxygen-containing compound (GO:1901701)	924	430	318.7	1.35	5.64e-06
response to wounding (GO:0009611)	738	343	254.55	1.35	0.000343
wound healing (GO:0042060)	658	306	226.95	1.35	0.00173
regulation of cellular component biogenesis (GO:0044087)	653	303	225.23	1.35	0.00238
cellular response to organonitrogen compound (GO:0071417)	610	284	210.4	1.35	0.00426
negative regulation of protein modification process (GO:0031400)	569	265	196.25	1.35	0.00981
regulation of cellular response to stress (GO:0080135)	729	338	251.44	1.34	0.000538
cellular response to nitrogen compound (GO:1901699)	658	305	226.95	1.34	0.00238
regulation of localization (GO:0032879)	2267	1040	781.92	1.33	3.41e-17
cellular protein localization (GO:0034613)	1138	524	392.51	1.33	3.25e-07
cellular macromolecule localization (GO:0070727)	1146	525	395.27	1.33	6.4e-07
epithelium development (GO:0060429)	989	453	341.12	1.33	1.37e-05
protein phosphorylation (GO:0006468)	944	434	325.6	1.33	1.97e-05
regulation of transferase activity (GO:0051338)	967	443	333.53	1.33	2.04e-05
cellular lipid metabolic process (GO:0044255)	880	405	303.52	1.33	6.08e-05
regulation of protein transport (GO:0051223)	724	331	249.72	1.33	0.00255
macromolecule localization (GO:0033036)	2013	916	694.31	1.32	9.71e-14
single-organism organelle organization (GO:1902589)	1970	899	679.48	1.32	1.03e-13
regulation of transport (GO:0051049)	1715	783	591.52	1.32	1.64e-11
protein localization (GO:0008104)	1689	770	582.56	1.32	3.93e-11
response to endogenous stimulus (GO:0009719)	1545	703	532.89	1.32	1.02e-09
regulation of phosphorylation (GO:0042325)	1419	646	489.43	1.32	1.02e-08
vesicle-mediated transport (GO:0016192)	1150	524	396.65	1.32	1.41e-06
organ morphogenesis (GO:0009887)	888	405	306.28	1.32	0.000161
single-organism cellular localization (GO:1902580)	845	386	291.45	1.32	0.000295
cell migration (GO:0016477)	759	346	261.79	1.32	0.0018
regulation of body fluid levels (GO:0050878)	657	299	226.61	1.32	0.0133
embryonic morphogenesis (GO:0048598)	569	260	196.25	1.32	0.0468
regulation of cellular component organization (GO:0051128)	2160	977	745.01	1.31	3.08e-14
cellular localization (GO:0051641)	2174	982	749.84	1.31	3.54e-14
regulation of multicellular organismal development (GO:2000026)	1517	688	523.23	1.31	3.47e-09
regulation of intracellular signal transduction (GO:1902531)	1571	709	541.86	1.31	3.62e-09
regulation of cell differentiation (GO:0045595)	1489	671	513.57	1.31	2.13e-08
regulation of protein phosphorylation (GO:0001932)	1330	603	458.73	1.31	1.18e-07
cell projection organization (GO:0030030)	1172	529	404.24	1.31	4.2e-06
positive regulation of cellular component organization (GO:0051130)	1143	516	394.23	1.31	6.77e-06
regulation of protein localization (GO:0032880)	900	408	310.42	1.31	0.00027
chemical homeostasis (GO:0048878)	864	391	298	1.31	0.000621
regulation of establishment of protein localization (GO:0070201)	785	356	270.76	1.31	0.00195
regulation of MAPK cascade (GO:0043408)	771	349	265.93	1.31	0.00302
cellular response to hormone stimulus (GO:0032870)	690	311	237.99	1.31	0.018
anatomical structure morphogenesis (GO:0009653)	2341	1048	807.44	1.3	2.44e-14
nervous system development (GO:0007399)	2271	1018	783.3	1.3	5.88e-14
establishment of localization in cell (GO:0051649)	1812	811	624.98	1.3	3.3e-10
neurogenesis (GO:0022008)	1628	729	561.52	1.3	7e-09
tissue development (GO:0009888)	1601	716	552.2	1.3	1.45e-08
regulation of cell proliferation (GO:0042127)	1475	662	508.75	1.3	6.03e-08
positive regulation of multicellular organismal process (GO:0051240)	1357	608	468.05	1.3	6.08e-07
regulation of cell cycle (GO:0051726)	946	425	326.29	1.3	0.000369
regulation of cell communication (GO:0010646)	3019	1339	1041.29	1.29	2.69e-18
regulation of multicellular organismal process (GO:0051239)	2381	1060	821.24	1.29	6.87e-14
generation of neurons (GO:0048699)	1551	688	534.96	1.29	1.67e-07
response to oxygen-containing compound (GO:1901700)	1453	646	501.16	1.29	5.08e-07
cell morphogenesis (GO:0000902)	1111	493	383.2	1.29	0.000135
cell projection morphogenesis (GO:0048858)	915	407	315.59	1.29	0.00193
response to organonitrogen compound (GO:0010243)	913	406	314.9	1.29	0.00206
neuron projection development (GO:0031175)	838	373	289.04	1.29	0.00577
response to organic cyclic compound (GO:0014070)	798	355	275.24	1.29	0.0112
negative regulation of transcription from RNA polymerase II promoter (GO:0000122)	722	322	249.03	1.29	0.0279
neuron projection morphogenesis (GO:0048812)	714	317	246.27	1.29	0.0468
regulation of signaling (GO:0023051)	2870	1271	989.9	1.28	7.25e-17
cellular protein modification process (GO:0006464)	2783	1224	959.89	1.28	4.1e-15
protein modification process (GO:0036211)	2783	1224	959.89	1.28	4.1e-15
regulation of signal transduction (GO:0009966)	2538	1119	875.39	1.28	1.03e-13
regulation of developmental process (GO:0050793)	2112	930	728.45	1.28	1.39e-10
phosphorus metabolic process (GO:0006793)	2067	911	712.93	1.28	2.22e-10
cellular response to organic substance (GO:0071310)	1978	874	682.24	1.28	4.74e-10
positive regulation of molecular function (GO:0044093)	1738	767	599.46	1.28	2.63e-08
regulation of phosphorus metabolic process (GO:0051174)	1666	734	574.62	1.28	1.1e-07
regulation of phosphate metabolic process (GO:0019220)	1653	727	570.14	1.28	1.89e-07
intracellular transport (GO:0046907)	1353	598	466.67	1.28	6.54e-06
establishment of protein localization (GO:0045184)	1307	578	450.8	1.28	1.18e-05
cellular component morphogenesis (GO:0032989)	1191	524	410.79	1.28	0.000137
negative regulation of signal transduction (GO:0009968)	1039	458	358.36	1.28	0.000912
response to hormone (GO:0009725)	1019	449	351.47	1.28	0.00127
protein complex assembly (GO:0006461)	948	419	326.98	1.28	0.00244
protein complex biogenesis (GO:0070271)	948	419	326.98	1.28	0.00244
cell part morphogenesis (GO:0032990)	935	413	322.49	1.28	0.00315
single-organism catabolic process (GO:0044712)	918	405	316.63	1.28	0.00459
localization of cell (GO:0051674)	834	369	287.66	1.28	0.0113
cell motility (GO:0048870)	834	369	287.66	1.28	0.0113
cell morphogenesis involved in differentiation (GO:0000904)	830	366	286.28	1.28	0.0166
regulation of catabolic process (GO:0009894)	800	353	275.93	1.28	0.0238
regulation of biological quality (GO:0065008)	3134	1375	1080.95	1.27	2.85e-17
cellular response to chemical stimulus (GO:0070887)	2404	1051	829.17	1.27	1.14e-11
phosphate-containing compound metabolic process (GO:0006796)	2020	887	696.72	1.27	1.15e-09
regulation of protein modification process (GO:0031399)	1679	735	579.11	1.27	3.27e-07
movement of cell or subcellular component (GO:0006928)	1503	659	518.4	1.27	2.91e-06
positive regulation of catalytic activity (GO:0043085)	1476	645	509.09	1.27	7.54e-06
negative regulation of cell communication (GO:0010648)	1159	508	399.75	1.27	0.000358
negative regulation of signaling (GO:0023057)	1147	502	395.61	1.27	0.000512
lipid metabolic process (GO:0006629)	1134	495	391.13	1.27	0.000857
response to nitrogen compound (GO:1901698)	994	434	342.84	1.27	0.00515
positive regulation of protein phosphorylation (GO:0001934)	958	418	330.43	1.27	0.00884
regulation of response to external stimulus (GO:0032101)	862	378	297.31	1.27	0.0186
cellular component organization (GO:0016043)	5066	2207	1747.32	1.26	3.49e-31
organelle organization (GO:0006996)	2912	1269	1004.38	1.26	1.36e-14
positive regulation of gene expression (GO:0010628)	1664	725	573.93	1.26	1e-06
positive regulation of cell communication (GO:0010647)	1662	724	573.24	1.26	1.07e-06
positive regulation of signaling (GO:0023056)	1533	666	528.75	1.26	9.59e-06
homeostatic process (GO:0042592)	1316	572	453.9	1.26	0.000146
phosphorylation (GO:0016310)	1269	551	437.69	1.26	0.000308
single-organism intracellular transport (GO:1902582)	1168	507	402.86	1.26	0.00114
regulation of organelle organization (GO:0033043)	1097	476	378.37	1.26	0.00288
positive regulation of phosphorylation (GO:0042327)	994	433	342.84	1.26	0.00666
embryo development (GO:0009790)	967	421	333.53	1.26	0.00998
neuron development (GO:0048666)	982	426	338.7	1.26	0.0122
negative regulation of developmental process (GO:0051093)	848	369	292.49	1.26	0.0468
cellular component organization or biogenesis (GO:0071840)	5188	2232	1789.4	1.25	2.15e-28
localization (GO:0051179)	4683	2011	1615.22	1.25	5.22e-24
positive regulation of metabolic process (GO:0009893)	3529	1523	1217.19	1.25	4.56e-17
macromolecule modification (GO:0043412)	2929	1263	1010.25	1.25	4.16e-13
response to organic substance (GO:0010033)	2636	1141	909.19	1.25	7.57e-12
regulation of molecular function (GO:0065009)	2711	1165	935.06	1.25	2.47e-11
cell development (GO:0048468)	1776	765	612.56	1.25	2.11e-06
positive regulation of RNA metabolic process (GO:0051254)	1467	632	505.99	1.25	8.66e-05
positive regulation of RNA biosynthetic process (GO:1902680)	1431	615	493.57	1.25	0.000192
positive regulation of nucleic acid-templated transcription (GO:1903508)	1403	603	483.91	1.25	0.000264
positive regulation of transcription, DNA-templated (GO:0045893)	1403	603	483.91	1.25	0.000264
protein complex subunit organization (GO:0071822)	1406	604	484.95	1.25	0.000274
negative regulation of response to stimulus (GO:0048585)	1304	563	449.77	1.25	0.000442
regulation of hydrolase activity (GO:0051336)	1233	533	425.28	1.25	0.000879
protein transport (GO:0015031)	1224	529	422.17	1.25	0.00101
negative regulation of cellular macromolecule biosynthetic process (GO:2000113)	1240	535	427.69	1.25	0.00104
neuron differentiation (GO:0030182)	1168	502	402.86	1.25	0.00393
positive regulation of transcription from RNA polymerase II promoter (GO:0045944)	987	427	340.43	1.25	0.0153
negative regulation of protein metabolic process (GO:0051248)	1004	432	346.29	1.25	0.0223
positive regulation of biological process (GO:0048518)	5302	2271	1828.72	1.24	5.71e-28
positive regulation of cellular process (GO:0048522)	4586	1964	1581.77	1.24	1.26e-22
negative regulation of cellular process (GO:0048523)	4025	1722	1388.27	1.24	1.31e-18
system development (GO:0048731)	4011	1713	1383.44	1.24	3.71e-18
establishment of localization (GO:0051234)	3851	1648	1328.26	1.24	1.51e-17
regulation of response to stimulus (GO:0048583)	3555	1518	1226.16	1.24	2.59e-15
single-organism localization (GO:1902578)	3296	1414	1136.83	1.24	1.51e-14
positive regulation of macromolecule metabolic process (GO:0010604)	2741	1175	945.4	1.24	3.51e-11
organ development (GO:0048513)	2784	1186	960.24	1.24	1.34e-10
organic substance transport (GO:0071702)	1899	813	654.99	1.24	1.6e-06
cellular component assembly (GO:0022607)	1810	777	624.29	1.24	2.69e-06
regulation of cell death (GO:0010941)	1508	646	520.13	1.24	0.00013
regulation of response to stress (GO:0080134)	1415	605	488.05	1.24	0.000493
positive regulation of signal transduction (GO:0009967)	1398	597	482.19	1.24	0.000709
locomotion (GO:0040011)	1354	578	467.01	1.24	0.0012
negative regulation of macromolecule biosynthetic process (GO:0010558)	1318	564	454.59	1.24	0.00128
negative regulation of nucleic acid-templated transcription (GO:1903507)	1138	486	392.51	1.24	0.0116
negative regulation of transcription, DNA-templated (GO:0045892)	1104	472	380.78	1.24	0.0148
oxoacid metabolic process (GO:0043436)	975	418	336.29	1.24	0.0449
negative regulation of biological process (GO:0048519)	4372	1856	1507.96	1.23	3.71e-19
transport (GO:0006810)	3742	1586	1290.66	1.23	4.41e-15
cellular developmental process (GO:0048869)	3543	1504	1222.02	1.23	3.14e-14
cell differentiation (GO:0030154)	3372	1433	1163.04	1.23	1.87e-13
positive regulation of cellular metabolic process (GO:0031325)	2904	1228	1001.62	1.23	2.95e-10
regulation of protein metabolic process (GO:0051246)	2530	1071	872.63	1.23	1.53e-08
regulation of cellular protein metabolic process (GO:0032268)	2364	999	815.37	1.23	1.46e-07
regulation of catalytic activity (GO:0050790)	2244	951	773.98	1.23	2.78e-07
positive regulation of response to stimulus (GO:0048584)	2033	864	701.21	1.23	1.55e-06
positive regulation of protein metabolic process (GO:0051247)	1489	632	513.57	1.23	0.00065
regulation of programmed cell death (GO:0043067)	1424	604	491.15	1.23	0.0014
negative regulation of biosynthetic process (GO:0009890)	1401	595	483.22	1.23	0.00148
regulation of apoptotic process (GO:0042981)	1407	597	485.29	1.23	0.00158
negative regulation of cellular biosynthetic process (GO:0031327)	1381	587	476.32	1.23	0.00163
positive regulation of cellular protein metabolic process (GO:0032270)	1396	592	481.5	1.23	0.00192
negative regulation of RNA biosynthetic process (GO:1902679)	1153	490	397.68	1.23	0.0174
positive regulation of phosphorus metabolic process (GO:0010562)	1114	474	384.23	1.23	0.0227
positive regulation of phosphate metabolic process (GO:0045937)	1114	474	384.23	1.23	0.0227
positive regulation of protein modification process (GO:0031401)	1144	484	394.58	1.23	0.0314
anatomical structure development (GO:0048856)	4699	1976	1620.74	1.22	5.14e-19
multicellular organismal development (GO:0007275)	4571	1923	1576.59	1.22	2.32e-18
cellular protein metabolic process (GO:0044267)	3575	1509	1233.06	1.22	1.87e-13
response to stress (GO:0006950)	3648	1531	1258.24	1.22	6.9e-13
single-organism transport (GO:0044765)	3104	1310	1070.61	1.22	5.38e-11
negative regulation of metabolic process (GO:0009892)	2481	1040	855.73	1.22	2.95e-07
negative regulation of cellular metabolic process (GO:0031324)	2213	929	763.29	1.22	3.08e-06
cell surface receptor signaling pathway (GO:0007166)	2180	915	751.91	1.22	4.42e-06
catabolic process (GO:0009056)	1764	743	608.42	1.22	0.000136
positive regulation of nucleobase-containing compound metabolic process (GO:0045935)	1649	695	568.76	1.22	0.00038
positive regulation of macromolecule biosynthetic process (GO:0010557)	1600	671	551.86	1.22	0.00129
cellular catabolic process (GO:0044248)	1448	611	499.43	1.22	0.00226
negative regulation of nitrogen compound metabolic process (GO:0051172)	1406	593	484.95	1.22	0.00362
negative regulation of gene expression (GO:0010629)	1404	591	484.26	1.22	0.00479
negative regulation of nucleobase-containing compound metabolic process (GO:0045934)	1310	550	451.83	1.22	0.0159
negative regulation of RNA metabolic process (GO:0051253)	1193	504	411.48	1.22	0.023
single-organism developmental process (GO:0044767)	5209	2180	1796.65	1.21	6.82e-21
developmental process (GO:0032502)	5291	2210	1824.93	1.21	6.99e-21
protein metabolic process (GO:0019538)	4241	1768	1462.77	1.21	1.06e-14
negative regulation of macromolecule metabolic process (GO:0010605)	2207	920	761.22	1.21	1.4e-05
regulation of transcription from RNA polymerase II promoter (GO:0006357)	1716	718	591.87	1.21	0.000634
positive regulation of nitrogen compound metabolic process (GO:0051173)	1726	719	595.32	1.21	0.00115
single-organism metabolic process (GO:0044710)	4494	1861	1550.03	1.2	1.16e-14
macromolecular complex subunit organization (GO:0043933)	2074	855	715.35	1.2	0.000357
cellular component biogenesis (GO:0044085)	1978	818	682.24	1.2	0.000449
organic substance catabolic process (GO:1901575)	1509	626	520.47	1.2	0.0129
positive regulation of biosynthetic process (GO:0009891)	1745	718	601.87	1.19	0.00625
positive regulation of cellular biosynthetic process (GO:0031328)	1712	702	590.49	1.19	0.013
response to external stimulus (GO:0009605)	2080	844	717.42	1.18	0.00488
small molecule metabolic process (GO:0044281)	2233	899	770.19	1.17	0.00659
cellular metabolic process (GO:0044237)	8573	3417	2956.93	1.16	2.53e-24
regulation of metabolic process (GO:0019222)	6588	2644	2272.28	1.16	5.61e-17
single-organism cellular process (GO:0044763)	11415	4513	3937.17	1.15	2.06e-39
metabolic process (GO:0008152)	9928	3944	3424.29	1.15	5.56e-31
organic substance metabolic process (GO:0071704)	9008	3571	3106.97	1.15	1.6e-24
primary metabolic process (GO:0044238)	8697	3441	2999.7	1.15	3.72e-22
macromolecule metabolic process (GO:0043170)	7438	2950	2565.46	1.15	2.91e-17
cellular macromolecule metabolic process (GO:0044260)	6753	2681	2329.19	1.15	8.07e-15
cellular response to stimulus (GO:0051716)	6227	2476	2147.77	1.15	2.97e-13
single-organism process (GO:0044699)	12755	4996	4399.35	1.14	3.45e-45
response to stimulus (GO:0050896)	7621	2985	2628.57	1.14	2.06e-14
regulation of cellular metabolic process (GO:0031323)	5814	2296	2005.32	1.14	1.96e-10
regulation of macromolecule metabolic process (GO:0060255)	5607	2210	1933.92	1.14	1.86e-09
regulation of primary metabolic process (GO:0080090)	5631	2214	1942.2	1.14	4.45e-09
biosynthetic process (GO:0009058)	4673	1814	1611.77	1.13	7.06e-05
organic substance biosynthetic process (GO:1901576)	4587	1783	1582.11	1.13	7.13e-05
cellular biosynthetic process (GO:0044249)	4493	1749	1549.69	1.13	7.31e-05
regulation of gene expression (GO:0010468)	4074	1591	1405.17	1.13	0.00022
cellular process (GO:0009987)	14147	5472	4879.47	1.12	8.7e-50
biological regulation (GO:0065007)	11133	4289	3839.91	1.12	6.1e-23
single-multicellular organism process (GO:0044707)	6193	2382	2136.04	1.12	1.38e-06
cell communication (GO:0007154)	5325	2059	1836.66	1.12	1.19e-05
single organism signaling (GO:0044700)	5192	1997	1790.78	1.12	0.000114
signaling (GO:0023052)	5195	1998	1791.82	1.12	0.000115
regulation of cellular macromolecule biosynthetic process (GO:2000112)	3768	1461	1299.63	1.12	0.00458
regulation of macromolecule biosynthetic process (GO:0010556)	3875	1498	1336.53	1.12	0.0058
regulation of biosynthetic process (GO:0009889)	4098	1577	1413.45	1.12	0.00696
macromolecule biosynthetic process (GO:0009059)	3651	1407	1259.27	1.12	0.0257
cellular macromolecule biosynthetic process (GO:0034645)	3576	1378	1233.41	1.12	0.0341
regulation of biological process (GO:0050789)	10614	4073	3660.9	1.11	8.26e-19
regulation of cellular process (GO:0050794)	10120	3891	3490.51	1.11	1.38e-17
signal transduction (GO:0007165)	4801	1840	1655.92	1.11	0.00145
regulation of nitrogen compound metabolic process (GO:0051171)	4148	1590	1430.7	1.11	0.014
regulation of cellular biosynthetic process (GO:0031326)	4054	1553	1398.27	1.11	0.022
multicellular organismal process (GO:0032501)	6444	2455	2222.61	1.1	1.72e-05
nitrogen compound metabolic process (GO:0006807)	5475	2074	1888.39	1.1	0.00346
biological_process (GO:0008150)	16542	6233	5705.54	1.09	1.33e-55
neurological system process (GO:0050877)	1277	336	440.45	0.76	0.000415
G-protein coupled receptor signaling pathway (GO:0007186)	1197	272	412.86	0.66	1.64e-10
sensory perception (GO:0007600)	945	181	325.94	0.56	2.17e-15
detection of stimulus (GO:0051606)	726	115	250.41	0.46	1.62e-18
detection of chemical stimulus involved in sensory perception of smell (GO:0050911)	423	1	145.9	< 0.2	1.13e-58
detection of chemical stimulus involved in sensory perception (GO:0050907)	462	7	159.35	< 0.2	5.09e-55
sensory perception of smell (GO:0007608)	450	12	155.21	< 0.2	3.15e-47
detection of chemical stimulus (GO:0009593)	496	19	171.08	< 0.2	1.89e-46
sensory perception of chemical stimulus (GO:0007606)	536	28	184.87	< 0.2	7.97e-44
detection of stimulus involved in sensory perception (GO:0050906)	514	32	177.28	< 0.2	7.4e-38

## Sheet: Table S20
Supplementary Table 20: Overlap of PLS identified genes from models of all genes vs tissue modulus and all genes vs disease score
set 1. PLS all coding genes vs tissue modulus 15 - 20 % (loading weight > |0.007|)
set 2. PLS all coding genes vs disease score (loading weight > |0.007|)
set.3 PLS matrisome proteins vs tissue modulus 15 - 20 % (loading weight > |0.08|)
set.4 PLS matrisome proteins vs disease score (loading weight > |0.08|)
red = positive association, blue = negative association
gene						protein
set.1	set.2	common.in.sets1.and.2	unique.in.set1	unique.in.set2		set.3	set.4	common.in.sets3.and.4	unique.in.set3	unique.in.set4
PPEF1	RHOF	PPEF1	2016-09-08	2003-09-01		COMP	PLOD1	COMP	THBS4	CTSD
SLC39A4	ST14	SLC39A4	2016-03-08	2009-09-01		PLOD1	S100A11	PLOD1	CILP	SERPINA3
GRM4	H2AFY2	GRM4	MGAT5B	DCLRE1C		THBS1	SFRP4	THBS1	COL6A2	S100A4
SLC35D3	MAG	SLC35D3	CCND1	2009-03-01		FBLN1	ANXA4	FBLN1	NID2	COL5A1
MMP11	TRIM59	MMP11	GALNT14	CDCA7		LMAN1	MXRA5	LMAN1	ASPN	HRG
CLEC18B	EPHA1	CLEC18B	VSTM2L	MICB		SPON1	SERPINH1	SPON1	NID1	F2
MFSD3	CCDC33	MFSD3	LHX1	RAD18		SERPINH1	SPON1	SERPINH1	EMILIN2	TNC
PAX2	ZBTB12	PAX2	SUGCT	KIF20B		SFRP4	HPX	SFRP4	FBN2
APBA2	SERINC2	APBA2	TMEM25	ZNF713		FN1	VCAN	FN1	FBN1
SPINT1	HAGHL	SPINT1	ERVMER34.1	MBOAT1		VCAN	HCFC1	VCAN	MMRN2
TENM4	DNAH3	TENM4	2016-09-02	POLQ		S100A11	COL11A1	S100A11	OGN
COL10A1	UXS1	COL10A1	SUSD2	GPR19		S100A1	PLOD3	S100A1
SLC44A4	MCM2	SLC44A4	SERPINA5	ZNF257		HCFC1	LGALS3	HCFC1
RHPN1	PSD4	RHPN1	SLC35B2	GTF2E1		ANXA4	CTSB	ANXA4
PTPRU	RASGEF1A	PTPRU	MATN3	MTFR2		COL11A1	S100A1	COL11A1
HOPX	MAGEF1	HOPX	CETN2	NHLRC1		PCOLCE	CSTB	PCOLCE
CD164L2	IL4I1	CD164L2	ETV5	ROS1		SFRP2	PLG	SFRP2
FAM181A	ZNF572	FAM181A	SFRP5	IFNLR1		MXRA5	COL8A1	MXRA5
LMTK3	TRAF2	LMTK3	OXGR1	ZFP30		ANXA6	FN1	ANXA6
RBBP8NL	IKBKE	RBBP8NL	AEBP1	OLFM3		AEBP1	FBLN2	AEBP1
CYB561	LEMD1	CYB561	PTTG1IP	APOBEC3F		ANXA5	SFRP2	ANXA5
ZNF250	SPINT2	ZNF250	NRAP	SYK		EFEMP2	FBLN1	EFEMP2
COL11A1	SORD	COL11A1	SWI5	C12orf65		HPX	PCOLCE	HPX
GSTO2	GALNT6	GSTO2	ITGB5	RMI1		CSTB	ANXA5	CSTB
AQP5	SLC35F3	AQP5	MMP3	TCF7		LGALS3	COMP	LGALS3
FAM174B	CCDC167	FAM174B	VPS28	CKAP2L		FBLN2	LMAN1	FBLN2
SBK1	KRT86	SBK1	TREX2	CENPI		COL8A1	ANXA6	COL8A1
ETV4	PRSS21	ETV4	LGSN	PRIM1		THBS4	LTBP2	PLOD3
HAPLN1	CACNA1B	HAPLN1	SHISA2	C5orf54		PLOD3	AEBP1	LTBP2
ST6GALNAC5	CELF5	ST6GALNAC5	ZNF668	FAM117B		CILP	LGALS1	SERPINA1
MRGBP	RBP1	MRGBP	SMIM1	DEPDC1B		LTBP2	THBS1	LGALS1
ST6GALNAC2	SPINT1	ST6GALNAC2	PGLS	NMI		SERPINA1	CTSD	ANXA1
INHBA	SAMD10	INHBA	NKAIN4	FIGNL1		LGALS1	ANXA7	CTSB
TMEM92	EMX2	TMEM92	PRR13	NME1-NME2		ANXA1	AGT	PLG
CARD9	LGR6	CARD9	WISP1	CENPW		CTSB	SERPINA3	GPC6
SLC24A2	YDJC	SLC24A2	IFT52	MOV10		PLG	GPC6	AGT
COMP	ARHGAP8	COMP	IGFL2	TIFAB		GPC6	S100A4	S100A6
TMEM221	C1orf74	TMEM221	SYT8	BBC3		AGT	COL5A1	ANXA7
LRRC15	ST6GALNAC5	LRRC15	SLC10A3	ITGB7		S100A6	SERPINA1	LAMB1
SERINC2	PDE6B	SERINC2	LRFN3	APOBEC3G		ANXA7	HRG	COL1A1
H2AFY2	ATG9B	H2AFY2	NME1.NME2	POTEI		COL6A2	S100A6	CTSG
LIX1	MARVELD3	LIX1	CHAD	ZC3H8		LAMB1	F2	COL15A1
PRSS22	RBBP8NL	PRSS22	ZNF114	HLA-DOB		COL1A1	TNC	LAMA5
CLDN9	SH2D3A	CLDN9	THEM6	ERVMER34-1		NID2	ANXA1	HSPG2
SAMD10	DTNB	SAMD10	CRYGN	BRD8		ASPN	EFEMP2	LAMA4
LEMD1	FOXP3	LEMD1	MVB12A	TADA1		CTSG	COL6A3	COL6A6
DNAJB13	MDK	DNAJB13	TGFA	CEP70		NID1	S100A8	S100A8
PLEKHB1	TMEM92	PLEKHB1	PDLIM7	HOXD4		COL15A1	VWF	VWF
ST14	ZNF774	ST14	IFITM10	ASPM		LAMA5	LAMA4	COL6A3
C15orf62	LYPD1	C15orf62	CD74	ZNF530		HSPG2	COL6A6	COL4A2
EMX2	LLGL2	EMX2	MEA1	SLC15A2		LAMA4	LAMA5	TNXB
SCXA	RIBC2	SCXA	MED20	ZNF43		COL6A6	COL15A1	ABI3BP
ARHGAP39	MMP7	ARHGAP39	ITGB4	ZNF90		EMILIN2	LAMB1	LAMC1
STARD10	RNF183	STARD10	SLC44A3	CRNKL1		S100A8	COL1A1
MMP13	ZNF627	MMP13	CERCAM	CKAP2		VWF	HSPG2
ZNF48	PNMA3	ZNF48	THY1	BMF		COL6A3	CTSG
GPR39	C1orf106	GPR39	ISM1	NFXL1		FBN2	TNXB
RNF183	SKAP1	RNF183	NBL1	SFXN1		FBN1	COL4A2
CCDC167	ABCC4	CCDC167	VAX2	DSN1		MMRN2	ABI3BP
SERPINB5	ZNF710	SERPINB5	TRAPPC9	SLC38A1		OGN	LAMC1
ARHGEF19	MGME1	ARHGEF19	MORN2	BRIP1		COL4A2
GALNT6	SBK1	GALNT6	CREB3L1	HEY2		TNXB
FAM19A5	TFAP2A	FAM19A5	USP11	ZNF738		ABI3BP
FOXQ1	SLC35D3	FOXQ1	FAM211B	TNIK		LAMC1
PPAP2C	HAPLN1	PPAP2C	TMEM121	KIAA1524
LLGL2	HOPX	LLGL2	PCDHA7	ZNF461
CLDN6	FCHO1	CLDN6	PTPRN	APOC1
KLK6	FHAD1	KLK6	PLOD1	PRC1
PODNL1	ARMC3	PODNL1	TSPAN33	ZNF254
SDC1	ILDR1	SDC1	FAM195B	ZNF879
CXXC5	NGEF	CXXC5	LGALS3BP	SHANK1
COL22A1	ETV4	COL22A1	PCSK1N	ASUN
CHST1	TMPRSS13	CHST1	GSTO1	IL9R
UGT2B7	DNAJC9	UGT2B7	STX1A	HEXIM2
ZNF707	HMGN1	ZNF707	NEU1	PBK
TMPRSS4	TIGD1	TMPRSS4	ATP2B2	ZSCAN31
LRRN2	GRM4	LRRN2	TGIF2.C20orf24	DHRS13
MARVELD3	EPHB3	MARVELD3	COL5A2	MCM6
SLC37A4	STRA6	SLC37A4	CNN2	ATAD2
SMYD3	OCIAD2	SMYD3	C8orf82	ZNF33A
TRIM29	FBXO16	TRIM29	BRE	POTEF
PNOC	NDP	PNOC	ASIC2	ZNF485
RASAL1	IRF6	RASAL1	MAP1S	CCDC150
ALPK2	CCDC74A	ALPK2	COL16A1	TTC30A
PDE6B	DCDC2	PDE6B	MPZL2	GORAB
MFAP2	NPM3	MFAP2	ZNF414	ZBTB26
KRT17	ZNF250	KRT17	SFRP4	LGALS9
MFSD6L	FAM181A	MFSD6L	KCNS3	XK
TPRN	PSRC1	TPRN	TMEM158	PTPN7
EMC10	OVOL2	EMC10	P4HA1	OXSM
BMPR1B	ARHGEF19	BMPR1B	STXBP5L	GPATCH1
MAGEF1	DYDC2	MAGEF1	PDE9A	GOLPH3L
DOK7	C16orf59	DOK7	ERI3	ZNF112
TMPRSS13	PAK6	TMPRSS13	ST6GALNAC4	ZNF346
ITM2C	PNOC	ITM2C	C12orf68	HESX1
CCDC33	SULT2B1	CCDC33	FHL2	LIPT2
TMEM231	PVRL4	TMEM231	SUPT3H	SMARCAL1
MAG	DOK5	MAG	GLS2	RCAN3
CCNO	TMED3	CCNO	GPAA1	CT45A5
EPYC	DNAH14	EPYC	DLX5	NDC1
LOXL1	C1orf210	LOXL1	ACOT7	NRTN
UNC5B	ZNF260	UNC5B	RNF144B	ZNF284
EPHA1	FAM131C	EPHA1	DPEP3	PARP4
LGR6	TSSC1	LGR6	TNNT2	ZNF182
LYPD1	MEX3A	LYPD1	IGSF21	XPO1
MROH6	EXPH5	MROH6	ADAMTSL2	DBF4B
F2RL1	CXXC5	F2RL1	YIF1A	BLNK
C1orf172	IQCC	C1orf172	AFMID	DENND2D
KLRG2	COL10A1	KLRG2	RPL10A	WDR76
FAM131C	HN1	FAM131C	COL2A1	ZNF594
TMEM139	TARBP2	TMEM139	MFGE8	IFIT1
FOXJ1	GALE	FOXJ1	SIGLEC10	YAE1D1
KRT80	CD164L2	KRT80	TNS4	CACYBP
TSSC1	SVOPL	TSSC1	EVA1B	ZIK1
MMP7	CD22	MMP7	TP53	VWA7
ARMC3	CDKN2A	ARMC3	ESRRG	SLC16A9
WNT7A	FAM90A1	WNT7A	SUMO3	SYMPK
C9orf16	LEF1	C9orf16	TPRA1	RBBP4
2012-09-08	SMIM22	CLEC18C	IFT122	KNSTRN
CLEC18C	FANCA	CADM1	LTBP2	RBM12B
CADM1	RNF43	MEX3A	DNAJB11	METTL12
MEX3A	RHNO1	CLDN16	FLYWCH2	ZNF836
CLDN16	TONSL	GABRG3	RAI1	SPAG5
GABRG3	PFN2	C9orf116	CWC15	FBXO34
C9orf116	AIM1L	SLC52A2	ZBTB8B	TCEA3
SLC52A2	C5orf49	CLEC18A	VWA1	RCCD1
2012-03-08	TTC22	SYNE4	S100A1	PRMT6
CLEC18A	LAD1	PYCR1	RHOD	EPHA10
SYNE4	APBA2	CELF5	AAGAB	FAM84B
PYCR1	NAGS	OVOL2	RPL22L1	LGR5
CELF5	ZNF93	LAD1	LEPRE1	ZNF785
OVOL2	BCL11A	ZBTB12	ARF3	GPR82
LAD1	FANCF	LRRC55	IFITM1	RFX5
ZBTB12	PIGC	CLEC5A	SSNA1	ASF1A
LRRC55	KRTCAP3	PPAPDC1A	LIPC	PARP1
CLEC5A	ADAM28	CST1	IFT46	CSRP2BP
PPAPDC1A	COL11A1	GPRC5C	LRRC14	PLGRKT
CST1	CEP72	PVRL4	CCDC104	SASH3
GPRC5C	RHPN1	CCDC64B	TANC2	ZNF701
PVRL4	BCAS4	LPO	EEF1D	CEP250
CCDC64B	PKM	DYDC2	ADC	GALNT12
LPO	C11orf82	LAMP5	PRR5.ARHGAP8	MCM8
DYDC2	LIG1	C1orf106	NWD1	ZNF3
LAMP5	MMP11	CDKN2A	C6orf48	MTMR4
C1orf106	PPP1R14C	LYPD6B	ALDH1B1	HAMP
CDKN2A	GRHL2	ARMC7	MARVELD1	WDR63
LYPD6B	AHCY	ATP2C2	USH1G	RASEF
ARMC7	CDT1	TFAP2A	WDR53	FBXO41
ATP2C2	SOX12	CYP26A1	TMEM216	TARS2
TFAP2A	KLRG2	PLEKHS1	DDX25	RAB42
CYP26A1	GMNC	WDR34	ARL3	ACTL8
PLEKHS1	CDH1	FBXW9	NEURL1	PRR5-ARHGAP8
WDR34	PAFAH1B3	PRAME	APRT	PDIK1L
FBXW9	PRAME	SYT13	SIGIRR	USF1
PRAME	MFSD6L	CUTA	PAAF1	CBX3
SYT13	KLHL14	EPHB3	QPCT	ZNF253
CUTA	LIX1	RNF43	AGAP3	PCDHA11
EPHB3	ZNF695	SAYSD1	IL10RB	ZNF616
RNF43	PROM2	SMIM22	SNRPD3	ZNF827
SAYSD1	LRRC8D	ZNF16	MED12L	INCENP
SMIM22	CAPG	SOWAHB	C19orf53	FRAT2
ZNF16	C1orf186	IL4I1	DCTN5	SAP130
SOWAHB	NIPSNAP1	GPR68	CDK2AP2	PIGR
IL4I1	GPR39	SPATA17	C11orf84	LIN9
GPR68	SYT13	B3GNT3	C20orf195	CCDC112
SPATA17	SYNE4	PAX8	CST2	CKS1B
B3GNT3	PYCR1	CD1A	SFRP2	NTN5
PAX8	BEST4	C1orf186	TMSB10	TRPS1
CD1A	TMPRSS4	GCNT3	HLA.DOA	ZFP14
C1orf186	ZNF165	HINFP	NTF3	ORC5
GCNT3	FARP1	PRRG2	MROH2A	OAS1
HINFP	CCDC64B	DCDC2	FAM20A	AHDC1
PRRG2	UGT2B7	LOXL4	RAC3	ABHD10
DCDC2	THNSL1	PKP3	IRAK1	GTF2H4
LOXL4	STMN1	CCDC24	KATNB1	MOCS3
PKP3	SMC4	CRABP1	CRMP1	C19orf55
CCDC24	AUNIP	C5orf49	GRIK3	SFT2D3
CRABP1	AP3M2	KRTCAP3	IMPDH2	PMFBP1
C5orf49	AQP5	UXS1	SCARF2	SMPD4
KRTCAP3	B4GALNT3	HN1	CERS1	TRIM38
UXS1	CLDN16	SLC5A1	RCN3	RPP38
HN1	APOC2	OVOL1	KRT6B	RNF44
SLC5A1	CELSR1	FKBPL	ZHX1.C8ORF76	MAP3K13
OVOL1	SRGAP3	PFN2	CLEC11A	PARP12
FKBPL	ARMC9	PKM	P4HA3	RPS10-NUDT3
MGAT5B	GOT2	CDH6	2016-09-07	DNA2
PFN2	FOXJ1	C1orf210	NOG	ZNF273
PKM	TRAIP	C6orf1	ATP8A2	ZNF382
CDH6	GJB1	AZI1	C11orf24	CDH8
C1orf210	FAM136A	PLEKHG4B	SEMA5B	IL2RG
C6orf1	TMEM177	NPM3	SMPD2	ZNF737
AZI1	TFAP4	KIF26B	FCGBP	ZNF233
PLEKHG4B	KIF2C	C16orf59	FGF18	GMNN
NPM3	RASAL1	ST8SIA2	CPNE1	CDC6
KIF26B	SYNDIG1	NAT14	FAM69C	MTIF2
C16orf59	KIF22	FAM135B	CLHC1	ZNF101
ST8SIA2	TJP3	KRT23	TPM4	UNC5A
NAT14	DLG3	RHOV	PPIL3	C2orf44
FAM135B	PPAPDC1A	ESPN	MTFP1	FAM86B1
KRT23	BSPRY	GJB2	GCK	FKBP3
RHOV	CBX8	CPSF1	PCGF2	PEG10
ESPN	TMEM139	CACNA1B	COL5A1	MIPEP
GJB2	FUT3	CRTAC1	OGFOD3	ZNF837
CPSF1	PKMYT1	EPN3	TMEM161A	ZNF772
CACNA1B	ASF1B	C10orf35	CD207	CKAP5
CRTAC1	DYRK2	ZNF853	ISLR	ZNF618
EPN3	SDC1	ZNF365	TEN1	SLC52A1
CCND1	PTTG1	TMED3	S100A16	TSPYL4
C10orf35	CCNO	RHOF	PRDX4	AHNAK2
ZNF853	GINS2	EFNA4	PPP4C	HOXC4
ZNF365	RNASEH2A	MCM2	YIPF3	CCDC163P
TMED3	RAB8A	PNMA3	UXT	TMEFF1
RHOF	CCDC78	DTNB	SHANK2	VPREB3
EFNA4	KIF26B	SST	NUTF2	ZNF574
MCM2	MTL5	XXYLT1	CNIH2	SASS6
PNMA3	DOK7	RAB8A	SS18L1	GMPS
DTNB	RECQL4	MYCL	IGLL1	FAM103A1
SST	PLEKHG4B	GRHL2	FKBP1B	GPSM2
XXYLT1	RBM38	ALDH3B2	RIPK4	ECT2
RAB8A	DLX3	PTDSS1	MRPL14	NCEH1
MYCL	SPDEF	SLC35F3	FBXO2	CCDC34
GRHL2	GGT6	TRIM59	PIGQ	PHYHIPL
ALDH3B2	TMEM102	FBXO32	KERA	HARBI1
PTDSS1	CCR8	CCDC65	RPS24	ZNF418
SLC35F3	GSTO2	LSM2	RPS10.NUDT3	CHAF1A
TRIM59	ZNF512	PRSS33	CEL	PCDH7
FBXO32	PACSIN1	SUSD4	BCAT1	ZNF555
CCDC65	MND1	GLB1L2	WDR46	TRIM14
LSM2	WDR34	ABCC4	ANXA13	HLA-DMB
PRSS33	C12orf56	IRF6	FOXF2	ADTRP
SUSD4	ARMC7	MDK	TLE6	NCAPG2
GLB1L2	ZNF786	ASCL2	NELFE	SKA2
ABCC4	COL22A1	CTHRC1	C9orf43	TGIF2-C20orf24
IRF6	PARS2	DRD4	VWA9	DUSP10
MDK	CENPM	TLDC2	DIO2	ZDHHC23
ASCL2	UGT8	CMTM7	PPIB	C15orf65
CTHRC1	ZNF525	TARBP2	GSDMD	ZGLP1
DRD4	CLDN10	GPR173	HLA.DQA1	COA6
TLDC2	KIF12	FBXL6	HLA.DRB1	GPR98
CMTM7	TEC	TACSTD2	TMEM134	PTGS1
TARBP2	FZD2	C20orf85	PDXP	UBE2L6
GPR173	PRIM2	ESRP1	PACS1	CCSAP
FBXL6	SOWAHB	FN1	C6orf132	DENND1C
TACSTD2	PIPOX	SPEF1	ORMDL2	WDR78
C20orf85	TMEM231	DLX3	RHBDF2	ZBTB3
ESRP1	HOMER2	LAMB3	FANK1	IRF5
FN1	CDS1	HMGB3	PPM1G	KDM5B
SPEF1	NAT14	FHAD1	THAP11	DAPP1
DLX3	C2orf82	TMEM125	HLA.DOB	CD19
LAMB3	LYPD6B	WNT6	MYO1D	MDC1
HMGB3	HIST1H2BG	WNT10A	GRHL3	ZNF124
FHAD1	C1orf172	PIPOX	ST3GAL4	CDAN1
TMEM125	ESPN	NKD2	CFL1	CDK5RAP3
WNT6	ALDH3B2	B4GALNT3	FOXP4	TPMT
WNT10A	NEK2	B3GALT5	NRBP1	ARAP1
PIPOX	SST	PROM2	DUSP15	BCL2L15
NKD2	CBLC	RASGEF1A	KCTD14	NEU3
B4GALNT3	SPAG17	GMDS	WBSCR27	CD27
B3GALT5	METTL18	HECW1	GRIN2D	MXD3
PROM2	B3GNT3	PRSS21	C7orf50	FRRS1
RASGEF1A	KCNN4	MOXD1	RAPSN	SEL1L3
GMDS	SMG9	FAM90A1	MISP	SUPT20H
HECW1	NUPR1L	GALNT3	MPV17L2	ASB7
PRSS21	CAPN13	SYNGR2	C2CD2L	ZNF223
MOXD1	DIRAS2	PPP1R14C	VASN	TBCC
FAM90A1	VANGL2	SORD	CTSK	BRCA2
GALNT3	CARD9	FSTL4	PLGLB1	NAPSA
SYNGR2	PKP3	STRA6	STRADA	ZNF302
GALNT14	THOC3	LRRC46	BRINP1	M1AP
PPP1R14C	MAPK13	KCNC3	PPP1R11	ATAD5
SORD	DNAJB13	VDR	AK8	SETD4
FSTL4	RMI2	CNGB1	NSMCE1	ZNF75A
STRA6	SLC37A4	RPL39L	ANTXR1	DUS4L
LRRC46	LSM2	KREMEN2	ABCG4	ARPC5
KCNC3	MRPL48	ARRDC1	KIAA1644	ADAR
VDR	GMDS	EPCAM	TIMM8B	HOXD1
CNGB1	GJB3	ACTL10	SPNS3	HTR2B
RPL39L	PAQR4	GJB1	TBL3	SLC4A8
KREMEN2	CEP85	SLC6A12	CANT1	CT45A1
ARRDC1	SOWAHD	ZNF165	FAM181B	ZNF248
EPCAM	TICRR	SGPL1	MAL	APOBEC3D
ACTL10	PATZ1	PNMAL1	TMEM208	FHDC1
GJB1	GALNT3	SALL1	CERS5	TDO2
SLC6A12	FSTL4	SPINT2	AGPAT1	LCK
ZNF165	ZNF860	APH1A	THAP4	ZNF133
SGPL1	GYLTL1B	WDR54	STAMBP	RSAD2
PNMAL1	AZI1	EPHX3	BEX4	CCDC115
SALL1	KCNT1	RSPO4	TMEM59L	PPP6R1
SPINT2	RTP4	SLC35C2	ATP5G2	ZNF561
APH1A	F2RL1	TRAF2	RIN2	CXorf21
WDR54	LRRC61	GID8	TCTN3	FDXACB1
EPHX3	CCHCR1	SHMT2	SYNPO2L	MECOM
RSPO4	ORC1	EVA1A	NCS1	PDCD6
SLC35C2	STARD10	DNAH3	TTC21A	SNAI3
TRAF2	CASP2	MAST1	NUDT10	CDKAL1
GID8	ACBD7	C2orf54	NAA10	ZNF813
SHMT2	NDC80	ILDR1	NELFB	GEN1
EVA1A	ZNF385C	TTLL9	SYT5	RASGRP1
DNAH3	KRT80	VANGL2	ALYREF	TNFAIP8L1
MAST1	PTK6	PRSS1	SDK2	OPN3
C2orf54	CHTF18	FIBP	GGT7	TRIM36
ILDR1	CLDN6	GJB3	MRPL55	MURC
TTLL9	2003-09-01	LEF1	RNF212	SENP8
VANGL2	CCDC8	ZNF443	RPL30	BCL2L14
PRSS1	KIFC1	COL8A2	SYT11	CDC25B
FIBP	NUP210	SLC12A8	RPL36A	PGBD5
VSTM2L	MCM5	ITGBL1	SLC27A4	YEATS4
GJB3	PTPRU	S100A2	HLA.DMB	GPR158
LEF1	HIST2H4A	FARP1	KRT6A	PRKD2
ZNF443	PEX11B	CDS1	RPS26	GLE1
COL8A2	MYCL	RTKN	GHRL	MAGEA9
SLC12A8	PAX8	MARVELD2	HLA.DRA	ZNF350
ITGBL1	ZNF726	ARSE	FOLH1	MC4R
S100A2	LIMK1	CNKSR1	TMEM203	CDH18
FARP1	CDCA4	CDSN	HGS	MCOLN2
CDS1	ASCL2	MYL6B	GPR64	RPS14
RTKN	VWDE	RGS10	MEGF10	SH2D4A
MARVELD2	PDRG1	KCNT1	CSNK2B	SPEF2
ARSE	ACTL10	IL17RB	RFX1	KNTC1
CNKSR1	STXBP2	KRT14	GPR56	KBTBD4
CDSN	LRRC55	MUC5B	CCDC40	ZNF480
MYL6B	SMYD3	CAPN13	BRICD5	NPAS3
RGS10	CHMP4C	SOX11	ACTG1	F2RL2
KCNT1	MRGBP	FBXL22	ZC3H10	CCDC146
IL17RB	ESRP1	IKBKE	SERPINH1	NME7
KRT14	EPHX4	ATP6V1B1	NONO	SNX20
MUC5B	SERPINB5	C1orf116	RHBDD2	C1orf168
CAPN13	RPL39L	BSPRY	MIF4GD	IFT81
SOX11	PAK1	BGN	HSD17B8	FAM182B
FBXL22	NCAPH	CLNS1A	PRDX5	VAMP1
IKBKE	MCM4	CELSR2	PIH1D2	RNPEP
ATP6V1B1	ZNF48	CBLC	PTP4A3	KAL1
C1orf116	AGMAT	DPY30	TRAPPC4	GLTP
BSPRY	RGS10	NCMAP	PCP4	TMEM243
BGN	FAM171A2	PDIA5	ZNF517	TPRG1L
CLNS1A	SRD5A1	HSF2BP	PIGT	KCTD16
CELSR2	PRSS22	EFNA3	C19orf44	RTEL1-TNFRSF6B
CBLC	HES2	SH2D3A	LRRIQ1	TCEB3
DPY30	FGFR2	CNPY3	PRICKLE3	EFCAB2
NCMAP	RPS3	ZNF512	SAMD14	WFDC1
PDIA5	SLC44A4	SMARCD3	TBCCD1	MCMBP
HSF2BP	EHMT2	CLDN10	MED8	LPIN3
EFNA3	AMY1B	SMPX	ACTR3C	P2RX1
SH2D3A	CCNB1	CHPF	RNF25	C4B
CNPY3	BUB1	SLC35F2	TFAP2C	FAM200B
ZNF512	FOXQ1	RPS3	P2RY6	KCNA5
SMARCD3	SPDL1	CDCA4	TSNARE1	ZDHHC11
CLDN10	VAMP8	SULT2B1	VSIG10L	IRF1
SMPX	CYB561	RNF5	TMEM234	FEZ1
CHPF	CELSR2	AUNIP	TTC12	ANAPC10
SLC35F2	SHMT2	CCDC160	JADE3	TYW1
RPS3	SALL4	PRR7	LAMTOR1	NFATC2
CDCA4	BORA	FAM136A	TWF2	DUSP14
SULT2B1	CDC20	UNC5CL	EXOSC1	TVP23A
RNF5	AURKA	RSPH1	HSPB1	FEM1A
AUNIP	RHOV	KCNIP4	NADSYN1	PPP1R2
CCDC160	TMEM9	RBP1	DNPH1	UTP15
PRR7	C10orf35	FZD2	FAM129B	ADNP2
FAM136A	PLEKHB1	CDH1	SHARPIN	METAP2
UNC5CL	ZNF766	DIRAS2	AAAS	CLEC2L
RSPH1	NFE2L3	CDC20B	BCL7C	NCAM2
KCNIP4	ZNF280B	S100A14	RAB33A	SERPINA3
RBP1	BAK1	KLHL14	PQBP1	PANX1
FZD2	FBXW9	DPEP1	PHLDB3	RFX8
CDH1	ABHD17C	RAB25	HPS6	STK17B
DIRAS2	TMEM125	AIM1L	BLOC1S4	ITPKB
CDC20B	TACSTD2	SCNN1A	SLC35B1	HSD17B2
S100A14	TACC3	SLC13A5	CACNG8	SLC39A6
KLHL14	PNKD	CTSV	ARSG	CTF1
DPEP1	KLK6	TDP1	SEC61A1	DLAT
RAB25	CNNM4	HMGA2	DXO	ACVR1B
AIM1L	POLD1	CAPN1	WDR6	TMEM218
SCNN1A	CNGB1	EMID1	PTMS	PAK2
SLC13A5	HJURP	NR2F6	OSTC	DYRK3
CTSV	CDCA5	FHL3	PPT1	NQO1
TDP1	CCDC114	CCHCR1	ARPC4	WASF1
HMGA2	RTKN	TONSL	SPAG4	PSMD5
CAPN1	DAPL1	ITPA	PSORS1C1	CTSC
EMID1	SGPL1	OXLD1	PCDHA12	GNB1
NR2F6	APH1A	RPUSD1	SLC52A3	PRR9
FHL3	PNMAL1	C2orf68	MS4A14	SLC28A3
CCHCR1	C20orf85	HKDC1	DHX57	DEFA1
TONSL	CHST1	FCHO1	RPL21	PHF11
ITPA	CDC42BPG	PIGU	MAGED4	RCSD1
OXLD1	BUB1B	LIMK1	RPL41	LOX
RPUSD1	GID8	LCN12	CMTM3	ARSB
C2orf68	RTN4R	LCN2	DALRD3	TET2
HKDC1	RAB25	RECQL4	AUP1	TMEM198
FCHO1	CNKSR1	COMMD5	ZW10	C16orf74
PIGU	ZNF16	OCIAD2	EPHB1	DNAJA2
LIMK1	SLC5A1	PPP1CA	COL1A2	PRDX3
LCN12	CARD11	NAGS	TMEM187	SMCO3
LCN2	RAD51	DNAH14	TADA3	RP2
RECQL4	ITGB6	ZNF695	C8orf31	GATM
COMMD5	YIPF2	GTF2IRD1	PTS	UBR7
OCIAD2	F12	SPATC1L	MRPL17	PLK3
PPP1CA	B3GALT5	CHST10	LYPD2	GPBP1
NAGS	HIST3H2A	SPDEF	ATAD3A	MGAT2
DNAH14	EHF	SLC29A2	CHCHD5	RLIM
ZNF695	SDHAF1	ARHGAP8	GADD45GIP1	VPS4A
GTF2IRD1	C15orf27	RCOR2	WRNIP1	SLC10A7
SPATC1L	BCL9	GOT2	SARNP	C3
CHST10	S100A14	HPN	SLC46A2	STON1-GTF2A1L
SPDEF	PRRT3	SMCO4	C19orf33	PHC2
SLC29A2	LMO7	B4GALNT4	EXT1	DPH1
ARHGAP8	GINS1	C2orf82	PRKCG	PKIG
RCOR2	FXYD3	ENO2	STK16	PBX3
GOT2	GPR173	RIBC2	HDAC7	BIN3
HPN	SGOL1	LAPTM4B	C11orf72	SIGLEC11
SMCO4	CLEC18B	ATF6B	CCL11	ANKS1A
B4GALNT4	KIF11	GLDC	SEZ6L2	CRY1
C2orf82	NXNL2	SOX12	RPL38	FBXW4
ENO2	CCNB2	PRSS8	PITX1	PGD
RIBC2	LSR	SPOCK3	COLGALT1	DDX19A
LAPTM4B	WDR91	SALL4	ANAPC11	PAK3
ATF6B	GLDC	PAFAH1B3	SOX15	LMCD1
GLDC	C9orf152	MYLPF	TTLL1	STK32B
SOX12	PODNL1	TMC4	ERGIC1	CDC42EP4
PRSS8	MYBL2	CDK4	LRSAM1	SLC25A6
SPOCK3	TTK	SULT4A1	SPNS1	SMIM13
LHX1	ING4	COL9A2	CTSH	RNASEH1
SALL4	ABHD11	KIF1A	EDF1	NELL1
PAFAH1B3	AURKB	HMGN1	FARSA	LIF
MYLPF	TPRN	SVOPL	CHST11	TP53I13
TMC4	RFC4	KIF22	POSTN	BRPF3
CDK4	C15orf48	EHMT2	FAM178B	FPR1
SULT4A1	TMEM238	PEX11B	BUD13	SCUBE2
COL9A2	XRCC2	SPA17	PASD1	VSIG4
KIF1A	RSPO4	SFN	FAM132B	CDC5L
HMGN1	FAM110A	NEFH	TMEM136	ZDHHC18
SVOPL	ACSM3	FBN3	DCAF13	BIN1
KIF22	DCAF7	HOMER2	H2AFX	PDHA1
EHMT2	SUSD4	MAZ	RNF39	NMB
SUGCT	SLC50A1	CCDC114	DUSP23	TMEM150A
PEX11B	MFAP2	RIMS4	MRP63	C21orf2
SPA17	MTBP	KRT81	ANKRD1	ZNF689
SFN	MYB	KCNH2	ARHGEF16	MFSD11
NEFH	NCAPG	PTK7	GDF11	PITPNB
FBN3	DPP3	FAM187A	SCN8A	HK3
HOMER2	CHEK2	FXYD3	ZMYND19	PIGP
MAZ	CTSV	MYEOV	DDRGK1	PRPH
CCDC114	ZNF564	DPCD	ZNF629	ADAM15
RIMS4	GOLT1A	TMEM132A	B4GALT2	CC2D2A
KRT81	GCNT3	ITGB6	ATOX1	DLEC1
KCNH2	STRBP	IER5L	SYT12	SLC16A4
PTK7	LDB1	C12orf56	CIAPIN1	HUS1
FAM187A	TRIP13	TMEM258	CCDC71	FLRT1
FXYD3	SDSL	CASKIN1	PRMT5	RRN3
MYEOV	ABRACL	SPRN	SNRPG	RNMTL1
DPCD	CAPN1	RBM38	PRKAR1B	TMSB4X
TMEM132A	PCNA	PRPF6	MMP10	CCDC59
ITGB6	C2orf54	BST2	ZNRD1	IRAK2
IER5L	CHEK1	C9orf142	ENTPD7	2005-03-01
C12orf56	POU2F3	HYDIN	GSS	EPHB4
TMEM258	PRKCZ	CLN3	PPFIA3	NRBF2
CASKIN1	NUF2	ITGA3	ARVCF	TNFRSF11B
SPRN	PLEKHS1	TTC22	GGN	RBFA
RBM38	WDR62	DOK5	CACNG6	TRAF3IP1
PRPF6	TCF19	C11orf49	RPP25	TPRG1
BST2	IER5L	EDN2	NPFFR1	PCMT1
C9orf142	CDC20B	PLEK2	VMP1	SREBF2
HYDIN	CDC25C	CLDN3	C10orf55	SETD9
TMEM25	DCLRE1B	EFNA2	CCDC30	SUPT7L
CLN3	ZNF212	TSTA3	GMPPA	USP53
ITGA3	C2orf68	RNF8	TXNDC12	LSAMP
TTC22	ATP2C2	ATP6AP1	C4orf48	GPR75-ASB3
DOK5	TDP1	YDJC	RBM23	SLC25A1
C11orf49	INTS4	BSCL2	KRTCAP2	ARHGEF4
EDN2	HIST1H2AE	CBX8	SEC13	TMEM100
PLEK2	SKA3	KIF12	PAPSS1	SLC35D1
CLDN3	GPR143	RNF121	CLCNKB	SLC1A7
EFNA2	TPX2	LRRC61	MSANTD4	UBE2K
TSTA3	PRKCQ	ZNF710	HSPBP1	PEPD
RNF8	PTK7	SPTBN2	TACO1	ROM1
ATP6AP1	PARPBP	ZNF560	NUBP2	SPTAN1
YDJC	PPP2R2B	VAMP8	TIPIN	LTC4S
BSCL2	PASK	SCD5	SFXN5	ELOVL7
CBX8	ZNF853	MBOAT2	PRCC	POMC
KIF12	TMEM51	GYLTL1B	ZNF500	CCL15-CCL14
RNF121	OXLD1	MRPL48	TMEM189	CFHR1
LRRC61	EFNA4	MAPK15	RPL7A	JPH2
ZNF710	CRABP1	NUPR1L	HSF1	FST
SPTBN2	HINFP	RPS21	C7orf73	SKOR1
ZNF560	C5orf34	ENTPD8	NUDT22	PLXDC1
VAMP8	TCF3	SYNGR3	SERPINA1	TM9SF3
SCD5	C21orf58	SLC39A7	EDC3	MAPK14
MBOAT2	TENM4	VOPP1	SCN5A	PCGF3
GYLTL1B	NAA40	C1orf233	RFNG	FAM198A
MRPL48	HPN	TMEM63C	SSR2	CSF3R
MAPK15	ARHGAP39	LEPREL4	MAST2	RFX2
NUPR1L	MARVELD2	ERGIC3	THOC6	DAW1
RPS21	CREB3L4	RPS2	FAM83F	PLN
ENTPD8	KCNC3	MANF	COQ4	DYNC2LI1
SYNGR3	EPCAM	SMG9	TBC1D10B	DSTN
SLC39A7	ITGA3	CCDC74A	PARP10	ARL2BP
VOPP1	RAB11FIP4	RTN4R	PCBP4	MGARP
C1orf233	POLA2	PAQR4	CEP95	ABHD17A
TMEM63C	ENKUR	GIPC1	CDPF1	UPK3B
LEPREL4	SH3D21	KCNN4	IRF2BP1	MYO1H
ERGIC3	PTPN6	TMEM45B	PAFAH1B2	SRSF4
RPS2	LTA	TMEM177	TMEM54	GLIPR1L2
MANF	OTUB2	CACFD1	CHMP6	ZNF330
SMG9	CPNE7	NABP2	GLTPD1	HBG1
CCDC74A	C1orf174	ELMO3	WDR4	PDCD1LG2
RTN4R	C7orf49	NGEF	TBL2	LTF
PAQR4	SPATA17	MAGED1	WDR25	RRAGB
GIPC1	RTKN2	RFXANK	CXCL16	MTFR1
KCNN4	ZNF443	ALG1L	PPME1	AP1M1
TMEM45B	UBE2T	GRAMD2	MFSD5	TTC36
TMEM177	EVA1A	ALG3	ANKS6	PCSK7
ERVMER34.1	NOXA1	TNNI3	MRPL38	TMTC3
CACFD1	TP73	YIPF2	PDZD11	FAM214B
NABP2	ELMO3	CCNA1	ZGPAT	SIK3
ELMO3	E2F5	TMEM184A	WDR73	LDHA
NGEF	C1orf116	FUT3	MRPL27	CA13
MAGED1	ERP27	DCHS2	SSRP1	TTC38
RFXANK	LIPH	FAM86C1	MMEL1	PTHLH
ALG1L	MAZ	CLDN7	TAX1BP3	PTCD2
GRAMD2	CDCA3	CALML5	RPL26L1	SIN3B
ALG3	CD9	ZNF572	C14orf119	COX17
TNNI3	BMPR1B	HIST1H2AE	ETV6	TINF2
YIPF2	ATP6V1B1	CTCFL	GFER	OSGIN1
CCNA1	TMEM184A	HYOU1	HAPLN3	CNOT6L
TMEM184A	BICD1	ATAT1	CHMP1A	CD81
FUT3	MREG	TMEM141	GRID2	PPP2R3C
DCHS2	HKDC1	ASPSCR1	ENO1	METTL9
FAM86C1	PIGU	KLC3	PARL	SNAPC1
CLDN7	UNC13D	ZNF93	NCCRP1	TM6SF1
CALML5	CBX2	ACP6	ORAI2	TRIM61
ZNF572	PPP1CA	HIST1H2BD	METAP1	TCTA
HIST1H2AE	TFR2	KIAA1217	PSMD4	MT-CO2
CTCFL	TROAP	SAPCD2	ARMC6	ARMC8
HYOU1	WDR72	CHTF18	B3GALT6	S100A9
ATAT1	SLC24A2	PPIH	GALK1	HERPUD1
TMEM141	CLDN7	MTL5	MRPL28	ADAM22
2012-09-02	ZBED2	PAK6	RBMX2	VENTX
ASPSCR1	STYK1	CLDN4	SCAMP3	TANGO6
KLC3	ZNF707	TRAIP	ENTHD2	NUMBL
ZNF93	TLDC2	NPAS2	RBBP7	KIFC3
ACP6	CCNA2	SAMD1	DUS1L	DECR2
HIST1H2BD	CLDN22	ZBED2	GUK1	ERP44
KIAA1217	CDC45	KDM4D	GPSM1	E2F6
SAPCD2	LAMP3	SH3YL1	NSMF	ANO8
CHTF18	EPN3	C6orf15	ZMAT5	ATP6V1E1
PPIH	LAPTM4B	PODXL2	FBXO44	NOL3
MTL5	CCNA1	SOX9	IL32	CEACAM1
PAK6	CORO2A	TMEM130	ZC3H3	USP7
CLDN4	MELK	LMO7	ODF2	GPR176
TRAIP	TMEM45B	PRSS3	UBAC1	UBC
NPAS2	CCNE1	SPOCK2	C17orf72	AFAP1
SAMD1	MYO3B	EPHX4	KIAA2013	GJC2
ZBED2	EZH2	BANF1	NDUFA13	REXO1
KDM4D	LAMP5	WFDC2	CCT7	ITGAM
SH3YL1	2009-09-01	RAB3B	MICU1	DEF8
C6orf15	ZNF74	ACSM3	PSMB3	CCDC88A
PODXL2	PRRG2	UBXN10	DGKZ	C4orf19
SOX9	LEPREL4	KLK14	SMYD5	IFFO1
TMEM130	SAPCD2	LSR	CCDC154	CHIC2
LMO7	PLK1	PSRC1	PGP	HEYL
PRSS3	MOXD1	TIGD1	EMG1	IER3
SPOCK2	PLK4	PACSIN1	DTNBP1	LZTFL1
EPHX4	FKBPL	CACNG4	ZCCHC17	ISM2
BANF1	ZNF681	AHCY	KCTD5	DCLK2
WFDC2	SPSB2	KIAA1210	UCP2	2007-03-01
RAB3B	TMPRSS6	EHF	FAM118B	IKBIP
ACSM3	RNF8	PNMA6C	DDX54	ITGA5
UBXN10	CENPF	MPPED2	UBE3D	RBM7
KLK14	RITA1	NFE2L3	H1FX	USP38
LSR	RAD54L	AP2M1	TRIB3	CD300E
PSRC1	SLC29A3	GPR143	ALB	IL24
TIGD1	SMPX	KDM1A	B4GALT7	SMAP2
PACSIN1	QPCTL	BCAM	SNRNP40	NYAP1
CACNG4	SLC35C2	HAGHL	JMJD4	REEP6
AHCY	CEP55	FOXP3	UBFD1	ERVFRD-1
KIAA1210	NUP62	CDC42BPG	TRABD	ZNF697
EHF	ALPK2	DEPDC7	ZFPL1	DISP2
PNMA6C	OIP5	TFPT	FLVCR1	GGT5
MPPED2	COPS7B	PSMG3	S100A13	RCL1
NFE2L3	NUSAP1	CDT1	SNRPA	CTDSP2
AP2M1	TTC30B	RASL11B	MRPS2	MTFR1L
GPR143	MMP13	LCMT1	NUDC	IQCJ-SCHIP1
KDM1A	GTF2IRD1	RFC4	CCDC57	FAM204A
BCAM	ATPIF1	WDR72	FTSJ1	FAM163A
HAGHL	POLG2	LRRC8D	FAM32A	DNAJB1
FOXP3	LPAR3	DAPL1	SUMO2	C19orf35
CDC42BPG	POC1A	FZD10	RABIF	ARG1
DEPDC7	FAM213B	SURF2	SUPT4H1	ICMT
TFPT	ZNF793	RITA1	TUBA1B	RPS27L
PSMG3	ZWINT	XYLT2	ATAD3C	ZNF385A
CDT1	CTHRC1	BCAS4	WIBG	GTF2IRD2
RASL11B	SOX11	ST6GAL1	PRMT1	B3GNT1
LCMT1	HIST2H4B	FADD	GPR84	SEMA5A
RFC4	B4GALNT4	CYHR1	SF3B4	SIRT2
WDR72	CYFIP2	SPATA33	NOX4	CDK9
LRRC8D	SLC29A2	GGT6	ILF2	PROK2
DAPL1	UBE2C	TLL2	UNC119	SLC7A4
FZD10	MYL6B	C1orf74	FAM86A	UGDH
SURF2	PALM3	BACE2	SPTSSB	IFI27L1
RITA1	LRRN2	MGME1	SNRPB	UQCRC2
XYLT2	ALCAM	MOGS	PDXDC1	SPESP1
BCAS4	C11orf49	CREB3L4	GLI4	BIRC2
ST6GAL1	NIF3L1	SLC4A11	SLC25A22	NDFIP2
FADD	DNMT3A	ALDH18A1	LRRC6	TAC1
CYHR1	SCGB1D2	NOTUM	PSMA4	TMEM154
SPATA33	ZSCAN16	TMED9	ARPC1B	NINJ1
GGT6	TK1	NOXA1	DGCR6L	MYL12A
TLL2	LPAR2	CRB3	RAB40C	ZSWIM7
C1orf74	SCGB2A1	FGFR2	MBOAT7	FAM114A1
BACE2	HUNK	FUT2	DCPS	NAAA
MGME1	CMTM7	FAM69B	AKR7A2	EDA
MOGS	SLC6A12	TRPV4	TRMT112	IQSEC3
CREB3L4	RIMS4	ABHD17C	PABPC1	SLC25A53
SLC4A11	CEP89	TEKT2	LRRC20	BDH2
ALDH18A1	ARL4C	FKBP10	TSEN34	FMO1
NOTUM	RPS21	DBNDD1	RNPS1	GLCE
TMED9	KIF23	LDB1	UBA1	SERPINF1
NOXA1	DEDD2	INTS4	COX7A2L	CEACAM4
CRB3	CNTN5	C16orf93	TMED1	RGMA
FGFR2	OXTR	PYCRL	TRPM4	EMP3
FUT2	KRT17	ANO7	ALG8	GLT1D1
FAM69B	SFI1	PRRT3	MRPL37	LBP
TRPV4	FOLR1	ARMCX6	ZFYVE27	ETF1
ABHD17C	RAD54B	TBC1D7	SLC25A19	ABHD1
SUSD2	SYNGR3	DPM2	ZFAT	MSANTD2
SERPINA5	FOXM1	EXPH5	TTC1	NFYB
TEKT2	CYBA	BCL9	DDA1	PRICKLE4
FKBP10	GAPDH	UBL4A	CCT4	GTF2B
DBNDD1	TPD52	SLC34A2	AP2S1	PSEN1
LDB1	TMC4	HOXB2	SCLY	PRMT10
INTS4	MEIS1	COL13A1	AGAP2	ABCB7
C16orf93	WNT7A	SNRPC	PLEKHA5	EFNA5
PYCRL	FADD	FAM203A	CACNB4	KCNA6
ANO7	PYGO2	CCDC8	TBX21	SYN1
PRRT3	MUC1	CAPN9	PIP4K2A	MED14
ARMCX6	RCC2	AOC1	TDRD3	EPHB6
TBC1D7	FUT8	LAMC2	TMEM27	PBXIP1
DPM2	BIK	NXN	BBS10	ZFYVE28
EXPH5	ALG1L	DRP2	NAA16	WWOX
BCL9	ZNF440	CILP2	SMPDL3A	DHX38
UBL4A	CLDN3	C20orf96	CD226	2006-03-01
SLC34A2	TFPT	GPR27	C11orf21	HOXA5
HOXB2	PSMG3	POLR2G	STON1.GTF2A1L	HAAO
COL13A1	KIF20A	PAEP	CBLB	CYP1A1
SNRPC	COL9A2	TMEM9	SLC30A3	UBE2A
FAM203A	HTR3A	RNASEH2A	ACKR4	MTHFD1
CCDC8	KIF4A	GSTP1	RCOR3	GPR3
CAPN9	RFXANK	CP	NUTM2D	RASL10A
AOC1	NMU	FRMD5	PPM1K	APOL4
LAMC2	ITPA	MMP1	KIAA0825	OAF
NXN	DCLRE1C	RTP4	ZNF831	CYP4B1
DRP2	TMEM63C	LRRC56	ZNF181	KLLN
CILP2	REEP4	CD9	HOXA6	NPR1
C20orf96	INPPL1	CES3	ENTPD4	UBN1
GPR27	FKBP10	GOLT1A	NUDT13	NDNF
POLR2G	CRABP2	PIANP	KBTBD8	MFAP5
PAEP	EPYC	ITGA11	FBP1	GLRX2
TMEM9	ZNF687	CCDC103	ZNF75D	MTIF3
RNASEH2A	TUBB4A	MYT1	ANKRD44	LACTB
GSTP1	HDAC1	APEX2	GTF2A1	EMR3
CP	CDSN	THBS2	HTR2A	RNF123
FRMD5	CDCA8	METTL7B	EDN1	BSDC1
MMP1	ZNF625	ADM2	AP4S1	SPOCK1
RTP4	CCDC24	GMPR	PEX12	GFRA3
LRRC56	RCOR2	ZSCAN16	XPC	GTPBP6
CD9	NCMAP	SLC30A2	CAPN3	ULBP2
SLC35B2	NOTUM	ASPHD2	FBXO39	UBE2V2
CES3	WNT10A	TRMT12	UBE2R2	PCDHA3
GOLT1A	ZNF675	TUBB4A	ZNF274	FHOD1
PIANP	C15orf52	HMGN2	ZNFX1	PZP
ITGA11	DRP2	CHMP4C	FBXO36	H3F3B
CCDC103	KIF1A	KCNG1	SLX1A	HIP1R
MYT1	ERBB2	UBAC2	NEURL4	ANXA7
APEX2	RPS18	ARL4C	2016-09-03	RGS3
THBS2	UBD	PALM3	LEPROTL1	EML6
METTL7B	PPAP2C	TSEN54	SETD1B	SLC45A1
ADM2	RANBP17	ZSWIM4	NOL8	DIRAS3
GMPR	PDIA4	B3GAT3	LGALS4	IFFO2
MATN3	SYTL1	VCAN	MYT1L	MYOM2
ZSCAN16	PRSS8	P2RY2	GNB4	VTI1A
SLC30A2	MAST1	TP73	KLRD1	POMZP3
ASPHD2	PPIH	CAPSL	KIAA0947	PENK
TRMT12	LIMS3	SKAP1	PRKAA2	NISCH
TUBB4A	TRIM11	KLHDC8A	ANKRD50	NFATC1
HMGN2	DNASE2	TFAP4	FAM133B	FBXL12
CETN2	ATXN7L3B	NPW	ZNF436	SLC25A42
CHMP4C	PRPF6	LIPH	KLHL28	BLCAP
KCNG1	ZFP82	PDIA4	ZNF131	QRICH1
UBAC2	LRRC45	PSD4	FAM171B	IL13RA2
ARL4C	CACNG4	C1QTNF6	RCBTB1	LRRC32
PALM3	BIRC5	CYP24A1	PTGFR	WNT5A
ETV5	SCNM1	TOP1MT	SLC25A36	S100P
TSEN54	DDOST	RMI2	RINT1	MXD4
SFRP5	KCNJ10	SDHAF1	RLF	PLA2G5
ZSWIM4	SLC35F2	IGFBP2	TBX2	AGAP1
B3GAT3	DDX41	FUOM	TCP1	NLRP6
VCAN	CRB3	NMRAL1	PCDHGB2	EXTL3
P2RY2	ZNF816	ASF1B	PTCH2	AIG1
TP73	KLHDC9	DNAL4	ZNF507	CNTNAP2
CAPSL	KIAA1324	TMPRSS2	MBD5	WTAP
SKAP1	EXO1	LPAR3	SP4	ANAPC13
KLHDC8A	MORN4	LRRC45	PUM2	NR4A2
TFAP4	VEPH1	HMGA1	STT3B	NUDCD3
NPW	HMGB3	GDNF	VRK2	SMAD7
LIPH	RAD51AP1	MUC1	SAMD9L	COPS8
PDIA4	XRCC3	RCC2	HECTD3	THPO
PSD4	IQCD	RAI14	MDM2	TTLL10
C1QTNF6	CDCA2	AP1M2	ABCA7	MOB3A
CYP24A1	XYLT2	PRAF2	PACRGL	CADM3
TOP1MT	HSD17B14	PPP1R16A	CD38	C1orf123
RMI2	ZNF581	ABHD11	ZNF615	RGS16
SDHAF1	KIAA0907	RPL8	SWT1	SLC25A45
IGFBP2	DEPDC7	E2F5	IL6R	TNFRSF1A
FUOM	MIS18A	HS6ST1	TBK1	MSX2
NMRAL1	SLC30A2	TRIM46	SUSD1	NNMT
ASF1B	VTCN1	CTXN1	ZNF136	EIF2S1
DNAL4	ZNF184	DYRK2	PRPF18	PPT2
TMPRSS2	2009-03-01	BICD1	RANBP10	RAB14
LPAR3	DLEU1	FXYD7	ZNF543	MOB2
LRRC45	UNC5B	CEP72	PDK1	KCNH5
HMGA1	C19orf48	CORIN	FBXO18	KIAA0895L
GDNF	TTLL9	RPN2	LRRC3B	VCAM1
MUC1	WDHD1	BAIAP2	RNGTT	ADAMTSL5
RCC2	COPG1	FAM155B	RANBP6	SLC9A5
RAI14	RHEBL1	CHN1	RAD17	ZNF660
OXGR1	COL13A1	LRRC73	SEC14L5	SLC43A1
AP1M2	OSBPL3	LAGE3	PRDM2	UBE3A
PRAF2	ZFP64	RPL18A	MCOLN3	SYCP2L
PPP1R16A	DLGAP5	OCA2	CRLF3	PDLIM1
ABHD11	PRR19	LY6E	GHITM	PIP5K1C
RPL8	ARMCX6	CELSR1	RNF170	CACNA1C
E2F5	ZKSCAN4	CAPN5	ZNF699	PRKD1
AEBP1	SPC25	FAM71E1	GATA3	DYNC1I1
HS6ST1	PLEKHN1	RPGRIP1L	GOPC	SNX33
TRIM46	CD1A	GNB1L	CCL18	RCBTB2
CTXN1	MFSD3	PKMYT1	THAP5	C3orf52
DYRK2	NCAPD2	RANBP17	ZNF721	ST7
PTTG1IP	EDAR	ST5	TCHP	ARAP3
BICD1	CHAF1B	MAN1B1	SP140L	PPP1R1B
FXYD7	FBN3	SLC50A1	TMEM212	CDYL2
CEP72	FAM86C1	CCDC74B	ZNF17	GTPBP2
NRAP	ST6GALNAC2	ATPIF1	ZCCHC8	CLEC4D
CORIN	KLHDC8A	TRAF7	RTCA	NCF4
RPN2	XKR7	BAK1	CBR4	ATP6V0A2
BAIAP2	SHCBP1	NDP	KIAA1755	SERPINB10
FAM155B	ESCO2	ZNF691	KRBA2	IL13RA1
CHN1	HMMR	ZMYND10	TOP3A	PMM1
LRRC73	CDCA7	TCEA2	SACS	SC5D
LAGE3	EME1	BCL11A	ATG2A	CPNE5
RPL18A	SPC24	PLCD3	C6orf211	TMEM11
OCA2	RPUSD1	SLC2A9	PAPOLA	LMOD1
LY6E	DPY30	LBH	CORO7.PAM16	ARID5A
CELSR1	FOXS1	TJP3	CCNG1	PGRMC1
CAPN5	TUBB	NALCN	XIAP	ETV3
FAM71E1	CDH6	PUF60	RIC3	PTCHD4
RPGRIP1L	CD47	LRRTM1	DDX60L	NDUFS4
GNB1L	SLC39A4	SHROOM2	ANKRD17	AXL
PKMYT1	SNRPC	CALR	FAM21C	SH3RF3
RANBP17	UBXN10	ELF3	PI4K2B	NCKIPSD
ST5	FAM187A	PNKD	DIP2B	LIMS2
MAN1B1	C1orf35	FAP	KPNA6	PCBP1
SLC50A1	VANGL1	MKS1	TDRD7	CLEC4E
CCDC74B	RGS14	PRIM2	MAP2	TLR2
ATPIF1	ERCC6L	KIF5A	ZNF483	LARP1B
TRAF7	PFDN6	ZSCAN9	GMFB	CHADL
BAK1	ZBTB42	TBCB	TRMT2B	TAF13
NDP	DEPDC1	RABL5	CCDC25	TSHR
ZNF691	MORN3	DCAF15	PLEKHA8	COQ10A
ZMYND10	SCNN1A	FAM171A2	ZCCHC3	CHP1
TCEA2	KCNH2	KCNK9	ZBTB25	ANKRD11
BCL11A	CPLX2	UPK2	ZNF417	TENM3
PLCD3	FANCD2	RAB15	MIEF1	ARFGAP3
SLC2A9	PPEF1	CGREF1	WDR36	ENTPD3
LBH	HMGN2	MND1	ESF1	PRDM11
TJP3	HIST1H2BD	NIPSNAP1	SRPK2	LDLRAD4
NALCN	H1F0	ZNF579	FNBP1	IL18RAP
PUF60	CLDN4	DNAJC9	PDPR	CC2D2B
LRRTM1	IGFBP2	C7orf49	CBLN3	MDGA1
SHROOM2	PRSS1	TTC39A	B3GALNT2	ZNF189
CALR	PLCH1	PATZ1	RAPGEF6	RRAS
ELF3	COMP	HID1	PON3	GPC6
PNKD	KRT23	MARCKSL1	ZSWIM5	KCNJ15
FAP	GALNT5	TRIT1	SHPK	IL4R
MKS1	FBXL19	SEMA7A	THAP1	IL18R1
PRIM2	KDM1A	TNFSF4	TMOD3	MLX
KIF5A	C3orf67	DDOST	LINC00999	YBX2
SWI5	CSTF1	PKIB	ANKRD36	CASK
ZSCAN9	CASP6	SYTL1	XCL2	MORF4L1
TBCB	SLC2A9	SRD5A1	BRWD3	RPP14
RABL5	CD82	VPS37D	KMT2A	OPLAH
DCAF15	ALPP	CENPM	FLCN	2008-03-01
FAM171A2	CTCFL	CNNM4	DTWD2	NMNAT2
KCNK9	RNASET2	EDAR	VCPIP1	ANKRD13B
UPK2	LCN12	CAMSAP3	ANKRD36C	CREM
RAB15	IGF2BP3	FNDC1	LRRC58	BATF3
CGREF1	PLEK2	WDR91	PUM1	SMOC2
MND1	LAMB3	SLC39A11	BIRC6	ABL2
NIPSNAP1	LRP8	HES2	NUDT6	MGAM
ZNF579	ZNF14	OBP2A	DHFR	IL10
DNAJC9	UQCC2	CACNA1E	ATPAF1	RAB9B
C7orf49	FAM64A	CYP4F11	ABCG2	NBPF15
TTC39A	CELF4	NUDT1	SLFN12L	TREM1
PATZ1	MKI67	HAPLN4	UTP20	MAP6
HID1	HYLS1	EVPL	STAM	PIWIL2
MARCKSL1	BLM	MCM5	PCDHB12	CDIP1
TRIT1	SKA1	FANCF	SLU7	ING2
SEMA7A	ISYNA1	C15orf48	EML2	LILRB3
TNFSF4	HELLS	CPNE7	LZIC	PRPS1
DDOST	IL17RB	CDR2L	JMJD7.PLA2G4B	WFIKKN2
PKIB	KNOP1	ADCK5	MCPH1	PYURF
SYTL1	HAPLN4	C17orf70	C12orf55	NDUFAF3
SRD5A1	GPR68	POLG2	SLC35E2B	SDK1
VPS37D	NELFA	TOMM34	ERMARD	MAFG
CENPM	C20orf96	KRT86	RBM15	MAT2A
CNNM4	KDM4D	VEPH1	USP30	LITAF
EDAR	STAP2	APOC2	COL4A4	FADS1
CAMSAP3	PSAT1	GAPDH	FCHO2	ANKRD42
FNDC1	WDR54	SCG2	KATNA1	TSPAN15
WDR91	ZNF610	ANKRD65	SUCNR1	CDH20
SLC39A11	WFDC2	RNFT2	PPP5D1	TMEM35
HES2	NMRAL1	HPDL	SIKE1	PDE4D
OBP2A	KIF15	ENKUR	PAXBP1	RNASE1
CACNA1E	HIST1H2BN	GMNC	SCYL2	CMIP
ITGB5	ZNF691	PIP5KL1	TMEM116	KIAA0040
CYP4F11	TBX19	CBX2	RIT1	DIO3
NUDT1	TMEM79	ST6GALNAC1	DNAJC25.GNG10	GPRC5A
MMP3	SOX9	TEC	ERI2	UACA
HAPLN4	HPDL	RPL35A	NUDT12	JDP2
EVPL	SLC7A11	AKR1A1	CDKN1B	TSHZ3
VPS28	VPS37D	DGUOK	EFCAB13	CCND3
MCM5	CAMSAP3	GPX7	RNASEK.C17orf49	UBB
FANCF	ANP32A	COPZ1	EML5	HSD17B6
C15orf48	AKR1A1	KCNK13	HPS4	SLC39A8
CPNE7	VGLL1	FSCN2	ZBTB40	ICAM1
CDR2L	MARCKSL1	TMEM238	TCEA1	CRELD1
ADCK5	NEIL3	NTHL1	DDO	RABGAP1
C17orf70	BCAM	SLC16A3	PLA2G4C	TMEM248
POLG2	LSM4	XDH	WRN	TKT
TOMM34	CHST10	STAP2	N4BP2	COPZ2
KRT86	JUP	C2orf81	RNF138	MAPK12
VEPH1	ELF3	IQCC	ZC3HAV1L	CST3
TREX2	CLEC5A	IL20RA	RPS6KC1	TBC1D25
APOC2	RNF5	TCTEX1D2	TBC1D23	CNEP1R1
GAPDH	SLC39A11	ANAPC15	C4BPA	TPST2
SCG2	SNRPD2	UGT8	LINC00998	HIP1
ANKRD65	CAPS	SCNM1	ASCC3	MRGPRF
RNFT2	SNAP47	CD276	HCN1	PDGFD
HPDL	DPEP1	CHRNA1	IGFN1	BICC1
ENKUR	MICB	TNFRSF19	PTGDR	DNAH9
GMNC	XXYLT1	FAM110A	PCNP	NXF3
PIP5KL1	EFNA3	ADAM28	CDKL5	KCNK3
CBX2	RAD18	CCDC137	PPP1R21	VEGFB
ST6GALNAC1	IL21R	CNPY2	STX16.NPEPL1	TRABD2B
TEC	SLC25A38	ACOT8	HAUS6	CDC42EP3
RPL35A	ZFP62	DDR1	DDX6	IGFBP4
AKR1A1	MAPK8IP1	TNNC1	BLVRB	POLR2L
DGUOK	ZNF439	RUNX2	FSIP2	SRRM2
GPX7	E2F7	SPATS2	ERVFRD.1	FAM19A2
COPZ1	ZNF526	HIST1H2BN	NUDCD2	QDPR
KCNK13	NREP	DRD2	PTPRK	MOV10L1
FSCN2	IDH2	BIK	CAPRIN2	MPHOSPH6
TMEM238	ZDHHC13	CDCA5	CCNT2	SRSF3
NTHL1	FAM174B	ATG9B	ADAM9	TMEM109
SLC16A3	CCDC160	KRT16	SETD5	SRF
LGSN	ADAMDEC1	HTR3A	ZNF318	OMD
XDH	GCAT	STX6	ARPC4.TTLL3	MMP24
STAP2	INHBA	F12	SF3B1	MXD1
C2orf81	GABRA3	EPPK1	MT.CO2	ZFAND3
SHISA2	CLDN9	ZNF774	HOXB6	MLYCD
IQCC	KIAA1211	DEFB1	NR1D2	IL17D
IL20RA	RRM2	CCDC148	PRRC2C	RPS6KL1
TCTEX1D2	KIF18A	GCAT	KIAA1107	TNPO2
ANAPC15	GPR89B	ZNF385C	TPCN2	INO80C
UGT8	AOC1	MAPK13	CARF	MAN2B2
SCNM1	CST1	FBXL16	SLC17A5	CSTA
CD276	CBX1	ATXN7L3B	CCDC7	PDGFB
CHRNA1	TBC1D31	WNT7B	PCDHAC1	ATP6V1E2
TNFRSF19	SETDB1	IQCD	MINK1	ZNF878
FAM110A	EXOSC5	PKN1	KPNA5	TIMP2
ADAM28	FIBP	ANKLE1	C7orf25	TMEM71
CCDC137	USP28	RIBC1	P2RY1	INPP5E
CNPY2	ANKZF1	VWDE	SRSF10	HADHA
ACOT8	ALG3	FAM83H	CCDC18	PDLIM5
DDR1	PDCD2L	SMPDL3B	L3MBTL3	FMOD
TNNC1	RPS6KA1	SLC6A11	FANCM	C7orf26
RUNX2	EMC10	POC1A	DCAF6	FSTL3
SPATS2	LRRC46	MEIS1	PDE3A	SCN2A
HIST1H2BN	NSUN5	GINS2	PRPF39	MRC1
DRD2	DBNDD1	SV2A	ZFR	ADI1
BIK	AP1M2	CAPG	NIPBL	AAMDC
CDCA5	RCC1	YIF1B	CBLL1	FAM156B
ATG9B	KIAA0101	KSR2	TMEM209	CHRNE
KRT16	OVOL1	DNTTIP1	SCML2	ZNF812
HTR3A	APEX2	TUBB	IPO8	NFKB1
STX6	MCM7	TIAM2	RFC1	SLC25A28
F12	ITM2C	QPRT	PMPCB	RC3H2
EPPK1	RNFT2	INO80B	ZKSCAN1	RNASEK-C17orf49
ZNF668	ENTPD8	SCGB2A1	UNC45B	TADA2B
ZNF774	GPR27	TMEM106C	NBPF14	COL28A1
DEFB1	PRKX	CHPF2	PELI2	IGFBP7
CCDC148	RPS19	COPG1	C9orf64	ASB9
GCAT	RPS10	LYPLA2	DMXL2	CXorf57
ZNF385C	LTB	DPAGT1	GALK2	RASSF4
MAPK13	DTL	FAM58A	C1orf101	CCNI
FBXL16	LYPLA2	TBC1D2	PPP1R3D	KLHL18
ATXN7L3B	ZNF607	AP1S1	NTN3	SLC39A14
WNT7B	DNAL4	PRR3	IRAK1BP1	DENND1A
IQCD	LMTK3	SDSL	USP6NL	USP2
PKN1	YIF1B	PTK6	CDK19	MATN4
ANKLE1	VAV2	CORO1B	FAM151B	GNAI2
RIBC1	C9orf16	C15orf27	TRIM9	EPDR1
VWDE	SPOCK2	TMEM206	TPR	GPT2
FAM83H	C15orf62	PRKCI	LRRC40	TMLHE
SMPDL3B	ZNF296	CCDC11	SENP7	JAM3
SLC6A11	POLE2	CAPS	2016-09-01	THBS1
POC1A	TMEM141	C14orf1	C5orf51	FAH
MEIS1	ACOT11	STRA13	CROT	HPGDS
GINS2	ZNF85	ZWILCH	FKTN	PIM3
SV2A	RSPH1	FOLR1	PTER	ARMC5
CAPG	GEMIN2	PLD4	ARL5A	PARP3
YIF1B	NR2F6	AGTRAP	MBLAC2	GALNT18
KSR2	ZNF492	PRKCZ	CETN3	CASKIN2
DNTTIP1	FEN1	DLEU1	GBAS	APCDD1
TUBB	CDK18	PNCK	ARHGAP12	CD163
TIAM2	ZNF503	CHRNA3	CSNK1G3	TECTA
QPRT	TLCD1	RAB39B	IDH1	JOSD1
INO80B	TMEM223	FAM83A	METTL4	EIF5A2
SCGB2A1	RPGRIP1L	TM6SF2	SLC25A24	SLC46A3
TMEM106C	DYRK1B	PRR19	ZNF221	WFS1
CHPF2	PCNXL2	GPS1	CNOT4	GORASP1
COPG1	KIF20B	HHLA1	SCIN	EMC7
LYPLA2	ZWILCH	CASP2	KIAA1468	OLFM2
DPAGT1	CENPA	IQCA1	ZNF397	FOXF1
FAM58A	AGR3	AMY1B	BTBD8	SERTAD1
TBC1D2	KLHDC7B	PDRG1	FXYD2	PLEKHG5
AP1S1	FAM111B	TMEM102	GOLGA8Q	SIRPA
PRR3	SH3BP5L	COPS7B	FPGT.TNNI3K	DNAJC3
SDSL	PCNXL3	PGM2L1	GTF2H3	C6orf89
PTK6	PRKCI	SPSB2	LYRM2	PCDHGA2
CORO1B	ADM2	TIGD5	AEBP2	RBKS
C15orf27	BARD1	SLC7A3	XPO4	ACKR3
TMEM206	BHLHE41	P4HB	TRRAP	LRP3
PRKCI	PRR7	FBXL19	ZFP2	DCTD
CCDC11	CDK4	FANCB	ZNF582	STX1B
SMIM1	NVL	TMEM51	RAD50	GTF2H1
CAPS	SLAIN1	ARFGAP1	SEPSECS	TMEM164
C14orf1	SPP1	CYBA	2016-03-07	CYR61
STRA13	DTYMK	PUSL1	PCDH10	SAA2
ZWILCH	CHCHD6	PDIA6	C2orf49	SPRYD3
FOLR1	KLK14	CDK18	ZCCHC11	GADD45A
PLD4	RARG	FBXO16	NR2C2	ATF4
AGTRAP	KREMEN2	COL7A1	DOCK7	PRDX6
PRKCZ	CACFD1	C15orf52	TNRC6B	SORBS3
DLEU1	SLC22A18AS	SLC9A7	GPR75	ELOVL2
PNCK	ANO9	OSBPL7	DNAJC13	PAXIP1-AS2
CHRNA3	FANCI	KLHL35	MPHOSPH9	IL8
RAB39B	HMGA1	CSTF1	TNKS	F2RL3
FAM83A	KIF18B	NEK6	AGAP4	FAM76A
TM6SF2	CBS	GTPBP3	NKX3.1	DHRS7
PRR19	RAB39B	HIST1H2BG	TMEM161B	ATP1B3
GPS1	CCDC77	LIG1	EPC2	APBB1
HHLA1	GNPDA1	CDH2	GCC2	TRIM4
CASP2	DFFB	BHLHE41	CASP12	DNAJA4
IQCA1	PTDSS1	LY6G6C	ZNF704	NUDT9
AMY1B	LRRTM1	HSD17B14	MTMR8	TMEM17
PDRG1	C2orf81	DNMT3A	MBNL3	TACC2
TMEM102	TBCB	COL23A1	TXNDC16	NID2
COPS7B	CCDC137	ACBD7	ARHGAP35	SGCA
PGM2L1	GSG2	MAGED2	HLA.E	CHSY1
SPSB2	RASSF9	DPP3	RICTOR	PDE4A
TIGD5	CDKN3	DSCC1	ZNF45	CRAT
SLC7A3	HAUS5	OTUB1	TDRD6	GNAO1
P4HB	VDR	AGBL5	BIVM.ERCC5	RNF41
FBXL19	C19orf40	ARMC9	POC1B.GALNT4	PDCD7
FANCB	PRUNE	PSTK	KRT1	COLEC12
TMEM51	GEMIN6	ZNF212	FECH	FPR2
ARFGAP1	HENMT1	CDK5	ZADH2	RASGRP4
CYBA	HEATR6	TSTD1	ABCB10	MAP1LC3A
PUSL1	ESPL1	TREX1	AGBL3	TNFRSF10C
PDIA6	BSCL2	STMN1	PGBD4	CFH
CDK18	TOP2A	FUK	PHIP	MXRA7
FBXO16	SLC34A2	RNF187	TANC1	AGXT
COL7A1	ZNF713	RAP1GAP	C5orf42	CSNK2A2
C15orf52	GPX7	PSENEN	SLFN5	BEGAIN
SLC9A7	MBOAT1	C11orf82	BET1	ELOVL3
OSBPL7	SLC6A11	GPC2	ARID4B	SMARCA1
KLHL35	CDK1	C3orf67	C2CD5	PDGFRB
CSTF1	FA2H	RPN1	FAM106A	MESDC1
NEK6	CASC5	MCM4	NBPF12	C1R
GTPBP3	DPCD	NXNL2	PCNT	CTDSPL
HIST1H2BG	METTL7B	EHD3	ALS2	WISP2
LIG1	ZNF33B	RNASET2	UBXN4	VCL
CDH2	ESR1	CDH11	RIMS3	TUBB2A
PGLS	PNMA6C	AP3M2	SP3	FCGR3B
NKAIN4	SIPA1L3	LRP8	PCDHGA11	MAN2C1
BHLHE41	TTC39A	CEP89	AGAP10	KANK4
LY6G6C	CSK	USP43	SMCR8	PRKACA
HSD17B14	C11orf80	DRC1	TFDP2	INHBB
DNMT3A	ZNF285	TRIM11	KLHL11	ADCY2
COL23A1	CDHR1	GALNT5	PHC3	PPP4R1
ACBD7	TRAM1L1	PFDN6	TC2N	SMURF1
PRR13	ARHGAP11A	JUP	CTC1	ATP6V0A1
MAGED2	TPI1	RAD51	MT.CO3	CD151
DPP3	GSTP1	DDX41	ZNF37A	SYDE1
DSCC1	TMEM52B	ZFP92	MLLT10	NEXN
OTUB1	GABRG3	CPSF3	PPP1CC	CALD1
AGBL5	HMGA2	SPAG17	CAAP1	HYKK
ARMC9	C1orf112	CARD14	TNRC6C	LRRC8A
WISP1	TTC9C	SLC25A38	2016-03-05	TESK1
PSTK	BACE2	KIF2C	CHMP5	FZD9
ZNF212	MYLPF	TRIM27	IPP	GRIN2C
CDK5	POLQ	DPYSL3	WAC	S100A12
TSTD1	KSR2	STON2	FAM47E.STBD1	MESP1
IFT52	DMKN	ZBTB42	ZSCAN25	KIAA0247
IGFL2	CALML5	INA	2016-02-29	RGCC
TREX1	CLNS1A	KCNS1	MT.ND3	NOS3
STMN1	VOPP1	LSM11	NPIPA5	DUSP5
FUK	MCU	MCM3	ZNF347	ZNF331
RNF187	CENPH	EPHB2	EPG5	C11orf63
RAP1GAP	SLC7A3	SMKR1	2016-03-02	SESN2
PSENEN	TOP1MT	SYNDIG1	CTRC	GAS2L1
C11orf82	E2F2	TIGD7	ZNF407	SERPING1
SYT8	STX6	KIAA1324	ATP9B	CXCR1
GPC2	MROH6	TCF3	SBNO1	FLYWCH1
C3orf67	CAPSL	BOP1	ZNF426	DDX24
RPN1	COIL	DKK2	2016-03-06	MT-CO3
MCM4	CP	DERL3	MT.ATP6	C1S
NXNL2	INA	DLG3	UBA3	FCAR
EHD3	OSGEP	PPIL1	ANKRD26	TBCEL
RNASET2	BCL2L12	HRK	ANKHD1	PM20D1
CDH11	TRIM45	STT3A	MT.ND4	FOSL1
AP3M2	CPSF3	FAM183A	RPA3.AS1	RND1
LRP8	BRSK1	PIGC	RBM41	NLRP3
CEP89	LPO	PIFO	AGPS	TSKS
USP43	TMEM206	POLR2H	WHSC1L1	2002-03-01
DRC1	BNIPL	CHI3L1	HSPB2.C11orf52	CXCR2
TRIM11	SLC12A8	CD82	MICAL3	MYL3
GALNT5	KIAA1210	UQCC2	CCDC132	2011-09-01
PFDN6	CUTA	RHNO1	CYSLTR2	SEMA6C
JUP	SMKR1	C19orf48	PAXIP1.AS2	BCL7B
RAD51	CKS2	SRGAP3	PALM2.AKAP2	REXO2
DDX41	SH3BP1	OTUB2	MT.CO1	PHLDB1
ZFP92	C1orf233	RPS3A	TMEM110.MUSTN1	AREG
CPSF3	UBAC2	KIFC1	NCOR1	FILIP1L
SPAG17	DHDH	NUP93	MT.ND1	ODF3L1
CARD14	NUDT1	SLC51A	EBLN2	CMTM2
SLC25A38	E2F1	ECE2	NBPF8	ADRA2A
KIF2C	SCXA	FA2H	TMED7.TICAM2	ENOX1
TRIM27	GPR19	POU2F3	MED23	RAB11A
DPYSL3	ACP1	SLC6A13	MT.ND2	CES4A
STON2	GPRC5C	COPE	TRDMT1	BOK
ZBTB42	FUT2	NELFA	2016-09-06	SMTN
INA	ALDH18A1	FAM227A	MT.ND4L	PRELP
KCNS1	RACGAP1	KLHDC9	MT.CYB	RAB11FIP3
LSM11	SHROOM2	MAGED4B	2016-03-01	ID3
MCM3	PPP2R4	ZNF860	MT.ND5	TRPC3
EPHB2	GMPR	RASSF7	MT.ND6	ARPC4-TTLL3
SMKR1	CABIN1	SCGB1D2	MT.ATP8	RCAN1
SYNDIG1	CALR	CENPH	2016-09-09	SMIM3
TIGD7	STON2	C21orf58		PARVB
KIAA1324	GINS4	GAL3ST3		NR4A3
TCF3	DNMT1	GLIS2		JUND
BOP1	PIF1	ERP27		PITPNC1
DKK2	CTXN1	ADAP1		TCP11L1
SLC10A3	APITD1	TATDN1		C9orf47
DERL3	DEF6	HES6		SEPN1
DLG3	CCDC138	LSM14B		WWC3
PPIL1	EMID1	RPS18		PRR5
HRK	ZNF257	PYGO2		NTNG1
STT3A	RPS2	PRKX		MSX1
FAM183A	DDX11	SCRIB		NANOS1
PIGC	CCDC11	NAA40		DNER
PIFO	C22orf29	PPP1R14B		CSRNP2
POLR2H	WDR5B	TTYH1		PMEPA1
CHI3L1	CAMK2B	FAM169A		OSBPL5
CD82	MCM3	MORN3		PADI4
LRFN3	MAD2L1	MRPS23		HYAL2
UQCC2	ZNF19	RPS10		SERPINB2
RHNO1	ACOT8	SHF		PPP1R3B
C19orf48	STIL	KRT7		DLG2
SRGAP3	MUC5B	RAD54L		AJAP1
OTUB2	XPR1	DRAXIN		RGS2
RPS3A	TREM2	GABBR2		TEX261
KIFC1	RAP1GAP	STK32C		IMPDH1
NUP93	FRMD5	SLC45A4		ITPKC
SLC51A	CCNB1IP1	C1orf174		NTRK1
ECE2	ASPSCR1	KRT4		ITPK1
FA2H	EPHX3	SPP1		ADAMTS4
POU2F3	GTF2E1	CAMK2B		MYADM
SLC6A13	SCD5	FABP6		RGS17
COPE	DRAXIN	ENHO		2002-09-01
NELFA	MTFR2	ZNF184		ADARB1
FAM227A	KIF5A	C9orf117		SLC2A3
KLHDC9	VPS33B	CCDC78		LCAT
NME1.NME2	GTSE1	NUDT16L1		CNTF
MAGED4B	SPEF1	LTA		IL2RA
ZNF860	CYP24A1	DEGS2		SNAI1
RASSF7	BCDIN3D	DMKN		PDPN
SCGB1D2	RNF121	NT5DC2		COL4A2
CENPH	RYR1	KNOP1		TLE2
C21orf58	GSTA1	MORN4		BTBD19
GAL3ST3	LIME1	ALPP		FFAR3
GLIS2	DSCC1	UBTF		ITPRIP
ERP27	FSCN2	AGR2		PLXNB3
CHAD	DMBX1	DAGLB		PQLC3
ADAP1	ZMYND10	HIST1H2BK		FAM110C
TATDN1	ZNF709	MYO3B		RASL10B
HES6	RFWD3	CDHR1		ADAMTS18
LSM14B	CACNB3	ESRP2		TSPAN3
RPS18	NHLRC1	SLCO1A2		PALM2-AKAP2
PYGO2	SLC9A2	PPP1R35		MPZL1
ZNF114	GPRIN2	GAL3ST4		CPXM2
PRKX	TMEM251	BOLA2		ALDOC
SCRIB	MAGED1	FANCA		KLC1
NAA40	IQGAP3	RNF208		LNX1
PPP1R14B	AP1S1	HM13		S100A8
TTYH1	IMPG2	VAV2		MYH1
FAM169A	EDN2	HIST1H4J		IGF2
MORN3	METTL13	ADAMTS14		TIMP3
MRPS23	ENO2	ZNF19		TMEM110-MUSTN1
RPS10	TRIM46	OXTR		HLA-E
SHF	ROS1	POLR3K		PTX3
KRT7	ZNF683	UNC13D		FGFR1
RAD54L	PRSS33	ING4		PQLC1
DRAXIN	EPS8L2	HMBS		MT-ND3
GABBR2	ZNF724P	CCR8		NR4A1
STK32C	YEATS2	BEST4		BTNL8
SLC45A4	KRT4	UBE2Z		RPA3-AS1
C1orf174	IFNLR1	BEX2		C5AR1
KRT4	KLC3	RABEP2		2004-09-01
SPP1	HECW1	FERMT1		LEPREL1
CAMK2B	TEKT2	TMEM8A		KLHL29
THEM6	E2F8	KIAA1199		MT-ATP6
CRYGN	FAM60A	FAM213B		GDPD5
FABP6	SYNGR2	PHOX2A		MT-CO1
ENHO	MGAT4B	DAP		FPGT-TNNI3K
ZNF184	TRO	C19orf77		MT-ND4
C9orf117	EDARADD	MBD4		MT-ND2
CCDC78	QPRT	ZDHHC12		NKX3-1
NUDT16L1	PRSS3	DCBLD1		2007-09-01
LTA	ERGIC3	CABLES2		MT-ND4L
MVB12A	COA5	TMEM52B		MT-ND1
DEGS2	SH3YL1	ZFYVE19		2003-03-01
DMKN	ZFP30	RUVBL1		HSPB2-C11orf52
NT5DC2	CCDC74B	CLIC6		MT-CYB
KNOP1	MUC15	DEF6		FAM47E-STBD1
MORN4	BBOX1	ENC1		2001-03-01
ALPP	TBC1D2	ETNK2		MT-ND6
UBTF	LOXL1	LIMS3L		MT-ND5
TGFA	APOA1	ZIC1		MT-ATP8
AGR2	TRAF7	ROGDI		2010-09-01
DAGLB	ARRDC1	ACOT11
HIST1H2BK	SPATS2	COMMD7
MYO3B	OLFM3	C12orf10
CDHR1	RASSF7	FAM64A
PDLIM7	ANO7	SLAIN1
ESRP2	POLR2G	H1F0
SLCO1A2	C19orf77	TAPBP
PPP1R35	SFN	KLK8
GAL3ST4	ZNF730	PLEKHN1
IFITM10	ZNF544	DCTPP1
BOLA2	APOBEC3F	ZWINT
FANCA	ST5	SH3BP5L
RNF208	CAPN9	CABIN1
HM13	GLB1L2	EEF1G
VAV2	SMPDL3B	GABRQ
HIST1H4J	ST6GAL1	CCNB1
ADAMTS14	ATF6B	NT5C
ZNF19	SLC9A7	FAM83E
OXTR	WISP3	MLST8
POLR3K	FAP	CD22
UNC13D	PRR11	ABCB9
ING4	SAMD1	MCU
HMBS	ARSE	PPP2R4
CCR8	CENPK	TROAP
BEST4	LAMC2	RPL12
UBE2Z	FBXO46	GEMIN2
BEX2	SYK	MPZL3
RABEP2	RUVBL1	IGF2BP2
FERMT1	FBXL6	DMRT1
TMEM8A	BRCC3	KIAA1549L
KIAA1199	TSSK6	MSI1
FAM213B	RUVBL2	RNF26
PHOX2A	FAM83E	ELFN2
DAP	MSH2	CNTN5
CD74	LCMT1	DTD1
C19orf77	KCNQ5	TICRR
MBD4	SFXN2	TMPRSS3
MEA1	ZNF420	LRRC23
ZDHHC12	HID1	CDC20
MED20	COL8A2	TRO
DCBLD1	CCDC103	LEMD2
CABLES2	MOGS	ATP13A1
TMEM52B	FANCB	XRCC3
ZFYVE19	C12orf65	ZNF627
RUVBL1	DNMT3B	TMEM147
CLIC6	CCDC148	CACNA1F
DEF6	TNNI3	TRIP13
ITGB4	EPHB2	WDR96
SLC44A3	FANCL	NKAIN1
ENC1	TYMS	HIST1H2AG
ETNK2	RMI1	TK1
LIMS3L	ALKBH4	ACP1
ZIC1	SLC17A9	ENPP5
ROGDI	RAB26	ZNF7
ACOT11	NLRP7	PDIA3
COMMD7	ACTL6A	SNAP47
C12orf10	TSPAN17	TRIM26
FAM64A	ZNF300	TMEM79
SLAIN1	NUDT16L1	TNFRSF18
H1F0	ZNF552	USP39
TAPBP	NOA1	PTGER1
KLK8	PDIA5	KIAA1211
PLEKHN1	APOA1BP	FSCN1
DCTPP1	PDE6G	ZNF260
CERCAM	ZNF606	EXOSC4
ZWINT	KIAA1217	PTTG1
SH3BP5L	HIST1H2BJ	SMC4
CABIN1	NARS2	ZDHHC13
EEF1G	GRAMD3	PAK1
GABRQ	CENPO	FOXO6
CCNB1	GREB1	GINS1
NT5C	SUSD3	AURKA
FAM83E	RLTPR	C6orf52
MLST8	PWWP2B	ERBB2
CD22	CLEC18A	ERBB3
ABCB9	RASL11B	POLA2
MCU	GDF1	BBOX1
PPP2R4	ZNF365	RUVBL2
TROAP	DKK2	ZNF280B
RPL12	FAM102A	MREG
GEMIN2	HSF2BP	C1QL4
MPZL3	CARD14	SMARCD2
IGF2BP2	PRSS16	VGLL1
DMRT1	CORO1B	INPP5J
KIAA1549L	MBD4	ZNF750
MSI1	KDM4A	MFSD10
RNF26	NTHL1	NLRP7
ELFN2	BANF1	STRBP
THY1	IQCA1	ACBD6
CNTN5	ISG15	SIX4
DTD1	FBXL22	PACSIN3
TICRR	LRFN1	IGF2BP3
TMPRSS3	SNX32	SHROOM3
LRRC23	CAD	TCEB2
ISM1	ZSCAN12	ENTPD2
CDC20	LINGO1	PSAT1
TRO	KCNG1	CSK
NBL1	ERBB3	ZBTB9
LEMD2	TCF7	PRSS16
ATP13A1	KCNK13	PCNXL3
XRCC3	SPTBN2	DUSP9
VAX2	ZNF682	CACNB1
ZNF627	CKAP2L	SSR4
TMEM147	HYDIN	DCAF7
CACNA1F	NXN	MANEAL
TRIP13	C1QTNF6	UBE2T
TRAPPC9	MRPS23	RAB34
WDR96	XRCC1	BOLA2B
NKAIN1	CPSF1	ABHD16A
HIST1H2AG	LRRC56	SIRT7
TK1	ECE2	NEK2
ACP1	CENPI	POLD1
ENPP5	UNC5CL	NAB2
ZNF7	RGS19	CARD11
MORN2	OSBPL7	TMPRSS6
PDIA3	SLFN13	LIMK2
SNAP47	BRF2	LPAR2
TRIM26	KLHL35	SORL1
TMEM79	PRIM1	TACC3
TNFRSF18	NABP2	ATP6V0B
USP39	DCAF11	TRPM2
PTGER1	CCDC6	MAPK8IP1
KIAA1211	MKS1	TSPAN1
FSCN1	VGLL4	MACC1
ZNF260	CILP2	PLCH1
CREB3L1	SIGLEC8	HOMER3
EXOSC4	LMAN2L	RPP21
PTTG1	SCG2	TFR2
SMC4	RALGPS1	QPCTL
USP11	ZIC1	RAB11FIP4
ZDHHC13	VRK1	EIF6
PAK1	UBL4A	LSM4
FOXO6	FAM203A	ZNF581
GINS1	C5orf54	ENDOV
AURKA	FAM117B	EFHC2
C6orf52	GTPBP3	ATP5G1
ERBB2	CLEC18C	EPS8L1
FAM211B	FKBP4	AGR3
ERBB3	HSH2D	TRAM1L1
POLA2	MMP9	C3orf80
TMEM121	SULT4A1	TCF19
BBOX1	ALPPL2	CD47
RUVBL2	ASRGL1	WISP3
PCDHA7	B3GAT3	REEP4
ZNF280B	OLA1	PPDPF
MREG	UBTF	KIF3C
C1QL4	MYT1	KCNK15
SMARCD2	PACSIN3	RPSA
VGLL1	FAM227A	RAB3IP
INPP5J	TMEM186	TMC6
ZNF750	MMACHC	MMP14
PTPRN	TSTD1	MYBL2
MFSD10	NSMCE2	NRCAM
NLRP7	COMTD1	CDC45
STRBP	ARHGEF39	NDC80
ACBD6	EYA2	LMAN2
SIX4	PSD	BABAM1
PACSIN3	DEPDC1B	PRSS50
PLOD1	CASKIN1	RAE1
IGF2BP3	SND1	CCNB2
SHROOM3	TMEM221	EPS8L2
TCEB2	TMEM183A	CAMK2N2
ENTPD2	NMI	UBE2C
PSAT1	FAM183A	CTSB
CSK	ATP1A3	TMUB1
ZBTB9	CAPN5	C20orf112
PRSS16	TMC6	GSTA1
PCNXL3	PHOX2A	NDUFB9
TSPAN33	LCN2	ABCC3
DUSP9	KIF14	C1orf145
CACNB1	SAYSD1	AURKB
SSR4	CNPY2	PARS2
DCAF7	KDM3A	SLC25A39
MANEAL	CHRNA1	IQCG
UBE2T	RPL18A	FAM211A
RAB34	CLN3	FAAH2
BOLA2B	TRPM2	NRG3
ABHD16A	PPP1R35	RCN2
SIRT7	DCAF12L1	CUEDC1
FAM195B	GAL3ST4	ANKRD45
NEK2	CLGN	NARS2
POLD1	ANKRD65	SOHLH2
NAB2	POLR2H	GALE
CARD11	FAM19A5	BRMS1
TMPRSS6	KCTD1	PROM1
LIMK2	FNDC1	NRM
LPAR2	MPPED2	TPI1
SORL1	GRK6	PDE6G
TACC3	FIGNL1	HUNK
ATP6V0B	RABL5	ZNF205
TRPM2	POLR3K	ANO9
LGALS3BP	PLXNB2	ORC1
MAPK8IP1	C3orf80	ZNF300
TSPAN1	FZD3	SKA3
MACC1	AGBL5	ACTL6A
PLCH1	C2CD3	GINS4
HOMER3	CYP4F11	ZNF726
RPP21	SIRT7	AP5S1
PCSK1N	KCNK2	ZNF408
TFR2	RECQL5	TMEM186
QPCTL	SLC25A39	C17orf104
RAB11FIP4	C20orf112	THOC3
EIF6	CACNA1E	RGS19
LSM4	DAGLB	CDCA3
ZNF581	RBM4B	PASK
ENDOV	R3HCC1L	BUB1B
EFHC2	EFNA2	TMEM205
ATP5G1	USP43	NUF2
EPS8L1	NME1-NME2	RARG
AGR3	CHD4	EME1
TRAM1L1	SOHLH2	FOXS1
C3orf80	CENPW	STX19
TCF19	CHI3L1	BAX
CD47	CYP26A1	C14orf79
GSTO1	EEF1G	RECQL5
WISP3	EVPL	CCDC28B
REEP4	TATDN1	APOA1BP
PPDPF	CXCL17	JTB
KIF3C	PODXL2	LRFN4
KCNK15	HIST1H2BK	PSMB10
RPSA	GABRP	NR2C2AP
RAB3IP	LOXL4	TTC5
TMC6	RPSA	PSD
STX1A	TGIF2	GTF3C2
NEU1	TIGD7	ZNF296
MMP14	ESM1	ANP32A
MYBL2	PAK4	APOA1
NRCAM	P2RY2	C9orf152
CDC45	PKN1	NUAK2
NDC80	SV2A	WDR62
LMAN2	FAM169A	ZKSCAN4
BABAM1	FUOM	TOR2A
PRSS50	MRPL11	NDUFB11
RAE1	DYRK4	INPPL1
CCNB2	SLC45A4	SH3BP1
EPS8L2	PSME2	TMEM30B
CAMK2N2	CDH2	PTPN6
UBE2C	LSM14B	WBP2NL
CTSB	KIAA1199	VWA2
TMUB1	SLC6A9	DDX49
C20orf112	EYA3	PWWP2B
GSTA1	RPL35A	EYA2
NDUFB9	RFC5	NFKBIL1
ABCC3	TMEM130	PBX2
C1orf145	CNOT10	CHEK2
ATP2B2	FAM83A	ZNF786
AURKB	IFIT2	SLC2A1
PARS2	ST8SIA2	DPF3
SLC25A39	PPP1R37	KLHDC7B
IQCG	ESRP2	FAM60A
TGIF2.C20orf24	ARFGAP1	SLC17A9
FAM211A	APEH	ZNF439
FAAH2	CXCL10	DVL3
COL5A2	PSTK	DCAF12L1
NRG3	MOV10	ZNF74
RCN2	SPRN	EXOSC5
CUEDC1	ZNF341	C1orf192
ANKRD45	PIP5KL1	FAM192A
NARS2	PPP1R14B	ITPR3
SOHLH2	TRMT12	FOXM1
GALE	CSTF2	BCL2L12
BRMS1	GRAMD2	AKAP8L
CNN2	IQCG	LINGO1
PROM1	PRR3	NGFRAP1
NRM	TIFAB	COIL
TPI1	ARMCX2	CDCA8
PDE6G	GPR156	RTKN2
HUNK	TSTA3	EXTL1
C8orf82	FAM71E1	ADCK2
ZNF205	BBC3	C17orf62
ANO9	C14orf142	TPX2
BRE	CNPY3	GREB1
ORC1	USP5	CBS
ZNF300	PIK3R2	BRSK1
SKA3	PIP4K2C	RHEBL1
ACTL6A	ITGB7	C5orf34
GINS4	HAUS8	GET4
ZNF726	STK32C	ZFP64
AP5S1	CGREF1	IDH2
ASIC2	ZSWIM4	HIST1H2BJ
ZNF408	TTLL4	HYLS1
MAP1S	CAMK2N2	MUC20
COL16A1	EFHC2	SCG5
TMEM186	TIMELESS	MRPL12
C17orf104	PBX2	ERCC6L
MPZL2	MIEF2	RELL2
THOC3	CENPE	CACNB3
RGS19	CSE1L	C17orf49
ZNF414	KRT81	NREP
CDCA3	STYXL1	CCDC157
PASK	PPP1R16A	DYRK1B
BUB1B	ENPP5	GPRIN1
SFRP4	GABRQ	VGLL4
KCNS3	ABCA13	PLXNB2
TMEM205	APOBEC3G	GTF3C5
NUF2	PUSL1	CORO2A
RARG	CDK5	PLK4
TMEM158	MSI1	NUP210
EME1	RPN1	DNAAF3
FOXS1	POTEI	FOXA2
STX19	ZC3H8	CHRNA5
BAX	KIF24	CBX1
C14orf79	RPS3A	B3GNTL1
RECQL5	DCLRE1A	ALG1
CCDC28B	HLA-DOB	CLGN
P4HA1	ERVMER34-1	APEX1
APOA1BP	C11orf45	ZNF444
JTB	JTB	TPD52
LRFN4	CXCL11	SDR42E1
PSMB10	DCAF15	KIFC2
NR2C2AP	BRD8	COA4
TTC5	SURF2	C16orf13
PSD	AGTRAP	GGT1
GTF3C2	TMPRSS3	APEH
ZNF296	NRM	C11orf45
STXBP5L	PLD4	ANKZF1
ANP32A	ITGBL1	C19orf57
APOA1	DMRT1	CDC25C
C9orf152	ANKLE1	ZNF185
NUAK2	MNS1	NSUN5
WDR62	FN1	NUP85
ZKSCAN4	ESYT3	GEMIN6
TOR2A	RPN2	MUTYH
NDUFB11	ACBD6	TLCD1
INPPL1	KDM2B	CKLF
PDE9A	ZNF497	TTK
ERI3	DYX1C1	SLC38A5
ST6GALNAC4	C9orf116	IL21R
SH3BP1	TP53BP1	UNC93B1
C12orf68	TADA1	IGLL5
TMEM30B	PNCK	GPN1
PTPN6	ZBTB9	SLC22A18
FHL2	NAB2	FAM227B
WBP2NL	MMP1	TREM2
VWA2	ZNF732	COMTD1
DDX49	ZBED6CL	C1orf86
PWWP2B	TREX1	RPS6KA1
SUPT3H	ZNF579	CCDC77
EYA2	S100A2	DPH7
NFKBIL1	HM13	SMO
GLS2	FABP6	NOSIP
PBX2	MIF	NCAPG
GPAA1	LEMD2	KIF4A
CHEK2	TRIM17	LIMD2
ZNF786	TRPV6	TRPV6
SLC2A1	TRIM29	ZNF793
DPF3	GET4	NOA1
KLHDC7B	NUP85	HAUS8
DLX5	FAM69B	ZBTB48
FAM60A	PPFIA4	POU5F1
SLC17A9	CEP70	PRKCQ
ZNF439	HOXD4	ZFP82
DVL3	UNC93B1	WDR83
DCAF12L1	COPZ1	PRUNE
ZNF74	CNDP2	KDELR1
EXOSC5	CHGA	STXBP2
ACOT7	GLB1	LMAN2L
C1orf192	FOXA2	CCDC22
FAM192A	LSM11	DNAH2
ITPR3	THAP8	CCNJL
FOXM1	C1orf145	DTYMK
BCL2L12	ASPM	NSMCE2
AKAP8L	ENHO	AGBL2
LINGO1	MEN1	ZMYND15
NGFRAP1	COL23A1	FBXO21
COIL	NPW	MRPS34
CDCA8	MTERF	CCNB1IP1
RNF144B	OCLN	MRPL13
DPEP3	TRIM65	RPS6KB2
RTKN2	CCDC134	RAB17
EXTL1	SALL2	SNRPD2
ADCK2	AGBL2	FBN2
C17orf62	ZNF530	BUB1
TPX2	TOMM34	TGIF2
TNNT2	SPICE1	C20orf196
GREB1	ZDHHC12	MRPL52
CBS	TMUB1	MAP6D1
BRSK1	SHROOM3	SNAPC4
RHEBL1	BST2	RALGPS1
C5orf34	KCNIP4	HIST2H4B
GET4	SLC15A2	WDYHV1
ZFP64	SPA17	MCRS1
IDH2	SLC52A2	HS3ST3A1
HIST1H2BJ	CADM1	CSMD2
IGSF21	FBXO32	ASRGL1
HYLS1	BGN	WRAP53
ADAMTSL2	FAM83D	C1orf35
MUC20	HARS2	MMS19
SCG5	SLCO1A2	CSE1L
MRPL12	CRTAC1	RPLP1
YIF1A	FAM227B	ISG15
ERCC6L	SUMF2	PLK1
RELL2	ZNF556	HKR1
AFMID	TBC1D7	CCNE1
CACNB3	AP2M1	POLE2
C17orf49	ZNF444	C6orf136
RPL10A	MED25	SQLE
NREP	SAMD12	NRSN2
COL2A1	PAX2	ZNF497
CCDC157	FAM83H	GPX8
DYRK1B	RUNX2	ZNF251
GPRIN1	FANCG	TTLL4
VGLL4	ASPHD2	ZNF322
MFGE8	IL20RA	NCAPH
PLXNB2	LMAN2	MRPS26
GTF3C5	OTUB1	STYXL1
CORO2A	DEFB1	FDXR
PLK4	ZNF43	PABPC1L
SIGLEC10	ZNF90	PIK3R2
NUP210	CRNKL1	C9orf37
DNAAF3	CKAP2	CENPO
FOXA2	KCNS1	CNGB3
CHRNA5	INTS8	CEP164
CBX1	BMF	C1orf85
B3GNTL1	ATP6AP1	MEN1
ALG1	RABEP2	NIF3L1
CLGN	TMEM147	OSBPL10
APEX1	NDUFB9	AJUBA
ZNF444	HMBS	NME1
TPD52	NFXL1	PGAP2
SDR42E1	SFXN1	RALY
KIFC2	TOR2A	RNF181
COA4	CHPF	CHEK1
TNS4	C2orf27A	SNX32
C16orf13	STRA13	DPF2
GGT1	TRIM26	CCDC113
APEH	SLC9A4	VARS
EVA1B	RFC3	VANGL1
TP53	DSN1	HJURP
C11orf45	MAN1B1	CRABP2
ANKZF1	ZNF205	DCAF11
ESRRG	SLC38A1	MICALL2
SUMO3	STX19	CABYR
C19orf57	ZNF408	CHAF1B
CDC25C	C11orf83	SUMF2
TPRA1	BRIP1	B9D2
IFT122	FAAH2	SCAMP5
ZNF185	MACC1	MIF
NSUN5	ZNF496	C2CD3
LTBP2	FERMT1	TNNT1
NUP85	B3GALNT1	FKBP4
GEMIN6	APEX1	FAM102A
DNAJB11	EHD3	TMEM251
MUTYH	HEY2	ISYNA1
TLCD1	TMPRSS2	PIWIL1
CKLF	MYCN	ZNF821
TTK	CRIP3	PANX2
SLC38A5	PKIB	ABRACL
IL21R	MRPL12	SH3D21
UNC93B1	BOLA2B	FUT8
IGLL5	ATIC	ABCA13
GPN1	SCAND3	NUP62
SLC22A18	DRD4	NMU
FAM227B	ZNF738	BORA
TREM2	ANKRD45	SRPK1
COMTD1	RNF26	SMUG1
C1orf86	C12orf76	XPR1
RPS6KA1	ZRANB3	ADAM8
CCDC77	CMTM6	SLC7A11
DPH7	C16orf93	CYP2S1
SMO	CAMK1G	NARFL
NOSIP	C14orf79	CEP85
NCAPG	CD80	KAT7
KIF4A	AKAP3	PCNA
LIMD2	HRK	RAD9A
TRPV6	CEP41	E2F7
FLYWCH2	SCRIB	GLB1
ZNF793	MTG1	MTBP
NOA1	SOX4	PTGES2
HAUS8	BLOC1S3	SLC29A3
ZBTB48	EBP	MAP7D2
POU5F1	RCN2	RCC1
PRKCQ	TNIK	DYRK4
ZFP82	FBN2	MRPL21
WDR83	NR2C2AP	ASNA1
PRUNE	RANGAP1	CAMK1G
RAI1	C6orf1	COL6A5
KDELR1	ZNF821	SLC6A9
STXBP2	NKD2	GNPDA1
LMAN2L	ZNF2	TBX19
CCDC22	TNNC1	SDF2L1
DNAH2	KIAA1524	ZNHIT2
CCNJL	TSEN54	PCDHGA10
CWC15	POLB	ZNF556
DTYMK	ZNF461	HSH2D
NSMCE2	PSMA5	RANGAP1
ZBTB8B	SIX4	DNASE2
VWA1	SMARCB1	PPP2R1A
AGBL2	H2AFY	KCTD1
ZMYND15	EMC9	TOR4A
S100A1	RAB34	GPR37L1
FBXO21	CIITA	GPRIN2
MRPS34	SRPK1	NUSAP1
CCNB1IP1	RUFY4	CENPA
MRPL13	RPL12	ADAMDEC1
RHOD	DCBLD1	LAMP3
RPS6KB2	GTF3C5	HN1L
RAB17	ST6GALNAC1	ALKBH4
AAGAB	DCHS2	DYX1C1
SNRPD2	RAD9A	MUC15
FBN2	BOLA2	RFWD3
BUB1	C9orf37	THADA
TGIF2	ZMYM3	MYCN
C20orf196	RAE1	PIH1D1
MRPL52	DCP1B	SGOL1
MAP6D1	RELL2	MYB
SNAPC4	GPR114	VPS72
RPL22L1	CLIC6	FAT2
RALGPS1	RAB3IP	SLFN13
HIST2H4B	ZNF322	ALPPL2
WDYHV1	SLC6A13	RPS19
MCRS1	AP4M1	BLOC1S3
HS3ST3A1	APOC1	CLDN22
CSMD2	TNNI1	SMARCB1
ASRGL1	LYSMD1	PNPO
WRAP53	SHKBP1	SND1
C1orf35	C17orf62	RBM10
MMS19	FAM58A	PCYOX1L
CSE1L	C11orf48	ZNF525
LEPRE1	C17orf104	DDX39A
RPLP1	GPX8	EXO5
ISG15	SUGP1	GPR141
ARF3	PPM1H	DCLRE1B
PLK1	HIST1H4J	PCYT1B
IFITM1	C1orf85	PNKP
SSNA1	RALY	DNMT3B
HKR1	PRC1	WDHD1
CCNE1	ACP6	PIF1
POLE2	SPATC1L	HDGF
LIPC	PDIA6	CXCL17
IFT46	ZNF254	BIRC5
C6orf136	SMG7	RPL27A
SQLE	UBQLN4	CTPS2
NRSN2	MLST8	CEP55
ZNF497	TRAPPC6A	KIAA0391
LRRC14	MRPL13	THAP8
CCDC104	HIST1H2AG	BLM
GPX8	C17orf70	RNF113A
ZNF251	TRIT1	PCGF1
TTLL4	PSMB10	HIST2H4A
ZNF322	INPP5J	REXO4
NCAPH	GIPC1	SETDB1
MRPS26	ZNF879	DOLPP1
STYXL1	SPATA33	DMBX1
FDXR	RAB3B	ZNF687
TANC2	PNKP	ZNF625
EEF1D	USP39	SPDL1
ADC	MRPS26	ZNF564
PABPC1L	ATP13A1	POLR2I
PRR5.ARHGAP8	C9orf142	DLGAP5
PIK3R2	LY6E	MIEF2
NWD1	CENPU	NCAPD2
C9orf37	ZSWIM1	KIF23
C6orf48	SHANK1	VTCN1
CENPO	ORC6	TTC9C
ALDH1B1	SULT1C2	DEDD2
MARVELD1	ZFP92	UBE2O
USH1G	HDGF	EXO1
WDR53	CDR2L	ABHD8
TMEM216	RAI14	MGAT4B
CNGB3	ITFG2	AGMAT
CEP164	NRCAM	LIMS3
C1orf85	EPPK1	NSUN7
DDX25	ATP13A2	SLC9A2
ARL3	PIWIL1	KIF18A
MEN1	MED22	ESYT3
NIF3L1	CCDC120	KIAA0907
OSBPL10	ASUN	KCNK2
AJUBA	SEMA7A	CD1E
NME1	MAP7	RPL35
PGAP2	NUP62CL	CCDC151
RALY	PPP1R26	SOWAHD
NEURL1	ATP5G1	LSM7
APRT	CD1E	MMP9
SIGIRR	TRPV4	PSME2
RNF181	IL9R	MAD1L1
CHEK1	VARS	SHKBP1
SNX32	SNAPC4	TMEM223
DPF2	RPL8	MARK2
PAAF1	DPF2	EEFSEC
CCDC113	ELL3	KDM3A
QPCT	NUAK2	CHCHD6
VARS	MANF	COL1A1
VANGL1	HEXIM2	WDR24
HJURP	GPRIN1	RBM42
AGAP3	PITPNM1	LIN28B
CRABP2	EXO5	TMEM169
IL10RB	ROGDI	BNIPL
DCAF11	C6orf52	ZNF682
MICALL2	PBK	CXCL11
SNRPD3	DPM2	HDAC1
CABYR	HDAC3	PPIE
CHAF1B	KLK13	PRR15L
SUMF2	MAP4K1	EMC9
B9D2	COL6A5	MED22
SCAMP5	SLC4A11	IGF2BP1
MIF	GGT1	PAQR7
MED12L	BARX2	ANKRD2
C19orf53	ZSCAN31	CAD
C2CD3	HS3ST3A1	ZNF440
TNNT1	KLK8	ENTPD6
FKBP4	PROM1	PAK4
FAM102A	LIMD2	NAT9
TMEM251	ADCK2	SLC6A15
ISYNA1	TSPAN1	C8orf76
DCTN5	DDR1	HEATR6
PIWIL1	GALM	RYR1
ZNF821	DHRS13	VPS33B
PANX2	DNTTIP1	ZDHHC16
ABRACL	MED18	SALL2
CDK2AP2	WNT6	MAL2
SH3D21	TTC5	RPL39
FUT8	ENTPD2	GPR89B
C11orf84	ANAPC15	ZNF599
ABCA13	EFTUD1	PARPBP
NUP62	ZNF425	ABHD12
C20orf195	MCM6	RNF182
NMU	KRT7	SPC24
BORA	ZNF667	ZFP69B
SRPK1	USP51	FEN1
SMUG1	OBP2A	ALCAM
XPR1	FSCN1	ZNF766
ADAM8	KIAA1522	SNRPA1
SLC7A11	TNFRSF18	SUGP1
CST2	ATAD2	MCM7
CYP2S1	ZNF33A	SLC22A18AS
SFRP2	EEFSEC	ZNF709
TMSB10	NOSIP	MRPL51
NARFL	CHTOP	MED25
HLA.DOA	ITPR3	CSTF2
CEP85	ZNF232	PDCD2L
NTF3	LOH12CR1	NR6A1
KAT7	SMO	ZNF623
MROH2A	NARFL	TMEM41A
PCNA	RPS6KB2	MELK
RAD9A	SARS2	OIP5
E2F7	ABHD12	MIS18A
GLB1	POU5F1	XKR7
MTBP	SIAH3	USP5
PTGES2	PIANP	SF3B3
SLC29A3	POTEF	THNSL1
FAM20A	NEK6	KIF15
MAP7D2	ZNF485	KIAA0101
RCC1	TCOF1	KIF11
RAC3	ZFYVE19	DTL
DYRK4	CCDC28B	APITD1
MRPL21	TNNT1	LIME1
ASNA1	FUK	TRIM45
CAMK1G	MUC20	RGS14
IRAK1	DDX49	STK33
KATNB1	NKAIN1	DLEU7
COL6A5	IGLL5	SIAH3
CRMP1	CCDC150	SIGLEC8
SLC6A9	VWA2	ANKRD39
GNPDA1	ZNF775	BCDIN3D
TBX19	SLC39A7	CYB5R2
SDF2L1	FBXL16	ZNF282
GRIK3	C6orf15	YEATS2
ZNHIT2	IGF2BP2	EZH2
PCDHGA10	CES3	CENPF
ZNF556	TTC30A	SFXN2
HSH2D	SMARCA4	RBM4B
RANGAP1	CTSB	PRRX2
IMPDH2	GORAB	C12orf76
DNASE2	GPS1	MRPL11
PPP2R1A	UBE2Z	TRIM65
KCTD1	CBR1	TMEM200C
TOR4A	SLC39A10	RRM2
GPR37L1	EPRS	OCLN
GPRIN2	MRPL51	STX18
NUSAP1	GTF3C2	RFC3
CENPA	RAB15	NHP2
SCARF2	TRIM27	SMARCC1
ADAMDEC1	ZBTB26	ADORA1
LAMP3	GPANK1	SRC
CERS1	MAD1L1	C2orf27A
RCN3	LGALS9	AMY1C
HN1L	LIMK2	RUFY4
KRT6B	XK	KDM4A
ALKBH4	PTPN7	ZNF526
DYX1C1	ZNF251	WDR5B
MUC15	OXSM	OGDHL
ZHX1.C8ORF76	GPATCH1	KLK13
CLEC11A	WDR96	MROH7
RFWD3	CHCHD1	CASC5
THADA	HKR1	CASP6
P4HA3	BEX2	E2F8
MYCN	ABHD8	POLM
PIH1D1	MRPS34	ATP13A2
SGOL1	PGAP2	RAB26
MYB	RPL13A	ZRANB3
VPS72	PCYT1B	AMOT
FAT2	GMIP	RAD51AP1
SLFN13	MMS19	NACC1
2012-09-07	CASC1	C11orf83
ALPPL2	PFKFB4	GRAMD3
RPS19	MAP7D2	ZNF816
BLOC1S3	VPS72	EYA3
NOG	GOLPH3L	SHCBP1
ATP8A2	ZNF112	PIP4K2C
CLDN22	SMARCD3	DHDH
SMARCB1	ZNF346	HENMT1
PNPO	HESX1	FAM24B
SND1	FOXO6	CASC1
RBM10	PARG	NPRL2
PCYOX1L	STK33	PTOV1
ZNF525	LIPT2	METTL13
DDX39A	REPIN1	GPANK1
C11orf24	GNB1L	ADPRHL2
EXO5	SCG5	LOH12CR1
GPR141	TMED9	CHDH
SEMA5B	SMARCAL1	PHB
SMPD2	PLCD3	TRAPPC6A
DCLRE1B	PSME1	ZC2HC1C
FCGBP	RCAN3	EIF3H
PCYT1B	TRPM5	SIPA1L3
PNKP	CT45A5	ERP29
DNMT3B	SMARCC1	STYK1
WDHD1	DERL3	SAMD15
PIF1	B9D2	FAM134A
FGF18	MPZL3	LRRC27
HDGF	NDC1	ZNF428
CPNE1	TMEM106C	CKS2
FAM69C	RHCE	KIF20A
CLHC1	LIN28B	B3GALNT1
CXCL17	C6orf136	KIAA1522
BIRC5	GJB2	DENND6B
RPL27A	CABYR	CLUL1
CTPS2	ERCC2	TTI1
CEP55	NRTN	ZNF33B
TPM4	DEGS2	TRPM5
KIAA0391	CCDC22	C12orf73
THAP8	ZNF284	CCNA2
BLM	THADA	LYSMD1
RNF113A	PARP4	TIMM17B
PCGF1	SAMD15	RPS7
PPIL3	PYCRL	SKA1
MTFP1	ADCK5	ZNF85
HIST2H4A	ZNF182	MMACHC
GCK	DGUOK	SMARCA4
PCGF2	XPO1	CLCN2
REXO4	RFC2	CDCA2
COL5A1	DCTPP1	GOLGA7B
SETDB1	ABCB9	XRCC2
DOLPP1	IFI6	MKI67
DMBX1	MAP6D1	RSG1
OGFOD3	B3GNTL1	CD80
ZNF687	TMEM132A	GSG2
TMEM161A	DBF4B	MRPL3
ZNF625	NSUN7	CHD4
SPDL1	ADAM8	IL23A
ZNF564	TNFRSF19	ZNF768
CD207	C9orf117	BARX2
POLR2I	PRKCSH	SOX4
DLGAP5	SPOCK3	PRPF40B
MIEF2	BLNK	CPLX2
NCAPD2	DENND2D	PLA2G15
KIF23	ATAT1	RAD54B
ISLR	WDR76	CC2D1A
VTCN1	ZNF594	TTLL12
TTC9C	IFIT1	NUDT14
DEDD2	LIMS3L	PANK1
TEN1	YAE1D1	ZNF552
UBE2O	CACYBP	FAM220A
EXO1	FBL	OGFOD2
ABHD8	ZIK1	ZNF606
S100A16	IL23A	PPP1R26
PRDX4	CHPF2	FOXRED2
MGAT4B	PRAF2	TRAP1
AGMAT	CENPBD1	TRIM32
LIMS3	VWA7	RUSC1
NSUN7	NRSN2	KCNK1
SLC9A2	LAGE3	CCDC120
KIF18A	WBP2NL	GALM
PPP4C	AJUBA	OSBPL3
ESYT3	CACNB1	CXCR4
KIAA0907	ZNF599	UBD
KCNK2	SLC16A9	HSD11B2
CD1E	ADAMTS14	ZNF610
YIPF3	SYMPK	GABRP
UXT	RPP21	ARL16
SHANK2	DLEU7	ARHGEF39
RPL35	ZSCAN9	CHTOP
NUTF2	RBBP4	TUBGCP2
CNIH2	FOXRED2	ETV1
SS18L1	KNSTRN	PRDX1
CCDC151	RBM12B	UBQLN4
SOWAHD	METTL12	HAUS5
LSM7	NPAS2	FAM154B
MMP9	KRT14	ZNF667
IGLL1	RBM10	TNNI1
PSME2	HYOU1	BRCC3
MAD1L1	DIAPH1	SPICE1
SHKBP1	MAGED4B	ZSCAN12
TMEM223	ZNF836	CNDP2
MARK2	XDH	VPS8
EEFSEC	RNF187	IRF3
FKBP1B	CCDC113	C11orf48
KDM3A	SPAG5	DEPDC1
CHCHD6	EPS8L1	GORASP2
COL1A1	FBXO34	CMTM1
RIPK4	TIAM2	CX3CR1
WDR24	GORASP2	ST6GAL2
RBM42	CCNJL	ZNF775
LIN28B	VCAN	ADSL
TMEM169	PSENEN	AIM2
BNIPL	WDR24	IRX3
ZNF682	TCEA3	ELL3
MRPL14	FAM171A1	GPR110
FBXO2	TCTEX1D2	TP53BP1
CXCL11	ZNF623	PSME1
HDAC1	DPH7	ZMYM3
PIGQ	ZNHIT2	POP7
PPIE	TRMU	LRRC8E
PRR15L	PNPO	FANCI
EMC9	MROH7	IQGAP3
KERA	TM6SF2	SLC39A10
RPS24	FAM195A	PPP2R2B
MED22	ZNF428	SAMD12
IGF2BP1	AIFM1	PTRHD1
RPS10.NUDT3	RCCD1	MFSD12
CEL	CEP164	TYMS
BCAT1	ADPRHL2	THSD4
PAQR7	SMUG1	CEP41
WDR46	MC1R	UNK
ANXA13	PRMT6	FBXO46
ANKRD2	MICALL2	ZNF683
CAD	BABAM1	KCNQ5
FOXF2	EPHA10	ZFP62
ZNF440	MRPL21	GBA
ENTPD6	KAT7	NELFCD
PAK4	ZNF239	C17orf80
NAT9	PABPC1L	NRIP3
TLE6	RUSC1	RGS9
SLC6A15	FAM84B	EIF2AK1
NELFE	COPE	SLC38A7
C9orf43	LGR5	CALN1
C8orf76	ZDHHC16	ZNF724P
VWA9	PTOV1	GPR114
HEATR6	REXO4	DFFB
RYR1	HSD11B2	ARMCX2
VPS33B	MMP14	OSGEP
[truncated: 5,388 more rows]

## Sheet: Table S21
Supplementary Table 21: Overlap of PLS identified molecules from models of genes/proteins vs tissue modulus and genes/proteins vs disease score
set1. PLS ECM genes vs Tissue modulus 15 - 20 % top 405 genes (loading weight > |0.030|)
set2. PLS ECM Proteins vs Tissue modulus 15 - 20 % top 64 proteins (loading weight >|0.08|)
set3. PLS ECM genes vs disease scores (loading weight >|0.03|)
set4. PLS ECM Proteins vs disease scores (loading weight >|0.08|)
red = positive association, blue = negative association
set.1	set.2	set.3	set.4	common.in.sets1234
MMP11	COMP	ST14	PLOD1	COL11A1
CLEC18B	PLOD1	MDK	S100A11	COMP
COL10A1	THBS1	MMP7	SFRP4	FN1
COL11A1	FBLN1	HAPLN1	ANXA4	VCAN
COMP	LMAN1	COL10A1	MXRA5	CTSB
HAPLN1	SPON1	ADAM28	SERPINH1	COL1A1
INHBA	SERPINH1	COL11A1	SPON1	AGT
MMP13	SFRP4	MMP11	HPX	ANXA6
SDC1	FN1	SDC1	VCAN	ANXA5
ST14	VCAN	COL22A1	HCFC1	LGALS3
SERPINB5	S100A11	VWDE	COL11A1	LAMB1
COL22A1	S100A1	SERPINB5	PLOD3	FBLN2
PODNL1	HCFC1	S100A14	LGALS3	LAMC1
MFAP2	ANXA4	PODNL1	CTSB	HSPG2
CST1	COL11A1	CTSV	S100A1	CTSG
CLEC18A	PCOLCE	F12	CSTB	COL15A1
EPYC	SFRP2	RSPO4	PLG	ANXA1
MMP7	MXRA5	MFAP2	COL8A1	LAMA4
LOXL4	ANXA6	CLEC18B	FN1	VWF
CLEC5A	AEBP1	LTA	FBLN2	COL6A6
LOXL1	ANXA5	CTHRC1	SFRP2	ABI3BP
WNT7A	EFEMP2	MMP13	FBLN1	TNXB
MDK	HPX	COL9A2	PCOLCE
CLEC18C	CSTB	WNT7A	ANXA5
PRSS1	LGALS3	EPYC	COMP
WNT6	FBLN2	MUC1	LMAN1
LAMB3	COL8A1	WNT10A	ANXA6
EMID1	THBS4	COL13A1	LTBP2
FN1	PLOD3	FBN3	AEBP1
RSPO4	CILP	IGFBP2	LGALS1
CTSV	LTBP2	COMP	THBS1
WNT10A	SERPINA1	LAMB3	CTSD
S100A14	LGALS1	HAPLN4	ANXA7
CTHRC1	ANXA1	PRSS1	AGT
S100A2	CTSB	CLEC5A	SERPINA3
MUC5B	PLG	CST1	GPC6
BGN	GPC6	ADAMDEC1	S100A4
COL8A2	AGT	LTB	COL5A1
SPOCK3	S100A6	INHBA	SERPINA1
COL9A2	ANXA7	SPOCK2	HRG
FBN3	COL6A2	SPP1	S100A6
MMP1	LAMB1	EMID1	F2
PRSS3	COL1A1	IMPG2	TNC
SPOCK2	NID2	MUC15	ANXA1
IGFBP2	ASPN	MUC5B	EFEMP2
MUC1	CTSG	LOXL1	COL6A3
LAMC2	NID1	COL8A2	S100A8
SEMA7A	COL15A1	WISP3	VWF
TLL2	LAMA5	LAMC2	LAMA4
SERPINA5	HSPG2	PRSS3	COL6A6
WNT7B	LAMA4	C1QTNF6	LAMA5
MATN3	COL6A6	GDF1	COL15A1
C1QTNF6	EMILIN2	CILP2	LAMB1
COL13A1	S100A8	CLEC18A	COL1A1
CILP2	VWF	MMP9	HSPG2
TNFSF4	COL6A3	CLEC18C	CTSG
THBS2	FBN2	FNDC1	TNXB
GDNF	FBN1	PLXNB2	COL4A2
F12	MMRN2	LOXL4	ABI3BP
FNDC1	OGN	CXCL10	LAMC1
VCAN	COL4A2	ESM1
SFRP5	TNXB	CXCL11
AEBP1	ABI3BP	MMP1
VWDE	LAMC1	FN1
ADAM28		S100A2
HAPLN4		BGN
LTA		COL23A1
MMP3		FBN2
PLOD1		SEMA7A
SPP1		WNT6
C1QL4		CTSB
GPC2		COL6A5
COL23A1		MUC20
COL7A1		VWA2
CTSB		LGALS9
ADAMTS14		ADAM8
WISP3		SPOCK3
ELFN2		NRTN
PLXNB2		IL23A
S100A1		ADAMTS14
WISP1		VWA7
MUC20		VCAN
VWA1		MMP14
MMP14		NTN5
ISM1		TLL2
TGFA		THSD4
P4HA1		OGFOD2
NRG3		EGLN3
VWA2		ELFN2
LEPRE1		GPC2
ADAMTSL2		GDNF
COL5A2		WNT7B
S100A16		SEMA4B
COL16A1		AGRN
VWA9		TNFSF4
ADAM8		NRG3
FGF18		C1QL4
MUC15		COL1A1
NTF3		FST
SERPINH1		ADAM15
SEMA5B		PLXDC1
FAM20A		NELL1
MFGE8		S100A9
LTBP2		ADAM22
IL23A		IL24
P4HA3		ISM2
SFRP4		SERPINF1
COL2A1		EDA
MMP9		SEMA5A
COL5A1		MFAP5
ADAMDEC1		SPOCK1
CHAD		POMZP3
FBN2		THPO
CLEC11A		PZP
COL6A5		LAMB4
MEGF10		ITIH4
COL1A1		ANXA7
CXCL11		S100P
ESM1		NDNF
ANXA13		WNT5A
CST2		NELL2
OGFOD2		ADAMTSL5
EGLN3		HMCN2
CCL11		CLEC4D
SFRP2		SERPINB10
THSD4		CHADL
ZP3		CLEC4E
LTB		GPC6
GDF1		IL10
CXCL10		EGFL8
SERPINA1		IL7
THBS3		SMOC2
KERA		WFIKKN2
MMP10		C1QTNF9B
GDF11		CST3
CTSK		MST1
AGRN		COL4A6
CTSH		CRELD1
POSTN		PDGFD
S100A13		IGFBP4
SEMA4B		LGI2
HAPLN3		VEGFB
IMPG2		CSTA
COL1A2		SEMA6D
VWA3A		GDF7
ADAM12		MMP24
MUC16		OMD
CTSC		IGF1
NID2		ANXA8L1
SEMA6C		PDGFB
SERPINB8		WIF1
PLXNB3		TIMP2
MMP25		FSTL3
IGF1		IL17D
LGALS4		IGFBP7
DCN		FRAS1
MGP		FMOD
LAMB4		MATN4
SERPINB6		LGALS3
PLXNA2		THBS1
CBLN3		EMILIN2
F13A1		COL28A1
WNT9B		COL27A1
FCN3		SEMA3D
ADAMTS3		WNT10B
IL1A		PAPPA2
MMP17		SEMA3C
TNFSF12		TECTA
SEMA3D		CTSL
FCN1		SERPINB9
HMCN1		CLEC10A
CHRD		IL13
ANGPTL4		SERPINB6
WNT9A		CYR61
C1QTNF4		ADAMTSL1
S100A10		NID2
C1QTNF9B		COLEC12
SERPINB9		SERPINB8
LAMB2		MGP
FGF7		CLEC4M
ANXA8L1		WISP2
MST1		HMCN1
IL13		TCHH
CRLF3		TNFSF12
EGFL8		INHBB
PTN		S100A12
COL5A3		EPGN
HHIP		SERPING1
LGI2		CFC1
FRAS1		IL1A
WNT10B		WNT9A
CTSL		CX3CL1
CSF3		FCN1
CXCL1		ANXA3
ELFN1		ANGPT4
EGFL7		HPSE2
ADAMTSL1		SEMA6C
MMP19		ZFP91
GDF7		AREG
FGF1		DCN
COL4A1		PRELP
TNN		CTSO
AGT		ADAMTS3
COL4A6		NTNG1
CCL18		CBLN2
MFAP4		SERPINB2
ANGPT4		PAMR1
XCL2		GDF5
ITIH4		FBLN7
ANXA3		MEGF8
C1QTNF1		HYAL2
CCL2		ADAMTS4
NELL2		CSF1
CX3CL1		CNTF
ADAM23		FCN3
ADAM9		HAPLN2
FGF13		COL4A2
COL4A4		FGF1
SEMA3C		EGFL7
WIF1		CCL23
FBN1		PLXNB3
PAPPA2		ADAMTS18
VEGFA		MFAP4
CTSO		CXCL12
CXCL12		IGSF10
PCSK6		ADAMTS9
SDC2		FGF7
EREG		DHH
PLXNA4		MMP25
COL27A1		HHIP
ANXA6		COL21A1
SRGN		S100A8
SEMA6A		EREG
LEP		BRINP2
ANXA5		RSPO3
FSTL1		IGF2
CXCL3		PLXND1
MEGF9		MMP19
TLL1		WNT9B
IGFBP3		ELFN1
SFRP1		TLL1
IL6		TIMP3
PLOD2		F13A1
CLEC10A		MFAP3
ADAMTS15		SMOC1
SMOC1		MMP17
HMCN2		CCL2
COLEC11		MEGF9
HAPLN2		CXCL6
CFC1		CXCL1
GDF5		LEPREL1
CBLN2		LGALS2
BRINP2		HBEGF
CSF1		ANGPTL4
EMILIN2		CHRD
NTN3		S100A10
PODN		CXCL3
COL21A1		COL5A3
PLXND1		MATN2
DHH		ANXA5
CXCL6		FGF14
CLEC1A		LAMB2
S100B		EGLN1
F10		COL6A6
TSPEAR		BMP3
SEMA6B		PLXNA2
THBS4		FAM20B
FBLN7		CLEC4G
ADAMTS9		AGT
LGALS2		SRGN
EPGN		FBN1
CLEC4M		TSPEAR
FGL2		NRG2
PAMR1		PODN
BMP6		ITLN2
SNED1		SEMA6B
FCN2		PCSK6
LGALS3		COCH
EYS		PLOD2
MMP28		NGF
TCHH		FREM1
BMP3		CRHBP
BMP5		CSF3
MEGF8		ADAMTS15
CBLN1		CBLN1
LGALS12		TNFSF14
ELANE		SERPINE3
LAMB1		VEGFC
FBLN2		FGL2
FREM1		EYS
LAMC1		IGFBP5
CRHBP		NTN4
PCSK5		SPARCL1
NRG2		A2M
GLDN		F10
BMP2		SDC2
COCH		ADAM33
FGFBP2		VTN
ZFP91		ANXA1
HSPG2		HGF
IGFBP6		TNN
CTSG		COL4A1
NID1		FGF13
VEGFC		ABI3BP
CLEC4G		BMP5
MFAP3		SEMA6A
FAM20B		SCUBE1
FIGF		IGFBP3
PRG4		IGFBP6
NGF		CTSG
MATN2		ADAM23
TIMP4		SERPINI1
EGFLAM		BMP6
COL15A1		DPT
ADAMTSL3		GDF10
ADIPOQ		VEGFA
FBLN5		C1QTNF1
CSPG4		CD209
ITIH5		ANXA6
IL20		HCFC2
SPARCL1		ANGPT2
ITLN2		SNED1
SERPINE3		ELANE
COL25A1		CLEC1A
ANGPT2		MSTN
VTN		CCBE1
ADAM33		CCL13
ZP1		ZP1
GDF10		COL15A1
ANGPTL2		FSTL1
EGLN1		COLEC11
CXCL2		THBS4
PCOLCE2		PAPPA
SCUBE1		S100B
IL7		LAMC1
SVEP1		GLDN
LAMA2		COL25A1
CD209		ADAMTSL4
ANGPTL1		LGALS12
SERPINI1		CCL14
ANXA1		IL6
MUC3A		CCL21
ADAMTS1		ANGPTL2
CCBE1		SFRP1
TINAGL1		PLXNA4
IGSF10		KITLG
ECM2		LGALS8
TNFSF14		LGI4
GPC3		ANGPTL7
HGF		FBLN2
IGFBP5		LEP
ANGPTL5		MMP28
HPSE2		ANGPTL1
ITLN1		MUC3A
CLEC3B		PRG4
IGFBP1		FIGF
ADAMTSL4		FGFBP2
HYAL1		FCN2
LAMA4		WNT2B
A2M		OGN
CCL21		CLEC14A
EFEMP1		LTBP4
HCFC2		TINAGL1
SRPX		IL20
SEMA6D		ADAMTS5
TPO		PCSK5
PAPPA		ITLN1
SLIT3		ADAMTS1
ANGPT1		SLIT3
CCL14		IGFBP1
LGI4		MMRN1
MASP1		EGFLAM
VIT		EFEMP1
LGALS8		EMCN
VWF		RELN
DPT		ANGPTL5
COL6A6		TPO
ANXA8		FBLN5
OGN		HSPG2
C1QTNF9		ANGPT1
CCL13		NID1
CCL23		LAMB1
FGF10		HYAL1
FGF14		TNXB
ANGPTL7		BMP2
CLEC14A		CXCL2
MSTN		SRPX
ABI3BP		CLEC3B
ADAMTS5		ADIPOQ
MMRN1		BMPER
LTBP4		LAMA2
WNT2B		ITIH5
FGF2		CSPG4
CHRDL1		MMRN2
TNXB		TIMP4
KITLG		ANXA8
PARM1		ECM2
MMRN2		C1QTNF9
BMPER		PARM1
SEMA3G		ADAMTSL3
CRIM1		VIT
EMCN		PCOLCE2
RSPO3		FGF10
NTN4		FGF2
RELN		SVEP1
		GPC3
		CHRDL1
		LAMA4
		VWF
		MASP1
		CRIM1
		SEMA3G

## Sheet: Table S22
Supplemantary Table 22: ChEA-extracted transcription factor binding to matrix index genes
target.gene	transcription.factor.ChEA	PMID	experiment	cells	species
COL11A1	REST	18959480	ChIP-ChIP	MESC	Mouse
COL11A1	POU3F1	26484290	ChIP-Seq	ESC	Mouse
COL11A1	POU3F2	20337985	ChIP-ChIP	501MEL	Human
COL11A1	BACH1	22875853	ChIP-PCR	HELA AND SCP4	Human
COL11A1	SOX2	21211035	ChIP-Seq	LN229	Human
COL11A1	CTBP2	25329375	ChIP-Seq	LNCAP	Human
COL11A1	KLF4	25985364	ChIP-Seq	ATHEROSCLEROSIS LESION	Mouse
COL11A1	HOXD13	18407260	ChIP-ChIP	invivo in developing limbs	Mouse
COL11A1	STAT3	23295773	ChIP-Seq	U87	Human
COL11A1	WT1	20215353	ChIP-ChIP	NEPHRON PROGENITOR	Mouse
COL11A1	SMARCD1	25818293	ChIP-Seq	ESC	Mouse
COMP	REST	18959480	ChIP-ChIP	MESC	Mouse
COMP	RUNX2	24764292	ChIP-Seq	MC3T3	Mouse
COMP	PHC1	16625203	ChIP-ChIP	MESC	Mouse
COMP	BMI1	23680149	ChIP-Seq	NPCS	Mouse
COMP	MTF2	20144788	ChIP-Seq	MESC	Mouse
COMP	JARID2	20075857	ChIP-Seq	MESC	Mouse
COMP	TET1	21490601	ChIP-Seq	MESC	Mouse
COMP	EZH2	23942234	ChIP-Seq	MYOBLASTS AND MYOTUBES	Mouse
COMP	TCF3	18347094	ChIP-ChIP	MESC	Mouse
COMP	HSF1	23293686	ChIP-Seq	STHDH STRIATAL	Mouse
COMP	EED	16625203	ChIP-ChIP	MESC	Mouse
COMP	SUZ12	18692474	ChIP-Seq	MESC	Mouse
COMP	CREM	20920259	ChIP-Seq	GC1-SPG	Mouse
COMP	RNF2	16625203	ChIP-ChIP	MESC	Mouse
COMP	SOX9	25088423	ChIP-ChIP	EMBRYONIC GONADS	Mouse
COMP	TP63	22573176	ChIP-Seq	HFKS	Human
COMP	ELF1	20517297	ChIP-Seq	JURKAT	Human
COMP	SRY	25088423	ChIP-ChIP	EMBRYONIC GONADS	Mouse
COMP	RNF2	18974828	ChIP-Seq	MESC	Mouse
COMP	EWS-ERG	20517297	ChIP-Seq	CADO-ES1	Human
COMP	EZH2	18974828	ChIP-Seq	MESC	Mouse
COMP	SUZ12	16625203	ChIP-ChIP	MESC	Mouse
COMP	TEAD4	22529382	ChIP-Seq	TROPHECTODERM	Mouse
COMP	EGR1	20690147	ChIP-Seq	ERYTHROLEUKEMIA	Human
COMP	SUZ12	20075857	ChIP-Seq	MESC	Mouse
COMP	HNF4A	19822575	ChIP-Seq	HepG2	Human
COMP	FOXA2	19822575	ChIP-Seq	HepG2	Human
COMP	TCF3	18467660	ChIP-ChIP	MESC	Mouse
COMP	SIN3B	21632747	ChIP-Seq	MESC	Mouse
COMP	JUN	21703547	ChIP-Seq	K562	Human
COMP	SUZ12	18974828	ChIP-Seq	MESC	Mouse
FN1	CCND1	20090754	ChIP-ChIP	RETINA	Mouse
FN1	TCF21	26020271	ChIP-Seq	SMOOTH MUSCLE	Human
FN1	AR	25329375	ChIP-Seq	VCAP	Human
FN1	MYC	19030024	ChIP-ChIP	MESC	Mouse
FN1	RUNX2	24764292	ChIP-Seq	MC3T3	Mouse
FN1	NANOG	18692474	ChIP-Seq	MESC	Mouse
FN1	STAT3	1855785	ChIP-Seq	MESC	Mouse
FN1	SOX2	20726797	ChIP-Seq	SW620	Human
FN1	ZNF217	24962896	ChIP-Seq	MCF7	Human
FN1	PRDM14	21183938	ChIP-Seq	MESC	Mouse
FN1	EOMES	21245162	ChIP-Seq	HESC	Human
FN1	SREBP1	19666523	ChIP-Seq	LIVER	Mouse
FN1	AR	22383394	ChIP-Seq	PROSTATE CANCER	Human
FN1	POU3F2	20337985	ChIP-ChIP	501MEL	Human
FN1	TRIM28	19339689	ChIP-ChIP	MESC	Mouse
FN1	POU5F1	18692474	ChIP-Seq	MESC	Mouse
FN1	FOXM1	26100407		CHIP-SEQ	Hek293 flp-in binds to the promoter region of FN1.
FN1	KDM5B	21448134	ChIP-Seq	MESC	Mouse
FN1	AHR	22903824	ChIP-Seq	MCF7	Human
FN1	CREB1	20920259	ChIP-Seq	GC1-SPG	Mouse
FN1	SMAD3	21741376	ChIP-Seq	HESC	Human
FN1	EP300	20729851	ChIP-Seq	FORBRAIN MIDBRAIN LIMB HEART	Mouse
FN1	TP63	23658742	ChIP-Seq	EP156T	Human
FN1	CTNNB1	20460455	ChIP-Seq	HCT116	Human
FN1	TCF3	18692474	ChIP-Seq	MESC	Mouse
FN1	MYCN	18555785	ChIP-Seq	MESC	Mouse
FN1	KLF4	19030024	ChIP-ChIP	MESC	Mouse
FN1	MNX1	26342078	ChIP-Seq	MIN6-4N	Mouse
FN1	ARNT	22903824	ChIP-Seq	MCF7	Human
FN1	TCF3	18347094	ChIP-ChIP	MESC	Mouse
FN1	POU5F1	18347094	ChIP-ChIP	MESC	Mouse
FN1	SOX2	18358816	ChIP-ChIP	MESC	Mouse
FN1	STAT3	23295773	ChIP-Seq	U87	Human
FN1	RUNX2	22187159	ChIP-Seq	PCA	Human
FN1	HNF4A	19761587	ChIP-ChIP	CACO-2	Human
FN1	TOP2B	26459242	ChIP-Seq	MCF7	Human
FN1	GATA2	19941826	ChIP-Seq	K562	Human
FN1	TCF4	23295773	ChIP-Seq	U87	Human
FN1	NR3C1	21868756	ChIP-Seq	MCF10A	Human
FN1	SALL4	18804426ESC	ChIP-ChIP	MESC	Mouse
FN1	CREM	20920259	ChIP-Seq	GC1-SPG	Mouse
FN1	POU5F1	18358816	ChIP-ChIP	MESC	Mouse
FN1	RARG	19884340	ChIP-ChIP	MEF	Mouse
FN1	SRY	25088423	ChIP-ChIP	EMBRYONIC GONADS	Mouse
FN1	E2F1	18555785	ChIP-Seq	MESC	Mouse
FN1	NFE2L2	20460467	ChIP-Seq	MEF	Mouse
FN1	MYC	18358816	ChIP-ChIP	MESC	Mouse
FN1	NRF2	20460467	ChIP-Seq	MEF	Mouse
FN1	SMAD4	21741376	ChIP-Seq	HESC	Human
FN1	NANOG	18358816	ChIP-ChIP	MESC	Mouse
FN1	RELA	24523406	ChIP-Seq	FIBROSARCOMA	Human
FN1	SOX2	18692474	ChIP-Seq	MESC	Mouse
FN1	KLF5	25053715	ChIP-Seq	YYC3	Human
FN1	RBPJ	21746931	ChIP-Seq	IB4-LCL	Human
FN1	SIN3A	21632747	ChIP-Seq	MESC	Mouse
FN1	OLIG2	26023283	ChIP-Seq	AINV15	Mouse
FN1	NANOG	18700969	ChIP-ChIP	MESC	Mouse
FN1	TCFAP2C	20176728	ChIP-ChIP	TROPHOBLAST STEM CELLS	Mouse
FN1	ATF3	23680149	ChIP-Seq	GBM1-GSC	Human
FN1	HNF4A	19822575	ChIP-Seq	HepG2	Human
FN1	YAP1	20516196	ChIP-Seq	MESC	Mouse
FN1	KLF4	18358816	ChIP-ChIP	MESC	Mouse
FN1	NR0B1	18358816	ChIP-ChIP	MESC	Mouse
FN1	FOXA2	19822575	ChIP-Seq	HepG2	Human
FN1	STAT3	24763339	ChIP-Seq	IMN-ESCS	Mouse
FN1	MYC	19915707	ChIP-ChIP	AK7	Human
FN1	NUCKS1	24931609	ChIP-Seq	HEPATOCYTES	Mouse
FN1	ESR1	22446102	ChIP-Seq	UTERI	Mouse
VCAN	MECOM	23826213	ChIP-Seq	KASUMI	Mouse
VCAN	PRDM14	21183938	ChIP-Seq	MESC	Mouse
VCAN	AR	22383394	ChIP-Seq	PROSTATE CANCER	Human
VCAN	POU3F2	20337985	ChIP-ChIP	501MEL	Human
VCAN	FOXO1	25302145	ChIP-Seq	T-LYMPHOCYTE	Mouse
VCAN	MTF2	20144788	ChIP-Seq	MESC	Mouse
VCAN	MEIS1	26253404	ChIP-Seq	OPTIC CUPS	Mouse
VCAN	TP53	22573176	ChIP-Seq	HFKS	Human
VCAN	EP300	20729851	ChIP-Seq	FORBRAIN MIDBRAIN LIMB HEART	Mouse
VCAN	YY1	23942234	ChIP-Seq	MYOBLASTS AND MYOTUBES	Mouse
VCAN	BMI1	19503595	ChIP-Seq	MEFC	Mouse
VCAN	NCOR1	26117541	ChIP-Seq	K562	Human
VCAN	RUNX2	22187159	ChIP-Seq	PCA	Human
VCAN	FOXM1	26456572	ChIP-Seq	MCF7	Human
VCAN	MYB	21317192	ChIP-Seq	ERMYB	Mouse
VCAN	TOP2B	26459242	ChIP-Seq	MCF7	Human
VCAN	FOXP1	21924763	ChIP-Seq	HESC	Human
VCAN	WT1	25993318	ChIP-Seq	PODOCYTE	Human
VCAN	TCF4	23295773	ChIP-Seq	U87	Human
VCAN	HOXC9	25013753	ChIP-Seq	NEUROBLASTOMA BE2-C	Human
VCAN	RNF2	18974828	ChIP-Seq	MESC	Mouse
VCAN	NFE2L2	20460467	ChIP-Seq	MEF	Mouse
VCAN	NRF2	20460467	ChIP-Seq	MEF	Mouse
VCAN	EZH2	18974828	ChIP-Seq	MESC	Mouse
VCAN	BCL6	25482012	ChIP-Seq	CML-JURL-MK1	Human
VCAN	SUZ12	20075857	ChIP-Seq	MESC	Mouse
VCAN	ASH2L	23239880	ChIP-Seq	MESC	Mouse
VCAN	TAL1	20566737	ChIP-Seq	PRIMARY FETAL LIVER ERYTHROID	Mouse
VCAN	SMAD4	21799915	ChIP-Seq	A2780	Human
VCAN	HNF4A	19822575	ChIP-Seq	HepG2	Human
VCAN	SUZ12	18974828	ChIP-Seq	MESC	Mouse
CTSB	UN	26020271	ChIP-Seq	SMOOTH MUSCLE	Human
CTSB	GATA1	19941826	ChIP-Seq	K562	Human
CTSB	SOX2	20726797	ChIP-Seq	SW620	Human
CTSB	ASXL1	24218140	ChIP-Seq	BMDM	Mouse
CTSB	PPARD	21283829	ChIP-Seq	MYOFIBROBLAST	Human
CTSB	ESR1	17901129	ChIP-ChIP	liver	Mouse
CTSB	CDX2	20551321	ChIP-Seq	CACO-2	Human
CTSB	KDM5B	21448134	ChIP-Seq	MESC	Mouse
CTSB	TRP63	18441228	ChIP-ChIP	KERATINOCYTES	Mouse
CTSB	SMAD2	18955504	ChIP-ChIP	HaCaT	Human
CTSB	ZFX	18555785	ChIP-Seq	MESC	Mouse
CTSB	TAL1	20887958	ChIP-Seq	HPC-7	Mouse
CTSB	TP53	22573176	ChIP-Seq	HFKS	Human
CTSB	CTNNB1	20460455	ChIP-Seq	HCT116	Human
CTSB	CEBPA	26348894	ChIP-Seq	LIVER	Mouse
CTSB	ESRRB	18555785	ChIP-Seq	MESC	Mouse
CTSB	WT1	19549856	ChIP-ChIP	Wilms tumor-derived CCG99	11 binds to the promoter region of CTSB.
CTSB	HSF1	23293686	ChIP-Seq	STHDH STRIATAL	Mouse
CTSB	GRHL2	25758223	ChIP-Seq	PLACENTA	Mouse
CTSB	SCL	21571218	ChIP-Seq	MEGAKARYOCYTES	Human
CTSB	MITF	21258399	ChIP-Seq	MELANOMA	Human
CTSB	PPARG	20887899	ChIP-Seq	3T3-L1 PREADIPOCYTE	Mouse
CTSB	THAP11	20581084	ChIP-Seq	MESC	Mouse
CTSB	SMAD3	18955504	ChIP-ChIP	HaCaT	Human
CTSB	EOMES	20176728	ChIP-ChIP	TROPHOBLAST STEM CELLS	Mouse
CTSB	SMARCA4	20176728	ChIP-ChIP	TROPHOBLAST STEM CELLS	Mouse
CTSB	ZFP281	18757296	ChIP-ChIP	E14	Mouse
CTSB	KLF1	20508144	ChIP-Seq	FETAL-LIVER-ERYTHROID	Mouse
CTSB	RUNX2	22187159	ChIP-Seq	PCA	Human
CTSB	GATA2	19941826	ChIP-Seq	K562	Human
CTSB	VDR	24787735	ChIP-Seq	THP-1	Human
CTSB	RARG	19884340	ChIP-ChIP	MEF	Mouse
CTSB	ELF1	20517297	ChIP-Seq	JURKAT	Human
CTSB	SRY	25088423	ChIP-ChIP	EMBRYONIC GONADS	Mouse
CTSB	GATA1	21571218	ChIP-Seq	MEGAKARYOCYTES	Human
CTSB	E2F1	18555785	ChIP-Seq	MESC	Mouse
CTSB	NFE2L2	20460467	ChIP-Seq	MEF	Mouse
CTSB	NRF2	20460467	ChIP-Seq	MEF	Mouse
CTSB	RELA	24523406	ChIP-Seq	FIBROSARCOMA	Human
CTSB	SOX2	18692474	ChIP-Seq	MESC	Mouse
CTSB	EGR1	20690147	ChIP-Seq	ERYTHROLEUKEMIA	Human
CTSB	BCL6	25482012	ChIP-Seq	CML-JURL-MK1	Human
CTSB	TAL1	20566737	ChIP-Seq	PRIMARY FETAL LIVER ERYTHROID	Mouse
CTSB	TCFAP2C	20176728	ChIP-ChIP	TROPHOBLAST STEM CELLS	Mouse
CTSB	STAT4	19710469	ChIP-ChIP	TH1	Mouse
CTSB	TCF7	22412390	ChIP-Seq	EML	Mouse
CTSB	IRF8	21731497	ChIP-ChIP	J774	Mouse
CTSB	HNF4A	19822575	ChIP-Seq	HepG2	Human
CTSB	SOX17	20123909	ChIP-Seq	XEN	Mouse
CTSB	YAP1	20516196	ChIP-Seq	MESC	Mouse
CTSB	TCF7L2	21901280	ChIP-Seq	H4IIE	Rat binds to the promoter region of CTSB.
CTSB	NR0B1	18358816	ChIP-ChIP	MESC	Mouse
CTSB	JUND	26020271	ChIP-Seq	SMOOTH MUSCLE	Human
CTSB	FOXA2	19822575	ChIP-Seq	HepG2	Human
CTSB	WDR5	24793694	ChIP-Seq	LNCAP	Human
CTSB	ERG	20887958	ChIP-Seq	HPC-7	Mouse
CTSB	PRDM5	23873026	ChIP-Seq	MEF	Mouse
COL1A1	JUN	26020271	ChIP-Seq	SMOOTH MUSCLE	Human
COL1A1	TCF21	26020271	ChIP-Seq	SMOOTH MUSCLE	Human
COL1A1	RUNX2	24764292	ChIP-Seq	MC3T3	Mouse
COL1A1	GATA1	19941826	ChIP-Seq	K562	Human
COL1A1	FOXO1	25302145	ChIP-Seq	T-LYMPHOCYTE	Mouse
COL1A1	TP53	22573176	ChIP-Seq	HFKS	Human
COL1A1	TP53	18474530	ChIP-ChIP	U2OS	Human
COL1A1	EP300	20729851	ChIP-Seq	FORBRAIN MIDBRAIN LIMB HEART	Mouse
COL1A1	WT1	19549856	ChIP-ChIP	Wilms tumor-derived CCG99	11 binds to the promoter region of COL1A1.
COL1A1	MNX1	26342078	ChIP-Seq	MIN6-4N	Mouse
COL1A1	CREB1	23762244	ChIP-Seq	HIPPOCAMPUS	Rat binds to the promoter region of COL1A1.
COL1A1	NCOR1	26117541	ChIP-Seq	K562	Human
COL1A1	ZFP281	18757296	ChIP-ChIP	E14	Mouse
COL1A1	SETDB1	19884257	ChIP-Seq	MESC	Mouse
COL1A1	GATA2	19941826	ChIP-Seq	K562	Human
COL1A1	FOXP1	21924763	ChIP-Seq	HESC	Human
COL1A1	RARG	19884340	ChIP-ChIP	MEF	Mouse
COL1A1	SRY	25088423	ChIP-ChIP	EMBRYONIC GONADS	Mouse
COL1A1	CEBPB	20176806	ChIP-Seq	THIOMACROPHAGE	Mouse
COL1A1	TP53	23651856	ChIP-Seq	MEF	Mouse
COL1A1	EGR1	20690147	ChIP-Seq	ERYTHROLEUKEMIA	Human
COL1A1	OLIG2	26023283	ChIP-Seq	AINV15	Mouse
COL1A1	BRD4	25478319	ChIP-Seq	HGPS	Human
COL1A1	PAX6	23342162	ChIP-ChIP	BETA-FORBRAIN-LENS	Mouse
COL1A1	SETDB1	19884255	ChIP-Seq	MESC	Mouse
COL1A1	RAD21	21589869	ChIP-Seq	MESC	Mouse
COL1A1	TP53	22127205	ChIP-Seq	IMR90	Human
COL1A1	JUND	26020271	ChIP-Seq	SMOOTH MUSCLE	Human
COL1A1	STAT3	24763339	ChIP-Seq	IMN-ESCS	Mouse
COL1A1	TFAP2A	17053090	ChIP-ChIP	MCF7	Human
COL1A1	MYC	19915707	ChIP-ChIP	AK7	Human
COL1A1	PPARD	23176727	ChIP-Seq	KERATINOCYTES	Mouse
AGT	ESR1	15608294	ChIP-ChIP	MCF7	Human
AGT	NEUROD2	26341353	ChIP-Seq	CORTEX	Mouse
AGT	TCF4	18268006	ChIP-ChIP	LS174T	Human
AGT	MITF	21258399	ChIP-Seq	MELANOMA	Human
AGT	CUX1	19635798	ChIP-ChIP	MULTIPLE Human_ CANCER TYPES	Human
AGT	RUNX2	22187159	ChIP-Seq	PCA	Human
AGT	SOX9	25088423	ChIP-ChIP	EMBRYONIC GONADS	Mouse
AGT	SRY	25088423	ChIP-ChIP	EMBRYONIC GONADS	Mouse
AGT	AR	20517297	ChIP-Seq	VCAP	Human
AGT	GBX2	23144817	ChIP-Seq	PC3	Human
AGT	NR1H3	23393188	ChIP-Seq	ATHEROSCLEROTIC-FOAM	Human
AGT	RELA	24523406	ChIP-Seq	FIBROSARCOMA	Human
AGT	PDX1	19855005	ChIP-ChIP	MIN6	Mouse
AGT	HNF4A	19822575	ChIP-Seq	HepG2	Human
AGT	PPARG	19300518	ChIP-PET	3T3-L1 preadipocyte	Mouse
AGT	E2F1	21310950	ChIP-Seq	MCF7	Human
AGT	JUN	21703547	ChIP-Seq	K562	Human
ANXA5	ELK1	22589737	ChIP-Seq	MCF10A	Human
ANXA5	JUN	26020271	ChIP-Seq	SMOOTH MUSCLE	Human
ANXA5	RUNX2	24764292	ChIP-Seq	MC3T3	Mouse
ANXA5	MYBL2	22936984	ChIP-ChIP	MESC	Mouse
ANXA5	SOX2	20726797	ChIP-Seq	SW620	Human
ANXA5	PRDM14	21183938	ChIP-Seq	MESC	Mouse
ANXA5	AR	22383394	ChIP-Seq	PROSTATE CANCER	Human
ANXA5	POU3F2	20337985	ChIP-ChIP	501MEL	Human
ANXA5	TET1	21490601	ChIP-Seq	MESC	Mouse
ANXA5	CEBPA	26348894	ChIP-Seq	LIVER	Mouse
ANXA5	SOX9	24532713	ChIP-Seq	HFSC	Mouse
ANXA5	ESRRB	18555785	ChIP-Seq	MESC	Mouse
ANXA5	KLF4	18555785	ChIP-Seq	MESC	Mouse
ANXA5	TCF3	18347094	ChIP-ChIP	MESC	Mouse
ANXA5	GRHL2	25758223	ChIP-Seq	PLACENTA	Mouse
ANXA5	MITF	21258399	ChIP-Seq	MELANOMA	Human
ANXA5	PPARG	20887899	ChIP-Seq	3T3-L1 PREADIPOCYTE	Mouse
ANXA5	CUX1	19635798	ChIP-ChIP	MULTIPLE Human_ CANCER TYPES	Human
ANXA5	SRF	21415370	ChIP-Seq	HL-1	Mouse
ANXA5	SMARCA4	20176728	ChIP-ChIP	TROPHOBLAST STEM CELLS	Mouse
ANXA5	BCL3	23251550	ChIP-Seq	MUSCLE	Mouse
ANXA5	RUNX2	22187159	ChIP-Seq	PCA	Human
ANXA5	TTF2	22483619	ChIP-Seq	HELA	Human
ANXA5	TCF4	23295773	ChIP-Seq	U87	Human
ANXA5	KLF5	20875108	ChIP-Seq	MESC	Mouse
ANXA5	RUNX1	21571218	ChIP-Seq	MEGAKARYOCYTES	Human
ANXA5	SRY	25088423	ChIP-ChIP	EMBRYONIC GONADS	Mouse
ANXA5	TP53	23651856	ChIP-Seq	MEF	Mouse
ANXA5	SMAD4	21741376	ChIP-Seq	HESC	Human
ANXA5	EGR1	20690147	ChIP-Seq	ERYTHROLEUKEMIA	Human
ANXA5	WT1	20215353	ChIP-ChIP	NEPHRON PROGENITOR	Mouse
ANXA5	TCFAP2C	20176728	ChIP-ChIP	TROPHOBLAST STEM CELLS	Mouse
ANXA5	STAT4	19710469	ChIP-ChIP	TH1	Mouse
ANXA5	ATF3	23680149	ChIP-Seq	GBM1-GSC	Human
ANXA5	SMAD4	21799915	ChIP-Seq	A2780	Human
ANXA5	HNF4A	19822575	ChIP-Seq	HepG2	Human
ANXA5	YAP1	20516196	ChIP-Seq	MESC	Mouse
ANXA5	KLF4	18358816	ChIP-ChIP	MESC	Mouse
ANXA5	JUND	26020271	ChIP-Seq	SMOOTH MUSCLE	Human
ANXA5	FOXA2	19822575	ChIP-Seq	HepG2	Human
ANXA5	NANOG	16518401	ChIP-PET	MESC	Mouse
ANXA5	ESR1	22446102	ChIP-Seq	UTERI	Mouse
ANXA6	NR1I2	20693526	ChIP-Seq	LIVER	Mouse
ANXA6	SPI1	22096565	ChIP-ChIP	GC-B	Mouse
ANXA6	RUNX1	22412390	ChIP-Seq	EML	Mouse
ANXA6	NANOG	18347094	ChIP-ChIP	MESC	Mouse
ANXA6	POU5F1	18692474	ChIP-Seq	MESC	Mouse
ANXA6	FOXO1	25302145	ChIP-Seq	T-LYMPHOCYTE	Mouse
ANXA6	KDM5B	21448134	ChIP-Seq	MESC	Mouse
ANXA6	CREB1	20920259	ChIP-Seq	GC1-SPG	Mouse
ANXA6	TFEB	21752829	ChIP-Seq	HELA	Human
ANXA6	ESRRB	18555785	ChIP-Seq	MESC	Mouse
ANXA6	MNX1	26342078	ChIP-Seq	MIN6-4N	Mouse
ANXA6	TCF3	18347094	ChIP-ChIP	MESC	Mouse
ANXA6	POU5F1	18347094	ChIP-ChIP	MESC	Mouse
ANXA6	ZFP281	18757296	ChIP-ChIP	E14	Mouse
ANXA6	RUNX2	22187159	ChIP-Seq	PCA	Human
ANXA6	SPI1	20517297	ChIP-Seq	HL60	Human
ANXA6	SOX9	25088423	ChIP-ChIP	EMBRYONIC GONADS	Mouse
ANXA6	KLF5	20875108	ChIP-Seq	MESC	Mouse
ANXA6	RUNX1	21571218	ChIP-Seq	MEGAKARYOCYTES	Human
ANXA6	GATA1	21571218	ChIP-Seq	MEGAKARYOCYTES	Human
ANXA6	CEBPB	20176806	ChIP-Seq	THIOMACROPHAGE	Mouse
ANXA6	E2F1	18555785	ChIP-Seq	MESC	Mouse
ANXA6	TP53	23651856	ChIP-Seq	MEF	Mouse
ANXA6	AUTS2	25519132	ChIP-Seq	293T-REX	Human
ANXA6	CRX	20693478	ChIP-Seq	ADULT RETINA	Mouse
ANXA6	EGR1	20690147	ChIP-Seq	ERYTHROLEUKEMIA	Human
ANXA6	GATA3	24758297	ChIP-Seq	MCF7	Human
ANXA6	ESR1	20079471	ChIP-ChIP	T-47D	Human
ANXA6	RAD21	21589869	ChIP-Seq	MESC	Mouse
ANXA6	HNF4A	19822575	ChIP-Seq	HepG2	Human
ANXA6	SIN3B	21632747	ChIP-Seq	MESC	Mouse
ANXA6	PPARD	23176727	ChIP-Seq	KERATINOCYTES	Mouse
ANXA6	PPARG	20176806	ChIP-Seq	THIOMACROPHAGE	Mouse
LAMB1	FOXM1	26100407		CHIP-SEQ	Hek293 flp-in binds to the promoter region of LAMB1.
LAMB1	TP63	23658742	ChIP-Seq	EP156T	Human
LAMB1	KLF4	19030024	ChIP-ChIP	MESC	Mouse
LAMB1	ARNT	22903824	ChIP-Seq	MCF7	Human
LAMB1	ETV2	25802403	ChIP-Seq	MESC	Mouse
LAMB1	STAT3	23295773	ChIP-Seq	U87	Human
LAMB1	FOXM1	26456572	ChIP-Seq	MCF7	Human
LAMB1	TOP2B	26459242	ChIP-Seq	MCF7	Human
LAMB1	GATA2	19941826	ChIP-Seq	K562	Human
LAMB1	WT1	25993318	ChIP-Seq	PODOCYTE	Human
LAMB1	SPI1	20517297	ChIP-Seq	HL60	Human
LAMB1	TP63	22573176	ChIP-Seq	HFKS	Human
LAMB1	AUTS2	25519132	ChIP-Seq	293T-REX	Human
LAMB1	EGR1	20690147	ChIP-Seq	ERYTHROLEUKEMIA	Human
LAMB1	GATA3	24758297	ChIP-Seq	MCF7	Human
LAMB1	GATA4	25053715	ChIP-Seq	YYC3	Human
LAMB1	ELK3	25401928	ChIP-Seq	HUVEC	Human
LAMB1	GATA2	21666600	ChIP-Seq	HMVEC	Human
LAMB1	SMAD4	21799915	ChIP-Seq	A2780	Human
LAMB1	HNF4A	19822575	ChIP-Seq	HepG2	Human
LAMB1	SIN3B	21632747	ChIP-Seq	MESC	Mouse
FBLN2	REST	21632747	ChIP-Seq	MESC	Mouse
FBLN2	TCF21	26020271	ChIP-Seq	SMOOTH MUSCLE	Human
FBLN2	RARB	24833708	ChIP-Seq	LIVER	Mouse
FBLN2	RUNX2	24764292	ChIP-Seq	MC3T3	Mouse
FBLN2	GATA1	19941826	ChIP-Seq	K562	Human
FBLN2	EOMES	21245162	ChIP-Seq	HESC	Human
FBLN2	AHR	22903824	ChIP-Seq	MCF7	Human
FBLN2	DROSHA	22980978	ChIP-Seq	HELA	Human
FBLN2	NEUROD2	26341353	ChIP-Seq	CORTEX	Mouse
FBLN2	EP300	20729851	ChIP-Seq	FORBRAIN MIDBRAIN LIMB HEART	Mouse
FBLN2	TP63	23658742	ChIP-Seq	EP156T	Human
FBLN2	TET1	21490601	ChIP-Seq	MESC	Mouse
FBLN2	RCOR1	19997604	ChIP-ChIP	NEURONS	Mouse
FBLN2	SOX2	21211035	ChIP-Seq	LN229	Gbm binds to the promoter region of FBLN2.
FBLN2	GATA2	21571218	ChIP-Seq	MEGAKARYOCYTES	Human
FBLN2	ARNT	22903824	ChIP-Seq	MCF7	Human
FBLN2	HSF1	23293686	ChIP-Seq	STHDH STRIATAL	Mouse
FBLN2	MITF	21258399	ChIP-Seq	MELANOMA	Human
FBLN2	PPARG	20887899	ChIP-Seq	3T3-L1 PREADIPOCYTE	Mouse
FBLN2	CUX1	19635798	ChIP-ChIP	MULTIPLE Human_ CANCER TYPES	Human
FBLN2	GATA4	21415370	ChIP-Seq	HL-1	Mouse
FBLN2	STAT3	23295773	ChIP-Seq	U87	Human
FBLN2	SPI1	23547873	ChIP-Seq	NB4	Human
FBLN2	EP300	21415370	ChIP-Seq	HL-1	Mouse
FBLN2	GATA2	19941826	ChIP-Seq	K562	Human
FBLN2	RARG	19884340	ChIP-ChIP	MEF	Mouse
FBLN2	SOX9	25088423	ChIP-ChIP	EMBRYONIC GONADS	Mouse
FBLN2	GATA1	21571218	ChIP-Seq	MEGAKARYOCYTES	Human
FBLN2	RXRA	24833708	ChIP-Seq	LIVER	Mouse
FBLN2	TP53	23651856	ChIP-Seq	MEF	Mouse
FBLN2	SMAD4	21741376	ChIP-Seq	HESC	Human
FBLN2	EGR1	20690147	ChIP-Seq	ERYTHROLEUKEMIA	Human
FBLN2	BCL6	25482012	ChIP-Seq	CML-JURL-MK1	Human
FBLN2	SIN3B	21632747	ChIP-Seq	MESC	Mouse
FBLN2	ESR1	22446102	ChIP-Seq	UTERI	Mouse
LAMC1	CCND1	20090754	ChIP-ChIP	RETINA	Mouse
LAMC1	JUN	26020271	ChIP-Seq	SMOOTH MUSCLE	Human
LAMC1	TCF21	26020271	ChIP-Seq	SMOOTH MUSCLE	Human
LAMC1	EBNA2	21746931	ChIP-Seq	IB4-LCL	Human
LAMC1	MYC	19030024	ChIP-ChIP	MESC	Mouse
LAMC1	PAX3-FKHR	20663909	ChIP-Seq	RHABDOMYOSARCOMA	Human
LAMC1	STAT3	18555785	ChIP-Seq	MESC	Mouse
LAMC1	ZNF217	24962896	ChIP-Seq	MCF7	Human
LAMC1	GATA6	25053715	ChIP-Seq	YYC3	Human
LAMC1	YY1	22570637	ChIP-Seq	MALME-3M	Human
LAMC1	AR	22383394	ChIP-Seq	PROSTATE CANCER	Human
LAMC1	POU3F1	26484290	ChIP-Seq	ESC	Mouse
LAMC1	FOXA1	25552417	ChIP-Seq	VCAP	Human
LAMC1	ESR2	21235772	ChIP-Seq	MCF-7	Human
LAMC1	FOXM1	26100407		CHIP-SEQ	Hek293 flp-in binds to the promoter region of LAMC1.
LAMC1	RUNX1	17652178	ChIP-ChIP	JURKAT	Human
LAMC1	KDM5B	21448134	ChIP-Seq	MESC	Mouse
LAMC1	FOXO3	22982991	ChIP-Seq	MACROPHAGES	Mouse
LAMC1	SMAD2	18955504	ChIP-ChIP	HaCaT	Human
LAMC1	NEUROD2	26341353	ChIP-Seq	CORTEX	Mouse
LAMC1	MYCN	18555785	ChIP-Seq	MESC	Mouse
LAMC1	EZH2	23942234	ChIP-Seq	MYOBLASTS AND MYOTUBES	Mouse
LAMC1	SOX2	21211035	ChIP-Seq	LN229	Gbm binds to the promoter region of LAMC1.
LAMC1	YY1	23942234	ChIP-Seq	MYOBLASTS AND MYOTUBES	Mouse
LAMC1	MITF	21258399	ChIP-Seq	MELANOMA	Human
LAMC1	SMAD3	18955504	ChIP-ChIP	HaCaT	Human
LAMC1	EOMES	20176728	ChIP-ChIP	TROPHOBLAST STEM CELLS	Mouse
LAMC1	ZFP281	18757296	ChIP-ChIP	E14	Mouse
LAMC1	RCOR3	21632747	ChIP-Seq	MESC	Mouse
LAMC1	BCL3	23251550	ChIP-Seq	MUSCLE	Mouse
LAMC1	RUNX2	22187159	ChIP-Seq	PCA	Human
LAMC1	FOXM1	26456572	ChIP-Seq	MCF7	Human
LAMC1	HNF4A	19761587	ChIP-ChIP	CACO-2	Human
LAMC1	SPI1	23547873	ChIP-Seq	NB4	Human
LAMC1	WT1	25993318	ChIP-Seq	PODOCYTE	Human
LAMC1	NFIB	24661679	ChIP-Seq	E16.5 LUNG	Mouse
LAMC1	SALL4	18804426ESC	ChIP-ChIP	MESC	Mouse
LAMC1	CREM	20920259	ChIP-Seq	GC1-SPG	Mouse
LAMC1	RARG	19884340	ChIP-ChIP	MEF	Mouse
LAMC1	SPI1	20517297	ChIP-Seq	HL60	Human
LAMC1	TP63	22573176	ChIP-Seq	HFKS	Human
LAMC1	RUNX1	21571218	ChIP-Seq	MEGAKARYOCYTES	Human
LAMC1	ELF1	20517297	ChIP-Seq	JURKAT	Human
LAMC1	E2F1	18555785	ChIP-Seq	MESC	Mouse
LAMC1	NFE2L2	20460467	ChIP-Seq	MEF	Mouse
LAMC1	SPI1	20176806	ChIP-Seq	THIOMACROPHAGE	Mouse
LAMC1	NRF2	20460467	ChIP-Seq	MEF	Mouse
LAMC1	EWS-ERG	20517297	ChIP-Seq	CADO-ES1	Human
LAMC1	NANOG	18358816	ChIP-ChIP	MESC	Mouse
LAMC1	EGR1	20690147	ChIP-Seq	ERYTHROLEUKEMIA	Human
LAMC1	GATA4	25053715	ChIP-Seq	YYC3	Human
LAMC1	WT1	20215353	ChIP-ChIP	NEPHRON PROGENITOR	Mouse
LAMC1	RBPJ	21746931	ChIP-Seq	IB4-LCL	Human
LAMC1	ASH2L	23239880	ChIP-Seq	MESC	Mouse
LAMC1	TCFAP2C	20176728	ChIP-ChIP	TROPHOBLAST STEM CELLS	Mouse
LAMC1	STAT4	19710469	ChIP-ChIP	TH1	Mouse
LAMC1	TCF7	22412390	ChIP-Seq	EML	Mouse
LAMC1	SMAD4	21799915	ChIP-Seq	A2780	Human
LAMC1	HNF4A	19822575	ChIP-Seq	HepG2	Human
LAMC1	CEBPD	23245923	ChIP-Seq	MEF	Mouse
LAMC1	MEF2A	21415370	ChIP-Seq	HL-1	Mouse
LAMC1	SOX17	20123909	ChIP-Seq	XEN	Mouse
LAMC1	TCF7L2	21901280	ChIP-Seq	H4IIE	Rat binds to the promoter region of LAMC1.
LAMC1	JUND	26020271	ChIP-Seq	SMOOTH MUSCLE	Human
LAMC1	STAT3	24763339	ChIP-Seq	IMN-ESCS	Mouse
LAMC1	GATA3	20176728	ChIP-ChIP	TROPHOBLAST STEM CELLS	Mouse
LAMC1	FOXA1	25329375	ChIP-Seq	VCAP	Human
LAMC1	TCF3	18467660	ChIP-ChIP	MESC	Mouse
LAMC1	HOXB7	26014856	ChIP-Seq	BT474	Human
LAMC1	MYC	19915707	ChIP-ChIP	AK7	Human
LAMC1	NUCKS1	24931609	ChIP-Seq	HEPATOCYTES	Mouse
LAMC1	E2F4	21247883	ChIP-Seq	LYMPHOBLASTOID	Human
LAMC1	SMARCA4	23332759	ChIP-Seq	OLIGODENDROCYTES	Mouse
LAMC1	AR	21909140	ChIP-Seq	LNCAP	Human
LGALS3	REST	21632747	ChIP-Seq	MESC	Mouse
LGALS3	AR	25329375	ChIP-Seq	VCAP	Human
LGALS3	REST	18959480	ChIP-ChIP	MESC	Mouse
LGALS3	RUNX1	22412390	ChIP-Seq	EML	Mouse
LGALS3	RUNX2	24764292	ChIP-Seq	MC3T3	Mouse
LGALS3	GATA6	25053715	ChIP-Seq	YYC3	Human
LGALS3	AR	22383394	ChIP-Seq	PROSTATE CANCER	Human
LGALS3	FOXA1	25552417	ChIP-Seq	VCAP	Human
LGALS3	FOXM1	26100407		CHIP-SEQ	Hek293 flp-in binds to the promoter region of LGALS3.
LGALS3	MTF2	20144788	ChIP-Seq	MESC	Mouse
LGALS3	SMAD2	18955504	ChIP-ChIP	HaCaT	Human
LGALS3	EP300	20729851	ChIP-Seq	FORBRAIN MIDBRAIN LIMB HEART	Mouse
LGALS3	TP63	23658742	ChIP-Seq	EP156T	Human
LGALS3	SOX9	24532713	ChIP-Seq	HFSC	Mouse
LGALS3	ESRRB	18555785	ChIP-Seq	MESC	Mouse
LGALS3	KLF4	18555785	ChIP-Seq	MESC	Mouse
LGALS3	MITF	21258399	ChIP-Seq	MELANOMA	Human
LGALS3	SMAD3	18955504	ChIP-ChIP	HaCaT	Human
LGALS3	TAF7L	23326641	ChIP-Seq	C3H10T1-2	Mouse
LGALS3	EOMES	20176728	ChIP-ChIP	TROPHOBLAST STEM CELLS	Mouse
LGALS3	SMARCA4	20176728	ChIP-ChIP	TROPHOBLAST STEM CELLS	Mouse
LGALS3	KLF1	20508144	ChIP-Seq	FETAL-LIVER-ERYTHROID	Mouse
LGALS3	FOXM1	26456572	ChIP-Seq	MCF7	Human
LGALS3	GATA2	20887958	ChIP-Seq	HPC-7	Mouse
LGALS3	SUZ12	18692474	ChIP-Seq	MESC	Mouse
LGALS3	SALL4	18804426	ChIP-ChIP	XEN	Mouse
LGALS3	RUNX1	21571218	ChIP-Seq	MEGAKARYOCYTES	Human
LGALS3	AR	20517297	ChIP-Seq	VCAP	Human
LGALS3	NFE2L2	22581777	ChIP-Seq	LYMPHOBLASTOID	Human
LGALS3	RELA	24523406	ChIP-Seq	FIBROSARCOMA	Human
LGALS3	PBX1	22567123	ChIP-ChIP	OVCAR3	Human
LGALS3	GATA4	25053715	ChIP-Seq	YYC3	Human
LGALS3	KLF5	25053715	ChIP-Seq	YYC3	Human
LGALS3	SIN3A	21632747	ChIP-Seq	MESC	Mouse
LGALS3	FLI1	21571218	ChIP-Seq	MEGAKARYOCYTES	Human
LGALS3	SUZ12	20075857	ChIP-Seq	MESC	Mouse
LGALS3	TCFAP2C	20176728	ChIP-ChIP	TROPHOBLAST STEM CELLS	Mouse
LGALS3	HNF4A	19822575	ChIP-Seq	HepG2	Human
LGALS3	KLF4	18358816	ChIP-ChIP	MESC	Mouse
LGALS3	FOXM1	23109430	ChIP-Seq	U2OS	Human
LGALS3	GATA3	20176728	ChIP-ChIP	TROPHOBLAST STEM CELLS	Mouse
LGALS3	SIN3B	21632747	ChIP-Seq	MESC	Mouse
LGALS3	E2F4	21247883	ChIP-Seq	LYMPHOBLASTOID	Human
LGALS3	SMARCA4	23332759	ChIP-Seq	OLIGODENDROCYTES	Mouse
LGALS3	FOXP2	21765815	ChIP-ChIP	NEURO2A	Mouse
CTSG	VDR	24763502	ChIP-Seq	THP-1	Human
CTSG	MECOM	23826213	ChIP-Seq	KASUMI	Mouse
CTSG	POU3F2	20337985	ChIP-ChIP	501MEL	Human
CTSG	TP63	23658742	ChIP-Seq	EP156T	Human
CTSG	RCOR1	19997604	ChIP-ChIP	NEURONS	Mouse
CTSG	MNX1	26342078	ChIP-Seq	MIN6-4N	Mouse
CTSG	KLF4	25985364	ChIP-Seq	ATHEROSCLEROSIS LESION	Mouse
CTSG	ZFP281	18757296	ChIP-ChIP	E14	Mouse
CTSG	SPI1	23547873	ChIP-Seq	NB4	Human
CTSG	MYB	21317192	ChIP-Seq	ERMYB	Mouse
CTSG	SETDB1	19884257	ChIP-Seq	MESC	Mouse
CTSG	TCF4	23295773	ChIP-Seq	U87	Human
CTSG	AR	20517297	ChIP-Seq	VCAP	Human
CTSG	NR1H3	23393188	ChIP-Seq	ATHEROSCLEROTIC-FOAM	Human
CTSG	FLI1	21571218	ChIP-Seq	MEGAKARYOCYTES	Human
CTSG	FOXA1	25329375	ChIP-Seq	VCAP	Human
HSPG2	SPI1	23127762	ChIP-Seq	K562	Human
HSPG2	TCF21	26020271	ChIP-Seq	SMOOTH MUSCLE	Human
HSPG2	RUNX2	24764292	ChIP-Seq	MC3T3	Mouse
HSPG2	PAX3-FKHR	20663909	ChIP-Seq	RHABDOMYOSARCOMA	Human
HSPG2	GATA1	19941826	ChIP-Seq	K562	Human
HSPG2	PRDM14	21183938	ChIP-Seq	MESC	Mouse
HSPG2	PPARD	21283829	ChIP-Seq	MYOFIBROBLAST	Human
HSPG2	FOXA1	25552417	ChIP-Seq	VCAP	Human
HSPG2	KDM5B	21448134	ChIP-Seq	MESC	Mouse
HSPG2	DMRT1	23473982	ChIP-Seq	TESTES	Mouse
HSPG2	CREB1	20920259	ChIP-Seq	GC1-SPG	Mouse
HSPG2	EP300	20729851	ChIP-Seq	FORBRAIN MIDBRAIN LIMB HEART	Mouse
HSPG2	TP63	23658742	ChIP-Seq	EP156T	Human
HSPG2	CEBPA	26348894	ChIP-Seq	LIVER	Mouse
HSPG2	MITF	21258399	ChIP-Seq	MELANOMA	Human
HSPG2	PPARG	20887899	ChIP-Seq	3T3-L1 PREADIPOCYTE	Mouse
HSPG2	RCOR3	21632747	ChIP-Seq	MESC	Mouse
HSPG2	HNF4A	19761587	ChIP-ChIP	CACO-2	Human
HSPG2	POU5F1	16518401	ChIP-PET	MESC	Mouse
HSPG2	NKX2-5	21415370	ChIP-Seq	HL-1	Mouse
HSPG2	GATA2	19941826	ChIP-Seq	K562	Human
HSPG2	RUNX1	21571218	ChIP-Seq	MEGAKARYOCYTES	Human
HSPG2	GATA1	21571218	ChIP-Seq	MEGAKARYOCYTES	Human
HSPG2	TP53	23651856	ChIP-Seq	MEF	Mouse
HSPG2	RELA	24523406	ChIP-Seq	FIBROSARCOMA	Human
HSPG2	EGR1	20690147	ChIP-Seq	ERYTHROLEUKEMIA	Human
HSPG2	PBX1	22567123	ChIP-ChIP	OVCAR3	Human
HSPG2	GATA4	25053715	ChIP-Seq	YYC3	Human
HSPG2	KLF5	25053715	ChIP-Seq	YYC3	Human
HSPG2	ELK3	25401928	ChIP-Seq	HUVEC	Human
HSPG2	OLIG2	26023283	ChIP-Seq	AINV15	Mouse
HSPG2	GATA2	21666600	ChIP-Seq	HMVEC	Human
HSPG2	BRD4	25478319	ChIP-Seq	HGPS	Human
HSPG2	FLI1	21571218	ChIP-Seq	MEGAKARYOCYTES	Human
HSPG2	ATF3	23680149	ChIP-Seq	GBM1-GSC	Human
HSPG2	HNF4A	19822575	ChIP-Seq	HepG2	Human
HSPG2	FOXA2	19822575	ChIP-Seq	HepG2	Human
HSPG2	SIN3B	21632747	ChIP-Seq	MESC	Mouse
COL15A1	SPI1	23127762	ChIP-Seq	K562	Human
COL15A1	POU3F1	26484290	ChIP-Seq	ESC	Mouse
COL15A1	TRIM28	19339689	ChIP-ChIP	MESC	Mouse
COL15A1	MTF2	20144788	ChIP-Seq	MESC	Mouse
COL15A1	KDM5B	21448134	ChIP-Seq	MESC	Mouse
COL15A1	CREB1	20920259	ChIP-Seq	GC1-SPG	Mouse
COL15A1	DROSHA	22980978	ChIP-Seq	HELA	Human
COL15A1	SOX2	21211035	ChIP-Seq	LN229	Gbm binds to the promoter region of COL15A1.
COL15A1	MITF	21258399	ChIP-Seq	MELANOMA	Human
COL15A1	PPARG	20887899	ChIP-Seq	3T3-L1 PREADIPOCYTE	Mouse
COL15A1	CTBP1	25329375	ChIP-Seq	LNCAP	Human
COL15A1	EED	16625203	ChIP-ChIP	MESC	Mouse
COL15A1	CNOT3	19339689	ChIP-ChIP	MESC	Mouse
COL15A1	WT1	25993318	ChIP-Seq	PODOCYTE	Human
COL15A1	SUZ12	18692474	ChIP-Seq	MESC	Mouse
COL15A1	RNF2	16625203	ChIP-ChIP	MESC	Mouse
COL15A1	RNF2	18974828	ChIP-Seq	MESC	Mouse
COL15A1	EZH2	18974828	ChIP-Seq	MESC	Mouse
COL15A1	SUZ12	16625203	ChIP-ChIP	MESC	Mouse
COL15A1	TEAD4	22529382	ChIP-Seq	TROPHECTODERM	Mouse
COL15A1	EGR1	20690147	ChIP-Seq	ERYTHROLEUKEMIA	Human
COL15A1	SUZ12	20075857	ChIP-Seq	MESC	Mouse
COL15A1	GATA1	19941827	ChIP-Seq	MEL	Mouse
COL15A1	MYC	19915707	ChIP-ChIP	AK7	Human
COL15A1	ESR1	22446102	ChIP-Seq	UTERI	Mouse
COL15A1	SUZ12	18974828	ChIP-Seq	MESC	Mouse
ANXA1	ELK1	22589737	ChIP-Seq	MCF10A	Human
ANXA1	JUN	26020271	ChIP-Seq	SMOOTH MUSCLE	Human
ANXA1	AR	25329375	ChIP-Seq	VCAP	Human
ANXA1	RUNX2	24764292	ChIP-Seq	MC3T3	Mouse
ANXA1	ELK1	19687146	ChIP-ChIP	Hela	Human
ANXA1	PPARD	21283829	ChIP-Seq	MYOFIBROBLAST	Human
ANXA1	POU3F2	20337985	ChIP-ChIP	501MEL	Human
ANXA1	RUNX1	17652178	ChIP-ChIP	JURKAT	Human
ANXA1	SMAD4	19686287	ChIP-ChIP	HaCaT	Human
ANXA1	SMAD2	18955504	ChIP-ChIP	HaCaT	Human
ANXA1	TRIM28	21343339	ChIP-Seq	HEK293	Human
ANXA1	TP63	23658742	ChIP-Seq	EP156T	Human
ANXA1	SOX2	21211035	ChIP-Seq	LN229	Gbm binds to the promoter region of ANXA1.
ANXA1	YY1	23942234	ChIP-Seq	MYOBLASTS AND MYOTUBES	Mouse
ANXA1	PPARG	20887899	ChIP-Seq	3T3-L1 PREADIPOCYTE	Mouse
ANXA1	SMAD3	18955504	ChIP-ChIP	HaCaT	Human
ANXA1	CTBP2	25329375	ChIP-Seq	LNCAP	Human
ANXA1	STAT3	23295773	ChIP-Seq	U87	Human
ANXA1	FOXM1	26456572	ChIP-Seq	MCF7	Human
ANXA1	SPI1	23547873	ChIP-Seq	NB4	Human
ANXA1	TOP2B	26459242	ChIP-Seq	MCF7	Human
ANXA1	FOXP3	17237761	ChIP-ChIP	TREG	Mouse
ANXA1	RARG	19884340	ChIP-ChIP	MEF	Mouse
ANXA1	TP63	22573176	ChIP-Seq	HFKS	Human
ANXA1	NFE2L2	20460467	ChIP-Seq	MEF	Mouse
ANXA1	TP53	23651856	ChIP-Seq	MEF	Mouse
ANXA1	SPI1	20176806	ChIP-Seq	THIOMACROPHAGE	Mouse
ANXA1	NRF2	20460467	ChIP-Seq	MEF	Mouse
ANXA1	KLF5	25053715	ChIP-Seq	YYC3	Human
ANXA1	BRD4	25478319	ChIP-Seq	HGPS	Human
ANXA1	STAT4	19710469	ChIP-ChIP	TH1	Mouse
ANXA1	ATF3	23680149	ChIP-Seq	GBM1-GSC	Human
ANXA1	SOX17	20123909	ChIP-Seq	XEN	Mouse
ANXA1	YAP1	20516196	ChIP-Seq	MESC	Mouse
ANXA1	JUND	26020271	ChIP-Seq	SMOOTH MUSCLE	Human
ANXA1	PPARD	23208498	ChIP-Seq	MDA-MB-231	Human
ANXA1	NANOG	16153702	ChIP-ChIP	HESC	Human
ANXA1	SMARCA4	23332759	ChIP-Seq	OLIGODENDROCYTES	Mouse
LAMA4	TCF21	26020271	ChIP-Seq	SMOOTH MUSCLE	Human
LAMA4	PPARD	21283829	ChIP-Seq	MYOFIBROBLAST	Human
LAMA4	FOXA1	25552417	ChIP-Seq	VCAP	Human
LAMA4	FOXM1	26100407		CHIP-SEQ	Hek293 flp-in binds to the promoter region of LAMA4.
LAMA4	STAT5	23275557	ChIP-Seq	MAMMARY-EPITHELIUM	Mouse
LAMA4	EP300	20729851	ChIP-Seq	FORBRAIN MIDBRAIN LIMB HEART	Mouse
LAMA4	CTNNB1	20460455	ChIP-Seq	HCT116	Human
LAMA4	PPARG	20887899	ChIP-Seq	3T3-L1 PREADIPOCYTE	Mouse
LAMA4	STAT3	23295773	ChIP-Seq	U87	Human
LAMA4	RUNX2	22187159	ChIP-Seq	PCA	Human
LAMA4	WT1	25993318	ChIP-Seq	PODOCYTE	Human
LAMA4	TCF4	23295773	ChIP-Seq	U87	Human
LAMA4	SUZ12	18692474	ChIP-Seq	MESC	Mouse
LAMA4	SALL4	18804426	ChIP-ChIP	XEN	Mouse
LAMA4	LYL1	20887958	ChIP-Seq	HPC-7	Mouse
LAMA4	KLF5	20875108	ChIP-Seq	MESC	Mouse
LAMA4	TP63	22573176	ChIP-Seq	HFKS	Human
LAMA4	NFE2L2	20460467	ChIP-Seq	MEF	Mouse
LAMA4	SMAD	19615063	ChIP-ChIP	ovarian surface epithelium	Human
LAMA4	NRF2	20460467	ChIP-Seq	MEF	Mouse
LAMA4	TEAD4	22529382	ChIP-Seq	TROPHECTODERM	Mouse
LAMA4	GATA2	21666600	ChIP-Seq	HMVEC	Human
LAMA4	SUZ12	20075857	ChIP-Seq	MESC	Mouse
LAMA4	SETDB1	19884255	ChIP-Seq	MESC	Mouse
LAMA4	AR	19668381	ChIP-Seq	PC3	Human
LAMA4	SOX17	20123909	ChIP-Seq	XEN	Mouse
LAMA4	NANOG	16153702	ChIP-ChIP	HESC	Human
LAMA4	POU5F1	16153702	ChIP-ChIP	HESC	Human
LAMA4	SOX2	16153702	ChIP-ChIP	HESC	Human
LAMA4	ESR1	22446102	ChIP-Seq	UTERI	Mouse
COL6A6	REST	21632747	ChIP-Seq	MESC	Mouse
COL6A6	RARB	24833708	ChIP-Seq	LIVER	Mouse
COL6A6	KDM5B	21448134	ChIP-Seq	MESC	Mouse
COL6A6	MITF	21258399	ChIP-Seq	MELANOMA	Human
COL6A6	RCOR3	21632747	ChIP-Seq	MESC	Mouse
COL6A6	RUNX2	22187159	ChIP-Seq	PCA	Human
COL6A6	NFIB	24661679	ChIP-Seq	E16.5 LUNG	Mouse
COL6A6	KLF5	20875108	ChIP-Seq	MESC	Mouse
COL6A6	SIN3B	21632747	ChIP-Seq	MESC	Mouse
VWF	ESR1	21235772	ChIP-Seq	MCF-7	Human
VWF	NANOG	18347094	ChIP-ChIP	MESC	Mouse
VWF	STAT3	18555785	ChIP-Seq	MESC	Mouse
VWF	PRDM14	21183938	ChIP-Seq	MESC	Mouse
VWF	EOMES	21245162	ChIP-Seq	HESC	Human
VWF	PPARD	21283829	ChIP-Seq	MYOFIBROBLAST	Human
VWF	CDX2	20551321	ChIP-Seq	CACO-2	Human
VWF	ESR2	21235772	ChIP-Seq	MCF-7	Human
VWF	DMRT1	23473982	ChIP-Seq	TESTES	Mouse
VWF	TP53	22573176	ChIP-Seq	HFKS	Human
VWF	EZH2	23942234	ChIP-Seq	MYOBLASTS AND MYOTUBES	Mouse
VWF	SCL	21571218	ChIP-Seq	MEGAKARYOCYTES	Human
VWF	MITF	21258399	ChIP-Seq	MELANOMA	Human
VWF	PPARG	20887899	ChIP-Seq	3T3-L1 PREADIPOCYTE	Mouse
VWF	RCOR3	21632747	ChIP-Seq	MESC	Mouse
VWF	TCF4	23295773	ChIP-Seq	U87	Human
VWF	SOX9	25088423	ChIP-ChIP	EMBRYONIC GONADS	Mouse
VWF	CEBPB	20176806	ChIP-Seq	THIOMACROPHAGE	Mouse
VWF	BCL6	25482012	ChIP-Seq	CML-JURL-MK1	Human
VWF	GATA2	21666600	ChIP-Seq	HMVEC	Human
VWF	FLI1	21571218	ChIP-Seq	MEGAKARYOCYTES	Human
VWF	ASH2L	23239880	ChIP-Seq	MESC	Mouse
VWF	GATA1	19941827	ChIP-Seq	MEL	Mouse
VWF	E2F1	17053090	ChIP-ChIP	MCF7	Human
VWF	ATF3	23680149	ChIP-Seq	GBM1-GSC	Human
VWF	AR	19668381	ChIP-Seq	PC3	Human
VWF	HNF4A	19822575	ChIP-Seq	HepG2	Human
VWF	SIN3B	21632747	ChIP-Seq	MESC	Mouse
VWF	MYC	19915707	ChIP-ChIP	AK7	Human
VWF	PPARG	20176806	ChIP-Seq	THIOMACROPHAGE	Mouse
VWF	JUN	21703547	ChIP-Seq	K562	Human
ABI3BP	NR1I2	20693526	ChIP-Seq	LIVER	Mouse
ABI3BP	PAX3-FKHR	20663909	ChIP-Seq	RHABDOMYOSARCOMA	Human
ABI3BP	SALL4	22934838	ChIP-ChIP	CD34+	Human
ABI3BP	KDM5B	21448134	ChIP-Seq	MESC	Mouse
ABI3BP	TP63	23658742	ChIP-Seq	EP156T	Human
ABI3BP	SOX2	21211035	ChIP-Seq	LN229	Gbm binds to the promoter region of ABI3BP.
ABI3BP	CEBPA	26348894	ChIP-Seq	LIVER	Mouse
ABI3BP	CTBP2	25329375	ChIP-Seq	LNCAP	Human
ABI3BP	CTBP1	25329375	ChIP-Seq	LNCAP	Human
ABI3BP	STAT3	23295773	ChIP-Seq	U87	Human
ABI3BP	TOP2B	26459242	ChIP-Seq	MCF7	Human
ABI3BP	TCF4	23295773	ChIP-Seq	U87	Human
ABI3BP	TP63	22573176	ChIP-Seq	HFKS	Human
ABI3BP	KLF5	25053715	ChIP-Seq	YYC3	Human
ABI3BP	BRD4	25478319	ChIP-Seq	HGPS	Human
ABI3BP	AR	19668381	ChIP-Seq	PC3	Human
ABI3BP	SMAD4	21799915	ChIP-Seq	A2780	Human
TNXB	ELK1	22589737	ChIP-Seq	MCF10A	Human
TNXB	SUZ12	18555785	ChIP-Seq	MESC	Mouse
TNXB	JUN	26020271	ChIP-Seq	SMOOTH MUSCLE	Human
TNXB	RUNX2	24764292	ChIP-Seq	MC3T3	Mouse
TNXB	MTF2	20144788	ChIP-Seq	MESC	Mouse
TNXB	BACH1	22875853	ChIP-PCR	HELA AND SCP4	Human
TNXB	DROSHA	22980978	ChIP-Seq	HELA	Human
TNXB	JARID2	20075857	ChIP-Seq	MESC	Mouse
TNXB	TET1	21490601	ChIP-Seq	MESC	Mouse
TNXB	EZH2	23942234	ChIP-Seq	MYOBLASTS AND MYOTUBES	Mouse
TNXB	EED	16625203	ChIP-ChIP	MESC	Mouse
TNXB	FOXP1	21924763	ChIP-Seq	HESC	Human
TNXB	SUZ12	18692474	ChIP-Seq	MESC	Mouse
TNXB	TP63	22573176	ChIP-Seq	HFKS	Human
TNXB	CEBPB	20176806	ChIP-Seq	THIOMACROPHAGE	Mouse
TNXB	RNF2	18974828	ChIP-Seq	MESC	Mouse
TNXB	RARA	24833708	ChIP-Seq	LIVER	Mouse
TNXB	SPI1	20176806	ChIP-Seq	THIOMACROPHAGE	Mouse
TNXB	EZH2	18974828	ChIP-Seq	MESC	Mouse
TNXB	EGR1	20690147	ChIP-Seq	ERYTHROLEUKEMIA	Human
TNXB	ELK3	25401928	ChIP-Seq	HUVEC	Human
TNXB	SUZ12	20075857	ChIP-Seq	MESC	Mouse
TNXB	TCF7	22412390	ChIP-Seq	EML	Mouse
TNXB	HNF4A	19822575	ChIP-Seq	HepG2	Human
TNXB	MYCN	19997598	ChIP-ChIP	NEUROBLASTOMA	Human
TNXB	JUND	26020271	ChIP-Seq	SMOOTH MUSCLE	Human
TNXB	MYC	19915707	ChIP-ChIP	AK7	Human
TNXB	SUZ12	18974828	ChIP-Seq	MESC	Mouse

## Sheet: Table S23
Supplementary Table 23: Correlation of matrix index with immune cell gene signatures
Spearman correlation was performed for each of the immune signatures listed (Iglesia et al. 2016; PMID 27335052) and matrix index. P-values were FDR corrected using the Benjamini & Hochberg method.
Signature	Matrix_index
	p-value	r-value
Immunosuppression	p=0.8130(n=33)	0.0641711
B_Cell_Cluster	p=0.0625(n=33)	0.398396
B_Cell	p=0.0010(n=33)	0.667447
B_Cells	p=0.0010(n=33)	0.670455
BCell_60gene	p=0.0134(n=33)	0.527072
GO_BCR_Signaling	p=0.0804(n=33)	0.370321
IGG_Cluster	p=0.0175(n=33)	0.507687
TNBC_B_Cell	p=0.0163(n=33)	0.513369
CD8	p=0.8280(n=33)	-0.0578209
CD8_Cluster	p=0.1021(n=33)	0.347594
CD8_T_Cells	p=0.7210(n=33)	-0.0909091
T_Cell_Cluster	p=0.0587(n=33)	0.403743
T_Cell	p=0.0547(n=33)	0.409759
T_Cells	p=0.0512(n=33)	0.417112
GO_TCR_Signaling	p=0.0034(n=33)	0.606283
TNBC_T_Cell	p=0.1009(n=33)	0.348596
T_Helper_Cells	p=0.2901(n=33)	0.238302
Th1_Cells	p=0.9156(n=33)	0.0257353
Th2_Cells	p=0.0004(n=33)	0.715241
Th17_Cells	p=0.7910(n=33)	0.0701872
TReg	p=0.0003(n=33)	0.740307
Cytotoxic_Cells	p=0.9753(n=33)	0.00635027
IL_8	p=0.0027(n=33)	-0.620989
CD68_Cluster	p=0.5115(n=33)	0.15742
LCK	p=0.5152(n=33)	0.155414
Mac_CSF1	p=0.7321(n=33)	0.0862299
Macrophages	p=0.0308(n=33)	0.459893
MacTh1_Cluster	p=0.2897(n=33)	0.238636
Claudin	p=0.0037(n=33)	0.599933
EMT_DOWN	p=0.0015(n=33)	0.649733
EMT_UP	p=0.0212(n=33)	0.489305
TIC	p=0.8689(n=33)	-0.0454545
aDC	p=0.0034(n=33)	0.604612
DC	p=0.5510(n=33)	-0.144051
Eosinophils	p=0.0002(n=33)	-0.753342
iDC	p=0.0157(n=33)	0.515709
Mast_Cells	p=0.1027(n=33)	-0.346925
Neutrophils	p=0.0013(n=33)	-0.657086
NK_CD56bright_Cells	p=0.0112(n=33)	0.53877
NK_CD56dim_Cells	p=0.3320(n=33)	0.221257
NK_Cells	p=0.9113(n=33)	-0.0304144
pDC	p=0.0007(n=33)	-0.688168
Tcm	p=0.6956(n=33)	0.0989305
Tem	p=0.0155(n=33)	-0.517045
TFH	p=0.5977(n=33)	0.129011
Tgd	p=0.8517(n=33)	0.0508021
all_re_siggenes	p=0.0165(n=33)	0.512366
all_nr_siggenes	p=0.1073(n=33)	0.34258
fdr_re_siggenes	p=0.0002(n=33)	0.774733
fdr_nr_siggenes	p=0.0002(n=33)	0.785762
fig2B_nr	p=0.0191(n=33)	-0.501003
house_re_siggenes	p=0.0526(n=33)	0.41377
house_nr_siggenes	p=0.0838(n=33)	0.365642
ipres26	p=0.0071(n=33)	0.566176
ipres22	p=0.0142(n=33)	0.524064
ipres08	p=0.9104(n=33)	0.0317513
ipres06	p=0.1672(n=33)	0.299465
TCR_evenness	p=0.3021(n=33)	-0.233289
TCR_entropy	p=0.0406(n=33)	0.43516
BCR_evenness	p=0.2392(n=32)	-0.266496
BCR_entropy	p=0.0256(n=33)	0.475602

## Sheet: Table S24
Supplementary Table 24: Comparisons of prognostic values of different signatures using TCGA OV Affy dataset (564 samples)
for expression gene signatures, including "22 matrix genes", consensus clustering based on expression values was used to split groups and the survival analysis with overall survival was conducted subsequently using Cox Proportional Hazards Regression model
Both univariate and multivariate (also with age, tumour stage, grade and primary therapy outcome success) analyses were performed. HR and associated p-values were derived from the Cox regression model
			Univariate analysis		Multivariate analysis
signature	publication	PMID/PMCID	coxph P	HR (95% CI)	coxph P	HR (95% CI)
193 genes TCGA	TCGA Nature 2011	21720365	0.00335	1.437 (1.278 - 1.830)	0.15754	1.199 (0.932 - 1.544)
BC stroma genes Finak	Finak et al. Nat Med 2008	18438415	0.00569	1.607 (1.148 - 2.248)	0.5499	1.1146 (0.7810 - 1.5905)
263 genes Bonome	Bonome et al. Cancer Res 2008	18593951	0.00871	1.366 (1.082 - 1.724)	0.6598	1.056 (0.828 - 1.347)
Matrix index	NA	NA	0.0129	1.394 (1.073 - 1.811)	0.0332	1.3389 (1.0235 - 1.7515)
CD8 Palmer	Palmer et al. BMC Genomics 2006	PMC1479811	0.0222	1.307 (1.039 - 1.643)	0.288	1.137 (0.897 - 1.442)	high slightly better
22 matrix genes	NA	NA	0.0489	1.26 (1.001 - 1.586)	0.11349	1.2121 (0.9552 - 1.5381)
CD8 T cells Bindea	Bindea et al. Immunity 2013	24138885	0.0942	1.297 (0.956 - 1.759)	0.87494	1.025 (0.752 - 1.399)	high slightly better
88 genes Yoshihara	Yoshihara et al. Plos One 2010	20300634	0.107	1.209 (0.960 - 1.523)	0.90961	1.0142 (0.7952 - 1.293)
PDAC stroma genes Moffitt	Moffitt et al. Nat Genet 2015	26343385	0.232	1.151 (0.9143 - 1.448)	0.33737	1.1237 (0.8855 - 1.4259)
CD8 cluster Iglesia	Iglesia et al. Clin Cancer Res 2014	24916698	0.416	1.100 (0.874 - 1.386)	0.34155	1.1247 (0.8828 - 1.4327)	high slightly better
126 genes Yoshihara	Yoshihara et al. Clin Cancer Res 2012	22241791	0.659	1.053 (0.837 - 1.325)	0.7204	1.0443 (0.8283 - 1.3238)

[truncated: 1 more sheets: Table S25]
