# Supplementary material for: Deconstruction of a Metastatic Tumor Microenvironment Reveals a Common Matrix Response in Human Cancers
Source: Oxford University Press journal article supplement (doi:10.1158/2159-8290.cd-17-0284), 2017-12-01
Supplement: 21598290cd170284-sup-180566_3_supp_4416932_p04mfv.xlsx [file 21598290cd170284-sup-180566_3_supp_4416932_p04mfv.xlsx]

## Sheet: Table S1
Supplementary Table 1: Clinical annotation of samples analysed
Feature	Cohort (n = 36)
Median age, in years, at diagnosis (range)	63 (39-87)
High grade serous histology (% of cohort)	36 (100)
Figo stage
I/II	7
IIIA/B	3
IIIC	25
IV	1
Primary treatment
Surgery	18
NACT	18
Outcome of debulking surgery
No residue	26
>0 but <1 cm	3
> 1 cm	7

## Sheet: Table S2
Supplementary Table 2: MSD inflammatory cytokine and chemokine matrix
SAMPLE	IFNG	IL10	IL12A	IL13	IL1B	IL2	IL4	IL6	IL8	TNF	CSF2	IL12B	IL15	IL16	IL17A	IL1A	IL5	IL7	LTA	VEGFA	CCL11	CCL26	CXCL10	CCL2	CCL13	CCL22	CCL3	CCL4	CCL17
G35	1.05193	0.116605	0.407824	9.04287	2.13484	1.24939	0.0770917	151.943	13.0525	0.358956	0	0.00614051	3.02935	82.7545	0.942286	30.623	0	2.01006	0	35.9888	8.4806	8.77675	0.78505	258.347	7.06887	25.5363	63.8824	38.2835	5.35575
G42	0.55997	3.97683	0.127768	8.09576	4.16303	3.57986	0.0616441	99.2337	90.579	0.137754	0.491834	1.68617	13.4293	2371.9	0.2481	20.7262	0.69338	2.71012	0.83258	42.7516	5.11045	6.66133	1.82671	120.019	5.5537	17.1543	37.9864	78.2939	4.48434
G88	0.0804179	0.0925826	0.228174	4.02862	0.661708	1.01504	0.0519479	6.04664	3.44106	0.175355	0.342934	1.39067	12.7305	948.265	0.0745589	42.6278	0.29547	2.67417	0.569592	79.9242	5.04398	0.9518	1.24641	28.6755	2.59442	11.1818	3.11617	7.67693	4.37394
G45	0.55128	0.190877	0.0617622	12.8747	2.21898	2.53868	0.0519827	7.68152	4.13465	0.0731058	0.44036	2.04634	21.8343	4211.27	0.983016	35.0527	2.72901	5.69031	0.825992	170.911	9.00309	12.0387	1.60209	48.6433	6.88399	44.1407	13.6803	19.3263	5.98473
G93	1.35936	0.194446	0	3.3399	1.83341	2.47553	0	132.068	8.87234	0.108672	0.469897	0.86606	17.3991	2913.73	0.348552	46.3669	0.314788	5.37476	0.758302	22.5454	6.85804	3.448	3.19335	37.7936	3.23364	9.37229	3.44399	8.24779	3.00371
G94	0.152249	5.2846	0.0598901	8.89089	3.50841	2.17841	0.0702274	373.004	75.3096	0.0549509	0.310189	1.65012	8.87981	2813.02	0.310143	62.6809	0.550748	5.41095	0.32673	91.3687	8.50364	7.38567	35.4722	0	7.34396	16.3344	9.09771	34.897	5.58142
G72	0.240197	0.169075	0.10258	3.95512	0.469411	0.542245	0.00759063	10.9101	2.6465	0.0904992	0	0.551019	4.09545	1376.65	0.326639	13.1156	0.104878	1.2993	0.332709	27.4038	3.21009	2.34479	0.33665	4.04505	1.64471	4.26202	4.37352	10.2784	1.90129
G76	1.81746	0.121586	0.221929	6.58261	16.0711	4.34665	0.0863438	361.52	35.0159	0.231922	0.648121	0.646161	7.72466	6182.59	0.190446	37.72	0.508249	1.25361	0.355321	154.451	1.20385	1.58663	0.157943	85.3404	1.76966	4.00112	4.75714	21.7389	3.11414
G43	1.6502	1.80617	0.0653832	5.328	5.33091	0.473035	0.0643081	242.323	18.0127	0.120408	0.454732	0.628683	11.3065	1617.31	0.193981	22.6265	0	0.947955	0.270153	21.3605	2.78739	1.30125	0.517677	405.262	1.61032	8.32858	3.46984	3.24186	2.79288
G54	0.227914	1.52194	0.189473	21.159	65.902	0	2.061	1879.61	201.478	0.133509	3.96456	1.02014	17.6618	14148.5	0.542772	1032.03	0.425606	5.27415	0.950566	163.745	3.67658	3.82727	1.20925	0	2.67605	14.4785	4.94219	23.0368	3.8521
G69	1.62852	0.359487	0.231616	28.4075	13.1769	7.00365	0.22977	705.405	138.917	0.442276	0.419154	1.3201	13.6526	4628.16	1.00785	266.465	0.386438	3.21208	1.48164	210.063	4.75619	7.12648	6.67502	374.856	4.68096	20.0919	13.2897	14.3088	6.34782
G30	0.615623	0.211519	0.0805807	4.58637	1.55195	0.878284	0.031677	30.0972	7.29561	0.185575	0.633488	0.690558	15.1671	4109.71	0.294422	13.8592	0.286416	2.77508	0.619223	18.3984	2.00266	12.8915	2.38581	25.7483	3.07572	16.5521	9.73456	13.0874	2.817
G36	0.451058	0.709201	0.478504	11.8693	0.914315	2.85195	0.135961	71.7281	9.41677	0.424782	0	0.847154	6.97234	1402.98	0.851208	11.8942	0.804398	3.80214	1.66761	40.2676	7.74043	3.29177	0.626767	19.2481	5.68225	24.4443	11.7335	18.3291	11.2873
G57	0.0924784	0.248415	0.0567439	2.27483	0.774506	0.481463	0.022653	9.91	3.52728	0.0506893	0.322046	1.23603	11.0762	2872.52	0.089502	4.74442	0.615273	1.73005	0.452268	16.5501	2.57835	4.91758	0.301557	7.7283	1.73566	18.9359	1.87171	0.816274	1.78578
G92	0.114212	0.545346	0.063111	10.9792	1.4734	2.86486	0	138.997	13.6407	0.0617256	0.192787	0.769731	5.57663	2903.37	0.245939	31.6872	0	1.0503	0.425446	38.3042	2.42836	1.45776	0.0327292	6.67938	1.50854	8.38368	3.47507	0.373732	0.216573
G102	0.333838	0.0520213	0.0647312	3.71866	0.542167	0.623504	0.0120966	1.56508	2.32522	0.0731846	0.178675	1.15672	11.9936	4060.72	0.223611	8.546	0.0839652	0.814683	0.341817	10.5262	1.32629	2.25811	0.387761	4.60941	2.12625	13.2484	1.68326	1.09906	1.76858
G81	0.968333	3.15543	0.0355046	6.43	4.63981	2.40505	0.101572	377.281	87.5556	0.327772	0.163227	1.34054	4.06515	2619.34	0.366818	51.3765	0.146948	1.10433	0.246121	15.5164	2.76661	4.86276	0.957932	0	1.86434	14.6503	2.45574	9.98198	2.35737
G11	0.198616	0.755123	0.0760128	0.867549	1.44938	1.20367	0.0355648	213.74	12.6499	0.102506	0.148341	6.52274	5.58673	3247.18	0.118176	13.1619	0.0945967	1.19821	0.341838	20.1442	3.17839	2.4574	4.21729	43.6636	1.55307	10.868	2.67084	4.78869	2.1751
G124	0.921258	0.0745097	0.0939596	6.71001	11.0191	2.07128	0.0209201	3.96212	192.153	0.812463	3.7984	16.6942	16.2164	4790.78	0.235837	35.888	0.62576	3.79945	0.431368	385.867	17.232	82.7198	92.0802	70.8954	2.63365	14.0238	11.9211	16.8462	7.61564
G136	2.30011	0.265689	0.0833478	2.76349	5.0121	0.691236	0.0353876	7.66197	5.14261	0.50677	0.286149	10.538	44.5766	8760.04	3.73155	11.0641	0.730436	1.31936	4.62228	143.292	3.74716	24.1764	637.751	25.8786	2.42053	15.8227	4.40537	11.0985	8.20511
G138	1.06218	0.0256166	0.103003	4.71059	9.78216	1.35174	0.0317668	15.9685	26.9758	0.237133	0.433408	19.6563	11.9578	6308.14	0.270964	12.2248	0.785249	2.85889	0.684663	498.861	20.2051	20.3313	164.037	0	2.89822	18.7228	63.2026	102.159	10.6956
G15	0.779465	0.0373064	0.112705	2.42931	7.11653	0.289851	0.0103271	3.91101	20.6018	0.122726	0.37077	6.35593	5.96248	9216.42	0.220107	3.39852	0.571719	0.890335	0.598011	29.6125	1.85897	3.93981	10.3975	9.65806	1.25761	14.8757	10.0305	14.8222	1.65874
G17	0.465302	0.318147	0.0628723	3.96234	2.56477	0.178404	0.0281298	73.9817	9.50721	1.21132	0.283002	13.8995	6.68039	13279	0.265826	7.65207	0.260342	1.10989	0.424981	30.1693	1.51635	14.8303	14.3306	17.7201	1.88436	29.7409	1.87135	13.2932	4.3045
G75	1.07228	0.233088	0.112123	7.57035	5.14295	2.86062	0.042459	119.562	58.2319	0.283109	0.567153	11.3546	6.01952	14560.2	0.167038	20.2363	1.14048	1.16907	0.749539	57.666	2.41437	3.63696	3.85207	124.601	1.82354	17.5321	1.83896	6.30788	2.01416
G77	0.8469	0.302558	0.0831308	2.41599	5.94263	2.51585	0.0169677	18.1694	21.8875	0.248765	0.0903832	17.4625	4.76708	29469.9	0.466778	8.47798	1.0025	1.75651	0.660751	13.3272	3.48002	6.91571	4.8532	17.5265	1.46812	20.8246	3.60491	26.565	2.39739
G79	2.46664	0.536332	0.0985244	3.28824	1.24458	0.75995	0.0191091	1.11473	5.96861	0.218755	0.0591864	64.0639	4.93643	3486.09	0.232751	2.38265	0.743629	1.00357	0.794708	48.6779	31.6137	74.6247	579.902	37.3379	4.14515	38.1406	4.27491	15.6931	13.744
G33	1.74746	0.080136	0.0773496	1.07651	0.423204	0.374403	0.0113341	0.86153	1.18755	0.160802	0.310105	21.7118	7.05344	17917.5	0.321152	5.52848	0.668389	1.19831	1.05029	11.4562	3.00863	3.14469	8.28017	3.60347	2.191	24.3482	1.93168	14.0883	2.35334
G10	0.898956	3.38001	0.0604086	7.26023	4.23709	2.05819	0.148401	369.123	81.6292	0.227509	0.460975	1.79667	8.77125	2798.12	0.248962	45.3073	0.2253	1.28417	0.371718	17.2252	2.61243	5.43211	1.2154	503.464	2.08541	16.3281	2.50172	9.2635	3.34167
G29	0.138816	0.0392456	0.0631518	2.56836	2.43142	0.173151	0	0.691672	13.8038	0.15454	0.138183	2.25008	3.88916	14449.1	0.374104	7.48019	0.490048	1.15438	0.398384	9.05556	3.80687	4.6064	5.79083	8.84311	1.3284	23.3066	5.69643	27.4966	1.94176
G58	0.0137193	0.858908	0.0761126	2.27825	4.61614	1.12372	0.00999336	55.571	9.59469	0.0770215	0	2.65273	3.63115	4388.73	0.182799	3.0874	0.336543	0.999909	0.254908	19.2137	2.46107	5.0946	3.48546	12.6642	1.62519	14.6042	5.65959	10.2831	2.07069
G67	2.01814	0.113916	0.31472	7.14216	0.773696	3.09206	0.109552	2.32071	30.687	0.386695	0.88806	5.02377	28.0747	10810.8	0.838236	11.6539	47.7715	1.94812	4.14881	430.083	14.5132	28.4881	21.8628	9.03174	5.80713	322.094	13.4991	46.8915	8.85353
G85	0.164104	1.11742	0.0186814	3.00437	5.59798	10.9923	0.0775469	189.451	35.7786	0.198465	0.586829	0.629625	7.09549	4001.83	0.249901	23.108	0.376203	1.18388	0.326295	33.4487	1.79342	1.48593	0.212766	121.697	2.43018	7.0811	4.85195	10.1047	1.70909

## Sheet: Table S3
Supplementary Table 3: Matrisome proteomics matrix of intensity values and matrisome class annotation of identified proteins
ECM CLASS	ECM DIVISION	NAME	GENE.ID	n (number of unique peptides)	Protein Mascot Score	G35	G42	G94	G45	G88	G30	G43	G54	G93	G36	G69	G72	G76	G138	G136	G124	G82	G29	G58	G85	G92	G67	G102	G10	G81	G11	G15	G17	G33	G57	G75	G77	G79	Molecular Weight
Core matrisome	ECM Glycoproteins	Fibrillin-1 OS=Homo sapiens GN=FBN1 PE=1 SV=3	FBN1	153	5123.8	0.00102875	0.0664075	0.0349032	0.0095887	0.0138154	0.0442449	0.100542	0.0657183	0.0614293	0.031998	0.171557	0.0467702	0.0715767	0.0132425	0.0072355	0.00352778	0.00695046	0.0288555	0.130754	0.0167989	0.0260126	0.462314	0.0536625	0.0206741	0.03668	0.0774395	0.0249301	0.0208187	0.0110789	0.0248308	0.0132276	0.0335348	0.0143723	312236
		Myosin-9 OS=Homo sapiens GN=MYH9 PE=1 SV=4	MYH9	124	4607.6	0.000938234	0.00582683	0.00812982	0.025237	0.00137367	0.0053791	0.0084881	0.00622641	0.00647363	0.00142531	0.00518655	0.00980388	0.00674449	0.0204353	0.00833723	0.017176	0.0316555	0.00632701	0.00435217	0.00572102	0.00526881	0.00026992	0.00228624	0.00531382	0.00711569	0.00570678	0.0109711	0.0100699	0.00926925	0.00737861	0.00736528	0.00869538	0.0193631	226543
Core matrisome	ECM Glycoproteins	Fibronectin OS=Homo sapiens GN=FN1 PE=1 SV=4	FN1	134	3927.01	1.08645e-05	0.00565728	0.00288312	0.000668571	1.48664e-05	0.00853039	0.00417274	0.00215892	0.00332221	0.000224581	0.00150574	0.014666	0.0028535	0.0359884	0.00403989	0.0532733	0.053166	0.00794784	0.0117649	0.00944081	0.00765974	0.00563974	0.00398059	0.00638089	0.00606391	0.00658915	0.00603802	0.0115909	0.00678537	0.00488766	0.00497215	0.004885	0.0519549	262630
		Filamin-A OS=Homo sapiens GN=FLNA PE=1 SV=4	FLNA	126	3901.14	0.00118348	0.0134019	0.0191484	0.000777915	0.00121748	0.00293483	0.00461556	0.00641775	0.00748297	3.28615e-05	0.0015445	0.00627959	0.00652974	0.0154323	0.00607284	0.00898208	0.0159649	0.00447066	0.00466702	0.00545942	0.00596276	0.00042585	0.00539227	0.0034211	0.00659135	0.00610988	0.00681826	0.0067513	0.00647614	0.00894222	0.00453729	0.00735657	0.0146249	280748
		Plectin OS=Homo sapiens GN=PLEC PE=1 SV=3	PLEC	165	3834.9	0.000181708	0.000914869	0.00163182	0.00250324	0.0135309	0.00132318	0.00120262	0.00203321	0.00128284	0.000956675	0.000380735	0.00207297	0.00124742	0.0101145	0.00504438	0.00769635	0.00477065	0.00224962	0.000961042	0.00137557	0.0011851	0.000728035	0.0017696	0.00118056	0.00169142	0.00109699	0.00387565	0.00445443	0.00283789	0.00177829	0.00161339	0.00260597	0.0035555	531813
Core matrisome	Collagens	Collagen alpha-3(VI) chain OS=Homo sapiens GN=COL6A3 PE=1 SV=5	COL6A3	162	3536.1	0.00079474	0.0479301	0.0307276	0.0300773	0.00608144	0.0370527	0.055122	0.0438838	0.0511467	0.013946	0.0390022	0.0500123	0.0372348	0.0169769	0.0173831	0.0109873	0.0148869	0.024268	0.0361474	0.0317709	0.0488715	0.00265451	0.0383777	0.0524142	0.0592524	0.0347312	0.0373706	0.0301788	0.037498	0.0389714	0.034384	0.0271637	0.0214713	343689
		Neuroblast differentiation-associated protein AHNAK OS=Homo sapiens GN=AHNAK PE=1 SV=2	AHNAK	136	3098.97	0.00176443	0.00494762	0.00444524	0.00397078	0.000694665	0.00124272	0.00212619	0.000463235	0.00283093	0.0138528	0.00121875	0.00481776	0.000907355	0.00836435	0.00489724	0.00398637	0.00280965	0.00386327	0.00228409	0.00285664	0.00141785	0.00308938	0.0062604	0.00484446	0.00178048	0.00245183	0.00259436	0.00457112	0.00427836	0.00233988	0.0015428	0.0045894	0.00439496	629149
Core matrisome	Collagens	Collagen alpha-1(XII) chain OS=Homo sapiens GN=COL12A1 PE=1 SV=2	COL12A1	90	2674.19	0.00218305	0.00165624	0.000975048	0.00527735	0.00854484	0.0036071	0.00264905	0.00188745	0.0022774	0.00763285	0.00143991	0.000924464	0.0066538	0.00699048	0.00112711	0.00336559	0.00740752	0.00221017	0.00363041	0.000943363	0.00137194	0.000384747	0.000984674	0.00782197	0.00156909	0.00189696	0.00149339	0.00242696	0.00249844	0.00221381	0.000925405	0.00147696	0.0058271	333163
		Myosin-10 OS=Homo sapiens GN=MYH10 PE=1 SV=3	MYH10	79	2388.33	0.000177603	0.00138732	0.00271939	0.000450957	0.000243197	0.000977128	0.000571773	0.00104097	0.000887497	5.29756e-05	8.39559e-05	0.000791128	0.000822779	0.00722389	0.00176828	0.0041796	0.00562497	0.0021581	0.00087723	0.00145259	0.000769652	6.37113e-05	0.000588209	0.000688919	0.000739303	0.00101704	0.00428443	0.00404374	0.00199844	0.00213804	0.00117388	0.00268584	0.0049711	229010
		Myosin-11 OS=Homo sapiens GN=MYH11 PE=1 SV=3	MYH11	72	2316.26	0.000937413	0.00916394	0.0188306	0.000773738	0.000794262	0.00456028	0.00222208	0.0027647	0.0038948	0.0091717	0.000555304	0.00235473	0.00337827	0.00162829	0.00209638	0.00121503	0.0030842	0.00363338	0.00380812	0.00414911	0.00278956	0.000146203	0.00245257	0.000625557	0.00413506	0.00339375	0.00467446	0.00350572	0.00235713	0.00630626	0.00198398	0.00632691	0.00286847	227350
Core matrisome	Proteoglycans	Basement membrane-specific heparan sulfate proteoglycan core protein OS=Homo sapiens GN=HSPG2 PE=1 SV=4	HSPG2	128	2190.47	0.00155943	0.00988633	0.00922174	0.00841749	1.1736e-05	0.00777501	0.00906976	0.0103758	0.016092	0.00190854	0.0111903	0.0157706	0.014359	0.00296413	0.00253593	0.00454253	0.00510438	0.00142406	0.00415441	0.00466947	0.00941917	0.00453844	0.00812885	0.0145647	0.0149588	0.00597752	0.00310593	0.00339553	0.00314276	0.00866873	0.00437106	0.00319833	0.00470074	468836
		Desmoplakin OS=Homo sapiens GN=DSP PE=1 SV=3	DSP	51	2067.2	0	1.19912e-05	2.03165e-05	0.00139971	0.00144351	2.11591e-05	0.000252961	0.000118495	0.000157118	7.3662e-05	0.000566328	0.000152646	0.000222917	0.000521554	0.00384274	0.000456673	0.000324846	1.91785e-05	6.83288e-05	5.89121e-05	4.27191e-05	0.000154156	1.67831e-05	4.65746e-05	0.000597814	4.72093e-05	0.000117881	6.60048e-05	3.95664e-05	5.32098e-05	1.15576e-05	7.42337e-06	7.22035e-05	331792
		Serum albumin OS=Homo sapiens GN=ALB PE=1 SV=2	ALB	54	1789.82	0.00322511	0.00230962	0.01721	0.0382758	0	0.00153549	0.00532813	0.00117822	0.00214755	0.000469679	0.00491551	0.00864113	0.00248485	0.0271224	0.0184122	0.0183527	0.0192435	0.00744039	0.00669637	0.00608735	0.00343963	0.00425562	0.0189698	0.00277331	0.0111118	0.00529705	0.0050948	0.00583105	0.00425604	0.0021879	0.00631581	0.00856315	0.00253462	69367.7
Core matrisome	Collagens	Collagen alpha-1(XIV) chain OS=Homo sapiens GN=COL14A1 PE=1 SV=3	COL14A1	70	1779.38	0.000101423	0.00322575	0.00575404	0.000838579	8.27519e-05	0.0143475	0.00175297	0.00693736	0.00203988	0.000193259	0.00245241	0.00434966	0.00409792	0.00659992	0.00374085	0.000706468	0.00218016	0.0164605	0.0102059	0.0208967	0.0130117	0.00253321	0.00605099	0.0146023	0.00874013	0.00441376	0.0185636	0.0110054	0.0151729	0.0154407	0.0152862	0.0175225	0.00599094	193524
		Prelamin-A/C OS=Homo sapiens GN=LMNA PE=1 SV=1	LMNA	53	1751.19	0.000812987	0.00444018	0.00719642	0.00139948	0.000378554	0.00687592	0.00733856	0.00718441	0.0112933	0.0270609	0.00499941	0.0109642	0.0114235	0.0162143	0.0228571	0.0119576	0.00913032	0.00802664	0.00713227	0.0065947	0.00880384	0.000573952	0.00879457	0.010765	0.0119142	0.00830558	0.00896725	0.0172268	0.0129289	0.0154489	0.0113314	0.0151762	0.0110028	74141
		Vimentin OS=Homo sapiens GN=VIM PE=1 SV=4	VIM	59	1718.13	2.31473e-05	0.033073	0.0207726	0.000195854	0.00908558	0.0223825	0.0516738	0.0277443	0.0525544	0.0326967	0.0265905	0.0860901	0.0668746	0.056066	0.0273853	0.0325611	0.0271461	0.0427571	0.023689	0.0367489	0.0361127	0.00441272	0.0312391	0.0343643	0.0444309	0.031233	0.0436043	0.0450602	0.0586535	0.0495532	0.0412646	0.0375767	0.0278028	53652.6
Core matrisome	ECM Glycoproteins	Periostin OS=Homo sapiens GN=POSTN PE=1 SV=2	POSTN	49	1666.95	0.000228308	0.00521621	0.00381818	0.000173637	4.74546e-05	0.000702281	0.000873525	0.00170002	0.000329832	0.000282221	0.000121877	0.00133188	6.61289e-05	0.00321897	0.00168362	0.00214385	0.0107886	0.000863574	0.00413968	0.00198138	0.00243836	0.000126157	0.00406303	0.004501	0.000449623	0.00149771	0.00180913	0.00586183	0.00280184	0.00636575	0.000630854	0.00153587	0.00608539	93319.2
Core matrisome	ECM Glycoproteins	Laminin subunit gamma-1 OS=Homo sapiens GN=LAMC1 PE=1 SV=3	LAMC1	49	1630.5	0.000693628	0.00534495	0.00760258	0.00169188	0.000694009	0.00601107	0.0116831	0.00449646	0.0139055	0.00180915	0.00766253	0.019926	0.0110035	0.000896747	0.000904177	0.000725256	0.000563899	0.000673457	0.00546335	0.00292805	0.00680785	0.00101187	0.00699333	0.0027513	0.0108939	0.00482404	0.00140135	0.00126356	0.00144261	0.00503273	0.00243848	0.00197987	0.000666364	177605
		Spectrin alpha chain, non-erythrocytic 1 OS=Homo sapiens GN=SPTAN1 PE=1 SV=3	SPTAN1	82	1592.19	0.000884029	0.0012918	0.00113619	0.00468399	0.000178841	0.000616921	0.00351903	0.00126573	0.00276171	0.00100882	0.00103483	0.00677569	0.00428227	0.00169735	0.0024033	0.000949892	0.00088609	0.00110311	0.00158108	0.000937365	0.00220981	0.00151238	0.00245342	0.00190291	0.00381673	0.00147963	0.0015697	0.00157779	0.00178029	0.00251765	0.000946608	0.00131283	0.000599598	284539
		Keratin, type II cytoskeletal 8 OS=Homo sapiens GN=KRT8 PE=1 SV=7	KRT8	30	1534.01	0	0.000231406	0.000436159	0.000254731	0.000771008	0.00551115	0.00104964	0.00581898	0.00261321	2.00104e-05	0.000248685	0.00132132	0.000229874	0.00847659	0.0220798	0.00865488	0.00459141	7.37556e-05	0.000664768	0.000198724	0.00111519	0.00070162	0.00333268	0.00345865	0.00146345	0.000757461	0.00637642	0.00264175	0.000901683	0.00166731	0.000562881	0.00108979	0.00317265	53705.9
		Keratin, type I cytoskeletal 19 OS=Homo sapiens GN=KRT19 PE=1 SV=4	KRT19	21	1440.58	0	9.9123e-05	0.000250188	5.62658e-05	0.000157622	0.00151249	0.000174944	0.00149496	0.000877428	0.00021761	0.000118403	0.00026245	0.000140874	0.00353925	0.0142935	0.00385745	0.00145991	1.89128e-05	0.000107794	2.23164e-05	0.000430094	5.19534e-06	0.00120468	0.00106023	0.000250222	9.32618e-05	0.000741592	0.000869462	0.000259992	0.000246036	6.02133e-05	8.83426e-05	0.000452245	44106.6
Core matrisome	ECM Glycoproteins	Fibrinogen beta chain OS=Homo sapiens GN=FGB PE=1 SV=2	FGB	45	1392.4	0.00248204	0.000296667	0.0019383	0.000143341	8.21409e-06	0.00158584	0.018429	0.000335275	0.00196783	1.98018e-05	0.00570197	0.00215342	0.000796789	0.00190752	0.0102565	0.0299195	0.00462515	0.000801348	0.0046133	0.00440473	0.00587577	0.000345668	0.00285184	0.00090628	0.00216578	0.00651432	0.000881831	0.0062988	0.00228662	0.00204268	0.0190008	0.012576	0.00394383	55928.5
Core matrisome	ECM Glycoproteins	Tenascin OS=Homo sapiens GN=TNC PE=1 SV=3	TNC	38	1382.73	4.59535e-05	0.0011903	0.000310173	9.91499e-05	0.00400767	6.0761e-05	0.00128547	4.08397e-05	0.000203226	5.62702e-05	0.00228175	0.00089928	0.000227928	0.00111231	0.00193539	0.00131593	0.00327043	0.00133004	0.0015039	0.003726	0.000890542	0.000122548	0.000312015	0.0055463	8.27553e-05	9.9516e-05	0.000204498	0.000496962	0.00227107	0.000311068	9.52812e-05	0.000851674	0.00487064	240859
		Alpha-actinin-4 OS=Homo sapiens GN=ACTN4 PE=1 SV=2	ACTN4	42	1329.51	8.62388e-06	0.000937007	0.00193476	6.43047e-05	0.0178073	0.00102405	0.000489924	0.000443497	0.000538663	0.225264	0.000398833	0.000494364	0.000284732	0.0030114	0.00328119	0.00203542	0.00297961	0.000729551	0.000819757	0.000781868	0.000956156	0.00131472	0.000554242	4.53781e-05	0.000138578	0.00073457	0.00151925	0.00103795	0.00104498	0.000619692	0.000400285	0.0012845	0.000737668	104858
		Alpha-actinin-1 OS=Homo sapiens GN=ACTN1 PE=1 SV=2	ACTN1	29	1272.73	2.97255e-06	0.0004065	0.0013218	0.000940621	0	0.000218561	0.000144552	0.000132643	0.000164731	1.64757e-05	1.5065e-06	0.000200224	0.000118752	0.00249981	0.000683648	0.00102005	0.00149347	0.000358539	0.000275015	0.000224219	0.000292743	5.79509e-06	0.000437476	0.000109811	0.000116459	0.000280581	0.000873992	0.000689352	0.000502541	0.00018912	0.000113423	0.00102958	0.0006603	103061
		Complement C3 OS=Homo sapiens GN=C3 PE=1 SV=2	C3	55	1197.82	7.11998e-07	0.000710007	0.00312192	0.000184791	1.92512e-05	0.00124129	0.00565096	0.00118576	0.0012146	0.00054037	0.00116168	0.00191051	0.000552262	0.0019798	0.00108044	0.00367311	0.00190795	0.00296857	0.00241338	0.00290864	0.00146114	0.000156709	0.0029293	0.00076202	0.00297318	0.00184811	0.00102829	0.00114166	0.00105984	0.00093778	0.000869396	0.00138438	0.00110453	187157
		60 kDa heat shock protein, mitochondrial OS=Homo sapiens GN=HSPD1 PE=1 SV=2	HSPD1	34	1191.9	3.27016e-06	6.27207e-05	0.000620086	0.000222241	0.00301524	0.000139469	0.000541087	0.00016905	0.000225512	0	3.13105e-05	4.51372e-05	0.000111966	0.00264913	0.00548672	0.00310665	0.00168405	0.000176951	0.000146483	0.000176207	0.00013534	2.25989e-06	0.000477799	0.00019805	6.19227e-05	0.000225875	0.000593809	0.00045591	0.000433444	0.000207739	0.000120751	0.000265207	0.000610953	61057.3
		Lactotransferrin OS=Homo sapiens GN=LTF PE=1 SV=6	LTF	34	1170	0.00240606	0.000170699	0.00137567	0.000252352	0.00786831	9.43604e-05	0.00274836	0.00805436	0.000666197	0	0.00561128	0.00129514	0.0144936	4.1139e-05	0.00057454	0.000517709	5.95381e-05	0.000112138	0.0021137	0.000881926	0.00341817	1.77773e-05	0.000564464	2.30036e-05	0.00454654	7.83153e-05	8.22275e-05	0.000458593	0.000113245	0.000998815	0.00302257	0.000331749	8.20065e-05	78183.5
		ATP synthase subunit alpha, mitochondrial OS=Homo sapiens GN=ATP5A1 PE=1 SV=1	ATP5A1	27	1165.73	3.07164e-05	0.000802101	0.00255378	0.00035567	8.04306e-06	0.00166197	0.00305883	0.00255055	0.00276591	0.000410492	0.00119469	0.00383141	0.00135837	0.00234888	0.0101347	0.00207399	0.00264157	0.00177526	0.00139432	0.00136223	0.00189981	3.41955e-05	0.00405365	0.00223237	0.00292491	0.000918102	0.00204986	0.00231257	0.00278857	0.00227402	0.00130716	0.00205542	0.00183275	59753.2
Core matrisome	Collagens	Collagen alpha-1(VI) chain OS=Homo sapiens GN=COL6A1 PE=1 SV=3	COL6A1	42	1159.41	3.45312e-05	0.015713	0.00578776	0.00759381	0.00180672	0.00529923	0.00737312	0.00921855	0.00551635	4.21043e-05	0.00395812	0.00619644	0.0055869	0.00473692	0.00505639	0.00253801	0.00292476	0.00334034	0.00830778	0.00651357	0.013703	6.35887e-05	0.00682143	0.00980335	0.00571427	0.0054075	0.0103752	0.00535505	0.00779782	0.00398437	0.00468354	0.00474273	0.00285722	108533
		Lamin-B1 OS=Homo sapiens GN=LMNB1 PE=1 SV=2	LMNB1	27	1129.62	9.00123e-05	0.000114011	0.000240114	4.44334e-06	0	0.000132232	0.000126262	0.000337434	0.000261702	0.000144839	5.01086e-05	0.00033663	0.000261337	0.0013609	0.004504	0.00186577	0.00164247	0.00071356	0.000401178	0.000393113	0.000392997	1.76813e-05	0.000295992	0.000241113	0.000374492	0.000205374	0.000809524	0.00228847	0.00121425	0.00108546	0.000804737	0.00270841	0.00106316	66409.7
		Ras GTPase-activating-like protein IQGAP1 OS=Homo sapiens GN=IQGAP1 PE=1 SV=1	IQGAP1	37	1119.15	0.00075858	7.36427e-05	0.000419868	2.98904e-05	0	0.00037632	0.000380158	5.79999e-05	0.000460705	0.000110994	0.000621877	0.000157487	7.42732e-05	0.000976799	0.00118991	0.000923137	0.00122495	0.000685665	0.000164883	0.000191536	0.000126788	5.50297e-05	0.000265417	0.000167445	0.000192024	0.000148146	0.00055802	0.000511209	0.000638117	0.000118293	0.000238841	0.000713788	0.000256143	189263
Core matrisome	Collagens	Collagen alpha-1(I) chain OS=Homo sapiens GN=COL1A1 PE=1 SV=5	COL1A1	44	1107.56	0.454242	0.302109	0.104303	0.276635	0.471522	0.118602	0.0130706	0.0806962	0.0518946	0.130733	0.0705204	0.0104879	0.0629573	0.0222005	0.0157911	0.00913003	0.0130226	0.131948	0.0882539	0.102857	0.112953	0.214898	0.0891776	0.144551	0.0458443	0.0816117	0.105777	0.0945249	0.0932069	0.0956073	0.0857121	0.0591779	0.0562375	138943
Core matrisome	ECM Glycoproteins	Thrombospondin-1 OS=Homo sapiens GN=THBS1 PE=1 SV=2	THBS1	25	1093.02	2.74088e-06	7.35704e-05	4.48833e-05	0.000204303	0	2.39776e-05	0.000117915	5.56979e-05	8.08792e-05	7.13683e-05	4.46562e-05	0.00050786	1.48561e-05	0.00376532	3.76538e-05	0.000913723	0.00114211	6.01909e-05	7.51886e-05	8.30099e-05	0.000156242	4.68913e-05	7.93819e-05	3.476e-05	0.000120627	0.000115891	0.000165695	0.000261739	1.75078e-05	8.9957e-05	7.11327e-05	3.43617e-05	0.000510481	129384
		Actin, cytoplasmic 2 OS=Homo sapiens GN=ACTG1 PE=1 SV=1	ACTG1	19	1088.89	3.04992e-06	0.0212312	0.047824	0.000228319	0	0.0149127	0.0161234	0.0203475	0.023527	0.00313699	0.00521726	0.0305147	0.0167073	0.0445098	0.0182151	0.0290592	0.0638263	0.024376	0.0124112	0.0166836	0.0174588	0.0021607	0.0209632	0.0115531	0.0134112	0.0189677	0.0118212	0.0135597	0.0199576	0.036452	0.0173188	0.0349525	0.0613498	41793.3
		Leucine-rich PPR motif-containing protein, mitochondrial OS=Homo sapiens GN=LRPPRC PE=1 SV=3	LRPPRC	31	1087.3	0.000112558	4.94294e-05	7.73439e-05	0.0187468	0	3.84928e-05	7.97399e-05	0.000743504	2.53851e-05	0.000149916	4.21816e-05	2.17101e-05	2.42814e-05	0.000242323	0.00146009	0.0005895	0.000557675	2.80721e-05	5.28605e-05	3.33704e-05	0.000117535	1.94092e-05	0.000118451	7.06539e-05	2.94967e-05	5.51126e-05	8.03164e-05	0.000106852	0.000115192	0.00033845	3.0459e-06	6.17727e-05	2.00718e-05	157915
		Spectrin beta chain, non-erythrocytic 1 OS=Homo sapiens GN=SPTBN1 PE=1 SV=2	SPTBN1	52	1079.25	7.37637e-06	0.0019204	0.00163662	0.000376242	2.62578e-05	0.000833747	0.00293448	0.00119442	0.00268727	0.000115904	0.00190118	0.00655036	0.00443918	0.00106109	0.00126057	0.000486248	0.00108809	0.0029474	0.00184196	0.00236701	0.0028346	0.000509956	0.00270945	0.000891371	0.00341356	0.00194454	0.00256021	0.00207025	0.0023394	0.00240455	0.00211591	0.00169572	0.00141697	274621
		ATP synthase subunit beta, mitochondrial OS=Homo sapiens GN=ATP5B PE=1 SV=3	ATP5B	30	1068.95	0.0177268	0.000357919	0.00181952	0.000228241	0	0.000655095	0.00180679	0.00106399	0.0013165	0.000662356	0.000536479	0.00147935	0.000902512	0.00349763	0.0121476	0.00335171	0.00381003	0.00111599	0.000727864	0.00108031	0.00143029	1.34289e-05	0.00200469	0.00081716	0.00111338	0.000691742	0.00200623	0.00208478	0.00260505	0.00136775	0.00111169	0.00188606	0.00132823	56561.6
		DNA-dependent protein kinase catalytic subunit OS=Homo sapiens GN=PRKDC PE=1 SV=3	PRKDC	33	1067.61	2.73783e-06	0.0016911	8.70773e-05	0.000155758	0	0.00011848	0.000553664	0.000235974	0.000368803	0.194603	1.55141e-05	0.00049424	0.000227218	0.000283223	0.000854285	0.000603857	0.000943127	0.000110156	0.000149132	8.52814e-05	0.000132477	0.000227524	0.000477292	3.30531e-05	0.00042173	0.000173243	0.000277429	0.000424153	0.000298263	0.000233782	0.00011619	0.000246972	0.00028237	469120
		Keratin, type II cytoskeletal 7 OS=Homo sapiens GN=KRT7 PE=1 SV=5	KRT7	18	1062.99	2.78669e-07	0.000378502	0.000301704	3.06236e-05	2.64654e-05	0.000242658	7.92178e-05	0.000141702	0.000281341	1.68611e-05	0.000790955	0.000122966	0.000194729	0.00388695	0.00871584	0.00367678	0.000230572	2.70366e-05	0.000467975	0.000119585	0.000118985	0.00012068	0.000849971	0.000239305	0.000239064	9.51498e-05	0.00040462	0.000607382	0.000294177	0.000100335	1.19531e-05	0.000184011	0.000328421	51387
Core matrisome	ECM Glycoproteins	Fibrinogen alpha chain OS=Homo sapiens GN=FGA PE=1 SV=2	FGA	38	1062.69	3.22452e-05	0.000151601	0.00157201	7.16853e-05	0.000442698	0.0008205	0.0173609	0.00103436	0.00340973	0.00102984	0.00634725	0.0033635	0.00191356	0.00167651	0.00918074	0.0181365	0.00438994	0.000319688	0.0101112	0.0056396	0.00764367	0.000312803	0.00389706	0.00040959	0.00493265	0.00534799	0.000451331	0.00567361	0.00176078	0.00138164	0.0155041	0.00823239	0.00655602	94974.2
		Tubulin beta chain OS=Homo sapiens GN=TUBB PE=1 SV=2	TUBB	5	1062.23	0	0.000402313	0.000933892	0	0	0.00147889	0.000526357	0.00155375	0.000240775	0	7.23186e-05	0.000791779	0.000245358	0.00191126	0.00200056	0.00197852	0.00196443	0.0015898	0.000315477	0.000771753	0.000980663	2.5752e-05	0.00064081	0.00136652	0.000125494	0.000594765	0.00202655	0.00127884	0.00127598	0.00102346	0.000654345	0.00129455	0.00111647	49670.8
		Talin-1 OS=Homo sapiens GN=TLN1 PE=1 SV=3	TLN1	52	1055.71	8.73588e-06	0.000599212	0.00175371	0.000200849	0	0.000162249	0.000829247	0.000110759	0.000820445	0.00115462	9.45772e-05	0.000707899	0.000219776	0.00128113	0.00114963	0.00129262	0.000982509	0.000500969	0.000700111	0.000743513	0.000757294	0.000107287	0.000649787	0.000311261	0.000689791	0.000603323	0.000846741	0.000762242	0.000777666	0.000274286	0.000146375	0.000732134	0.000357114	34960.9
Core matrisome	ECM Glycoproteins	Fibrinogen gamma chain OS=Homo sapiens GN=FGG PE=1 SV=3	FGG	34	1030.57	0.00252637	0.000236492	0.00308382	0.000230479	0.000242192	0.0033617	0.0315202	0.00167379	0.00463339	0.00184517	0.0108972	0.00621144	0.0036933	0.00207208	0.00982211	0.0343241	0.00594818	0.00139309	0.0104457	0.00553538	0.0137579	0.00435483	0.0061107	0.0016287	0.0111127	0.013127	0.00120507	0.0110273	0.00352438	0.00588839	0.0313714	0.0174478	0.00601068	51512.4
Core matrisome	ECM Glycoproteins	Laminin subunit beta-2 OS=Homo sapiens GN=LAMB2 PE=1 SV=2	LAMB2	42	1024.01	7.23251e-05	0.00207749	0.0027692	0.00036714	0.000665301	0.00243007	0.00277233	0.000929735	0.00271225	0.000948926	0.00214138	0.00627999	0.00297746	0.00081136	0.00158961	0.00110336	0.00105724	0.00031494	0.00198013	0.00116442	0.00240396	0.00015855	0.0023612	0.000751241	0.00362407	0.00151649	0.000870512	0.000848055	0.000766299	0.00208504	0.000764924	0.00126954	0.000250734	195981
		Nuclear mitotic apparatus protein 1 OS=Homo sapiens GN=NUMA1 PE=1 SV=2	NUMA1	29	1012.84	0.000133333	1.09563e-05	4.47009e-05	8.09355e-05	7.67235e-06	4.44983e-05	3.48494e-05	1.59356e-05	5.44097e-05	3.04802e-05	1.74638e-06	0.00093118	0.000102233	0.000269198	0.000655409	0.000133316	0.000637194	5.22607e-05	1.7994e-05	1.84645e-05	1.90605e-05	2.23954e-06	9.29703e-06	6.35781e-06	1.71641e-05	6.38649e-05	0.000163567	0.00017824	0.000112235	2.71665e-05	4.14029e-05	3.4511e-05	6.94701e-05	238265
		Myoferlin OS=Homo sapiens GN=MYOF PE=1 SV=1	MYOF	27	1005.08	1.42446e-05	8.5136e-06	6.25242e-05	0.000221542	0	6.1343e-05	0.000159042	4.13192e-05	0.00018797	0.000505861	0.000131741	6.61214e-05	0.000230889	0.000773489	0.000762364	0.000645523	0.000887515	0.000419794	5.89775e-05	6.79954e-05	0.000186605	0.0001956	0.000264057	0.000523157	5.9873e-05	1.41721e-05	0.000184566	0.000305445	0.000320374	0.000145131	0.000165797	0.000130202	0.000225955	234723
		Glyceraldehyde-3-phosphate dehydrogenase OS=Homo sapiens GN=GAPDH PE=1 SV=3	GAPDH	29	1004.32	3.39305e-05	0.00217774	0.00284808	0.00939201	0	0.00469097	0.00454475	0.00597241	0.00717357	2.88406e-05	0.000990155	0.00484503	0.00351514	0.00995619	0.0192809	0.00662879	0.0464072	0.00718048	0.00266843	0.00569104	0.00437082	0.000624314	0.00566107	0.00638202	0.00715106	0.00699406	0.0149845	0.00737056	0.00866444	0.0097136	0.00572643	0.00914729	0.00875947	36053.4
		Clathrin heavy chain 1 OS=Homo sapiens GN=CLTC PE=1 SV=5	CLTC	29	994.09	2.5044e-06	4.96579e-05	0.000143056	5.31179e-05	1.46286e-05	1.47413e-05	7.76158e-05	6.53292e-05	7.88286e-05	3.47155e-06	1.15435e-05	0.00012379	5.53663e-05	0.00118154	0.00107489	0.00102283	0.000884285	0.000182797	0.000107159	3.54097e-05	4.10855e-05	0.000220719	6.24509e-05	0.000317719	3.63355e-05	4.67591e-05	0.000300419	0.00039028	0.000197919	4.08357e-06	1.96726e-05	0.00013722	5.89539e-05	191625
Core matrisome	ECM Glycoproteins	Laminin subunit alpha-4 OS=Homo sapiens GN=LAMA4 PE=1 SV=4	LAMA4	27	991.407	0	0.00104013	0.00126409	2.55151e-05	0.0011482	0.000979171	0.00350119	0.00236195	0.00462508	6.06936e-05	0.00386941	0.00613764	0.0037413	0.000276695	8.82137e-05	0.000189821	0.000192212	0.000201984	0.00182679	0.000897013	0.00278516	0.0281631	0.00248494	0.000954004	0.00549869	0.00178403	0.000299319	0.000335731	0.000256658	0.00151233	0.000494634	0.000304188	0.000142891	202533
Matrisome-associated	ECM-affiliated Proteins	Annexin A2 OS=Homo sapiens GN=ANXA2 PE=1 SV=2	ANXA2	9	974.507	3.66782e-06	0.000558756	0.000930451	0.00633802	5.75964e-05	0.00181747	0.00227632	0.00203101	0.00260167	0	0.000330334	0.00106172	0.00131758	0.00344042	0.00147411	0.00222976	0.00245363	0.00315453	0.00191112	0.00231635	0.00198435	2.09364e-05	0.00375378	0.00234167	0.00404361	0.00153731	0.00218704	0.00438688	0.00188083	0.00222617	0.0014553	0.00172558	0.00149284	38605.4
Core matrisome	ECM Glycoproteins	Laminin subunit beta-1 OS=Homo sapiens GN=LAMB1 PE=1 SV=2	LAMB1	31	968.62	1.35932e-05	0.00182048	0.00153257	4.91618e-05	0.00122393	0.000640147	0.00453434	0.00206675	0.00547097	0.000134333	0.00293233	0.00614717	0.00320633	0.000426189	0.000221224	0.000300621	0.00039258	0.000156249	0.00191869	0.0140296	0.0023338	0.000211537	0.00260644	0.00088576	0.00399035	0.00168881	0.000181908	0.000315014	0.00103442	0.001956	0.000682855	0.000314818	0.00034629	198041
		Actin, gamma-enteric smooth muscle OS=Homo sapiens GN=ACTG2 PE=1 SV=1	ACTG2	9	964.13	0	0.00126518	0.00333027	0.000255764	0	2.22807e-05	4.99936e-05	0.00132939	0.0002017	0	2.69293e-05	0.000380556	0.00103347	0.00130596	0.000961348	0.000714857	0.00177374	0.000586387	0.000767701	0.00047651	0.000522635	3.88873e-06	0.000798895	0.000105059	8.93085e-07	0.00134231	0.00144825	0.00120725	0.000618108	0.0026199	0.000326087	0.0011631	0.000956727	41877.4
		Alpha-enolase OS=Homo sapiens GN=ENO1 PE=1 SV=2	ENO1	24	963.74	0	0.000297782	0.00146011	0.000963269	0	0.00224084	0.000159855	0.000293528	0.00028398	6.1423e-05	0.000530233	4.26682e-05	0.000306109	0.00518852	0.00325096	0.00378796	0.00125795	0.014006	0.000193809	0.000217594	0.00104616	0.0152375	0.000189469	3.68859e-05	6.98323e-05	0.00784874	0.00922887	0.0099732	0.00373294	5.27785e-05	9.7836e-05	0.000414022	0.000121201	47170.3
		Actin, alpha skeletal muscle OS=Homo sapiens GN=ACTA1 PE=1 SV=1	ACTA1	17	957.9	1.61864e-06	0.025669	0.0554889	2.6609e-05	0.00378784	0.0114545	0.00861944	0.00643192	0.0133674	2.31928e-05	0.000444914	0.00498934	0.00704953	0.0225326	0.0116582	0.011943	0.0119333	0.00615252	0.00854782	0.00586007	0.00506634	3.03803e-05	0.00799818	0.000912821	0.00551477	0.00799635	0.00985171	0.00429838	0.0049917	0.0115907	0.00344715	0.0106948	0.00974392	42051.6
		Pyruvate kinase isozymes M1/M2 OS=Homo sapiens GN=PKM PE=1 SV=4	PKM	30	952.69	0.000112632	0.000375998	0.00127047	0.000140583	1.15868e-05	0.0011107	0.000832221	0.000945646	0.000911433	4.81174e-05	0.000537478	0.00106345	0.000956097	0.0047975	0.00173425	0.00350151	0.00607498	0.00166652	0.000755464	0.00165458	0.00056973	6.45781e-05	0.00113116	0.00353175	0.00102606	0.00060538	0.00234466	0.00374392	0.00149385	0.0012427	0.000454212	0.00169474	0.00548829	57938.4
Core matrisome	ECM Glycoproteins	EMILIN-1 OS=Homo sapiens GN=EMILIN1 PE=1 SV=2	EMILIN1	33	947.391	0.000390904	0.000896161	0.00157932	0.000210715	0	0.00347508	0.00224019	0.00451781	0.00324107	0.000663892	0.00171443	0.00278671	0.00184384	0.000889385	0.00106155	0.00135329	0.00222805	0.00242642	0.00207058	0.00286261	0.00189539	0.00986987	0.00126621	0.00148137	0.00715682	0.00476216	0.00233214	0.00263257	0.00149782	0.00233477	0.00244139	0.00276268	0.00380831	106669
Core matrisome	ECM Glycoproteins	Fibulin-1 OS=Homo sapiens GN=FBLN1 PE=1 SV=4	FBLN1	19	934.24	0.00153142	1.03453e-06	7.87922e-05	0.000290677	0	1.74239e-05	5.19055e-05	2.06965e-06	5.55444e-06	6.27178e-06	5.20339e-06	0.000141244	4.42331e-05	0.00431898	0.000146864	0.002294	0.000951157	0.000717489	2.60645e-05	0.000286672	1.44658e-05	0.0011925	3.88048e-05	0.00010524	0.000303169	0.000107044	0.000332606	0.000975447	0.000185095	7.32776e-05	0.00013941	0.000338093	0.00127085	77212.6
		Tubulin beta-2B chain OS=Homo sapiens GN=TUBB2B PE=1 SV=1	TUBB2B	7	933.14	0.000392784	9.60044e-06	0.000668515	1.12146e-05	0	0.000601374	0.00103992	0.000911198	0.00149267	0	0.000256473	0.00159495	3.22795e-06	0.000887356	0.000926826	0.000965816	0.000963671	0.000676273	0.000271599	0.000539152	0.000725854	0	0.000557585	2.1087e-05	0.000975935	0.000752961	0.000741106	0.000699433	0.000625668	0.000555439	0.000624792	0.000593837	0.00117316	49953.1
		Keratin, type I cytoskeletal 18 OS=Homo sapiens GN=KRT18 PE=1 SV=2	KRT18	25	928.847	3.45453e-06	3.1723e-05	0.000138712	0.00017012	0	0.000547459	8.21842e-05	0.000744791	0.000310245	0	7.66296e-05	0.000140054	5.82745e-05	0.00417767	0.00793715	0.00399707	0.00145664	2.24431e-05	0.000111032	9.06922e-05	0.000307373	5.94164e-05	0.000332506	7.56852e-05	0.000156128	5.90517e-05	0.00277123	0.000822739	0.000179009	0.000207096	0.000106934	0.000234378	0.00105186	48058.7
		Cytoskeleton-associated protein 4 OS=Homo sapiens GN=CKAP4 PE=1 SV=2	CKAP4	27	912.33	0.000124949	1.23979e-05	9.25975e-05	0.0015199	1.27217e-05	0.000687968	0.000158495	0.00038377	0.000303101	0.000135026	6.65545e-05	0.000260446	0.000280395	0.00113864	0.00106664	0.00207695	0.00199878	0.00037458	0.000105334	0.000461198	0.000283297	0.000122999	0.000254381	0.00107211	0.0003552	0.000185474	0.000573001	0.000895305	0.00106573	0.0010581	0.000619678	0.000826226	0.00249491	66023.1
		Tubulin beta-4B chain OS=Homo sapiens GN=TUBB4B PE=1 SV=1	TUBB4B	1	881.92	0	7.68615e-05	0.000160551	0	0	0.000104872	0.000186034	9.70129e-05	0.000317516	0	6.86715e-05	0.000125082	9.60597e-05	0.000141442	9.64255e-05	0.000146244	0.000123716	6.13932e-05	3.39113e-05	2.81021e-05	5.2785e-05	0	0.000105078	0.000128389	0.000149708	0.000100321	7.44695e-05	5.1807e-05	8.24984e-05	6.17862e-05	4.78435e-05	5.76008e-05	8.03554e-05	49830.9
		Heat shock 70 kDa protein 1A/1B OS=Homo sapiens GN=HSPA1A PE=1 SV=5	HSPA1A	10	859.45	0.000220185	0.00182165	0.000531311	2.3165e-05	0	0.000287219	0.000162222	0.000165388	0.000126618	0	0.00123295	0.000192063	5.52598e-05	0.0010052	0.00099543	0.000423545	0.000490261	0.00023114	4.88899e-05	0.000330037	0.000126708	1.18406e-05	0.000254045	1.74843e-05	0.000204881	0.000341336	5.43686e-05	0.000449436	0.000277822	0.000334658	0.000379195	0.000337118	0.000355417	70055
Core matrisome	ECM Glycoproteins	EGF-containing fibulin-like extracellular matrix protein 1 OS=Homo sapiens GN=EFEMP1 PE=1 SV=2	EFEMP1	24	852.22	0.000339947	0.000132371	9.61868e-05	0.00281078	3.37797e-05	0.000572108	6.68901e-05	7.0894e-05	0.000124427	2.34256e-05	5.79957e-06	0.000849176	0.000207613	0.000931734	0.000631936	0.000366748	0.000807822	0.000127092	6.69946e-05	0.151383	0.000151668	0.000398526	0.000274979	0.000273866	0.000103811	4.53231e-05	0.000232828	0.00016512	0.00103297	4.25751e-05	9.09737e-05	0.000402405	0.000722508	54639.3
Core matrisome	Proteoglycans	Prolargin OS=Homo sapiens GN=PRELP PE=1 SV=1	PRELP	25	847.85	8.44241e-05	0.00275148	0.00348805	0.000171339	0	0.00525109	0.00567481	0.00775339	0.00592541	9.30888e-05	0.00465358	0.0051325	0.00786028	0.00761246	0.00299305	0.000384883	0.000560785	0.00227046	0.00465992	0.00239758	0.00388203	0.0013927	0.00670611	0.000860888	0.008848	0.00423973	0.00200484	0.00303755	0.00197326	0.00463915	0.00285197	0.0023052	0.00320945	43811.5
		Elongation factor 2 OS=Homo sapiens GN=EEF2 PE=1 SV=4	EEF2	31	845.85	9.84638e-06	7.61322e-05	0.00027038	6.76907e-05	2.68874e-05	0.000231342	0.000279714	0.00053132	0.000622261	0.000620848	0.000149053	0.000227829	0.00018078	0.000690924	0.00121867	0.000985078	0.00132339	0.000291163	7.53571e-05	0.000214545	0.00019213	1.57435e-05	0.000250282	0.000161599	0.000374669	0.000260391	0.00058258	0.000466777	0.000509808	0.000294192	0.000346641	0.00050534	0.000855924	95342.4
		Perilipin-4 OS=Homo sapiens GN=PLIN4 PE=2 SV=2	PLIN4	25	838.499	0.000316478	0.000661415	0.00105588	0.00387896	0.000152461	1.79772e-05	0.000663315	1.70416e-05	0.000405523	0.0020227	0.000289654	0.00122398	3.73217e-05	0.000760611	0.00108838	0.000964792	0.0010538	0.000141569	6.61302e-05	5.32807e-05	0.000120133	3.51008e-05	0.000307257	1.97354e-05	0.000254195	7.0259e-05	0.000475874	0.000420393	0.000545054	4.07393e-05	6.25309e-05	0.000382159	0.000204571	134433
Core matrisome	Collagens	Collagen alpha-2(VI) chain OS=Homo sapiens GN=COL6A2 PE=1 SV=4	COL6A2	35	822.67	2.72872e-05	0.0119362	0.00514396	0.000895278	0.00292508	0.00456938	0.0192488	0.017326	0.0196014	1.77565e-05	0.00961225	0.0220205	0.0143995	0.00370642	0.00479875	0.00284858	0.00276357	0.00213652	0.00911334	0.00710341	0.0135763	0.000310019	0.00993543	0.0114065	0.0201174	0.00442692	0.00593111	0.00496111	0.00737658	0.0123263	0.00858968	0.00512307	0.00539168	108582
		Phosphoglycerate kinase 1 OS=Homo sapiens GN=PGK1 PE=1 SV=3	PGK1	23	809.54	0	0.000464081	0.00127909	0.000556274	7.47205e-06	0.000107631	1.41473e-05	7.6495e-05	9.16005e-05	2.34004e-05	1.08195e-05	0.000171595	6.05118e-05	0.00262971	0.00100022	0.00276476	0.00215534	0.000420219	0.000191337	0.00040164	0.000232042	6.39024e-06	0.000716386	0.00020086	0.000303948	4.08956e-05	0.000651066	0.00100933	0.00040311	0.000291597	9.06666e-05	0.000946744	0.00124264	44615.8
		Tubulin beta-4A chain OS=Homo sapiens GN=TUBB4A PE=1 SV=2	TUBB4A	6	778.28	0	5.89318e-05	8.9104e-05	0	0	0.000139447	7.53914e-05	0.000100738	0.00021073	3.16423e-05	0	1.78376e-06	1.94071e-05	0.00130666	0.00135527	0.000986808	0.00177538	0.000135021	0.000117865	0.000167631	8.19452e-05	0	4.17955e-05	6.32849e-05	2.20984e-06	7.81962e-05	0.00104368	0.000612546	0.000498508	3.0045e-05	3.05415e-05	0.00019761	9.38092e-05	49585.7
		Heat shock cognate 71 kDa protein OS=Homo sapiens GN=HSPA8 PE=1 SV=1	HSPA8	14	768.4	2.89295e-05	0.000192215	0.000708966	0.00155849	0	8.20187e-05	0.000136989	0.000116259	0.000109963	0.00420796	3.08279e-05	0.000480538	3.69185e-05	0.00149767	0.00109583	0.001303	0.00121228	0.000427278	0.000125609	0.0001755	0.000188899	1.73481e-06	0.000272986	0.000193889	0.000127333	0.000141599	0.000413729	0.000374598	0.000440158	0.000342917	0.000260577	0.000518731	0.000928375	70900.8
		Stress-70 protein, mitochondrial OS=Homo sapiens GN=HSPA9 PE=1 SV=2	HSPA9	21	760.56	8.45722e-06	0.000467163	0.00106835	0.000153836	0.0563174	0.000285167	0.000625809	0.00016346	0.00048294	0.000270504	0.000113165	0.000223806	0.00013687	0.000755928	0.0027292	0.000995573	0.000675752	6.60153e-05	5.29216e-05	4.549e-05	9.51177e-05	5.92925e-05	0.000353469	0.000406157	0.000341885	0.000203495	0.00018355	0.000168815	0.000116254	0.000200738	0.000167451	0.000141731	0.000179279	73682.7
		Filamin-B OS=Homo sapiens GN=FLNB PE=1 SV=2	FLNB	32	756.9	2.79569e-05	0.000131185	0.00165763	0.00417317	4.64605e-05	0.00286619	0.00540309	0.00228866	0.00366534	2.13804e-05	5.09611e-05	0.000388138	3.695e-05	0.00156282	0.00130127	0.000855806	0.000933713	0.00014008	0.00350168	0.000802257	0.000900712	6.99088e-05	0.00154272	0.00267678	5.80027e-05	0.00369673	0.000399653	0.000338293	0.000735809	0.00169234	0.000617677	0.00112127	0.00114206	278176
Core matrisome	ECM Glycoproteins	Transforming growth factor-beta-induced protein ig-h3 OS=Homo sapiens GN=TGFBI PE=1 SV=1	TGFBI	27	723.51	6.8207e-06	0.000801775	0.0004059	5.99431e-05	1.94668e-05	0.000781153	0.00128922	0.00161965	0.000828819	3.94509e-07	0.000720444	0.000286037	0.00108964	0.00115814	0.000436987	0.00123211	0.00281863	0.000683541	0.00110651	0.00106771	0.00105105	7.60371e-06	0.00085239	0.00165525	0.000443538	0.000538987	0.000812141	0.000870389	0.000859366	0.000675217	0.000388337	0.000760098	0.00221197	74683.9
		Tubulin beta-3 chain OS=Homo sapiens GN=TUBB3 PE=1 SV=2	TUBB3	14	713.34	0	0.000859138	0.000741838	0.000289994	0	0.000746044	0.00138504	0.000644564	0.00237941	0.00125618	1.55243e-06	0.000774843	0.000353817	0.00291137	0.00236918	0.00180777	0.00375599	0.000950267	0.000443078	0.000729818	0.000888104	0	0.00100021	0.0012702	5.55722e-06	0.000446982	0.00218794	0.00156345	0.00162565	0.000710118	0.000439741	0.000993701	0.000866687	50432.8
Core matrisome	Collagens	Collagen alpha-2(I) chain OS=Homo sapiens GN=COL1A2 PE=1 SV=7	COL1A2	20	703.79	0.000151481	0.0519136	0.102047	2.73836e-05	0.0284755	0.181319	0.0174346	0.0861268	0.0422627	0.000950364	0.132729	0.00992702	0.081545	0.02581	0.0160319	0.0135667	0.0190237	0.143712	0.0814996	0.0721429	0.13104	0.00334095	0.049933	0.186953	0.0434463	0.119795	0.124985	0.110557	0.0633893	0.134894	0.132955	0.089421	0.0851986	129316
		78 kDa glucose-regulated protein OS=Homo sapiens GN=HSPA5 PE=1 SV=2	HSPA5	20	699.2	8.63186e-07	6.10463e-05	0.000506466	2.12496e-05	0.000369556	0.000723473	0.000478069	0.000939917	0.000549776	9.00362e-06	7.25325e-05	0.000783695	0.000415456	0.00142184	0.00170168	0.00170818	0.00317486	0.000810758	0.000472608	0.000722707	0.000656216	8.46907e-05	0.00108856	0.0001473	0.000361037	0.000517727	0.000736122	0.000906631	0.000628569	0.000833545	0.00061422	0.000671776	0.00133924	72335.9
Retired	n/a	Putative annexin A2-like protein OS=Homo sapiens GN=ANXA2P2 PE=5 SV=2	ANXA2P2	20	691.827	3.95383e-06	0.00200568	0.00460915	0.00162686	0	0.00629563	0.0129402	0.00986616	0.0133425	0.00515062	0.00266896	0.0207245	0.00999539	0.0130319	0.0063682	0.00900238	0.00680422	0.0094803	0.00933615	0.0110898	0.00748854	0.000285467	0.0106672	0.00525326	0.0210001	0.00847916	0.00728614	0.0139761	0.00813558	0.0105024	0.00737829	0.00643834	0.0078109	38660.3
		Endoplasmin OS=Homo sapiens GN=HSP90B1 PE=1 SV=1	HSP90B1	26	690.88	0	0.000272475	0.000781496	0.0250552	0	0.000435364	0.000956023	0.000746919	0.000829761	1.35148e-05	6.78764e-05	0.000621775	0.000210391	0.00177539	0.00237844	0.00177531	0.00129157	0.000766402	0.0004256	0.00044752	0.000501069	3.82268e-05	0.000900622	0.000466669	0.000499999	0.00072216	0.00076679	0.000597845	0.000708945	0.000657476	0.000519618	0.000504805	0.00104886	92472.8
		Protein disulfide-isomerase A3 OS=Homo sapiens GN=PDIA3 PE=1 SV=4	PDIA3	22	686.51	3.37381e-06	0.000125582	0.000649875	0	0	0.00124833	0.00255484	0.00167073	0.0018431	4.68884e-05	0.000425258	0.00130759	0.00124968	0.00223474	0.00183642	0.00165736	0.00448887	0.00157632	0.000528675	0.00134207	0.00106537	0	0.00153326	0.000337021	0.00183054	0.00155925	0.000991977	0.000808908	0.00169768	0.00326222	0.00235061	0.00119691	0.0026576	56784.4
Core matrisome	Proteoglycans	Lumican OS=Homo sapiens GN=LUM PE=1 SV=2	LUM	20	681.06	0	0.01608	0.0105926	2.94527e-05	0	0.0267478	0.0200721	0.0366254	0.0230787	0.00117987	0.00911658	0.0161325	0.016097	0.0160937	0.00532917	0.00260459	0.0069621	0.012887	0.0276806	0.013378	0.0176766	0.000511441	0.0256439	0.0280637	0.0318292	0.021239	0.0118204	0.0102749	0.00895543	0.0241773	0.0152126	0.0114016	0.0120094	38430.5
		Tubulin alpha-1C chain OS=Homo sapiens GN=TUBA1C PE=1 SV=1	TUBA1C	3	681.06	0	0.000137701	0.00013854	6.49395e-05	0	5.16594e-05	0.000312191	6.4202e-06	0.000520644	0	0	5.89552e-06	0	0.00108971	0.00109916	0.000840325	0.00104488	0.00013923	8.98488e-05	9.61995e-05	0.000110851	0	3.27525e-05	0.000573023	1.12596e-05	1.46408e-05	0.000481716	0.00023377	0.000417853	1.8369e-06	5.31655e-07	0.000116753	5.16675e-05	49895.6
		Vinculin OS=Homo sapiens GN=VCL PE=1 SV=4	VCL	29	677.107	0.00119547	0.000500813	0.00184896	0.000128945	0	0.000364179	0.00288032	0.000706361	0.0025375	0.003408	0.000399308	0.00374871	0.00107564	0.000763201	0.000479092	0.000439863	0.000658444	0.000864614	0.000827213	0.000431671	0.00110048	0.000427534	0.00219092	0.000467108	0.00199126	0.000817212	0.00120822	0.000722381	0.00106173	0.000858869	0.000456368	0.000949926	0.000572893	123804
		Apolipoprotein B-100 OS=Homo sapiens GN=APOB PE=1 SV=2	APOB	30	667.72	5.0936e-07	2.05658e-05	0.000298214	8.77088e-05	0	0.000725821	0.000319576	4.06646e-06	0.00012673	2.59248e-05	8.22891e-05	0.000555348	2.81396e-05	1.89368e-05	0.000308075	0.000261186	0.000197578	0.000440866	0.000857163	0.000132045	0.000471835	3.29086e-06	0.000855274	3.22488e-05	0.000165769	0.000213874	5.06967e-05	0.000169576	0.000223518	5.23697e-05	7.26989e-05	0.000123753	8.80873e-06	515642
		Myeloperoxidase OS=Homo sapiens GN=MPO PE=1 SV=1	MPO	21	660.46	1.09766e-05	2.54154e-06	0.000148777	3.04186e-06	2.38179e-05	1.04569e-05	0.00118162	0.00345181	0.000332198	7.90476e-06	0.00715498	0.000466405	0.00803631	7.64372e-06	2.77499e-05	5.14226e-05	6.27469e-05	6.88636e-06	0.00183138	0.000339282	0.00157548	0.000318166	0.00017011	0.000100155	0.00513694	3.242e-05	1.43127e-05	0.000191262	1.79191e-05	0.000387142	0.00112656	5.01155e-05	4.06266e-05	83871.9
Core matrisome	ECM Glycoproteins	Cartilage intermediate layer protein 1 OS=Homo sapiens GN=CILP PE=1 SV=4	CILP	15	655.9	1.78599e-06	2.33117e-06	3.47967e-05	8.23974e-05	0.00103082	1.02749e-05	5.81679e-05	1.65803e-05	1.17842e-05	8.7328e-05	1.42698e-05	2.18006e-06	3.96107e-06	5.95606e-05	8.43798e-06	1.15045e-05	0.000578842	2.98316e-05	3.17194e-06	0.00010762	3.20207e-05	0	3.3195e-05	6.9534e-06	4.58574e-06	1.23796e-06	3.45532e-05	4.99926e-05	2.97968e-05	1.98094e-06	1.58516e-05	3.62386e-05	0.000230746	132568
		Heterogeneous nuclear ribonucleoprotein K OS=Homo sapiens GN=HNRNPK PE=1 SV=1	HNRNPK	16	650.49	1.94805e-06	4.75841e-05	0.00022622	1.65468e-05	7.5953e-06	7.92753e-05	0.000160852	2.94837e-05	4.89535e-05	2.3682e-06	0.000101433	3.94673e-05	0.000296538	0.00123836	0.00202684	0.0011064	0.000653528	0.00018405	2.47871e-05	8.8787e-05	4.64934e-05	4.74523e-06	3.15222e-05	0.000914926	0.000158907	0.00013814	0.000506224	0.000310955	0.00041579	2.58526e-05	0.000124273	0.000220675	0.000220728	50977.6
Core matrisome	Proteoglycans	Biglycan OS=Homo sapiens GN=BGN PE=1 SV=2	BGN	19	648.97	3.50835e-06	0.00234273	0.00282516	0.000729856	0	0.00673143	0.00129139	0.00385355	0.00292907	5.78189e-06	0.00170557	0.00247885	0.00377196	0.00332677	0.00216983	0.00125413	0.0038	0.00131131	0.000793844	0.00167835	0.00146778	3.53605e-05	0.00292047	0.00847688	0.00479701	0.00290627	0.00169425	0.00551587	0.00344873	0.00333554	0.00190747	0.0033268	0.00642004	41655.4
		Calnexin OS=Homo sapiens GN=CANX PE=1 SV=2	CANX	18	648.6	0.000153316	7.99879e-05	0.000292825	5.85658e-06	5.95314e-05	0.000144829	0.000168165	0.000283668	9.17799e-05	0.000190165	7.24743e-05	0.000449041	0.000200895	0.00109183	0.00190695	0.00133228	0.000829036	0.000601433	0.000262783	0.000313318	0.00027632	2.16548e-05	0.000334291	0.00021087	0.000101519	0.00021696	0.000717704	0.000642216	0.000302922	0.000242887	0.000143934	0.000322885	0.000150431	67570.1
Matrisome-associated	ECM Regulators	Serpin H1 OS=Homo sapiens GN=SERPINH1 PE=1 SV=2	SERPINH1	21	642.7	2.02204e-05	7.04976e-05	0.000118729	0.000521553	2.64573e-06	0.000517294	0.000532733	0.000391839	0.000878144	0	0.000144151	0.000361242	6.45721e-05	0.00314641	0.00214433	0.00514469	0.00558196	0.000682381	0.000202067	0.0012751	0.000603195	2.43476e-05	0.000246939	0.00159155	0.000520455	0.00082283	0.00114763	0.00222551	0.00184853	0.000372523	0.000549926	0.00158838	0.00332414	46441.8
		Lamin-B2 OS=Homo sapiens GN=LMNB2 PE=1 SV=3	LMNB2	22	639.32	2.70183e-06	0.000263651	0.000548597	0.000210862	5.27762e-05	0.000265733	0.00022532	0.000230339	0.000631651	7.01336e-06	0.00087804	0.000736363	0.000646266	0.00207305	0.00253292	0.00129523	0.000588006	0.000500888	0.000266184	0.000278352	0.000302725	1.68479e-05	0.00042254	0.000214179	0.00088186	0.00031774	0.000545686	0.000776464	0.000773064	0.000710402	0.000668398	0.000988695	0.000842755	67690.2
		Catenin alpha-1 OS=Homo sapiens GN=CTNNA1 PE=1 SV=1	CTNNA1	17	636.35	3.71399e-05	1.42349e-05	2.07623e-05	0.000505047	0	4.66323e-05	9.16534e-05	2.45173e-05	0.000134515	0	8.28297e-05	6.42619e-05	2.11034e-06	0.000224452	0.000836393	0.000250618	0.000394997	2.24334e-05	1.52461e-05	0.000404692	3.53105e-05	8.35399e-07	8.20296e-05	7.3606e-05	5.23043e-05	3.81363e-05	0.00014657	0.000150214	7.18075e-05	2.95317e-05	0.000133009	3.66173e-05	4.45431e-05	100075
		Tubulin alpha-3E chain OS=Homo sapiens GN=TUBA3E PE=1 SV=2	TUBA3E	3	630.31	1.34533e-05	0.000521688	0.000792083	0	0	0.000506565	0.000802164	0.00117431	0.0014267	4.26602e-06	0.000519391	0.00138895	0.000733777	0.0011528	0.00108836	0.00137032	0.00121327	0.000744179	0.00030796	0.000514243	0.000602927	0	0.000788114	0.00094866	0.00111721	0.00057765	0.00115102	0.000822311	0.000920775	0.00092424	0.000532008	0.000677456	0.0014653	49858.8
		Poly [ADP-ribose] polymerase 1 OS=Homo sapiens GN=PARP1 PE=1 SV=4	PARP1	20	625.054	4.72017e-06	2.6636e-06	6.34785e-05	5.58044e-06	0	1.22408e-05	8.56351e-06	9.39816e-06	4.55234e-05	0	1.32502e-05	2.48639e-05	2.71836e-06	0.000209229	0.00138401	0.000363312	0.000815633	2.17445e-05	1.05008e-05	1.24908e-05	4.92016e-06	0	2.81499e-05	9.05799e-06	2.23772e-05	5.83822e-05	0.000135269	9.63635e-05	0.000155176	1.52934e-05	1.94094e-05	0.000122683	9.86605e-05	113090
Core matrisome	ECM Glycoproteins	Fibulin-2 OS=Homo sapiens GN=FBLN2 PE=1 SV=2	FBLN2	15	619.447	0	6.77205e-05	0.000224727	1.98981e-05	0.000841856	6.58711e-05	0.000135151	0.000117325	0.000230249	3.15538e-07	4.74958e-05	0.000201988	6.18567e-05	0.000641792	0.000170826	0.000183934	0.00128128	0.000630899	0.000119653	0.000298067	0.000402759	0.00035768	8.84214e-05	0.000129465	0.000159887	0.000213618	0.000400584	0.000438444	0.000682208	0.000133295	0.000111901	0.000360766	0.00045167	126571
		Fructose-bisphosphate aldolase A OS=Homo sapiens GN=ALDOA PE=1 SV=2	ALDOA	17	617.13	8.96301e-06	0.000540712	0.00121453	0.000238438	0.00366472	0.00135197	0.00216155	0.00240014	0.00369678	4.14879e-06	0.00207993	0.00394602	0.00400928	0.00125365	0.00202115	0.00156935	0.00132295	0.00132677	0.00137878	0.00158011	0.00293253	7.95999e-05	0.00318174	0.00228663	0.00390188	0.00157362	0.00140221	0.000573241	0.00149929	0.00252458	0.00170929	0.00151362	0.00155594	39420.2
		Gelsolin OS=Homo sapiens GN=GSN PE=1 SV=1	GSN	25	608.53	0	0.000603648	0.00107546	7.91448e-05	0	0.000342906	0.000308904	0.000298815	0.000367306	7.54617e-05	0.000162745	0.000653478	0.000415636	0.00271757	0.00121353	0.00157234	0.00242298	0.00152459	0.000340061	0.0009215	0.000365225	6.36241e-05	0.000510482	0.000245324	0.000860378	0.000289744	0.00210434	0.00174375	0.00123114	0.000453625	0.00037219	0.00115764	0.001074	85699.6
		Voltage-dependent anion-selective channel protein 1 OS=Homo sapiens GN=VDAC1 PE=1 SV=2	VDAC1	14	607.02	6.24349e-07	5.47971e-05	0.000300852	0.000108891	0	7.7031e-05	0.000776712	0.000541208	0.000905629	3.99748e-06	0.000252356	0.000523506	0.000306806	0.000830232	0.00263633	0.000958957	0.00165354	0.000236385	0.000292747	0.000260308	0.000431649	0	0.000764707	0.000434523	0.000325994	0.000270411	0.000293205	0.000234822	0.000579019	0.000508417	0.000301707	0.000595118	0.000545902	30772.8
		Nucleolar protein 56 OS=Homo sapiens GN=NOP56 PE=1 SV=4	NOP56	17	601.19	1.43579e-05	0	2.08948e-05	2.01676e-05	0	1.3402e-06	1.74522e-05	2.21525e-05	3.38603e-05	0	0.00123269	9.30056e-06	5.32165e-05	0.000266928	0.00111317	0.000297015	0.000427348	3.49526e-05	5.75352e-06	1.11468e-05	1.5164e-07	8.20733e-05	1.0496e-05	0.000132723	0.00181148	6.20943e-06	5.79074e-05	0.000146826	0.000113866	2.23446e-05	3.59781e-05	0.000131904	6.55592e-05	66052.4
		Ig gamma-1 chain C region OS=Homo sapiens GN=IGHG1 PE=1 SV=1	IGHG1	10	595.15	1.77666e-06	0.00117278	0.00149602	1.29691e-05	0	0.00126442	0.00903707	0.000509866	0.00155095	0.00032386	0.00424048	0.00744527	0.000341396	0.00446761	0.00237094	0.006455	0.00529408	0.0140002	0.00440862	0.0059145	0.00180439	0.000801315	0.00378496	0.00594991	0.00922292	0.00533069	0.0157144	0.00439315	0.00726681	0.00249194	0.00374703	0.00579749	0.00678534	36105.2
Matrisome-associated	ECM Regulators	Alpha-1-antitrypsin OS=Homo sapiens GN=SERPINA1 PE=1 SV=3	SERPINA1	20	593.06	0	0.000291366	0.00121478	0.00183197	0	2.86973e-05	0.00019347	4.06273e-05	0.000148151	1.02217e-05	0	0.000171594	2.51396e-05	0.00359375	0.000596789	0.00350919	0.000449535	0.000748261	0.000269434	0.00049468	0.000199506	0	0.000445244	2.22055e-05	0.000304483	0.000258343	0.000316229	0.000197464	0.000134326	0.000126522	0.00015406	0.000264541	0.00019708	46737.8
		Trifunctional enzyme subunit alpha, mitochondrial OS=Homo sapiens GN=HADHA PE=1 SV=2	HADHA	29	586.11	7.19084e-05	0.000248992	0.0014222	0.00017894	0	0.00172329	0.00217302	0.000759184	0.00252619	2.87108e-05	0.000705515	0.00162835	0.000506337	0.00100214	0.00231131	0.00150016	0.00136405	0.000891565	0.000375944	0.000570083	0.00103186	1.0208e-05	0.00185095	0.00106974	0.000754817	0.000337335	0.00119166	0.00119399	0.00130327	0.00047197	0.000520527	0.000826121	0.000612403	83004
		Heat shock protein HSP 90-beta OS=Homo sapiens GN=HSP90AB1 PE=1 SV=4	HSP90AB1	9	584.201	3.8685e-06	4.99519e-05	0.000129416	0.000603169	0	4.16432e-06	1.50812e-05	8.78977e-05	3.58364e-06	0	4.88168e-06	3.87643e-06	0	0.000495523	0.000350784	0.000735707	0.000215639	2.14858e-05	5.99796e-06	4.90478e-06	1.00593e-05	9.76688e-07	1.59442e-05	5.52773e-06	2.68345e-06	3.76446e-06	4.3209e-05	4.37694e-05	1.9873e-05	5.54579e-06	2.41867e-06	2.16459e-05	3.29939e-06	83267.9
Matrisome-associated	ECM-affiliated Proteins	Annexin A6 OS=Homo sapiens GN=ANXA6 PE=1 SV=3	ANXA6	33	582.317	2.34439e-05	8.20532e-05	0.000404191	0.000740761	4.15664e-05	1.06084e-05	0.000104699	0.000193384	0.000104358	4.65887e-05	5.8825e-05	0.000242326	9.82159e-05	0.00171232	0.000703607	0.00150787	0.000442017	0.000439915	0.000242392	0.0010688	0.000205165	9.57838e-05	0.000225519	5.42485e-05	0.000183019	7.94407e-05	0.000395872	0.00136583	0.000659879	7.47032e-05	8.21997e-05	0.000244122	0.000245135	75877.2
		Fatty acid synthase OS=Homo sapiens GN=FASN PE=1 SV=3	FASN	21	578.254	2.90614e-06	0.000341682	0.00156881	2.09914e-05	0	0.000482046	0.00054139	0.000494534	0.00212491	0.000281786	0.000536839	0.000150288	0.000633839	0.000102233	0.000310985	0.000193888	5.60473e-05	8.22939e-05	3.69767e-05	7.79235e-05	0.000252469	3.60431e-06	0.000444811	0.000104624	0.000101453	3.23458e-05	2.07602e-05	0.000288621	0.000248283	0.000119659	0.00011238	0.000111354	1.67061e-05	273440
		Prohibitin OS=Homo sapiens GN=PHB PE=1 SV=1	PHB	14	576.72	0.000554484	0.00011711	0.000319328	0	0	5.42043e-05	0.000180902	0.000112842	9.53493e-05	0.000454215	2.80014e-05	7.84576e-05	8.33765e-05	0.000719591	0.003454	0.000916516	0.000463302	0.00027191	0.000239346	0.000144183	0.000242583	4.353e-07	0.000206473	4.67286e-05	3.83848e-05	0.000108726	0.000411429	0.000364576	0.000492084	8.12898e-05	0.00012627	0.000405759	0.000336404	29804.3
		Nucleolar protein 58 OS=Homo sapiens GN=NOP58 PE=1 SV=1	NOP58	12	575.26	4.92509e-06	4.64209e-06	2.12852e-05	0.000307509	3.69789e-05	9.79087e-06	2.01804e-06	2.2504e-05	3.364e-06	0.000703706	1.96458e-05	1.53873e-05	8.41624e-06	0.000198922	0.000724842	0.0001973	0.000198342	3.81304e-05	1.25371e-05	2.23329e-05	2.29523e-05	3.55529e-05	2.56007e-05	1.89767e-05	8.6078e-08	6.18203e-06	4.34621e-05	0.000137422	6.26424e-05	3.57148e-06	4.90785e-07	8.08881e-05	0.000137034	59580.4
		T-complex protein 1 subunit beta OS=Homo sapiens GN=CCT2 PE=1 SV=4	CCT2	20	568.927	5.59311e-07	6.23931e-05	9.13684e-05	9.86552e-05	0	1.25294e-05	7.11781e-05	4.2633e-05	8.90812e-05	0	2.56015e-05	0.000177233	4.44253e-05	0.000405248	0.000914569	0.000311457	0.00053075	0.000168753	5.66076e-05	7.19018e-05	9.5571e-05	0	0.000177007	4.26039e-05	0.00014414	0.000112376	0.000317244	0.000219867	0.000171563	0.000113406	9.5872e-05	0.000163104	0.000119547	57490.3
Core matrisome	Proteoglycans	Decorin OS=Homo sapiens GN=DCN PE=1 SV=1	DCN	18	568.89	0.000419598	0.0115751	0.00956715	1.0177e-05	0	0.00934036	0.0113313	0.0193501	0.0189632	0.00374676	0.0133049	0.0263549	0.0242482	0.00458071	0.00280092	0.00187744	0.00247415	0.0162088	0.00655764	0.0101541	0.0187841	9.65521e-05	0.0245359	0.00672381	0.0431573	0.0129401	0.0144599	0.0106187	0.0121613	0.0221054	0.0245795	0.0127173	0.0156847	39747.8
		X-ray repair cross-complementing protein 6 OS=Homo sapiens GN=XRCC6 PE=1 SV=2	XRCC6	18	559.32	1.56503e-06	1.61514e-05	0.000109107	0.000606124	0	0.000181251	6.74777e-05	0.000186582	0.000146372	0.000133044	7.8253e-06	0.000193445	7.02072e-05	0.00025406	0.00126535	0.000543792	0.00062955	0.00022737	6.67567e-05	0.000141729	0.000153135	0	0.000188918	1.09876e-06	4.64705e-05	0.000232394	0.00041401	0.000454311	0.000413952	0.00022368	0.000163746	0.000341577	0.000159691	69846.6
		Hemoglobin subunit beta OS=Homo sapiens GN=HBB PE=1 SV=2	HBB	11	557.14	0.000547624	0.00859944	0.0355235	0.020571	0	0.0101689	0.0271912	0.00789981	0.0111843	0.000823894	0.00826986	0.0502893	0.0333494	0.00631849	0.0185066	0.0580413	0.00517139	0.00329261	0.0416372	0.0128085	0.0226651	0.00105871	0.032365	0.00962504	0.0533797	0.0217911	0.0170953	0.0246243	0.0233151	0.0477447	0.074243	0.0218577	0.0344889	45121.6
Matrisome-associated	ECM-affiliated Proteins	Annexin A1 OS=Homo sapiens GN=ANXA1 PE=1 SV=2	ANXA1	17	557.06	1.68654e-06	0.000144022	0.00101202	0.000861391	3.0964e-06	0.0003719	0.000685336	0.000524415	0.00070103	0.000192531	0.000307311	0.0013864	0.000871933	0.00235711	0.00214519	0.00232215	0.000929382	0.00256214	0.000596973	0.00189841	0.000317094	1.19032e-05	0.000597441	0.00118149	0.00108458	0.000353785	0.00146396	0.00378702	0.00114321	0.000746174	0.000998971	0.00132701	0.000546804	38715.2
Core matrisome	Proteoglycans	Mimecan OS=Homo sapiens GN=OGN PE=1 SV=1	OGN	15	555.92	0	0.00450486	0.00625041	5.61566e-05	0	0.0107138	0.010296	0.0155547	0.0108811	0	0.00322716	0.00166176	0.0151339	0.000772955	0.0014119	0.000155651	0.000299928	0.00212798	0.0104505	0.00304812	0.00884835	1.91282e-05	0.0156896	0.0106911	0.0242289	0.00975069	0.00411493	0.00205986	0.00264856	0.0122285	0.00517294	0.0052397	0.00292899	33923.7
		Triosephosphate isomerase OS=Homo sapiens GN=TPI1 PE=1 SV=3	TPI1	12	551.77	0	2.81283e-05	0.000805608	1.72106e-05	0.00510978	7.76802e-06	0	4.93087e-05	4.98912e-06	1.93162e-05	0.000675288	2.99799e-06	3.03941e-05	0.00240076	0.000896074	0.00172768	0.00022696	1.46785e-05	4.86618e-05	4.23305e-06	4.26295e-05	0	4.57328e-05	4.95812e-06	6.49144e-06	4.33019e-05	4.1112e-05	4.46307e-05	2.63964e-05	0.000220668	2.06126e-05	2.81097e-05	4.26744e-05	30790.4
		Splicing factor, proline- and glutamine-rich OS=Homo sapiens GN=SFPQ PE=1 SV=2	SFPQ	15	538.217	0	1.24862e-05	3.42251e-05	2.49804e-05	2.1145e-05	4.42235e-05	5.3978e-05	4.71907e-05	0.000111702	3.79062e-05	2.90815e-05	0.000105415	1.2778e-05	0.000416724	0.0013113	0.00045067	0.000764214	8.54363e-05	3.9301e-05	3.07648e-05	4.9321e-05	6.33673e-06	6.42117e-05	8.05998e-05	8.75986e-05	3.1459e-05	0.000119408	0.000215242	0.00022194	8.113e-05	5.26336e-05	0.000219408	0.000176362	76149.3
Core matrisome	ECM Glycoproteins	Adipocyte enhancer-binding protein 1 OS=Homo sapiens GN=AEBP1 PE=1 SV=1	AEBP1	14	536.497	0	1.41967e-05	3.99297e-05	0.000273337	1.85566e-06	2.09417e-05	0.000122059	1.1319e-05	0.000193103	4.94644e-05	0	7.13387e-05	1.36083e-05	0.000735967	5.54592e-05	0.000570319	0.000251	0.000256183	5.18189e-06	0.0001358	2.14658e-05	2.35166e-05	0.000107857	5.30495e-05	6.27433e-05	0.000282182	9.69635e-05	0.000120219	0.00014246	5.19068e-05	3.65892e-05	0.000149191	0.00130475	130932
		Heterogeneous nuclear ribonucleoprotein M OS=Homo sapiens GN=HNRNPM PE=1 SV=3	HNRNPM	24	536.087	6.89454e-06	0.000202453	3.13172e-05	0.00123627	0.00114264	0.000469678	4.09225e-05	3.58423e-05	0.00012475	0.00015588	4.58516e-05	1.4272e-05	7.54635e-06	0.000765767	0.00132697	0.000413332	0.000820311	0.00011086	1.59234e-05	0.00347482	4.85794e-06	0.00013162	2.69591e-05	4.9241e-05	3.49009e-06	0.00480249	0.000208304	0.000209587	0.000167755	3.36752e-05	2.15042e-05	0.000145716	0.000141383	77517.8
		Keratin, type I cytoskeletal 10 OS=Homo sapiens GN=KRT10 PE=1 SV=6	KRT10	16	535.75	0.000214692	0.000659505	0.000607256	0.000150674	1.82104e-05	0.000669731	0.000589227	0.000522323	0.00054393	8.52509e-06	0.00381748	0.000586957	0.000376774	0.000207202	0.000199556	0.000302419	0.000336018	0.000265066	0.000410885	0.000168185	0.000577217	0.00101479	0.000320447	0.000616481	0.000629317	0.000334885	0.00014356	0.000183993	0.000487963	0.00029323	0.000414461	0.000149132	0.000327831	58827.9
		Tropomyosin beta chain OS=Homo sapiens GN=TPM2 PE=1 SV=1	TPM2	11	533.9	0.00127333	0.00290455	0.0046656	0	9.1663e-05	0.0021777	0.0016071	0.00136501	0.00251075	0.0126182	0.000240867	0.000480273	0.000851205	0.00149815	0.000663874	0.00052417	0.00129049	0.000571376	0.00321217	0.000904185	0.000930997	0.000147446	0.0017516	0.000544587	0.000861216	0.00298074	0.000811613	0.000619178	0.000514746	0.00111093	0.000426435	0.000837025	0.00129258	32850.6
		Tropomyosin alpha-4 chain OS=Homo sapiens GN=TPM4 PE=1 SV=3	TPM4	8	533.657	0	0.00172533	0.00177904	0.000111754	1.79316e-05	0.00246948	0.0015053	0.00216885	0.00239214	0.0196347	0.000191095	0.00053432	0.00103144	0.00177326	0.00100619	0.00102291	0.00119255	0.000843923	0.0033369	0.000835699	0.00172782	0.000265986	0.00180566	0.000614264	0.00117852	0.00712665	0.00111687	0.00107771	0.00080864	0.00134894	0.000603796	0.00095368	0.00127828	28521.2
		Cytoplasmic dynein 1 heavy chain 1 OS=Homo sapiens GN=DYNC1H1 PE=1 SV=5	DYNC1H1	25	533.16	3.11037e-06	6.25496e-05	8.55579e-05	4.42599e-05	0	0.000205318	0.000170748	0.000125383	0.000407514	0	0.000402484	0.000389449	8.92352e-05	0.000281471	0.000257734	0.00032173	0.00042742	0.000197979	0.000114907	8.7216e-05	0.000146667	0.000246857	5.70393e-05	0.00128497	0.000185893	7.85273e-05	0.000341023	0.000281841	0.000334035	0.000413444	6.06197e-05	0.000116195	0.000136609	532439
		Malate dehydrogenase, mitochondrial OS=Homo sapiens GN=MDH2 PE=1 SV=3	MDH2	16	527.047	0	4.74269e-05	0.000433233	0	0	0.000966654	0.000675387	0.000174744	0.000434295	5.93589e-06	3.15029e-05	0.000871884	2.03178e-05	0.00193626	0.00344728	0.00198862	0.00164436	0.000317671	0.000185459	0.00024522	0.000336233	0	0.000602129	0.000351818	6.68161e-05	0.000398523	0.000930788	0.000767681	0.00088456	0.000383861	0.000251004	0.000792696	0.000952873	35503.7
		Aldehyde dehydrogenase, mitochondrial OS=Homo sapiens GN=ALDH2 PE=1 SV=2	ALDH2	18	526.03	2.24111e-06	0.000531021	0.00137232	0.000327065	0	0.000258742	0.00136345	2.95037e-05	0.000405492	4.563e-06	0.000201842	0.000612047	0.000237725	0.000931361	0.000377356	0.000432754	0.000148748	0.00014884	0.000748564	0.000195837	0.000799944	0	0.00172963	0.000463796	0.000673243	0.000253136	0.000182525	0.000430415	0.000345294	0.000464088	0.000132598	0.0002829	0.000130404	56382.4
		Hemoglobin subunit delta OS=Homo sapiens GN=HBD PE=1 SV=2	HBD	14	519.77	9.39448e-06	0.0057805	0.01107	0.0118711	0	0.00813736	0.00484435	0.00296103	0.00218425	3.79067e-07	0.000369826	0.00202378	0.00146907	0.00294508	0.00491111	0.0147542	0.00214353	0.00132739	0.0197478	0.00678122	0.0109669	0.00205303	0.0093576	0.0084923	0.00167929	0.0149198	0.00769523	0.0114784	0.0138156	0.00232598	0.0158245	0.00915994	0.00412489	16054.2
		Nucleolin OS=Homo sapiens GN=NCL PE=1 SV=3	NCL	15	513.98	6.07968e-06	1.32282e-05	8.16443e-05	3.24216e-06	0	0.00012461	0.000124495	2.16969e-05	0.000391739	7.81263e-05	7.10511e-06	0.000193901	0.000208975	0.00122908	0.00206289	0.000780704	0.000573117	0.000278813	0.00108107	8.81062e-05	0.000103831	1.37091e-05	0.000245602	0.000407443	0.00037668	0.000178146	0.00075586	0.000393202	0.000736023	0.000329753	0.000313948	0.000521542	0.000176772	76616.3
		Serotransferrin OS=Homo sapiens GN=TF PE=1 SV=3	TF	17	507.097	1.44034e-06	8.59193e-05	0.00116208	1.39167e-05	0.00428175	0.00188044	0.000287559	3.71675e-05	4.5051e-05	4.39397e-06	0.00048432	0.00042885	2.92988e-05	0.001194	0.000458077	0.000698191	0.000412299	0.000591159	0.000137287	0.000100654	0.000125441	5.81724e-05	0.000601811	0.000112884	0.00114169	0.000276418	0.000616956	0.000150638	5.80188e-05	6.13971e-05	0.000195016	0.00021247	0.000108914	77065.2
		X-ray repair cross-complementing protein 5 OS=Homo sapiens GN=XRCC5 PE=1 SV=3	XRCC5	17	504.08	1.02583e-05	2.04688e-05	8.12173e-05	0	0	8.80872e-05	9.95336e-05	0.000182137	0.00014163	3.18774e-05	2.15363e-05	9.40923e-05	2.92984e-05	0.000472535	0.00168814	0.00066551	0.000604705	0.000240499	0.000116714	0.000139587	0.000190105	0	6.19955e-05	3.70077e-05	5.42806e-05	0.000254542	0.000446409	0.000485932	0.000370647	9.21821e-05	7.77401e-05	0.000281261	0.000166959	82708.1
Core matrisome	ECM Glycoproteins	Matrix-remodeling-associated protein 5 OS=Homo sapiens GN=MXRA5 PE=2 SV=3	MXRA5	16	500.83	2.4131e-06	1.41637e-05	0	2.52206e-06	0	1.05953e-05	2.23982e-05	8.92996e-07	1.42687e-06	1.61967e-05	0.000188217	1.0977e-05	0	0.000121516	0.000106494	0.000276717	0.00077344	1.77181e-05	2.97876e-07	5.52879e-05	2.60512e-06	8.50857e-06	7.89939e-06	1.72733e-05	1.03262e-05	5.29152e-05	8.63438e-06	4.01545e-05	2.81371e-05	1.90197e-05	4.74094e-06	1.8712e-05	0.000216311	312164
		Isocitrate dehydrogenase [NADP], mitochondrial OS=Homo sapiens GN=IDH2 PE=1 SV=2	IDH2	19	498.26	0	0.000210274	0.000448221	0.000185204	0	9.0842e-06	3.33613e-05	0.000161958	0.000725178	3.01401e-05	0.000510717	0.000656165	5.30414e-05	0.000409456	0.00112322	0.000620454	0.000616012	0.000104032	0.000163073	0.000169161	0.00029448	0.0177228	8.00775e-05	1.65111e-05	0.000574621	0.000230997	0.000224124	0.00018261	0.000166626	0.000319694	7.81332e-05	0.000210472	0.000123196	50910.3
		Protein disulfide-isomerase A6 OS=Homo sapiens GN=PDIA6 PE=1 SV=1	PDIA6	17	497.25	1.25092e-05	2.34378e-05	0.000154206	0.000125745	0	0.00026743	4.76549e-05	0.000117705	3.38033e-05	7.01304e-05	1.17927e-05	0.000193336	6.70665e-05	0.000815278	0.00098886	0.000755185	0.0014619	0.000488514	0.00014941	0.000220709	0.000178758	0	0.000218579	0	0.000100589	0.000380788	0.000623656	0.00054064	0.000378464	0.000135663	0.000127854	0.00032817	0.000391962	48122.4
		Tropomyosin alpha-1 chain OS=Homo sapiens GN=TPM1 PE=1 SV=2	TPM1	16	490.6	0	0.00341618	0.00558452	2.21408e-05	5.1421e-05	0.00414704	0.00152984	0.00309263	0.00347181	0	0.000202325	0.000717936	0.0020165	0.00324731	0.000718509	0.00104958	0.00259884	0.00127449	0.00469578	0.00152738	0.00177642	0.000260085	0.00356699	0.00120627	0.00220522	0.00854764	0.00172173	0.00132666	0.00102479	0.00288392	0.00100323	0.00167829	0.00413669	32708.7
Core matrisome	Proteoglycans	Versican core protein OS=Homo sapiens GN=VCAN PE=1 SV=3	VCAN	18	486.07	6.40592e-06	0.000175389	0.000258342	2.27386e-05	0	0.000208389	0.000560039	6.88807e-05	4.80766e-05	1.1052e-05	1.36741e-06	3.38835e-05	3.64436e-07	0.00209448	0.000579722	0.00139591	0.00209583	0.00032259	0.000110483	0.000647244	0.000251332	0.000571762	8.35751e-05	0.000765729	0.000129618	0.000825671	0.000358178	0.00186693	0.000457273	0.000207213	0.000199701	0.000720227	0.00319715	372831
		Heterogeneous nuclear ribonucleoproteins A2/B1 OS=Homo sapiens GN=HNRNPA2B1 PE=1 SV=2	HNRNPA2B1	10	486.03	1.87411e-05	4.9376e-05	0.000109853	0.000119736	0	0.000153307	9.59393e-05	2.34664e-05	7.1501e-05	8.13043e-05	0.000188084	6.4985e-05	8.44358e-06	0.00101102	0.00207234	0.000704202	0.000213086	0.000175082	1.20986e-05	2.01642e-05	9.14741e-05	7.77947e-05	0.000117128	0.000115657	2.47353e-05	0.00010921	0.000145441	0.000268191	0.000530373	0.000111927	0.000115552	0.000382372	0.000154617	37429.4
		Sarcoplasmic/endoplasmic reticulum calcium ATPase 2 OS=Homo sapiens GN=ATP2A2 PE=1 SV=1	ATP2A2	6	485.88	0	1.76719e-05	3.09208e-05	1.38735e-05	0	4.13342e-05	0.000114649	0.000116989	0.00010874	0	0	0.000169223	6.85472e-05	0.000101602	0.000268285	0.000140821	0.000128423	0.000105565	5.12707e-05	5.29145e-05	0.000102186	0	9.99495e-05	6.74587e-06	5.90021e-05	1.52159e-05	0.000149092	0.000118056	0.00012691	9.76284e-05	3.50803e-05	0.000114118	7.84507e-05	114762
		Dolichyl-diphosphooligosaccharide--protein glycosyltransferase subunit 1 OS=Homo sapiens GN=RPN1 PE=1 SV=1	RPN1	21	484.62	1.49958e-05	7.16055e-06	0.000174087	0	2.19435e-06	0.000102922	0.000253307	0.000381489	0.000218869	1.39007e-06	0.00021011	0.000430307	0.00020188	0.000711264	0.00122118	0.00099152	0.000785099	0.000244983	0.000122634	0.000173559	0.000209139	2.10368e-05	0.000222564	0.000208886	0.000273757	9.67383e-05	0.000326876	0.00035216	0.000572977	0.0002892	0.000275928	0.000347374	0.000438995	68572.4
		Heterogeneous nuclear ribonucleoprotein U OS=Homo sapiens GN=HNRNPU PE=1 SV=6	HNRNPU	14	483.35	6.16037e-06	1.12272e-05	0.000199801	0	0.00112049	9.90232e-05	7.94699e-05	2.29348e-06	0.000131933	0	2.16634e-06	0.000218416	2.58933e-05	0.000647921	0.00115304	0.000874749	0.000923295	0.000125392	3.47654e-05	2.42946e-05	6.29134e-05	1.33297e-06	5.22609e-05	5.51294e-05	9.06812e-05	0.000118421	0.000100174	0.000324002	0.00038209	6.1816e-05	8.56463e-05	0.000145752	0.00029826	90585.6
		Histone H4 OS=Homo sapiens GN=HIST1H4A PE=1 SV=2	HIST1H4A	13	481.08	7.50384e-07	0.0030796	0.00638609	4.21961e-06	0	0.00485343	0.00387493	0.014494	0.00754155	0	0.00414374	0.0109306	0.00339386	0.0166117	0.0316407	0.0208305	0.0207386	0.00403032	0.00444041	0.00560307	0.00588961	0.000322793	0.00861911	0.00207316	0.0052771	0.00879937	0.0062191	0.00919526	0.0175145	0.00329608	0.00920101	0.0212695	0.00713717	51596.2
		Moesin OS=Homo sapiens GN=MSN PE=1 SV=3	MSN	12	479.077	3.01091e-07	7.14613e-06	0.000291552	0	0.000285733	0.000101915	0.000181494	0.000128932	0.000206627	2.54859e-05	0.00431772	0.000231155	0.000191747	0.000768516	0.000254672	0.000591871	0.00037443	0.000147078	0.00012675	8.29233e-05	7.58537e-05	0	7.69726e-05	0.000111585	0.000284455	7.99668e-05	0.000149254	0.000167702	0.000195367	0.000151629	0.000167528	0.000198066	0.000201775	67821.7
		Staphylococcal nuclease domain-containing protein 1 OS=Homo sapiens GN=SND1 PE=1 SV=1	SND1	17	478.51	0.00178298	2.50621e-05	6.10605e-05	4.48332e-05	1.02877e-06	1.25433e-05	7.46242e-05	4.01396e-05	0.000309415	3.35566e-05	4.04295e-06	0.000349724	4.23855e-05	0.000359884	0.000681961	0.000396184	0.000502328	4.39504e-05	2.79416e-05	4.86846e-05	3.89984e-05	0	6.58256e-05	0.000161194	0.00013162	4.29011e-05	0.000225847	0.000366436	0.000185912	0.000168327	0.000140791	0.0001208	0.000192089	102001
		Ribosome-binding protein 1 OS=Homo sapiens GN=RRBP1 PE=1 SV=4	RRBP1	20	474.94	1.92388e-06	2.18908e-05	2.2744e-05	1.64095e-05	5.72979e-05	9.24572e-06	7.73046e-06	3.0627e-05	5.7183e-05	2.96443e-06	1.83173e-06	2.84773e-05	1.31224e-05	0.000309916	0.000154092	0.000384077	0.000220819	3.34404e-05	1.55821e-05	7.47586e-05	1.71341e-05	0	1.58302e-05	8.73223e-05	2.45582e-05	5.82118e-05	4.76355e-05	7.92966e-05	0.000135834	5.54845e-05	6.4743e-05	3.51666e-05	0.00014612	152474
		Voltage-dependent anion-selective channel protein 2 OS=Homo sapiens GN=VDAC2 PE=1 SV=2	VDAC2	11	472.78	1.86206e-06	0.00019422	0.000590622	0.000199591	0	0.000400198	0.000853375	0.000736869	0.000791056	6.25178e-05	0.000321769	0.00105943	0.000381754	0.000787528	0.0034804	0.000983919	0.00117691	0.000256922	0.00022661	0.000265145	0.000515298	1.73402e-06	0.000947924	0.000265735	0.000316322	0.000191244	0.000512796	0.000440152	0.0006289	0.000612404	0.000334781	0.000535268	0.000501344	31566.3
Matrisome-associated	ECM-affiliated Proteins	Annexin A5 OS=Homo sapiens GN=ANXA5 PE=1 SV=2	ANXA5	15	472.72	7.76059e-06	7.8964e-05	0.000400986	1.67267e-05	5.83256e-05	0.000112536	0.000139473	4.72214e-05	0.000152191	2.4583e-05	0.000220782	0.000296429	0.000128701	0.00143582	0.000366415	0.00124197	0.000310512	0.00177703	0.000149882	0.000451277	4.81135e-05	7.24089e-05	0.00010065	6.54556e-05	0.000210636	9.09499e-05	0.000275483	0.00195728	0.000237953	0.000294093	0.000230736	0.000304008	7.64795e-05	35937.8
		Apolipoprotein E OS=Homo sapiens GN=APOE PE=1 SV=1	APOE	11	471.117	0	9.97308e-07	4.26383e-05	8.43972e-06	0	2.72413e-05	2.07966e-05	1.5079e-05	1.05374e-05	0.000352705	1.04908e-05	0.000390615	3.69025e-05	1.08467e-05	0.000118468	9.09837e-05	7.03354e-05	6.89239e-05	2.35448e-05	0.00285029	2.69265e-05	0	4.11005e-05	3.16701e-05	1.52527e-05	8.89802e-05	7.93411e-05	5.94752e-05	1.00428e-05	2.70054e-05	1.03399e-05	7.02399e-05	7.87345e-06	36153.3
Matrisome-associated	ECM Regulators	Protein-glutamine gamma-glutamyltransferase 2 OS=Homo sapiens GN=TGM2 PE=1 SV=2	TGM2	14	470.14	0.0352708	0.000552156	0.00107612	1.65463e-05	0	0.000651994	0.000543531	0.00149016	0.000686256	0.00115923	0.000144123	0.00168548	0.000274116	0.000464853	0.00068526	0.000843196	0.00144848	0.000342025	0.00028847	0.000523402	0.000921399	2.27353e-05	0.000670991	0.000409346	0.00052668	0.000542475	0.000370504	0.000531228	0.000498723	0.00108282	0.000742247	0.000839897	0.000636719	77330.7
		Membrane primary amine oxidase OS=Homo sapiens GN=AOC3 PE=1 SV=3	AOC3	14	469.84	0	0.000362676	0.002365	0.000472918	5.74299e-06	0.0013913	0.00989308	0.00411364	0.00778378	1.08589e-06	0.00320206	0.0106659	0.00863173	0.000428584	0.000239932	0.000427555	0.00010393	0.000471223	0.00263192	0.00117036	0.00528098	0	0.00602915	0.00174642	0.00935395	0.00121525	0.000638481	0.00112959	0.000730043	0.00342173	0.00125122	0.000652765	0.000755669	84623.9
		Myosin-14 OS=Homo sapiens GN=MYH14 PE=1 SV=2	MYH14	19	469.75	0	0.000798507	0.00174033	3.85364e-05	0	0.000819359	0.000637864	0.000531954	0.00110874	7.05603e-06	0.00015808	0.00100362	0.000771558	0.00211206	0.00108982	0.00149011	0.00149623	0.000406374	0.000719055	0.000814251	0.000739347	0.000198768	0.00032236	0.000830329	0.00087286	0.000966821	0.000979066	0.000766833	0.0010205	0.00105833	0.000700353	0.00160722	0.00222769	227879
Core matrisome	ECM Glycoproteins	Tenascin-X OS=Homo sapiens GN=TNXB PE=1 SV=3	TNXB	24	468.521	8.37015e-06	0.00119803	0.000568245	3.00683e-05	2.75592e-05	0.000523821	0.000376286	0.000466302	0.00056046	0.000151568	0.000440832	0.00109144	0.00154966	6.5202e-05	6.38051e-05	1.76837e-05	7.84659e-05	0.000191708	0.00169788	0.000423585	0.000503709	7.97723e-06	0.000981278	0.000792667	0.00121143	0.000357123	0.000106326	0.000154814	0.000143421	0.00123128	0.00027709	0.000183833	7.1201e-05	464336
		Caldesmon OS=Homo sapiens GN=CALD1 PE=1 SV=3	CALD1	17	466.62	3.38158e-07	0.000566339	0.00131729	2.69628e-06	0	0.000891567	7.73305e-05	8.83301e-05	0.000164143	0	9.22332e-06	4.60995e-05	2.28624e-05	0.00172318	0.000465415	0.000822205	0.000866813	0.000166185	0.000145492	6.59078e-05	6.3452e-05	0	0.000174346	2.21441e-05	2.61876e-05	0.00018918	0.00025223	0.000287305	0.000164684	0.000134102	8.12798e-05	0.000251391	0.00112823	93231.9
Core matrisome	ECM Glycoproteins	Nidogen-1 OS=Homo sapiens GN=NID1 PE=1 SV=3	NID1	16	466.12	0	0.000367118	0.000358286	0	0.0558294	0.000525709	0.000754959	0.000679602	0.000983588	0.000241839	0.00272819	0.00374517	0.00159	5.42382e-05	0.000223791	8.50601e-05	5.0433e-05	0.000983714	0.00120732	0.00112651	0.00129702	0.000292376	0.000573733	0.000559859	0.00181992	0.000465385	0.000274057	0.000861915	0.000281946	0.00126609	0.000990466	0.000355473	0.000152775	136379
Core matrisome	ECM Glycoproteins	Nidogen-2 OS=Homo sapiens GN=NID2 PE=1 SV=3	NID2	21	465.63	1.38414e-05	0.00116394	0.00136697	0.000169694	4.54272e-06	0.00483514	0.00339577	0.00337255	0.00593093	8.71224e-05	0.00420104	0.00695637	0.00293154	0.000844432	0.000438059	0.000551899	0.000631666	0.000257687	0.00188884	0.000870629	0.00328161	6.41726e-05	0.00311098	0.00125606	0.00594633	0.00185524	0.000387907	0.000414664	0.000468064	0.00358392	0.000999027	0.000531081	0.000568555	151256
		POTE ankyrin domain family member E OS=Homo sapiens GN=POTEE PE=1 SV=3	POTEE	2	465.587	0	0.000448677	0.000404155	0	0	3.34587e-05	2.09035e-06	6.1534e-05	4.66688e-05	0	0	8.45586e-06	4.5266e-06	0.00559958	0.00170706	0.00227455	0.000699916	2.4875e-05	0.000135373	4.83855e-05	0.000160719	0	4.85709e-05	0.00081944	3.56222e-06	0.000443006	0.00064791	0.000626311	0.000354886	0.000171682	8.90243e-06	0.000259419	0.000521118	121367
		Dolichyl-diphosphooligosaccharide--protein glycosyltransferase subunit 2 OS=Homo sapiens GN=RPN2 PE=1 SV=3	RPN2	13	464.62	0.000804616	0.000110849	0.000194775	8.22991e-06	0	9.25385e-06	4.22235e-05	7.36849e-05	5.89726e-05	0	2.23565e-05	0.000126133	1.88973e-05	0.000465505	0.00070982	0.000685387	0.000828023	0.000290559	0.000112394	0.000163426	0.000199614	2.7661e-06	0.000281266	0.000102661	3.70291e-05	1.06617e-05	0.000299366	0.000307092	0.000342853	6.16358e-05	6.3537e-05	0.000256799	0.000275264	69286.4
		Polymerase I and transcript release factor OS=Homo sapiens GN=PTRF PE=1 SV=1	PTRF	15	460.85	0.000784982	0.00180102	0.00313689	2.93992e-05	1.86221e-06	0.000721296	0.00208032	0.000597114	0.00214684	0	0.000771628	0.0021043	0.00337142	0.00182089	0.00140371	0.00125019	0.000254128	0.00068393	0.00439072	0.000947392	0.00401809	1.20865e-05	0.00414927	0.00129977	0.00365948	0.00177085	0.00121252	0.00094491	0.000888191	0.00043126	0.000427689	0.00055156	0.000390891	43476.7
		Complement factor H OS=Homo sapiens GN=CFH PE=1 SV=4	CFH	22	455.73	1.30022e-05	3.52276e-05	0.000128591	0.000107342	0	8.61037e-05	0.00171265	0.00010921	0.000836737	3.43354e-06	3.81428e-05	0.00201213	0.000184874	0.000508075	0.000318593	0.000560946	0.000624199	0.00103072	0.00146975	0.000652752	0.000870359	3.00095e-05	0.00291407	0.000633848	0.00100848	0.00176875	0.000536831	0.000450757	0.000305916	0.000367807	0.000506175	0.000473332	0.000587977	139098
		Hemoglobin subunit alpha OS=Homo sapiens GN=HBA1 PE=1 SV=2	HBA1	18	455.36	0.0228805	0.000654996	0.00498725	0.00128178	0.00347682	0.00144053	0.00441173	0.00178701	0.00137957	4.90468e-05	0.000295825	0.00474914	0.00131116	0.00497553	0.0115722	0.0316507	0.00250012	0.000806295	0.0125472	0.00440866	0.00545438	6.81921e-06	0.00505491	0.001126	0.000960821	0.00577469	0.00556426	0.00605956	0.00874467	0.00252955	0.0136129	0.00563475	0.0062375	47442.3
		Protein disulfide-isomerase OS=Homo sapiens GN=P4HB PE=1 SV=3	P4HB	23	454.78	2.84672e-06	5.26922e-05	0.000267795	0.000107986	2.42537e-05	6.51663e-05	0.000125353	0.000199681	0.000113559	0.000148918	5.75745e-06	0.00010788	7.3246e-05	0.00124656	0.000914596	0.00120659	0.00121207	0.00015536	0.00014314	0.000177514	0.000120821	1.47309e-06	0.000250427	0.000174699	4.7673e-05	0.000222914	0.000296564	0.000251262	0.000162671	0.000122665	8.05355e-05	0.000166454	0.00021978	57118.1
		Alcohol dehydrogenase 1B OS=Homo sapiens GN=ADH1B PE=1 SV=2	ADH1B	8	453.75	8.92501e-05	0.000166647	0.000261418	2.6023e-05	0	0.000251783	0.000125004	7.38624e-05	0.000485047	0.000422062	1.83369e-05	5.24733e-05	0.000109736	0.000126878	0.000275559	0.000138789	1.67055e-05	6.69357e-07	8.45852e-05	1.1945e-05	1.86484e-05	1.34638e-05	4.62968e-05	7.97138e-05	2.11476e-05	3.67923e-05	6.41506e-07	3.11332e-05	0.000126226	5.85396e-05	1.11206e-05	3.60397e-05	8.8776e-06	39854.8
		Core histone macro-H2A.1 OS=Homo sapiens GN=H2AFY PE=1 SV=4	H2AFY	15	453.287	1.32324e-05	9.56715e-05	0.000390068	0.000973827	0	0.000244178	0.000219765	0.000472757	0.000958786	0	0	0.00101088	0.000379766	0.000769806	0.00249069	0.000976755	0.00167933	0.000739534	0.000294078	0.000276269	0.000232426	4.44648e-05	0.00061705	0.000133377	0.000862533	0.000310573	0.000625454	0.000968891	0.000782756	0.00015488	0.000471953	0.00109129	0.000925086	39618.4
		Keratin, type II cytoskeletal 1 OS=Homo sapiens GN=KRT1 PE=1 SV=6	KRT1	17	452.837	6.59256e-06	0.000651311	0.000663638	0.00017088	0	0.000642454	0.000554605	0.000899553	0.000349582	0.00298087	0.00295019	0.000692235	0.000343454	0.00026362	0.000234257	0.000302854	0.000302001	0.000192864	0.000382418	0.00017587	0.000332703	0.00110467	0.000361012	0.00248919	0.000381688	0.000424757	0.00017062	0.000176888	0.000450235	0.000227815	0.000497963	0.00010702	0.000219182	66040.3
		Stomatin-like protein 2 OS=Homo sapiens GN=STOML2 PE=1 SV=1	STOML2	8	452.55	5.81636e-06	5.22647e-06	3.27538e-05	6.96391e-06	0	2.98719e-06	6.23621e-06	2.81144e-05	4.09566e-06	0	5.67001e-07	1.36178e-05	1.29493e-05	7.27994e-05	0.000444195	0.000133821	0.000145827	1.48335e-05	1.5534e-05	1.31058e-05	5.62009e-05	2.46868e-06	8.38973e-05	2.33126e-06	3.50064e-06	4.70372e-06	7.4098e-05	5.14673e-05	5.68167e-05	3.2449e-05	1.53892e-05	4.22212e-05	7.21762e-05	38534.5
Core matrisome	ECM Glycoproteins	von Willebrand factor OS=Homo sapiens GN=VWF PE=1 SV=4	VWF	17	451.15	2.55723e-06	0.00097778	0.000396412	0.00444832	0	0.000508591	0.000607612	0.000270822	0.00118825	0	0.000847483	0.00148301	0.000848533	2.42167e-05	9.68101e-05	0.000163723	8.00259e-05	0.000480795	0.000502697	0.000516819	0.000409369	0.000158666	0.000540962	0.000334338	0.000958251	0.000883862	0.000761558	0.000551589	0.000236527	0.000571135	0.000354596	0.000193357	0.000110903	309268
Core matrisome	ECM Glycoproteins	Fibrillin-2 OS=Homo sapiens GN=FBN2 PE=1 SV=3	FBN2	12	450.86	4.90404e-07	0.00573671	0.00190115	0.000138471	0.000228495	0.00360526	0.00825513	0.00477127	0.005422	0.00369055	0.0110625	0.00431519	0.00542817	0.001027	0.000496405	0.000307072	0.000727343	0.00262345	0.00929873	0.00163339	0.00241689	0.00328008	0.00464084	0.00196718	0.00186212	0.00712021	0.00191158	0.0022961	0.00115488	0.00235637	0.00146974	0.0029654	0.0014957	314772
		14-3-3 protein zeta/delta OS=Homo sapiens GN=YWHAZ PE=1 SV=1	YWHAZ	9	450.2	8.71168e-05	2.56861e-05	0.000750729	0.000281162	4.7979e-06	0.000134427	0.000424335	0.000272981	4.83957e-05	0.00023445	1.5768e-05	9.75662e-05	0.000100423	0.00122837	0.000909822	0.001052	0.000651869	0.000301421	7.127e-05	0.000241814	0.000363931	0	5.82055e-05	7.3507e-05	0.000275615	0.00111381	0.000804326	0.000351337	0.00039688	0.000133341	0.000244544	0.000184494	9.45006e-05	27744.8
Core matrisome	Proteoglycans	Asporin OS=Homo sapiens GN=ASPN PE=1 SV=2	ASPN	15	449.08	0	0.00268268	0.000530911	4.77239e-05	2.02717e-05	0.00152485	0.00608657	0.00263276	0.00251494	2.03201e-05	0.00103921	0.0023675	0.0033311	0.000562217	0.00052509	7.46838e-05	0.000145524	0.000228166	0.00318527	0.00112766	0.00128339	1.78696e-06	0.00450126	0.00115517	0.00646287	0.000779249	0.000423964	0.000966708	0.000598559	0.00206932	0.00124684	0.00068677	0.0011876	43418.9
		Major vault protein OS=Homo sapiens GN=MVP PE=1 SV=4	MVP	20	443.82	0.00167297	2.0593e-05	7.96558e-05	0.000130264	4.50767e-06	0.000127483	9.03465e-05	0.000187236	0.000128133	3.02206e-05	2.84525e-05	0.000364277	0.000106767	0.000956116	0.000267242	0.000440067	0.000729374	0.000290046	0.000107092	0.000121971	0.000173945	0	9.52674e-05	4.58332e-05	0.000255658	7.89225e-05	0.000475305	0.000339709	0.000363856	0.000200982	0.000173969	0.000339756	0.000256978	99329.8
		Protein disulfide-isomerase A4 OS=Homo sapiens GN=PDIA4 PE=1 SV=2	PDIA4	14	436.277	0	4.34208e-06	5.35451e-05	5.64017e-05	8.63478e-06	6.78563e-06	0.00030525	0.00129946	0.000194555	0	7.44469e-05	1.76824e-05	8.26867e-05	0.000383813	0.000444463	0.000401141	0.000547306	2.12985e-05	0.000164003	5.608e-05	0.000359144	0.0136198	3.05236e-05	0.000123086	2.66979e-05	4.53801e-05	8.37155e-05	7.21443e-05	3.44073e-05	6.14938e-05	3.00253e-05	3.97338e-05	0.000130086	72935.4
		Unconventional myosin-Ic OS=Homo sapiens GN=MYO1C PE=1 SV=4	MYO1C	20	436.107	0.000705693	0.00132962	0.00141448	1.16993e-05	0	0.0005121	0.00244584	0.00132504	0.00337309	4.65977e-05	0.000669881	0.00338105	0.00290514	0.000917749	0.000795496	0.000917758	0.000909535	0.000701944	0.00261966	0.00224276	0.00234454	0.000277896	0.00300078	0.000615701	0.00319586	0.000896722	0.000940663	0.000957213	0.00127911	0.000583365	0.000749062	0.00152496	0.000950743	121687
		Beta-2-glycoprotein 1 OS=Homo sapiens GN=APOH PE=1 SV=3	APOH	11	433.99	0	4.78802e-05	0.00038942	7.66447e-06	0.000186348	0	0.000405052	2.98371e-05	9.49759e-05	1.1043e-05	6.77041e-07	0.000924277	1.06423e-05	0.00082015	0.000839463	0.000871097	0.000976837	0.000914199	0.000847343	0.000410247	0.000526018	0	0.0026116	8.48138e-06	0.000221022	0.000644472	0.000463401	0.00108955	0.000391394	1.92651e-05	0.00010867	0.000929198	0.00107504	38297.8
		Cytochrome b-c1 complex subunit 1, mitochondrial OS=Homo sapiens GN=UQCRC1 PE=1 SV=3	UQCRC1	13	432.53	3.38562e-05	1.99447e-05	0.000191091	4.38399e-06	0	6.7719e-05	0.000129079	0.000154525	0.000182319	7.10861e-06	0.000126857	9.94252e-05	9.82521e-05	0.000532437	0.000802713	0.000614468	0.000512985	0.000116736	7.51856e-05	6.67121e-05	0.000126366	1.57294e-06	0.000305369	0.000314877	0.000109125	3.65145e-05	0.000188192	0.000284233	0.000373314	0.000200192	0.000104538	0.000202502	0.000240008	52646.2
		Tubulin alpha-4A chain OS=Homo sapiens GN=TUBA4A PE=1 SV=1	TUBA4A	9	431.05	0.000407068	0.000107677	0.000706768	4.60496e-05	0	3.69474e-06	4.02946e-05	0.000789624	2.6612e-05	0.00369607	4.26514e-05	0.000126897	1.18879e-05	0.00124424	0.00123738	0.00125921	0.000428688	5.81767e-05	4.52501e-05	0.000112741	5.10486e-05	4.01173e-05	4.09696e-05	0.000373198	9.78627e-06	0.000472521	0.000126777	9.94128e-05	0.000134652	1.15551e-05	1.68912e-05	5.58113e-05	9.39322e-05	49924.7
		Heat shock protein beta-1 OS=Homo sapiens GN=HSPB1 PE=1 SV=2	HSPB1	12	426.56	0	0.00036422	0.00107293	0.000131714	5.79523e-06	0.000314546	6.35755e-05	5.46105e-05	5.36808e-05	0	3.26691e-05	7.80371e-05	0.000110306	0.00377876	0.00176659	0.00242998	0.00150523	0.000547666	0.000226273	0.000437214	0.000290405	8.4324e-06	0.000143834	3.64928e-05	7.46785e-05	0.000210028	0.00129637	0.000787212	0.00040374	9.44749e-05	4.47742e-05	0.000558872	0.000470037	22781.5
		T-complex protein 1 subunit gamma OS=Homo sapiens GN=CCT3 PE=1 SV=4	CCT3	16	423.84	0.000787441	2.49266e-05	8.64945e-05	0	0	7.00135e-05	7.49786e-05	0.000146107	7.20621e-05	8.62516e-05	1.15942e-05	8.66317e-05	0	0.000333749	0.000814456	0.000289482	0.000491151	0.000172447	9.5737e-05	9.8386e-05	0.000130194	1.68623e-05	7.57768e-05	4.73421e-05	0.000246488	9.8889e-05	0.000463573	0.000177802	0.00023585	1.60715e-05	7.28846e-05	0.000229616	0.000154135	60535.9
Core matrisome	ECM Glycoproteins	Thrombospondin-2 OS=Homo sapiens GN=THBS2 PE=1 SV=2	THBS2	12	423.72	9.33891e-05	9.91514e-06	0.000247006	5.12896e-06	0	2.1359e-05	2.48799e-05	0.000234546	0.000386766	2.42319e-05	0	0.000999142	0.000171469	0.000780267	0.000265785	0.000621092	0.000426735	5.04825e-05	6.28837e-07	6.79121e-07	0.000372201	0.000108325	4.71948e-05	3.35562e-05	6.88707e-05	2.16528e-05	2.08596e-05	0.000187271	3.29922e-06	0.000455875	2.26567e-05	0.000247967	0.000283967	129992
		Putative elongation factor 1-alpha-like 3 OS=Homo sapiens GN=EEF1A1P5 PE=5 SV=1	EEF1A1P5	11	423.52	0	0.000160459	0.000216501	0	7.97007e-06	4.85573e-05	5.63656e-05	2.89686e-05	9.39982e-05	0	0	0.000603337	0.000128777	0.00124015	0.00169042	0.00122602	0.000786875	0.000239077	0.000167863	0.000209283	0.000255591	3.88351e-07	0.000261043	0.00130415	0	7.32073e-06	0.000430469	0.000226825	0.000873856	1.03371e-05	1.96233e-05	0.000712719	0.000236161	50186.2
		Perilipin-1 OS=Homo sapiens GN=PLIN1 PE=2 SV=2	PLIN1	15	423.14	0	0.00153549	0.0014141	0.00125469	3.75981e-06	0.00191148	0.00072758	0.000285608	0.00100088	0.0013675	0.000269877	0.00184183	0.000154817	0.000233912	2.55605e-05	0.000101294	2.76106e-06	6.72777e-05	0.000146642	0.000104194	0.000281181	2.82351e-05	0.00100611	0.000122247	0.00033104	0.0003345	0.000130792	0.000128617	0.000268473	0.000322533	0.00030395	0.000644277	5.60361e-05	55990.6
		Pre-mRNA-processing-splicing factor 8 OS=Homo sapiens GN=PRPF8 PE=1 SV=2	PRPF8	15	423.11	0.020482	2.29386e-06	2.2684e-05	7.11433e-05	0	0.000297286	6.64547e-05	4.81643e-05	3.69124e-05	4.05437e-05	2.70485e-06	8.37285e-05	0.000112755	0.000121271	0.000377414	0.000131253	0.000176092	0.00266265	7.0893e-05	0.000359811	0.000666599	5.59462e-06	1.60672e-05	0.000573443	6.89084e-05	0.000342694	7.71946e-05	7.13591e-05	0.00011054	1.13433e-05	1.82062e-05	3.26262e-05	3.29641e-05	273617
		U5 small nuclear ribonucleoprotein 200 kDa helicase OS=Homo sapiens GN=SNRNP200 PE=1 SV=2	SNRNP200	10	422.47	0	4.28307e-05	8.97446e-06	0	0	4.75162e-07	1.13526e-06	7.53533e-06	1.51854e-05	3.85224e-06	0	4.79456e-05	0.0010071	4.24174e-05	0.000256353	8.08547e-05	5.24845e-05	1.4147e-05	1.31426e-05	9.0075e-07	2.16252e-05	0.000164451	3.17627e-05	1.82419e-06	0	4.17042e-05	2.18917e-05	2.20966e-05	2.93322e-05	1.08291e-05	2.01221e-05	2.31932e-05	9.96464e-06	244522
		Succinate dehydrogenase [ubiquinone] flavoprotein subunit, mitochondrial OS=Homo sapiens GN=SDHA PE=1 SV=2	SDHA	10	421.01	1.70719e-06	4.03646e-06	0.000136181	0	0.000368434	1.94389e-05	9.32762e-06	0.000136192	3.38039e-05	0.0003336	0	7.37572e-05	7.31639e-05	0.000265215	0.00102799	0.000242475	0.000144114	2.19895e-05	3.55865e-05	3.88154e-05	0.000115582	5.71215e-05	0.000279984	6.4806e-06	7.53932e-05	1.45165e-05	6.01532e-05	8.11107e-05	7.3724e-05	6.28846e-05	3.15491e-05	6.67037e-05	4.84528e-05	72692.8
		Peptidyl-prolyl cis-trans isomerase B OS=Homo sapiens GN=PPIB PE=1 SV=2	PPIB	18	418.85	0.000144156	0.000300007	0.000463946	0	0	0.000670837	0.000319053	0.00125774	0.000860542	0	0.000160788	0.00109768	0.000707961	0.00239071	0.00191759	0.00201812	0.00323013	0.00102429	0.0010272	0.000994169	0.00143813	7.26639e-07	0.0017268	0.00066999	0.00073132	0.000598373	0.00160989	0.00176016	0.00170298	0.000991934	0.00106858	0.00206685	0.00143233	23742.5
		Heat shock 70 kDa protein 1-like OS=Homo sapiens GN=HSPA1L PE=1 SV=2	HSPA1L	8	418.83	0.000160951	0.0001711	0.000467548	8.12734e-06	0	1.91212e-05	4.97238e-05	1.48465e-06	3.05705e-05	0	8.61366e-06	7.80097e-05	3.55581e-05	0.00106888	0.00109623	0.000770639	0.00026114	0.000108861	4.54137e-05	2.39408e-05	4.34694e-05	0	0.000103396	1.61827e-06	0.000114902	5.01409e-05	0.000166519	0.000320258	0.000112561	3.03762e-05	7.42488e-05	0.000219466	8.33639e-05	70378
		Calcium-binding mitochondrial carrier protein SCaMC-1 OS=Homo sapiens GN=SLC25A24 PE=1 SV=2	SLC25A24	11	414.67	7.52929e-06	1.24631e-05	8.67552e-05	6.17911e-06	4.8365e-05	1.8686e-05	0.000137429	9.69966e-05	9.10824e-05	3.82043e-05	3.50736e-05	0.000109634	6.68412e-05	0.000135785	0.000487626	0.000113558	0.000184306	9.45753e-05	9.58892e-05	1.79628e-05	6.9353e-05	1.56404e-05	0.000231392	5.71957e-05	0.000118345	5.30945e-05	0.000156768	0.000162802	9.71186e-05	6.36257e-05	6.58246e-05	0.00012969	6.77844e-05	53356.5
		Elongation factor 1-delta OS=Homo sapiens GN=EEF1D PE=1 SV=5	EEF1D	8	413.13	0	2.9577e-06	2.40546e-05	0	0	2.08166e-05	1.5791e-05	2.62624e-05	4.95753e-05	0.00454927	6.43731e-06	0.000100177	1.93976e-05	0.000410202	0.000155338	0.000468542	0.000772692	6.28332e-05	2.38636e-05	6.0941e-05	2.77527e-05	0	7.13766e-05	3.09546e-05	7.6146e-05	3.96571e-05	4.31406e-05	0.000171642	0.000183422	0.000120613	2.51934e-05	8.03163e-05	0.000196637	31121.4
		Heat shock protein HSP 90-alpha OS=Homo sapiens GN=HSP90AA1 PE=1 SV=5	HSP90AA1	7	412.19	0	8.21758e-05	0.000224019	1.37714e-05	0	6.07754e-06	2.85979e-06	3.54877e-05	8.18285e-06	0	9.6538e-06	0.000132348	4.1256e-05	0.00056045	0.000442686	0.000909138	0.000107115	6.963e-05	2.74529e-05	3.47495e-05	6.99959e-05	1.4693e-05	6.08184e-05	2.26653e-06	4.11331e-06	5.13948e-05	6.25139e-05	8.4998e-05	6.83624e-05	2.92688e-05	3.25719e-05	5.06742e-05	7.19672e-05	84663.5
		Desmin OS=Homo sapiens GN=DES PE=1 SV=3	DES	16	411.86	1.60293e-05	0.00349073	0.00477581	2.37046e-05	0.000152461	0.00441274	0.00874954	0.00371653	0.00788741	0.00147781	0.00484636	0.00368419	0.0116241	0.00885359	0.00532963	0.00526195	0.00402708	0.00711626	0.00276636	0.00522311	0.00568859	0.000930027	0.00367829	0.0173598	0.0120682	0.0033915	0.00957887	0.00854038	0.00764657	0.0110217	0.00473473	0.00691833	0.00411193	53536.6
		Complement C4-B OS=Homo sapiens GN=C4B PE=1 SV=1	C4B	18	409.45	5.52661e-06	0.000279347	0.000511427	0.000161747	0	0.000372139	0.00081621	0.000163001	0.000214337	0.00014013	8.30852e-05	0.000899347	0.000110237	0.000259695	0.000203832	0.000472605	0.000213664	0.000474616	0.000591194	0.000568141	0.000473832	0.00280628	0.000218579	7.27773e-05	0.000575167	0.000427065	0.0002666	0.000372066	0.000243306	0.00018177	0.000143498	0.000215874	0.000409769	192802
		Acetyl-CoA acetyltransferase, mitochondrial OS=Homo sapiens GN=ACAT1 PE=1 SV=1	ACAT1	20	409.288	1.63433e-06	0.000556686	0.000682951	0.000219079	3.53e-05	0.000397703	0.00173411	0.000253317	0.000836278	0	9.32594e-05	0.000425314	0.000157733	0.000428858	0.000940242	0.000224285	0.000513445	0.000231009	0.000604794	0.000631967	0.00107355	5.23782e-05	0.00188887	0.000189322	0.000288419	0.00110815	0.000661681	0.000361732	0.000832397	0.000559854	0.000619703	0.000631603	0.000367034	45200.5
		T-complex protein 1 subunit alpha OS=Homo sapiens GN=TCP1 PE=1 SV=1	TCP1	18	405.75	0	5.48926e-05	0.000122492	2.33467e-05	0.000509732	0.000104705	0.000264826	0.000130393	0.000395038	0.00014964	0.00250173	0.000726768	7.36646e-05	0.000311758	0.000718572	0.000312701	0.000446519	0.000520604	0.000170078	0.00024006	0.000196248	1.42779e-06	0.000225496	6.68922e-05	0.000138158	0.000264228	0.000486177	0.000215696	0.000364146	8.25636e-05	0.000213749	0.00025757	0.000222306	60346.2
		Ubiquitin-like modifier-activating enzyme 1 OS=Homo sapiens GN=UBA1 PE=1 SV=3	UBA1	13	404.32	0	2.66014e-05	0.000141816	0	0	1.2108e-07	9.90983e-06	1.98224e-06	6.88906e-07	0.000872309	1.06207e-06	1.57173e-06	5.92383e-07	0.000427828	0.000149397	0.000823839	0.000153453	1.53319e-05	1.34435e-06	1.53527e-06	4.60701e-06	0	8.86681e-06	6.53145e-06	5.34008e-05	4.90078e-07	0.000134652	3.5329e-05	2.12112e-05	0	3.06437e-06	2.61707e-05	5.397e-06	117853
		Junction plakoglobin OS=Homo sapiens GN=JUP PE=1 SV=3	JUP	11	403.95	1.00561e-06	1.40627e-06	7.74701e-05	4.0634e-06	0	3.70996e-05	0.000201626	7.92727e-05	0.00015707	1.4711e-05	0.0001435	0.000347129	0.000216583	9.59983e-05	0.000799568	8.15984e-05	0.000113255	1.01177e-07	7.08838e-07	1.33815e-06	5.28362e-07	1.93571e-05	9.93531e-05	4.48695e-05	0.000192227	1.36357e-05	1.62271e-05	1.82465e-05	1.06299e-06	6.53889e-05	0	2.97424e-05	3.85144e-05	81747.4
		Prohibitin-2 OS=Homo sapiens GN=PHB2 PE=1 SV=2	PHB2	10	400.54	2.43281e-05	4.88113e-05	0.000119283	1.88177e-05	1.77546e-05	0.000160924	0.000245342	0.00029868	0.000375445	2.41727e-05	9.03519e-05	0.000102045	9.83396e-05	0.000318405	0.00139655	0.000491184	0.000281863	0.0001447	9.30167e-05	8.4098e-05	0.000253958	0.000172829	0.000130684	0.000182769	0.000110174	6.84669e-05	0.000131985	0.000294388	0.000367957	0.000117378	4.28474e-05	9.54652e-05	0.000275263	117496
		Ig gamma-3 chain C region OS=Homo sapiens GN=IGHG3 PE=1 SV=2	IGHG3	10	397.96	1.13222e-05	0.00148888	0.00283038	0.000517513	0.00283101	0.00154593	0.0222995	0.00352149	0.0105844	0.000338093	0.00858439	0.0160832	0.00102946	0.00258865	0.00115091	0.00398927	0.00339258	0.0124129	0.00657066	0.0149938	0.00334751	0.00370153	0.0122936	0.00249583	0.0169449	0.00541978	0.00725796	0.00177404	0.00505685	0.0040452	0.00523142	0.00250352	0.0172528	41286.1
		Platelet glycoprotein 4 OS=Homo sapiens GN=CD36 PE=1 SV=2	CD36	12	397.85	1.28393e-06	0.000219705	0.00169208	2.05123e-05	0	0.000371009	0.00287763	0.00141647	0.00462554	0	0.00249991	0.00372419	0.00379902	7.04642e-05	7.47268e-05	0.000130522	2.42903e-05	7.49729e-05	0.00122331	0.000605577	0.00302713	4.35901e-07	0.00627405	9.12177e-05	0.0065779	0.000737193	0.000228742	0.000311423	0.000456324	0.00188594	0.000579543	0.000218684	3.45462e-05	53055.2
		T-complex protein 1 subunit zeta OS=Homo sapiens GN=CCT6A PE=1 SV=3	CCT6A	13	397.437	0	3.20868e-05	9.20618e-05	7.8024e-06	0	3.12574e-05	0.000117376	9.68738e-05	0.000233345	5.92082e-06	5.61388e-05	0.000126315	0.000126959	0.000345098	0.000803002	0.000312289	0.000268689	0.00011435	0.00012705	6.98476e-05	0.00011496	2.89418e-06	0.000144275	3.1792e-05	0.000185887	7.58334e-05	0.000299286	0.000121167	0.000212196	8.44088e-05	8.08224e-05	0.000116593	0.000109276	58026.3
		Peptidyl-prolyl cis-trans isomerase A OS=Homo sapiens GN=PPIA PE=1 SV=2	PPIA	6	397.11	2.96633e-05	0.000103455	0.000574694	0.000870261	0	9.64733e-06	0.00103264	0.000750681	4.02748e-05	6.40083e-05	3.33431e-05	0.000125751	0.000498026	0.00354306	0.00148124	0.00187584	0.00119635	0.000140604	2.55899e-05	5.54664e-05	4.88801e-05	4.21687e-05	0.000168052	4.73776e-05	5.00942e-05	4.04962e-05	0.000431182	0.000406073	0.000203966	0.000245255	0.000145339	0.000502963	0.00024868	18011.4
		Cell surface glycoprotein MUC18 OS=Homo sapiens GN=MCAM PE=1 SV=2	MCAM	15	394.29	0.0017689	0.000157531	0.000840565	2.69682e-05	0	0.000104774	0.00130115	0.000388082	0.000685306	5.25901e-06	0.000130604	0.00201071	0.000793662	3.55101e-05	5.82045e-05	4.56719e-05	4.36902e-05	4.59524e-05	0.000767031	0.000418958	0.0011283	4.02829e-06	0.00119977	0.00122471	0.000835507	0.000231738	0.000109489	9.57643e-05	6.94143e-05	0.000249657	9.11611e-05	3.92249e-05	9.55784e-06	71608.3
		Dihydropyrimidinase-related protein 3 OS=Homo sapiens GN=DPYSL3 PE=1 SV=1	DPYSL3	13	386.947	0	5.41067e-05	0.000406004	0.000183796	0	3.73768e-06	0.000178897	1.00738e-05	1.89138e-05	0	1.31478e-05	4.1855e-05	3.0331e-05	0.00138031	0.000183696	0.000942868	0.000706289	0.000113019	1.26736e-05	0.000251023	1.03818e-05	3.42302e-06	2.20074e-05	5.39162e-05	4.86411e-06	3.90944e-05	5.47157e-05	0.000272236	0.000124944	3.82262e-05	7.31777e-05	0.000171383	0.000434669	61964.8
Matrisome-associated	ECM Regulators	Alpha-1-antichymotrypsin OS=Homo sapiens GN=SERPINA3 PE=1 SV=2	SERPINA3	12	386.84	0.00220084	3.22857e-05	0.000383483	2.42222e-06	3.47936e-06	0.000334422	0.000946236	7.16482e-05	0.0012578	0.000607332	1.82765e-05	0.000286843	6.4646e-05	0.000596801	0.00106841	0.00181149	0.000975457	0.00184983	2.4038e-05	0.000143672	2.91359e-05	1.05005e-05	0.000765772	2.74054e-05	0.000159495	0.00233222	0.000367675	0.000220369	0.000559811	6.14382e-06	9.3308e-06	0.000413929	0.00102948	47652.6
		Ig kappa chain C region OS=Homo sapiens GN=IGKC PE=1 SV=1	IGKC	9	386.29	0	0.00245539	0.00644112	0.00152241	0	0.00227471	0.0212767	0.00109151	0.00322372	0	0.00373171	0.0071596	0.000436789	0.00515912	0.0023407	0.00573359	0.00317865	0.0151215	0.00494709	0.0111223	0.00392244	1.28626e-05	0.00678204	0.00494258	0.0118542	0.00750648	0.0108408	0.00418425	0.00621238	0.00206782	0.00246324	0.00592343	0.00865048	11607.2
		ATP-dependent RNA helicase A OS=Homo sapiens GN=DHX9 PE=1 SV=4	DHX9	17	383.83	3.10547e-06	7.58656e-06	6.15811e-05	2.29771e-05	0	7.4433e-05	0.000118522	0.000278838	0.000161244	1.65781e-05	7.08598e-05	0.000174797	0.000122124	0.000229773	0.000724335	0.000261539	0.000320974	0.00011663	0.000252957	5.31844e-05	9.28214e-05	0	0.000105138	9.86179e-05	0.000201147	0.000109409	0.000280052	0.000309469	0.000185728	0.000466953	0.000113393	0.000141569	0.000260187	140964
Matrisome-associated	ECM Regulators	Cathepsin D OS=Homo sapiens GN=CTSD PE=1 SV=1	CTSD	12	383.16	0	7.45143e-05	0.0001924	0.00101633	0	4.31139e-06	9.32994e-05	0.00013625	0.000124817	0	2.3066e-06	0.000139108	0.000160383	0.000619844	0.000270196	0.000709214	0.000363673	0.00210585	9.74155e-05	0.000330428	0.000137642	7.48956e-05	0.000248963	9.64727e-06	0	4.22576e-05	0.00285585	0.000280847	0.000277155	0.000112664	8.14653e-05	0.00128488	0.000275532	44553.3
		Carbonic anhydrase 1 OS=Homo sapiens GN=CA1 PE=1 SV=2	CA1	9	381.03	0	0.00010243	0.000486986	0	0.00298842	2.51488e-05	0.00033604	8.50229e-06	4.28582e-05	0.000131213	2.12115e-05	0.000143004	0.00014712	8.62629e-05	0.00012581	0.00187823	6.77855e-06	0.000207605	6.0801e-05	5.62673e-05	4.30053e-05	0	0.00011334	0.000130512	0.000268807	7.31309e-05	0.000150548	6.0275e-05	0.000104854	0.000105242	0.000138384	7.90255e-05	9.53997e-05	28869.6
Matrisome-associated	ECM-affiliated Proteins	Galectin-1 OS=Homo sapiens GN=LGALS1 PE=1 SV=2	LGALS1	12	379.64	0	0.000617524	0.000775841	0	0.0108502	0.00105648	0.00213864	0.000625629	0.00140549	0.000589537	0.00141933	0.00239948	0.0016133	0.0062115	0.00169912	0.00371792	0.00445429	0.00178671	0.00046724	0.000783577	0.0010193	0.000547334	0.000445798	0.00217089	0.00188773	0.00130121	0.00370609	0.00389854	0.00246775	0.00199761	0.00176785	0.00245726	0.00118902	14714.4
		Glycerol-3-phosphate dehydrogenase, mitochondrial OS=Homo sapiens GN=GPD2 PE=1 SV=3	GPD2	12	378.434	9.38491e-06	3.52316e-06	1.14077e-05	0.0162944	0	1.30737e-06	7.88827e-07	4.2933e-06	1.23869e-05	0.00406266	0	3.48953e-05	0	0.000101095	0.000690694	6.06632e-05	0.000241838	8.17833e-06	3.29777e-06	2.6086e-06	1.5542e-05	0	2.30021e-05	1.47623e-05	2.95938e-06	6.29068e-06	3.85102e-05	1.53563e-05	2.35874e-05	5.92726e-06	5.94533e-06	1.51265e-05	5.73566e-06	80856.1
		Alpha-actinin-2 OS=Homo sapiens GN=ACTN2 PE=1 SV=1	ACTN2	8	378.017	0.000633066	2.17233e-05	9.90188e-05	1.4148e-05	0.00170035	1.35722e-05	7.97446e-05	4.77294e-06	2.92074e-05	0.00127547	3.09428e-06	1.32992e-05	8.41934e-07	0.000598251	0.000321479	0.00027488	0.00015784	1.56409e-05	4.52561e-05	8.10215e-06	2.86637e-05	6.30911e-05	3.06125e-05	2.13047e-05	3.07096e-05	0.000120273	0.000145544	0.000103264	5.33215e-05	3.64622e-05	5.93236e-06	4.73523e-05	0.000164051	103858
		Myosin light polypeptide 6 OS=Homo sapiens GN=MYL6 PE=1 SV=2	MYL6	10	376.48	0	0.000931268	0.00214178	0.000359311	2.38808e-05	0.00221475	0.000127609	0.000341154	0.000148576	1.15764e-05	0.000146829	0.0003479	6.67735e-05	0.00310752	0.001135	0.00171295	0.00337291	0.00109968	0.00190214	0.00101557	0.000497172	0.000428575	7.40061e-05	0.000614635	0.000854382	0.00406521	0.00144697	0.00156755	0.00104256	0.000576526	0.000594646	0.000866857	0.000730425	16928.7
		Basal cell adhesion molecule OS=Homo sapiens GN=BCAM PE=1 SV=2	BCAM	12	375.93	0	0.000154871	0.000381022	4.87795e-05	0.00036451	0.00011931	0.000371703	0.00012256	0.000407534	1.17916e-06	3.40155e-05	0.000125941	7.08398e-05	0.000153388	0.000694345	0.000405215	0.000154465	9.34767e-05	0.000216394	8.03843e-05	0.000276427	0	0.000274728	6.15828e-06	0.000741398	8.05073e-05	0.000245929	0.000321952	0.000105822	6.98989e-05	2.81104e-05	0.000327635	4.92024e-05	67405.2
Core matrisome	Collagens	Collagen alpha-1(III) chain OS=Homo sapiens GN=COL3A1 PE=1 SV=4	COL3A1	12	374.81	0.214619	0.0268143	0.00713582	0	0.0385265	0.000346853	1.92572e-05	0.000127816	2.91935e-05	0.0119757	5.49353e-05	8.22208e-05	0.000178523	0.00229649	0.0018067	0.000757954	0.000246328	0.00157715	0.000558997	0.00119433	0.000890209	0.0096103	0.000477331	0.0112637	0.000517146	0.000425849	0.00104763	0.000865489	0.0011396	0.000775087	0.000613614	0.000980929	0.000887853	138566
		Transgelin-2 OS=Homo sapiens GN=TAGLN2 PE=1 SV=3	TAGLN2	11	372.95	7.22256e-05	2.31609e-06	5.20256e-05	0.000757277	0	2.19825e-06	1.00263e-06	2.1585e-07	8.1793e-07	4.25374e-05	1.54026e-06	0	8.26514e-07	0.000560107	0.000345966	0.000430002	0.000903736	1.1781e-05	4.8073e-06	7.65235e-06	3.17386e-06	6.44449e-05	1.29305e-05	2.20218e-06	8.53645e-08	2.24092e-05	6.49894e-05	9.88236e-05	2.44659e-05	1.16861e-05	1.73497e-05	7.30103e-05	3.51046e-05	22390.6
		Transitional endoplasmic reticulum ATPase OS=Homo sapiens GN=VCP PE=1 SV=4	VCP	15	372.71	1.99663e-05	4.0217e-05	0.000183456	0.000146162	0	5.65709e-05	0.000366291	0.000201201	0.000129603	0.000624258	7.1946e-06	0.000243974	4.06924e-05	0.00033018	0.000557873	0.000338681	0.000234365	0.000137676	2.63604e-05	8.86392e-05	4.86939e-05	4.34944e-05	8.7752e-05	1.99496e-05	4.75634e-05	0.00010574	0.000265575	0.000166839	0.000135789	6.48966e-05	8.25927e-05	8.66903e-05	9.688e-05	89326.1
		Profilin-1 OS=Homo sapiens GN=PFN1 PE=1 SV=2	PFN1	10	372.52	0	0.000239207	0.00163473	6.63611e-06	0.0003052	3.41992e-07	1.54081e-05	4.86859e-05	1.85247e-05	1.39806e-06	0.000135358	8.51723e-05	8.71895e-05	0.00181138	0.000717766	0.00161961	0.000461199	0.000126823	5.83489e-05	0.0001171	7.84905e-05	4.36315e-06	0.000131713	0	0.000102864	3.10708e-05	0.000123441	9.85344e-05	0.00014396	0.000140657	0.000157858	0.000283574	0.000140217	15053.1
		T-complex protein 1 subunit theta OS=Homo sapiens GN=CCT8 PE=1 SV=4	CCT8	14	371.55	0.000272678	1.80626e-05	0.000258917	0	7.16002e-06	0.000106409	0.000275852	0.000279246	0.000247164	5.28566e-05	0.000114445	0.000447777	0.000261643	0.000325815	0.000646499	0.000258918	0.000456605	0.000290367	0.0003272	0.000168249	0.000243962	6.42721e-05	0.000470532	0.000167031	0.00043918	0.000204414	0.000325096	0.000252329	0.00025065	0.000386697	0.000280122	0.00025565	0.000241366	59622.2
		Tubulin beta-6 chain OS=Homo sapiens GN=TUBB6 PE=1 SV=1	TUBB6	11	370.74	0	0.000144372	0.000327097	0.000652437	0	0.000103027	8.69374e-05	0.000371598	0.000146169	6.5762e-06	4.73411e-06	0.000377574	7.52937e-05	0.000433179	0.000515967	0.000552564	0.000538167	0.000109919	6.25177e-05	9.73656e-05	9.20572e-05	1.83362e-06	0.000134515	0.000375344	6.85325e-05	9.51574e-05	0.000212701	0.000186877	0.000232838	9.8582e-05	0.000298256	6.0377e-05	0.000181543	49857.2
		Non-POU domain-containing octamer-binding protein OS=Homo sapiens GN=NONO PE=1 SV=4	NONO	13	369.224	0	2.47766e-05	0.000694428	0	0	5.47727e-05	5.85297e-05	5.22334e-05	1.09119e-05	8.50891e-07	7.67356e-05	0.000140602	9.13265e-05	0.000652169	0.0013808	0.000608605	0.000502769	6.25593e-05	8.17373e-05	3.04522e-05	2.53868e-05	1.46697e-06	4.97147e-05	6.32945e-05	8.94966e-05	3.77424e-05	0.000193994	0.000316206	0.000249345	0.000175667	0.00010495	0.000304106	0.000192957	54231.2
		Mitochondrial inner membrane protein OS=Homo sapiens GN=IMMT PE=1 SV=1	IMMT	17	368.83	0.000242541	8.97795e-05	0.00024608	3.44948e-05	0.0289491	3.97091e-05	0.000139555	6.48802e-05	0.000234076	0	4.84266e-05	0.000122414	3.67963e-05	0.000284189	0.000775507	0.000332456	0.000353909	0.000157778	8.45082e-05	8.548e-05	0.000207776	1.18023e-06	0.000308945	8.61661e-05	5.54235e-05	3.10791e-05	0.000196981	0.000208931	0.000269069	6.44547e-05	6.23563e-05	0.000216749	0.000163527	83680.2
		Gamma-interferon-inducible protein 16 OS=Homo sapiens GN=IFI16 PE=1 SV=3	IFI16	7	364.26	1.31802e-05	8.12331e-06	1.99585e-05	0	0	0.000164998	1.30508e-05	2.37395e-05	2.59147e-05	4.1477e-05	0	9.5866e-06	1.29376e-05	6.71463e-05	0.000478729	8.31004e-05	0.000147453	2.2824e-05	6.19106e-06	1.77074e-05	2.51179e-05	1.71002e-06	7.91303e-06	3.30555e-06	1.13568e-05	7.80496e-06	2.11152e-05	0.000158036	8.86632e-05	1.61225e-05	1.55541e-05	4.54038e-05	6.72381e-05	88258.9
		Polypyrimidine tract-binding protein 1 OS=Homo sapiens GN=PTBP1 PE=1 SV=1	PTBP1	9	361.58	5.93624e-06	1.85653e-05	4.13942e-06	0.000564139	0	4.74363e-07	0	0	0	0	0	1.3154e-06	4.28192e-06	0.000221628	0.000474453	0.000255994	9.45472e-05	2.91179e-06	7.49389e-07	7.4489e-07	1.72471e-06	1.29516e-06	1.41667e-06	7.36896e-05	0	1.57054e-06	4.77089e-05	5.77754e-05	5.02812e-05	1.29439e-07	8.5844e-07	3.86674e-05	3.03028e-05	57223.1
		T-complex protein 1 subunit eta OS=Homo sapiens GN=CCT7 PE=1 SV=2	CCT7	13	360.137	9.35538e-07	3.44946e-05	9.8424e-05	0.00113483	0	4.2549e-05	0.000121694	0.000108877	0.000152038	0	7.71423e-05	0.000185149	5.69102e-05	0.000199154	0.000647013	0.000218583	0.000343939	4.42934e-05	0.000421706	4.88998e-05	0.000101184	1.21923e-05	0.000124554	3.1657e-05	0.000142434	0.000138583	0.00026636	0.000113233	0.000135781	7.85987e-05	0.000342086	0.000388713	0.000310188	59368.6
		Probable ATP-dependent RNA helicase DDX17 OS=Homo sapiens GN=DDX17 PE=1 SV=2	DDX17	5	356.91	0	0	3.30272e-05	0.00109253	0	2.8023e-05	2.83106e-05	4.70418e-05	6.56312e-05	0	7.73929e-06	1.91347e-05	9.02373e-06	0.000103039	0.000281874	0.000149499	0.000146783	7.76223e-05	4.57986e-06	8.68096e-05	4.04022e-05	0	3.24286e-05	6.07037e-05	2.42484e-05	5.69477e-05	8.96377e-05	0.000120819	0.000199666	7.34682e-06	4.75524e-05	0.000146101	0.000143856	80274.5
		SAM domain and HD domain-containing protein 1 OS=Homo sapiens GN=SAMHD1 PE=1 SV=2	SAMHD1	14	356.66	0	6.81948e-06	0.000118501	2.76963e-05	0	7.65021e-05	0.000148327	0.000169412	0.00019785	0	0.000105903	0.00046043	3.4069e-05	0.000183708	0.000596426	0.000286867	0.000530352	0.000342116	1.49255e-05	0.000104111	7.82657e-05	1.65036e-06	0.000141326	9.59875e-05	0.000152956	0.000106811	0.000347239	0.000232598	0.000327042	0.00021561	0.000166826	0.000396499	9.43068e-05	72203.2
Matrisome-associated	ECM Regulators	Cathepsin B OS=Homo sapiens GN=CTSB PE=1 SV=3	CTSB	8	354.69	1.30589e-06	0.000190529	0.000130095	0	0	1.08899e-05	5.05583e-05	7.51633e-05	3.39476e-05	0	1.91879e-05	1.61786e-05	2.64258e-05	0.000536333	0.00061822	0.000466773	0.000188273	0.000438019	0.00017541	6.23707e-05	6.49503e-05	3.95923e-05	4.13707e-05	3.29168e-05	2.08827e-05	7.51442e-05	0.000509849	0.000563386	0.000287894	6.21681e-05	1.38174e-05	0.00016534	7.42536e-05	37820.6
		Ig alpha-1 chain C region OS=Homo sapiens GN=IGHA1 PE=1 SV=2	IGHA1	4	354.63	0	0.000162148	0.00119199	6.90645e-06	0	0.000258337	0.000611292	0.000153048	0.00014814	0	1.44309e-06	0.000285129	0	0.000593293	0.000119205	0.000951268	0.000215116	0.00155605	0.000349185	0.000318418	9.58645e-05	1.34279e-06	0.000286974	0.000558965	0.00037563	0.00107142	0.000334357	0.000525631	0.00019788	0.000238464	0.000467231	0.000130127	0.00038429	37653.6
		L-amino-acid oxidase OS=Homo sapiens GN=IL4I1 PE=1 SV=1	IL4I1	9	354.38	0.00142821	1.83315e-06	1.1752e-06	0	0	4.55276e-06	0.000142234	2.55261e-06	0.000183082	2.07957e-05	9.04116e-07	2.3961e-06	2.55569e-06	6.50277e-06	0.000162838	5.36023e-05	0.000294122	7.77553e-06	9.26425e-06	1.57689e-06	1.27015e-06	8.4197e-07	1.25409e-06	4.08846e-06	1.58143e-06	1.34152e-06	1.84963e-05	5.53748e-06	9.65338e-07	0	6.34093e-07	5.98719e-07	0	62882.2
Core matrisome	Collagens	Collagen alpha-2(IV) chain OS=Homo sapiens GN=COL4A2 PE=1 SV=4	COL4A2	13	353.721	3.43703e-06	0.00388377	0.00309208	0.00132008	0	0.00210736	0.00192245	0.0033667	0.00521668	0.000372399	0.0105834	0.00775379	0.013301	0.000222473	0.000179438	0.000211466	0.000415883	0.000179838	0.00204262	0.00260552	0.00272233	0.000936796	0.00277088	0.00239891	0.00822073	0.0016728	0.000556804	0.000892654	0.000465559	0.00069532	0.00136373	0.000540552	0.000451556	167560
		Heat shock-related 70 kDa protein 2 OS=Homo sapiens GN=HSPA2 PE=1 SV=1	HSPA2	7	352.97	0	7.63663e-05	0.000235895	0	4.32872e-06	1.28245e-05	2.61288e-05	4.00632e-06	2.67833e-05	0	5.2108e-06	3.29186e-05	2.96616e-07	0.000740332	0.000518994	0.000584752	0.000638173	0.000183572	1.31424e-05	0.000140644	4.47426e-05	0	0.000229773	5.2451e-05	7.80986e-06	1.76996e-05	0.000246603	0.000257169	0.000141682	4.41224e-05	4.61779e-05	0.000214192	0.000236138	70023.7
		Nucleophosmin OS=Homo sapiens GN=NPM1 PE=1 SV=2	NPM1	10	348.68	6.8293e-06	0.000332983	0.000129889	0	0	2.34472e-07	7.01424e-06	0.000114621	0.000134783	0.00199258	4.42066e-07	2.21705e-07	1.84956e-05	0.00326488	0.00605791	0.00199008	0.001553	8.24863e-05	0.000290542	0.000139409	0.000103715	1.74135e-05	7.07882e-05	3.67388e-05	2.2158e-05	4.95536e-05	0.000905908	0.000547348	0.000527491	1.46667e-05	2.96348e-05	0.00021937	0.000178665	32574.7
Matrisome-associated	ECM Regulators	Coagulation factor XIII A chain OS=Homo sapiens GN=F13A1 PE=1 SV=4	F13A1	13	348.237	0	0.000395155	0.000430179	0.000367321	0	0.000513886	0.00048078	0.000609104	0.000686142	2.09191e-06	0.000104424	0.000632001	0.000513837	0.00114809	0.000541129	0.000661185	0.000265788	0.00038243	0.00111717	0.000527575	0.00113802	3.06686e-05	0.000889349	6.38241e-05	0.000385313	0.000161972	0.000410044	0.000687565	0.000949011	0.00061318	0.00105062	0.000606377	0.000301535	83269.6
		Tubulin alpha-8 chain OS=Homo sapiens GN=TUBA8 PE=1 SV=1	TUBA8	10	348.19	0	0.00106775	0.00136411	8.30312e-06	0	0.000589964	0.00103151	0.000738216	0.00373064	0.000538978	5.71517e-06	0.000945892	0.00102527	0.00283766	0.00259866	0.00317848	0.00309713	0.00142248	0.000690197	0.00114515	0.00121234	0	0.00145228	0.000404054	0.000592628	0.000824716	0.00213164	0.00175006	0.00141829	0.000672947	0.000598541	0.00117147	0.00259141	50093.9
		Fructose-bisphosphate aldolase C OS=Homo sapiens GN=ALDOC PE=1 SV=2	ALDOC	8	348.15	1.22545e-06	5.87643e-05	0.000112371	0	0	0.00068018	0.000903143	3.8343e-05	0.00217976	0	0.00020952	0.000161967	0.000391311	0.000362376	0.000600979	0.000481599	0.00057428	0.000277267	0.00020779	0.000145706	0.000376305	9.40796e-07	0.000429331	0.000150523	0.000632992	5.36364e-05	0.00073211	0.000275887	0.000447504	9.21452e-05	4.67018e-05	0.000419612	4.64785e-05	39456.1
Matrisome-associated	ECM-affiliated Proteins	Mucin-2 OS=Homo sapiens GN=MUC2 PE=1 SV=2	MUC2	8	347.79	0	6.30691e-06	0.0001967	0.00188694	0	0.00154532	7.64635e-06	2.59986e-07	7.4457e-06	2.30944e-05	4.79125e-06	6.08268e-06	4.95492e-06	3.20721e-06	3.65468e-06	9.46126e-07	9.93957e-06	0	7.38638e-05	8.37143e-06	0	0	3.75488e-05	1.54956e-06	0.000373076	4.34072e-06	3.17991e-06	6.80075e-07	3.56378e-07	1.13436e-05	0	0	7.1323e-07	540296
		Transgelin OS=Homo sapiens GN=TAGLN PE=1 SV=4	TAGLN	10	345.45	8.16734e-06	0.000147434	0.00187371	0.0192347	0	7.39507e-05	6.17711e-05	1.8426e-06	4.17157e-05	0	1.49692e-05	1.59995e-05	1.98123e-05	0.00242223	0.000231495	0.00106146	0.00114037	7.31168e-05	2.9807e-05	4.50867e-05	1.52702e-05	0	0.000143638	1.86884e-06	0.00027729	8.961e-05	0.000101661	0.000284094	0.000102574	0.000179075	1.78708e-05	0.000368147	0.00072439	22610.1
Core matrisome	ECM Glycoproteins	Laminin subunit alpha-5 OS=Homo sapiens GN=LAMA5 PE=1 SV=8	LAMA5	24	342.18	0.00154199	0.000703197	0.00113358	8.52703e-05	9.48381e-05	0.000654011	0.000269426	0.000201079	0.00068447	0.00352528	0.000375279	0.000447676	0.000328587	7.66323e-05	0.000388143	8.44574e-05	0.00012513	0.00014588	0.000348142	0.000236959	0.0003272	1.93212e-05	0.000305225	0.000215691	0.00050473	0.000276903	0.000366967	0.000358065	0.000220028	0.000396847	0.000161602	0.000591639	3.91805e-05	399744
		Apolipoprotein A-I OS=Homo sapiens GN=APOA1 PE=1 SV=1	APOA1	9	339.96	1.09657e-06	0.000120239	0.000482103	8.29964e-06	0	8.43683e-06	0.000168732	7.59485e-05	0.000153992	0	8.35561e-06	0.000112937	5.34721e-06	0.000997532	0.00116209	0.00119318	0.000237196	0.000168156	0.000349053	0.000254759	0.000259448	6.87515e-06	0.000221723	2.16606e-05	8.56387e-05	0.000103734	0.000204168	0.000185822	0.000279576	1.50557e-05	5.57509e-05	0.000259453	4.6367e-05	30777.6
		Ig mu chain C region OS=Homo sapiens GN=IGHM PE=1 SV=3	IGHM	6	339.017	0	0.000309902	0.000323262	0.00169918	0	0.00022062	0.00106165	0.000128419	0.000219728	7.79386e-06	0.00117855	0.000880348	0.000292978	0.000122804	0.00012209	0.000147069	0.000125571	0.00101499	0.00117397	0.000823322	0.000402566	0	0.00139993	0.00037335	0.000650753	0.000262561	0.00136018	7.6809e-05	0.000331543	0.000348989	9.45841e-05	0.000599297	0.000177048	49306.3
		Heterogeneous nuclear ribonucleoproteins C1/C2 OS=Homo sapiens GN=HNRNPC PE=1 SV=4	HNRNPC	5	338.68	0	1.22626e-05	6.84032e-05	8.38219e-06	0	2.09051e-06	1.72416e-06	6.47859e-05	5.11993e-06	0.000118466	6.67468e-06	1.9639e-05	0	0.000284728	0.000637644	0.000175255	0.000188442	3.64838e-05	2.12619e-05	8.39165e-06	2.21337e-05	0	3.36799e-05	2.35237e-07	5.07247e-06	4.1719e-05	7.59621e-05	0.000169155	8.50113e-05	1.36748e-06	0	7.12674e-05	1.78988e-05	33669.9
		Glucose-6-phosphate isomerase OS=Homo sapiens GN=GPI PE=1 SV=4	GPI	9	338.51	0	6.15796e-05	0.000431146	8.1242e-05	0	0.00057659	0.000127081	4.038e-05	0.000148023	0.000378666	2.52628e-05	2.9472e-05	2.71714e-05	0.00039528	0.000163207	0.000317654	7.82661e-05	7.73008e-05	7.45146e-05	0.000172416	0.000318922	7.69796e-06	1.75754e-05	0.000763121	2.86204e-05	0.000321092	9.81067e-06	1.06678e-05	0.000355572	1.7618e-05	3.45425e-05	0.000288919	8.5714e-05	63148.7
		NAD(P) transhydrogenase, mitochondrial OS=Homo sapiens GN=NNT PE=1 SV=3	NNT	11	335.8	0	3.04679e-05	0.000147847	0.00178553	0	9.08291e-06	0.000224921	0.000174563	0.000221326	6.5036e-05	0.000100092	0.000300535	0.000156238	9.37538e-05	0.000573193	0.000185057	0.000204697	0.000117102	7.0054e-05	6.64031e-05	0.000146093	0	0.000292045	6.85639e-06	0.000229941	3.80821e-05	0.00013795	8.07428e-05	0.000222381	8.80093e-05	4.1645e-05	0.000158809	8.97015e-05	113902
		Heat shock 70 kDa protein 6 OS=Homo sapiens GN=HSPA6 PE=1 SV=2	HSPA6	4	334.41	0	4.39096e-05	6.31152e-05	0	0	0	0	4.11774e-05	3.4626e-05	2.37519e-06	1.26012e-05	3.05356e-05	0	0.000412015	0.000272786	0.000277448	0.00032746	2.8998e-05	6.88423e-06	1.127e-05	2.93109e-06	0	4.91809e-05	9.25259e-07	9.79179e-07	2.05652e-05	7.3653e-05	6.18989e-05	5.57483e-05	0.000101096	3.39305e-05	0.000108083	6.76168e-05	71030
		Keratin, type I cytoskeletal 14 OS=Homo sapiens GN=KRT14 PE=1 SV=4	KRT14	7	333.74	3.66967e-05	8.02139e-07	1.50444e-06	6.44662e-06	0	1.67326e-06	5.58061e-07	5.65475e-05	2.38068e-05	0	1.31213e-06	5.80135e-06	1.39083e-06	0.000161431	0.000857333	0.000283204	0.000102673	1.11768e-06	9.43869e-07	6.00289e-06	8.71472e-06	0	3.33486e-06	0	1.65611e-06	3.71724e-06	3.96942e-05	4.886e-05	1.10867e-07	1.17373e-05	1.04977e-05	7.82906e-07	0	51562.3
		Heterogeneous nuclear ribonucleoprotein L OS=Homo sapiens GN=HNRNPL PE=1 SV=2	HNRNPL	11	332.56	7.60208e-06	1.08014e-06	5.50769e-06	6.07377e-06	6.31803e-06	1.05419e-06	1.45106e-05	1.15519e-05	2.53116e-07	4.98666e-05	7.29953e-06	9.85198e-06	6.01535e-06	0.000188749	0.000367865	0.000177125	0.000285785	3.83955e-06	0	3.26899e-07	1.31755e-06	0	1.49759e-05	4.17812e-05	1.4308e-05	8.26411e-06	1.80973e-05	3.28709e-05	6.26301e-06	1.61862e-05	9.69308e-06	1.02325e-05	1.59483e-05	64133.4
		14-3-3 protein epsilon OS=Homo sapiens GN=YWHAE PE=1 SV=1	YWHAE	7	331.66	1.7096e-05	3.51446e-05	0.000133866	0.000614986	0	0.000477416	0.000762814	0.000482812	0.00025551	2.41039e-05	2.64635e-05	0.000455708	0.000165923	0.000635145	0.000431836	0.000451171	0.000112085	0.000144264	0.000223562	7.59801e-05	0.000199321	0	5.55667e-05	0.000382234	0.000572362	0.00104112	0.00069757	0.000211739	0.000367127	0.000123428	0.000230707	0.000104019	0.000148095	29173.9
		Ig gamma-2 chain C region OS=Homo sapiens GN=IGHG2 PE=1 SV=2	IGHG2	5	331.24	3.70532e-06	0.000540028	0.00136471	7.13508e-05	0	0.000230829	0.00220745	0.000123846	0.000149548	4.42823e-06	0.000232784	0.00148564	0.000201442	0.000229062	0.000168965	0.000384014	0.00102012	0.0021665	0.000386043	0.000454133	0.000332286	0.000180605	0.000375394	0.000272229	0.000884411	0.000318078	0.000439311	0.000443274	0.00034369	0.000169928	0.000304835	0.000364779	0.000468729	35899.6
		Tubulin beta-8 chain OS=Homo sapiens GN=TUBB8 PE=1 SV=2	TUBB8	3	330.3	0	0.00018816	0.00013008	7.4903e-06	0	0	0	0	0	0	0	3.52376e-07	0	0.0008752	0.00061163	0.000543391	0.000923254	0.000109331	8.67905e-05	4.38017e-05	0.00012168	0	0.000132578	0.000101353	1.33076e-06	5.64867e-06	0.000447874	0.000294863	0.000218606	2.0101e-05	9.62051e-06	0.000118734	6.30996e-05	49776.1
		Vigilin OS=Homo sapiens GN=HDLBP PE=1 SV=2	HDLBP	13	330.19	0.000116696	1.44488e-05	2.36901e-05	3.45562e-06	0	2.54021e-06	5.48914e-06	5.46672e-06	6.69294e-05	0	1.59133e-06	2.43201e-05	4.76045e-05	9.77891e-05	0.000101363	0.000152369	0.000271393	6.14862e-06	6.63268e-07	3.40712e-06	3.33656e-06	2.72868e-05	4.0645e-05	1.37725e-05	2.69912e-06	2.86714e-06	2.17051e-05	4.89485e-05	5.40167e-05	5.09008e-06	1.81963e-07	2.79008e-05	6.19201e-05	141462
Matrisome-associated	ECM Regulators	Pigment epithelium-derived factor OS=Homo sapiens GN=SERPINF1 PE=1 SV=4	SERPINF1	16	328.45	5.00606e-05	0.00257773	0.000242421	0.00172446	1.97553e-05	7.19231e-05	0.00022708	5.87524e-05	9.71593e-05	0.000265575	9.34123e-05	0.000159241	2.33366e-05	0.000785553	0.000132248	0.000472179	0.00122293	0.00280118	0.000805887	0.000987438	0.0010626	9.26485e-05	0.00123134	0.00231233	0.000265472	0.000699045	0.00213662	0.00212909	0.00141616	0.00044849	0.000553357	0.00250225	0.00177503	46314
		Acidic leucine-rich nuclear phosphoprotein 32 family member A OS=Homo sapiens GN=ANP32A PE=1 SV=1	ANP32A	3	327.99	0	0	3.97076e-06	0	0	0.000254099	0	0	0	0	0	0	0	5.89909e-05	0.000159833	5.74079e-05	5.9571e-05	1.08745e-06	3.12905e-05	7.85535e-06	6.37908e-06	0	2.2434e-05	0	0	4.29612e-06	5.7004e-05	2.19252e-05	4.52475e-05	0	0	3.83934e-05	8.00474e-06	28584.8
		Elongation factor 1-alpha 1 OS=Homo sapiens GN=EEF1A1 PE=1 SV=1	EEF1A1	1	327.33	4.05531e-05	0	0	0	0	0	0	0	0	0	0	0	0	4.34551e-05	3.16928e-05	3.45618e-06	0	0	0	0	0	0	0	0	0	0	0	0	0	0	0	0	0	50142
		Long-chain-fatty-acid--CoA ligase 1 OS=Homo sapiens GN=ACSL1 PE=1 SV=1	ACSL1	14	327.19	1.97764e-06	0.000166543	0.000725761	0.00048163	0.000952487	0.000382655	0.00206244	0.000765609	0.00205395	4.64454e-06	0.000880324	0.000448403	0.00119152	5.34176e-05	4.8287e-05	0.00010365	1.6207e-05	0.00011228	0.000204962	0.000197371	0.000707476	0	0.00210506	0.000187112	0.000686784	9.52831e-05	8.95617e-05	0.000203172	0.000448883	0.000390202	0.00017808	0.000171716	4.22819e-05	77946.4
		Myosin regulatory light chain 12B OS=Homo sapiens GN=MYL12B PE=1 SV=2	MYL12B	6	327.17	1.38304e-06	0.00584472	0.000136651	5.74073e-06	0.000475761	0.00640779	5.91246e-05	0.0199461	0.00473229	7.0059e-05	0.000259762	0.000142483	0.000359364	0.000696438	0.000236929	0.000375872	0.000683377	0.00105642	0.0121149	0.00891389	0.0036396	0.0398599	0.0107261	0.000428331	0.00884335	0.00182976	0.00148111	0.0117897	0.000614292	0.000216446	0.000279821	0.000204519	0.000246915	19778.6
		40S ribosomal protein S4, X isoform OS=Homo sapiens GN=RPS4X PE=1 SV=2	RPS4X	6	325.91	0.000350164	1.57042e-05	6.7752e-05	0.00100322	0	0	1.2141e-05	1.68549e-06	2.65175e-05	5.21077e-06	2.01437e-07	9.2007e-05	0	0.000226439	0.000343735	0.000312146	0.000283183	9.83014e-05	7.80964e-06	1.63539e-05	2.20165e-05	1.48165e-05	6.06549e-05	8.30939e-05	6.40642e-05	5.14968e-05	0.000261971	0.000170314	0.000207091	1.72558e-05	7.8237e-05	0.000140122	5.11889e-05	29598.3
		T-complex protein 1 subunit epsilon OS=Homo sapiens GN=CCT5 PE=1 SV=1	CCT5	9	323.68	0	4.05519e-06	3.94828e-05	5.13457e-05	0	0.000403421	0.000149952	3.96092e-05	8.38957e-05	0	3.61217e-05	0.000102352	0.000157248	0.000229511	0.000468003	0.000142908	0.000232017	7.35752e-05	1.09958e-05	1.53471e-05	3.52548e-05	1.81115e-05	7.05458e-05	3.84042e-05	0.000145534	1.18078e-05	0.000173258	7.58434e-05	8.4568e-05	1.05172e-05	3.4652e-05	7.89042e-05	1.98798e-05	59673
		Filamin-C OS=Homo sapiens GN=FLNC PE=1 SV=3	FLNC	16	323.11	9.80571e-07	0.00010646	0.0010549	6.93995e-05	5.97569e-06	2.09706e-05	9.08876e-05	0.000454831	6.37547e-05	2.81082e-05	7.66879e-06	0.000112126	0.000104689	0.00132685	0.000519134	0.000493813	0.000627457	6.81119e-05	0.000344663	0.000522617	0.000829074	5.29303e-07	0.00047564	1.2375e-05	2.34377e-05	0.000418255	0.000202517	0.000241324	0.000479832	0.000153715	7.64002e-05	0.000374821	0.000651618	291033
		Beta-actin-like protein 2 OS=Homo sapiens GN=ACTBL2 PE=1 SV=2	ACTBL2	10	322.71	5.85364e-07	0.0172632	0.0334688	0.00346525	0	0.00534678	0.00648199	0.0113908	0.0102701	1.28385e-06	0.00212634	0.0188386	0.00960602	0.0293792	0.0126673	0.0215075	0.036501	0.0142391	0.00825627	0.00880824	0.0127462	0	0.0127059	2.27899e-06	9.09235e-05	0.00880909	0.00235198	0.00296199	0.012702	0.0192465	0.0106392	0.0223738	0.0389207	42003.8
Matrisome-associated	Secreted Factors	Protein S100-A9 OS=Homo sapiens GN=S100A9 PE=1 SV=1	S100A9	12	316.97	1.93073e-06	2.70504e-07	4.96994e-05	1.19106e-05	0	0.000206157	0.00119463	0.00530443	0.00127828	9.23732e-07	0.0096716	0.00130161	0.00890876	2.38596e-05	3.22055e-05	7.04194e-05	0.000392803	3.03075e-07	0.00461816	0.000132896	0.00112656	0.000163222	0.000186715	6.53563e-05	0.00319883	0.000305233	1.89284e-05	7.29923e-05	1.80813e-05	0.00150435	0.00179105	8.14272e-05	2.06556e-05	13240.5
		Heterochromatin protein 1-binding protein 3 OS=Homo sapiens GN=HP1BP3 PE=1 SV=1	HP1BP3	12	316.96	0.000291233	2.49053e-06	8.94979e-05	0	0	0.000158273	9.87709e-05	7.21208e-05	0.00027817	0.0140354	5.6502e-05	7.51123e-05	4.66801e-05	0.00035403	0.001057	0.000285171	0.000474666	0.000205608	5.22198e-05	4.64792e-05	0.000121068	5.05403e-06	9.80086e-05	6.06004e-05	0.000147936	0.000114294	0.000313881	0.000479816	0.000497102	7.89391e-05	0.000127513	0.000404146	0.000155262	61208.6
		Erythrocyte band 7 integral membrane protein OS=Homo sapiens GN=STOM PE=1 SV=3	STOM	12	314.13	0.000206163	7.24056e-05	0.00054295	6.61366e-05	0	0.000236528	0.000417153	0.000244206	0.000531705	3.27411e-05	0.000749845	0.00130236	0.000866108	8.69186e-05	0.000197751	0.000201911	0.000191221	0.000126871	0.000539353	0.000204295	0.000567124	0	0.00105238	0.000184155	0.000345288	0.000311183	0.000140128	0.000209084	0.000283066	0.000373531	0.000428276	0.000214908	7.13165e-05	31731.3
		DNA-(apurinic or apyrimidinic site) lyase OS=Homo sapiens GN=APEX1 PE=1 SV=2	APEX1	10	313.94	7.44413e-07	3.56739e-05	0.000108903	0.000297462	0	6.42875e-05	9.83152e-05	0.000355279	0.000247086	0	2.03282e-05	4.78582e-05	0.000101779	0.000494074	0.00139277	0.000358949	0.000623224	6.89117e-05	3.50355e-05	6.29693e-05	0.000132331	0.000100637	0.000273845	2.8367e-05	0.000126383	8.1567e-05	0.000180623	0.000326493	0.000268588	0.000212619	0.000143577	0.000163896	0.000584575	35554.8
		Calreticulin OS=Homo sapiens GN=CALR PE=1 SV=1	CALR	12	312.29	1.33082e-06	3.03593e-05	2.77476e-05	2.46504e-05	0.000130436	5.22425e-06	3.72472e-05	7.77338e-05	1.64044e-05	9.08592e-07	8.5127e-07	6.22765e-05	5.8066e-07	0.000561342	0.000588258	0.000482942	0.000542729	2.71137e-05	2.09455e-05	1.35836e-05	1.61174e-05	1.02885e-06	2.72903e-05	5.10804e-05	4.80386e-06	6.95619e-05	0.000158567	8.66558e-05	5.88464e-05	4.71182e-05	3.54627e-05	2.491e-05	3.67595e-05	48142.2
		Tropomyosin alpha-3 chain OS=Homo sapiens GN=TPM3 PE=1 SV=1	TPM3	13	309.327	0	0.00199914	0.00346603	0	3.68347e-05	0.00408013	0.0017334	0.00307615	0.00318002	0	0.000418924	0.00141744	0.00223502	0.0025114	0.00168438	0.0013019	0.00213181	0.00127649	0.0059116	0.000949906	0.00202224	0.000174345	0.00201882	0.00016493	0.00109568	0.00709402	0.00210667	0.00232215	0.00192442	0.00219959	0.000957272	0.00175886	0.00162679	32818.8
		Apolipoprotein A-IV OS=Homo sapiens GN=APOA4 PE=1 SV=3	APOA4	7	309.23	0	1.37371e-07	2.28724e-05	0	0	2.39076e-06	2.02011e-06	0.000360473	7.85416e-06	7.51241e-06	4.17464e-06	1.94016e-06	6.42479e-06	3.41731e-05	1.30523e-05	3.82536e-05	2.46805e-05	1.08067e-05	1.13348e-05	0.00259128	3.74882e-07	0	1.86981e-06	0	7.67009e-06	1.41283e-05	5.19215e-06	1.22495e-05	6.83708e-06	4.63864e-05	7.84977e-08	3.72037e-06	7.86569e-06	45399.2
		Sodium/potassium-transporting ATPase subunit alpha-1 OS=Homo sapiens GN=ATP1A1 PE=1 SV=1	ATP1A1	4	309.16	0	2.8433e-06	3.19743e-05	2.57355e-05	0	5.13637e-06	6.20126e-06	9.65752e-06	2.768e-05	0	0	5.75471e-06	0	8.83695e-05	0.000144138	0.000127973	0.000129571	4.19988e-05	5.10223e-05	2.04762e-05	8.11921e-05	0	0.000116793	8.17902e-05	4.04328e-05	3.97279e-06	6.12001e-05	7.61426e-05	6.1902e-05	2.17475e-05	1.30402e-05	9.53883e-05	4.15261e-05	112902
		Integrin beta-1 OS=Homo sapiens GN=ITGB1 PE=1 SV=2	ITGB1	15	309.01	0	0.000233276	0.000798433	0.000135539	0.000201292	0.000528123	0.00143613	0.000815994	0.0016026	0.00111701	0.000317677	0.00121737	0.0010035	0.000392193	0.000495815	0.000357819	0.000536356	0.000139268	0.000735064	0.000166437	0.00066422	4.08268e-05	0.000803491	0.000201105	0.00116905	0.000430493	0.000241024	0.000320993	0.000256825	0.000287035	0.000130209	0.000233007	0.000183087	88416.1
		ATP synthase subunit O, mitochondrial OS=Homo sapiens GN=ATP5O PE=1 SV=1	ATP5O	8	308.22	3.77764e-06	5.34964e-05	0.000224053	1.74612e-05	0	0.000114877	0.000352537	0.00020712	0.000281798	0	0.000113257	0.000118963	8.56366e-05	0.000201682	0.000795155	0.000205885	0.000413893	0.000160328	6.54848e-05	0.000136368	0.000173571	1.5498e-07	0.000406966	9.04222e-05	7.15647e-05	6.53062e-05	0.000155112	0.000191291	0.000283715	7.26488e-05	7.67879e-05	0.000140797	0.00012259	23277
		Trifunctional enzyme subunit beta, mitochondrial OS=Homo sapiens GN=HADHB PE=1 SV=3	HADHB	15	306.65	6.8518e-05	0.000187089	0.000933973	5.49089e-06	7.33124e-06	0.000979354	0.00152598	0.00117181	0.00137525	3.36522e-06	0.00614148	0.00071127	0.00115905	0.00054196	0.000902644	0.000673656	0.000973108	0.00161184	0.000639263	0.000971035	0.00164127	0.000837094	0.00204222	0.000730718	0.000803612	0.000576867	0.00202571	0.00192592	0.00247258	0.00101291	0.000917163	0.00103231	0.000632116	51296.1
		ADP/ATP translocase 2 OS=Homo sapiens GN=SLC25A5 PE=1 SV=7	SLC25A5	4	305.51	0	1.29649e-05	5.53557e-05	1.51903e-06	0	9.61031e-06	7.71252e-06	2.02739e-06	3.73686e-07	0	1.51375e-05	1.93512e-06	2.2374e-05	9.68889e-05	0.000293293	0.000244039	0.000201702	4.77591e-05	3.78193e-05	4.15957e-05	3.59137e-05	1.29136e-06	0.000110465	0	6.25113e-06	1.29441e-05	6.93145e-05	4.14799e-05	6.89513e-05	8.69677e-06	7.98316e-06	2.90923e-05	1.44716e-05	32852.9
		Microtubule-associated protein 1B OS=Homo sapiens GN=MAP1B PE=1 SV=2	MAP1B	6	305.01	4.50722e-06	3.38257e-07	3.82524e-06	3.25528e-05	0	3.47968e-07	2.39486e-07	0	0	0	0	8.66627e-06	0	9.90315e-06	1.19118e-05	2.8859e-06	0.000103739	0	2.9052e-06	3.99811e-07	4.64435e-07	0	3.23565e-06	0	3.14911e-07	2.77573e-06	1.14998e-06	3.90522e-07	4.91e-06	1.07272e-05	1.80312e-06	3.33426e-06	3.77882e-07	270644
		Septin-7 OS=Homo sapiens GN=SEPT7 PE=1 SV=2	2007-09-01	6	304.29	0.0022973	1.47968e-05	5.84554e-05	0.000986555	0	0	5.29575e-05	3.00129e-05	8.78598e-05	2.26506e-05	2.80947e-06	2.07516e-05	5.61694e-05	0.000125419	0.000183246	0.00014499	0.000198519	0.000661164	2.45868e-06	7.01289e-06	6.42178e-06	5.56995e-05	2.56442e-05	0.00182205	8.92331e-05	1.43696e-05	0.000433472	0.000568682	3.12013e-05	1.56282e-05	3.51809e-05	1.56468e-05	5.70768e-05	50680.5
		Haptoglobin OS=Homo sapiens GN=HP PE=1 SV=1	HP	5	302.39	0	1.2755e-05	0.000429837	2.14146e-06	0	0.000165649	0.00162031	0.000689737	0.000369867	0	0.000130666	0.000884663	0.000293154	0.000614478	0.000165386	0.000988378	0.000207323	0.000620424	0.000676721	0.000124764	0.000442356	1.84891e-06	0.000519562	5.63894e-05	0.000245928	0.00153534	6.72202e-05	0.000172969	0.000143205	0.000226499	8.22578e-05	0.000227264	0.000109318	45205.3
		Clathrin heavy chain 2 OS=Homo sapiens GN=CLTCL1 PE=1 SV=2	CLTCL1	10	302.19	0	2.21735e-05	6.17052e-05	1.35858e-05	0	6.01709e-05	7.8159e-05	5.45138e-05	3.9557e-05	2.92125e-06	8.26909e-05	0.000107768	2.29005e-05	0.000247791	0.000290396	0.000280082	0.000281132	0.000116921	1.35198e-05	1.54709e-05	3.08801e-05	0	5.40632e-05	1.78555e-06	1.55461e-05	2.70542e-05	7.81465e-05	0.0001379	7.2746e-05	1.31084e-05	2.6081e-05	7.69396e-05	4.30391e-05	187039
		Peroxiredoxin-1 OS=Homo sapiens GN=PRDX1 PE=1 SV=1	PRDX1	13	302.04	1.33796e-05	0.000136298	0.000547045	0.00012803	0	0.000159727	0.000235787	0.000159381	0.000201548	0	0.000108428	0.00036375	0.000175172	0.00146036	0.000900055	0.000924763	0.00173116	0.000849856	8.11311e-05	0.000193031	0.000137955	0.000576185	0.00020484	0.000208073	0.00022983	0.000234773	0.000538564	0.000423829	0.000387747	0.000359865	0.000328091	0.00062923	0.000400951	22109.9
		Tensin-1 OS=Homo sapiens GN=TNS1 PE=1 SV=2	TNS1	7	301.3	2.44504e-05	0.000126819	0.000153873	1.78055e-06	0	8.38017e-06	0.000119723	8.1496e-06	0.000101443	0	8.87805e-06	0.000421194	1.85605e-05	2.8542e-05	3.98636e-05	1.33016e-05	2.86438e-05	1.8154e-05	5.34385e-05	1.71082e-05	3.58987e-05	5.72588e-06	0.000128461	2.10874e-05	8.68187e-05	4.44551e-05	4.26361e-05	4.16992e-05	3.62869e-05	5.22809e-05	2.88049e-05	3.91193e-05	1.43525e-05	185707
		Tubulin beta-8 chain-like protein LOC260334 OS=Homo sapiens PE=1 SV=1	Tubulin beta-8 chain-like protein LOC260334 OS=Homo sapiens PE=1 SV=1	3	299.957	0	5.42537e-05	8.62101e-05	0	7.1256e-06	1.31882e-05	4.43931e-05	0	5.46962e-05	0	0	4.96062e-05	0	0.000603028	0.000580024	0.000357698	0.000669285	6.84938e-05	2.13293e-05	2.19457e-05	5.87678e-05	0	7.04838e-06	0.000101353	4.49918e-06	6.63194e-05	0.000231856	0.000125697	8.38427e-05	1.19732e-05	1.69444e-06	6.84246e-05	5.91994e-05
Core matrisome	ECM Glycoproteins	Elastin OS=Homo sapiens GN=ELN PE=1 SV=3	ELN	7	298.76	0	0.000158612	0.00010384	0	0	1.06312e-05	0	0	1.79341e-05	0	2.52191e-05	2.16678e-05	2.89958e-05	1.69087e-05	1.556e-05	6.60395e-07	3.27045e-07	3.03169e-05	4.40898e-05	0.00240852	4.85475e-05	2.23498e-06	2.45013e-05	4.56825e-06	5.11414e-06	2.38221e-05	0.000106093	0.000120821	0.000210726	1.12505e-05	9.27583e-06	8.07069e-05	2.18296e-05	68470.6
		Transmembrane emp24 domain-containing protein 10 OS=Homo sapiens GN=TMED10 PE=1 SV=2	TMED10	6	298.7	0	1.33309e-06	1.02176e-05	2.97268e-06	0.0207819	1.74974e-06	4.89504e-06	1.88333e-07	3.14171e-06	0	1.29841e-05	3.14678e-06	1.51559e-05	0.00016373	0.000247502	0.000174524	0.000336861	9.26873e-06	8.33014e-06	2.08475e-05	1.67626e-05	1.46979e-05	8.00097e-06	1.62863e-05	6.45866e-07	0.000118424	8.75382e-05	0.000101241	6.68497e-05	1.05928e-06	0.000397449	4.02891e-05	1.40411e-05	24976.2
		Myosin regulatory light polypeptide 9 OS=Homo sapiens GN=MYL9 PE=1 SV=4	MYL9	9	297.67	5.31925e-07	0.00132589	0.0025251	1.4581e-05	0	0.00214726	0.000731511	0.0013433	0.00120156	0	0.000377867	0.00115479	0.00171519	0.00238606	0.000735958	0.00118143	0.00244339	0.00107952	0.00162065	0.000884737	0.000753192	0.000509775	0.000466304	0.00086385	0.00142903	0.00170018	0.00136413	0.00132503	0.00113945	0.0023903	0.00147433	0.00159293	0.00243064	19826.4
Core matrisome	ECM Glycoproteins	Spondin-1 OS=Homo sapiens GN=SPON1 PE=1 SV=2	SPON1	6	296.65	7.66298e-06	0	5.02087e-07	6.33601e-06	0	3.51902e-06	0	5.20056e-08	3.61023e-06	0	1.01478e-06	0	0	0.00028784	8.67547e-05	8.84557e-05	3.43047e-05	1.12417e-05	0	7.3304e-05	0	0	2.05545e-06	0	8.05586e-06	1.90492e-05	1.16764e-05	3.90281e-05	2.08583e-06	0	2.35129e-05	7.24724e-06	6.93608e-05	90974
		ATP synthase subunit d, mitochondrial OS=Homo sapiens GN=ATP5H PE=1 SV=3	ATP5H	9	296.59	0	6.22589e-06	6.25023e-05	1.23112e-05	0	5.6956e-05	0.000127548	4.96952e-05	0.000123936	0	1.71833e-05	0.000145504	0.00026404	0.000383267	0.00135197	0.000341411	0.000521872	8.42581e-05	3.45331e-05	6.80439e-05	5.90414e-05	0	9.15458e-05	9.1555e-05	4.27079e-05	2.63976e-05	0.000203534	0.00019019	0.000172391	1.66664e-05	4.7854e-05	9.13425e-05	4.45249e-05	18490.5
		Beta-enolase OS=Homo sapiens GN=ENO3 PE=1 SV=4	ENO3	1	296.18	0	0.000118863	0.000312909	0	0	0.00222825	3.43918e-05	0.000254986	0.000240855	0	0.000186328	1.04973e-05	0.00026123	0.000413569	0.000968417	0.000292745	0.000230603	0.0138393	5.74123e-05	0.000123778	0.00098677	0.0151911	6.62531e-05	2.90723e-05	2.47563e-05	0.00784504	0.0090008	0.00977841	0.00360838	4.19395e-05	5.75587e-05	3.32843e-05	2.38204e-05	46933.2
		Keratin, type I cytoskeletal 16 OS=Homo sapiens GN=KRT16 PE=1 SV=4	KRT16	2	296.12	0	1.60521e-05	3.63198e-05	9.10789e-06	0	0	0	6.25491e-05	8.25143e-07	3.72579e-05	0	2.19084e-05	7.61279e-07	0.000255397	0.00125489	0.000409867	0.000127096	7.03931e-06	2.61319e-05	6.9099e-06	0.000146318	0	8.68929e-05	7.4509e-05	0	6.24929e-06	7.93048e-05	6.08841e-05	6.46842e-05	5.95332e-05	2.24261e-05	2.96377e-05	6.74568e-05	51268.5
		Calpain small subunit 1 OS=Homo sapiens GN=CAPNS1 PE=1 SV=1	CAPNS1	8	295.72	2.24871e-05	1.28027e-07	0	7.03706e-05	4.95678e-05	2.11551e-06	0	4.15559e-06	2.72992e-06	0	5.89313e-06	5.83052e-06	4.63583e-06	0.000301612	0.000102992	0.000129864	3.71999e-05	6.75897e-06	2.55263e-06	9.14303e-07	0	0	2.4009e-07	5.78319e-06	4.32737e-07	4.34984e-07	2.62096e-05	2.42012e-05	1.36884e-05	0	3.06428e-06	8.45729e-06	1.23912e-06	28315.4
		Alcohol dehydrogenase 1A OS=Homo sapiens GN=ADH1A PE=1 SV=2	ADH1A	4	294.54	0	0.000647609	0.00125546	0.000748122	0	0.000883515	0.000772827	0.000488584	0.00121237	9.7308e-06	2.79505e-05	0.000786743	0.00089179	0.000818429	0.000552072	0.00013973	2.62158e-05	0.000153	0.000219968	9.11633e-05	0.000176807	0	0.000457763	6.89077e-05	0.000152314	0.000178914	5.65274e-05	5.51171e-05	0.000243388	0.000364605	0.000120743	0.000159993	0.00010854	39859
		Probable ATP-dependent RNA helicase DDX5 OS=Homo sapiens GN=DDX5 PE=1 SV=1	DDX5	6	291.83	0	3.5137e-05	4.09774e-05	9.15697e-05	0	4.47107e-05	2.5555e-05	8.39474e-06	1.49792e-05	4.62321e-05	6.86393e-06	9.02694e-06	7.91837e-06	0.000161231	0.000461877	0.000244758	0.000323148	9.5821e-05	1.97682e-05	3.65629e-05	5.23505e-05	1.0009e-05	7.83886e-06	4.53131e-05	2.81381e-05	5.35862e-05	0.000131057	0.000240892	0.00017779	6.04436e-06	4.24338e-05	0.000170041	0.000146743	69150
		Acidic leucine-rich nuclear phosphoprotein 32 family member B OS=Homo sapiens GN=ANP32B PE=1 SV=1	ANP32B	7	291.74	2.27543e-05	5.54792e-06	1.2188e-06	6.90495e-05	0	1.21943e-05	5.13515e-06	2.39929e-07	1.13496e-06	0	6.18509e-05	1.62192e-06	1.26882e-06	0.000174701	0.000659822	0.000196297	9.10135e-05	1.87061e-05	0	0	4.95989e-06	1.01186e-06	2.10106e-05	1.47706e-07	7.76869e-05	1.63306e-06	0.000122072	9.1947e-05	0.000109511	6.62063e-06	0	5.85216e-05	1.3007e-05	28787.3
		FACT complex subunit SPT16 OS=Homo sapiens GN=SUPT16H PE=1 SV=1	SUPT16H	8	290.63	5.78231e-05	0	2.66372e-06	0.000252453	0	2.0962e-06	0	4.7434e-06	7.54327e-07	6.6793e-06	2.32642e-05	3.17184e-06	2.64427e-06	4.35577e-05	0.000349658	8.10447e-05	8.77621e-05	8.60653e-06	4.2309e-06	4.65673e-06	1.65523e-06	1.28431e-06	6.37895e-06	0.000118135	1.59409e-05	1.09063e-06	1.12645e-05	3.9863e-05	3.2326e-05	5.50137e-06	0	2.70116e-05	7.79921e-05	119919
		14-3-3 protein beta/alpha OS=Homo sapiens GN=YWHAB PE=1 SV=3	YWHAB	8	287.67	0	1.97237e-05	0.000169679	3.36384e-05	0	2.52013e-05	1.82084e-07	9.56888e-05	6.44018e-06	5.72501e-05	0	4.79971e-06	3.72733e-06	0.000498346	0.000348849	0.000387653	0.000108175	4.45108e-05	4.06766e-05	2.09835e-05	4.07103e-05	0	1.92627e-05	9.97658e-05	1.18185e-06	0.000259758	0.00022947	0.000120772	9.93009e-05	4.62291e-06	3.71787e-05	3.97118e-05	1.77584e-05	28082
		Glutathione S-transferase P OS=Homo sapiens GN=GSTP1 PE=1 SV=2	GSTP1	9	287.59	0.000105654	3.1992e-05	0.000308798	1.68849e-05	1.83584e-05	1.43924e-05	3.67694e-05	4.85956e-06	1.09005e-05	2.85787e-05	8.09071e-07	3.70017e-07	3.14368e-07	0.00123754	0.000393515	0.000858771	7.34757e-05	3.28173e-05	5.08015e-06	2.82587e-06	5.49703e-07	5.74162e-06	1.66348e-05	0	0	8.04107e-06	4.02182e-05	3.14649e-05	2.7993e-05	6.28264e-07	2.16507e-06	7.11322e-05	8.79507e-06	23355.7
		Glycerol-3-phosphate dehydrogenase [NAD(+)], cytoplasmic OS=Homo sapiens GN=GPD1 PE=1 SV=4	GPD1	12	286.93	0	0.00039294	0.0010126	0.00179893	0	0.000277434	7.28742e-05	1.0145e-05	9.60048e-05	0.0017325	8.78899e-05	0.00116928	0.000240359	0.000105276	7.94028e-05	7.68754e-05	3.82046e-06	0	2.69847e-05	1.09083e-05	4.12733e-05	0	0.000216241	4.69449e-05	0.000104356	6.30088e-07	7.81875e-06	1.87109e-06	1.89298e-05	3.37267e-05	1.68953e-05	2.80429e-06	0	37567.7
		60S ribosomal protein L3 OS=Homo sapiens GN=RPL3 PE=1 SV=2	RPL3	12	284.67	0	2.20206e-05	6.29742e-05	1.20324e-06	0	3.88827e-05	3.93664e-05	3.95602e-06	0.000130535	0	1.19249e-05	4.89526e-06	0	0.000281756	0.00055021	0.00039326	0.000378417	0.000126281	6.10319e-06	4.20053e-05	3.2701e-05	0	4.41724e-05	0.0011464	0	4.70018e-05	0.000225012	8.60806e-05	0.000230183	1.26105e-07	2.28955e-05	0.000191224	9.07363e-05	20455
		Keratin, type II cytoskeletal 6C OS=Homo sapiens GN=KRT6C PE=1 SV=3	KRT6C	3	284.517	0	5.8265e-06	2.59346e-05	0	0	0.000276248	4.71587e-06	0.00031157	7.10565e-05	0	0.000129102	1.88274e-05	8.21669e-06	0.000512156	0.0012609	0.000532008	0.000294483	0	7.10401e-06	2.21928e-06	9.81573e-05	4.34372e-06	9.30407e-05	0	3.95377e-05	8.35853e-05	0.000317803	0.000248872	4.1089e-05	0.000102699	2.58472e-05	4.99904e-05	0.000238255	60026.7
		Plasminogen activator inhibitor 1 RNA-binding protein OS=Homo sapiens GN=SERBP1 PE=1 SV=2	SERBP1	5	282.92	0	0	1.087e-05	0	0	0	3.86778e-07	0	0	0	1.44138e-06	0	0	8.17598e-05	0.000146413	9.67229e-05	6.3836e-06	0	0	0	0	0	0	1.24064e-07	0	3.62341e-08	3.40717e-06	7.2139e-07	1.42051e-06	0	1.20528e-07	7.12498e-07	0	44965.1
		40S ribosomal protein S3 OS=Homo sapiens GN=RPS3 PE=1 SV=2	RPS3	11	280.81	6.3374e-06	0.000125517	0.000214145	1.90276e-05	7.62154e-06	0.000395684	0.000628642	0.000564512	0.000371666	0	8.79653e-05	0.000469712	0.000342041	0.00053066	0.000878063	0.000801771	0.000478516	0.000350309	0.000244314	0.000355972	0.000350899	1.08004e-06	0.000288606	0.000318987	0.000381519	0.000288432	0.000590953	0.000407105	0.00071148	0.000472865	0.000431525	0.000678639	0.000487358	54461.3
		Macrophage-capping protein OS=Homo sapiens GN=CAPG PE=1 SV=2	CAPG	9	280.8	5.06668e-06	5.57348e-06	3.91443e-06	0.00325151	1.77859e-05	4.14268e-06	5.2641e-06	0	5.45174e-06	1.12038e-06	2.29015e-06	7.79012e-07	1.32515e-06	0.000181782	8.94565e-05	6.51646e-05	0.000316067	0.000267387	7.1879e-06	5.44915e-05	2.10161e-06	1.08754e-05	0	0	0.000185418	5.49369e-06	0.000335814	7.02878e-05	2.7161e-05	0	1.26456e-05	6.28053e-05	8.08222e-06	38498.4
		Histone H2B type 3-B OS=Homo sapiens GN=HIST3H2BB PE=1 SV=3	HIST3H2BB	3	280.76	0	6.20143e-05	5.90333e-06	3.04622e-05	0	4.08352e-07	0	1.00749e-06	8.23414e-08	1.05412e-05	0	6.46481e-07	0	0.00177629	0.00296035	0.000350689	0.00103153	0.00026364	0.000234381	0.00130433	0.000966836	2.24385e-06	0.000168331	2.8131e-07	0	0	0.000395501	0.00027008	0.00122947	0	0	0.000226123	0.000104319	13907.1
		Succinyl-CoA ligase [GDP-forming] subunit beta, mitochondrial OS=Homo sapiens GN=SUCLG2 PE=1 SV=2	SUCLG2	6	280.17	0	1.59955e-05	0.00011715	1.71041e-05	0	3.03315e-07	3.94513e-07	0	0	0	0	5.04796e-06	0	0.000156521	0.00027827	0.00013677	4.6028e-05	1.01965e-05	1.4032e-05	9.51637e-06	2.54858e-05	0	8.94973e-05	1.59416e-06	1.14809e-06	8.43886e-07	3.36476e-05	4.15458e-05	4.11048e-05	1.45912e-07	0	5.59301e-05	7.66645e-06	46512.1
		Interleukin enhancer-binding factor 2 OS=Homo sapiens GN=ILF2 PE=1 SV=2	ILF2	6	278.86	0	3.55434e-05	0.000104162	0	0	0	7.18309e-05	3.21261e-07	2.0993e-06	0	6.1995e-06	3.24738e-06	1.34806e-06	0.000338944	0.000357428	0.000310409	0.00012534	8.70098e-05	1.19042e-05	2.90139e-05	5.26211e-05	0	8.27693e-05	1.35586e-06	5.51244e-06	2.41061e-06	0.000137256	0.000156571	0.000125433	2.71616e-06	1.23362e-05	7.6364e-05	4.45757e-05	43062.6
		Transketolase OS=Homo sapiens GN=TKT PE=1 SV=3	TKT	7	278.26	0	0.000105786	0.000280707	0	0	2.85033e-05	3.04327e-05	2.19678e-05	2.26507e-05	0	6.43398e-06	5.92232e-05	7.9263e-05	0.000167484	4.24981e-05	0.00021521	5.51238e-05	1.29508e-05	3.87726e-05	2.03759e-05	6.90174e-05	0	5.33194e-05	8.87529e-06	8.07516e-06	1.03401e-05	2.66755e-05	4.88328e-05	3.65524e-05	2.97033e-05	3.78078e-05	5.42457e-05	8.56549e-05	67879.9
		Glutamate dehydrogenase 1, mitochondrial OS=Homo sapiens GN=GLUD1 PE=1 SV=2	GLUD1	5	277.59	0	1.53923e-05	9.1507e-05	0	0	2.16492e-05	0.000260342	2.2547e-07	0.000268789	0	1.57984e-05	1.45763e-05	1.0608e-06	0.000230968	0.000686592	0.000290744	0.00018279	0.000181521	8.90856e-05	5.21623e-05	9.01046e-05	0	0.00018498	0	3.68821e-07	3.08216e-05	0.000291444	0.000253312	0.000250254	2.57286e-05	0.000133762	0.000333123	4.97859e-05	61399.9
		Hydroxyacyl-coenzyme A dehydrogenase, mitochondrial OS=Homo sapiens GN=HADH PE=1 SV=3	HADH	10	276.927	4.49163e-05	1.41206e-05	0.000308856	0.000215251	0	1.466e-06	7.44845e-05	0.000112411	0.000278359	1.53896e-05	0.00018454	0.000138664	0.000204698	0.000117072	0.000450886	0.00169485	0.000425516	2.46937e-07	7.68892e-05	1.79649e-05	1.46834e-05	1.20773e-06	0.000176455	7.06928e-06	8.08411e-05	1.8488e-05	2.89924e-05	7.16898e-05	7.96867e-05	6.39476e-05	3.85413e-05	2.71428e-05	1.39026e-05	34293.9
		Histone H1.4 OS=Homo sapiens GN=HIST1H1E PE=1 SV=2	HIST1H1E	4	275.88	0	0.00229381	0.000503458	0	0	0.000863467	5.73832e-05	0.000322332	0.000253018	0	0.000547499	6.55806e-05	0.000232218	4.88653e-05	0.000129962	8.09826e-05	0.0002591	0.000566728	0.000283176	0.000483827	0.000526085	0.000405504	0.000513998	0.000525654	0.000182142	0.00033475	0.000462271	0.00044069	0.00038525	0.00044229	0.000483212	0.000374638	0.000505111	35101.1
Matrisome-associated	ECM-affiliated Proteins	Hemopexin OS=Homo sapiens GN=HPX PE=1 SV=2	HPX	7	275.83	3.24225e-06	1.20762e-06	7.10848e-05	4.7735e-06	0	1.07695e-06	1.87971e-05	5.67223e-07	2.46129e-06	0	6.17042e-06	7.20493e-07	0	0.000597805	0.000204799	0.000229247	4.70737e-05	5.94416e-05	1.04777e-05	1.69194e-05	1.47956e-05	0	9.5163e-06	0	2.80448e-06	3.97601e-05	3.25834e-05	4.39967e-05	2.20285e-05	0	0	4.80913e-05	1.29478e-05	51676.2
		Clusterin OS=Homo sapiens GN=CLU PE=1 SV=1	CLU	9	275.49	0	0.000524205	0.00114047	9.93106e-06	0	0.000529632	0.000439997	0.00031751	0.000464285	0	0.000197618	0.000444431	0.000262944	0.000693449	0.000787876	0.000698585	0.000133353	0.000894643	0.000411243	0.00451294	0.000287886	0.00111033	0.000506542	5.68851e-05	0.000524377	0.000436602	0.000694909	0.000500082	0.000414371	0.000291993	0.000185233	0.000434592	0.000385355	52494.9
		Glutamate dehydrogenase 2, mitochondrial OS=Homo sapiens GN=GLUD2 PE=1 SV=2	GLUD2	10	275.4	0	8.42437e-05	0.000410492	3.58485e-06	0	0.000510553	0.000327743	0.000248687	0.000374678	8.46855e-07	2.43961e-05	0.000394812	7.44219e-05	0.000312974	0.000916985	0.000289189	0.000197369	0.00038855	0.000127906	0.000269299	0.000221373	5.35147e-06	0.000465266	0.000388286	0.00034002	0.000197513	0.000214496	0.000127471	0.000444705	0.000325857	0.000208767	0.000445462	0.000182328	61436
Matrisome-associated	ECM-affiliated Proteins	Annexin A11 OS=Homo sapiens GN=ANXA11 PE=1 SV=1	ANXA11	9	274.56	1.5589e-05	4.30448e-06	5.53636e-05	0.00898096	0	2.38202e-05	2.34179e-05	1.56347e-05	4.45777e-05	9.4591e-07	5.95677e-06	0.000120197	1.82185e-06	0.000197114	0.000303719	0.000248634	5.87973e-05	8.72039e-05	3.09193e-05	5.74527e-05	5.63409e-05	5.58521e-05	1.73459e-05	4.49089e-05	1.59319e-05	1.50556e-05	7.19506e-05	0.000153824	0.00013635	3.15828e-05	3.23366e-05	3.14055e-05	1.90771e-05	54391.2
Matrisome-associated	Secreted Factors	Protein S100-A8 OS=Homo sapiens GN=S100A8 PE=1 SV=1	S100A8	10	274.017	4.7375e-07	0.0146525	0.00252777	0.00010773	0	0.0065711	0.00208497	0.00672846	0.00183314	0.000732335	0.0196184	0.00163582	0.0169426	0.000176128	0.000282315	0.000188321	0.000292163	0.00570768	0.00645623	0.00608135	0.00795154	3.57479e-05	0.00909318	0.00935374	0.0197996	0.00608202	0.00318708	0.00557823	0.00279085	0.00810117	0.0071161	0.00381012	0.00402091	10833.3
		Keratin, type I cytoskeletal 17 OS=Homo sapiens GN=KRT17 PE=1 SV=2	KRT17	6	273.63	0	9.76242e-05	1.37591e-05	0	0	0.000152351	2.06371e-05	0.000176058	0.000115377	0.000139927	1.58587e-06	2.26009e-05	0	0.000342404	0.00142881	0.000529588	9.558e-05	4.78587e-06	0	1.77442e-06	8.13925e-05	0	7.84165e-05	2.87525e-07	2.79145e-05	1.4167e-05	0.000115858	0.000186318	3.94833e-05	2.03733e-05	6.03183e-07	4.05853e-08	5.37279e-05	48106.2
		HLA class I histocompatibility antigen, B-47 alpha chain OS=Homo sapiens GN=HLA-B PE=2 SV=1	HLA-B	1	271.81	0	0	0	0	0	0	0	0	0	0	0	0	0	0	0	0	0	0	0	0	0	0	0	0	0	0	0	0	0	0	0	0	0	40570.7
		Extended synaptotagmin-1 OS=Homo sapiens GN=ESYT1 PE=1 SV=1	ESYT1	8	271.65	0	3.40511e-05	0.00012453	4.09806e-06	0	0.000124532	0.000237312	9.40868e-05	0.000168595	2.94224e-05	1.48126e-05	0.000220044	6.40908e-05	7.32616e-05	0.00018201	9.94986e-05	0.000107477	7.18214e-05	7.44424e-05	3.92494e-05	9.72022e-05	0	0.000242498	5.59797e-05	0.00017164	6.18416e-05	7.15669e-05	9.68985e-05	0.000169352	2.04305e-05	2.06364e-05	9.1493e-05	6.63263e-05	122863
		L-lactate dehydrogenase A chain OS=Homo sapiens GN=LDHA PE=1 SV=2	LDHA	12	271.44	0	3.47057e-05	0.000250645	7.80931e-06	0	2.71816e-06	5.66211e-07	0	4.30774e-06	7.63598e-05	4.66968e-06	5.98773e-06	9.84595e-07	0.000824748	8.71919e-05	0.000558148	0.000216869	8.51537e-06	3.09812e-06	3.83597e-06	1.14757e-05	0	8.60524e-06	0	6.49721e-07	3.7059e-06	4.18119e-05	3.72786e-05	2.01065e-05	1.00805e-06	5.64375e-07	6.24429e-06	1.94264e-05	36689.4
		Phosphatidylethanolamine-binding protein 1 OS=Homo sapiens GN=PEBP1 PE=1 SV=3	PEBP1	5	270.92	0	3.40505e-06	0.000132128	3.71162e-06	0	2.1454e-06	4.55007e-06	0	4.50816e-07	0.000157603	2.34654e-05	1.1412e-05	0	0.000351173	0.000111023	7.41089e-05	1.06443e-05	1.50106e-05	7.64224e-06	2.32874e-05	0	0	1.48782e-05	0	2.97442e-07	0	8.83317e-06	4.34747e-05	1.51816e-06	3.4597e-06	0	1.31677e-05	9.86717e-06	21055.9
		Histone H2A type 2-C OS=Homo sapiens GN=HIST2H2AC PE=1 SV=4	HIST2H2AC	2	270.8	0	0	0	0	0	0.000151489	2.37551e-05	7.95746e-06	1.24855e-05	0	0	0	6.88465e-07	0	4.88009e-06	4.22609e-06	7.74109e-07	0	0	4.81308e-06	0	1.36461e-07	0	7.18609e-06	0	8.86302e-05	5.48506e-08	3.06862e-06	1.29587e-06	8.7523e-06	4.867e-06	0	4.33247e-05	13987.5
Core matrisome	ECM Glycoproteins	Vitronectin OS=Homo sapiens GN=VTN PE=1 SV=1	VTN	5	269.83	0	6.22576e-05	4.53683e-05	2.24723e-05	0	0.000189256	0.000150054	8.6072e-05	8.0988e-05	1.87154e-05	0.000141762	0.00035981	6.54502e-05	0.000118727	0.000117018	0.000260885	0.000116214	0.000415477	6.40112e-05	0.00199618	4.54789e-05	0.000523347	3.91982e-05	3.2607e-07	0.000147325	0.000146685	0.000174614	0.000102014	0.000181411	3.7207e-05	3.47589e-05	7.11406e-05	2.98042e-06	54305.8
		Ezrin OS=Homo sapiens GN=EZR PE=1 SV=4	EZR	7	268.567	8.71343e-06	1.41279e-07	3.88519e-05	0.00290644	0	0.000129519	1.96645e-05	0.000178026	0.000127083	1.02902e-05	5.17761e-05	4.68462e-05	7.97308e-05	7.60199e-05	0.00019858	8.97092e-05	0.000154354	2.58027e-05	6.15445e-05	3.43899e-05	0.000129393	0.000275676	0.000124306	7.92777e-06	9.16079e-05	4.12772e-05	4.79597e-05	0.000132998	0.00010036	8.99238e-05	0.000159599	8.9774e-05	6.03165e-05	69414.7
		Ig gamma-4 chain C region OS=Homo sapiens GN=IGHG4 PE=1 SV=1	IGHG4	10	267.27	0	0.00228597	0.00337134	0	0.0217087	0.00143369	0.00985074	0.000749573	0.00231411	0.000603316	0.00262201	0.0100796	0.000673922	0.002294	0.00134885	0.00308302	0.00285023	0.00825007	0.00265828	0.00297903	0.00161505	0.000120358	0.00500134	0.00212106	0.00929322	0.00385663	0.00373646	0.00225362	0.003285	0.00222663	0.00191468	0.003053	0.00460953	35939.8
		Histone H1.2 OS=Homo sapiens GN=HIST1H1C PE=1 SV=2	HIST1H1C	1	267.19	0	0	1.52244e-05	0	0	0	0	0	0	0	0	0	0	1.84509e-05	0.000113578	7.25584e-05	0	0	0	0	0	0	0	0	0	0	0	0	1.28601e-06	0	3.9261e-07	1.58133e-06	0	39451.1
		Elongation factor Tu, mitochondrial OS=Homo sapiens GN=TUFM PE=1 SV=2	TUFM	14	267.15	0	9.86625e-05	0.000407023	5.66298e-06	0	0.000119566	0.000236693	0.000272159	0.000332896	2.18186e-05	0	0.000294921	4.8884e-05	0.000712466	0.00115203	0.000875923	0.000627103	0.000320055	6.52932e-05	0.000152739	0.000167725	0	0.000233491	8.30587e-05	0.000137049	0.000137086	0.000505779	0.000277236	0.000456725	0.000150217	4.37706e-05	0.000180949	0.000274171	49542.7
		Eukaryotic initiation factor 4A-I OS=Homo sapiens GN=EIF4A1 PE=1 SV=1	EIF4A1	5	265.24	4.16596e-06	5.39871e-06	1.35641e-06	3.12121e-05	0	0	0.00357968	6.08645e-06	0	0	0	0	5.22273e-06	5.65444e-05	6.8285e-05	7.62237e-05	0.000124671	5.37008e-06	5.62057e-07	0	0	1.46264e-05	0	0	7.69089e-06	1.10807e-06	1.52672e-05	0	5.45748e-06	2.50007e-06	1.38874e-06	6.44864e-06	1.77439e-05	46155.2
		Myb-binding protein 1A OS=Homo sapiens GN=MYBBP1A PE=1 SV=2	MYBBP1A	4	263.23	0	0	0	0.0014915	0	0	0	0	3.76609e-07	0	0	3.78585e-05	0	5.6349e-06	6.58659e-05	1.63782e-05	1.38057e-05	0	0	0	0	0	0	0	3.20983e-06	0	1.37936e-06	2.64437e-07	4.6139e-06	0	0	0	1.34946e-06	148861
		Histone H2B type F-S OS=Homo sapiens GN=H2BFS PE=1 SV=2	H2BFS	2	262.21	8.30624e-07	2.51924e-05	4.97483e-05	0	0	0.000123121	3.45435e-05	4.2708e-05	7.47856e-05	4.6768e-05	0.000202714	5.10503e-05	0.000132983	0.000676761	0.00039589	8.6847e-05	0.00135413	2.25555e-05	6.17793e-07	7.99141e-05	8.60439e-06	0	7.899e-05	2.67231e-05	9.47394e-05	0	0.000103387	6.78219e-05	5.81884e-05	8.14111e-05	7.19448e-05	0.000255722	6.42012e-05	13943.2
		High mobility group protein B1 OS=Homo sapiens GN=HMGB1 PE=1 SV=3	HMGB1	3	260.937	0	0	0	0	0	1.32347e-05	0	0	1.81766e-05	0	0	4.91355e-06	0	0.00015092	0.000261167	0.00013608	0.00021344	7.81052e-06	0	8.34134e-07	0	0	4.03974e-06	3.60135e-06	3.98386e-07	5.19026e-06	7.59135e-05	8.63109e-05	6.1405e-05	0	4.14446e-06	0.000115316	1.64844e-05	24893.1
		Glutathione S-transferase kappa 1 OS=Homo sapiens GN=GSTK1 PE=1 SV=3	GSTK1	6	260.24	0	1.09173e-05	3.04197e-05	0	0	1.26301e-05	4.6091e-05	2.90383e-05	8.22028e-05	0	0.000197764	7.23212e-05	3.61453e-05	0.000117069	0.000234866	5.79824e-05	0.000260368	6.56289e-05	1.05951e-05	4.39516e-05	2.87118e-05	0.00015726	0.000124996	0	4.74109e-05	1.04943e-05	9.56868e-05	7.20389e-05	5.0218e-05	4.4302e-05	4.48586e-05	4.94116e-05	5.95198e-05	25496.7
		AFG3-like protein 2 OS=Homo sapiens GN=AFG3L2 PE=1 SV=2	AFG3L2	6	260.04	6.63122e-06	4.68588e-07	5.53789e-07	9.00996e-06	0	0	0	0	9.7194e-07	0.000337697	0	0	3.74013e-07	1.21401e-05	0.000171244	3.58799e-05	3.27815e-05	0	0	2.20596e-07	0	0	0	1.42613e-05	0	4.27797e-06	0	5.98302e-06	3.09365e-06	0	0	0	0	88588
		Epiplakin OS=Homo sapiens GN=EPPK1 PE=1 SV=2	EPPK1	9	259.865	0	7.19885e-05	9.11485e-05	1.1737e-05	2.32821e-06	2.24685e-05	3.15733e-08	1.56033e-06	1.8156e-06	0	0	0	0	0.00057241	0.000321716	0.000524388	2.46063e-05	1.95732e-05	2.67428e-08	3.58397e-07	6.91612e-08	0	3.2071e-06	0.000162101	0.000400534	2.12751e-07	1.94792e-05	6.75751e-05	6.76717e-05	2.45239e-07	0	3.08596e-05	7.88134e-05	555647
Matrisome-associated	ECM-affiliated Proteins	Annexin A4 OS=Homo sapiens GN=ANXA4 PE=1 SV=4	ANXA4	7	259.74	1.65112e-06	3.1482e-06	4.11251e-05	7.34323e-06	0	1.2295e-06	4.16791e-06	2.76052e-05	4.53855e-05	9.87969e-06	2.08773e-06	1.32618e-05	1.10434e-05	0.000380014	0.000245332	0.000238332	0.000107132	0.000205495	2.514e-05	0.000125927	8.74525e-06	7.62382e-06	1.56138e-05	1.85756e-06	8.59467e-07	1.06864e-05	0.000266825	0.000501825	0.000159583	4.22228e-05	3.63597e-05	0.000102532	4.35661e-05	35883.5
		60S acidic ribosomal protein P0 OS=Homo sapiens GN=RPLP0 PE=1 SV=1	RPLP0	4	259.61	0	0.000163405	0.000294629	9.77311e-06	0	2.92882e-05	2.64163e-05	2.33716e-05	4.34587e-05	0	1.47039e-06	0	1.39805e-06	0.0003082	0.000490773	0.000356629	0.000312001	0.00047796	6.07631e-06	0.000350709	2.86039e-05	0	0.000498766	1.77542e-05	2.37937e-05	1.09785e-05	0.000600538	0.000259207	0.000448059	3.2153e-05	1.10083e-05	0.000483545	0.000188562	34273.9
		EH domain-containing protein 4 OS=Homo sapiens GN=EHD4 PE=1 SV=1	EHD4	6	259.21	3.38316e-06	4.30043e-06	4.12658e-05	0	0	2.96318e-05	3.76017e-05	3.67178e-05	6.332e-05	0	0	0.000143126	0	7.45524e-05	0.000135087	6.3278e-05	8.76916e-05	0.000112929	1.68757e-05	3.35346e-05	5.06189e-05	5.1086e-06	0.000212761	3.7987e-05	3.83327e-05	2.53548e-05	0.000102984	7.89465e-05	0.000123762	0.00013281	6.81963e-05	0.000140696	3.03237e-05	61177.7
		Aspartyl/asparaginyl beta-hydroxylase OS=Homo sapiens GN=ASPH PE=1 SV=3	ASPH	11	259.13	0	6.862e-05	0.000164891	8.47074e-06	2.42844e-06	2.23779e-05	0.000342905	6.8367e-05	0.000236034	0	0.000184112	0.000303249	7.01326e-05	0.000118814	0.000355238	0.000285867	0.000128373	0.000101581	0.00024453	0.000467913	0.000232307	0	0.000377834	0	0.000209727	0.000465068	0.000146276	9.62911e-05	0.000112334	2.11054e-05	0.00220403	0.000115484	7.39058e-05	85863.9
		Ras-related protein Rab-1B OS=Homo sapiens GN=RAB1B PE=1 SV=1	RAB1B	1	258.42	0	0	0	0	0	8.39123e-07	6.35322e-07	0	1.0868e-06	0	0	0	0	0	0	0	0	2.0718e-07	0	0	0	0	0	0	0	0	0	0	0	0	0	0	0	22170.8
		C4b-binding protein alpha chain OS=Homo sapiens GN=C4BPA PE=1 SV=2	C4BPA	10	258.14	0	2.42758e-06	5.44999e-05	9.25172e-06	2.9543e-06	4.92851e-05	0.00106842	0.000112574	6.21983e-05	0	3.36221e-05	0.000533879	0.000217697	0.000168266	0.000197768	0.00040523	0.000203746	0.000154613	0.000584628	0.000111539	0.000249404	0	0.000436383	1.38505e-06	0.000227939	0.000414054	3.26341e-05	5.61924e-05	8.44425e-05	0.000168266	9.28906e-05	5.47347e-05	9.89849e-05	67033.1
		Keratin, type I cytoskeletal 9 OS=Homo sapiens GN=KRT9 PE=1 SV=3	KRT9	13	258.07	0	0.00743265	0.00529533	2.2987e-05	0	0.00735374	0.00150383	0.00188845	0.00107765	0.00110864	0.00133644	0.000532185	9.61306e-05	0.000602926	0.000790551	0.000646029	0.000521826	0.00472836	0.00368562	0.00349939	0.00465339	0.000442341	0.00557156	0.00391058	0.00152936	0.00335551	0.00420197	0.00387806	0.00225895	0.00171298	0.00416747	0.00479507	0.00266503	62065
		5'-nucleotidase OS=Homo sapiens GN=NT5E PE=1 SV=1	NT5E	4	257.04	0	5.58862e-07	4.16287e-06	3.40908e-06	0	0	4.15919e-06	3.39116e-07	0	0	1.17288e-05	0	1.85072e-07	5.72431e-06	1.28782e-05	9.66294e-06	0.000104656	3.46419e-06	2.11865e-06	2.5797e-06	0	0	1.21526e-06	0	1.29293e-06	0	3.30595e-06	1.35272e-05	5.97048e-06	0	0	0	0	63370.1
		Leucine-rich repeat-containing protein 59 OS=Homo sapiens GN=LRRC59 PE=1 SV=1	LRRC59	9	256.95	0	7.72987e-06	2.31642e-05	0	0	3.38405e-05	3.55059e-05	6.78017e-05	8.61377e-05	0	0.000104415	2.63158e-05	3.21236e-05	0.000192434	0.000340052	0.000334666	0.000377594	6.72609e-05	6.1943e-06	7.43373e-05	3.69338e-05	0	3.83139e-05	3.94363e-05	2.73472e-05	2.36979e-05	6.30829e-05	0.000115502	0.000163561	6.58797e-06	1.80027e-05	0.000122674	0.000120358	34930.8
		Enoyl-CoA hydratase, mitochondrial OS=Homo sapiens GN=ECHS1 PE=1 SV=4	ECHS1	9	255.55	0	8.6001e-05	0.00015912	1.00426e-05	0	9.16665e-07	0.000241285	7.50498e-06	4.5085e-05	2.74838e-06	2.36134e-07	6.1146e-06	1.17534e-07	0.000471155	0.000403538	0.000371974	0.000168718	1.71453e-05	5.29533e-05	3.22928e-05	4.70938e-05	0	0.000267099	8.93152e-06	2.61411e-06	5.38588e-06	0.000161482	7.43685e-05	8.66792e-05	5.52061e-06	1.85763e-06	4.83354e-05	1.31443e-05	31387.4
		ADP/ATP translocase 3 OS=Homo sapiens GN=SLC25A6 PE=1 SV=4	SLC25A6	4	254.98	5.77716e-06	1.24358e-05	0.000115597	9.00752e-06	0	0.000332605	0.00112315	0.000396276	0.000411161	1.97258e-05	0.000200336	0.000294068	0.000215082	0.000193444	0.000504739	0.000413243	0.00032491	0.000114562	0.000105571	8.32837e-05	0.000127757	0	0.000348136	0.000306709	0.000353416	8.76686e-05	0.000187594	0.000114082	0.000232988	0.000161233	4.43268e-05	5.03261e-05	0.000157407	32866.8
		Interleukin enhancer-binding factor 3 OS=Homo sapiens GN=ILF3 PE=1 SV=3	ILF3	9	254.63	3.15274e-05	1.31461e-05	4.42274e-05	3.60241e-05	0.000111576	0.000165707	0.000122474	2.82029e-05	0.000140001	0.000121563	0.00039338	3.2124e-05	4.77235e-05	0.000279782	0.000481938	0.000252063	9.21391e-05	8.43253e-05	5.39803e-05	6.30185e-05	5.10629e-05	3.28274e-05	7.18491e-05	6.32123e-05	7.0407e-06	3.51656e-05	0.000162322	0.000227053	0.000168267	6.19862e-05	9.93997e-05	0.000123548	0.000165418	95340.5
		Ras-related protein Rab-1A OS=Homo sapiens GN=RAB1A PE=1 SV=3	RAB1A	2	254.53	0	1.6259e-05	4.24886e-05	0	0	2.4548e-05	5.34338e-05	1.56426e-05	1.88059e-05	0	0	4.3234e-05	3.61229e-05	5.06861e-05	5.29515e-05	6.54987e-05	3.10745e-05	1.37687e-05	1.75726e-05	3.31652e-06	1.14862e-05	0	1.92302e-05	0	1.39415e-06	1.05746e-06	2.55563e-05	1.42317e-05	1.85689e-05	3.5993e-06	1.63493e-06	2.99039e-05	4.52997e-06	22677.3
		ATP synthase subunit b, mitochondrial OS=Homo sapiens GN=ATP5F1 PE=1 SV=2	ATP5F1	7	253.01	0	0	0.000201336	1.87802e-05	0	0	2.89088e-06	1.37617e-05	0	0	0	4.84552e-05	7.79899e-06	9.02932e-05	0.000728762	0.000204378	0.000111051	1.74145e-05	8.9094e-06	7.06828e-06	1.61968e-05	4.7522e-06	3.24233e-05	3.76048e-06	0	7.5201e-05	2.50639e-05	2.78198e-05	1.54244e-05	7.80057e-06	9.96593e-06	2.09437e-05	1.105e-05	28908.5
		Talin-2 OS=Homo sapiens GN=TLN2 PE=1 SV=4	TLN2	17	252.88	0.000779487	0.00013364	0.000617693	0.000261298	0	4.10902e-05	0.000350463	5.25396e-05	0.000260723	9.65536e-06	0.000157172	0.000419517	0.000289161	0.000541708	8.96977e-05	0.000141687	0.000115755	7.25677e-05	9.62594e-05	7.90737e-05	0.000169438	6.41117e-06	0.00031173	4.66941e-05	0.000206473	8.38339e-05	0.000152493	0.000144452	0.000134225	6.35429e-05	1.65551e-05	0.000136495	0.000162435	36211.1
		Plastin-2 OS=Homo sapiens GN=LCP1 PE=1 SV=6	LCP1	7	252.75	1.43296e-06	4.13792e-06	0.000140395	0.00043951	0	4.76449e-06	4.04185e-06	2.85094e-06	3.22272e-05	0.000213404	4.23467e-07	0	0	0.000124866	5.25749e-05	0.000115157	2.40164e-05	0.000108272	5.31811e-06	1.14669e-05	5.89143e-06	0	7.07273e-06	1.76015e-06	8.45001e-06	3.33794e-06	3.06816e-05	2.97257e-05	2.25503e-05	0	4.40976e-06	5.63865e-05	7.69957e-06	70291.7
		D-3-phosphoglycerate dehydrogenase OS=Homo sapiens GN=PHGDH PE=1 SV=4	PHGDH	11	252.09	0	0.000203963	0.000244153	2.5492e-05	0	0.000151031	0.000267225	0.0001028	0.000591113	2.10991e-05	0.000197779	0.000241015	0.000250086	6.03074e-05	8.11011e-05	0.000164469	0.00026368	0.000522378	0.000200785	0.000112382	0.000245141	0.000145328	0.000325241	0.000280295	0.000258336	5.16834e-05	0.000389717	0.000217853	0.000165844	0.000228695	1.20563e-05	0.000100913	0.000131296	56651.6
		Sodium/potassium-transporting ATPase subunit alpha-2 OS=Homo sapiens GN=ATP1A2 PE=1 SV=1	ATP1A2	1	251.41	0	0	0	0	0	0	0	0	0	4.62761e-06	0	0	0	1.54337e-05	2.56377e-05	2.34608e-05	0	0	2.14825e-05	0	4.03994e-06	0	0	0	0	0	0	0	4.41155e-08	0	0	0	0	112271
		Calmodulin OS=Homo sapiens GN=CALM1 PE=1 SV=2	CALM1	8	250.83	0	0.000735338	0.000892025	1.83506e-06	6.85411e-05	0.0013853	0.00232149	0.00145285	0.00260584	0	0.000296346	0.00124352	0.00109864	0.00111762	0.000882367	0.000684486	0.000417746	0.000535319	0.00234104	0.000414464	0.0017269	7.13701e-06	0.00249485	0.000636451	0.00126452	0.00337461	0.000816531	0.000460433	0.000535867	0.000959488	0.000427812	0.000699206	0.000480847	16836.5
		UTP--glucose-1-phosphate uridylyltransferase OS=Homo sapiens GN=UGP2 PE=1 SV=5	UGP2	13	249.43	1.43945e-05	0.000278487	7.99613e-05	6.19006e-05	0	6.62617e-05	0.000553283	0.000542001	0.000116108	0	9.31933e-05	0.000781372	0.00049794	0.00025235	0.000220518	0.000273128	0.000148581	0.00022779	8.11336e-05	0.00044408	0.00038109	0.00105405	0.000502428	0.000456958	0.000402633	0.000290501	0.000459939	0.000391678	0.000183759	0.000630919	0.000447596	0.000137923	0.000107118	56942.6
		EH domain-containing protein 2 OS=Homo sapiens GN=EHD2 PE=1 SV=2	EHD2	19	249.26	4.76764e-05	0.000256877	0.000379948	1.12544e-05	1.25279e-05	0.000519113	0.0017577	0.000181665	0.00137191	1.66835e-05	0.000579137	0.000675186	0.000921436	0.000179534	0.00145515	0.00290885	3.03811e-05	3.16527e-05	0.000534688	0.00036685	0.000720872	4.93451e-06	0.000619859	0.000522449	0.00194802	0.00041086	5.12588e-05	0.000130109	0.000718479	0.000395607	0.000219972	0.000175205	0.000336174	61163.7
		14-3-3 protein gamma OS=Homo sapiens GN=YWHAG PE=1 SV=2	YWHAG	6	249.21	0	2.85429e-05	0.000323104	1.66478e-06	0	0.000127023	0.000805982	9.78788e-05	0.000301118	0	8.40308e-07	0.000472664	0.00020595	0.000278338	9.42962e-05	0.000201281	2.82571e-05	0.00011769	0.000204435	9.13489e-05	0.00016146	5.21827e-07	0.000124969	0.000148846	0.00036522	0.000303679	7.9565e-05	4.46966e-05	0.000145393	0.000144429	0.000146026	8.36061e-05	5.15211e-05	28302.1
		Chromobox protein homolog 3 OS=Homo sapiens GN=CBX3 PE=1 SV=4	CBX3	5	248.88	0	0	6.83061e-07	0	0	1.68117e-06	8.45565e-06	8.89065e-07	1.30984e-05	0	0.000151003	2.02949e-06	1.37397e-06	8.12769e-05	0.000231712	7.27295e-05	0.000112225	0	1.06653e-06	0	1.00236e-06	0	0	2.36558e-06	9.41521e-07	0	1.30101e-05	1.29056e-05	2.48949e-06	0	2.92711e-06	3.44131e-05	1.43686e-06	20810.6
		Thioredoxin domain-containing protein 5 OS=Homo sapiens GN=TXNDC5 PE=1 SV=2	TXNDC5	8	247.55	0	0	8.96734e-06	5.15346e-05	0.0007582	5.44157e-07	5.46648e-06	1.61758e-06	1.06188e-06	0	0	9.19783e-07	1.44557e-06	0.000116301	0.000162754	0.00017446	0.000263786	9.1136e-06	7.98373e-07	2.34257e-05	1.59506e-06	0	1.00107e-06	4.10589e-05	1.51427e-06	4.70686e-07	6.14873e-05	2.59357e-05	2.50069e-05	1.89656e-07	1.32425e-06	3.92874e-06	3.31779e-06	47628.7
		Elongation factor 1-gamma OS=Homo sapiens GN=EEF1G PE=1 SV=3	EEF1G	6	247.33	0	6.41101e-06	6.75204e-05	0	0	0	3.3428e-05	3.62732e-05	7.22717e-05	5.93802e-05	0	8.75765e-05	4.44665e-05	0.000150572	0.000154301	0.000239358	0.000345936	4.46492e-05	7.44933e-06	3.26453e-05	1.82737e-05	0	5.28026e-05	5.88833e-05	8.77085e-05	2.2656e-05	4.20888e-05	3.3373e-05	8.06495e-05	5.36561e-05	4.41207e-05	4.13083e-05	9.37681e-05	50119.2
		NADH-cytochrome b5 reductase 3 OS=Homo sapiens GN=CYB5R3 PE=1 SV=3	CYB5R3	11	246.837	0	5.25175e-05	0.000135971	0.000232592	0	0.000279885	0.000191484	0.000128792	0.00011485	0	4.54758e-06	0.000830882	0.000321198	0.000527597	0.000489792	0.00032472	0.000542027	0.000210764	0.000132738	0.000243739	0.00026415	4.19029e-07	0.000249924	0.000155959	0.00065174	7.55189e-05	0.000317493	0.000381192	0.000127354	0.000464652	0.000280809	0.000253184	0.000233851	34235.4
		Sorbin and SH3 domain-containing protein 1 OS=Homo sapiens GN=SORBS1 PE=1 SV=3	SORBS1	10	245.65	0	0.000143376	0.000244389	2.07228e-06	0	1.75448e-05	0.000117692	2.46923e-05	0.000134127	0	3.86194e-06	0.00101691	0.000169745	0.000114732	4.53688e-05	7.09899e-05	5.91814e-05	5.11559e-05	9.98827e-05	6.48485e-05	8.37897e-05	0.000330213	0.000178572	6.96355e-05	0.000124163	4.73352e-05	0.000109126	0.000123007	9.45942e-05	3.08254e-05	3.62491e-05	6.13858e-05	6.67399e-05	142519
		Core histone macro-H2A.2 OS=Homo sapiens GN=H2AFY2 PE=1 SV=3	H2AFY2	6	245.11	0	0	4.67635e-05	0	0	0.000281976	0.000288427	0.000236394	0.000316459	3.99821e-07	0	2.30882e-05	2.10849e-05	0.000292673	0.000928198	0.000345481	0.000543755	0.000225724	2.44415e-05	0.000103282	0.000108626	0	3.76085e-05	0.00012183	4.06476e-06	9.73515e-05	0.000275023	0.000833323	0.0003267	3.88045e-05	0.000168267	0.000388053	0.000335069	40059.4
		Ig mu heavy chain disease protein OS=Homo sapiens PE=1 SV=1	Ig mu heavy chain disease protein OS=Homo sapiens PE=1 SV=1	8	244.57	0	0.00037665	0.000504375	0	0	0.000661459	0.00514185	0.000645623	0.000736165	1.5717e-05	0.00155207	0.00159679	0.000826684	0.000133746	0.000185837	0.000157736	0.000187193	0.0011522	0.00190294	0.000737774	0.000418043	0.000236675	0.00145911	0.000927888	0.00116569	0.0016963	0.00115546	3.28858e-05	0.000397937	0.000757573	0.000175196	0.00042513	0.000206936	43056.7
		Complement C4-A OS=Homo sapiens GN=C4A PE=1 SV=1	C4A	4	244.391	0	2.48496e-05	5.42122e-05	0	0	7.51446e-06	9.01233e-05	8.88131e-05	2.93562e-05	7.24824e-07	5.01933e-05	0.000265179	3.86911e-05	2.94138e-05	3.6351e-05	0.000111212	4.00609e-05	5.95464e-05	0.000113972	4.8214e-05	4.18404e-05	0	4.29827e-05	0	3.33173e-05	8.39784e-05	4.68562e-05	3.56538e-05	3.60844e-05	2.75497e-05	3.42686e-05	1.34137e-05	0.000131848	192780
		Translational activator GCN1 OS=Homo sapiens GN=GCN1L1 PE=1 SV=6	GCN1L1	7	244.32	0	3.31608e-08	2.1551e-08	0	0	5.38614e-05	0.000235027	4.90622e-05	0.000292549	0	0.000319261	4.44345e-08	0.0001587	1.20597e-05	8.82786e-05	2.99635e-05	4.71672e-05	3.7748e-07	1.90832e-07	3.52778e-07	5.30311e-07	2.13787e-06	0	0	0	1.40653e-06	1.57719e-05	4.78106e-06	8.92272e-06	3.76143e-07	2.91822e-08	2.03831e-07	1.61052e-06	292778
		rRNA 2'-O-methyltransferase fibrillarin OS=Homo sapiens GN=FBL PE=1 SV=2	FBL	6	243.65	0	0	6.85365e-06	0.000227899	8.56447e-05	5.60245e-06	0	0	0	0.000469294	2.26624e-06	2.38417e-06	2.11512e-06	0.000173701	0.000787636	0.000160589	9.01703e-05	2.74698e-06	3.65858e-06	8.16066e-06	3.44463e-07	2.80302e-07	0	0	1.26037e-06	3.57507e-06	1.05094e-05	3.80758e-05	1.57632e-05	5.95866e-06	3.37571e-05	2.16401e-05	5.0437e-05	33783.9
		Tropomodulin-3 OS=Homo sapiens GN=TMOD3 PE=1 SV=1	TMOD3	5	241.99	0.000104512	4.82669e-06	2.16346e-05	0	0	2.0949e-05	0	4.11277e-07	0	3.80931e-05	1.2008e-06	4.03459e-06	1.55937e-07	0.0001196	9.99527e-05	7.6129e-05	0.000262885	5.89401e-05	1.84316e-05	2.78278e-05	1.89071e-05	1.19767e-06	2.57159e-05	6.73965e-07	4.00968e-06	1.46226e-06	0.000102218	9.61921e-05	8.43511e-05	0	5.94151e-07	6.32391e-05	2.27934e-05	39595.4
		POTE ankyrin domain family member I OS=Homo sapiens GN=POTEI PE=3 SV=1	POTEI	2	241.831	0	6.14932e-05	0.000134851	0	0	0.000253492	0.000264697	0.000737892	0.000284244	0	4.21238e-05	0.000191253	0	0.000994911	4.34053e-05	2.15477e-05	0.000992891	0	0.000159746	0.000247812	5.63091e-05	0	4.04227e-06	2.56442e-05	1.66942e-05	0.000292379	9.99179e-06	0	0.00032861	0.000298189	0.00024288	0.000333039	0.00025863	121286
		Histone H1.3 OS=Homo sapiens GN=HIST1H1D PE=1 SV=2	HIST1H1D	4	241.3	0	0.00214369	0.00411316	0	0	0.00823848	0.00541742	0.00582578	0.0064951	0	0.00163433	0.00307425	0.0011953	0.00242791	0.0088123	0.00341925	0.00555191	1.21499e-05	0.00112864	0.00318064	0.00309737	0	0.00491525	0.0038653	0.00509139	0.00601405	0.00486828	0.00651491	0.0122342	0.00173573	0.0141085	0.0106031	0.0151096	22350
		Gamma-enolase OS=Homo sapiens GN=ENO2 PE=1 SV=3	ENO2	5	241.15	5.16166e-05	0.000223703	0.0003608	0	0	0.000163065	0.000242246	0.000195591	0.000173536	0	0.000492327	0.000267635	0.000218276	0.00133634	0.000744597	0.000870407	0.00022571	0.000123901	0.000174938	0.00011693	0.000195858	0.000180524	0.000241945	0	0.000101011	0.000127674	0.000106097	0.000110648	0.000105971	5.51269e-06	0.000158679	0.000126536	0.00017697	47269.8
		Olfactomedin-like protein 1 OS=Homo sapiens GN=OLFML1 PE=1 SV=2	OLFML1	8	239.35	0	0.00011023	0.000184977	9.23794e-06	0	0.000574576	0.000260626	0.000620697	0.000252126	0	0	1.34017e-05	0.000409986	0.000247161	0.00020046	6.99046e-05	2.64657e-05	0.000198131	0.000226095	0.000127712	0.000346687	7.88118e-05	0.000273651	0.000718878	0.00082504	0.000295454	0.000158184	0.000203634	0.000355394	0.00101684	0.000255358	0.000362482	7.91003e-05	45951.6
		40S ribosomal protein SA OS=Homo sapiens GN=RPSA PE=1 SV=4	RPSA	6	239.15	0	2.8434e-05	0.000105483	0.000124536	0	9.39034e-05	5.01692e-05	3.72221e-05	0.000158891	0	1.73038e-05	5.14376e-05	1.45188e-05	0.000554094	0.000693145	0.000600565	0.000396107	0.000190765	0.000111278	0.000117518	0.000116948	0	0.000138896	8.32272e-05	0.000161448	6.40918e-05	0.000306703	0.000402636	0.000310526	7.30586e-05	4.88221e-05	0.000314486	9.85087e-05	32853.4
		ATP-dependent RNA helicase DDX39A OS=Homo sapiens GN=DDX39A PE=1 SV=2	DDX39A	5	238.26	0.00202176	2.0083e-05	1.52173e-05	4.99724e-05	0	1.65401e-05	1.15286e-05	2.03023e-05	7.41158e-06	1.07791e-06	6.82191e-05	1.14095e-06	2.16013e-05	0.000142851	0.000365819	0.000146604	0.000137815	4.6198e-06	1.93125e-06	4.57929e-06	1.35345e-07	0	2.63377e-05	0.000170876	1.17777e-05	0	1.89518e-05	3.47941e-05	2.20006e-05	3.08519e-06	8.47898e-07	4.29839e-07	1.82416e-05	49130.4
		Keratin, type II cytoskeletal 5 OS=Homo sapiens GN=KRT5 PE=1 SV=3	KRT5	2	238.09	0	1.64868e-06	2.17087e-06	0	3.67209e-06	0	0	1.19101e-05	0	0	0	0	0	4.39097e-05	0.000117506	9.80948e-06	2.12284e-07	0	9.33116e-07	0	2.23881e-06	0	1.43855e-05	2.2462e-05	0	1.49537e-07	1.68773e-06	4.00428e-05	7.87129e-06	5.69555e-07	3.38601e-07	3.28951e-06	5.65021e-07	62380
		Very long-chain specific acyl-CoA dehydrogenase, mitochondrial OS=Homo sapiens GN=ACADVL PE=1 SV=1	ACADVL	14	238.08	7.75294e-05	8.50115e-05	0.000220575	0.000197673	0	0.000109757	0.000400963	9.37278e-05	0.000340835	0	0.000232307	0.000276292	0.000202812	0.000132511	0.000354806	0.000275696	0.0001541	0.000105264	0.000302787	0.000409418	0.000839747	9.777e-07	0.000331746	7.86956e-06	0.000205833	0.00142354	4.4563e-05	0.000948545	0.000181454	0.00012779	6.16101e-05	5.30072e-05	0.000127844	70392.6
		Septin-2 OS=Homo sapiens GN=SEPT2 PE=1 SV=1	2002-09-01	9	236.707	0	0.000118127	0.000151046	0	0	6.05425e-05	0.000101906	3.78967e-05	0.000283446	0	4.7759e-05	0.000190337	4.43273e-05	0.000403605	0.000239284	0.000231585	0.000228552	0.000139821	5.73607e-06	7.7698e-05	4.548e-05	3.34776e-06	0.000142223	0.000120077	0.000157324	7.91249e-05	7.04268e-05	0.000145607	0.000220893	8.95435e-05	0.000114922	0.000185914	0.000346096	41487.9
		Histone H3.3 OS=Homo sapiens GN=H3F3A PE=1 SV=2	H3F3A	2	236.7	0	7.58188e-08	0	3.13307e-05	0	0	0	9.68073e-08	0	0	0	0	0	0	8.24242e-08	8.46415e-07	5.30479e-07	0	0	9.03223e-06	2.70092e-07	0	0	3.9853e-05	0	0.000298562	3.74766e-08	0	3.48374e-06	0	0	5.29374e-08	2.70095e-06	57810.5
		Alpha-actinin-3 OS=Homo sapiens GN=ACTN3 PE=1 SV=2	ACTN3	5	235.21	0.000249293	3.13657e-05	0.000268041	2.65241e-06	0	0.000123644	0.000284849	4.41986e-05	0.000156157	0	0	2.72279e-06	4.09777e-07	0.000552334	0.0005184	0.000414187	0.000358511	7.0076e-05	4.60393e-05	4.53285e-05	8.91187e-05	0	2.77473e-05	6.53755e-05	1.25484e-06	0.000107925	0.000216888	0.000166376	0.000140746	3.4671e-06	3.62371e-05	0.000233903	0.000266157	103245
Matrisome-associated	ECM Regulators	Alpha-2-macroglobulin OS=Homo sapiens GN=A2M PE=1 SV=3	A2M	14	235.157	0	7.84973e-05	0.000414078	0.102067	0	4.82224e-05	0.000495128	3.18579e-05	4.97256e-05	0	0.000692259	2.52294e-05	9.91166e-06	7.97058e-05	0.000196167	0.000403072	0.000375648	0.00016091	0.000379179	0.000180374	0.000181569	0.000148424	0.00026251	0.00089868	0.000704166	0.000189284	0.000236934	7.74044e-05	7.75907e-05	5.41165e-05	7.34668e-05	0.000145488	1.48362e-05	163297
		Histone H2A type 2-B OS=Homo sapiens GN=HIST2H2AB PE=1 SV=3	HIST2H2AB	6	234.86	6.29894e-06	5.01597e-05	2.13026e-05	7.60196e-06	0.000345754	0.000248903	0.00037163	0.000236565	0.000523106	0.000811902	6.40393e-06	7.68495e-05	1.15563e-05	0.000536893	0.000458063	0.000214785	0.000519081	0.000161434	0.000112436	0.000254226	6.59768e-05	0	0.000111647	0.000125802	7.90272e-05	0.00104509	0.00120211	0.000374394	0.00100474	5.11125e-05	5.74839e-05	0.000289668	0.000210467	13994.4
		Thioredoxin-dependent peroxide reductase, mitochondrial OS=Homo sapiens GN=PRDX3 PE=1 SV=3	PRDX3	8	234.19	0	1.30486e-05	0.00013583	5.66239e-06	0	7.09719e-05	0.000210225	0.000351423	0.000139106	0	0	0.000205934	0.000239451	0.000593507	0.000528739	0.000441898	0.000421126	4.19495e-05	0.000123546	4.18286e-05	6.81741e-05	0	0.000166293	2.32011e-05	0.000185368	3.33865e-05	0.000306624	0.00015386	9.52434e-05	8.93241e-05	3.4285e-05	7.51855e-05	0.000107083	27692.2
		40S ribosomal protein S18 OS=Homo sapiens GN=RPS18 PE=1 SV=3	RPS18	8	233.99	0	1.11322e-05	0.000181396	0.000202998	0	0.000184982	8.26328e-05	0.000242816	0.000164261	0	8.46611e-05	0.000112011	8.5536e-05	0.000412995	0.000431501	0.000956614	0.000258008	0.000246183	9.86935e-05	0.000161031	0.000100462	0	6.38252e-05	0.000179696	0.000167237	0.000132619	0.00025598	0.000155515	0.00026017	1.77565e-06	0.000153249	0.000211322	0.000174443	17718.1
		60S acidic ribosomal protein P0-like OS=Homo sapiens GN=RPLP0P6 PE=5 SV=1	RPLP0P6	8	233.97	0	2.51911e-05	7.43098e-05	4.1214e-05	0	0.00010762	8.5551e-05	8.3311e-05	0.000113301	0	0	0.000103913	5.98166e-05	0.000342059	0.000587954	0.000521316	0.00042271	0.000289561	7.11952e-05	0.000262738	0.00024964	1.66923e-06	0.000190329	0.000226083	0.000454141	0.000342997	0.0003956	0.000325722	0.000487837	0.000115764	9.43523e-05	0.000397048	0.000254516	34364.8
		Isocitrate dehydrogenase [NADP] cytoplasmic OS=Homo sapiens GN=IDH1 PE=1 SV=2	IDH1	7	233.73	0	1.59907e-05	0.000308165	0	0.000207394	0.00021423	0.000263	5.57596e-05	0.00012619	0	0.00037084	7.97492e-05	5.23055e-05	9.19509e-05	5.3211e-05	9.23684e-05	7.26463e-05	1.2978e-05	1.70647e-05	6.01018e-06	1.13642e-05	1.61515e-05	9.9116e-05	0.000115861	5.18306e-05	2.79262e-05	1.13418e-05	2.32088e-05	0	0.000213279	6.68346e-06	3.32365e-06	5.38877e-06	46660.3
		Putative Ras-related protein Rab-1C OS=Homo sapiens GN=RAB1C PE=5 SV=2	RAB1C	6	233.37	0	2.81185e-05	6.35219e-05	6.3429e-06	0	2.45303e-05	5.61806e-05	5.7799e-05	2.21958e-05	2.22609e-06	7.56295e-07	0.000266173	3.69394e-05	0.00028665	0.000238866	0.00029678	0.0002485	8.56022e-05	5.79793e-05	4.78131e-05	6.34326e-05	0	9.61006e-05	2.7363e-06	3.87864e-05	3.02797e-05	0.000179846	0.000102835	9.60207e-05	2.5185e-05	4.93467e-05	0.000100054	8.31011e-05	22016.4
		Nucleoprotein TPR OS=Homo sapiens GN=TPR PE=1 SV=3	TPR	9	231.97	0	2.82155e-05	2.66624e-05	5.30079e-06	0	2.67735e-05	6.77354e-06	1.77406e-05	2.31265e-06	0	1.45334e-05	1.24336e-05	1.33244e-05	4.04196e-05	9.24744e-05	2.18829e-05	4.36755e-05	3.4509e-05	8.22541e-06	6.17515e-05	5.211e-05	0	3.63657e-05	7.61299e-06	3.94417e-06	1.56423e-06	2.66568e-05	3.99105e-05	4.68064e-05	5.40917e-06	7.70739e-06	1.76865e-05	1.8974e-05	267300
		60S ribosomal protein L12 OS=Homo sapiens GN=RPL12 PE=1 SV=1	RPL12	7	231.4	0	6.45246e-05	0.000268877	0	0	0.000341625	0.000687959	0.000417934	0.000448784	6.8223e-05	3.0201e-05	0.000178683	0.000226322	0.000314194	0.00060708	0.00120987	0.000381587	0.00045302	0.000169568	0.000437011	0.000601604	0	0.000620333	0.000318238	0.000703519	0.000436118	0.000489598	0.000402192	0.000615252	0.000406117	0.000325177	0.000453087	0.000413094	17817.8
		Catenin delta-1 OS=Homo sapiens GN=CTNND1 PE=1 SV=1	CTNND1	10	231.15	2.48592e-06	2.8024e-07	0	1.08785e-05	0	1.67996e-07	5.93733e-08	1.34813e-06	0	3.18602e-07	3.12845e-06	5.39637e-06	2.16389e-06	3.91779e-05	0.000145591	3.04274e-05	7.28747e-05	0.00026686	1.25144e-06	4.9601e-06	1.02482e-05	0	0	0.0003986	0	0.000150939	2.79565e-05	0.000105965	3.94936e-06	0	2.46743e-07	7.20087e-08	0	108174
		Redox-regulatory protein FAM213A OS=Homo sapiens GN=FAM213A PE=1 SV=3	FAM213A	5	230.57	0	2.09783e-05	4.64564e-05	2.67756e-05	0	1.91743e-05	0.000115504	3.91345e-05	9.28599e-05	0	2.80645e-05	0.000927604	7.29369e-05	3.29486e-05	6.00818e-05	5.08349e-05	3.59238e-05	2.15282e-05	5.69155e-05	5.36093e-05	0.000162325	4.9754e-08	0.000289692	4.57765e-05	0.000148226	0.000220377	7.45266e-05	8.51436e-05	8.72955e-05	6.396e-06	6.73057e-05	2.44681e-05	1.8881e-06	25764.3
Core matrisome	ECM Glycoproteins	Latent-transforming growth factor beta-binding protein 2 OS=Homo sapiens GN=LTBP2 PE=1 SV=3	LTBP2	7	230.03	7.32128e-07	1.71644e-06	7.04477e-05	0	0	2.6987e-07	0	8.70222e-07	1.36308e-06	0	4.03959e-06	3.60249e-06	4.907e-07	0.000174569	2.64121e-05	4.90283e-05	9.05213e-05	1.98757e-06	0	1.10479e-05	0	0.000384715	2.89113e-06	7.54387e-06	1.57375e-05	3.73965e-06	5.80871e-06	1.0738e-05	5.07287e-06	1.03962e-07	2.60002e-07	1.03709e-05	8.03164e-06	195049
		Keratin, type I cytoskeletal 15 OS=Homo sapiens GN=KRT15 PE=1 SV=3	KRT15	1	229.88	0	0	4.16025e-05	0	0	0.000311318	6.1203e-05	0.000188046	0.000158944	0	0.000138345	5.59291e-05	2.56821e-05	0.000360677	0.00153236	0.000490345	0.000138245	9.62795e-06	4.34691e-05	8.88633e-06	0.000101978	0	0.000143644	0	5.39642e-05	4.25701e-05	0.000164635	0.00035681	8.27557e-05	9.48939e-05	2.89533e-05	5.17346e-05	8.59472e-05	49212.3
		Delta(3,5)-Delta(2,4)-dienoyl-CoA isomerase, mitochondrial OS=Homo sapiens GN=ECH1 PE=1 SV=2	ECH1	7	229.71	0	5.38655e-06	6.18707e-05	7.28651e-06	0	6.95576e-06	0.000138594	1.3912e-06	0.000134276	1.73935e-06	9.48451e-06	4.07827e-05	3.24589e-05	4.40239e-05	0.000253446	8.6288e-05	4.87672e-05	2.1834e-05	1.31693e-05	7.80594e-06	3.21773e-05	0	7.7303e-05	2.31563e-05	1.90662e-06	8.70457e-06	1.6429e-05	3.19083e-05	6.01373e-05	5.25003e-05	2.78431e-05	5.1634e-05	2.27574e-05	35816.3
		Voltage-dependent anion-selective channel protein 3 OS=Homo sapiens GN=VDAC3 PE=1 SV=1	VDAC3	10	229.5	1.26108e-06	1.69707e-05	8.15164e-05	0.000142426	0	0.000168024	0.000783168	8.96434e-05	0.000617852	2.12149e-06	2.46493e-05	5.64291e-05	0.000123343	0.000174945	0.000898372	0.000406048	0.000597074	0.000129131	8.21129e-05	7.7187e-05	0.000135396	0	0.000124723	0.00020283	4.66255e-05	1.21155e-05	6.86391e-05	0.000184987	0.000186235	4.10701e-05	6.53263e-05	0.000109922	0.000223236	30658.8
		Superoxide dismutase [Mn], mitochondrial OS=Homo sapiens GN=SOD2 PE=1 SV=2	SOD2	8	228.99	0.00270532	5.8167e-05	0.000365449	0.00169243	0	6.41267e-05	7.65467e-05	1.88731e-05	6.29182e-06	2.24383e-06	0	1.92299e-05	5.33414e-06	0.000281412	0.00031839	0.000383668	0.000497989	8.02651e-05	0.000107018	4.65332e-05	6.63579e-05	2.36785e-06	0.000115006	0	3.08805e-06	7.84295e-05	0.000102548	4.97841e-05	8.22192e-05	4.4683e-05	4.08196e-05	8.64286e-05	5.25328e-05	24721.3
		Cofilin-1 OS=Homo sapiens GN=CFL1 PE=1 SV=3	CFL1	5	227.97	0	9.4903e-06	5.16256e-05	0	0	1.36427e-06	0	2.66959e-07	0	7.65116e-05	0	0	0	0.000564274	0.000392868	0.000462128	0.000306285	4.32544e-05	2.58015e-05	4.41387e-06	1.47173e-05	0	3.61607e-05	7.53726e-07	2.56484e-06	2.16658e-07	0.000100598	7.37186e-05	3.97394e-05	6.71102e-07	1.80616e-07	0.000126234	3.71519e-06	18502
		NADH-ubiquinone oxidoreductase 75 kDa subunit, mitochondrial OS=Homo sapiens GN=NDUFS1 PE=1 SV=3	NDUFS1	12	227.65	1.61288e-05	2.85365e-05	0.00015584	1.10359e-05	0	0.000143699	0.000107117	0.000153945	0.000290833	0	0.00016357	9.83724e-05	8.94307e-05	0.000153748	0.00025484	0.000104237	0.00018434	0.000102113	0.000172048	0.000112654	0.000267939	0.000101239	0.000352059	8.07122e-05	7.25554e-05	1.37606e-05	0.000211821	0.000123017	0.00030542	0.000261998	0.000160847	0.000142348	0.000143005	79470.3
		POTE ankyrin domain family member J OS=Homo sapiens GN=POTEJ PE=3 SV=1	POTEJ	4	227.631	0	0.00505336	0.0148937	0.00526979	1.00296e-05	0.000560735	5.13119e-05	3.32482e-05	0.000116096	0	5.07293e-07	0.000304652	7.72912e-05	0.012684	0.00438868	0.00569336	0.000721144	0.000349627	0.000475942	0.000803216	0.000379505	0	0.000225157	0.000616971	1.20857e-06	0.000957102	0.000197155	0.000220108	0.000922729	0.000166872	0.000133667	0.000835577	0.000585334	117393
		Guanine nucleotide-binding protein subunit beta-2-like 1 OS=Homo sapiens GN=GNB2L1 PE=1 SV=3	GNB2L1	9	227.27	0.000885981	3.01666e-05	7.69763e-05	2.53271e-05	0	0.000203256	0.000365723	0.00026533	0.000473495	0	1.60047e-05	7.96034e-05	0.00020172	0.000394629	0.000492846	0.000347386	0.00042519	0.000150912	0.00011696	0.000116752	0.000195979	0.000239302	0.000329448	0.000493551	1.95549e-05	0.000196848	0.000253234	0.000158942	0.00030325	0.000184281	0.000386556	0.000384589	0.000234644	35076.4
		3-ketoacyl-CoA thiolase, mitochondrial OS=Homo sapiens GN=ACAA2 PE=1 SV=2	ACAA2	11	227.26	0	0.000227976	0.00048844	0	0	7.17622e-05	0.000566518	0.00020551	0.000368803	0	0	0.000205095	6.98048e-05	0.000196032	0.000406615	0.000228031	0.000213478	0.000157033	7.31425e-05	0.000249135	0.000273354	1.01132e-06	0.000907402	0.000279679	0.000616842	9.98084e-05	0.000121986	0.000173666	0.000439355	0.000106341	9.29533e-05	0.000217388	0.000155202	41924.5
		Sodium/potassium-transporting ATPase subunit alpha-3 OS=Homo sapiens GN=ATP1A3 PE=1 SV=3	ATP1A3	5	227.05	0	1.33929e-05	6.31977e-05	0	0	7.41811e-05	0.000108762	0.000159908	0.000146614	0	9.7349e-05	0.00011712	0.000158869	0.000112401	0.000193056	0.000183155	0.000149889	8.42101e-05	3.68044e-05	3.48248e-05	9.4421e-05	1.59465e-06	0.000211773	4.39165e-05	0.000159324	3.37195e-05	9.11713e-05	0.000121157	9.72672e-05	0.000115492	6.38723e-05	0.000120965	7.76988e-05	111754
		Keratin, type II cytoskeletal 79 OS=Homo sapiens GN=KRT79 PE=1 SV=2	KRT79	5	225.547	0	0	9.44657e-06	0	0.00179945	0.000565796	5.86884e-05	0.000924181	0.000251785	4.54692e-06	0	0.000139518	5.31078e-05	0.000727137	0.00204942	0.000818152	0.000363543	0	4.29779e-05	0	0.000101845	9.52431e-07	0.000302428	0.0010768	0.000138372	7.61745e-05	0.00049953	0.000325434	3.37542e-06	0.000256654	7.04977e-05	7.18706e-05	0.000401558	57836.4
		2'-5'-oligoadenylate synthase 2 OS=Homo sapiens GN=OAS2 PE=1 SV=3	OAS2	4	225.02	0	1.41255e-06	0	0	0	0	0	7.94357e-06	5.0457e-07	0	0.0069462	7.80022e-06	9.08231e-07	1.35219e-06	3.17848e-05	3.80073e-06	6.14971e-05	9.52173e-07	8.93968e-07	1.75819e-06	0	0	4.53947e-07	0	0	0	8.60421e-06	1.97627e-06	1.10064e-06	0	1.57164e-06	0	1.12207e-05	82434
		Histone H3.1 OS=Homo sapiens GN=HIST1H3A PE=1 SV=2	HIST1H3A	1	225.01	0	0	0	0	0	0	0	0	0	0	0	0	0	0	4.96231e-06	5.75089e-07	1.15325e-07	0	0	0	0	0	0	0	0	0	0	0	0	0	0	0	0	15403.2
		T-complex protein 1 subunit delta OS=Homo sapiens GN=CCT4 PE=1 SV=4	CCT4	12	224.864	0	5.60882e-05	0.000150819	1.14733e-05	0	0.000151426	0.000330273	0.000177625	0.000296301	1.08564e-05	0.000310675	0.000636908	0.000322485	0.000298928	0.000604872	0.000235444	0.000519094	0.000129167	0.000104659	0.000120364	0.000167111	0	0.000382528	0.000108149	0.000441357	0.000144611	8.96615e-05	6.20679e-05	0.000195452	0.000376286	0.000244561	0.000216763	0.000336157	57926.8
Core matrisome	ECM Glycoproteins	Microfibrillar-associated protein 2 OS=Homo sapiens GN=MFAP2 PE=2 SV=1	MFAP2	7	223.69	0	0.000264709	0.000159491	0	0	0.0012651	0.000482588	0.000424794	0.000535771	9.5225e-05	7.80929e-05	3.98756e-05	1.39344e-05	0.000837337	0.000296596	2.06774e-05	0.000384211	0.000628658	0.000396115	0.00023403	0.000222918	0.00141794	2.67836e-05	8.54343e-06	2.11717e-05	0.00130029	0.0021251	0.00142957	0.000459919	0.000266298	0.000145375	0.000566917	0.000228262	20824
		Splicing factor 3B subunit 1 OS=Homo sapiens GN=SF3B1 PE=1 SV=3	SF3B1	7	223.31	1.64356e-05	6.52679e-06	9.76747e-06	0	0	0	2.07019e-06	1.86879e-07	3.88274e-06	0	0	6.62156e-07	0	3.45025e-05	0.00021717	7.34501e-05	0.000100118	2.34289e-05	8.28143e-08	8.04682e-06	3.5362e-06	0	2.95004e-06	2.45973e-06	4.3644e-07	5.13157e-07	2.90664e-05	4.43133e-05	2.95949e-05	0	1.05458e-05	2.27998e-05	4.08998e-05	145838
		2-oxoglutarate dehydrogenase, mitochondrial OS=Homo sapiens GN=OGDH PE=1 SV=3	OGDH	8	222.85	1.05847e-05	3.8154e-05	4.20195e-05	9.95229e-06	0	2.24566e-05	0.000133677	3.82951e-06	4.28635e-05	0	1.1591e-05	4.57462e-05	2.00936e-05	9.31217e-05	0.000225691	0.000129717	0.000111389	2.42072e-05	0.000128683	1.33436e-05	7.42761e-05	1.85497e-06	0.000179189	4.64906e-06	3.27174e-05	1.11017e-05	5.37399e-05	6.4267e-05	0.000110286	2.84349e-05	1.4584e-05	9.19693e-05	6.17273e-06	115939
		Palladin OS=Homo sapiens GN=PALLD PE=1 SV=3	PALLD	10	222.54	8.19852e-07	0	2.22839e-05	0	0	4.25102e-06	5.6248e-06	3.5008e-06	1.79935e-06	2.28559e-05	0	1.33237e-05	2.50271e-06	0.000298	3.41237e-05	0.000120391	0.000262152	5.39212e-06	3.11878e-07	8.26276e-06	1.1583e-06	0.00354094	0	1.49858e-05	1.65575e-06	1.5292e-05	1.65682e-05	5.33776e-05	1.48324e-05	0	4.35883e-07	1.07255e-05	0.000247104	150568
		Keratin, type II cytoskeletal 75 OS=Homo sapiens GN=KRT75 PE=1 SV=2	KRT75	4	221.98	3.36799e-06	4.03902e-05	8.25675e-05	4.62299e-06	0	0.000175001	0.000141096	0.000354854	2.47329e-06	0	8.85304e-05	0.000133479	1.17375e-06	0.000572518	0.00145247	0.000620948	8.30961e-06	2.01227e-05	1.9454e-05	6.61502e-07	4.79768e-05	6.96412e-06	2.05806e-05	6.93442e-05	1.70779e-06	1.86935e-05	5.64721e-05	3.33849e-05	4.96039e-05	8.36524e-05	1.39285e-05	5.30032e-06	1.40037e-05	59561.7
		Mast cell carboxypeptidase A OS=Homo sapiens GN=CPA3 PE=1 SV=2	CPA3	6	221.34	9.83876e-06	0.000457291	0.000418235	0	0	0.00095311	0.000468514	0.000764718	0.000202238	0	0.00194808	0.002258	0.000882325	2.20278e-05	6.4196e-05	1.55603e-05	6.56963e-06	0.000199699	0.00172645	0.000316505	0.0012865	5.39676e-05	0.0013936	0.000414414	0.00312208	0.000237626	1.53157e-05	0.000139724	0.000202818	0.000426659	0.000279593	0.000136634	8.28152e-05	48671.2
		AP-2 complex subunit beta OS=Homo sapiens GN=AP2B1 PE=1 SV=1	AP2B1	10	221.17	0	1.74855e-06	1.45402e-05	0	0	7.47688e-05	7.50104e-06	7.31621e-07	2.4751e-05	0	2.15889e-06	0	0	5.51011e-05	8.26841e-05	5.78472e-05	0.000132462	4.66226e-05	4.78098e-07	5.48173e-05	4.64054e-05	0	1.97365e-05	0	2.5943e-07	8.91656e-06	4.70741e-05	5.33632e-05	3.75199e-05	6.08218e-05	3.86527e-05	2.60904e-05	3.73341e-05	104558
		Histone H1.5 OS=Homo sapiens GN=HIST1H1B PE=1 SV=3	HIST1H1B	8	221.15	0	3.87953e-05	0.000374515	0	7.43981e-06	0.000682547	0.000663479	0.00156109	0.000706049	0	0.000974396	0.000453343	0.000487013	0.000565696	0.0027021	0.00257141	0.00374833	0.00247445	0.000399724	0.00097967	0.000694933	0	0.000412873	0.000676874	0.000696919	0.00159531	0.0012643	0.00194841	0.00332466	0.000544838	0.00192194	0.00182643	0.00447053	35354.1
		RuvB-like 1 OS=Homo sapiens GN=RUVBL1 PE=1 SV=1	RUVBL1	7	220.91	0	4.90433e-06	1.34707e-05	1.04886e-05	0	0	5.23085e-07	4.79086e-06	0	0.000106747	3.15165e-07	1.45886e-06	0	9.98034e-05	0.000206905	0.000111999	7.57928e-05	1.79567e-05	9.21397e-06	2.54696e-06	1.49794e-05	0	2.92201e-06	2.09159e-05	5.06228e-06	1.46615e-07	3.97169e-05	4.3849e-05	3.939e-05	1.79313e-06	0	4.77107e-05	1.52371e-05	50229.5
Matrisome-associated	ECM Regulators	Cathepsin G OS=Homo sapiens GN=CTSG PE=1 SV=2	CTSG	9	220.53	2.26191e-06	1.1879e-05	8.32706e-05	0.000714207	0	9.35366e-05	0.000409603	0.00120826	0.000133444	4.22584e-05	0.00243315	0.00108864	0.00272053	1.36243e-06	2.67038e-05	2.83644e-05	1.75092e-05	5.45398e-06	0.000332608	0.000134915	0.000397713	9.88881e-06	0.000444295	3.61858e-05	0.000920299	0.000182946	3.91801e-07	6.9884e-05	3.57125e-05	0.00137629	0.000766455	6.3773e-05	8.61516e-05	28836.6
		Histone H1.0 OS=Homo sapiens GN=H1F0 PE=1 SV=3	H1F0	5	220.52	0.000563422	0.000192307	0.000807144	0.00776571	2.17994e-06	0.00119118	0.000745634	0.000812151	0.00106269	0	4.53829e-08	6.83623e-06	0.00146809	0.00176471	0.00255507	0.00199947	0.000565095	0.000651079	0.000189968	0.000430456	0.000725689	1.29838e-07	0.00122887	0.00068056	3.90982e-05	0.000781343	0.000215205	0.000331335	0.00108167	4.23198e-05	0.00117355	0.00147574	0.000907094	20862.8
		Prolow-density lipoprotein receptor-related protein 1 OS=Homo sapiens GN=LRP1 PE=1 SV=2	LRP1	14	220.06	0.00368778	1.12635e-05	9.40947e-05	0.00420982	0	0.000104531	0.000314031	8.18387e-05	0.000324587	0	5.434e-05	0.000245649	4.661e-05	0.000187914	0.000225569	7.68212e-05	0.000243357	3.1231e-05	2.9412e-05	8.00174e-05	4.01645e-05	0	0.000261733	0.000574187	0.000137909	0.000596879	2.94118e-05	7.04963e-05	0.000195492	2.64421e-05	7.30382e-06	9.84817e-05	0.000347934	504615
		Citrate synthase, mitochondrial OS=Homo sapiens GN=CS PE=1 SV=2	CS	9	218.48	0	0.000257454	0.000373854	0	0	0.00121384	0.00105777	0.00130645	0.00298112	0	0.000597319	0.000637335	0.000557494	0.000255491	0.000628791	0.000350973	0.000746708	0.000142924	0.000242005	0.000361248	0.000602244	0.000246172	0.00115758	0.000434284	0.000516451	0.000327698	0.000378594	0.000497587	0.000733496	0.000393596	0.000271964	0.000465382	0.00017494	51713.8
		Eukaryotic translation initiation factor 5A-1 OS=Homo sapiens GN=EIF5A PE=1 SV=2	EIF5A	1	218.32	0	0	0	0	0	0	1.89849e-07	7.68991e-08	0	0	0	8.61419e-08	8.52824e-08	4.15251e-06	1.25781e-05	2.17848e-06	7.08167e-08	6.73339e-07	3.45933e-07	9.14335e-07	8.43783e-07	0	0	3.54728e-07	0	3.3366e-07	6.69252e-07	9.0371e-07	1.35459e-06	0	0	0	0	16831.3
		Lamina-associated polypeptide 2, isoforms beta/gamma OS=Homo sapiens GN=TMPO PE=1 SV=2	TMPO	7	218.22	0	8.71062e-06	2.97496e-05	5.33156e-06	0	4.71348e-07	0	3.04834e-07	3.86844e-07	0.000277578	3.9714e-07	5.05924e-05	0	0.000107971	0.000240624	6.77622e-05	0.000222961	2.28616e-05	4.06482e-05	9.0418e-06	3.46511e-05	4.27698e-07	4.57009e-05	7.11717e-06	8.24819e-06	5.38907e-05	2.78156e-05	0.000179628	8.46223e-05	7.20204e-05	3.17481e-05	0.000100291	0.000145601	50671.4
		Serum deprivation-response protein OS=Homo sapiens GN=SDPR PE=1 SV=3	SDPR	5	217.45	0	5.82655e-05	0.000195028	4.87648e-06	0	9.87923e-05	0.000638065	0.000207036	0.000318908	9.9171e-05	0.000188575	0.000412171	0.000213649	2.36493e-05	2.46852e-05	1.61232e-05	7.73326e-07	7.84273e-06	7.20515e-05	8.29063e-05	0.000214077	0	0.000309912	9.73835e-05	0.000376533	0.000221352	0.000130886	0.000107157	0.000123436	1.95912e-05	1.94261e-05	2.99653e-05	2.98911e-07	47172.9
		Aconitate hydratase, mitochondrial OS=Homo sapiens GN=ACO2 PE=1 SV=2	ACO2	13	216.92	0.000131248	1.18528e-05	0.000190734	0.000154076	0	1.83089e-05	0.000101255	5.74817e-06	0.000109165	1.82976e-05	3.59384e-05	6.77606e-05	1.05213e-05	0.000251916	0.000609288	0.000316984	0.000169755	1.99563e-05	2.17457e-05	2.69019e-05	3.60684e-05	1.65301e-06	0.000207649	0.000176457	2.62667e-05	0.000488711	7.36727e-05	0.000136556	0.000103703	6.45837e-05	2.37159e-05	8.89391e-05	3.36762e-05	85428.7
		Guanine nucleotide-binding protein G(I)/G(S)/G(T) subunit beta-1 OS=Homo sapiens GN=GNB1 PE=1 SV=3	GNB1	4	216.07	3.96162e-06	4.38316e-05	0.000206925	0.000833657	0	4.70348e-05	0.000155312	7.08262e-05	0.000157865	0.000827505	4.15069e-05	0.000321542	6.56954e-06	0.000227716	0.000243021	0.0001645	0.00011034	0.000228188	0.000109002	0.000115242	0.000182297	0.000191328	0.000281618	4.41349e-06	0.000267727	4.67686e-05	0.000185678	0.000199869	0.000195471	0.000152286	9.20627e-05	0.00022387	7.25492e-05	37376.7
		Peroxisomal multifunctional enzyme type 2 OS=Homo sapiens GN=HSD17B4 PE=1 SV=3	HSD17B4	5	215.53	0	0	7.37441e-07	1.58965e-05	0	4.49843e-06	1.21326e-05	5.75912e-06	1.76319e-05	0	7.46622e-07	4.52203e-06	3.63356e-07	3.87074e-05	0.000123927	4.43096e-05	6.01436e-05	5.53922e-06	2.34929e-06	7.67224e-06	1.2389e-06	0	2.29769e-06	7.99384e-06	0	7.45005e-07	4.44426e-05	1.26928e-05	2.2125e-05	2.08283e-06	0	1.31756e-05	5.83274e-06	79689.9
		Pyruvate dehydrogenase E1 component subunit beta, mitochondrial OS=Homo sapiens GN=PDHB PE=1 SV=3	PDHB	8	215.24	0	4.41842e-06	0.000100627	8.70288e-06	9.45578e-06	0.000195789	0.000404921	6.32186e-05	0.000552854	7.36474e-06	3.59345e-05	0.000126858	8.11635e-05	0.00020396	0.000218618	0.000207294	0.00016774	3.21566e-05	2.82472e-05	2.79527e-05	5.19335e-05	0	0.000175505	9.86371e-05	0.000473029	2.94877e-05	9.64144e-05	0.000112679	0.000111424	0.000120878	5.43154e-05	7.65576e-05	5.6023e-05	39233.5
		Rho GTPase-activating protein 1 OS=Homo sapiens GN=ARHGAP1 PE=1 SV=1	ARHGAP1	6	215.19	0	0	1.12018e-06	1.81911e-05	0	1.42345e-06	5.42978e-07	9.2228e-07	4.47437e-06	0	0	2.87379e-05	0	7.2129e-05	5.86637e-05	8.98322e-05	0.000124855	3.22752e-05	1.55555e-06	2.44499e-06	4.81608e-06	0	2.36751e-06	0	4.02357e-05	3.13431e-06	6.5292e-06	2.08801e-05	1.10853e-06	1.71815e-06	2.17646e-06	3.7489e-06	7.4519e-06	50437.7
		Lamina-associated polypeptide 2, isoform alpha OS=Homo sapiens GN=TMPO PE=1 SV=2	TMPO	3	214.56	0	0	0	0	0	2.05442e-06	3.29963e-06	3.7955e-06	0	1.64783e-05	0	0	6.66251e-07	2.7164e-05	0.000125638	1.62062e-05	4.81031e-05	0	0	0	0	0	2.06702e-06	6.45e-06	0	3.65222e-06	2.36229e-06	1.09893e-05	6.79499e-06	0	6.25759e-06	3.84697e-06	7.18608e-06	75494.4
		HLA class II histocompatibility antigen, DR alpha chain OS=Homo sapiens GN=HLA-DRA PE=1 SV=1	HLA-DRA	4	214.47	0	1.12788e-06	5.87569e-05	0	0	2.82179e-05	0.000102526	8.07153e-05	4.50294e-05	0	0	1.67813e-05	0	0.000209204	0.000133155	0.000120849	0.000197483	0.000250075	1.33672e-05	5.76437e-05	6.55426e-06	0	7.36637e-05	8.12676e-05	3.50418e-07	6.39895e-05	9.76986e-05	2.80142e-05	7.1807e-05	0	0.000100865	0.000365393	6.04343e-05	28606.7
		Histone H2A.J OS=Homo sapiens GN=H2AFJ PE=1 SV=1	H2AFJ	3	214.45	0	0.00469651	0.00454497	0	0	0.0279012	0.0209744	0.0101237	0.0327271	9.22327e-05	0.002098	0.0189215	0.000597829	0.0188621	0.0129235	0.00560624	0.00752684	0.0230439	0.00158417	0.0118127	0.00900243	0.000459803	0.0153341	0.00930293	0.00833839	0.0346167	0.0406885	0.0263947	0.0422848	0.00439752	0.0150743	0.032269	0.0152661	14018.6
		60S ribosomal protein L6 OS=Homo sapiens GN=RPL6 PE=1 SV=3	RPL6	10	214.43	0	6.8903e-05	0.00012847	0	0	0.000126924	0.000115239	0.000345428	0.000326875	0	0.000110798	0.000236608	0.000101609	0.000516884	0.000628186	0.000460629	0.000481067	0.000123259	8.7971e-05	0.000196078	4.60436e-05	4.79794e-06	0.000206959	0.000213108	0.000204859	4.59189e-05	0.000284957	0.000250851	0.000367924	0.000196547	0.000347984	0.000396078	0.000274375	32728.8
		Keratin, type II cytoskeletal 2 epidermal OS=Homo sapiens GN=KRT2 PE=1 SV=2	KRT2	5	212.94	7.87985e-07	0.000155868	0.000275006	0.000567925	0	6.49291e-05	0.000158228	2.84658e-05	6.1522e-05	0.000899541	0.000488613	0.000214601	4.10057e-05	8.57543e-05	9.08563e-05	0.000112204	6.62406e-05	2.15516e-05	0.000144648	9.27333e-06	0.000143477	0.000166867	5.56756e-05	5.11548e-05	7.52444e-05	6.38252e-05	1.55999e-05	2.99701e-05	0.000123311	9.22127e-05	6.38069e-05	1.7317e-05	5.16367e-05	65434.4
		Phosphoglycerate kinase 2 OS=Homo sapiens GN=PGK2 PE=1 SV=3	PGK2	7	211.63	0	4.28977e-05	0.000190235	0	0	3.05126e-05	4.99897e-05	2.39765e-05	0.000106975	0	2.80857e-05	0.000150368	3.07165e-05	0.000683715	0.000237598	0.00067406	0.000769257	0.000254233	2.26821e-05	9.38943e-05	3.93761e-05	0	0.00010955	9.94639e-06	0.000103601	0.000107272	0.000122275	0.000181726	7.99053e-05	0.000117164	5.61036e-05	0.000163652	0.000215938	44797.4
		Electron transfer flavoprotein subunit alpha, mitochondrial OS=Homo sapiens GN=ETFA PE=1 SV=1	ETFA	9	210.52	1.27985e-05	8.71778e-05	0.000249337	0	0	3.59584e-05	0.000269754	1.30529e-05	8.70906e-05	1.51927e-05	1.15075e-05	5.06694e-05	6.6825e-05	0.000270366	0.000188819	0.000177408	0.000159903	5.21053e-05	7.08916e-05	5.28132e-05	0.000126136	0	0.000236417	6.47473e-05	9.45589e-06	2.17759e-05	0.000113998	0.000100334	0.000139466	3.97118e-05	1.78213e-05	7.52065e-05	2.47975e-05	35080.1
		Alcohol dehydrogenase 1C OS=Homo sapiens GN=ADH1C PE=1 SV=2	ADH1C	9	210.44	0	0.00165856	0.00399718	0.00623121	0.00472353	0.00164478	0.00128089	0.00242834	0.00404301	0	0.00241874	0.00210882	0.00518674	0.000352985	0.000425212	0.000260316	1.8595e-05	2.69674e-05	0.000961422	0.000415144	0.000711105	7.35146e-05	0.00213438	0.000200607	0.00072152	0.000472235	9.62254e-05	0.000146211	0.000482354	0.00101726	0.00040165	0.000353617	0.000117067	39868
Matrisome-associated	ECM Regulators	Inter-alpha-trypsin inhibitor heavy chain H2 OS=Homo sapiens GN=ITIH2 PE=1 SV=2	ITIH2	10	209.73	0	7.40517e-05	0.000180716	0	0	0.000305372	9.98064e-05	0.000136458	0.000105246	1.47469e-05	7.01895e-05	0.000167602	3.80234e-05	0.000154912	0.000147521	0.000159923	0.000243602	0.000183853	0.000180717	0.000252023	0.000189721	5.07755e-05	0.000176031	0.000168132	0.000127018	0.000335838	9.26616e-05	0.000298927	0.00016504	8.48573e-05	0.000240117	0.000231087	0.000541079	106468
		Myeloid cell nuclear differentiation antigen OS=Homo sapiens GN=MNDA PE=1 SV=1	MNDA	3	209.29	0	1.0793e-06	7.30392e-06	0	0	0	4.02353e-06	6.67075e-05	0	0	0	4.03524e-05	8.76032e-05	7.00126e-06	1.43395e-05	1.19988e-05	1.93892e-05	9.81065e-06	5.42376e-05	1.13744e-05	3.16606e-05	0	1.79675e-05	3.04933e-06	8.88988e-06	0	1.79412e-06	1.31045e-05	1.19541e-05	2.01486e-05	5.31893e-05	2.00257e-05	2.65108e-06	45837.1
		FACT complex subunit SSRP1 OS=Homo sapiens GN=SSRP1 PE=1 SV=1	SSRP1	5	208.43	0	8.28609e-06	9.96675e-07	8.21914e-06	0	6.99977e-06	0	7.63796e-06	1.12571e-07	0	0	3.15818e-05	1.59854e-06	2.42262e-05	0.000204829	4.19437e-05	9.03092e-05	3.13932e-06	1.27161e-06	0	1.67411e-06	1.49911e-05	6.68447e-07	0	2.35677e-06	1.17778e-05	2.10117e-05	2.02647e-05	1.94963e-05	9.41894e-06	4.81199e-06	2.33184e-05	3.23968e-05	81077.8
		Heterogeneous nuclear ribonucleoprotein H2 OS=Homo sapiens GN=HNRNPH2 PE=1 SV=1	HNRNPH2	4	208.31	0	3.82504e-05	0	0	0	0	0	0	0	0	0	0	3.33841e-06	0.000122289	0.000140313	0.000114355	0.00011723	6.47923e-08	0	6.71513e-08	1.65489e-07	1.01543e-06	5.12932e-07	0	0	1.10464e-07	2.48667e-06	7.88562e-06	9.59341e-07	5.18881e-07	0	3.46231e-06	1.32873e-07	49263.7
		Dihydropyrimidinase-related protein 2 OS=Homo sapiens GN=DPYSL2 PE=1 SV=1	DPYSL2	7	207.33	0	2.04675e-05	0.00016975	0	0	0.000199935	0.00025604	0.000378638	0.000323081	0	0.000203916	0.000193457	0.000136693	0.000277703	0.000207379	0.00025764	0.00022293	4.41377e-05	8.88732e-05	0.000183085	0.000162595	0	0.000183407	0	0.00021561	0.000158429	4.93608e-05	4.10162e-05	0.000233058	0.0002037	0.000227333	0.000181374	0.00021366	62295
		Apoptosis-inducing factor 1, mitochondrial OS=Homo sapiens GN=AIFM1 PE=1 SV=1	AIFM1	8	207.08	0	1.94809e-06	3.56425e-05	0.00061287	0.000144828	8.76408e-05	3.09058e-05	1.69828e-07	3.54468e-05	1.52327e-06	5.28547e-06	0.000521307	6.75731e-06	0.000195956	0.000588028	0.000232317	0.000136343	2.29384e-05	1.13473e-05	1.2037e-05	6.3096e-06	0	6.54358e-05	1.52339e-05	0.00088039	3.12027e-06	6.44571e-05	4.03815e-05	4.42164e-05	0.000385508	1.7086e-07	2.84116e-05	3.09034e-05	66902.8
		Cytochrome b-c1 complex subunit 2, mitochondrial OS=Homo sapiens GN=UQCRC2 PE=1 SV=3	UQCRC2	9	206.867	0	4.4833e-05	0.000322169	1.48197e-05	0	7.3933e-05	0.000320979	0.000394797	0.000358238	0	0.000228387	0.000296945	0.000215177	0.000304168	0.000665033	0.000376786	0.00033728	6.20932e-05	3.23394e-05	0.000134774	0.000111759	0	0.000416899	6.34654e-05	6.68288e-05	6.25804e-05	8.97395e-05	0.000111862	0.000180488	9.35929e-05	6.94393e-05	0.000143277	7.75201e-05	48443.7
		Brain acid soluble protein 1 OS=Homo sapiens GN=BASP1 PE=1 SV=2	BASP1	5	206.45	0	2.18228e-06	1.4222e-05	0	6.89511e-06	0	0	0	0	0	0	0	0	0.000107292	8.54915e-05	0.000158013	2.10969e-06	2.03731e-06	3.23479e-07	7.84091e-07	2.79134e-07	0	0	0	0	1.05776e-07	4.37479e-07	1.15709e-06	5.52668e-07	0	0	8.97717e-07	4.80917e-07	22691.7
		Sarcoplasmic/endoplasmic reticulum calcium ATPase 1 OS=Homo sapiens GN=ATP2A1 PE=1 SV=1	ATP2A1	3	205.65	0	1.55957e-05	4.95822e-05	0	0	1.77321e-05	3.10761e-05	2.0045e-05	3.29187e-05	0	0	6.16771e-05	7.78981e-06	4.60634e-05	0.000120335	6.71008e-05	8.63741e-05	6.69831e-05	2.57814e-05	3.94913e-05	5.21053e-05	0	7.27936e-05	0	2.73432e-05	2.04294e-05	6.94103e-05	6.01002e-05	5.49207e-05	4.56245e-05	2.26937e-05	6.91506e-05	0.000103603	110258
		14-3-3 protein theta OS=Homo sapiens GN=YWHAQ PE=1 SV=1	YWHAQ	7	205.38	0	2.19348e-05	0.000137856	0.0427089	0.00101374	8.35665e-06	2.30169e-07	3.27836e-05	6.6205e-06	2.6573e-06	9.28531e-07	2.15793e-05	8.4828e-07	0.000227065	0.000160794	0.000274568	4.74957e-05	1.27432e-05	2.33206e-05	7.18546e-06	1.26499e-05	0.000536799	3.82515e-06	0	5.28292e-06	1.91024e-05	8.13888e-05	4.60034e-05	2.72482e-05	4.29369e-06	1.07648e-05	1.92118e-05	1.07529e-05	27764.1
		Reticulocalbin-1 OS=Homo sapiens GN=RCN1 PE=1 SV=1	RCN1	3	205.35	0	0	3.45053e-07	5.60263e-05	0	0	1.03095e-05	0.000356663	1.11318e-06	9.22021e-06	0	0	1.30408e-07	1.43604e-05	2.77297e-05	6.96672e-06	0.000129631	0	1.06724e-06	0	0	0	5.95514e-07	0	1.4673e-07	0	3.49269e-06	3.78516e-06	1.7508e-06	1.27599e-05	0	6.24436e-07	0	38890.3
		Monocyte differentiation antigen CD14 OS=Homo sapiens GN=CD14 PE=1 SV=2	CD14	6	205.19	0	3.73701e-06	1.94843e-05	0	0	1.1082e-05	1.33478e-05	6.95179e-05	0.00146869	0	0	0	5.78108e-07	6.65209e-05	0.000121247	6.22456e-05	0.000149826	0.000168449	8.3082e-05	3.06353e-05	4.80243e-05	0	1.62779e-05	0	3.0493e-06	0.000163716	0.000103934	3.2493e-05	6.1753e-05	2.87786e-06	1.62834e-06	7.74187e-05	3.16904e-06	40076.4
		Serum amyloid P-component OS=Homo sapiens GN=APCS PE=1 SV=2	APCS	6	204.78	1.50576e-06	0.000432807	0.001366	8.57775e-05	0	0.000960414	0.000486614	9.66314e-05	0.000531431	0.000310772	0.000683703	0.000510169	0.00132758	0.000120204	0.000130975	7.45838e-05	0.000256795	0.000386457	0.000456624	0.00240318	3.80778e-05	0.00185433	0.000217957	8.46405e-05	0.000964114	0.00062633	9.04324e-05	0.00079715	0.000495064	0.000137621	4.26144e-05	0.000246335	7.90294e-05	25387
Matrisome-associated	Secreted Factors	Protein S100-A11 OS=Homo sapiens GN=S100A11 PE=1 SV=2	S100A11	5	204.5	0	1.02384e-06	1.03357e-05	0	0	7.24362e-06	1.31108e-05	2.66407e-07	5.36385e-06	0	2.11659e-05	5.24333e-08	1.69526e-06	0.00122254	0.000806023	0.00120049	0.000406228	0.000317737	1.82322e-05	0.000268065	5.01695e-06	0	1.02684e-05	2.44342e-05	1.37846e-06	5.36053e-05	0.0001587	0.000383713	0.000125194	2.21613e-07	1.19152e-05	1.90622e-05	2.53396e-05	11739.4
Core matrisome	ECM Glycoproteins	Nephronectin OS=Homo sapiens GN=NPNT PE=2 SV=3	NPNT	5	204.28	3.58936e-06	8.80303e-05	0.000107762	7.45643e-06	0	0.00080356	1.38491e-05	5.10335e-05	0.000143916	0	0.000108179	3.61351e-05	5.37325e-05	5.91835e-05	9.06072e-06	6.50761e-06	3.50562e-06	0.000229431	3.91728e-06	5.89085e-05	1.26416e-05	0.00170765	3.08841e-05	3.46062e-06	5.30575e-05	8.78138e-06	7.90778e-05	4.31318e-05	3.17989e-05	1.26866e-05	9.52924e-07	0.000312698	2.69579e-05	61906.7
		40S ribosomal protein S8 OS=Homo sapiens GN=RPS8 PE=1 SV=2	RPS8	4	204.08	0	0.000394591	3.40124e-05	1.88804e-05	0	5.12597e-05	8.79473e-05	0.000102659	0.000214415	0	0	0.000128026	1.4417e-05	0.000187297	0.000257491	0.000266887	0.000116773	0.000135788	1.0798e-05	5.39305e-05	5.23901e-06	0	8.22344e-05	8.5911e-07	2.36477e-05	5.95186e-05	0.000137107	6.26908e-05	6.22721e-05	1.72443e-05	5.50219e-05	0.000136776	0.000146006	45627.3
		Transmembrane emp24 domain-containing protein 9 OS=Homo sapiens GN=TMED9 PE=1 SV=2	TMED9	6	203.67	0	2.94521e-07	4.14668e-05	3.32913e-05	0	4.47216e-05	0.000118495	0.000273277	0.000140082	0	9.12426e-05	0.000166104	0.000124492	0.000132564	0.000186919	0.000150217	0.000351063	5.14431e-05	2.7818e-05	5.29318e-05	7.58882e-05	0	0.000140162	8.9916e-05	0.000157444	1.90517e-05	1.4578e-06	0.000114757	6.07051e-05	0.000187382	0.000101851	5.2992e-05	0.000266706	27276.8
Matrisome-associated	ECM Regulators	Protein AMBP OS=Homo sapiens GN=AMBP PE=1 SV=1	AMBP	6	203.65	0	0.000195132	0.000383909	7.1819e-05	0	9.62655e-05	5.57969e-06	3.6129e-05	1.28996e-05	0	3.04267e-06	0.000159516	1.71885e-05	0.000122908	3.26871e-05	0.000100713	5.88286e-06	0.000196146	0.000149144	0.000537212	0.000109228	0.00133458	0.000397788	4.40262e-06	8.69786e-05	0.000132634	0.000230623	0.000197712	0.000114704	9.15752e-05	6.60626e-06	0.000270321	4.15922e-05	38999
		Peroxiredoxin-2 OS=Homo sapiens GN=PRDX2 PE=1 SV=5	PRDX2	8	202.8	0	0.000164112	0.000730952	0	5.20333e-05	0.000175193	0.00036117	0.00014789	0.000220212	0.000240586	0.000168942	0.000513562	0.000233152	0.00103054	0.000493191	0.00109456	0.000578357	0.000268187	0.000123218	0.000122067	0.000243214	0.000239431	0.000168242	0.000351283	0.000508243	0.000147578	0.000305943	0.000320435	0.000249808	0.000552803	0.000542389	0.000367384	0.000213066	21891.5
		Peroxiredoxin-6 OS=Homo sapiens GN=PRDX6 PE=1 SV=3	PRDX6	7	202.53	8.73594e-06	9.26035e-05	0.000220955	0.00111783	3.22244e-05	2.10177e-05	1.03087e-05	8.8193e-07	8.74244e-06	2.5229e-06	7.26373e-05	5.69996e-05	2.03826e-05	0.000500432	0.00020698	0.000406633	5.0122e-05	9.48334e-06	5.22213e-06	4.9569e-06	2.42866e-05	1.77989e-06	6.86913e-05	3.99847e-07	6.51373e-06	6.90476e-06	1.97775e-05	2.23229e-05	1.97694e-05	2.36883e-05	1.8931e-05	2.73214e-05	6.18333e-05	25035.1
		Elongation factor 1-alpha 2 OS=Homo sapiens GN=EEF1A2 PE=1 SV=1	EEF1A2	8	202.5	0	0.000574308	0.000897719	0	0	0.00125576	0.00158116	0.00106057	0.0019001	0.00074539	0.00150837	0.00191273	0.00105258	0.00168888	0.00234812	0.00221275	0.00201127	0.00128375	0.000626644	0.00119032	0.00088365	0.000664397	0.0011216	0.00242221	0.00164739	0.00110569	0.00139719	0.00183091	0.00250317	0.00225968	0.00138757	0.00151698	0.00292197	50471.2
		Protein PML OS=Homo sapiens GN=PML PE=1 SV=3	PML	6	202.14	0.000199403	5.07711e-07	6.9377e-05	1.50472e-05	0	6.23083e-05	0.000147294	8.82144e-05	0.000167755	2.15261e-06	7.92561e-05	0.000294413	0.000196589	0.00017457	0.000129811	0.000101373	3.72787e-05	0	4.96697e-05	3.03564e-05	0.000143677	0.009727	0.000114657	0.000878897	2.51688e-05	8.89327e-05	3.30151e-06	1.98111e-05	3.50608e-05	0.000134056	4.75166e-05	3.99865e-05	5.30589e-05	97552.3
		Heterogeneous nuclear ribonucleoprotein A3 OS=Homo sapiens GN=HNRNPA3 PE=1 SV=2	HNRNPA3	8	202.06	3.26601e-06	7.62099e-06	2.94583e-05	0.00187918	3.11397e-06	2.90746e-06	3.88815e-06	1.29116e-05	9.00812e-05	1.22639e-06	2.13156e-05	8.96343e-05	1.35781e-05	0.00032187	0.000679865	0.000136281	0.0001194	1.70796e-05	1.08893e-05	4.09464e-05	2.7498e-07	0	4.96386e-05	6.72437e-06	6.8778e-05	5.15777e-06	3.72897e-05	4.95714e-05	3.2198e-05	1.68706e-06	1.16146e-05	3.54758e-05	8.94061e-05	39594.4
		Histone H2A.Z OS=Homo sapiens GN=H2AFZ PE=1 SV=2	H2AFZ	6	201.49	8.87107e-06	0.00205986	0.00414531	0.000145801	0	0.0137453	0.015683	0.0143555	0.0165178	0	0.0139546	0.0138796	0.0149212	0.00710385	0.0158961	0.00997394	0.0142975	0.0123332	0.00287632	0.00532045	0.0083736	0.0013705	0.0112993	0.00460243	0.0133889	0.0107224	0.0125385	0.0175877	0.0213333	0.0102817	0.0140149	0.0087752	0.0116357	13551.7
		Rab GDP dissociation inhibitor beta OS=Homo sapiens GN=GDI2 PE=1 SV=2	GDI2	6	200.59	0	1.67854e-07	3.66579e-05	0	0	7.20282e-07	7.38529e-06	0.000589276	4.95882e-07	1.39482e-05	1.05074e-06	0	7.54955e-05	0.000121257	0.000159204	0.000203439	0.000114188	6.05547e-06	7.7914e-06	4.84543e-06	5.41405e-06	3.23691e-07	0	1.21455e-05	0.000396238	6.23727e-06	1.53915e-05	2.05144e-05	1.5821e-05	1.63049e-06	7.61201e-07	2.21372e-05	2.79957e-05	50665.4
		60S ribosomal protein L7a OS=Homo sapiens GN=RPL7A PE=1 SV=2	RPL7A	8	200.29	0	9.03499e-05	0.0002696	6.56579e-06	0	0.000504643	0.00053978	0.00013684	0.000462128	9.12754e-05	0.000116582	0.000284367	7.18997e-05	0.000348496	0.000582855	0.000554098	0.00052752	0.000529549	3.8236e-05	0.000495637	0.000180182	0	0.0005131	0.000255235	0.000228468	0.00017732	0.000552865	0.00048145	0.00039783	0.000279875	0.000248723	0.000616381	0.000491224	29995.9
		60S acidic ribosomal protein P2 OS=Homo sapiens GN=RPLP2 PE=1 SV=1	RPLP2	6	199.98	6.24848e-07	0.000116378	8.39784e-05	0	0	3.07856e-05	9.70612e-05	6.9151e-05	0.000119804	0	5.14939e-05	0.000142267	5.5734e-05	0.000737549	0.00105451	0.000697309	0.000554837	0.000577512	9.30277e-05	0.000333191	0.0002961	0	0.000328775	0.000408872	0.000112926	7.56959e-05	0.000548786	0.000491659	0.000789582	0.000110074	0.000287833	0.000754781	0.000560922	11663.9
		Amine oxidase [flavin-containing] A OS=Homo sapiens GN=MAOA PE=1 SV=1	MAOA	8	199.89	0	5.24335e-05	0.000214618	0	0	0.000172116	0.000969219	0.000339595	0.000488229	0	0.000404712	0.00056206	0.000539686	2.16615e-05	1.92966e-05	2.92858e-05	1.09387e-05	1.90127e-05	0.000165045	2.89369e-05	0.000300664	4.80723e-06	0.000713449	1.00792e-06	0.000567955	0.000105128	4.16139e-05	1.57457e-05	0.00015548	0.00054593	5.57596e-05	7.33656e-05	6.95317e-05	59683.2
		Antigen peptide transporter 1 OS=Homo sapiens GN=TAP1 PE=1 SV=2	TAP1	4	199.79	0	4.28326e-07	4.04557e-06	0	0	0	8.74694e-07	7.34259e-06	1.02956e-05	0	0	4.89817e-06	0	8.27262e-06	6.01908e-05	2.93656e-05	0.000145076	1.46207e-05	1.38986e-05	4.11065e-06	3.37442e-05	0	7.70534e-06	0	8.56115e-07	1.53159e-06	3.41589e-05	3.28501e-05	4.42664e-05	0	0	3.13939e-05	6.50595e-06	87221.3
		Cysteine and glycine-rich protein 1 OS=Homo sapiens GN=CSRP1 PE=1 SV=3	CSRP1	8	199.4	0	7.73113e-05	0.000288471	5.91985e-06	0.00161503	4.37166e-05	9.27445e-05	1.19729e-06	0.000163214	0.000425388	0	2.55153e-05	1.65633e-05	0.000287398	0.000184216	0.000134365	0.000372655	2.45539e-05	6.80281e-06	4.14876e-05	2.34129e-06	2.42228e-05	2.93124e-05	7.44002e-05	3.86799e-05	8.21621e-05	9.12783e-05	6.12823e-05	5.52867e-05	9.97124e-06	1.12513e-05	5.98092e-05	0.000579593	20565.7
Matrisome-associated	ECM Regulators	Matrix metalloproteinase-9 OS=Homo sapiens GN=MMP9 PE=1 SV=3	MMP9	6	199.05	0	2.11889e-06	3.32987e-06	3.90686e-06	0	0	0.000468816	2.97938e-06	1.65219e-05	0	2.99461e-05	1.68666e-05	6.61545e-05	0	3.69743e-06	1.08881e-06	3.85592e-06	0	3.32532e-05	9.01738e-06	4.34119e-05	0	2.47129e-05	0	0.000244895	7.97093e-07	4.13611e-07	0	1.35449e-06	1.41343e-05	2.0563e-05	1.25044e-06	3.29727e-07	78460.2
Core matrisome	Collagens	Collagen alpha-2(V) chain OS=Homo sapiens GN=COL5A2 PE=1 SV=3	COL5A2	10	198.99	8.57043e-06	0.000487913	0.000330444	0.00103638	0.000168653	4.11401e-05	4.09967e-06	0.000257981	9.67241e-05	0.000457311	0.00104731	0.000328759	0.000200393	0.000687119	0.00016381	0.000306522	0.00040883	0.000677127	0.000998259	0.00085337	0.00091086	0.000888844	0.00036862	0.00119684	0.000223356	0.000239495	0.000738441	0.000738592	0.000457135	0.000776734	0.000703501	0.000362758	0.000722791	144912
		Argininosuccinate synthase OS=Homo sapiens GN=ASS1 PE=1 SV=2	ASS1	6	197.93	0	5.41176e-07	6.63995e-05	0	0	3.49934e-05	4.83877e-05	1.45512e-05	4.11327e-07	0	1.00871e-05	1.73849e-05	3.75075e-05	0.00011196	8.73251e-05	0.000182249	0.000113786	0	0	7.40773e-07	2.09381e-07	0	5.80863e-07	4.74617e-06	2.04297e-05	9.03565e-06	1.68631e-05	1.34637e-05	1.50352e-06	2.23172e-05	5.85521e-06	6.47538e-08	1.65376e-05	46531.3
		Ras GTPase-activating-like protein IQGAP2 OS=Homo sapiens GN=IQGAP2 PE=1 SV=4	IQGAP2	5	195.35	0	1.8546e-06	4.08673e-05	9.38648e-06	0	3.20674e-05	4.45661e-05	6.87759e-06	6.00103e-05	1.6287e-06	0	0	0	2.33071e-05	3.79692e-05	3.68411e-05	7.1854e-05	0.000149873	8.04057e-06	3.31748e-05	3.35827e-06	0	5.05739e-05	7.76896e-05	0	2.81805e-05	9.97978e-05	1.4307e-05	6.17512e-05	0	3.78822e-05	0.000136464	4.81444e-05	180589
		Putative beta-actin-like protein 3 OS=Homo sapiens GN=POTEKP PE=5 SV=1	POTEKP	6	195.21	0	0.00317938	0.00534638	9.74096e-06	1.34792e-05	0.0060692	0.00602974	0.00530086	0.00233257	6.69177e-06	0.00213184	0.00146093	0.00257504	0.0195195	0.00944059	0.0129407	0.0185198	0.00234624	0.00233845	0.00224365	0.00189576	1.96809e-05	0.00181697	0.000272653	0.00772729	0.00153579	0.00561143	0.00606164	0.00343292	0.00612474	0.00178972	0.00237747	0.00698411	42016.6
		Band 3 anion transport protein OS=Homo sapiens GN=SLC4A1 PE=1 SV=3	SLC4A1	8	195.05	7.33443e-06	8.04364e-06	8.09764e-05	4.35995e-05	0	6.80331e-05	0.00025445	5.00404e-05	0.000100012	4.88007e-07	7.33445e-05	0.000782493	0.000339911	7.24529e-06	0.00011407	0.000234553	9.74626e-06	7.48744e-06	0.000221836	5.09609e-05	0.000416172	0	0.000175861	4.18464e-06	0.000855596	8.41176e-05	6.1986e-05	9.02033e-05	0.000126034	0.000311041	0.000600408	5.98275e-05	0.000180182	101798
Core matrisome	ECM Glycoproteins	Osteopontin OS=Homo sapiens GN=SPP1 PE=1 SV=1	SPP1	4	194.8	7.57851e-06	0	0	0.000101193	1.87947e-05	0	0	0	0	0.000494064	0	1.00733e-06	0	1.62851e-07	1.71993e-06	5.55662e-05	1.54118e-06	0.000473553	1.33737e-07	6.94655e-05	0	0.00215713	4.52777e-07	2.32976e-06	3.49531e-05	0	2.82641e-06	0.000361778	2.01109e-06	0	5.00292e-08	2.191e-06	1.33495e-07	35421.9
		Keratin, type I cytoskeletal 13 OS=Homo sapiens GN=KRT13 PE=1 SV=4	KRT13	3	194.63	0	1.57796e-07	3.64189e-05	6.99172e-06	0	0.000356654	3.41426e-05	0.000245946	0.000182696	0	2.60308e-05	6.0058e-05	2.15131e-05	0.000431698	0.00193982	0.000523805	0.000189445	0	2.13895e-05	0	7.24218e-05	0	0.000226758	0.00026968	2.89131e-05	0	0.000119998	0.000169402	6.47822e-05	0	0	0	9.04198e-05	49588.8
		Retinal dehydrogenase 1 OS=Homo sapiens GN=ALDH1A1 PE=1 SV=2	ALDH1A1	7	194.29	2.04033e-06	2.49294e-05	0.000115905	0.000725512	0	4.32042e-06	0.000129004	3.82721e-05	4.48497e-05	2.37902e-05	3.91952e-05	3.9209e-05	7.27856e-05	6.51492e-05	2.9886e-05	1.61894e-05	2.25841e-06	1.92047e-05	8.43211e-06	1.31308e-06	7.46092e-06	0	2.07217e-05	0	1.36042e-06	3.68767e-06	2.68339e-05	1.34914e-05	7.69175e-06	8.62342e-06	2.26416e-06	1.54708e-05	9.11624e-07	54863.3
		Ankyrin-1 OS=Homo sapiens GN=ANK1 PE=1 SV=3	ANK1	6	193.18	0	3.16042e-06	1.56783e-05	1.45217e-05	0	0	1.13168e-05	3.25412e-06	1.24089e-06	0	0	0.000195712	9.35067e-06	5.47998e-07	7.88003e-07	2.78089e-05	7.66273e-07	4.16105e-06	4.61299e-05	1.82882e-05	0.000110644	0	5.82761e-05	0	0.000135237	1.37912e-05	1.35497e-05	2.07184e-05	3.05997e-05	5.46238e-05	0.0001314	1.96532e-05	6.37735e-05	206272
		Atlastin-3 OS=Homo sapiens GN=ATL3 PE=1 SV=1	ATL3	2	192.95	0	1.20369e-05	0.000240913	0	0	0.000117905	0.00076893	0.000641235	0.00111324	0	1.05676e-05	5.29921e-06	2.94347e-05	7.77014e-05	6.85935e-05	0.000126455	4.33676e-05	2.79505e-05	0.000509312	0.000295383	0.000483111	0	7.47603e-05	5.14127e-06	7.37371e-05	0	2.50488e-05	3.24988e-05	3.71426e-05	3.32781e-06	3.99344e-06	4.30273e-05	0.000262676	60543.7
		Plasma membrane calcium-transporting ATPase 4 OS=Homo sapiens GN=ATP2B4 PE=1 SV=2	ATP2B4	5	192.87	0	3.58927e-06	1.97415e-05	0	0	4.31973e-07	0.000102441	4.39594e-05	8.50484e-05	1.00385e-06	2.99337e-05	0.000114015	8.94937e-05	4.94699e-05	0.000112543	5.42101e-05	6.55998e-05	2.46854e-05	1.45902e-05	1.72178e-05	3.12528e-05	0	0.000145625	8.65817e-07	0.000106061	0	4.44594e-05	3.27009e-05	1.64345e-05	6.316e-05	2.95039e-05	3.65321e-05	1.07099e-05	137928
		Methylmalonate-semialdehyde dehydrogenase [acylating], mitochondrial OS=Homo sapiens GN=ALDH6A1 PE=1 SV=2	ALDH6A1	8	192.05	0.000208574	8.03547e-06	9.78259e-05	0.000271571	0	9.72032e-05	0.000210114	9.11312e-05	0.000171601	0.00331912	4.07081e-05	0.000126369	3.39878e-05	3.38866e-05	0.000188442	4.84742e-05	7.26335e-06	3.3703e-05	5.90081e-06	1.10091e-05	1.39287e-05	0	0.00014711	7.82946e-06	9.15782e-05	3.03839e-07	3.43037e-05	9.85816e-05	9.80113e-05	5.1473e-05	1.92326e-05	2.39296e-05	1.65427e-05	57841.1
		Putative heat shock 70 kDa protein 7 OS=Homo sapiens GN=HSPA7 PE=5 SV=2	HSPA7	3	191.66	1.51869e-06	8.09488e-05	0.000688566	3.52332e-06	0	4.88515e-05	5.69996e-05	0.000620654	6.34182e-05	5.24522e-06	3.69258e-06	0.00298579	2.9757e-05	0.000823348	0.000776914	0.000764903	0.000188347	1.15504e-05	0.00252815	0.00455268	0.00193024	0	0.00107167	1.61827e-06	8.05333e-05	0.000412604	9.25462e-05	0.000132271	2.34865e-05	0.000617761	0.00141169	6.39394e-05	0.0010813	40244.6
		Heterogeneous nuclear ribonucleoprotein H OS=Homo sapiens GN=HNRNPH1 PE=1 SV=4	HNRNPH1	6	191.65	1.42231e-06	5.86741e-06	3.18178e-05	5.37406e-06	0	2.9579e-06	8.75548e-07	3.47903e-06	1.22598e-05	1.99906e-06	3.31527e-06	9.11886e-06	1.27079e-07	0.000342571	0.000648001	0.000455538	0.000198274	1.67275e-05	0	5.76675e-06	1.23027e-06	3.21717e-05	1.40126e-05	1.84721e-06	7.11826e-06	3.02788e-06	7.37393e-05	0.000105528	7.96989e-05	7.23075e-07	6.69622e-06	7.26377e-05	7.46562e-05	49229.6
		Translationally-controlled tumor protein OS=Homo sapiens GN=TPT1 PE=1 SV=1	TPT1	2	191.32	0	0	0	2.8066e-05	0	0	0	0	0	0	0	0	0	5.29205e-05	5.14229e-05	3.27979e-05	4.09835e-05	0	0	0	0	0	0	0	0	0	0	4.24609e-07	0	0	0	0	0	19594.7
		10 kDa heat shock protein, mitochondrial OS=Homo sapiens GN=HSPE1 PE=1 SV=2	HS	5	191.29	0	5.09476e-07	4.47763e-05	0	0	7.14285e-05	6.9239e-05	7.09092e-06	6.76001e-05	0	0	7.29466e-05	2.03087e-05	0.000479148	0.00130397	0.000441402	0.000580144	1.74805e-05	1.5433e-05	0.0092625	3.1578e-05	2.95064e-06	5.62701e-05	0.0035265	2.65841e-05	9.22841e-06	3.62089e-05	6.26566e-05	6.82602e-05	3.01913e-05	1.23449e-05	0.000112343	0.000494168	10930.6
		Transferrin receptor protein 1 OS=Homo sapiens GN=TFRC PE=1 SV=2	TFRC	6	190.97	0	1.32952e-05	1.22537e-06	0	0	5.27569e-06	3.46078e-07	1.47655e-06	6.95656e-06	5.77125e-05	1.76298e-05	3.3105e-06	1.15173e-05	4.3561e-06	7.58205e-06	3.15783e-05	8.85129e-05	8.13366e-06	4.20384e-06	1.8235e-06	0	0.000190744	0	2.16477e-06	1.05379e-05	1.12249e-06	9.43164e-06	2.39989e-06	7.01502e-07	2.67453e-07	0	8.01041e-08	7.94265e-06	84875.1
		HLA class I histocompatibility antigen, B-44 alpha chain OS=Homo sapiens GN=HLA-B PE=1 SV=1	HLA-B	1	190.87	0	0	0	0	0	0	0	0	0	0	0	0	0	0	0	0	1.36144e-06	0	0	0	0	0	0	0	0	0	0	0	0	0	0	0	0	40480.7
		60S ribosomal protein L10 OS=Homo sapiens GN=RPL10 PE=1 SV=4	RPL10	5	190.71	0	1.34012e-06	1.84131e-05	0	0	4.70819e-05	6.23072e-05	0	2.53882e-05	2.10073e-05	2.39267e-06	0	0	0.000160542	0.000214985	0.000190767	0.000205236	6.596e-05	3.64249e-06	2.86953e-05	1.70715e-05	0.00276365	3.01051e-05	0	3.63878e-05	1.01957e-05	0.000148717	0.000112348	0.000108975	0	0	9.81488e-05	4.20299e-05	24603.4
		ATP synthase subunit gamma, mitochondrial OS=Homo sapiens GN=ATP5C1 PE=1 SV=1	ATP5C1	5	189.37	0	7.7663e-06	0.000119004	0	7.82153e-06	2.64601e-05	0.000125445	8.36288e-05	0.000140281	0	3.01292e-05	7.07547e-05	4.39039e-05	9.56632e-05	0.000592232	0.000132024	7.85707e-05	9.10596e-08	6.20904e-06	2.1618e-05	4.52134e-05	0	2.26926e-05	0	0.000117363	2.34557e-05	3.55231e-06	6.6256e-05	6.90053e-05	2.15328e-05	5.75575e-05	1.09521e-05	6.95981e-05	32997
		CD81 antigen OS=Homo sapiens GN=CD81 PE=1 SV=1	CD81	5	188.61	0	4.9285e-05	0.000270587	8.39797e-06	0	0	0.00164502	2.71574e-05	0.0013191	0	3.57738e-07	0.000180551	6.93457e-05	0.000403528	0.000508545	0.00029106	0.000356457	9.7664e-05	0.000681286	0.000336017	0.000677057	0	0.000720566	0.000209624	2.29282e-05	0.000154901	0.000295803	0.000210168	0.000406541	1.87079e-05	0.000112719	0.000241239	4.26474e-05	25809.3
		Erlin-2 OS=Homo sapiens GN=ERLIN2 PE=1 SV=1	ERLIN2	7	188.22	9.47658e-06	2.76948e-05	7.0346e-05	1.23155e-05	0	6.17133e-05	0.000146347	3.99698e-05	0.000160224	5.4783e-05	2.3554e-05	0.000211825	8.99913e-05	0.00014953	0.000265783	7.39207e-05	8.37247e-05	0.000100538	9.61677e-05	0.000139703	0.000232028	0	0.000229878	0	0.000167502	5.13927e-05	0.000191922	0.000171934	0.00016135	8.6572e-05	5.05721e-05	7.49472e-05	5.29672e-05	37840.1
Matrisome-associated	ECM Regulators	Plasminogen OS=Homo sapiens GN=PLG PE=1 SV=2	PLG	6	187.44	0	3.32795e-06	2.35526e-05	0	0	2.06489e-06	4.38951e-06	0	0	3.63707e-05	0	2.44575e-05	1.47824e-06	7.47308e-05	0.000167314	0.000177625	7.55149e-05	7.94376e-05	4.0387e-05	3.87495e-05	5.75906e-05	3.0504e-06	7.43708e-05	0	0	2.27424e-05	3.88771e-05	0.000127121	6.99948e-05	1.46802e-05	1.6666e-05	0.000127066	2.56776e-05	90568.4
		60S ribosomal protein L5 OS=Homo sapiens GN=RPL5 PE=1 SV=3	RPL5	5	187.16	4.53437e-07	6.95754e-06	7.23344e-05	0	7.36282e-06	4.06004e-06	2.0098e-05	2.19479e-05	2.10542e-05	0.000166688	0	6.97488e-05	6.61306e-06	0.000113498	0.000186766	0.000156121	0.000244568	0.000169503	5.56301e-06	5.75163e-05	4.78224e-05	0	0.000130033	0	0	6.0062e-05	0.000206881	0.000120115	0.000120437	8.91017e-05	9.53474e-05	0.000110623	6.95755e-05	34362.9
		Pre-mRNA-processing factor 19 OS=Homo sapiens GN=PRPF19 PE=1 SV=1	PRPF19	6	187.02	1.12252e-06	3.78548e-07	6.49725e-06	5.9963e-06	0	4.22854e-06	2.74568e-06	6.25083e-07	3.48405e-06	0	2.41882e-06	2.43332e-05	0	8.1287e-05	0.000242377	0.000141627	0.000147197	8.30364e-05	5.71419e-06	4.95623e-05	5.19358e-05	0	1.55072e-05	1.3124e-05	0.000279644	3.44363e-05	6.34711e-05	0.0001135	7.4388e-05	8.19154e-07	8.62311e-07	6.74481e-05	1.58646e-05	55181.8
		Ig alpha-2 chain C region OS=Homo sapiens GN=IGHA2 PE=1 SV=3	IGHA2	8	185.27	0	9.01826e-05	0.000836066	8.89143e-05	0.000322984	0.000128918	0.000640373	8.57672e-05	0.000147975	0	7.2848e-05	0.000267972	2.89039e-05	0.000432076	0.000103182	0.000864595	0.000345829	0.000723	0.000251918	0.000180878	0.000122722	9.69871e-05	0.000293693	0.00016553	0.000117904	0.000236184	0.000281155	0.000357474	0.000235279	6.04531e-05	9.28894e-05	0.000181387	0.000139347	36525.1
		Phosphoglycerate mutase 1 OS=Homo sapiens GN=PGAM1 PE=1 SV=2	PGAM1	4	185.15	4.24078e-06	0.000138519	0.000126167	0	5.573e-06	0	0.000248199	0	2.88879e-05	0	0	2.52734e-05	0	0.000230109	4.88602e-05	0.000201606	2.61622e-05	6.19594e-06	0	7.0418e-07	1.07561e-05	0	2.989e-06	0	1.05979e-05	0	1.89603e-06	0	4.64967e-06	1.23448e-06	0	9.06016e-06	4.19307e-06	28803.7
		Adenylyl cyclase-associated protein 1 OS=Homo sapiens GN=CAP1 PE=1 SV=5	CAP1	7	184.667	0	7.3018e-05	0.00027134	1.11014e-05	0	3.47675e-05	1.24864e-05	0	5.89652e-06	1.43128e-05	0	2.03344e-05	2.12552e-05	0.000267644	9.1397e-05	0.000290653	0.000122124	8.48866e-05	2.49882e-05	2.77712e-05	4.70266e-05	0	4.94794e-05	1.64526e-05	7.14746e-05	0	4.47903e-05	4.71129e-05	3.63664e-05	0	4.05407e-06	8.35394e-05	0.000139389	51902.2
		Poly(rC)-binding protein 2 OS=Homo sapiens GN=PCBP2 PE=1 SV=1	PCBP2	3	184.59	0	7.64245e-06	2.15859e-05	5.51313e-06	0	0	0	0	0	0	0	0	0	0.000153353	0.000221729	0.000215428	0.000116119	9.46395e-05	5.46585e-06	2.63815e-05	5.75136e-05	9.80805e-06	9.25273e-06	0	2.66729e-08	1.93607e-06	0.000148147	0.000147958	0.000146367	0	0	0.000106774	4.93685e-05	38580.3
		Desmoglein-2 OS=Homo sapiens GN=DSG2 PE=1 SV=2	DSG2	7	184.26	0	5.26627e-05	8.51998e-07	9.33856e-06	0	0	2.1632e-07	1.99729e-07	1.15546e-06	0	0	1.32177e-05	5.7911e-07	5.31238e-05	0.00020867	0.000247437	1.59516e-05	4.86647e-06	1.08817e-05	5.98852e-06	9.64588e-06	0	1.07445e-05	0	1.3171e-05	3.88526e-07	9.1616e-06	7.53958e-06	6.00902e-06	1.26409e-06	2.89663e-06	1.12121e-05	9.25298e-06	122298
		Scaffold attachment factor B1 OS=Homo sapiens GN=SAFB PE=1 SV=4	SAFB	2	184.13	0	0	4.69855e-07	0	0	0	0	0	0	0	0	0	0	0	2.68379e-05	3.33642e-06	1.00919e-05	0	0	0	0	0	0	1.31133e-06	0	0	0	1.70678e-06	0	0	0	0	0	102643
		Putative pre-mRNA-splicing factor ATP-dependent RNA helicase DHX15 OS=Homo sapiens GN=DHX15 PE=1 SV=2	DHX15	8	184.11	0	1.78753e-05	7.02891e-06	0	0	2.95567e-06	3.29985e-06	8.44851e-06	6.56404e-07	0	4.74355e-06	3.4535e-06	2.56277e-05	8.7646e-05	0.000280963	0.000108984	0.000140633	3.56044e-05	4.75856e-05	3.10883e-05	6.39e-05	9.30987e-06	0	7.04723e-06	3.83805e-06	1.63825e-05	4.51238e-05	6.87407e-05	1.85443e-05	3.66907e-06	2.51336e-05	1.95947e-05	1.44504e-05	90936.2
		Immunoglobulin lambda-like polypeptide 5 OS=Homo sapiens GN=IGLL5 PE=2 SV=2	IGLL5	4	183.82	0	8.94343e-05	0.000501279	0	0	4.37859e-05	0.000275175	1.53216e-05	7.37703e-05	0	1.7792e-05	0.00015211	4.24126e-07	0.000327161	0.000259431	0.00087697	0.00021222	0.000458613	4.96622e-05	0.000382218	4.0733e-05	0	0.000152702	0.00010107	0.000258077	5.84233e-05	0.000445436	9.39115e-05	7.33088e-05	7.63136e-06	9.93983e-05	6.85102e-05	0.000212001	23062
		60S ribosomal protein L7 OS=Homo sapiens GN=RPL7 PE=1 SV=1	RPL7	9	183.2	3.19069e-06	6.39652e-05	0.000111197	2.64003e-06	1.99906e-06	0.000450866	0.000369551	0.000290498	0.000433963	0.000941182	0.00010876	0.000214122	6.82757e-05	0.000168964	0.000301008	0.000251145	0.000390079	0.000302486	5.07929e-05	0.000239678	0.000157396	8.34395e-06	0.000269351	0.000367215	0.000202718	0.000215235	0.000302393	0.000335189	0.000361234	0.000311989	0.000314257	0.000320562	0.000315743	29226.6
		DNA topoisomerase 2-beta OS=Homo sapiens GN=TOP2B PE=1 SV=3	TOP2B	3	182.7	0	0	7.4141e-07	0	0	0	0	0	8.56042e-07	0	0	0	0	2.3159e-05	0.000133774	3.49062e-05	3.1682e-05	3.95535e-06	2.87816e-07	8.75066e-05	1.52627e-06	0	5.73922e-07	4.97058e-07	0	0	1.14097e-05	1.58457e-06	1.5667e-05	0	0	9.97119e-06	6.28686e-06	183278
		Eukaryotic translation initiation factor 4 gamma 1 OS=Homo sapiens GN=EIF4G1 PE=1 SV=4	EIF4G1	4	182.65	9.65289e-05	0	1.0922e-06	6.72009e-06	0	9.87005e-05	3.15339e-07	1.7523e-06	1.05272e-05	3.10815e-06	1.02425e-06	0	0	8.28698e-06	1.10059e-05	1.45355e-05	3.89304e-05	4.9258e-07	1.55452e-05	1.81261e-05	2.04902e-05	0	0	3.66059e-07	1.75224e-07	1.79684e-06	1.22352e-06	0	3.03348e-06	0	0	8.95035e-07	6.16996e-07	175498
		Histone H2A.x OS=Homo sapiens GN=H2AFX PE=1 SV=2	H2AFX	2	182.51	0	0	0	0	0	0	1.78671e-06	0	0	0.000967667	8.34331e-05	0	0	0	0	0	0.000646797	0	0	0	0	0	0	0	0	0	0	0	0	0	0	0	0	15143.7
		AP-2 complex subunit alpha-1 OS=Homo sapiens GN=AP2A1 PE=1 SV=3	AP2A1	3	182.36	0	0	7.39083e-07	0	0	0	5.6849e-07	0	0	7.77785e-06	0	0	0	2.06836e-05	3.06536e-05	1.77766e-05	3.79986e-05	5.54609e-07	0	1.89467e-07	1.08997e-06	0	1.62354e-06	7.68987e-06	0	0	2.0736e-06	0	2.02701e-06	0	0	0	2.47229e-07	107551
		Coatomer subunit gamma-1 OS=Homo sapiens GN=COPG1 PE=1 SV=1	COPG1	6	182.14	0	9.85839e-07	1.61216e-05	0.00012005	0	5.06048e-08	0	7.17195e-05	1.78162e-05	0	1.28301e-06	5.94237e-05	2.13665e-05	5.62824e-05	9.52738e-05	6.92618e-05	7.57471e-05	2.41698e-05	5.73705e-06	1.32478e-05	8.54734e-06	0	1.2544e-06	2.53194e-06	6.75322e-07	4.53358e-06	3.96293e-05	3.10463e-05	5.58126e-05	1.86682e-05	1.15045e-05	1.82531e-05	2.21704e-05	97721.7
		Putative high mobility group protein B1-like 1 OS=Homo sapiens GN=HMGB1P1 PE=5 SV=1	HMGB1P1	5	182.04	0	0	4.10433e-05	7.772e-07	0	0.000230043	0.000189132	9.37476e-05	0.000405287	1.17582e-05	0.000402449	0.000310787	9.56051e-05	0.000294038	0.000956296	0.000438737	0.000938061	0.000240373	5.48406e-05	4.61723e-05	3.73805e-05	0	0.000148422	8.3356e-05	0.000120954	0.000181042	0.000362956	0.000411338	0.000475112	0.000231458	0.000104938	0.000417359	0.000176078	24237.1
		Cullin-associated NEDD8-dissociated protein 1 OS=Homo sapiens GN=CAND1 PE=1 SV=2	CAND1	8	182.01	4.53716e-05	9.83818e-06	3.76544e-05	7.01007e-06	0	4.60908e-06	3.72405e-06	6.82641e-07	2.69393e-05	0	1.26513e-06	1.53536e-06	0	8.41092e-05	7.86471e-05	0.000119013	9.81308e-05	1.64128e-05	1.25618e-06	2.17452e-06	5.80752e-06	0	1.08562e-05	1.55651e-06	1.01902e-06	0	1.864e-05	3.39698e-05	3.35765e-05	3.18243e-07	0	1.30121e-05	7.15089e-06	136384
		Prenylcysteine oxidase 1 OS=Homo sapiens GN=PCYOX1 PE=1 SV=3	PCYOX1	7	181.3	0	3.83146e-06	0.000243949	4.70195e-05	0	9.65452e-05	0.000458588	0.000275334	0.000319537	0	9.14346e-05	0.000329059	0.000332707	8.34325e-05	0.000115785	9.43108e-05	7.25545e-05	5.02011e-05	0.00017215	0.000108619	0.000283366	0	0.000322301	0.000152782	0.000572365	3.23808e-05	6.9924e-05	0.000130861	0.00011211	0.000260914	7.8514e-05	8.6314e-05	9.70622e-05	56642.3
		WD repeat-containing protein 1 OS=Homo sapiens GN=WDR1 PE=1 SV=4	WDR1	3	180.85	0	7.7488e-06	3.25751e-05	5.23401e-05	0	0.000151477	7.44383e-07	0	3.66314e-06	0.00015507	3.77979e-06	5.81499e-06	0	5.98328e-05	2.24514e-05	0.000121064	3.34372e-05	1.89033e-05	0	0	0	0	0	0	0	0	2.81724e-05	2.09943e-05	6.52635e-06	0	0	1.28394e-05	5.78668e-06	66194.8
		Superoxide dismutase [Cu-Zn] OS=Homo sapiens GN=SOD1 PE=1 SV=2	SOD1	3	180.71	0	7.98256e-06	3.88174e-05	0	0	1.39475e-05	0	1.33701e-05	3.24182e-06	0	0	1.85862e-06	1.76579e-05	0.000266689	0.000200164	0.000104476	3.8431e-05	5.06027e-05	4.11118e-05	4.41856e-05	1.79494e-05	9.65401e-07	3.64879e-05	0	0.000341954	7.04772e-06	7.2222e-05	4.38477e-05	3.28303e-05	2.24483e-06	7.09707e-06	3.47133e-05	2.45142e-05	15934.2
Core matrisome	ECM Glycoproteins	Fibulin-5 OS=Homo sapiens GN=FBLN5 PE=1 SV=1	FBLN5	6	180.51	1.99918e-06	0	7.3192e-05	2.48037e-06	1.07492e-05	4.86538e-05	7.81985e-06	2.56302e-05	2.48528e-05	0.000143956	0	0.000197665	4.88164e-05	0.000133162	0.000245035	3.94425e-05	1.78663e-05	3.68294e-05	4.48767e-05	0.000302253	7.8656e-06	7.96563e-05	6.71189e-05	5.97964e-05	0.000135926	9.67874e-05	8.70325e-05	0.000203522	9.83547e-05	1.72206e-05	0.000114122	0.000421576	7.6123e-05	50179.5
		Prothymosin alpha OS=Homo sapiens GN=PTMA PE=1 SV=2	PTMA	4	179.56	0	6.22856e-06	1.72899e-05	0	0	1.54497e-07	0	3.2412e-06	1.62947e-07	0	0	9.25827e-08	0	5.91211e-05	0.000102989	3.1116e-05	1.645e-06	8.28772e-06	1.67858e-05	4.34414e-06	1.21003e-05	0	1.16854e-05	0	0	5.31079e-06	1.59063e-05	6.34156e-06	1.28967e-05	1.29522e-06	4.27384e-06	1.96668e-06	3.86496e-07	12200.8
		Septin-11 OS=Homo sapiens GN=SEPT11 PE=1 SV=3	2011-09-01	5	179.39	0.000575339	6.84965e-06	1.79346e-05	0.000228892	0	1.63311e-05	6.1475e-05	2.56675e-06	0.000247843	0	6.01324e-05	5.60981e-05	0	0.000209949	0.000108047	0.000128072	9.6531e-05	0	0	1.88424e-05	2.55569e-06	2.99061e-06	3.98474e-05	0	7.61092e-05	1.11422e-05	7.48895e-06	6.25156e-06	7.14192e-05	2.99401e-05	3.59512e-05	2.30751e-06	0.000153176	49399
		Synaptic vesicle membrane protein VAT-1 homolog OS=Homo sapiens GN=VAT1 PE=1 SV=2	VAT1	8	179.337	3.13762e-05	3.80319e-05	0.000194187	2.72615e-05	0	9.1141e-05	0.000124583	0.000168531	0.00010355	0	5.23479e-05	6.39864e-05	0.00026672	0.000255575	0.000279213	0.000147246	0.000112757	0.000400231	0.000186945	0.000224883	0.000203972	0	0.000424099	0.000191045	2.20719e-07	0.000106166	0.000282823	0.000208656	0.000203417	0.000224412	0.000190563	0.000386274	0.000110924	41920.3
Core matrisome	Collagens	Collagen alpha-1(V) chain OS=Homo sapiens GN=COL5A1 PE=1 SV=3	COL5A1	5	179.23	0	8.0096e-05	2.17672e-05	4.03443e-06	0	0	0	1.54304e-06	3.73705e-07	2.96275e-06	0	2.96804e-06	0	0.000340994	0.000105871	0.000161518	0.000376919	0.000498513	6.71589e-05	0.000481884	0.000354393	0.000836808	0.00010903	0.00272001	3.50981e-06	9.36285e-05	0.000605472	0.000504781	0.000628545	0.000114409	0.000157507	0.00043801	0.000352212	183566
		ATP-citrate synthase OS=Homo sapiens GN=ACLY PE=1 SV=3	ACLY	4	178.77	9.28793e-06	1.28071e-06	1.06106e-05	0.00016674	0	0	3.78056e-07	4.52586e-07	0	0	0	2.83354e-07	5.33755e-07	1.75955e-05	2.23487e-05	3.82194e-05	2.26421e-05	3.43656e-05	3.37717e-06	4.08272e-06	1.15303e-05	0	8.82671e-07	0	2.74513e-07	0	3.04355e-05	5.01036e-05	3.45993e-05	0	0	1.57964e-05	1.87283e-06	120845
		Fermitin family homolog 2 OS=Homo sapiens GN=FERMT2 PE=1 SV=1	FERMT2	8	178.17	0	3.65896e-05	0.000137904	6.08173e-05	0.00297043	2.79131e-05	0.000207303	5.41225e-05	0.000244478	0.000747978	0.000111778	0.000177435	0.000500102	9.44406e-05	7.45059e-05	7.45691e-05	9.92229e-05	5.02365e-06	6.52683e-05	2.96042e-05	4.01303e-05	0	0.000165464	6.50465e-05	0.000214312	7.33463e-05	7.13869e-05	4.86097e-05	4.8299e-05	3.72598e-05	2.20623e-05	2.94084e-05	4.77076e-05	77864
		Serine/threonine-protein phosphatase 2A 65 kDa regulatory subunit A alpha isoform OS=Homo sapiens GN=PPP2R1A PE=1 SV=4	PPP2R1A	5	178.07	4.83893e-06	4.94656e-06	5.93998e-05	0	0	1.26124e-06	2.43666e-06	0	1.90184e-05	0	0	1.35743e-06	1.62648e-05	0.000147148	0.000111771	0.00016881	8.96014e-05	1.00465e-05	9.28169e-06	3.81733e-06	1.67787e-05	0	1.01998e-05	6.23486e-06	8.13729e-06	4.66829e-06	1.90928e-05	1.59812e-05	1.52811e-05	5.94756e-07	2.55379e-06	3.78726e-05	2.52618e-05	65311.1
Matrisome-associated	ECM Regulators	Inter-alpha-trypsin inhibitor heavy chain H1 OS=Homo sapiens GN=ITIH1 PE=1 SV=3	ITIH1	7	177.98	0	1.58737e-05	6.99058e-05	0	0	1.66764e-05	0.000139559	4.95598e-05	7.54406e-05	3.02839e-05	7.53235e-05	0.000218518	4.3055e-05	0.000160682	7.44598e-05	0.000135132	0.000174754	4.28807e-05	5.39412e-05	0.000168271	0.000101615	0.000284481	0.000124775	0.000169572	0.000216441	0.00040528	2.97313e-05	0.000353844	0.000115075	0.000210752	0.000324689	9.72613e-05	0.000400176	101393
		Fatty acid-binding protein, adipocyte OS=Homo sapiens GN=FABP4 PE=1 SV=3	FABP4	5	177.39	3.10198e-07	0	0.000746612	0.00124499	0	4.11376e-05	0.000358706	4.44716e-05	0.00029417	0	0.000880471	0.000242021	0.000235463	0.00011665	1.35555e-05	0.000339973	1.43749e-05	7.35464e-07	5.94385e-05	1.17635e-05	6.54742e-05	0	0.000266274	0.000212077	0.000417102	2.13309e-05	6.27181e-07	7.31451e-06	9.95716e-06	0.0002397	4.69864e-05	6.23399e-06	0	14717.8
		B-cell receptor-associated protein 31 OS=Homo sapiens GN=BCAP31 PE=1 SV=3	BCAP31	5	177.33	0	4.60445e-06	0.000533041	8.88636e-05	9.37794e-06	0.000699205	0.00120014	0.000828853	0.00110731	0	0.000354067	0.00109583	0.000646066	0.000302258	0.000356473	0.000277983	0.00042765	0.000505201	0.00147572	0.000413956	0.000353993	1.60771e-06	0.000633472	0.00017156	0.000836734	0.000696654	0.000153605	0.000306118	0.000340751	0.000190315	0.000185245	0.000198658	0.00025781	27991.9
		3-hydroxyacyl-CoA dehydrogenase type-2 OS=Homo sapiens GN=HSD17B10 PE=1 SV=3	HSD17B10	9	177.03	0	3.25933e-05	0.000116285	0	0	4.22578e-05	2.57583e-05	1.67563e-05	7.23979e-06	5.8694e-07	6.11605e-06	6.23281e-05	1.77347e-05	0.000359836	0.00022965	0.000311093	0.000183251	5.03567e-05	1.88762e-05	1.59081e-05	3.78442e-05	0	0.000100214	4.44913e-05	8.11909e-06	1.15795e-05	0.000181579	8.24597e-05	8.56665e-05	1.87862e-05	6.72831e-06	5.34694e-05	6.90599e-05	26922.8
		40S ribosomal protein S3a OS=Homo sapiens GN=RPS3A PE=1 SV=2	RPS3A	7	176.08	1.8159e-06	1.06934e-05	5.31928e-06	2.78422e-05	0	4.10196e-05	3.93323e-05	3.96299e-05	1.50772e-06	6.66832e-06	8.91535e-07	0	7.38186e-07	0.000103601	0.000255323	0.00014908	0.000164945	6.33256e-06	3.01718e-07	1.02571e-05	5.5007e-07	1.65532e-06	1.28596e-06	4.35636e-06	2.53629e-05	3.87028e-06	1.30932e-05	1.88347e-05	5.58851e-05	2.71214e-05	3.37137e-05	1.3449e-05	2.10639e-07	29944.9
		Acid ceramidase OS=Homo sapiens GN=ASAH1 PE=1 SV=5	ASAH1	3	175.85	0	5.85939e-07	4.60344e-07	0	0	1.36274e-05	1.17889e-05	8.59408e-06	7.11881e-06	0	0	1.61889e-06	2.33359e-06	7.26137e-05	0.000118477	5.06587e-05	6.35018e-05	8.02239e-05	3.39936e-06	3.54896e-05	3.74566e-06	7.64842e-05	1.10634e-06	1.75987e-06	4.83558e-07	5.55832e-07	0.000232442	4.04149e-05	3.26014e-05	7.71342e-07	6.76024e-07	4.20286e-05	7.94e-07	44660.9
		Neutral alpha-glucosidase AB OS=Homo sapiens GN=GANAB PE=1 SV=3	GANAB	7	175.77	4.18914e-07	0	3.54885e-05	1.56564e-06	0	2.24291e-06	0.000294551	0.000133487	0.0004034	0	5.78485e-07	6.78401e-05	0.000165953	9.54221e-05	0.00024205	0.000208855	4.38559e-05	1.77013e-05	8.66867e-06	6.36507e-06	2.04938e-05	1.5934e-07	1.38418e-05	3.26554e-06	0.000104686	3.78713e-05	1.22402e-05	2.04811e-05	1.33714e-05	3.64784e-05	1.81571e-05	1.49837e-05	2.56955e-05	106878
		Actin-related protein 2/3 complex subunit 2 OS=Homo sapiens GN=ARPC2 PE=1 SV=1	ARPC2	10	175.25	1.96648e-05	1.20434e-05	8.18969e-05	0.000110447	0	0.000109914	9.54783e-05	0.000606226	0.000168288	0.00041734	8.35088e-05	0.000133509	0.000180236	0.000183317	0.000222583	0.000180804	0.000423136	0.000149849	6.31445e-05	0.000123325	0.000102816	6.56056e-06	7.95414e-05	0.000105614	0.000482214	7.7119e-05	0.000147317	0.000132895	0.00023591	0.000165376	0.000149991	0.000165497	0.000253808	34333.3
		40S ribosomal protein S19 OS=Homo sapiens GN=RPS19 PE=1 SV=2	RPS19	5	174.48	0	0	5.26858e-05	0	0	0.000266437	0.000303948	0.000321917	0.000351295	0	0.000191473	0.000140116	0.000306916	0.000294805	0.00032896	0.000271918	0.000303435	0.000205758	7.20939e-05	0.000129406	0.000157322	0	0.000189772	9.8928e-05	0.000397233	0.000185869	0.00018856	0.000189971	0.000374906	9.92962e-05	0.000248981	0.000464407	0.000199715	16059.4
		Elongation factor 1-beta OS=Homo sapiens GN=EEF1B2 PE=1 SV=3	EEF1B2	5	174.37	0	6.7979e-06	3.16219e-07	0	0	9.04243e-07	1.56698e-05	1.68059e-05	0.0001311	0.000607172	3.803e-06	5.68481e-05	2.88862e-05	0.000327911	0.000204605	0.000285787	0.000432059	2.70431e-05	2.63338e-05	8.7274e-06	1.21163e-05	5.96216e-07	5.12205e-05	1.34526e-05	6.27029e-05	9.7617e-06	9.44242e-05	0.00010989	8.17838e-05	8.30133e-05	1.77632e-05	7.66817e-05	0.000131422	24763.4
		Peripherin OS=Homo sapiens GN=PRPH PE=1 SV=2	PRPH	2	174.35	0	0.000566539	0.000258947	7.98763e-05	0	0.000947767	0.00208113	0.0016438	0.00177236	0.000424251	0.000843278	0.00351741	0.00225677	0.00251147	0.00142843	0.00147193	0.0015903	0.000927799	0.000567747	0.00105156	0.000750475	4.57662e-06	0.000752867	0.000356287	0.000627576	0.000737181	0.00257065	0.00185392	0.00156196	0.00295507	0.00216937	0.00113009	0.000795079	53651.6
		60S ribosomal protein L4 OS=Homo sapiens GN=RPL4 PE=1 SV=5	RPL4	11	173.3	0	0.00281574	0.000751169	4.45062e-06	0.000278735	0.00721437	0.000137335	0.00422534	0.000377636	1.36102e-06	2.65374e-05	0.00249281	0.00710137	0.00527064	0.00214648	0.00159772	0.0126639	0.000912863	0.00148616	0.00047219	0.000522917	0	0.000940881	0.00414697	0.000242053	0.00486304	0.00123302	0.000565196	0.00151994	8.17918e-05	0.000211246	0.000913905	0.000592817	47698.8
		Poly(rC)-binding protein 1 OS=Homo sapiens GN=PCBP1 PE=1 SV=2	PCBP1	6	173.05	1.0006e-06	6.91174e-05	0.000178852	2.66637e-05	0	0.000856788	9.78734e-05	4.68721e-05	0.000131246	0	0.000138987	7.99949e-05	1.13626e-05	0.000388088	0.000620807	0.000360801	0.000440577	0.000186763	2.92424e-05	7.42385e-05	6.14795e-05	0	9.28271e-05	2.2412e-05	3.74897e-05	8.1826e-05	0.00013012	0.000226589	0.000221856	3.71076e-05	7.85484e-05	0.000216536	0.000298776	37497.6
		Sideroflexin-1 OS=Homo sapiens GN=SFXN1 PE=1 SV=4	SFXN1	4	172.95	1.00177e-05	1.26814e-06	2.05726e-06	3.60401e-05	0	1.61384e-06	1.97039e-06	8.95849e-06	0	0	9.24288e-06	1.53865e-05	9.69777e-06	2.55913e-05	0.000141135	7.56161e-05	5.34638e-05	9.25911e-06	4.71933e-06	3.14136e-06	3.68489e-06	0	1.1977e-05	0	4.11673e-06	0	2.14427e-05	3.48816e-05	2.06943e-05	1.02591e-05	0	7.47078e-06	3.41574e-06	35619.5
		Transcription intermediary factor 1-beta OS=Homo sapiens GN=TRIM28 PE=1 SV=5	TRIM28	8	172.46	0	5.80532e-06	4.09717e-05	8.53562e-06	0	0	3.15999e-06	1.32241e-06	8.59604e-06	0	7.64238e-06	1.40671e-05	4.07796e-06	0.000118256	0.000207894	0.000107706	0.000160079	6.51742e-06	1.14492e-07	1.21266e-06	7.78896e-07	0	7.02831e-06	0	1.11923e-05	1.01268e-05	1.03468e-05	4.72239e-05	7.52444e-06	1.28447e-07	7.49684e-06	8.8266e-06	0.000280781	88550.3
		Lon protease homolog, mitochondrial OS=Homo sapiens GN=LONP1 PE=1 SV=2	LONP1	3	172.11	0	0	1.04554e-06	0	0	0	0	7.25533e-07	0	0	0	0	0	2.00769e-05	6.9663e-05	2.3095e-05	7.9633e-06	0	0	0	0	0	1.14418e-07	5.9656e-07	0	4.93425e-08	4.96565e-06	1.39774e-06	4.92353e-06	0	0	0	8.48098e-07	106494
		Malignant T-cell-amplified sequence 1 OS=Homo sapiens GN=MCTS1 PE=1 SV=1	MCTS1	2	171.58	0	2.42329e-07	1.54692e-07	0	0	0	0	0	0	0	0	0	0	8.2261e-06	1.58071e-05	9.00489e-06	3.9178e-05	7.88313e-06	0	8.75561e-07	0	0	8.90264e-06	0	0	1.29383e-07	1.09373e-05	7.36232e-06	7.28682e-06	0	0	1.03324e-05	1.72395e-06	20554.7
Core matrisome	Collagens	Collagen alpha-1(IV) chain OS=Homo sapiens GN=COL4A1 PE=1 SV=3	COL4A1	8	170.8	0	0.000895417	0.0012201	0.00189701	0.00115018	4.30537e-06	1.43471e-06	8.65174e-06	3.20053e-06	0	0	2.96865e-05	3.58925e-05	4.99092e-05	0.000120818	0.000112658	2.94249e-06	8.17502e-06	4.12534e-05	5.53553e-05	7.03537e-05	5.55129e-06	7.64344e-05	0	9.51705e-07	1.54157e-05	1.47842e-05	2.32853e-05	1.40645e-05	5.41848e-06	6.97587e-06	1.08434e-05	8.1945e-06	160620
		Prostacyclin synthase OS=Homo sapiens GN=PTGIS PE=1 SV=1	PTGIS	7	170.16	0	2.21443e-06	3.09537e-05	8.5626e-06	0	5.46568e-05	0.000114055	0.000123826	0.000147855	0	1.112e-05	6.17713e-06	2.00674e-05	0.000108909	8.96156e-05	0.000260667	0.000261958	0.000112539	6.05148e-05	5.28801e-05	5.86352e-05	0	0.000114513	0.000195728	6.47789e-05	3.84359e-05	0.000164238	0.000200324	0.000143511	0.000132375	3.46074e-06	0.000152766	6.97844e-05	57106.5
		Serine/arginine-rich splicing factor 1 OS=Homo sapiens GN=SRSF1 PE=1 SV=2	SRSF1	7	169.88	0	0	1.22807e-06	5.27679e-05	0	5.16042e-05	1.89274e-06	4.22431e-05	1.46133e-05	0	1.66332e-06	1.07942e-05	3.57611e-05	0.000256586	0.000589224	0.000188714	0.00013303	7.36327e-05	7.87491e-05	4.35139e-06	2.15916e-06	8.76294e-07	1.74291e-05	4.40183e-05	3.79176e-05	3.60752e-05	8.91556e-05	0.000358152	0.000125958	3.43591e-05	5.75957e-05	9.38106e-05	3.13614e-05	27744.2
		Actin-related protein 3 OS=Homo sapiens GN=ACTR3 PE=1 SV=3	ACTR3	6	169.79	6.26708e-05	8.8757e-06	2.18295e-05	9.1714e-06	0	1.07148e-05	4.78382e-05	2.88379e-05	3.67993e-05	0	3.93339e-05	8.02664e-05	4.9469e-05	0.000197558	0.00018794	0.000154485	0.000257401	4.66434e-05	5.44319e-05	4.91609e-05	2.5212e-05	1.38562e-06	1.88352e-05	0.000160807	6.1222e-05	1.60198e-05	0.000116548	7.75641e-05	0.000104542	4.12592e-05	6.39748e-05	8.59954e-05	0.000108896	47372
		Chymase OS=Homo sapiens GN=CMA1 PE=1 SV=1	CMA1	6	169.63	1.04283e-05	0.000164627	9.86911e-05	0	0	0.000209166	0.000579255	0.00110111	0.000426537	0	0.000764426	0.00131526	0.000686409	6.48882e-06	1.72123e-05	6.471e-07	1.58176e-05	3.97814e-05	0.000849066	3.05225e-05	0.000217346	0	0.00077202	9.27037e-06	0.00196328	3.3801e-05	4.57239e-06	2.80929e-05	4.31803e-05	0.000326201	0.000146946	9.14354e-07	1.93357e-06	27324.4
		Heterogeneous nuclear ribonucleoprotein C-like 1 OS=Homo sapiens GN=HNRNPCL1 PE=1 SV=1	HNRNPCL1	4	169.59	0	6.3133e-06	3.59089e-05	0	0	8.1103e-05	5.45174e-05	7.76035e-05	5.98999e-05	0	0	1.01288e-05	2.08653e-05	0.000343083	0.000640121	0.000340713	0.000346276	2.46046e-05	3.52353e-05	4.99636e-05	9.83621e-05	0	1.73458e-05	0	0	0.000171635	0.000126845	8.68292e-05	0.000324559	0	0.000147937	0.000156511	0.000164835	32142.1
		Polyubiquitin-C OS=Homo sapiens GN=UBC PE=1 SV=3	UBC	4	168.618	1.40997e-05	0.000893463	0.0012919	4.72767e-05	0	0.00074505	0.00102114	0.000783739	0.0014238	0	0.000533391	0.00110157	0.000755318	0.00269154	0.00207286	0.00174299	0.00124933	0.000373396	0.000775755	0.000745201	0.00133762	0	0.00133259	0.000179066	0.00089039	0.000406004	0.000329489	0.000558715	0.000914107	0.00102464	0.000810836	0.00118122	0.000841966	77043
		HLA class I histocompatibility antigen, B-48 alpha chain OS=Homo sapiens GN=HLA-B PE=1 SV=1	HLA-B	1	168.35	0	0	1.01581e-07	1.48996e-05	0	0	0	0	0	0	0	0	0	2.29746e-07	0	0	5.30284e-05	0	0	0	1.2564e-06	0	0	1.4074e-05	0	0	3.73394e-07	0	0	0	0	0	0	40361.4
		Malate dehydrogenase, cytoplasmic OS=Homo sapiens GN=MDH1 PE=1 SV=4	MDH1	6	168.11	0	1.46898e-05	0.000358459	0.000481001	0	0.000107108	9.66664e-06	1.24489e-06	0.000183072	0	9.48559e-06	2.42078e-05	1.88657e-06	0.000179246	8.54078e-05	0.000216325	2.22493e-05	7.07208e-06	0	2.263e-06	0	0	4.32528e-05	3.30093e-05	1.81913e-05	1.60372e-06	7.12516e-06	1.49968e-05	0	7.8124e-06	1.71242e-06	8.94529e-06	0	36427
		L-lactate dehydrogenase B chain OS=Homo sapiens GN=LDHB PE=1 SV=2	LDHB	8	167.04	0	0.000281021	0.000556201	0.00035594	0	8.37426e-07	5.12057e-05	1.55425e-05	5.37332e-05	4.58213e-05	3.34349e-05	1.13976e-05	7.66925e-05	0.000433286	0.000400149	0.000448911	0.000104013	4.74777e-06	3.17943e-05	1.04124e-05	3.51496e-05	0	7.54386e-05	5.66564e-05	5.87435e-06	6.47919e-05	3.30146e-05	2.9269e-05	1.10037e-05	8.1017e-05	3.94896e-05	2.70933e-05	5.97974e-05	36639
		NADH dehydrogenase [ubiquinone] iron-sulfur protein 3, mitochondrial OS=Homo sapiens GN=NDUFS3 PE=1 SV=1	NDUFS3	8	167.02	0.00159149	1.6713e-05	5.64059e-05	0.000648733	0	1.02678e-05	0.000110722	7.45847e-05	0.00039394	7.67755e-05	8.34492e-06	1.06459e-05	2.11881e-05	9.43357e-05	0.000234263	8.54087e-05	0.000102805	4.43552e-05	2.62113e-05	2.30867e-05	6.58176e-05	0	0.000151292	3.9148e-05	0.000127875	7.24089e-06	7.06732e-05	6.55655e-05	9.93048e-05	3.84347e-05	1.54494e-05	6.8687e-05	1.32584e-05	30241.4
		Reticulocalbin-2 OS=Homo sapiens GN=RCN2 PE=1 SV=1	RCN2	3	167.01	3.5095e-06	1.51789e-06	6.88181e-06	1.25336e-05	0	5.76757e-07	4.91227e-05	5.54966e-06	3.66458e-07	0	1.01774e-06	8.1592e-05	3.2394e-05	5.41087e-05	5.48775e-05	6.31213e-06	0.000133145	0	1.46027e-07	0.000428476	2.01508e-06	0	3.17185e-06	3.16818e-06	0	2.38112e-07	1.42609e-05	1.36821e-06	3.53761e-06	4.92643e-06	6.78649e-07	6.3567e-06	8.81888e-06	36876.6
Core matrisome	ECM Glycoproteins	Procollagen C-endopeptidase enhancer 1 OS=Homo sapiens GN=PCOLCE PE=1 SV=2	PCOLCE	8	166.91	0	1.38697e-06	2.20075e-06	4.12326e-06	0	0	1.52263e-06	3.78144e-07	0	0	0	0	7.01749e-07	0.000137332	1.82048e-05	8.89297e-05	0.000122865	5.46313e-05	2.58045e-06	0.000116821	4.72086e-06	1.48869e-06	1.15906e-05	0	6.83e-05	9.27442e-07	3.45663e-05	0.000131301	4.43735e-05	3.50175e-05	5.86605e-05	3.087e-05	0.000188972	47972.6
Core matrisome	ECM Glycoproteins	Cartilage oligomeric matrix protein OS=Homo sapiens GN=COMP PE=1 SV=2	COMP	3	166.88	0	1.08018e-05	0	0	0	0	0	0	0	0	0	0	0	0.000122126	0	5.18036e-05	7.78654e-05	0	0	0	0	0	0	2.96772e-06	0	0	0	4.40205e-05	0	0	0	0	7.97441e-05	82859.5
		Proactivator polypeptide OS=Homo sapiens GN=PSAP PE=1 SV=2	PSAP	10	166.86	0	8.29565e-06	0.000170997	0	0	0.000604366	0.00023668	0.000348555	0.000350934	0	0.000364389	0.000151668	0.000553972	0.000365206	0.000617641	0.000279513	0.000548688	0.00187704	0.000205452	0.000409138	0.000173424	1.93505e-06	0.000756351	0	0.000284099	0.000163624	0.002214	0.000652953	0.000674962	0.00038525	0.000135135	0.00200978	0.000224017	97805.7
		Serine/arginine-rich splicing factor 2 OS=Homo sapiens GN=SRSF2 PE=1 SV=4	SRSF2	3	166.56	3.52359e-05	0	1.71497e-06	0	0	1.08125e-06	0	8.12026e-08	0	0	2.39456e-06	0	0	5.35089e-05	0.000205193	6.17832e-05	2.06262e-05	3.27603e-05	0	0	0	0	2.49704e-07	0	0	0	4.24233e-05	6.32575e-05	4.53911e-05	0	0	0	3.58391e-06	25475.8
		Complement factor B OS=Homo sapiens GN=CFB PE=1 SV=2	CFB	12	166.37	0.000239675	0	1.34487e-05	0.00190725	0	7.15083e-05	0.000526984	1.47559e-05	8.63534e-05	0.0015776	1.00954e-05	0.000224761	2.21302e-05	0.000234931	9.71649e-05	0.000192426	0.000261563	5.2686e-05	8.79074e-05	4.22752e-05	5.76634e-05	0	0.000198244	2.17616e-05	0.000237577	0.000114725	1.97547e-05	5.50204e-05	4.2528e-05	3.18541e-05	4.03123e-05	4.95262e-05	0.000137288	85534.8
		Pyrroline-5-carboxylate reductase 1, mitochondrial OS=Homo sapiens GN=PYCR1 PE=1 SV=2	PYCR1	2	166.28	0	0	1.03525e-06	0	0	0	2.88944e-06	4.49885e-07	0	0	0	0	7.70395e-06	4.25592e-06	9.04276e-06	5.00934e-05	3.13815e-05	1.41985e-06	6.74522e-07	3.54557e-07	6.68954e-06	0	3.92692e-06	0	0	0	0	0	0	0	0	0	5.88335e-05	33360.8
Matrisome-associated	ECM-affiliated Proteins	Protein ERGIC-53 OS=Homo sapiens GN=LMAN1 PE=1 SV=2	LMAN1	6	166.02	0	0	0	5.31462e-06	0.00405881	9.80371e-07	0	0	9.39096e-07	0	0	0	0	8.05247e-05	0.00012595	9.82844e-05	0.000377267	0	0	1.66544e-06	2.28578e-06	0	0	0	0	0	4.0529e-07	2.59263e-06	0	0	0	0	0	57549.6
		Peroxiredoxin-5, mitochondrial OS=Homo sapiens GN=PRDX5 PE=1 SV=4	PRDX5	5	165.83	0	1.23457e-05	0.00010885	4.0094e-06	0	1.21889e-05	0.000132466	5.47641e-05	7.47986e-05	0	0	0.000158069	5.56138e-05	0.000436678	0.000304272	0.000269966	0.0001251	1.90083e-05	4.83033e-05	9.46885e-05	6.35927e-05	0	0.000158682	0	0.000110308	0.000185951	5.65616e-05	0.000110857	5.60782e-05	0.000214418	0.000173737	5.69633e-05	0.000354417	22085.8
		Matrin-3 OS=Homo sapiens GN=MATR3 PE=1 SV=2	MATR3	6	165.59	0	1.05994e-05	3.03076e-05	7.47451e-06	0	4.66488e-06	0	0.000412092	3.89082e-06	0	2.13972e-06	1.06377e-06	1.03639e-05	0.000100425	0.000317346	0.000120541	0.000153927	3.19273e-05	4.62519e-06	1.34123e-05	1.12549e-05	8.58831e-07	4.55229e-05	2.52499e-06	6.06698e-05	2.50765e-07	6.21784e-05	7.04688e-05	8.60203e-05	8.8472e-05	4.00938e-06	7.22608e-05	4.81098e-06	94626.6
		Double-stranded RNA-specific adenosine deaminase OS=Homo sapiens GN=ADAR PE=1 SV=4	ADAR	3	164.76	0	0	0	0	0	0	0	0	3.78849e-07	0	0	0	0	1.32957e-05	8.00504e-05	2.50921e-05	2.31019e-05	3.50049e-06	0	0	0	3.3971e-07	1.02861e-06	2.21682e-06	0	0	2.41072e-06	1.21574e-06	1.18087e-05	1.88336e-07	3.19887e-07	6.56838e-06	8.94663e-06	136072
		Ceruloplasmin OS=Homo sapiens GN=CP PE=1 SV=1	CP	7	164.72	0	4.0281e-05	7.23971e-05	0	1.4202e-05	6.38728e-08	6.87998e-07	3.72166e-07	1.03462e-06	4.18861e-05	0.000101041	8.82489e-05	5.9228e-05	0.000103834	4.16923e-05	0.000154921	9.92867e-05	3.39372e-05	0.000303128	1.21122e-05	0.000103032	0	0.000123929	0	0.000474345	2.18414e-05	8.92814e-06	4.92259e-05	1.17889e-05	4.05859e-05	3.82559e-06	4.91837e-05	1.37257e-06	122209
		Putative tubulin beta chain-like protein ENSP00000290377 OS=Homo sapiens PE=5 SV=2	Putative tubulin beta chain-like protein ENSP00000290377 OS=Homo sapiens PE=5 SV=2	3	164.33	0	8.63249e-06	1.92583e-05	0	0	7.87667e-05	0.000203335	1.90648e-06	2.83523e-06	0	0.000131592	9.75136e-05	0	0.000721267	0.000653259	0.00083697	0.000216675	5.51745e-05	0	5.67256e-05	7.57537e-06	0	6.34014e-06	2.27407e-06	2.70883e-05	7.79982e-05	0.000176304	0.000497844	0.000263066	0	3.74015e-06	0.000119623	0.000474567	41775
		Radixin OS=Homo sapiens GN=RDX PE=1 SV=1	RDX	8	163.91	0	7.81844e-08	2.8858e-06	0	0	1.78871e-05	0.00011302	0.000186914	0.000152347	0	0.000275307	0.000152414	0.000113436	0.000300038	0.000108831	0.000100063	0.000134256	1.21766e-05	3.79495e-05	3.90359e-05	6.18786e-05	3.37525e-05	0.000112183	0.000105711	0.000327034	1.76993e-05	4.73045e-05	3.19567e-06	0.000139422	9.68952e-05	4.52219e-05	1.44319e-05	6.24454e-05	68565.4
		60S ribosomal protein L18 OS=Homo sapiens GN=RPL18 PE=1 SV=2	RPL18	4	163.55	0	6.60163e-05	0.000149758	2.52961e-05	0	9.14603e-05	5.39529e-05	4.10278e-05	7.2988e-05	1.24412e-05	1.63198e-05	6.61209e-05	1.44109e-05	0.000256071	0.000371418	0.000366843	0.000366894	0.000240232	2.15625e-05	0.00011207	9.23701e-05	3.94265e-06	0.000348817	0.000345059	2.04671e-05	0.000127071	0.000133215	0.000198806	0.000271911	0.000215599	4.41207e-05	0.000566307	0.000229475	21634.2
		Integrin alpha-V OS=Homo sapiens GN=ITGAV PE=1 SV=2	ITGAV	5	163.37	0	3.10114e-06	4.96489e-06	3.88592e-05	0	6.41799e-07	4.18858e-05	1.6109e-06	2.99165e-05	1.19438e-06	3.52645e-06	9.16381e-06	4.26627e-07	6.65597e-05	0.000136588	6.55112e-05	0.000149817	3.49701e-05	1.6142e-05	0.00010163	6.02158e-05	0	2.18406e-05	2.88575e-06	0.00118415	8.57276e-05	4.5128e-05	5.52515e-05	4.6418e-05	4.2417e-07	8.78314e-07	3.3238e-05	4.96957e-06	116044
		Cytosolic non-specific dipeptidase OS=Homo sapiens GN=CNDP2 PE=1 SV=2	CNDP2	7	163.34	0	6.11668e-06	7.92528e-05	0.00019099	0	5.66621e-06	1.49231e-07	0	5.31494e-06	2.84868e-06	1.28909e-06	1.05922e-06	9.35744e-08	0.00013013	7.57016e-05	0.000168065	1.48973e-05	6.22323e-06	5.18243e-07	2.08532e-07	3.48215e-08	7.96417e-07	5.00148e-07	1.14506e-06	2.09256e-05	5.3765e-08	1.45935e-05	3.02296e-06	8.12681e-07	1.19064e-07	4.80404e-07	4.00601e-06	4.16566e-06	52880
		Cytochrome b-c1 complex subunit Rieske, mitochondrial OS=Homo sapiens GN=UQCRFS1 PE=1 SV=2	UQCRFS1	6	163.29	1.65555e-06	3.38692e-06	3.2478e-05	3.09168e-05	0	4.23967e-06	9.40726e-08	2.85881e-05	4.70177e-06	0	7.41846e-07	3.61906e-06	1.34226e-07	0.000115193	0.000326	0.000167646	0.000116764	3.43376e-05	2.34642e-05	3.17445e-05	6.92536e-05	0	7.58697e-05	4.3921e-05	1.80985e-05	1.65177e-05	8.61496e-05	0.000110754	0.000104167	4.85581e-07	3.42553e-07	1.27989e-05	1.13939e-05	29667.6
		Integrin alpha-7 OS=Homo sapiens GN=ITGA7 PE=1 SV=3	ITGA7	6	163	0	5.61469e-05	0.000219271	2.59215e-06	0	0.000120985	0.000433345	0.000248538	0.000614315	2.14276e-05	0.000283847	0.000630188	0.000512779	8.74342e-06	7.33487e-06	7.57582e-06	1.70897e-05	2.61641e-05	0.000292918	0.000125045	0.000459622	0	0.00064865	4.91149e-05	0.000678707	6.08205e-05	2.20276e-05	3.24067e-05	3.34138e-05	0.000226895	3.64732e-05	4.44005e-05	9.43263e-06	128953
		Small nuclear ribonucleoprotein Sm D1 OS=Homo sapiens GN=SNRPD1 PE=1 SV=1	SNRPD1	3	162.98	0	3.06891e-07	0	0	0	0	0	0	0	0	1.6119e-07	4.17544e-07	1.14283e-06	3.87033e-05	0.000109464	3.37585e-05	9.288e-05	4.09014e-07	0	1.38175e-06	5.52612e-07	3.42287e-06	1.46895e-07	0	0	3.31585e-07	7.2885e-06	3.47878e-06	1.72814e-06	0	0	1.8907e-07	1.09416e-06	13280.5
		Histone H3.2 OS=Homo sapiens GN=HIST2H3A PE=1 SV=3	HIST2H3A	3	162.9	5.54658e-06	0.000764721	0.00169253	0	0	3.04119e-05	9.6381e-05	0.00195057	0.00116087	0	0.00933284	0.00157968	0.000426668	0.00143149	0.0055204	0.0040454	0.000361497	0.000145491	0.00135687	0.000916533	0.000227079	0	0.000418207	4.16267e-07	0.000734556	9.97592e-05	0.000166836	0.000285666	0.000615179	0.000414479	0.000142247	0.000264512	0.000778601	15387.1
		Endoplasmic reticulum resident protein 29 OS=Homo sapiens GN=ERP29 PE=1 SV=4	ERP29	5	162.81	0	2.48454e-06	1.66016e-06	2.4175e-06	0	1.77206e-06	1.43425e-06	3.72972e-06	7.29699e-07	0.000157003	0	5.31788e-07	1.34188e-06	6.27422e-05	8.50463e-05	4.11602e-05	0.000221234	4.39373e-05	1.65784e-05	1.74746e-05	1.4916e-05	6.81233e-06	2.4577e-05	0	3.56524e-06	1.43314e-06	5.79643e-05	5.61441e-05	2.81487e-05	0	8.87641e-07	5.26407e-05	2.12422e-05	28994
		Unconventional myosin-Id OS=Homo sapiens GN=MYO1D PE=1 SV=2	MYO1D	7	162.81	0.000348483	6.59636e-06	1.21875e-05	0.0234653	0	1.96357e-06	4.47265e-06	6.5104e-05	3.18959e-05	0	6.34858e-07	1.79222e-05	3.95187e-05	0.000102233	4.63891e-05	5.33977e-05	8.39124e-05	5.24215e-05	1.64173e-05	1.07058e-05	6.50582e-06	9.74327e-06	6.58205e-06	0.000157318	5.97577e-05	3.24844e-06	9.44169e-05	8.00877e-05	4.31862e-05	1.23963e-05	2.28629e-05	7.07702e-05	3.113e-05	116209
		Serine/arginine-rich splicing factor 7 OS=Homo sapiens GN=SRSF7 PE=1 SV=1	SRSF7	2	161.66	0	0	9.70017e-06	0	0	2.68838e-05	4.08558e-05	2.19497e-05	4.34954e-05	0	0	2.35678e-05	8.59115e-06	5.99995e-05	0.000203704	9.36018e-05	7.96284e-05	5.23989e-05	0	0	2.08341e-05	0	2.16336e-05	3.83381e-05	0	3.93386e-05	1.74799e-05	7.24136e-05	7.7563e-05	2.1504e-05	2.97558e-05	5.27347e-05	9.23463e-05	27366.1
		Guanine nucleotide-binding protein G(i) subunit alpha-2 OS=Homo sapiens GN=GNAI2 PE=1 SV=3	GNAI2	4	161.41	0	7.02059e-05	0.000187323	0	0	1.12689e-05	0.000211437	9.65369e-05	0.00016504	0	0	0.000494796	0.000267293	0.000140062	0.000134573	0.000126348	8.75957e-05	0.000137983	9.41605e-05	0.000152437	0.000132598	4.78393e-07	0.000316312	1.31233e-05	0.000222857	4.37814e-05	7.87039e-05	0.000111699	8.50119e-05	0.000208295	0.000144035	0.000243366	9.62909e-05	40451.4
		60S ribosomal protein L9 OS=Homo sapiens GN=RPL9 PE=1 SV=1	RPL9	4	160.71	0	1.1954e-05	6.57604e-06	2.36702e-06	0	1.04877e-07	2.41853e-05	4.7538e-06	2.57364e-06	0	4.13811e-06	4.20255e-06	0	0.000183838	0.000288476	0.00017151	0.000233266	6.17833e-05	1.0173e-05	4.80609e-05	4.29922e-05	0	8.80593e-06	6.35001e-07	8.80012e-07	4.2757e-05	0.000158635	3.78383e-05	0.000250556	9.82023e-06	3.58367e-06	2.95277e-05	1.38186e-05	21863
		BTB/POZ domain-containing protein KCTD12 OS=Homo sapiens GN=KCTD12 PE=1 SV=1	KCTD12	5	160.51	0	3.50477e-07	2.7813e-05	0.00204237	0	2.91291e-05	5.25051e-05	5.64764e-05	6.95293e-05	6.66204e-06	2.88642e-06	0.000109227	3.09796e-05	0.000120768	0.000223195	0.000103166	0.000130485	8.78231e-05	9.59043e-06	6.04597e-05	1.65931e-05	0.000385691	8.20388e-05	0.000118834	7.96e-05	4.48119e-05	6.96804e-05	9.63246e-05	7.1292e-05	8.30997e-05	6.71219e-05	0.000133864	4.3368e-05	35700.9
		Mitochondrial import receptor subunit TOM40 homolog OS=Homo sapiens GN=TOMM40 PE=1 SV=1	TOMM40	3	160.15	0	8.22657e-06	6.33989e-07	0	5.44487e-06	6.24147e-06	0.000170798	5.43333e-07	4.77379e-05	0	2.76814e-06	6.82413e-07	1.06274e-06	1.37105e-05	0.000104531	3.80615e-05	4.1011e-05	3.42825e-08	1.05009e-07	5.08635e-07	1.97049e-08	4.96398e-05	0	2.08346e-06	0	5.10397e-08	1.33318e-08	9.24561e-07	1.5041e-07	1.99669e-07	5.40295e-08	2.52886e-06	1.51485e-06	37892.8
		Splicing factor U2AF 65 kDa subunit OS=Homo sapiens GN=U2AF2 PE=1 SV=4	U2AF2	8	160.06	0	3.04336e-06	1.00219e-05	6.3661e-06	0	4.54864e-06	8.03292e-06	0	0	1.32111e-06	0	3.07005e-06	3.82863e-07	9.67365e-05	0.000294349	9.82648e-05	0.000135274	1.57043e-05	9.81788e-07	9.88869e-06	2.82983e-06	1.9276e-05	6.48437e-06	4.11549e-06	8.28884e-07	4.43085e-06	6.04948e-05	9.10807e-05	6.39287e-05	3.75283e-07	2.05495e-07	3.42871e-05	3.10698e-05	53501.8
		Eukaryotic translation initiation factor 5A-1-like OS=Homo sapiens GN=EIF5AL1 PE=1 SV=2	EIF5AL1	3	159.9	0	4.74314e-05	3.61359e-05	0	0	1.32933e-05	0	9.83893e-06	2.19313e-05	0	0	2.78465e-06	2.34275e-05	0.000203601	0.000243518	0.000161444	0.00014888	5.42433e-07	0	1.681e-05	0	0	1.98144e-05	1.27721e-06	0	0	8.02508e-05	7.10181e-05	3.55299e-05	1.57169e-05	1.04981e-06	6.05579e-05	2.30932e-05	16772.2
		Glucosidase 2 subunit beta OS=Homo sapiens GN=PRKCSH PE=1 SV=2	PRKCSH	9	159.72	0	2.56826e-05	1.27314e-05	8.1887e-05	0	5.724e-05	5.93601e-05	1.03687e-05	0.000247456	0	0.000288762	0.000479479	7.23381e-06	0.000172788	0.000476332	0.000218551	0.000235899	7.73989e-05	1.39437e-05	8.41402e-05	4.84531e-05	0.000295328	0.000210437	7.06189e-05	7.2218e-05	0.000197711	9.89611e-05	6.72648e-05	7.11395e-05	3.64983e-05	4.22993e-05	8.8075e-05	0.000126765	59425
		Putative tropomyosin alpha-3 chain-like protein OS=Homo sapiens PE=5 SV=2	Putative tropomyosin alpha-3 chain-like protein OS=Homo sapiens PE=5 SV=2	3	159.09	0	0.00117851	0.0010213	5.33528e-05	0	0.00195604	0.000460111	0.00115605	0.00122898	0.000209647	8.49999e-05	0.000362062	0.000790946	0.000956645	0.000487589	0.000340801	0.000777694	0.000624561	0.00204242	0.000368795	0.000850179	0.000347345	0.000882758	0.00061846	0.000862614	0.00218038	0.000920598	0.000825144	0.000575066	0.000642879	0.000402506	0.000717085	0.000359663	26268.6
		60S ribosomal protein L23a OS=Homo sapiens GN=RPL23A PE=1 SV=1	RPL23A	5	158.8	0	3.64797e-05	6.86526e-05	0	0	0	0.000145637	3.99033e-05	7.35287e-05	0	0	5.61418e-05	8.78678e-06	0.000163991	0.000299093	0.000228465	0.000224266	0.000189941	4.70209e-05	0.000139775	9.16051e-05	6.04196e-07	0.000193686	0.000103546	7.02972e-05	0.000123679	3.26395e-06	0.000160331	0.000296437	0.000112639	0.000164105	0.0003187	0.000205406	17694.8
		tRNA-splicing ligase RtcB homolog OS=Homo sapiens GN=C22orf28 PE=1 SV=1	C22orf28	7	158.53	0	0	3.99094e-05	3.70187e-05	0	7.48778e-06	3.17552e-05	3.42195e-06	3.35347e-05	3.73277e-06	0	2.56713e-05	0	0.000107954	0.000122349	9.43413e-05	6.17274e-05	1.31177e-05	1.22331e-06	2.94044e-05	1.27314e-06	5.0205e-07	8.85189e-06	1.90008e-05	1.3658e-05	4.16616e-06	3.22681e-05	3.88332e-05	2.84863e-05	7.78999e-06	5.07136e-05	3.10236e-05	5.50097e-05	55211.1
		Lysozyme C OS=Homo sapiens GN=LYZ PE=1 SV=1	LYZ	4	158.21	0	7.4637e-06	6.53558e-05	0	0	1.05413e-06	0.000213047	0.000161896	5.59919e-05	0	0	9.5601e-05	0.00052137	3.26781e-05	3.28881e-05	2.73577e-05	7.48827e-05	0.000136857	0.000273108	2.98135e-05	0.000245801	0	3.32184e-05	0	0.000306257	2.85045e-05	0.000194876	0.000220988	7.98892e-05	2.68274e-05	0.000141989	6.00353e-05	1.274e-05	16535.7
		ADP/ATP translocase 1 OS=Homo sapiens GN=SLC25A4 PE=1 SV=4	SLC25A4	6	157.81	0	9.25909e-07	0.000155304	6.51335e-05	0	0.000231783	0.000399007	0.000626854	0.000433162	1.17255e-05	0.000520458	0.000349363	0.000416234	0.000263797	0.000696506	0.000597291	0.000840143	0.000119422	6.6774e-05	0.000100748	0.00019046	0	0.000323257	2.09991e-05	0.000298254	0.000115554	0.000114306	0.000206231	0.000197805	0.000271402	0.000207041	9.70521e-05	0.000217518	33065
		Methyltransferase-like protein 7A OS=Homo sapiens GN=METTL7A PE=1 SV=1	METTL7A	3	157.71	0	3.48542e-05	0.000128059	0	0	0.000145302	0.000187503	0.000192912	0.000286889	0	8.28064e-05	0.000380189	6.35338e-05	0.000169289	0.000208976	0.000120973	8.1431e-05	0.000274973	7.87167e-05	8.20288e-05	0.000156176	0.000530541	0.000415104	0.000138234	0.000301835	8.15113e-05	0.000407518	0.000272387	0.000192288	0.000165331	9.43165e-05	0.000290787	7.58624e-05	28318.8
		Obg-like ATPase 1 OS=Homo sapiens GN=OLA1 PE=1 SV=2	OLA1	4	157.32	0	0	6.19151e-06	0	0	2.7128e-06	6.68686e-07	1.53894e-06	2.59611e-06	0	0	1.99968e-06	9.1397e-06	2.86469e-05	2.99268e-05	2.36711e-05	7.7207e-05	0	0	1.58989e-05	1.86667e-06	0	0	0	0	4.02845e-06	1.03971e-05	2.32572e-05	1.09111e-05	0	1.67625e-07	1.31475e-06	2.70848e-06	99372.4
		Heterogeneous nuclear ribonucleoprotein F OS=Homo sapiens GN=HNRNPF PE=1 SV=3	HNRNPF	3	156.85	0	3.64041e-07	6.30791e-06	2.88882e-05	0	0	0	4.41522e-06	1.87395e-06	0	6.2901e-05	1.2155e-06	0.000326238	0.00021918	0.000374674	0.000158919	0.000156466	5.3566e-06	7.7267e-08	0.000290047	1.174e-06	0	1.46795e-06	0	1.24482e-06	0	2.62386e-05	3.0168e-05	2.19869e-05	0	1.91185e-06	1.62844e-05	1.54471e-05	45671.7
		Sarcoplasmic/endoplasmic reticulum calcium ATPase 3 OS=Homo sapiens GN=ATP2A3 PE=1 SV=2	ATP2A3	2	156.45	0	2.28434e-05	6.98097e-05	0.00236443	0	9.24456e-06	0	2.48973e-05	9.72816e-05	3.63771e-06	3.83934e-07	0	2.33556e-06	8.14033e-05	0.000200551	0.000110986	8.13796e-05	9.97245e-05	4.71424e-05	7.46566e-05	0.000104711	0	0.000163596	0	0	7.76586e-06	9.42429e-05	0.000108213	9.1107e-05	6.11475e-05	4.81506e-05	0.000111368	0.000110765	113982
		Ig lambda-3 chain C regions OS=Homo sapiens GN=IGLC3 PE=1 SV=1	IGLC3	2	156.16	0	0.000150803	0	0	0.000136711	0	5.61511e-06	1.5233e-06	1.23659e-06	0	0	1.61277e-05	3.26271e-07	1.69314e-07	0	2.42873e-06	9.63196e-07	3.06234e-06	1.95095e-05	3.47263e-06	0	0	1.15637e-06	4.91694e-06	5.03167e-06	2.37063e-07	3.08699e-06	1.119e-06	3.38141e-06	3.23625e-06	7.33781e-07	2.58006e-08	6.13477e-06	11235.7
		Vesicle-trafficking protein SEC22b OS=Homo sapiens GN=SEC22B PE=1 SV=4	SEC22B	3	156.08	7.77915e-05	9.1891e-06	2.30687e-05	3.33873e-05	0	7.02331e-07	2.44519e-06	0	0	0	4.92917e-06	7.03042e-05	7.76407e-07	4.40398e-05	0.000151349	8.17088e-05	9.01022e-05	3.54326e-05	1.17896e-06	1.11849e-05	1.66818e-05	0	3.39327e-05	1.51695e-06	0	5.71331e-06	3.12265e-05	2.51124e-05	3.27633e-05	2.37252e-05	6.4864e-06	2.4542e-05	5.39723e-05	24593
		Actin-related protein 2/3 complex subunit 1B OS=Homo sapiens GN=ARPC1B PE=1 SV=3	ARPC1B	4	155.97	0	0	0.00011594	0	0.00178518	6.6369e-05	6.98371e-05	5.7733e-05	6.44383e-05	0	4.106e-05	6.11575e-05	7.5962e-05	0.000128547	0.000170429	0.000160834	0.000134242	9.378e-05	7.76627e-05	4.20889e-05	9.8888e-06	0	2.28129e-05	3.15892e-06	8.00289e-05	5.45675e-05	5.93596e-06	5.1628e-05	5.75033e-05	2.63792e-05	7.34269e-05	3.94236e-06	5.44097e-05	40949.5
		Hypoxia up-regulated protein 1 OS=Homo sapiens GN=HYOU1 PE=1 SV=1	HYOU1	6	155.84	0	3.14283e-06	4.15838e-05	0	0	0.000144406	4.52077e-05	0.000133442	0.000235708	0	0.000119257	0.000292588	0.000249703	4.99993e-05	4.41504e-05	5.41338e-05	0.000520291	0.000219145	7.22427e-05	6.01202e-05	0.000110128	0	0	8.92468e-06	0.000231807	0.000143415	0.000178144	0.000287205	0.000191245	3.71213e-05	0.000173376	1.85147e-05	0.000330187	111340
		Eukaryotic translation initiation factor 5A-2 OS=Homo sapiens GN=EIF5A2 PE=1 SV=3	EIF5A2	4	155.74	0	0	7.86711e-06	0	0.00112925	1.64446e-05	0	3.51675e-06	1.68453e-05	0	0	5.79202e-05	6.74367e-06	0.000358482	0.000404437	0.000150661	5.64717e-05	1.42031e-05	0	3.0442e-06	9.77316e-06	0	2.55962e-05	0	4.4535e-06	1.88728e-05	2.93581e-05	6.93284e-05	6.57225e-05	4.04641e-05	0.000266185	9.32685e-05	6.07063e-05	16792
		Ethylmalonyl-CoA decarboxylase OS=Homo sapiens GN=ECHDC1 PE=1 SV=2	ECHDC1	3	155.41	0	2.02994e-05	2.93292e-05	0	0	3.02471e-07	0	6.95447e-07	1.38556e-07	5.56435e-05	0	0	1.18855e-06	8.69306e-06	6.56985e-06	1.16435e-05	2.55987e-05	1.10197e-05	1.3889e-05	1.64706e-05	3.99849e-05	0	3.32233e-05	0	0	0	2.94746e-05	1.05676e-05	2.96949e-05	5.54384e-06	7.47134e-07	1.35312e-05	1.44304e-06	33698.4
		Adipocyte plasma membrane-associated protein OS=Homo sapiens GN=APMAP PE=1 SV=2	APMAP	8	155.06	0	6.90605e-05	0.000204706	8.20271e-06	0	0.00011926	0.000711782	0.000671945	0.000662568	3.70605e-07	0.000224402	0.000719857	0.000815714	0.000360308	0.00043845	0.000432518	0.000272115	0.00028311	0.000233041	0.000217263	0.000433828	1.52914e-05	0.000681646	0.000147539	0.000688822	0.00020173	0.000230549	0.000428578	0.000304633	0.000505101	0.000321095	0.000262089	0.00088068	46481.7
		Ribosomal L1 domain-containing protein 1 OS=Homo sapiens GN=RSL1D1 PE=1 SV=3	RSL1D1	2	154.99	0	1.12467e-06	3.22784e-06	0	0	2.08624e-06	5.49055e-07	2.04756e-06	9.19559e-06	0	7.66924e-07	6.16214e-05	0	3.79147e-05	0.000130898	3.76689e-05	2.48815e-05	1.05663e-06	0	4.3974e-06	2.43208e-06	0	2.8727e-06	1.54624e-06	2.23399e-06	0.000106688	1.02389e-05	1.94605e-05	6.27909e-06	3.1288e-07	1.5089e-05	9.295e-06	9.30462e-06	54974.4
		PC4 and SFRS1-interacting protein OS=Homo sapiens GN=PSIP1 PE=1 SV=1	PSIP1	5	154.1	0	0	5.60497e-07	0	3.55092e-06	0	0	0	0	0	0	0	0	1.36479e-05	0.000136024	3.10548e-05	6.62539e-05	0	1.49706e-06	1.05508e-07	0	0	9.41582e-07	0	0	7.38272e-07	1.3235e-06	5.52711e-06	8.62384e-06	3.77988e-07	1.98403e-06	4.63833e-06	2.78761e-05	60103.8
		Cytochrome b-245 heavy chain OS=Homo sapiens GN=CYBB PE=1 SV=2	CYBB	3	154.05	0	2.48327e-06	1.23727e-05	0	0	3.40213e-05	0.00014655	0.000117571	4.42208e-05	0	0	0	0	3.08354e-05	7.73557e-05	4.76081e-05	9.77197e-05	4.80653e-05	1.27923e-05	2.87938e-06	1.27934e-05	8.77257e-05	4.4181e-06	2.07338e-05	1.00322e-05	4.48167e-06	6.62514e-05	2.05914e-05	4.48827e-05	3.02504e-07	0	2.73672e-05	1.37183e-07	65338
		116 kDa U5 small nuclear ribonucleoprotein component OS=Homo sapiens GN=EFTUD2 PE=1 SV=1	EFTUD2	5	153.53	5.31685e-07	2.34832e-07	6.04486e-05	0	0	1.49196e-05	3.1785e-05	0.00042189	4.05504e-05	0	4.57637e-06	0.000859652	2.866e-05	0.000104741	0.000200669	5.70045e-05	0.000118082	1.94998e-05	1.33149e-05	9.70579e-06	2.61317e-05	0	3.61391e-05	9.91469e-06	3.05302e-05	0.000832412	4.46095e-05	4.69674e-05	6.36269e-05	0.000152448	0.000404635	5.41599e-05	0.000100138	109441
		60S ribosomal protein L10a OS=Homo sapiens GN=RPL10A PE=1 SV=2	RPL10A	6	153.26	0	1.1264e-06	6.01105e-05	0	0	6.50561e-05	0.00015862	0.000236296	0.000247898	0	0.000140565	0.000142711	0.000176821	9.43461e-05	0.00045955	0.000191646	0.00038936	0.000145219	7.11951e-05	0.000140372	0.000109696	0	0.000174029	4.57319e-06	0.000253475	4.32882e-05	0.000378769	0.000328332	0.00014233	4.94975e-05	0.000116779	4.2007e-05	9.68394e-05	24831.3
		3-hydroxyisobutyrate dehydrogenase, mitochondrial OS=Homo sapiens GN=HIBADH PE=1 SV=2	HIBADH	3	152.7	1.64264e-05	3.73093e-06	1.97601e-05	0	0	5.92622e-06	0	0	6.34448e-07	0	0	3.64955e-07	3.24502e-07	3.69288e-05	0.000126838	1.61489e-05	1.19815e-05	2.23113e-06	0	7.97797e-07	5.51715e-08	0	1.14124e-05	0	0	0	1.75828e-05	1.57841e-05	7.2375e-06	2.65342e-06	0	1.99187e-06	7.86165e-08	35329.4
		Coatomer subunit alpha OS=Homo sapiens GN=COPA PE=1 SV=2	COPA	7	152.237	0	2.47083e-06	1.06421e-05	0.000154543	0	1.13596e-07	3.64916e-06	0	1.22688e-05	1.32623e-05	1.19008e-06	7.86926e-05	4.49793e-06	7.52129e-05	0.000129704	0.000135652	0.000184376	4.09194e-05	7.72682e-06	3.85273e-05	4.12129e-05	0	5.57743e-06	0	0	9.18617e-06	0.000131842	6.8829e-05	8.34385e-05	8.48404e-06	1.57412e-05	1.53572e-05	2.62005e-05	138352
		Nucleolar RNA helicase 2 OS=Homo sapiens GN=DDX21 PE=1 SV=5	DDX21	4	152.06	0	9.75969e-08	0	1.85983e-06	0	0	0	0	0	0	0	3.70133e-07	0	1.39282e-05	0.000106279	2.31182e-05	6.23226e-05	0	0	0	0	0	0	2.38671e-06	2.23435e-06	0	2.38503e-06	7.35078e-07	8.84692e-07	7.92559e-08	4.59623e-07	0	0	87347.1
		Bifunctional methylenetetrahydrofolate dehydrogenase/cyclohydrolase, mitochondrial OS=Homo sapiens GN=MTHFD2 PE=1 SV=2	MTHFD2	2	150.74	0	7.28309e-07	0	0	0	0	1.10807e-06	3.12319e-05	4.78184e-07	0	0	0	0	3.06689e-06	3.73648e-06	1.31936e-05	3.29569e-05	0	0	2.02206e-08	0	0	0	0	0	0	1.46492e-07	0	0	0	1.08486e-06	0	5.91613e-07	37895.4
Matrisome-associated	ECM Regulators	Procollagen-lysine,2-oxoglutarate 5-dioxygenase 1 OS=Homo sapiens GN=PLOD1 PE=1 SV=2	PLOD1	4	150.7	0	0	0	0	0	0	3.86947e-07	0	0	0	0	0	2.16851e-07	2.38191e-05	5.55589e-06	3.68747e-05	7.11015e-05	4.81801e-07	0	2.29124e-07	2.53711e-07	0	0	0	0	0	6.4102e-06	8.53101e-06	2.45791e-06	0	0	0	3.71938e-06	83553.3
		Guanine nucleotide-binding protein G(I)/G(S)/G(T) subunit beta-2 OS=Homo sapiens GN=GNB2 PE=1 SV=3	GNB2	2	150.64	0	4.69741e-05	9.20872e-05	0	0	0	0	2.69857e-07	0	0	0	0.00020462	0	6.37047e-05	6.95678e-05	8.5014e-05	3.55271e-05	9.62472e-05	7.91399e-05	6.7402e-05	0.000117869	0	0.000244754	2.81572e-07	9.27347e-05	1.89694e-07	5.39137e-05	7.17321e-05	5.52332e-05	0	0	0.000131242	4.44904e-05	37330.9
		Eukaryotic initiation factor 4A-II OS=Homo sapiens GN=EIF4A2 PE=1 SV=2	EIF4A2	5	150.53	0.00792996	0	1.27051e-05	0	0	6.73955e-06	4.91736e-08	0	8.55773e-07	0	0	0	1.26546e-06	7.79265e-05	0.000138502	0.000148635	0.000184745	8.19819e-06	2.32654e-07	1.98837e-06	4.58187e-06	0	0	0	4.85375e-07	8.53516e-07	3.00023e-05	3.58886e-05	2.02933e-05	0	0	6.58053e-06	8.06653e-06	46403.5
		NAD-dependent malic enzyme, mitochondrial OS=Homo sapiens GN=ME2 PE=1 SV=1	ME2	2	150.35	0	1.41089e-07	0	0.0015144	0	0	0	0	0	0.00230712	0	0	0	9.89158e-06	1.9776e-05	1.42774e-05	1.90184e-05	1.88008e-07	2.71213e-07	0	2.22878e-06	0	0	0	0	1.96253e-07	8.28328e-06	1.28056e-06	3.50041e-06	0	7.38897e-08	1.64466e-06	3.63194e-07	65446.5
		Caveolin-1 OS=Homo sapiens GN=CAV1 PE=1 SV=4	CAV1	6	150.01	0	7.3653e-05	4.79374e-05	0	0	6.99931e-05	0.000189149	6.70162e-05	0.000162336	0	0.000211894	0.000324368	0.00028412	0.000180178	0.000242546	9.02559e-05	0.00011069	3.06137e-06	6.9715e-05	9.00925e-05	0.000143888	1.72896e-06	9.0077e-05	5.04844e-07	6.0161e-05	6.78815e-05	3.99641e-05	5.3473e-05	2.48977e-05	6.5713e-05	1.13935e-05	4.09156e-06	2.0389e-06	20471.2
		Adenylate kinase 2, mitochondrial OS=Homo sapiens GN=AK2 PE=1 SV=2	AK2	7	149.53	0	6.18375e-06	0	3.43371e-06	0	7.42786e-06	4.26446e-05	4.42444e-07	3.19758e-05	1.25353e-06	0	3.2574e-06	8.87186e-07	8.81736e-05	0.000199236	4.8558e-05	0.000136116	4.98906e-06	0	1.09865e-05	1.69179e-06	0	5.92126e-08	0	0	6.20034e-06	8.50432e-06	1.28219e-05	1.7988e-05	2.40227e-05	7.74543e-06	9.37058e-06	1.82396e-06	26477.8
		DNA topoisomerase 1 OS=Homo sapiens GN=TOP1 PE=1 SV=2	TOP1	3	149.32	0	5.74061e-07	7.63058e-06	0	0	0	0	0	4.25074e-07	3.04323e-06	0	0	0	5.29309e-05	0.000129039	5.82677e-05	7.36634e-05	1.12343e-05	9.36709e-06	2.20042e-06	7.55954e-06	0	0	0	0	0	2.61665e-05	2.84932e-05	1.87028e-05	0	0	2.59756e-05	2.92117e-05	90729.5
		Nucleoside diphosphate kinase A OS=Homo sapiens GN=NME1 PE=1 SV=1	NME1	7	148.94	0	3.54498e-06	2.29128e-05	0.000119091	0.000181171	4.00331e-05	5.55297e-05	5.58438e-05	2.12758e-05	0.00165828	2.15855e-06	5.19412e-05	1.09034e-05	0.000811583	0.00132746	0.000742462	0.00031128	2.6191e-05	7.99909e-05	6.05473e-07	2.59767e-06	0.000137263	9.94099e-06	7.94048e-07	6.24535e-05	1.21812e-05	1.26074e-05	6.52561e-06	8.78796e-06	5.89409e-06	2.27933e-05	4.42127e-06	2.8243e-05	17147.6
		40S ribosomal protein S9 OS=Homo sapiens GN=RPS9 PE=1 SV=3	RPS9	9	148.81	3.08688e-06	2.87518e-06	7.31473e-05	0.000170347	0	0.000310846	0.000329478	0.000275749	0.000578046	0.000119312	9.79786e-05	0.000395904	6.79166e-05	0.000208488	0.000446444	0.000404958	0.000236457	0.000140703	1.59436e-05	0.000124827	0.000104463	7.94321e-06	0.000197385	8.37625e-06	0.000191897	0.000203961	0.000258499	0.00023053	0.000364983	0.000183412	0.000178285	0.000111319	0.000222371	22591.4
		Septin-9 OS=Homo sapiens GN=SEPT9 PE=1 SV=2	2009-09-01	5	148.53	0	1.12028e-05	4.06142e-05	5.1735e-06	0	2.81538e-06	1.08082e-05	0	1.70583e-05	0.000184577	1.94104e-06	2.17663e-05	4.80497e-06	0.000100904	9.24269e-05	8.1531e-05	9.17923e-05	6.01293e-05	5.32502e-05	2.14747e-05	3.2599e-05	0	4.91994e-05	3.62467e-05	4.50792e-05	1.71008e-05	3.51469e-05	4.04672e-05	4.33969e-05	6.14605e-06	3.63182e-05	1.14971e-05	8.0865e-05	65402.8
		Spectrin alpha chain, erythrocytic 1 OS=Homo sapiens GN=SPTA1 PE=1 SV=5	SPTA1	8	148.33	8.8643e-06	1.61061e-07	4.44385e-06	0.00228896	0	4.53853e-07	4.69533e-05	1.77939e-05	3.53378e-05	0.000136896	1.92214e-07	0.000196032	2.21893e-05	0	1.37255e-05	2.86937e-05	3.65514e-07	2.60057e-06	4.07456e-05	3.49356e-07	1.2986e-05	8.10749e-06	4.65876e-06	2.67895e-07	0.000208929	5.21124e-06	1.55974e-05	2.46586e-05	2.53343e-05	5.55767e-05	9.98088e-05	1.00218e-05	3.02117e-05	280027
		Tryptase beta-2 OS=Homo sapiens GN=TPSB2 PE=1 SV=2	TPSB2	5	148.15	0	0.000116799	0.000203494	2.44712e-05	0	0.00116202	0.000477935	0.000792287	0.000463746	0	0.0010269	0.000587086	0.00102953	7.4317e-05	6.49379e-05	4.29037e-05	4.88372e-05	0.00017093	0.000814923	0.000319458	0.00093523	0	0.000615305	3.28515e-05	0.000342913	0.00034563	0.000373959	0.000481409	9.32039e-05	0.000896654	0.000310935	0.000499779	4.9116e-05	30514.2
		40S ribosomal protein S17 OS=Homo sapiens GN=RPS17 PE=1 SV=2	RPS17	6	147.96	0	1.01364e-05	5.65737e-05	0	0	0	2.89121e-07	7.26377e-07	2.30279e-06	2.7198e-05	1.9077e-07	0	0	0.000247218	0.000297673	0.000261	0.000226966	1.78329e-05	3.88113e-05	8.77365e-05	5.95582e-05	6.81157e-07	2.53738e-06	0	0	3.71639e-05	0.000107649	5.54479e-05	0.000118367	1.06367e-06	3.17108e-06	0.000109974	9.50909e-06	15549.2
		Myosin light chain 6B OS=Homo sapiens GN=MYL6B PE=1 SV=1	MYL6B	2	147.96	0	0.00206367	0.00345738	2.0626e-06	0	0.00305703	0.000506102	0.00187709	0.00107095	0	0.000463247	0.000981759	0.00259375	0.00155391	0.000579849	0.000863625	0.0022603	0.00159497	0.00338135	0.00118276	0.00115219	0.00159778	0.000676098	0.00131572	0.00234332	0.00542299	0.00185605	0.00152082	0.000924094	0.00277384	0.00169763	0.0014461	0.00228135	22763.2
		Calponin-3 OS=Homo sapiens GN=CNN3 PE=1 SV=1	CNN3	4	147.74	0	0	1.16631e-06	0	0	7.19584e-08	0	0	9.72639e-08	4.21982e-06	0	0	5.22986e-07	0.000159275	8.04845e-06	6.83188e-05	8.01629e-05	0	0	1.80983e-06	1.63478e-07	6.25619e-06	2.41492e-07	3.37358e-06	1.0262e-05	0	0	1.10917e-06	1.01127e-06	0	0	3.47723e-07	5.03971e-05	36413.7
Matrisome-associated	ECM Regulators	Prothrombin OS=Homo sapiens GN=F2 PE=1 SV=2	F2	4	146.87	0	1.49375e-07	5.31698e-05	0	0	2.47311e-06	0.000217056	0	9.79577e-07	1.63463e-05	7.23048e-06	6.13536e-05	3.18516e-07	6.18064e-05	7.01038e-05	0.000191596	1.48692e-05	0.00012486	3.25794e-05	0.000139748	1.30625e-05	2.58902e-05	4.85156e-05	0	3.51538e-05	2.38769e-05	3.54878e-05	0.000174432	5.58092e-05	9.18131e-07	1.63354e-05	2.48822e-05	5.73741e-05	70037.3
		Plasma membrane calcium-transporting ATPase 3 OS=Homo sapiens GN=ATP2B3 PE=1 SV=3	ATP2B3	3	146.76	1.75125e-06	1.24037e-05	2.70124e-05	1.58104e-05	0	0	3.34352e-05	0.000106155	0	0	3.88542e-06	6.62066e-06	8.74457e-06	3.58452e-05	9.68725e-05	4.57783e-05	4.63422e-05	5.0442e-05	2.92486e-05	1.41385e-05	4.32743e-05	0	9.37162e-05	0	6.67292e-06	2.82993e-06	4.50652e-05	4.95929e-05	3.10762e-05	2.69141e-06	6.19881e-07	3.26605e-05	2.31426e-06	134204
		Hexokinase-1 OS=Homo sapiens GN=HK1 PE=1 SV=3	HK1	5	146.2	0	5.18234e-07	1.03482e-06	5.14997e-05	0	1.95149e-06	3.64909e-07	1.43709e-08	0	0	0	0	0	3.76977e-05	0.000147337	4.67903e-05	6.51015e-05	4.0675e-06	6.48898e-07	8.0971e-07	1.24628e-06	0	4.33889e-07	0	0	3.91568e-07	9.98186e-06	2.64977e-06	2.47737e-05	0	0	4.6762e-06	0	102491
		Ras suppressor protein 1 OS=Homo sapiens GN=RSU1 PE=1 SV=3	RSU1	8	145.39	0	2.21374e-05	9.42499e-05	3.55845e-06	0	6.61411e-06	3.0405e-05	0	2.75686e-06	1.89221e-06	4.48069e-05	0.000139322	4.17422e-05	8.58737e-05	6.35484e-05	6.16175e-05	0.000134907	1.45833e-05	3.24159e-05	1.78727e-05	4.08053e-05	0.000275471	0.000161031	7.0419e-05	7.13171e-05	8.02816e-06	6.43011e-05	9.36475e-05	6.68096e-05	5.86544e-05	5.77761e-05	9.71079e-05	5.98695e-05	31541.1
		Acetyl-CoA carboxylase 2 OS=Homo sapiens GN=ACACB PE=1 SV=3	ACACB	4	145.29	0	3.36e-05	5.08999e-05	0	0	1.03797e-05	5.90914e-05	3.43967e-06	0.00027323	0	4.8554e-05	9.90665e-05	7.48911e-05	6.69713e-08	5.58006e-07	1.21087e-05	0	8.62575e-07	8.73262e-06	9.31108e-07	9.2849e-05	0	0.000106171	0	2.4723e-05	6.69104e-06	3.31179e-07	0	5.70009e-06	3.07846e-05	1.82158e-06	1.62763e-06	4.05967e-07	276556
		Fatty aldehyde dehydrogenase OS=Homo sapiens GN=ALDH3A2 PE=1 SV=1	ALDH3A2	5	145.11	0	2.58168e-05	7.4997e-05	0	0	1.77415e-05	0.000130839	6.63886e-05	0.000104894	0	4.68759e-05	0.000258843	4.37647e-05	3.45499e-05	8.18381e-05	6.35575e-05	2.86884e-05	5.66152e-05	7.18335e-05	5.56559e-05	0.000134434	0	0.000163339	7.99509e-05	6.08337e-05	2.31855e-05	6.55191e-05	3.67734e-05	6.45883e-05	4.58309e-05	1.96039e-05	5.15605e-05	2.93156e-05	54850.2
		Cytochrome c oxidase subunit 5A, mitochondrial OS=Homo sapiens GN=COX5A PE=1 SV=2	COX5A	4	144.83	0.000519422	2.41958e-05	0.000131977	0	0	0.000223661	0.000726342	0.000452412	0.00107313	0	0.00058217	0.000503861	0.000212497	0.000390689	0.000539832	0.000349007	0.000483774	0.000270859	7.77676e-05	8.46621e-05	0.000329449	0	0.00048852	0.000129963	0.000342802	7.27093e-05	0.000255037	0.00023119	0.000732839	0.000382357	0.000148464	0.000339758	0.000236649	16761.2
		Ras-related protein Rab-5C OS=Homo sapiens GN=RAB5C PE=1 SV=2	RAB5C	3	144.81	0	8.30148e-07	1.28113e-05	0	0	0	0	2.42417e-06	9.95078e-06	0	1.57254e-05	0	3.55358e-06	4.66684e-05	7.38611e-05	3.97451e-05	0.000115308	2.43472e-05	0	9.09495e-07	1.68436e-06	0.00211875	0	3.66341e-05	6.68804e-06	6.54923e-07	2.92637e-05	3.43771e-05	2.2767e-05	0.000111165	0	0	0	23481.7
		40S ribosomal protein S6 OS=Homo sapiens GN=RPS6 PE=1 SV=1	RPS6	5	144.79	2.27703e-06	3.27288e-05	0.000117139	0	0	0.000733525	0.000241769	0.000553822	0.000285875	0	0	9.14292e-05	2.70118e-05	0.000197052	0.000394337	0.000367097	9.18751e-05	0.000261427	3.15803e-05	0.000119245	6.06682e-05	1.95153e-06	0.000102425	8.82949e-06	0.000148874	0.000214492	0.00017948	0.000152978	0.000343994	0.000132369	0.000185879	0.000264014	0.000219237	28680.8
		60S ribosomal protein L8 OS=Homo sapiens GN=RPL8 PE=1 SV=2	RPL8	6	144.46	0	3.61089e-05	0.000101231	0	0	0.000171989	4.70181e-05	1.27408e-05	0.000169091	0	2.83067e-05	7.5083e-05	2.24487e-05	0.000235117	0.000310954	0.000288919	5.94104e-05	0.000138201	0	7.22558e-05	5.95068e-06	0	0.000141848	9.52147e-05	4.1003e-05	0.000113196	0.000121857	2.07274e-05	0.000179097	0	6.39529e-05	9.95972e-05	9.08039e-05	28024.2
		Ig kappa chain V-III region B6 OS=Homo sapiens PE=1 SV=1	Ig kappa chain V-III region B6 OS=Homo sapiens PE=1 SV=1	4	144.372	0	7.51217e-05	9.00592e-05	0	0	0	1.18393e-05	1.32523e-06	1.01448e-06	0	1.273e-05	9.40441e-05	9.70793e-07	0.000128217	5.30295e-05	0.000326627	8.52624e-05	0.00071402	0.000178802	0.000164057	0.000116484	0	0.000326831	0	0.000473063	8.84948e-05	0.000412657	0.000144643	0.000257478	4.65939e-05	5.76554e-05	0.000258712	0.000254086	11546.9
		Coatomer subunit beta OS=Homo sapiens GN=COPB1 PE=1 SV=3	COPB1	6	143.96	0	2.24206e-05	3.59579e-05	0	0	4.81419e-05	2.15689e-05	1.80632e-05	4.99269e-05	0	5.30486e-06	4.65761e-05	7.07774e-06	7.06614e-05	9.11909e-05	6.86891e-05	7.41335e-05	0.000237956	0.000114993	0.000163886	0.000169544	4.1586e-06	7.83775e-05	0	0.000150046	3.95369e-05	0.000194452	0.000138511	0.000142331	3.1315e-05	4.10058e-06	0.000288227	6.9285e-05	107148
		Protein transport protein Sec23A OS=Homo sapiens GN=SEC23A PE=1 SV=2	SEC23A	2	143.58	0	4.33447e-06	9.8521e-06	2.66704e-05	0	0	0	0	0	0	0	0	0	9.85838e-05	5.1475e-05	9.73656e-05	7.81473e-05	8.15806e-06	2.023e-05	2.76361e-05	3.07434e-05	0	1.42767e-05	0	0	6.22793e-06	7.89265e-06	3.35053e-06	5.65904e-05	0	1.3966e-06	2.12783e-05	6.23504e-06	86163.5
		Splicing factor 3B subunit 3 OS=Homo sapiens GN=SF3B3 PE=1 SV=4	SF3B3	6	142.96	1.6144e-05	3.46084e-07	3.17297e-06	8.23394e-06	0	0	1.62726e-06	3.34604e-05	0	0	5.88481e-07	1.73453e-05	2.47951e-07	6.49986e-05	0.000152309	4.1746e-05	4.20711e-05	2.21442e-05	2.43848e-06	6.12034e-06	1.25685e-05	0	1.47326e-05	0	2.90446e-06	1.0336e-05	2.95367e-05	3.82877e-05	4.54621e-05	3.12058e-05	2.83906e-05	3.95929e-05	4.78609e-05	135583
		Dihydrolipoyl dehydrogenase, mitochondrial OS=Homo sapiens GN=DLD PE=1 SV=2	DLD	6	142.79	1.55642e-06	4.53076e-05	0.000301124	8.1275e-06	1.56009e-05	2.10536e-05	7.24533e-05	7.70469e-05	3.81851e-05	0	4.49746e-07	7.11758e-05	4.52307e-06	0.000108987	0.000265709	0.000170639	6.95969e-05	3.70883e-05	0.00010862	4.01853e-05	9.95445e-05	2.12795e-06	0.000264341	2.92618e-06	6.21458e-07	5.22001e-05	2.69188e-05	3.65853e-05	8.15884e-05	9.0348e-05	3.30487e-05	4.82728e-05	7.56504e-05	54178.3
		Ig lambda chain V-III region SH OS=Homo sapiens PE=1 SV=1	Ig lambda chain V-III region SH OS=Homo sapiens PE=1 SV=1	2	142.57	5.58394e-06	8.88456e-06	2.17339e-05	0	5.97339e-05	5.05582e-07	5.10476e-07	5.48003e-07	5.29777e-07	0	4.91967e-07	1.45092e-07	1.10665e-06	1.44879e-05	2.33713e-05	4.47418e-05	6.30456e-05	7.05995e-05	3.26804e-06	2.04591e-05	6.05669e-06	0	5.55766e-05	1.5311e-05	2.28211e-05	8.32435e-08	2.84897e-05	8.83993e-06	1.9528e-05	9.1403e-07	8.3819e-07	1.93977e-05	5.90713e-06	11391
		60S ribosomal protein L13 OS=Homo sapiens GN=RPL13 PE=1 SV=4	RPL13	6	142.07	0	9.53846e-05	0.000130874	1.34756e-05	0	0.000254608	0.000283252	4.68836e-05	0.000223412	0.000975419	6.39011e-05	0.000209715	5.08556e-05	0.000278263	0.000452608	0.000280187	0.000470832	0.000376141	5.57564e-06	0.000139308	5.04019e-05	3.87193e-07	0.000454012	0	0.000463198	0.00021087	0.00028235	0.000365446	0.000453716	0.00032495	0.000269916	0.000763876	0.00036068	24261.1
		Alpha-1-acid glycoprotein 1 OS=Homo sapiens GN=ORM1 PE=1 SV=1	ORM1	2	142.03	0	1.6272e-06	1.785e-06	0	0	0	0	0.000169901	0	0	0	1.27544e-07	5.89422e-07	0.00016334	4.53374e-05	0.000119237	4.07211e-05	1.07977e-05	4.51938e-05	1.34122e-05	2.96363e-06	0	4.66407e-06	0.00106596	0	8.08204e-06	1.84704e-06	3.97941e-06	1.83759e-06	1.44344e-05	2.68829e-06	0	9.60957e-07	23510.9
		60S ribosomal protein L23 OS=Homo sapiens GN=RPL23 PE=1 SV=1	RPL23	4	142.02	1.61232e-06	8.41105e-05	0.000148174	0.000198424	0	0	3.42759e-05	1.43206e-06	3.0179e-07	2.99789e-06	2.94654e-06	1.07199e-06	0	0.000304119	0.000389605	0.000305068	0.000281571	0.000295892	1.46517e-07	0.00014823	2.10371e-05	0	0.000156499	3.14046e-06	4.78817e-05	4.61671e-07	0.000446558	0.000255978	0.000329169	0	5.19199e-06	0.00041848	0.000215903	14864.6
		CDGSH iron-sulfur domain-containing protein 2 OS=Homo sapiens GN=CISD2 PE=1 SV=1	CISD2	2	141.91	0	9.01787e-08	2.17997e-06	0	0	0	0	0	9.15706e-07	0	0	1.17519e-07	2.37996e-07	1.678e-05	3.23179e-05	2.52302e-05	5.05603e-05	1.12929e-05	6.2179e-06	1.43947e-06	6.64461e-06	0	8.34295e-06	0	2.0282e-06	0	1.5864e-05	1.04168e-05	1.16642e-05	0	0	1.24665e-05	1.6932e-06	15277.5
		Charged multivesicular body protein 4b OS=Homo sapiens GN=CHMP4B PE=1 SV=1	CHMP4B	5	141.87	0	0	9.68312e-07	8.49519e-07	0	0	2.52949e-07	0	0	0	6.85135e-06	2.55165e-06	4.4944e-06	1.11785e-05	0.000110404	2.70684e-05	8.52048e-05	1.6936e-05	1.71499e-06	5.76779e-06	1.06326e-06	0	1.03521e-05	0	0	0	1.79987e-05	1.80196e-05	1.22785e-05	0	5.93721e-08	1.01557e-05	2.49726e-05	24949.7
		Coiled-coil-helix-coiled-coil-helix domain-containing protein 3, mitochondrial OS=Homo sapiens GN=CHCHD3 PE=1 SV=1	CHCHD3	3	141.66	0	1.85421e-05	4.6789e-05	0	5.39256e-06	4.05782e-05	0.000149656	0.000129466	0.000280752	0	8.15043e-05	0.000116835	0.000147139	4.0387e-05	0.000265912	8.24564e-05	6.52623e-05	2.66332e-05	3.87699e-05	3.92807e-05	6.63722e-05	1.35015e-06	0.000106838	8.11476e-05	0.000168637	5.23081e-05	4.55114e-05	5.10345e-05	5.22282e-05	0.000115142	6.64206e-05	4.23952e-05	8.41294e-05	26151.3
		HLA class I histocompatibility antigen, A-43 alpha chain OS=Homo sapiens GN=HLA-A PE=2 SV=1	HLA-A	2	141.63	0	0	1.13015e-05	0	0	0	0	0	0	0	0	0	0	2.30417e-05	7.02069e-05	3.90281e-05	2.69976e-05	1.39463e-06	1.46674e-06	1.29901e-07	0	0	2.2548e-07	0	0	0	1.58213e-06	8.50984e-07	7.2669e-07	0	0	0	1.68301e-06	41032.1
		Heterogeneous nuclear ribonucleoprotein D0 OS=Homo sapiens GN=HNRNPD PE=1 SV=1	HNRNPD	4	141.43	0	2.09595e-06	6.74487e-05	2.78307e-06	0	1.68202e-05	3.38009e-05	3.53706e-07	8.51078e-05	0	3.74035e-05	0.000119046	1.41749e-05	0.000236008	0.000341945	0.000210911	0.000317172	0.000127901	2.94107e-05	6.57326e-05	3.92121e-05	1.32818e-06	0.000156115	8.07499e-05	0.000102417	0.000107969	0.00014946	0.000320338	0.000280774	4.18501e-05	6.48598e-05	0.000284924	0.000223553	38433.6
		Ig lambda-1 chain C regions OS=Homo sapiens GN=IGLC1 PE=1 SV=1	IGLC1	1	141.24	0	0	0.000592384	0	0	0	1.1999e-05	0	5.13421e-06	0	0	0	2.47876e-07	0.000455966	0.000235006	0.000886127	2.98523e-05	2.28431e-07	5.46138e-05	8.71651e-05	2.22365e-05	0	9.01277e-05	8.75634e-07	7.065e-07	1.00087e-05	0.00010931	1.78148e-05	2.79326e-05	0	0	3.74923e-05	4.39437e-05	11345.9
Core matrisome	ECM Glycoproteins	Dermatopontin OS=Homo sapiens GN=DPT PE=2 SV=2	DPT	4	140.78	0	0.016871	0.000288568	0	1.10026e-05	0.0184982	0.00111931	0.0104145	0.00691828	5.02663e-06	0.0150536	0.00273068	0.0079461	0.000383729	0.000312801	0.000106056	0.000122321	0.0221198	0.0103611	0.015596	0.0137182	0	0.0119801	0.0174872	0.00283254	0.00884155	0.0173209	0.0147268	0.0151042	0.0123072	0.0103142	0.00430027	0.00753258	24003.5
		Hormone-sensitive lipase OS=Homo sapiens GN=LIPE PE=1 SV=4	LI	8	140.48	4.20046e-05	8.74782e-05	0.000120227	6.34756e-05	9.24794e-06	9.05384e-06	4.23864e-05	5.35245e-05	0.000137454	8.56027e-05	9.22142e-07	4.61655e-05	0	1.13583e-05	1.08394e-06	5.32865e-06	1.53804e-05	1.87789e-06	2.4811e-05	3.05405e-06	4.78494e-05	1.52008e-05	6.55207e-05	4.04471e-05	5.65193e-06	1.21677e-05	1.2014e-05	1.55541e-05	2.48351e-05	3.77718e-06	9.73756e-07	6.61489e-06	1.07524e-05	116602
		Azurocidin OS=Homo sapiens GN=AZU1 PE=1 SV=3	AZU1	4	140.16	0	3.91005e-06	0	3.17135e-05	4.41887e-05	0	0.000174939	0.000410687	1.12778e-05	0	1.5151e-05	4.80459e-05	0.00110918	4.68161e-06	1.69076e-07	0	6.16122e-07	1.93719e-07	9.84826e-05	2.38115e-06	4.68489e-05	0	1.45861e-05	2.06257e-06	0.000443959	8.42617e-06	0	4.98884e-06	2.51335e-07	1.38976e-06	9.01418e-05	0	0	26884.9
		Ig lambda-7 chain C region OS=Homo sapiens GN=IGLC7 PE=1 SV=2	IGLC7	3	139.42	1.78647e-05	0.000395195	0.000784072	0	0	1.42634e-06	0.00161766	1.97374e-05	0.000582795	0	2.59484e-05	0.000686674	3.04261e-06	0.00104532	0.00045895	0.001651	0.00143427	0.00433744	0.00118556	0.00254861	0.000739505	0	0.00217466	5.05816e-07	0.000508846	0.000752793	0.00402357	0.00117956	0.00117916	0.000378656	0.000517841	0.00142245	0.00273507	11300.9
		Putative ribosomal RNA methyltransferase NOP2 OS=Homo sapiens GN=NOP2 PE=1 SV=2	NOP2	2	139.09	0	8.55128e-07	7.86442e-07	4.89668e-06	0	0	0	0	0	0	0	0	0	5.79053e-06	7.88111e-05	1.69391e-05	8.61989e-06	8.98277e-06	0	0	6.76732e-07	0	1.15315e-06	0	0	0	9.74377e-06	7.8035e-06	1.12793e-05	0	0	1.79184e-05	9.34508e-07	89304.7
		Putative heat shock protein HSP 90-beta-3 OS=Homo sapiens GN=HSP90AB3P PE=5 SV=1	HSP90AB3P	2	138.877	0	0	7.28285e-05	0	0	7.21858e-06	0	1.38672e-05	1.66987e-05	0	1.51352e-05	1.87073e-05	1.39242e-05	8.34755e-05	9.86626e-05	0.000194769	5.05483e-05	1.95602e-05	0	6.25211e-06	3.96188e-06	0	9.69107e-06	1.00112e-05	3.22143e-05	1.69639e-05	1.82314e-05	4.0591e-05	6.08184e-07	8.9351e-06	0	0	1.66725e-05	68326.9
Core matrisome	ECM Glycoproteins	SPARC OS=Homo sapiens GN=SPARC PE=1 SV=1	SPARC	6	138.66	1.51683e-05	7.76777e-06	1.48242e-05	5.25843e-05	2.45446e-05	0.000432249	1.78567e-05	1.20062e-05	4.08988e-05	0.000140285	5.83293e-05	1.27024e-05	1.22475e-05	0.000125332	3.1821e-05	0.000143015	8.46101e-05	1.35116e-05	1.41852e-05	3.93877e-05	7.30733e-05	1.25102e-05	0.000141373	3.33083e-06	1.09817e-05	2.08267e-05	2.16146e-05	3.16452e-05	5.40076e-05	2.88254e-05	4.48448e-05	2.5503e-05	6.1792e-05	34631.3
		Scaffold attachment factor B2 OS=Homo sapiens GN=SAFB2 PE=1 SV=1	SAFB2	4	138.35	0	2.03209e-06	1.50161e-05	1.0906e-05	0	0.000292521	0	0.00014073	0.000112763	0	2.30168e-06	1.49106e-05	9.62148e-05	7.94967e-05	0.000168754	4.94979e-05	8.00239e-05	1.14575e-05	1.2308e-06	5.75875e-06	3.92663e-07	8.70773e-07	3.22459e-06	2.6682e-06	9.1607e-06	4.34268e-05	1.44858e-05	1.38774e-05	4.17585e-05	1.26847e-06	8.01847e-06	2.30573e-05	5.81635e-05	107475
		Serine/arginine-rich splicing factor 3 OS=Homo sapiens GN=SRSF3 PE=1 SV=1	SRSF3	5	138.29	0	2.13816e-05	8.47181e-05	0	0	0.000164975	1.3848e-07	3.44417e-05	2.76404e-05	0	2.12162e-05	2.11754e-05	2.29748e-05	9.48578e-05	0.000464686	0.000136506	0.000111861	0.000254874	3.27148e-05	7.78474e-05	1.02547e-05	4.24628e-06	1.80032e-05	0	1.77812e-05	1.17119e-05	3.95236e-05	0.000254096	0.000185715	0	1.82696e-05	1.91127e-05	9.24254e-05	19328.5
		Histone H3.3C OS=Homo sapiens GN=H3F3C PE=1 SV=3	H3F3C	4	138.23	0	0.00134094	0.00176802	3.49388e-06	0	0.00509889	0.00325075	0.00465506	0.00429067	1.51123e-05	0.00781062	0.00215159	0.00442818	0.00289741	0.0044001	0.00457981	0.00813455	0.00228694	0.0025234	0.00127279	0.00316484	0.000958755	0.00257189	0.00189337	0.00420243	0.00250425	0.00160639	0.000380208	0.00780141	0.00296994	0.00229798	0.00591908	0.00225226	15212.8
Core matrisome	Collagens	Collagen alpha-1(XVIII) chain OS=Homo sapiens GN=COL18A1 PE=1 SV=5	COL18A1	6	138.2	0	0.000219019	0.000455904	0	0	0.000118183	0.000422988	0.000152752	0.00031617	7.98331e-06	0.000147224	0.000450752	0.000338565	0.000135672	8.38145e-05	8.01617e-05	0.000148666	0.000142126	0.000142723	0.000222992	0.000214001	1.62851e-05	0.000291277	0.000284992	0.000729459	0.000169092	9.91597e-05	8.75878e-05	7.4201e-05	0.000424173	0.000203292	0.000351893	0.000189937	178192
		Cytochrome c oxidase subunit 6B1 OS=Homo sapiens GN=COX6B1 PE=1 SV=2	COX6B1	4	138.02	0	1.6991e-07	2.44451e-07	2.11815e-06	0	4.24642e-07	0	0	0	0	4.76833e-07	6.06041e-06	0	9.13367e-05	0.000192659	0.000100864	4.1308e-05	0	0	3.75001e-07	9.30741e-07	1.27815e-06	0	3.89801e-06	5.59839e-07	0	5.74353e-06	5.90304e-06	8.13608e-06	1.66362e-07	2.01485e-06	4.81067e-06	0	10190.6
		Paraspeckle component 1 OS=Homo sapiens GN=PSPC1 PE=1 SV=1	PSPC1	4	137.857	0	9.72222e-05	6.96113e-05	0	0	0.00151984	1.09389e-05	0.000597165	0.000170896	0	8.93053e-05	7.03898e-05	0.000236392	0.000194571	0.000229452	7.38537e-05	0.000214861	0.00151289	0.000453805	0.000965302	0.000872498	0	5.97945e-05	0.00127421	0.000172964	0.000939296	0.00055495	0.000699079	0.000905878	0.000208643	0.00063764	0.000134332	0.000899763	58743.9
		Estradiol 17-beta-dehydrogenase 11 OS=Homo sapiens GN=HSD17B11 PE=1 SV=3	HSD17B11	2	137.83	0	8.11269e-07	1.27859e-05	1.77637e-05	0	0	0	3.15938e-05	9.69686e-07	0	0	4.41852e-05	8.0912e-06	1.73861e-05	2.60191e-05	2.99462e-05	1.87476e-05	0.000112193	2.56865e-05	1.2638e-05	3.34818e-05	0	4.36205e-05	3.32044e-05	0	7.26679e-06	6.16111e-05	1.42415e-05	3.14006e-05	1.92479e-05	0	6.27466e-05	1.4174e-05	32936.4
		DnaJ homolog subfamily B member 11 OS=Homo sapiens GN=DNAJB11 PE=1 SV=1	DNAJB11	2	137.81	0	1.26953e-06	0	9.60192e-06	0	0	4.35023e-07	4.52909e-07	0	0	1.49253e-06	8.41013e-07	0	4.3576e-05	5.98871e-05	3.92337e-05	5.22932e-05	4.7976e-06	7.2722e-07	1.83068e-06	2.05324e-06	0	1.98801e-06	1.3266e-06	0	6.45388e-07	3.04737e-05	2.2327e-05	1.39511e-05	0	1.22076e-06	1.11516e-05	7.09754e-06	40514.4
		Ras-related protein Rab-8A OS=Homo sapiens GN=RAB8A PE=1 SV=1	RAB8A	1	136.98	0	0	0	0	0	0	0	0	0	0	0	0	0	3.76363e-06	7.11359e-06	8.38425e-06	0	0	0	0	0	0	0	0	0	0	0	0	0	0	0	0	0	23668.3
Matrisome-associated	ECM Regulators	Plasma protease C1 inhibitor OS=Homo sapiens GN=SERPING1 PE=1 SV=2	SERPING1	5	136.87	0	0	4.10836e-05	0	0	0	0.000105269	1.33319e-05	0.000153911	0	7.60828e-06	0.000105018	0	7.35425e-05	6.49117e-05	0.000146071	2.66458e-05	5.23976e-05	0.000229373	3.09736e-05	7.43413e-05	0	0.000176271	4.62335e-05	0.000108621	6.42793e-05	1.39052e-05	5.23083e-05	5.25398e-05	3.41344e-05	7.01281e-05	4.78604e-05	0.000134862	26922.4
Core matrisome	ECM Glycoproteins	EMILIN-2 OS=Homo sapiens GN=EMILIN2 PE=1 SV=3	EMILIN2	8	136.75	0	0.000211484	7.18355e-05	2.15744e-05	0	0.000183255	7.08898e-05	0.000247467	0.000101355	0.000138503	0.000492703	0.000125434	8.42779e-05	1.15569e-05	5.92805e-05	2.87748e-05	5.26362e-05	0.000223018	0.000107225	0.000103128	0.000296422	0.000547017	0.000340954	1.02305e-05	0.000131761	6.96432e-05	0.000122383	6.23864e-05	9.19989e-05	9.3056e-05	4.06256e-05	0.000137774	4.54908e-05	115690
		60S ribosomal protein L22 OS=Homo sapiens GN=RPL22 PE=1 SV=2	RPL22	2	136.58	0	0	0.000140725	0	0	0.000241683	0.000262252	0.000157839	0.000241409	0	9.97057e-05	0.000236895	7.49528e-05	0.000191559	0.000164562	0.000216521	0.000179857	0.000350524	3.74095e-05	0.000215868	0.000144326	0	0.000364744	0.000122633	0.000296743	0.000202609	0.00040129	0.000327568	0.000390624	0.00029811	0.000306084	0.000420982	0.000243162	14786
		Poly [ADP-ribose] polymerase 14 OS=Homo sapiens GN=PARP14 PE=1 SV=3	PARP14	4	136.05	0	0	1.82152e-08	0	0	0	3.32729e-06	2.63804e-07	1.09743e-06	0	0	0	2.25075e-07	2.21934e-06	1.2516e-05	6.24655e-06	4.74041e-05	0	0	0	0	3.86448e-08	0	0	0	2.03832e-07	1.61327e-06	6.59729e-07	5.42502e-07	0	2.14093e-07	9.91489e-08	0	202811
		Heat shock 70 kDa protein 4 OS=Homo sapiens GN=HSPA4 PE=1 SV=4	HSPA4	4	136.01	0	0	1.46817e-05	4.07885e-06	0	0	0	0	0	0	0	7.65372e-06	0	2.29561e-05	3.52676e-05	4.99481e-05	1.03589e-05	4.38101e-07	0	0	0	0	3.61945e-07	0	0	8.95166e-07	5.51959e-06	0	2.5816e-06	0	6.71522e-07	3.08681e-06	0	94333.9
		Integrin alpha-M OS=Homo sapiens GN=ITGAM PE=1 SV=2	ITGAM	4	135.15	0	0	0	0	0	8.55152e-07	0	3.91841e-05	0	0	4.13777e-07	2.98317e-06	3.5727e-05	4.19285e-06	1.73867e-06	2.39389e-07	1.18971e-05	8.39644e-06	5.31429e-05	5.09523e-06	1.30055e-05	0	6.55662e-06	0	0	2.91684e-06	2.35685e-07	3.44221e-06	0	3.62553e-07	8.11928e-06	8.38499e-06	0	127183
		THO complex subunit 4 OS=Homo sapiens GN=ALYREF PE=1 SV=3	ALYREF	4	134.53	0	1.16951e-06	1.11474e-06	0	0	0	9.11279e-06	1.82169e-05	5.19913e-06	3.76514e-06	0.000185618	0	2.13934e-05	6.1121e-05	8.21858e-05	1.63861e-05	5.61948e-05	9.6594e-05	2.68702e-06	0.000284959	7.19278e-06	0.00061853	7.19092e-07	1.08098e-06	8.43003e-06	3.23052e-06	0.000146657	4.39881e-06	0.000131945	3.77525e-06	0.000227278	0	3.25203e-05	26887.4
		C-1-tetrahydrofolate synthase, cytoplasmic OS=Homo sapiens GN=MTHFD1 PE=1 SV=3	MTHFD1	8	134.21	3.33926e-06	0.00027898	0.00166664	0	0	0.00767069	0.00100497	0.000506612	0.000904529	1.80745e-05	0.000185744	0.000148535	0.000364527	0.00060261	0.00117002	0.00126364	0.00133127	0.00249622	0.00101698	0.00420849	0.00480662	2.4825e-05	0.000838741	0.0121444	8.50799e-05	0.00645336	5.37224e-05	3.53933e-05	0.00159565	0.000222809	0.00728286	0.00147835	0.00561273	101564
		Haptoglobin-related protein OS=Homo sapiens GN=HPR PE=1 SV=2	HPR	6	133.85	0.0798144	5.33007e-05	0.000661599	2.63292e-05	0	0.00023915	0.00184391	0.00077894	0.00056963	0.0143372	0.000330989	0.000175114	0.000494224	0.000436545	8.91464e-05	0.000570191	0.0001207	0.0003881	0.000485269	0.000208196	0.000328704	1.48662e-05	0.000819051	0.000138445	0.000442606	0.00151222	1.97347e-05	0.000100305	9.00937e-05	0.000233021	0.000274474	0.000197887	0.000179381	39029.5
		Coronin-1A OS=Homo sapiens GN=CORO1A PE=1 SV=4	CORO1A	4	133.78	0	4.06577e-06	0.000187168	1.80463e-05	0	3.1977e-06	1.72241e-05	2.5951e-05	7.68701e-06	1.8915e-06	0	1.16168e-05	8.11854e-05	0.000121171	6.48573e-05	6.78757e-05	8.51396e-05	7.63803e-05	2.56032e-05	4.17666e-06	2.53724e-05	0	3.80003e-05	0	3.00294e-05	2.93401e-05	2.9981e-05	0.00011232	0.000137115	4.59722e-05	0.000269074	0.000233714	9.70266e-05	51026.6
		PDZ and LIM domain protein 3 OS=Homo sapiens GN=PDLIM3 PE=2 SV=1	PDLIM3	4	133.72	0	0	4.05811e-06	0.000253978	0	0	0	0	0	0	0	0	1.1137e-07	0.000151071	2.25961e-06	4.65308e-05	0.000183332	5.3427e-07	0	0	0	0	0	0	0	0	2.24656e-06	8.85596e-06	1.25085e-06	0	0	6.3243e-06	8.15104e-06	39232
		High mobility group protein HMG-I/HMG-Y OS=Homo sapiens GN=HMGA1 PE=1 SV=3	HMGA1	4	133.48	0.000176393	0	2.57177e-06	0	0	0	7.55055e-07	0	0	0	0	0	0	7.05957e-05	0.000413814	7.81298e-05	0.000343152	1.28561e-05	0	0	1.15026e-06	3.27645e-05	0	3.22191e-06	0	2.74096e-06	2.91424e-06	3.24773e-05	4.22278e-05	0	3.20066e-07	8.09914e-06	4.49045e-05	11674.4
		ADP/ATP translocase 4 OS=Homo sapiens GN=SLC25A31 PE=1 SV=1	SLC25A31	3	133.15	0	6.13148e-05	0.00029128	0	0	7.29478e-05	7.34277e-05	0.000142162	5.07871e-05	0	0	1.65732e-05	3.36834e-07	0.000313599	0.000986093	0.000827293	0.000849862	9.26252e-05	6.04525e-05	7.72253e-05	0.000114328	0	2.96664e-05	0	3.10497e-05	2.56745e-05	7.01971e-05	0.000100299	0.000242834	4.90731e-06	7.22359e-06	2.89556e-05	9.28682e-05	35022.7
		Heat shock protein 75 kDa, mitochondrial OS=Homo sapiens GN=TRAP1 PE=1 SV=3	TRAP1	4	132.7	0	8.36284e-05	0.000175112	0	0	4.15315e-06	7.26282e-07	3.0475e-05	7.41508e-06	0	3.55906e-06	0.000132348	3.96464e-05	0.000231858	0.000251285	0.0004704	9.42724e-05	6.963e-05	2.6628e-05	3.37391e-05	7.0881e-05	9.96063e-07	6.52022e-05	4.99714e-06	1.23348e-06	5.00151e-05	6.3461e-05	7.58531e-05	5.39941e-05	2.92688e-05	3.22741e-05	5.06742e-05	7.91523e-05	80113.6
		40S ribosomal protein S25 OS=Homo sapiens GN=RPS25 PE=1 SV=1	RPS25	3	132.68	0	7.18286e-06	0.000112616	0	0	0.000377646	0.00050907	0.000636607	0.000550691	0	0.0002025	0.000139945	0.000275079	0.00021972	0.000308983	0.000292734	0.000415192	0.000356559	0.000150519	0.000259421	0.000252703	0	0.000264621	0.000227653	0.000306004	0.000298364	0.000343064	0.000154441	0.000409877	0.00019451	0.000321863	0.000373698	0.000330367	13741.5
		HLA class I histocompatibility antigen, A-11 alpha chain OS=Homo sapiens GN=HLA-A PE=1 SV=1	HLA-A	1	132.16	0	0	0	0	0	0	0	0	0	0	0	0	0	0	0	0	2.94747e-05	0	0	0	0	0	0	0	0	0	0	0	0	0	0	0	0	40936.3
		Myristoylated alanine-rich C-kinase substrate OS=Homo sapiens GN=MARCKS PE=1 SV=4	MARCKS	5	132.1	0	2.62657e-05	1.46761e-05	0	0.0146332	0	0	0	0	0	0	0	0	0.000207949	0.000109106	0.000260944	3.53696e-06	4.91564e-06	6.38869e-07	2.51559e-06	1.26743e-06	0	4.61649e-06	0.00307638	0	0	2.59768e-06	1.52754e-06	8.58984e-07	0	3.55679e-08	2.9949e-06	4.42489e-06	31552.7
		Heterogeneous nuclear ribonucleoprotein A1-like 2 OS=Homo sapiens GN=HNRNPA1L2 PE=2 SV=2	HNRNPA1L2	3	132.05	0	7.63977e-06	9.23777e-06	0	0	0	0	1.03377e-06	0	0	0	0	0	5.76647e-05	9.63979e-05	4.88274e-05	1.49214e-06	0	3.73648e-07	1.16975e-05	7.64701e-06	0	2.30582e-05	9.36209e-05	0	7.06427e-06	0	0	1.41669e-06	3.78298e-07	3.7062e-08	2.54098e-05	0.000279702	34224.6
		Hemoglobin subunit gamma-2 OS=Homo sapiens GN=HBG2 PE=1 SV=2	HBG2	3	131.45	0	0	2.48374e-06	0.000222334	0	3.63471e-06	0	0	0	0	7.07721e-06	0	0	6.02117e-06	3.84035e-06	2.64264e-05	2.4084e-06	5.54241e-07	0.000148536	7.25839e-05	8.28537e-05	1.4514e-06	0.000366119	1.88595e-06	3.7051e-05	4.17434e-05	1.03576e-06	9.22803e-05	1.55892e-05	0.000241892	8.54664e-05	0.000144004	1.98006e-05	16125.3
		Ras-related protein Rap-1A OS=Homo sapiens GN=RAP1A PE=1 SV=1	RAP1A	2	131.35	0	0.000123489	0.000263102	0	0	8.05305e-05	0.000136119	0.000149896	0.000144553	0	0	0.000183834	0.000336542	0.000129861	0.000197314	0.000149868	0.000151492	0.000221791	0.000176514	0.00014932	0.000300624	0	0.00031639	0.000181708	0.000309964	0.000116207	0.000102498	9.93629e-05	0.00018963	0.000250773	0.000159844	0.00024925	0.000173436	20986.4
		Protein DEK OS=Homo sapiens GN=DEK PE=1 SV=1	DEK	5	131.14	0	2.2418e-05	0	4.07393e-06	0	0	0	0	2.4005e-07	0	0	0	1.49619e-06	5.40594e-05	0.000226525	8.27509e-05	4.27082e-05	7.20249e-06	4.54176e-08	1.80486e-06	1.83589e-05	0	0	2.37477e-06	0	4.33288e-07	9.89004e-06	4.13444e-05	1.33868e-05	3.55853e-07	1.7526e-06	1.73347e-05	2.09208e-05	42674.9
		Calponin-2 OS=Homo sapiens GN=CNN2 PE=1 SV=4	CNN2	4	130.86	0	4.22642e-07	4.37974e-07	0.000160191	0	3.39716e-07	3.11651e-06	2.37694e-06	0	1.19379e-05	1.08024e-06	1.41742e-05	0	0.000327231	4.04303e-05	0.000103412	0.000188786	3.19533e-06	0	4.50312e-07	0	0	0	0	0	0	7.31186e-07	6.34173e-05	1.03229e-05	0	0	6.56013e-06	0.000180155	33696.7
		Eukaryotic initiation factor 4A-III OS=Homo sapiens GN=EIF4A3 PE=1 SV=4	EIF4A3	5	130.75	1.9988e-05	4.5533e-06	5.99291e-06	7.0044e-06	0	0	0	5.9451e-07	5.50165e-06	0	0	0	0.000140877	4.58648e-05	0.000228226	6.2406e-05	0.000115076	1.61266e-05	3.68813e-06	5.78942e-06	9.07329e-06	0	8.63627e-06	3.27922e-07	3.6099e-06	2.60557e-06	3.01965e-05	4.0679e-05	2.65478e-05	0	1.93634e-06	3.05442e-06	8.18734e-06	46872.4
		Epithelial cell adhesion molecule OS=Homo sapiens GN=EPCAM PE=1 SV=2	EPCAM	1	130.61	0	0	0	0	0	0	0	0	0	0	0	0	0	8.64996e-08	4.13587e-05	1.16828e-05	1.02917e-05	0	5.82054e-07	0	0	0	2.61363e-07	0	0	9.0243e-06	0	1.51221e-07	1.76205e-07	0	2.00261e-07	0	1.00018e-07	34932.2
		Structural maintenance of chromosomes protein 3 OS=Homo sapiens GN=SMC3 PE=1 SV=2	SMC3	6	130.51	0	2.31807e-07	5.75023e-06	1.06207e-05	0.000759123	2.30854e-06	5.92118e-06	6.42692e-07	5.32098e-06	0	4.24792e-06	5.45967e-06	1.89696e-06	2.24543e-05	0.00011453	6.18461e-05	5.26546e-05	1.52344e-06	4.14104e-06	6.79908e-06	7.02998e-06	5.13126e-06	7.00186e-06	9.18633e-07	4.68854e-06	2.86058e-06	2.04621e-05	2.01482e-05	3.38888e-05	8.28151e-06	2.15017e-06	2.66614e-05	2.25035e-05	141549
		Transmembrane emp24 domain-containing protein 4 OS=Homo sapiens GN=TMED4 PE=1 SV=1	TMED4	3	130.47	0	0	3.27668e-05	0	0	4.47216e-05	4.76273e-05	0.000165469	7.99395e-05	0	5.88703e-05	8.72038e-05	7.71798e-05	8.97182e-05	0.000145272	9.73525e-05	0.000181054	4.86082e-05	2.54437e-05	5.21879e-05	5.01118e-05	1.02236e-06	0.000101245	8.9916e-05	0.000107813	1.86686e-05	0	5.61198e-05	5.81554e-05	0.000106828	7.0654e-05	4.13325e-07	0.000194888	25942.1
		Alpha-soluble NSF attachment protein OS=Homo sapiens GN=NAPA PE=1 SV=3	NAPA	3	130.46	8.22051e-07	0	4.23882e-06	1.18004e-05	0	7.75142e-07	3.32443e-05	2.20959e-07	0	0	3.10878e-06	7.44518e-07	1.17444e-06	3.32567e-05	8.41225e-05	2.58703e-05	3.41513e-05	8.8787e-06	3.75067e-06	1.69498e-06	4.02733e-06	0	6.37858e-06	1.09208e-06	0	4.5134e-05	5.90761e-06	1.26588e-05	1.21587e-05	0	5.18036e-06	8.49175e-06	0	33232.8
		Niban-like protein 1 OS=Homo sapiens GN=FAM129B PE=1 SV=3	FAM129B	5	130.07	0	2.68903e-07	1.26193e-06	0	0	0	3.75609e-07	6.60227e-06	0	0	2.52452e-05	1.44622e-05	7.39554e-06	1.91437e-05	3.1886e-05	3.30527e-05	0.000112088	4.57355e-06	1.95102e-06	8.48628e-06	4.80734e-06	1.71535e-06	1.02544e-05	0	1.33101e-05	2.19752e-07	2.91223e-05	2.57191e-05	1.04192e-05	2.56363e-07	1.25281e-05	1.18813e-06	6.52839e-06	84140.1
		40S ribosomal protein S2 OS=Homo sapiens GN=RPS2 PE=1 SV=2	RPS2	6	130.05	0	3.53189e-05	0.000181517	9.25545e-06	0	0.000250957	0.00010059	0.000565894	0.000350577	0	0.000190299	0.000209786	0.000210924	0.000167249	0.000262754	0.000280504	0.000222893	0.00031291	0.000156481	0.000203472	0.000195406	4.90988e-05	0.000187511	0.000396819	0.000282231	0.000278345	0.000124826	0.000140905	0.000281061	0.000273127	0.000328895	0.000261652	0.000375927	31324.6
		Nucleosome assembly protein 1-like 1 OS=Homo sapiens GN=NAP1L1 PE=1 SV=1	NAP1L1	2	129.55	0	1.46757e-06	4.63464e-06	0	0	0	0	0	0	0	0	0	1.55001e-06	0.00011205	2.69003e-05	0.000132094	6.85261e-05	4.5615e-06	4.46327e-06	3.14611e-06	3.28683e-06	0	8.88249e-06	1.50614e-06	2.15365e-07	0	8.29854e-05	1.84813e-05	1.51385e-05	2.18037e-07	1.93444e-06	5.92424e-06	2.83134e-06	45374.5
		14-3-3 protein eta OS=Homo sapiens GN=YWHAH PE=1 SV=4	YWHAH	3	129.49	0	5.5387e-06	6.80161e-05	0	0	0.000250854	3.08431e-05	5.55308e-05	1.97403e-05	1.48312e-05	8.33067e-06	0.000119286	2.0224e-05	0.000128906	5.57802e-05	8.15938e-05	2.72823e-05	9.35463e-05	6.16394e-05	7.36892e-05	6.79389e-05	5.14571e-06	2.84222e-05	0.000123849	7.75497e-05	0.000518702	0.000145564	6.98287e-06	0.000106856	2.23883e-05	0.000114884	3.7034e-05	3.39136e-05	28218.6
		Plastin-3 OS=Homo sapiens GN=PLS3 PE=1 SV=4	PLS3	7	129.46	1.27443e-05	5.20598e-06	0.000125186	1.19831e-05	0	1.86833e-05	0.000241532	1.09839e-06	6.66157e-05	0.00013668	0	9.60588e-06	4.47469e-06	0.000236105	4.37881e-05	0.000150185	9.04271e-05	0.0003443	1.11924e-05	0.000111115	1.20857e-05	0	4.53029e-05	3.87528e-06	0	6.6592e-05	0.000183306	5.3144e-05	6.41965e-05	5.34868e-05	1.30785e-05	5.31555e-05	4.22176e-05	70814.4
		Creatine kinase B-type OS=Homo sapiens GN=CKB PE=1 SV=1	CKB	3	129.03	0	2.15087e-05	0.000203467	0	0	0	0	0	0	0	0	0	1.38665e-06	3.24234e-05	4.96084e-05	3.3e-05	7.57068e-07	1.28261e-06	0	0	0	9.50785e-07	9.39142e-06	1.13851e-05	0	4.7251e-07	2.31417e-07	2.22318e-06	1.13348e-05	0	0	1.58562e-06	3.15587e-05	42644.8
		Acidic leucine-rich nuclear phosphoprotein 32 family member E OS=Homo sapiens GN=ANP32E PE=1 SV=1	ANP32E	4	128.8	1.75368e-05	0	5.83352e-06	0	0	2.2916e-06	0	0	4.70352e-06	0	0	1.19228e-06	2.72591e-06	3.11592e-05	0.000208198	9.61067e-05	7.64817e-05	2.95054e-05	5.62711e-06	2.35271e-06	9.60684e-06	0	1.41972e-05	4.87491e-07	1.59407e-06	4.37158e-06	8.35117e-05	9.90612e-05	5.87337e-05	9.23677e-06	3.11077e-05	4.70234e-05	4.81057e-05	30691.9
		Aldehyde dehydrogenase X, mitochondrial OS=Homo sapiens GN=ALDH1B1 PE=1 SV=3	ALDH1B1	3	128.77	0.000413636	2.01439e-05	9.08971e-05	0.00145195	0	1.79524e-05	0.000537445	3.81313e-07	0.000126424	4.23954e-06	0	3.55393e-07	0	0.00025584	5.04343e-05	9.53125e-05	8.53296e-05	1.68358e-05	7.61002e-05	2.97162e-05	8.03303e-05	0	1.26132e-05	3.41727e-05	1.32511e-05	7.27644e-07	6.98511e-05	0.00011152	0.000138859	6.28492e-06	6.62602e-05	3.98874e-05	0.000101783	57207.4
		Structural maintenance of chromosomes protein 1A OS=Homo sapiens GN=SMC1A PE=1 SV=2	SMC1A	4	128.76	0	3.57852e-08	1.5824e-05	0	0	0.000139368	1.18473e-06	1.97965e-06	7.1506e-06	3.09073e-07	0.000397886	6.36968e-05	1.28485e-06	4.86607e-05	0.00023765	0.000127506	9.83215e-05	5.90877e-05	3.08159e-05	2.13558e-05	4.36677e-05	0	3.70789e-05	2.70524e-07	6.89716e-07	4.15758e-05	6.68176e-05	9.30354e-05	0.000100418	7.13377e-05	6.09578e-05	9.4523e-05	4.35796e-05	143240
		Olfactomedin-like protein 3 OS=Homo sapiens GN=OLFML3 PE=2 SV=1	OLFML3	6	128.43	0.0011415	5.09551e-05	0.00010778	0	0	0.00011453	4.71052e-05	8.7842e-05	3.46776e-05	0	3.04138e-05	1.91545e-05	2.27121e-05	0.000255401	0.000201023	0.00012344	0.000141895	0.000232515	0.00022838	0.000179869	0.000255532	0	0.000102218	0	4.21386e-05	0.000103248	0.000196551	0.000244375	0.000369657	9.88418e-05	0.000123687	0.000415886	0.000447286	46010.8
		HLA class I histocompatibility antigen, B-81 alpha chain OS=Homo sapiens GN=HLA-B PE=1 SV=1	HLA-B	1	128.36	0	0	0	0	0	0	0	0	0	0	0	0	0	4.13049e-05	0.000204993	2.32322e-05	0.000195648	1.08454e-06	0	0	0	0	0	0	0	0	3.22708e-06	1.86028e-06	6.63196e-06	0	0	3.09795e-06	0	40399.4
		Translocon-associated protein subunit alpha OS=Homo sapiens GN=SSR1 PE=1 SV=3	SSR1	6	128.18	8.18158e-06	0	4.32635e-06	8.79258e-06	0	1.16651e-05	1.97372e-06	0.000128676	5.87127e-05	0	3.1157e-05	3.07574e-05	6.74944e-05	0.000139822	0.000237741	0.00017678	0.000200471	4.67145e-05	1.39501e-05	5.14883e-05	2.46911e-05	0	7.98936e-05	6.83027e-05	0.000101104	8.83463e-07	4.51608e-05	9.65482e-05	8.8753e-05	8.19755e-05	8.43844e-05	5.69139e-05	0.000186396	32235.6
		PDZ and LIM domain protein 5 OS=Homo sapiens GN=PDLIM5 PE=1 SV=5	PDLIM5	3	127.95	0	0	0	0	0	0	0	0	0	0	9.10231e-07	6.3349e-06	0	2.72535e-05	2.40317e-06	8.19436e-06	2.94814e-05	0	0	0	0	9.40447e-06	0	4.50875e-07	0	0	0	6.00945e-07	3.0905e-07	0	4.85878e-05	1.37123e-07	0	63944.7
		6-phosphogluconate dehydrogenase, decarboxylating OS=Homo sapiens GN=PGD PE=1 SV=3	PGD	5	127.86	0	4.38501e-06	7.07103e-05	0	5.49103e-05	1.36149e-05	2.65785e-05	9.92312e-06	1.47077e-05	0	1.02854e-05	2.87485e-05	1.90747e-05	2.20187e-05	2.79642e-05	4.72777e-05	0.000715827	4.35395e-06	8.38754e-06	5.25064e-06	1.56492e-07	0.0001616	9.30236e-06	0	3.71893e-05	1.3409e-05	1.47957e-05	0.000215835	1.75478e-06	5.8635e-06	2.40521e-06	7.88149e-06	0.000115804	53141.7
		Dihydrolipoyllysine-residue acetyltransferase component of pyruvate dehydrogenase complex, mitochondrial OS=Homo sapiens GN=DLAT PE=1 SV=3	DLAT	5	127.56	0	3.19055e-05	0.000151659	0	0	0	5.90823e-07	8.85031e-07	0	0	2.51884e-06	2.41617e-07	0	0.000169747	0.000187879	0.000187318	0.000116159	0.000100547	4.20122e-05	0.000127672	0.000172408	3.38362e-06	0.000140098	3.37651e-05	1.35914e-07	0	0.000109672	0.000147329	0.000159829	1.28758e-05	1.06632e-05	0.000103217	4.15938e-05	68998.7
		Cytochrome c oxidase subunit 2 OS=Homo sapiens GN=MT-CO2 PE=1 SV=1	MT-CO2	5	127.43	0.000794502	0.000106944	0.000122748	0	0	0	9.87383e-05	0.000127505	0.000109749	0	2.30368e-05	0.000136139	7.50722e-05	0.000148937	0.000579509	0.000303017	0.000313561	0.000145905	0.000137662	0.000185734	0.000271573	0	0.000422458	1.25594e-05	0.000125829	2.52438e-07	0.00013608	0.000134328	0.00026235	0	0.000267282	0.000296405	0.000247812	25565.2
		Signal transducer and activator of transcription 1-alpha/beta OS=Homo sapiens GN=STAT1 PE=1 SV=2	STAT1	6	127.03	0	0	2.42201e-06	1.80238e-05	1.4579e-05	0	0	2.99307e-05	4.61867e-05	2.49566e-06	0	0	1.67349e-06	4.94115e-05	0.00010929	7.38319e-05	0.000147467	3.76287e-05	1.08507e-05	3.17189e-05	2.66808e-05	0	5.205e-06	0	3.7763e-06	1.88177e-05	9.92967e-05	2.98159e-05	4.17826e-05	3.99638e-05	4.91664e-06	2.69286e-05	1.09694e-05	87337.9
		Plasma membrane calcium-transporting ATPase 2 OS=Homo sapiens GN=ATP2B2 PE=1 SV=2	ATP2B2	2	126.69	0	0	4.13521e-05	0	0	1.11859e-05	7.81552e-05	4.3653e-05	7.99476e-05	0	0	6.64718e-05	2.14587e-05	1.69247e-05	6.66891e-05	2.60355e-05	1.29973e-05	2.59133e-06	0	1.04498e-05	1.51822e-05	0	6.36494e-05	0	9.86392e-05	1.44056e-05	0	2.57266e-06	8.19485e-08	3.87149e-05	9.37208e-06	2.30109e-06	1.3724e-05	136883
		NADH-cytochrome b5 reductase 1 OS=Homo sapiens GN=CYB5R1 PE=1 SV=1	CYB5R1	7	126.04	0	2.69675e-07	9.63819e-06	0.0203652	0	2.24736e-05	0.000216021	0.000146647	0.0002062	0.000605808	2.23522e-07	3.0197e-05	9.68153e-05	7.42473e-05	0.000212965	6.67306e-05	0.000112449	3.40618e-05	4.31686e-05	2.79988e-05	5.5637e-05	4.86147e-06	5.45055e-05	1.01028e-05	1.2941e-05	0.000106123	7.50924e-05	5.57793e-05	2.25625e-05	1.9742e-05	0.000197438	3.04666e-05	1.29827e-05	34095.6
		PDZ and LIM domain protein 1 OS=Homo sapiens GN=PDLIM1 PE=1 SV=4	PDLIM1	3	126	0	1.41694e-07	1.10577e-07	0	0	0	2.07652e-07	0	1.15584e-05	0	0	2.26428e-05	2.96088e-06	3.7797e-05	1.12382e-05	1.17432e-05	3.38236e-05	0	0	3.30417e-06	0	0	5.34715e-07	1.21832e-07	5.01e-06	0	1.98225e-06	0	0	3.23373e-05	9.15132e-06	6.88117e-06	9.01857e-06	36070.9
		Actin-related protein 2/3 complex subunit 3 OS=Homo sapiens GN=ARPC3 PE=1 SV=3	ARPC3	3	125.96	2.45081e-05	1.01252e-05	1.11011e-06	0.00122729	0	2.856e-07	8.43515e-05	0	0.000130101	0	0	0	0	4.38802e-05	0.000131637	1.02996e-05	0.000124894	2.02256e-06	1.24776e-06	3.76905e-05	0.000100744	0	5.55927e-05	3.84282e-06	5.4789e-06	9.28275e-08	1.6859e-05	9.36865e-06	7.13957e-06	0	4.40229e-08	0	4.63353e-05	20546.2
		Chloride intracellular channel protein 1 OS=Homo sapiens GN=CLIC1 PE=1 SV=4	CLIC1	4	125.95	0	1.82192e-05	7.49614e-05	0	0	0	0	1.17956e-06	1.27212e-06	1.55127e-05	0	2.28476e-06	9.9809e-08	0.000252631	0.000159499	0.000266374	6.56576e-05	3.04718e-05	9.21865e-06	8.11706e-06	1.01798e-05	0	1.37939e-05	0	2.72442e-06	0	3.5777e-05	3.28315e-05	1.51787e-05	0	4.88179e-07	3.1409e-05	6.52382e-06	26922.4
		Thy-1 membrane glycoprotein OS=Homo sapiens GN=THY1 PE=1 SV=2	THY1	3	125.49	0	1.41983e-06	1.35749e-05	1.40212e-05	0	0	0	0	0	3.45542e-05	0	0	2.38602e-06	0.000194473	8.62535e-05	0.000102199	0.000116641	4.74547e-05	6.07621e-05	5.5395e-05	8.77897e-05	0	5.50787e-05	9.03158e-06	0	9.35431e-06	8.56312e-05	0.000106156	0.000103235	1.6125e-06	3.69359e-05	6.93864e-05	4.92414e-05	17933.9
		Alpha-crystallin B chain OS=Homo sapiens GN=CRYAB PE=1 SV=2	CRYAB	4	125.47	0	4.66309e-05	6.9158e-05	0	0	0	4.90677e-05	0	1.12789e-05	0	0	5.49833e-07	0	0.000232176	2.56209e-05	0.000327182	4.65893e-05	2.58625e-06	3.68063e-05	4.68483e-06	3.85633e-05	0	4.83927e-06	4.9842e-06	0	5.11691e-05	0.000111881	3.79105e-06	3.14711e-05	0	0	8.96069e-06	2.95826e-07	20158.1
		Interferon-induced GTP-binding protein Mx1 OS=Homo sapiens GN=MX1 PE=1 SV=4	MX1	4	125.13	4.96835e-07	1.60404e-05	0	0	0.036779	7.18886e-06	0	1.01526e-07	0	0	0	0	0	3.60257e-06	7.81305e-05	1.51147e-05	8.26271e-05	0.000143438	6.31009e-07	5.30592e-07	2.26371e-07	4.02979e-07	1.30122e-06	6.04345e-06	0	5.62673e-07	0.000238731	0.000121708	3.04953e-07	1.16509e-07	3.15687e-05	4.35776e-07	1.50923e-05	75523.3
		Actin-related protein 2 OS=Homo sapiens GN=ACTR2 PE=1 SV=1	ACTR2	7	124.89	0.0261791	2.51523e-05	0.000100891	1.57907e-06	0	0.000125352	0.000155625	0.000236195	0.000200631	0	0.000103106	0.000225728	0.000276654	0.000187735	0.000229586	0.000201368	0.000386407	0.000359696	7.37249e-05	0.000175522	0.000128372	7.47629e-07	0.000117139	2.52907e-05	0	0.000195707	0.00031586	0.000165359	0.000199498	0.00021626	0.000231261	0.000256805	0.00031004	119894
		Integrin beta-2 OS=Homo sapiens GN=ITGB2 PE=1 SV=2	ITGB2	4	124.89	0	0	6.40292e-06	3.49799e-06	0	0	2.11945e-06	9.72043e-05	4.64613e-06	0	0.000107106	2.0563e-05	9.16709e-05	1.01542e-05	2.39284e-05	1.47499e-05	3.83803e-05	7.7606e-05	5.15729e-05	0	1.94163e-05	0	8.47017e-06	0	8.09342e-05	6.02108e-06	3.6903e-05	1.31334e-05	1.14595e-05	1.11183e-06	9.54738e-07	4.99991e-05	7.73875e-06	84782.8
		60S ribosomal protein L21 OS=Homo sapiens GN=RPL21 PE=1 SV=2	RPL21	4	124.61	2.81251e-07	5.69524e-06	2.41289e-05	0	0	0	0	8.48288e-06	0	0	1.6233e-06	6.22331e-07	1.44669e-05	3.52464e-05	1.45907e-05	3.2585e-05	4.31102e-05	6.53707e-05	0	4.53731e-06	0	0	1.59806e-05	1.04361e-06	0	0	5.71553e-05	5.13688e-06	1.5989e-05	8.60343e-08	5.38026e-06	4.40892e-05	9.2357e-06	18563.9
Matrisome-associated	ECM Regulators	Neutrophil elastase OS=Homo sapiens GN=ELANE PE=1 SV=1	ELANE	3	124.36	0	0	0	0	0	1.57251e-07	9.79242e-05	0.000622656	1.78243e-05	9.9831e-05	0.00222806	0.000100584	0.00211542	0	0	1.32497e-06	7.27836e-07	8.55466e-07	0.00035335	1.01665e-06	0.000113117	0	1.87911e-05	0	0.00223544	0	0	2.36083e-07	1.60675e-07	2.16141e-07	9.11316e-05	0	8.89961e-07	28517.2
		Macrophage migration inhibitory factor OS=Homo sapiens GN=MIF PE=1 SV=4	MIF	2	124.32	0	8.60047e-08	1.22036e-05	1.71583e-06	0	1.5505e-06	0	7.27422e-07	1.47495e-07	4.83596e-07	0	1.15783e-06	6.42651e-07	0.00067532	0.000202651	0.00019293	0.000285162	3.7e-07	1.62802e-07	6.43158e-07	2.08069e-06	2.80462e-07	0	0	0	3.82971e-07	1.50361e-06	1.71441e-07	3.50924e-06	3.10091e-07	2.62998e-06	2.33858e-06	9.1334e-06	12475
		Lymphocyte-specific protein 1 OS=Homo sapiens GN=LSP1 PE=1 SV=1	LSP1	2	124.12	0	2.82113e-05	0	0	0.00556079	5.03577e-06	0	7.54259e-06	0	0	0	0	2.62444e-07	1.47796e-05	1.32701e-05	3.25341e-06	5.87506e-05	1.99724e-05	1.74239e-05	2.62063e-05	1.79041e-05	0	5.42338e-06	0	3.03899e-05	9.32906e-07	2.2354e-05	4.0934e-05	0	2.08126e-06	4.33905e-05	4.55203e-05	2.4548e-05	37190.2
		Activated RNA polymerase II transcriptional coactivator p15 OS=Homo sapiens GN=SUB1 PE=1 SV=3	SUB1	3	124.06	4.30671e-06	5.76724e-06	4.50646e-06	7.36534e-06	0	0	4.60596e-05	4.30075e-05	0.000105349	0	6.0926e-05	4.30064e-05	0.000187657	0.000193528	0.000744941	0.000194805	0.000215283	9.03391e-05	1.85841e-05	1.65363e-05	2.66552e-05	5.4492e-05	3.62221e-05	0	9.21091e-05	1.06818e-05	0.000226519	0.000234732	0.000264797	0.000213677	5.03451e-05	0.000212493	5.88849e-05	14394.4
Core matrisome	Collagens	Collagen alpha-1(XV) chain OS=Homo sapiens GN=COL15A1 PE=1 SV=2	COL15A1	6	123.73	0.000260962	0.000363067	0.000400802	0	0	0.000107218	0.000385677	1.06868e-05	0.000656728	0	5.81971e-05	0.00089283	0.000261687	1.53838e-05	1.89858e-05	4.7482e-06	7.44336e-05	1.54477e-05	0.000202802	0.00011838	0.000238785	0.000219976	0.00087981	0.000225106	0.000482414	0.000222656	2.52101e-05	3.67916e-05	9.38092e-05	0.000383667	0.000158894	2.50482e-05	1.40817e-05	141725
Matrisome-associated	ECM-affiliated Proteins	Galectin-3 OS=Homo sapiens GN=LGALS3 PE=1 SV=5	LGALS3	8	123.7	0	0	0	5.74693e-07	0	2.00538e-06	1.87063e-05	2.49819e-05	4.01548e-06	0	3.32307e-05	7.09817e-05	8.63613e-06	0.000397033	0.000368513	0.00015405	0.000234658	5.85299e-05	4.82921e-06	0	0	0	0	1.19358e-05	1.24254e-05	1.66102e-05	0.000331865	0.000179767	6.21839e-06	7.4764e-05	1.37413e-06	5.60599e-05	0	26151.7
		Arginine--tRNA ligase, cytoplasmic OS=Homo sapiens GN=RARS PE=1 SV=2	RARS	4	123.668	0	0	0	0	0.0149639	0	1.24549e-06	0.000290933	2.954e-07	0	0	8.72534e-05	0	6.44555e-06	6.50357e-06	4.50259e-06	4.33328e-05	0	0	0	4.79818e-07	0	4.78112e-07	0	0	0.00027061	3.27471e-07	8.26712e-08	3.13577e-07	0.000220261	4.09148e-06	2.66079e-07	0	75382.7
		Histone H2B type 1-A OS=Homo sapiens GN=HIST1H2BA PE=1 SV=3	HIST1H2BA	6	123.38	0	0.00865185	0.0123944	0	0.000559321	0.0211095	0.0227663	0.0353004	0.0290929	0	0.0274404	0.0247479	0.0268911	0.00194564	0.0235214	0.0177392	0.0255118	0.0226612	0.0241448	0.0115177	0.0275481	0.00201872	0.0232696	0.0012926	0.000516293	0.0161157	0.0237158	0.032562	0.0352078	0.0218114	0.0274619	0.0408254	0.0257779	14166.6
		Four and a half LIM domains protein 1 OS=Homo sapiens GN=FHL1 PE=1 SV=4	FHL1	5	123.36	0	0.000390306	0.000374779	6.69874e-05	0	8.23497e-05	0.000853345	7.68008e-05	0.000428627	0.000686368	7.88869e-05	0.000566315	0.000136523	5.83339e-05	1.73399e-05	5.03659e-05	1.96963e-05	2.77699e-05	0.000100056	0.00012424	0.000114451	4.56605e-05	7.2843e-05	6.46287e-05	0.000125046	0.000330407	0.000100924	1.58546e-05	4.84503e-05	3.42455e-05	3.40579e-05	4.93468e-05	6.2707e-06	36261.5
		Small nuclear ribonucleoprotein Sm D2 OS=Homo sapiens GN=SNRPD2 PE=1 SV=1	SNRPD2	4	123.36	0	1.29464e-06	8.11053e-06	0.0147246	0.00160601	8.62395e-05	7.73157e-05	0.000119617	7.75516e-05	0.000211374	0.000298229	5.47353e-05	3.8899e-05	7.89337e-05	0.000246361	8.40539e-05	0.000258008	9.22502e-05	0.00030912	0.000422817	0.000197086	5.71026e-05	1.53066e-05	1.19268e-06	4.29781e-05	0.000144385	0.000112296	7.24632e-05	0.000120374	4.5038e-05	5.86046e-05	7.85735e-06	0.000141325	13525.8
		Epoxide hydrolase 1 OS=Homo sapiens GN=EPHX1 PE=1 SV=1	EPHX1	7	123.14	0	2.7053e-06	0.000189998	1.05264e-05	0	0.000295976	0.000563688	0.000594844	0.000319369	0.000277112	4.53074e-05	0.000461131	0.000225516	0.000125011	0.000166911	6.66491e-05	0.000206429	0.00015517	0.000429096	0.000286297	0.000582679	7.5705e-05	0.000105263	0.000152903	0.000303734	0.000168079	0.000333277	0.000180518	0.000187023	4.36293e-05	8.62591e-05	7.66144e-05	3.49303e-05	52950.7
		2',3'-cyclic-nucleotide 3'-phosphodiesterase OS=Homo sapiens GN=CNP PE=1 SV=2	CNP	5	123.101	0	3.12952e-06	7.75637e-06	5.84129e-05	0	0	7.14842e-06	3.52041e-05	3.2428e-05	0	0	2.31617e-05	1.05551e-05	4.56345e-05	0.00011973	5.42719e-05	6.52873e-05	8.92839e-06	7.91549e-06	8.56619e-06	1.02324e-05	0	1.88856e-05	0	1.03693e-05	5.6784e-06	1.47895e-05	1.61004e-05	1.13117e-05	8.12995e-07	0.000533134	1.17368e-05	5.4665e-06	47580.1
		NHP2-like protein 1 OS=Homo sapiens GN=NHP2L1 PE=1 SV=3	NHP2L1	3	122.94	0	0	1.34164e-05	0	0	5.97448e-05	3.16187e-05	5.38453e-05	5.97704e-05	2.5419e-06	0	4.4416e-05	1.53962e-05	0.00015597	0.000664054	0.000140488	0.000258713	5.04747e-05	3.07622e-06	2.05827e-05	1.85881e-05	7.21034e-06	3.62406e-05	0	4.64603e-05	4.40015e-05	7.87009e-05	0.000225829	0.000146018	0	4.33835e-05	0.000150246	5.10099e-05	14172.5
		Platelet endothelial cell adhesion molecule OS=Homo sapiens GN=PECAM1 PE=1 SV=1	PECAM1	5	122.69	3.22894e-06	5.86835e-06	8.28092e-05	0	0	4.43241e-05	7.79509e-05	0.000208406	0.000103473	0.000230871	5.77007e-05	0.000177622	0.000127304	4.27028e-06	1.33163e-05	8.81345e-06	1.14199e-05	3.735e-05	0.000148969	5.30767e-05	0.000111015	0	0.000150725	0.000661551	0.000175648	3.54316e-05	2.67755e-05	0	2.75435e-05	0.00011598	5.89757e-05	2.27542e-05	3.12163e-06	82538.2
		ATP synthase subunit f, mitochondrial OS=Homo sapiens GN=ATP5J2 PE=1 SV=3	ATP5J2	3	122.44	0	2.22459e-06	1.92745e-06	0	0	1.24754e-05	1.65383e-07	1.24871e-06	1.145e-06	0	0	9.08628e-07	3.5753e-07	6.7017e-05	0.000280007	4.4877e-05	0.000104694	1.04578e-05	1.02521e-06	7.93056e-06	5.78763e-06	1.61784e-06	2.66092e-06	1.06611e-06	0	2.16324e-06	6.21838e-06	1.98666e-05	7.82174e-06	1.57035e-06	4.16643e-07	8.59278e-07	6.84128e-07	10916.8
		Neutrophil defensin 3 OS=Homo sapiens GN=DEFA3 PE=1 SV=1	DEFA3	3	122.41	0	0.000449898	0	0.000818531	0	9.33498e-05	0.000622155	0.000642194	0.000273737	0	0.0254708	0.000427522	0.00609204	0.000174028	0.000213505	0.000244153	0.000114045	7.32305e-05	0.00509036	0.00342285	0.00103429	0.000688671	0.00011979	0	0.00469683	2.80924e-05	5.91681e-05	0.0018892	5.75885e-05	5.12611e-05	0.000669953	1.43506e-05	3.40815e-05	10243.4
		Dynamin-1-like protein OS=Homo sapiens GN=DNM1L PE=1 SV=2	DNM1L	2	122.36	0.000141182	8.25875e-08	0	0	0	0	0	0	0	0	0	8.32964e-08	0	4.72601e-06	1.24486e-05	1.28581e-06	2.78817e-06	2.22219e-07	3.18859e-07	4.28467e-07	0	0	0	5.33914e-08	0	0	9.37922e-07	6.4945e-07	0	5.02564e-07	0	0	1.90495e-07	81880.8
		40S ribosomal protein S12 OS=Homo sapiens GN=RPS12 PE=1 SV=3	RPS12	5	122.36	2.19737e-06	9.54704e-07	1.48603e-05	0	0	2.53769e-05	3.6558e-05	9.62259e-05	4.26211e-05	9.1891e-07	7.27688e-06	3.54015e-05	6.87649e-06	0.000358252	0.000394594	0.000293275	0.000267742	4.16943e-05	3.70732e-05	1.36849e-05	2.53108e-05	0	2.65599e-05	2.34064e-06	5.61614e-06	8.68572e-05	0.000196336	0.00013568	8.5192e-05	5.83703e-05	4.06954e-05	7.89244e-05	4.69744e-05	14513.7
		NADH dehydrogenase [ubiquinone] iron-sulfur protein 8, mitochondrial OS=Homo sapiens GN=NDUFS8 PE=1 SV=1	NDUFS8	2	122.35	0	0	1.65353e-05	0	0	0	2.5691e-07	0	1.45977e-05	0	3.38922e-06	1.88474e-05	0	2.93071e-05	5.75714e-05	8.89708e-06	1.92047e-05	5.49102e-06	0	0	0	2.64293e-06	2.97514e-05	1.66515e-05	0	0	0	7.15918e-06	1.37115e-05	3.80231e-07	0	0	4.33998e-06	23704.3
		Glutathione peroxidase 3 OS=Homo sapiens GN=GPX3 PE=1 SV=2	GPX3	5	122.27	2.15898e-06	3.40276e-05	0.00014221	0	0	7.29398e-05	0.000330969	0.000108518	6.49392e-05	0	9.526e-05	0.000260045	0.000328402	0.000372418	0.00011937	4.46865e-05	2.20525e-05	0.000381184	0.000266286	0.000117318	3.46582e-05	0.00191912	0.00021205	0	0.000342825	0.000167755	0.000162782	0.000249656	6.36749e-05	0.000117744	4.76009e-05	0.000311273	7.71056e-05	25565.2
		Spliceosome RNA helicase DDX39B OS=Homo sapiens GN=DDX39B PE=1 SV=1	DDX39B	2	121.86	0	7.22668e-08	0	0	0	0	0	0	0	4.49986e-05	0	0	0	2.85051e-05	7.7158e-05	2.71196e-05	5.16659e-05	0	0	0	0	0	0	0	0	7.12011e-07	8.18689e-06	1.30363e-05	7.87715e-06	0	0	0	4.5477e-06	48992.4
		Alpha-1B-glycoprotein OS=Homo sapiens GN=A1BG PE=1 SV=4	A1BG	8	121.8	0	0	3.80393e-05	1.68784e-06	0	4.99374e-07	5.75659e-05	9.08616e-06	4.22102e-05	5.47745e-05	1.00359e-06	2.14088e-05	1.59281e-06	0.000139555	0.000127932	0.000107386	0.000150496	0.000110803	5.04774e-05	4.48923e-05	1.84487e-05	6.1324e-07	0.00018035	0.000100841	0.000108312	3.63145e-05	4.36272e-05	3.62087e-05	6.97298e-05	5.34616e-05	5.19601e-05	7.37362e-05	7.42972e-05	54253.8
		Nicotinamide N-methyltransferase OS=Homo sapiens GN=NNMT PE=1 SV=1	NNMT	3	121.62	0	2.21334e-07	2.6701e-07	0	0	0	0	0	0	0	0	0	0	5.21296e-05	4.99526e-07	7.47939e-05	7.17537e-07	0	5.77614e-05	0	0	0	1.49473e-06	0	0	0	0	0	6.6343e-07	7.48814e-08	1.17436e-05	4.87423e-06	6.23287e-06	29574.2
		Methylated-DNA--protein-cysteine methyltransferase OS=Homo sapiens GN=MGMT PE=1 SV=1	MGMT	2	121.13	0	0	0	0	0	0	0.000153361	0	0	0	8.4051e-06	0	0	2.64517e-06	4.89324e-06	1.4855e-06	2.85057e-05	0	0	0	0	0	0	0	0	0	0	4.3555e-07	1.66057e-06	1.057e-07	0	2.98469e-07	0	21644.9
		U2 small nuclear ribonucleoprotein A' OS=Homo sapiens GN=SNRPA1 PE=1 SV=2	SNRPA1	2	121.05	0	0.000629589	3.03101e-07	6.72294e-05	0	0	2.28971e-06	0	3.42778e-07	0	0	8.11637e-07	0	2.61072e-05	7.65686e-05	1.99605e-05	3.29011e-05	2.73935e-06	7.84856e-07	4.55052e-07	0	0	2.79587e-06	0	1.02551e-06	4.9932e-06	4.75846e-06	4.29371e-06	2.32451e-06	0	9.57148e-06	0	2.00116e-05	28416
		Zyxin OS=Homo sapiens GN=ZYX PE=1 SV=1	ZYX	3	121.03	2.03847e-06	0	2.83477e-06	0	0	0	1.81766e-06	0	0	6.75769e-06	0	2.41734e-05	0	3.86051e-05	4.52689e-06	8.75508e-06	3.68596e-05	1.41979e-06	0	0	2.39826e-07	3.10771e-05	0	2.14391e-06	0	0	4.23991e-07	0	1.6397e-06	0	0	3.6445e-08	4.35553e-05	61276.3
		Integrin beta-5 OS=Homo sapiens GN=ITGB5 PE=1 SV=1	ITGB5	4	120.45	0	0.00106591	0.000771083	0	0.00248188	0.000482125	0.0020407	0.00292712	0.00360873	0	0.00384056	0.00134356	0.00244779	0.000274869	0.000303275	0.000200821	0.00028601	0.000214347	0.00153809	0.000967173	0.000668896	0.000157745	0.000901838	0.00100423	0.00332098	0.00048828	0.000706725	0.00032987	0.000181969	9.3956e-05	0.000391242	7.01775e-05	0.000551635	88055.5
		Mitochondrial import receptor subunit TOM70 OS=Homo sapiens GN=TOMM70A PE=1 SV=1	TOMM70A	3	119.71	0	0	0	0	0	9.33546e-07	4.28895e-06	2.48682e-07	6.6459e-08	0	0	5.41256e-07	0	1.73867e-05	6.8175e-05	2.14343e-05	6.36407e-05	9.67237e-07	4.11265e-07	0	9.66479e-08	0	0	0	0	2.71589e-08	1.74456e-06	1.63044e-06	1.96836e-06	0	5.9478e-08	2.01757e-07	1.10946e-07	67457
		40S ribosomal protein S16 OS=Homo sapiens GN=RPS16 PE=1 SV=2	RPS16	4	119.25	0	3.34161e-05	4.09856e-05	0	0	8.04515e-05	0.000141043	0.000191865	0.00013659	4.18494e-07	9.10624e-07	5.98163e-05	1.54597e-05	0.000184659	0.000225015	0.000191174	0.000170216	0.000191887	8.2073e-05	9.96957e-05	0.000127485	0	0.000114534	0.000413251	2.62381e-05	8.77618e-05	0.000155414	0.000122406	0.000321452	2.13433e-05	9.68519e-05	0.000264183	0.000189486	16444.7
		60S ribosomal protein L27a OS=Homo sapiens GN=RPL27A PE=1 SV=2	RPL27A	3	119.16	0	0	4.14992e-05	6.61178e-05	0	0.000273124	0.000219169	2.57977e-05	0.000236007	0	0	1.49947e-05	0	0.00021262	0.000298142	0.000233628	0.000242342	0.000465729	2.23489e-05	0.000181532	2.14928e-05	0	2.43904e-05	3.04494e-05	1.69009e-05	0.000186819	0.00034536	0.000251573	0.000376507	1.7908e-05	5.47972e-05	0.000312618	5.62884e-05	16560.2
		Protein FAM3C OS=Homo sapiens GN=FAM3C PE=1 SV=1	FAM3C	2	119.03	0	3.0675e-06	1.69854e-06	0	0	0	4.70088e-07	0	2.29748e-07	0	0	0	0	4.06543e-05	7.03071e-05	3.39102e-05	4.39581e-05	5.24915e-06	6.04532e-07	4.21202e-06	1.36548e-06	0	0	4.01503e-06	9.47722e-07	3.925e-05	9.23459e-06	2.23209e-05	1.53872e-05	2.49558e-05	0	7.89032e-06	1.16307e-05	24680.1
		C-type mannose receptor 2 OS=Homo sapiens GN=MRC2 PE=1 SV=2	MRC2	3	118.82	0	0	1.63317e-06	0	0	0	0	0	7.41122e-05	0	0.000388889	2.19567e-05	0	3.37444e-05	1.27851e-05	4.2146e-05	6.2118e-05	5.91597e-05	0.000112796	1.8628e-05	0.000219549	0	1.06995e-07	6.36548e-07	8.55451e-05	5.48033e-07	1.07365e-05	2.61186e-05	1.07889e-05	0.000357423	0	3.74584e-06	1.00164e-05	132883
		MOSC domain-containing protein 1, mitochondrial OS=Homo sapiens GN=MARC1 PE=1 SV=1	2001-03-01	1	118.75	2.12098e-06	0	8.54927e-06	0	0	0	0	0	0	7.52789e-06	0	0	0	2.49998e-07	4.98227e-07	1.03184e-07	0	0	3.70067e-06	0	2.4565e-05	0	3.99987e-05	0	0	0	0	3.82998e-07	6.79698e-06	1.51702e-05	1.1199e-06	4.86329e-07	0	37499.7
		Guanine nucleotide-binding protein G(k) subunit alpha OS=Homo sapiens GN=GNAI3 PE=1 SV=3	GNAI3	2	118.667	0	6.20347e-06	8.6564e-05	0	0	7.63348e-05	0.000298872	0.000141989	0.000181239	0	0.000113544	0.000233047	0.000312281	7.15532e-05	8.98645e-05	6.93921e-05	3.78395e-05	0.000108655	9.70512e-05	5.42389e-05	0.000126942	2.07673e-05	0.000199523	3.84106e-05	0.000339036	4.50882e-05	6.20667e-05	7.474e-05	7.74989e-05	0.000148524	8.4494e-05	0.000103207	5.82273e-05	40532.9
		Liver carboxylesterase 1 OS=Homo sapiens GN=CES1 PE=1 SV=2	CES1	4	118.65	0	5.18209e-05	2.85202e-05	3.66178e-06	0	0	6.50899e-05	9.22406e-07	6.15443e-06	2.50032e-05	5.87531e-07	0.000132279	0	3.03502e-05	6.66706e-06	1.23548e-05	2.00735e-06	1.85152e-06	5.70041e-05	1.7887e-05	9.0248e-05	0	8.889e-05	1.68743e-06	8.33994e-05	1.16266e-06	3.91885e-05	6.53531e-06	1.10419e-06	9.97166e-07	5.40974e-06	7.61531e-06	0	67686
		40S ribosomal protein S14 OS=Homo sapiens GN=RPS14 PE=1 SV=3	RPS14	4	118.53	0.000567515	1.64702e-05	0.000135994	8.26295e-07	0	9.00397e-05	0.000121708	0.000118522	0.000128499	2.4958e-06	2.95329e-06	2.03288e-06	8.73551e-06	0.0002474	0.000330166	0.000356407	0.00014841	0.000325538	3.47558e-05	8.57325e-05	2.3393e-05	9.83064e-07	8.33774e-05	0.00170485	3.72541e-05	0.000123128	0.000190498	0.000124517	0.000172138	2.07521e-05	0.000149089	0.00015095	0.000141037	16271.6
		Splicing factor 3B subunit 2 OS=Homo sapiens GN=SF3B2 PE=1 SV=2	SF3B2	6	118.33	0	1.52537e-06	7.32456e-06	0	0	0	0	5.61242e-06	1.79689e-06	5.56096e-05	0	6.50068e-06	1.75729e-05	5.08302e-05	0.000192055	3.75668e-05	4.0067e-05	6.411e-06	8.12168e-07	3.84549e-06	1.72189e-06	0	2.77132e-06	1.68555e-05	8.69919e-06	5.5974e-06	9.00967e-06	1.95902e-05	2.59319e-05	6.06036e-06	1.76024e-05	2.21447e-05	5.24003e-05	100230
		Intercellular adhesion molecule 1 OS=Homo sapiens GN=ICAM1 PE=1 SV=2	ICAM1	3	117.67	0	3.09807e-07	1.8662e-05	5.62585e-06	0	0	5.61205e-07	0	4.96486e-07	4.89367e-06	0	0	2.92586e-07	4.70594e-05	2.68504e-05	4.14101e-05	5.38117e-05	7.04121e-05	3.73472e-05	2.50496e-05	4.25837e-05	0	7.88093e-05	0	0	0	3.4551e-05	3.49511e-05	3.50648e-05	0	1.55934e-05	4.99031e-05	3.11427e-05	57825.7
		Adenosylhomocysteinase OS=Homo sapiens GN=AHCY PE=1 SV=4	AHCY	4	117.49	5.18152e-05	5.14667e-05	9.9119e-05	0.00072688	0	0.000147732	7.23169e-06	0.000231526	0.000281405	0	0	0.000774498	0.000348205	9.78688e-05	9.70246e-05	6.93747e-05	1.15303e-05	9.3291e-05	9.20647e-05	5.19685e-05	1.59616e-05	0	1.71061e-05	7.9806e-05	6.43082e-07	1.73633e-05	3.23921e-05	4.17699e-05	2.29057e-05	3.61301e-05	1.11814e-06	3.89856e-05	1.37811e-05	47717.1
		NADH dehydrogenase [ubiquinone] 1 alpha subcomplex subunit 4 OS=Homo sapiens GN=NDUFA4 PE=1 SV=1	NDUFA4	3	117.31	0	6.18333e-07	5.0893e-05	3.76996e-06	8.51542e-06	3.99581e-07	2.19318e-06	5.39061e-07	1.41598e-06	0	3.19501e-06	6.14658e-05	2.12714e-07	7.81465e-05	0.00027809	0.000137368	0.000110935	3.52842e-06	1.33207e-06	1.58498e-07	3.13917e-07	2.14784e-06	5.29365e-06	4.49557e-06	0	4.81621e-07	1.34108e-05	1.23134e-05	4.36711e-06	0	0	7.25169e-06	8.31727e-07	9368.7
		Ras-related protein Rab-11B OS=Homo sapiens GN=RAB11B PE=1 SV=4	RAB11B	1	117.12	0	0	3.84288e-06	0	0	0	0	0	0	0	0	0	0	2.45816e-05	9.09276e-06	1.14809e-05	3.68393e-06	0	1.20256e-06	0	0	0	1.04878e-06	0	0	0	7.77539e-07	2.25035e-07	1.2881e-06	0	0	1.72713e-06	0	24488.1
		Heterogeneous nuclear ribonucleoprotein U-like protein 2 OS=Homo sapiens GN=HNRNPUL2 PE=1 SV=1	HNRNPUL2	3	116.687	0.000272058	1.91625e-06	2.3848e-05	5.25302e-06	0	1.89265e-06	5.83003e-06	0	6.79286e-06	0	0	0	0	7.53547e-05	0.0001479	7.99065e-05	2.79596e-05	5.22139e-05	4.79681e-06	9.48701e-06	3.21779e-06	0	0	3.70953e-06	1.3636e-06	1.65588e-05	5.90791e-05	7.63037e-05	0.00010777	0	0	7.26078e-05	2.57985e-06	85105.9
		Septin-6 OS=Homo sapiens GN=SEPT6 PE=1 SV=4	2006-09-01	1	116.66	0	0	0	0	0	0	4.79361e-06	0	0	0	0	0	0	3.71747e-05	5.83093e-06	1.06909e-05	1.19873e-05	0	0	0	0	0	0	0	0	0	6.43286e-07	0	0	0	0	0	0	49717.4
		Nascent polypeptide-associated complex subunit alpha OS=Homo sapiens GN=NACA PE=1 SV=1	NACA	3	116.65	2.48714e-06	0	2.18587e-05	5.53561e-06	0	0	8.76817e-06	0	1.92777e-05	0	0	3.65199e-06	2.94503e-06	6.14281e-05	9.99302e-05	6.76371e-05	6.85911e-05	1.93513e-05	7.21919e-08	1.71808e-07	0	0	2.34147e-06	0	4.72732e-06	0	2.6534e-05	5.55989e-06	1.0336e-05	9.21225e-07	2.60916e-06	2.07088e-05	1.11735e-05	23382.6
		GTP-binding nuclear protein Ran OS=Homo sapiens GN=RAN PE=1 SV=3	RAN	5	116.61	0	1.475e-05	0.000130045	0.00185039	0	0	2.32989e-06	6.36589e-06	4.29545e-06	0.000183129	8.87583e-07	1.33775e-05	5.00946e-06	0.000343137	0.000315108	0.000369033	0.000240877	1.81344e-05	8.9877e-06	4.28032e-06	1.0155e-05	0	4.06098e-05	3.83508e-06	1.48086e-05	4.54241e-05	4.80817e-05	8.70731e-05	3.67601e-05	1.17599e-05	1.0387e-05	6.50239e-05	0.000179054	24009.4
Matrisome-associated	Secreted Factors	Protein S100-A10 OS=Homo sapiens GN=S100A10 PE=1 SV=2	S100A10	4	116.51	0	0.000545547	0.000254691	1.55511e-06	0	3.91072e-06	0.0018128	0.00118064	0.00191278	0.000238601	7.58439e-07	0.00368917	0.00131758	0.00148671	0.000947482	0.000772741	0.000482607	0.000507501	0.000865562	0.000547911	0.000668933	0.000765263	0.00118132	7.78438e-06	1.33459e-05	0.00102828	0.000669142	0.000442	0.000767602	0.00117302	0.000906894	0.00110008	0.000589562	11201.9
		Inorganic pyrophosphatase OS=Homo sapiens GN=PPA1 PE=1 SV=2	PPA1	2	116.48	0	0	1.50293e-05	0	0	0	7.69448e-06	0	0	0	0	3.84394e-07	0	8.08785e-05	3.00697e-05	7.03498e-05	2.29964e-05	0	1.59897e-05	0	0	4.79588e-07	0	0	0	8.92001e-07	0	0	0	1.27821e-05	0	0	0	32659.9
		Dihydrolipoyllysine-residue succinyltransferase component of 2-oxoglutarate dehydrogenase complex, mitochondrial OS=Homo sapiens GN=DLST PE=1 SV=4	DLST	9	116.41	7.57707e-06	3.81628e-05	0.000264483	8.04587e-06	2.37685e-06	0.000100448	0.000450669	0.000176799	0.00013586	3.25573e-06	2.43685e-05	0.000107973	0.000127184	0.000224461	0.000344514	0.000219776	0.000164494	0.000127592	0.000121587	0.000104925	0.000124046	3.67195e-06	0.000666408	3.99078e-05	0.000123158	0.000126369	0.000107144	0.000172713	0.000190051	0.000118242	0.000140466	0.000242502	0.000159349	48756.1
Core matrisome	ECM Glycoproteins	Multimerin-2 OS=Homo sapiens GN=MMRN2 PE=1 SV=2	MMRN2	5	116.27	0	7.55799e-05	6.15452e-05	0	0	7.01154e-06	5.19867e-05	6.44578e-05	0.000105644	0	4.53549e-05	0.000142779	3.78738e-05	5.29049e-07	2.04418e-06	0	2.08371e-06	2.13522e-06	4.0224e-05	2.21358e-05	3.49131e-05	1.73104e-06	7.60508e-05	1.08213e-06	7.49606e-05	4.06772e-05	3.04169e-06	0	1.70947e-05	2.68014e-07	3.26863e-06	1.51425e-05	9.10138e-06	104410
		Heterogeneous nuclear ribonucleoprotein D-like OS=Homo sapiens GN=HNRPDL PE=1 SV=3	HNRPDL	2	116.21	0	9.63937e-08	7.4538e-06	0	0	0	3.8656e-06	0	1.06681e-05	0	1.15166e-06	2.3878e-05	0	5.72335e-05	0.000147776	5.50905e-05	0	4.72871e-05	0	7.72687e-06	0	2.36372e-05	2.83325e-05	0	0	1.64081e-05	3.06474e-05	8.31286e-05	7.29189e-05	3.77477e-05	1.66363e-05	0.000105538	3.9522e-05	46437.8
		Ribonuclease inhibitor OS=Homo sapiens GN=RNH1 PE=1 SV=2	RNH1	3	116.13	0	7.79612e-06	8.84635e-05	0	0	1.13579e-05	7.74438e-06	1.82739e-05	0	0	0	0	2.7259e-07	0.000128406	5.17673e-05	0.000121015	9.7217e-06	5.17179e-05	2.53556e-05	8.0227e-05	4.8762e-05	0	3.2507e-05	1.80733e-06	0	4.44993e-06	4.36584e-05	3.69078e-05	3.9078e-05	0	3.22642e-05	7.9094e-05	2.04215e-05	49974.2
		Alpha-adducin OS=Homo sapiens GN=ADD1 PE=1 SV=2	ADD1	1	116.11	0	7.17323e-06	1.56403e-05	0	0	0	0	0	0	0	0	1.68869e-06	0	7.78137e-06	1.69069e-05	9.12294e-06	4.11151e-06	1.00268e-05	9.99636e-06	1.41146e-05	1.84866e-05	0	3.75527e-05	0	0	0	4.32587e-06	1.60411e-05	1.63833e-05	7.89962e-06	2.8244e-05	1.26766e-05	2.15904e-05	80957.1
		V-type proton ATPase catalytic subunit A OS=Homo sapiens GN=ATP6V1A PE=1 SV=2	ATP6V1A	4	116.04	0	7.32076e-08	7.36673e-08	1.26993e-05	0	0	0	0	4.36748e-07	0	6.64073e-07	6.98888e-07	0	1.83357e-05	2.2119e-05	1.77939e-05	4.88829e-05	1.03765e-05	2.84966e-07	1.30652e-06	1.00412e-06	0	0	1.0062e-05	0	3.87048e-07	1.11277e-05	6.71396e-06	4.54436e-06	2.93832e-08	0	4.70709e-06	6.09213e-06	68306.7
Core matrisome	ECM Glycoproteins	Latent-transforming growth factor beta-binding protein 3 OS=Homo sapiens GN=LTBP3 PE=1 SV=4	LTBP3	3	115.96	0	8.84823e-07	4.40858e-07	0	0	5.13013e-06	0	0	0	0	0	0	9.88521e-07	1.35628e-06	0	0	5.26397e-06	2.20905e-05	5.75127e-07	0.000962604	0	9.23978e-06	0	0	0	8.03488e-06	1.56475e-05	1.05458e-05	1.9193e-05	0	0	6.07441e-06	1.53776e-05	139357
		Translocon-associated protein subunit delta OS=Homo sapiens GN=SSR4 PE=1 SV=1	SSR4	3	115.67	0.001858	1.53672e-06	2.65668e-06	0	0	0	3.9282e-06	0	5.92249e-06	0	9.78183e-07	9.30641e-06	5.4691e-07	8.90104e-05	0.000137696	0.000115768	0.000138301	2.82713e-05	4.86901e-07	2.04889e-05	1.66611e-06	0	1.29963e-05	7.03308e-06	4.25957e-06	5.30284e-07	3.38416e-05	3.32455e-05	3.39483e-05	0	1.29065e-05	2.27973e-05	4.17342e-05	18997.7
		NADH dehydrogenase [ubiquinone] flavoprotein 1, mitochondrial OS=Homo sapiens GN=NDUFV1 PE=1 SV=4	NDUFV1	4	115.26	0	0.000217791	0.000216079	0	0	1.54369e-06	1.72869e-06	0	1.34921e-07	0	1.98876e-06	0	5.18198e-06	0.000258133	0.000345792	0.000204397	6.98761e-05	2.20747e-05	6.35146e-05	2.58194e-05	6.42747e-06	4.08455e-07	1.17548e-06	2.88622e-06	3.16558e-07	2.18053e-06	6.77255e-05	4.61314e-05	6.81598e-06	0	1.28169e-06	2.73352e-06	1.3536e-05	50817.7
		Phosphatidylinositide phosphatase SAC1 OS=Homo sapiens GN=SACM1L PE=1 SV=2	SACM1L	4	115.14	0	2.61014e-06	0	0	0	0	4.71578e-06	5.07343e-05	3.88967e-05	0	3.17054e-06	5.12506e-05	3.91008e-05	4.35213e-06	3.24727e-06	3.67177e-06	1.42357e-05	0	6.79028e-06	1.50788e-05	3.24527e-06	0	3.22564e-05	1.10155e-06	5.45704e-05	0	1.16835e-05	1.39341e-05	1.03921e-06	5.43193e-07	1.49274e-05	5.7061e-06	1.85778e-05	66969.3
		Hepatoma-derived growth factor OS=Homo sapiens GN=HDGF PE=1 SV=1	HDGF	3	115.12	0	0	7.9214e-06	0	0	0	0	8.23041e-06	1.04034e-06	0	0.000107771	1.00975e-05	4.9504e-06	7.78959e-05	0.000170092	0.000131762	5.43802e-05	3.81003e-06	4.95092e-06	0	4.75742e-06	0	1.3245e-05	1.51663e-05	1.8139e-05	2.95729e-07	6.71431e-07	0	0	0	2.43372e-06	0	5.7067e-05	26787.1
		SRA stem-loop-interacting RNA-binding protein, mitochondrial OS=Homo sapiens GN=SLIRP PE=1 SV=1	SLIRP	2	115.11	0	0	0	5.53868e-05	0	0	0	1.33417e-06	0	0	0	0	0	9.96977e-06	6.76e-05	3.28466e-05	1.60767e-05	4.37085e-06	0	0	3.63397e-06	0	0	4.48737e-06	0	9.92479e-07	6.69401e-05	1.05276e-05	7.88822e-06	0	0	6.94552e-06	1.33764e-05	12347.5
Matrisome-associated	ECM-affiliated Proteins	Tetranectin OS=Homo sapiens GN=CLEC3B PE=1 SV=3	CLEC3B	2	114.87	0	0	9.32097e-07	8.07859e-06	0	0	0	0	6.64234e-08	9.69081e-06	0	8.32186e-06	1.47089e-07	3.97381e-05	8.80339e-06	1.48768e-05	1.98897e-06	2.52838e-07	2.18457e-05	2.22343e-05	5.23357e-06	0	7.99862e-06	3.04079e-05	3.6681e-06	0	0	5.96609e-06	3.14077e-05	0	0	3.19286e-05	8.02392e-05	22535.8
		Transforming protein RhoA OS=Homo sapiens GN=RHOA PE=1 SV=1	RHOA	2	114.06	0	3.15908e-08	5.18655e-08	0	0	2.9145e-06	0	0	0	0	0	2.70368e-06	0	7.05895e-08	2.81092e-06	3.03546e-06	1.77287e-06	2.86335e-08	0	0	0	3.70553e-05	0	0	7.35116e-06	0	0	2.28686e-08	0	8.22619e-08	0	0	0	21767.5
		Heterogeneous nuclear ribonucleoprotein A0 OS=Homo sapiens GN=HNRNPA0 PE=1 SV=1	HNRNPA0	2	113.96	0	1.62562e-07	0	0	0	0	0	0	0	0	0	0	0	2.58238e-05	5.57389e-05	1.88361e-05	1.95502e-05	0	0	0	1.46428e-06	0	0	0	0	1.30907e-06	2.11147e-06	2.17451e-05	1.49147e-06	3.57222e-07	3.85359e-07	0	0	30839.7
		Ras-related protein Rab-8B OS=Homo sapiens GN=RAB8B PE=1 SV=2	RAB8B	1	113.89	0	0	0	1.38395e-05	0	0	0	0	0	0	0	0	0	0	0	3.31624e-07	3.43011e-07	0	0	0	0	0	0	0	3.21534e-07	0	0	0	0	0	0	0	0	23584.3
		U4/U6.U5 tri-snRNP-associated protein 2 OS=Homo sapiens GN=USP39 PE=1 SV=2	USP39	4	113.19	0	6.00199e-07	4.35736e-06	0	0	0	1.20725e-06	0	3.35584e-07	7.73009e-06	3.56206e-07	0	0	8.64976e-06	6.1571e-05	2.33997e-05	7.92892e-05	1.43346e-05	5.05228e-06	2.49966e-06	1.07986e-05	0	1.93981e-06	1.23045e-06	6.43478e-07	0	2.03013e-05	2.58909e-05	2.24625e-05	0	0	1.39606e-05	2.18381e-06	65382.8
		LIM and SH3 domain protein 1 OS=Homo sapiens GN=LASP1 PE=1 SV=2	LASP1	4	113.11	6.31635e-06	9.05344e-05	6.35654e-05	0	0	1.01551e-05	0	2.89431e-06	7.42249e-06	0	0	2.46141e-05	0	0.000103082	0.000141194	2.05301e-05	0.000414012	5.41027e-05	0.000115893	0.000117968	8.64383e-05	0	0.000106638	1.74175e-06	8.3343e-07	6.69921e-05	7.20902e-05	6.37798e-05	0.000130113	5.15851e-06	3.06572e-06	0.000238456	0.000210337	29715.9
		RNA-binding protein Raly OS=Homo sapiens GN=RALY PE=1 SV=1	RALY	4	112.94	0	0	3.30483e-06	0	0	0	0	0	2.13439e-06	0	0	0	0	4.79334e-05	0.000163179	6.95308e-05	6.23136e-05	1.20907e-05	0	0	0	0	0	0	1.83401e-06	3.61509e-06	1.82661e-05	2.71213e-05	3.25549e-05	0	0	3.20252e-05	1.07541e-05	32463.2
		60S ribosomal protein L19 OS=Homo sapiens GN=RPL19 PE=1 SV=1	RPL19	2	112.86	0	2.34784e-06	0.000231102	0	0	2.24026e-06	0	0	1.11089e-06	0	0	1.76132e-05	0	0.00024967	0.000240698	0.000145257	0.000132943	9.2718e-05	1.40881e-05	5.84412e-05	3.90014e-05	0	4.11591e-05	0	3.5061e-06	3.33365e-05	0.000164241	0.000116887	0.000149301	8.57764e-06	3.2448e-05	0.000105801	6.0538e-05	23465.9
		ATP-dependent RNA helicase DDX1 OS=Homo sapiens GN=DDX1 PE=1 SV=2	DDX1	5	112.84	0	1.45234e-07	3.90616e-06	4.24041e-06	0	4.91797e-07	1.6552e-06	0	1.03787e-05	0	2.56013e-06	7.9594e-07	1.07913e-07	3.02181e-05	4.98184e-05	5.94107e-05	9.64192e-05	0	6.55279e-06	1.09094e-05	3.43782e-06	0	5.62547e-06	0.00050632	0	5.67344e-06	1.81572e-05	3.09554e-05	3.71651e-05	8.59892e-07	9.06371e-07	1.49984e-05	1.78886e-05	82434.5
		Complement component C9 OS=Homo sapiens GN=C9 PE=1 SV=2	C9	5	112.63	0	6.43282e-05	0.000129977	0	0	1.37826e-05	3.11905e-05	4.90578e-06	8.23317e-06	0.00940526	2.88355e-05	1.35098e-06	3.66276e-07	0.000116908	4.16066e-05	0.000160499	4.06127e-05	0.000122931	5.77867e-05	0.000235772	0.000129879	0	1.04664e-06	4.57494e-05	2.06982e-05	1.84444e-05	5.20094e-05	0.000180475	5.89234e-05	4.47318e-06	6.94127e-07	0.000161474	5.84337e-05	63174.7
Core matrisome	Proteoglycans	Fibromodulin OS=Homo sapiens GN=FMOD PE=1 SV=2	FMOD	4	112.2	0	8.88425e-05	0.00010939	2.63851e-06	0	0.000144639	7.01095e-05	0.000428042	3.32876e-05	0.000993675	3.73886e-06	0.000179924	0.000124934	0.000417405	6.86525e-05	0.000105815	7.11013e-05	7.41377e-05	6.52888e-05	9.63627e-05	0.000198857	0	0.000140609	0.00102861	0.000147888	0.000335609	0.000104824	0.000237414	0.000145443	0.000737067	6.92074e-05	0.000203468	0.000529177	43179.7
		4F2 cell-surface antigen heavy chain OS=Homo sapiens GN=SLC3A2 PE=1 SV=3	SLC3A2	4	112.1	0	0	4.52873e-06	2.00794e-05	0	0	0	2.61045e-05	1.42286e-06	0	1.04845e-06	5.87368e-07	1.12978e-06	8.0203e-06	1.59384e-05	1.0053e-05	4.67069e-05	8.14639e-06	2.8491e-07	6.43868e-07	7.7288e-06	0	2.3373e-05	9.76751e-05	1.98225e-06	7.05518e-06	1.47431e-05	1.56693e-05	1.92738e-06	0	5.75353e-06	8.90257e-06	4.19021e-07	67996.7
		Phosphatidylinositol-binding clathrin assembly protein OS=Homo sapiens GN=PICALM PE=1 SV=2	PICALM	2	111.81	0	1.18725e-05	9.6106e-06	0	0	1.11577e-05	2.98812e-07	0	0	0	0	0	0	4.61951e-05	2.36154e-05	3.26887e-05	5.06957e-05	3.49407e-05	0	1.90327e-05	2.48283e-06	0	1.65187e-05	1.12235e-05	0	1.26256e-07	3.5667e-05	3.45513e-05	2.94227e-05	0	0	1.59606e-05	1.09428e-06	70757
		ATP synthase subunit delta, mitochondrial OS=Homo sapiens GN=ATP5D PE=1 SV=2	ATP5D	2	111.8	0	1.01589e-05	0.000109139	5.62587e-06	7.62247e-06	9.01553e-05	0.000238598	0.000226144	0.000227606	0	0.000134985	0.000286435	0.00026186	0.000193661	0.00053629	0.000140977	9.77946e-05	0.000115901	9.9295e-05	0.00012254	0.00014416	0	0.000224142	4.19423e-05	0.000237067	2.60355e-05	5.5522e-05	0.000144465	0.000118715	5.61046e-05	0.000128053	2.33873e-05	0.000558784	17488.9
		Myosin light chain kinase, smooth muscle OS=Homo sapiens GN=MYLK PE=1 SV=4	MYLK	5	111.67	0	8.02512e-06	8.97302e-05	0	0	3.91158e-05	7.67819e-05	7.72135e-05	5.66683e-05	8.36848e-06	0	0	2.29439e-05	4.47503e-05	1.34993e-05	2.36731e-05	3.25907e-05	1.99819e-05	1.58105e-05	3.81739e-05	5.27807e-05	0	1.49703e-06	3.44511e-05	4.99728e-06	2.80862e-05	1.52395e-05	1.38375e-05	3.15508e-05	9.09646e-07	0.000119282	3.18796e-05	2.32988e-06	210721
		Tubulin beta-1 chain OS=Homo sapiens GN=TUBB1 PE=1 SV=1	TUBB1	2	111.53	0	0	0	2.88849e-06	0	0	0	0	0	3.49071e-06	3.83785e-06	0	0	0	2.06574e-07	0	0.000140832	0	0	0	0	0	2.63292e-07	0	4.31646e-07	4.92573e-07	0	0	1.16139e-07	0	2.02667e-07	0	0	50327.1
		E3 ubiquitin-protein ligase DTX3L OS=Homo sapiens GN=DTX3L PE=1 SV=1	DTX3L	3	111.42	0	3.17637e-07	0	0	0	0	0	0	0	0	8.18661e-08	0	0	7.38477e-07	2.41502e-05	5.04798e-07	4.27872e-05	0	0	8.71125e-07	0	5.48076e-07	0	0	0	2.80669e-06	4.57696e-06	1.12411e-06	2.66785e-06	0	0	0	2.36827e-07	83556.9
		Acylglycerol kinase, mitochondrial OS=Homo sapiens GN=AGK PE=1 SV=2	AGK	3	111.11	0	1.19101e-07	9.97266e-07	0	0	1.39069e-07	2.2368e-06	2.58413e-05	0	0.000393372	2.4666e-07	0	3.82642e-06	6.36792e-06	0.000101935	2.73554e-05	5.3075e-05	1.01875e-05	1.12161e-06	1.68885e-06	2.42786e-06	1.55818e-06	8.74998e-07	6.88632e-07	0	5.22062e-06	1.34874e-05	5.31816e-06	3.3152e-06	3.13513e-07	8.72573e-07	3.60019e-07	7.92066e-07	47137.8
		Keratin, type I cytoskeletal 24 OS=Homo sapiens GN=KRT24 PE=1 SV=1	KRT24	1	110.93	0	6.00609e-05	6.6997e-05	0	0	6.65554e-05	8.95717e-05	5.85532e-05	6.53322e-05	0	0.000692636	8.02857e-05	6.3422e-05	0	2.2847e-05	3.36157e-05	9.45212e-06	0	4.74355e-05	0	5.33254e-05	1.3276e-05	4.44818e-05	1.91265e-05	0.000152253	1.41664e-05	0	0	3.01892e-05	4.95468e-05	7.84888e-05	2.07198e-05	2.15426e-05	55088.1
		AP-1 complex subunit beta-1 OS=Homo sapiens GN=AP1B1 PE=1 SV=2	AP1B1	3	110.44	0	0	4.9725e-06	1.07922e-05	0	5.04281e-06	2.56022e-05	1.11011e-06	8.86166e-06	0	0	2.24381e-05	0	1.44031e-05	6.39767e-05	5.94588e-05	6.03579e-05	1.3843e-05	4.61638e-07	1.01452e-05	0	0	1.2235e-05	4.12535e-06	0	4.54747e-06	2.80627e-05	2.58949e-05	1.41969e-05	4.29308e-06	1.01666e-05	1.32285e-05	2.33063e-05	104642
		Ubiquitin-40S ribosomal protein S27a OS=Homo sapiens GN=RPS27A PE=1 SV=2	RPS27A	1	110.32	0	0	1.20805e-07	0	0	0	0	0	0	0	0	0	0	0	7.64166e-05	4.87587e-05	4.62893e-05	0	0	0	0	0	0	0	0	0	0	0	0	0	0	0	0	17964.2
		Vacuolar protein sorting-associated protein 35 OS=Homo sapiens GN=VPS35 PE=1 SV=2	VPS35	6	110.3	0	2.57866e-05	4.50296e-05	1.78779e-05	0	4.00778e-05	0.000111138	3.02294e-05	6.37778e-05	0	0	5.46494e-05	3.22434e-05	8.14614e-05	9.60542e-05	9.73304e-05	5.74683e-05	9.40432e-05	1.89206e-05	2.78365e-05	4.28702e-05	0	5.67628e-05	1.35592e-06	2.90645e-06	2.02734e-05	7.52528e-05	8.20378e-05	6.34214e-05	2.00207e-05	1.82596e-05	6.51508e-05	1.53738e-05	91711.2
		Acyl carrier protein, mitochondrial OS=Homo sapiens GN=NDUFAB1 PE=1 SV=3	NDUFAB1	2	110.22	1.28242e-05	7.72642e-07	8.91715e-07	0.000133344	0	8.3418e-05	0.000108999	0	8.24097e-06	0	1.0821e-06	2.53856e-06	1.25734e-05	7.84541e-05	0.000157985	4.98575e-05	4.09279e-05	1.74823e-06	0	3.42713e-06	2.26847e-06	0.000429632	4.34307e-06	0	2.86877e-05	0.000168539	3.54322e-05	1.54116e-05	1.52485e-05	6.74017e-06	3.46523e-06	2.91184e-06	7.20515e-06	17416.7
		Cytosol aminopeptidase OS=Homo sapiens GN=LAP3 PE=1 SV=3	LAP3	5	110.17	0	3.83093e-07	2.3917e-05	0.00377881	0	0	8.49001e-06	1.25226e-05	0	0	0	1.77377e-06	0	5.35487e-05	3.03953e-05	4.43302e-05	4.22876e-05	0	4.33121e-06	0	0.000129283	0	4.02208e-06	0	2.55187e-06	0	1.3677e-05	7.74801e-06	8.02155e-06	4.47608e-07	6.48333e-07	4.17983e-06	1.0627e-07	56168
		Ig kappa chain V-I region Scw OS=Homo sapiens PE=1 SV=1	Ig kappa chain V-I region Scw OS=Homo sapiens PE=1 SV=1	2	109.98	1.89722e-05	0	0.0001043	0.000183318	0	9.10669e-07	0	3.5381e-07	0	0	0	0	0	6.96686e-05	0.000129312	4.07788e-05	3.30576e-05	9.84856e-05	8.46958e-05	0.000155106	5.1065e-05	0	0.000117096	1.43611e-06	0	1.56417e-05	0.000148883	2.92061e-05	9.29906e-05	7.29977e-07	3.21026e-05	0.000158984	0.000100024	11762.6
		Alpha-centractin OS=Homo sapiens GN=ACTR1A PE=1 SV=1	ACTR1A	2	109.8	0	1.29416e-06	0	0	0	0	0	0	0	1.34175e-05	0	4.67723e-06	0	3.21397e-05	2.04961e-05	4.52507e-05	3.70656e-05	2.28928e-06	0	1.72507e-06	5.09653e-07	0	0	0	0	0	3.18727e-05	2.10232e-05	1.03412e-05	4.05533e-07	0	0	5.21078e-06	42614.9
		Ras-related protein Rap-1b OS=Homo sapiens GN=RAP1B PE=1 SV=1	RAP1B	1	109.6	0	0	0	0	0	0	0	0	0	0	0	0	0	0	0	0	1.14944e-05	0	0	0	0	0	0	5.40579e-06	0	2.90473e-07	7.035e-06	4.21345e-06	0	0	0	0	0	20824
		Eukaryotic translation initiation factor 6 OS=Homo sapiens GN=EIF6 PE=1 SV=1	EIF6	4	109.58	0	2.1229e-06	8.3026e-06	0	0	0	0	0	0	0	0	0	0	3.58109e-05	0.000127657	4.87654e-05	7.28167e-05	1.93502e-05	3.58423e-05	2.08493e-05	3.63471e-05	2.52626e-07	9.54802e-06	0	0	0	4.7479e-05	3.08986e-05	3.32306e-05	0	0	1.31086e-05	4.29421e-06	26598.1
		Ras-related protein Rap-1b-like protein OS=Homo sapiens PE=2 SV=1	Ras-related protein Rap-1b-like protein OS=Homo sapiens PE=2 SV=1	3	109.53	9.22846e-05	8.07126e-05	0.00013601	0	0	1.54164e-05	4.97562e-05	9.78839e-05	1.65675e-05	3.84811e-05	2.67551e-06	0.00026443	0.000213008	0.000149483	0.00014679	0.000128161	0.000163386	0.0001363	6.61212e-05	0.00013095	0.00016274	0	0.000277243	1.91298e-07	8.62607e-06	8.618e-05	0.000150639	0.000132221	0.000146485	0.000131177	0.000114886	0.000198469	0.00010852	20924.1
		PDZ and LIM domain protein 4 OS=Homo sapiens GN=PDLIM4 PE=1 SV=2	PDLIM4	3	109.52	0	0	0	0	0	0	0	0	0	0	0	3.17677e-06	2.50881e-06	1.9474e-05	1.14297e-05	2.33774e-06	4.35905e-05	0	0	0	0	2.77445e-07	0	0	6.68404e-06	0	4.88972e-07	1.14822e-06	5.00064e-07	0	0	0	9.86188e-07	35397.3
		40S ribosomal protein S20 OS=Homo sapiens GN=RPS20 PE=1 SV=1	RPS20	5	109.46	0	1.42182e-05	6.133e-05	0	4.68037e-05	0.000191549	0.000106438	0.000165135	0.000236277	1.51817e-05	3.7981e-05	3.72973e-06	5.18093e-05	0.000369468	0.00046764	0.00043699	0.000249915	0.000281026	9.89422e-05	0.000143631	6.50901e-05	0	0.00011509	3.42072e-07	0.000106404	0.000175545	0.000483884	0.000479638	0.000472176	5.73238e-05	0.000165692	0.000291561	0.000144586	13371.6
		Serine/arginine repetitive matrix protein 1 OS=Homo sapiens GN=SRRM1 PE=1 SV=2	SRRM1	2	109.452	0	0	0	0	0	0	0	0	2.18354e-07	0	0	0	0	2.08528e-05	4.0685e-05	9.61421e-06	1.42534e-07	0	0	0	0	0	0	0	0	0	0	0	0	0	0	1.58812e-08	0	102338
		Integrin-linked protein kinase OS=Homo sapiens GN=ILK PE=1 SV=2	ILK	6	109.13	0	7.36025e-05	0.000123275	0	0	1.71448e-05	0.000169531	1.47684e-06	0.000208405	0	2.54857e-06	0.000137805	4.57845e-05	7.60666e-05	6.1956e-05	6.29085e-05	5.40537e-05	4.88416e-05	2.68442e-05	3.50266e-05	7.49878e-05	1.09582e-05	0.000229342	4.7423e-05	0.00013113	1.64247e-05	7.72668e-05	0.000100973	9.97344e-05	2.42131e-06	2.5702e-05	0.000160472	0.00026394	51419.8
		Exportin-2 OS=Homo sapiens GN=CSE1L PE=1 SV=3	CSE1L	2	109.12	0	1.07046e-07	0.00758235	0	0	2.76254e-07	4.74678e-06	0.0351119	0.0287506	0	0.0270819	5.90435e-07	0.0268369	0.00841174	0.016485	0.0141473	0.0254032	0.0226225	0.0236782	0.0113038	0.0269343	1.0373e-06	0.0213769	0	6.16305e-07	0.016079	0.00379239	0.00277489	0.034659	0	0.0273596	0.0390326	0.0256621	110423
		Glycine dehydrogenase [decarboxylating], mitochondrial OS=Homo sapiens GN=GLDC PE=1 SV=2	GLDC	2	108.79	0	0	0	0	0	0	6.23725e-07	5.47547e-07	5.64529e-07	0	2.29341e-07	0	0	7.38618e-07	2.3572e-06	6.64174e-06	2.13234e-05	0	0	0	0	0	1.63343e-07	0	0	0	2.6705e-07	1.44209e-07	0	0	0	0	1.17069e-07	112733
		Glutathione S-transferase omega-1 OS=Homo sapiens GN=GSTO1 PE=1 SV=2	GSTO1	3	108.59	0	0	2.48002e-05	0	0	0	0	1.02529e-06	0	0	2.06901e-06	0	1.06345e-06	6.60955e-05	6.27472e-06	4.86284e-05	1.48093e-06	0	0	0	0	0	2.78439e-07	0	0	1.1234e-06	0	0	3.05705e-07	4.4391e-06	0	0	1.33044e-06	27565.9
		RNA-binding motif protein, X chromosome OS=Homo sapiens GN=RBMX PE=1 SV=3	RBMX	3	108.53	0	1.45826e-06	1.11882e-06	0	0.000157663	0	5.3885e-06	0	9.37523e-06	0	0	0	0	4.48851e-05	0.000129557	5.0579e-05	4.44117e-05	0	0	4.94249e-05	0	0	8.87684e-08	0	0	2.82531e-06	3.29185e-07	2.41678e-06	5.62538e-06	1.11381e-07	0	4.33206e-06	1.06755e-05	42332.4
		Putative tubulin-like protein alpha-4B OS=Homo sapiens GN=TUBA4B PE=5 SV=2	TUBA4B	5	108.46	0	5.83883e-05	0.000167188	0	0	0.000582746	0.00099159	0.000515743	0.00145294	0.000530657	1.79133e-06	0.000762763	0.000263972	0.00132753	0.00116698	0.00137356	0.00147671	0.000264503	0.000145339	0.00013569	0.000173926	0	0.000130362	0.000404054	0.0005834	0.000415439	0.000671394	0.000460698	0.00039996	0.000211297	8.01983e-05	0.000310739	0.000333539	27550.6
		Ras-related protein Rab-5B OS=Homo sapiens GN=RAB5B PE=1 SV=1	RAB5B	2	108.16	0	2.38244e-07	9.12243e-06	3.15223e-06	0	1.26315e-06	5.0046e-06	1.49173e-06	3.12294e-06	0	0	0	0	2.78241e-05	2.88468e-05	1.63565e-05	3.66219e-05	4.39608e-06	1.87226e-06	1.41175e-06	1.44163e-06	0	0	0	0	0	1.63779e-05	1.39486e-05	1.04718e-05	0	0	0	4.40314e-06	23705.9
		Thyroid hormone receptor-associated protein 3 OS=Homo sapiens GN=THRAP3 PE=1 SV=2	THRAP3	4	108.14	0	3.77279e-06	8.28609e-07	0	6.40496e-06	0	0	0	0	0	0	0	3.68278e-07	7.41539e-06	3.1548e-05	7.37574e-06	1.44597e-06	9.96142e-06	4.1227e-08	0	9.90579e-07	1.67979e-07	1.6329e-06	0	1.17398e-06	3.37685e-05	2.11044e-07	1.53259e-07	0	0	6.28288e-07	0	0	108668
Matrisome-associated	ECM-affiliated Proteins	Complement C1q subcomponent subunit C OS=Homo sapiens GN=C1QC PE=1 SV=3	C1QC	3	108.12	1.4593e-06	7.06391e-06	6.41291e-05	0	0	0.000111681	0.000375606	9.04342e-05	0.000118231	0	0	9.55503e-05	2.15708e-05	8.49806e-05	5.22298e-05	0.000210421	0.000160474	0.000258107	0.000149991	0.000242899	8.78565e-05	1.05664e-05	0.000163977	0.000252474	0.000102767	0.000167255	6.58158e-05	3.35328e-05	5.47353e-05	4.38284e-05	0.000125906	0.000143775	0.000250244	25773.2
		Dynein light chain 1, cytoplasmic OS=Homo sapiens GN=DYNLL1 PE=1 SV=1	DYNLL1	3	108.09	0	0	9.1265e-05	0	0	0	0	0	1.02909e-07	0	0	0	5.40313e-07	0.000114981	0.000161173	8.30316e-05	3.02422e-05	4.19651e-06	3.87477e-05	5.10499e-05	0.000114628	0	0.000110301	0	0	2.83906e-06	0	7.5125e-05	8.34735e-05	0	0	7.17381e-05	9.48373e-05	10364.4
		Nuclease-sensitive element-binding protein 1 OS=Homo sapiens GN=YBX1 PE=1 SV=3	YBX1	3	107.98	0	0	4.19208e-06	6.00999e-06	8.11517e-06	0	0	0	0	0	0	0	0	2.74012e-05	2.96828e-05	2.74397e-05	1.8177e-07	0	0	0	0	6.28645e-07	1.08112e-07	0	1.06057e-06	2.64512e-07	1.32425e-08	0	0	8.14282e-08	2.25448e-06	3.72421e-08	0	35923
		Guanine nucleotide-binding protein G(I)/G(S)/G(O) subunit gamma-12 OS=Homo sapiens GN=GNG12 PE=1 SV=3	GNG12	4	107.93	0	0.00264509	0.000785689	0	0	0.000111384	0.000564544	5.54984e-05	0.000173948	1.26592e-06	0.000625712	0.00057659	0.000127195	0.000281899	4.66486e-05	0.000144239	6.39747e-05	0.00018284	0.000320377	0.000128195	0.000570591	0	0.000707706	0.000186377	9.79378e-05	0.000533397	0.000170776	0.000184027	0.000373756	0.000736542	0.000354488	0.000357563	0.000169887	8004.78
		Transmembrane emp24 domain-containing protein 2 OS=Homo sapiens GN=TMED2 PE=1 SV=1	TMED2	3	107.9	0	4.37573e-06	1.10469e-05	0	0	5.38437e-05	4.00135e-05	0	6.06466e-05	0	0	1.02571e-05	0	0.000106817	0.000131134	0.000127552	0.000167028	1.91578e-05	1.57839e-05	1.15642e-05	4.54342e-05	0	2.41005e-05	7.69026e-05	4.79126e-06	5.67008e-06	5.51326e-05	5.89124e-05	6.00512e-05	0	1.36024e-05	1.58151e-05	1.19488e-05	22760.6
		Fermitin family homolog 3 OS=Homo sapiens GN=FERMT3 PE=1 SV=1	FERMT3	4	107.88	0	1.17281e-06	1.72416e-05	0	0	8.94958e-07	0	2.14052e-06	0	0	0	0	2.40618e-07	1.64466e-05	5.07396e-05	4.53542e-05	7.66906e-05	5.13176e-05	0	8.9294e-06	4.25221e-06	0	5.58804e-06	0	0	3.84196e-07	4.1766e-05	2.65343e-05	5.82843e-05	0	0	6.25218e-05	8.57395e-06	75955.5
		Flavin reductase (NADPH) OS=Homo sapiens GN=BLVRB PE=1 SV=3	BLVRB	3	107.79	0	2.08928e-06	5.48886e-05	0	0	0	4.66813e-07	0	0	0	0	3.58571e-07	0	4.83687e-05	9.66882e-05	0.000131431	5.47095e-07	8.40408e-07	1.20463e-06	0	0	0	0	0	0	0	4.17204e-06	1.01484e-05	1.31138e-06	0	0	0	0	22118.3
		40S ribosomal protein S4, Y isoform 1 OS=Homo sapiens GN=RPS4Y1 PE=2 SV=2	RPS4Y1	5	107.77	9.32688e-07	0	1.98093e-05	4.10888e-06	2.11863e-05	0.000111743	8.47316e-05	5.54441e-05	8.77541e-05	1.24059e-06	9.83076e-05	4.71349e-05	3.1124e-05	0.00021242	0.000351706	0.000293545	0.000164551	7.24256e-05	1.51674e-05	6.07551e-05	4.41625e-05	5.47501e-08	2.16488e-05	0	8.89938e-05	6.21406e-05	2.57898e-05	6.51219e-05	5.19156e-05	4.87259e-05	3.00254e-05	4.17268e-05	8.67304e-05	29455.8
		Ras-related protein Rab-7a OS=Homo sapiens GN=RAB7A PE=1 SV=1	RAB7A	5	107.59	0	1.94893e-05	4.83711e-05	2.78666e-06	0	1.91811e-05	4.41748e-05	1.28535e-05	3.67062e-05	0	2.97813e-05	5.14582e-05	1.32718e-05	0.000134275	0.000108527	0.000148069	8.90459e-05	0.000104453	2.93568e-05	1.63769e-05	5.57518e-05	0	0.000136185	0	2.81973e-05	6.35276e-05	7.17398e-05	6.27639e-05	8.32219e-05	8.58467e-05	8.09442e-05	0.000124914	2.9123e-05	23489.1
Core matrisome	ECM Glycoproteins	Target of Nesh-SH3 OS=Homo sapiens GN=ABI3BP PE=1 SV=1	ABI3BP	3	107.48	1.02297e-05	0.000104704	0.000150341	0.000396695	0	8.06613e-05	0.00011619	0.000186774	0.000129425	2.76368e-05	6.98711e-05	0.000146842	0.000242465	5.46673e-06	1.02371e-05	3.28278e-06	5.48918e-06	2.71268e-05	0.000111965	9.29353e-05	0.000116582	2.16015e-06	0.000118297	0.000216016	0.000225148	0.000231154	3.42592e-05	3.26828e-05	4.29111e-05	0.000198577	7.42489e-05	5.78035e-05	2.61221e-05	118646
		Cleavage and polyadenylation specificity factor subunit 5 OS=Homo sapiens GN=NUDT21 PE=1 SV=1	NUDT21	2	107.42	9.52298e-07	8.59623e-07	7.22576e-06	0	0	0	8.83744e-07	0	1.28645e-06	0	5.14994e-06	0	8.31822e-07	2.05553e-05	5.49214e-05	1.58212e-05	2.97421e-05	6.2635e-06	0	3.59859e-06	3.88264e-06	0	2.64318e-06	0.000287627	2.61111e-06	0	4.02323e-06	3.07403e-05	1.42908e-05	0	0	4.97563e-06	2.36158e-05	26227.1
		Catenin alpha-2 OS=Homo sapiens GN=CTNNA2 PE=1 SV=5	CTNNA2	5	107.36	0	4.87885e-06	1.09374e-05	1.0965e-05	0	8.50816e-06	3.09099e-05	2.92195e-07	9.25311e-05	0	1.82723e-06	7.28677e-06	1.27112e-06	5.70371e-05	0.000178101	4.44485e-05	7.40855e-05	1.98641e-05	0	5.61881e-06	8.34962e-06	0	3.75434e-05	7.50707e-05	1.07613e-06	2.60742e-05	3.97343e-05	6.52041e-05	1.38231e-05	2.25545e-06	1.0744e-06	9.80774e-06	1.84272e-05	105317
		Polyribonucleotide nucleotidyltransferase 1, mitochondrial OS=Homo sapiens GN=PNPT1 PE=1 SV=2	PNPT1	2	107.21	0	0	0	0	0	0	0	0	0	0	0	0	0	1.82607e-07	1.74263e-05	4.6195e-06	1.48847e-05	0	0	0	0	0	0	0	0	1.02582e-07	0	8.28285e-07	6.9966e-07	0	0	0	0	85954.3
		Polyadenylate-binding protein 1 OS=Homo sapiens GN=PABPC1 PE=1 SV=2	PABPC1	1	107.01	0	0	7.5434e-06	0	0	0	3.61645e-07	6.44327e-06	0	0	0	2.84563e-05	0	2.05071e-05	2.45251e-05	2.56306e-05	2.91053e-05	1.6278e-05	0	2.62261e-06	0	0	7.57541e-06	3.01822e-06	0	8.94955e-06	1.09062e-05	1.70966e-05	1.79588e-05	1.23726e-05	1.22964e-05	1.24827e-05	1.62815e-05	70672.4
		Importin subunit beta-1 OS=Homo sapiens GN=KPNB1 PE=1 SV=2	KPNB1	3	106.92	0	4.54773e-06	1.14972e-05	0.000144458	0	1.08725e-05	0	1.13414e-07	2.3291e-07	0	7.11621e-07	0	1.28343e-06	5.89394e-05	4.62739e-05	4.03001e-05	5.85892e-05	3.84439e-06	6.32649e-06	0	5.6717e-06	0	2.15985e-05	3.25007e-06	2.26795e-07	7.35488e-07	3.6833e-05	2.74411e-05	2.60008e-05	2.76474e-05	0	3.66852e-05	4.24593e-05	200056
		Signal recognition particle 9 kDa protein OS=Homo sapiens GN=SRP9 PE=1 SV=2	SRP9	3	106.91	0	3.25828e-07	1.36713e-06	0	0	2.10391e-05	2.78944e-05	2.78491e-05	3.67157e-05	8.06877e-06	2.25909e-05	0.000126471	2.82626e-05	0.000170952	0.000338601	0.000124315	0.000254723	5.19489e-05	2.85716e-05	3.22718e-05	2.70696e-05	0	4.43189e-05	0	6.29812e-05	5.73083e-05	0.000102332	9.49558e-05	0.000116902	2.96332e-05	3.67268e-05	0.000117895	6.50469e-05	10110.2
		UPF0568 protein C14orf166 OS=Homo sapiens GN=C14orf166 PE=1 SV=1	C14orf166	4	106.6	1.35288e-06	3.06645e-06	9.32239e-07	0	0	8.21195e-07	8.67577e-07	2.79055e-07	0	0	0	0	4.85941e-05	5.96841e-05	7.34377e-05	4.31462e-05	5.73888e-05	2.9437e-05	6.80963e-06	1.46939e-05	2.14446e-05	0	6.50377e-06	0	0	0	2.84362e-05	2.2062e-05	4.07076e-05	0	0	3.23536e-05	1.72535e-05	28068.3
		Four and a half LIM domains protein 3 OS=Homo sapiens GN=FHL3 PE=1 SV=4	FHL3	3	106.26	0	0	0	0	0	0	0	0	0	0	0	7.62433e-07	0	0.000108074	3.20362e-06	3.63609e-05	8.37568e-06	0	0	5.16338e-07	0	2.34904e-06	0	0	0	1.53627e-07	2.08188e-06	6.18211e-06	2.53014e-06	0	0	1.09696e-06	1.42378e-05	31189.5
		Erlin-1 OS=Homo sapiens GN=ERLIN1 PE=1 SV=1	ERLIN1	3	106.09	0	6.11598e-06	1.20232e-05	1.49358e-05	0	0	1.03666e-06	7.37877e-05	8.45934e-07	5.98675e-06	3.31481e-06	6.07065e-05	0	4.77684e-05	8.0698e-05	3.22242e-05	4.49167e-05	2.98518e-05	2.49619e-05	7.18034e-06	4.05238e-05	1.73697e-05	3.9011e-05	0.000129995	0	0	2.93091e-05	4.21111e-05	3.89722e-05	6.49721e-05	2.37825e-05	3.44523e-05	8.83293e-06	38926.4
Matrisome-associated	Secreted Factors	Protein S100-A4 OS=Homo sapiens GN=S100A4 PE=1 SV=1	S100A4	3	106.04	1.33225e-06	0	4.33573e-05	0	6.82266e-06	0.000393652	0.000202646	7.40586e-05	0.000130376	2.32839e-06	5.3367e-05	0.000178451	0.000173948	0.000528259	0.000144221	0.000291333	8.96153e-05	0.000323493	0.000110585	8.58964e-05	1.41944e-05	1.25698e-07	0.000109257	3.41257e-07	0.000131188	5.66309e-05	0.000121196	0.000323925	0.000193622	7.07639e-05	0.000175005	0.000131083	3.49182e-05	11727.3
		HLA class II histocompatibility antigen gamma chain OS=Homo sapiens GN=CD74 PE=1 SV=3	CD74	4	106.01	4.93598e-07	0.01168	0.00307686	0.000220861	0	3.41548e-05	1.45362e-05	3.09211e-05	7.88077e-06	1.00094e-05	0	3.33057e-06	0	0.00023837	0.000276694	0.000153631	0.000119962	3.38969e-05	0.000146723	3.99537e-05	3.7219e-05	0	0.000124081	4.96977e-05	7.02024e-07	2.54897e-05	4.88512e-05	5.31369e-05	0.000104756	7.84144e-06	1.21487e-05	8.50245e-05	1.86633e-05	33515
		Coiled-coil domain-containing protein 47 OS=Homo sapiens GN=CCDC47 PE=1 SV=1	CCDC47	2	105.94	0	0	0	0	0	0	0	4.81591e-07	7.1706e-06	0	0	0	0	1.33688e-05	2.80311e-05	9.3567e-06	4.52405e-05	0	0	0	0	1.18604e-06	0	0	0	0	7.15209e-07	0	8.55928e-07	0	0	0	0	55874.9
		Complement C1s subcomponent OS=Homo sapiens GN=C1S PE=1 SV=1	C1S	2	105.82	0	0	2.71904e-06	4.92748e-05	0	3.70431e-05	5.0015e-06	2.9394e-06	1.12623e-06	0	8.19979e-05	4.51029e-05	0	5.02066e-05	1.39544e-05	8.56529e-05	6.87515e-05	3.11877e-05	1.93803e-05	5.13307e-06	1.01225e-06	0	3.03776e-05	0	5.97477e-06	6.90542e-06	7.77127e-06	4.27998e-05	7.0242e-06	1.30502e-06	5.19548e-06	3.22933e-05	1.61779e-05	76685.5
		Histidine--tRNA ligase, cytoplasmic OS=Homo sapiens GN=HARS PE=1 SV=2	HARS	2	105.777	0	8.7409e-06	0.000166201	1.27556e-05	0	0.000409248	0.000175249	0.000407536	0.000426238	1.02256e-06	1.0951e-05	0.000505011	0.00138048	9.16739e-06	7.68572e-06	4.56701e-07	4.36918e-05	2.84529e-05	0.00016385	1.59503e-06	0.000170766	0	0.000717449	0.000406418	0.00109071	7.96056e-05	5.69948e-05	3.98985e-05	9.68245e-05	0.000235522	9.17815e-06	7.93507e-05	5.94282e-05	57413.1
		Aquaporin-1 OS=Homo sapiens GN=AQP1 PE=1 SV=3	AQP1	1	105.71	0	1.36617e-05	1.8006e-05	0	0	0.000300411	0.00101735	0	0	0	0.00126235	0	0	2.41477e-05	2.82873e-05	1.79416e-05	4.47234e-06	0	1.59066e-05	8.21512e-07	1.74604e-05	0	2.64614e-05	0	1.14599e-06	0	6.50078e-06	1.44374e-05	3.42522e-06	0	0	0	0	28526.4
		Keratin, type I cytoskeletal 25 OS=Homo sapiens GN=KRT25 PE=1 SV=1	KRT25	1	105.58	0.000400349	0	0	0.000163024	0	9.80155e-08	0	0	0	0.000666801	0	6.24014e-08	0	0	0	0	6.79427e-07	0	0	0	0	0	0	0	0	0	5.99517e-08	0	0	0	0	0	0	49318.4
		Isocitrate dehydrogenase [NAD] subunit beta, mitochondrial OS=Homo sapiens GN=IDH3B PE=1 SV=2	IDH3B	1	105.31	0	4.13639e-07	8.07579e-07	0	0	1.47694e-07	5.03574e-06	3.01876e-07	1.74878e-06	0	0	0	0	1.63305e-06	3.40828e-06	2.12796e-06	1.06108e-05	0	4.4126e-07	0	0	0	4.75107e-07	0	0	0	1.06108e-07	2.43472e-06	3.28308e-06	0	0	0	0	42183.9
		Putative heat shock protein HSP 90-alpha A2 OS=Homo sapiens GN=HSP90AA2 PE=1 SV=2	HSP90AA2	3	104.87	0	0.000129888	0.000575981	0	1.79705e-05	4.71377e-05	5.414e-05	0.000153745	0.000107093	2.2875e-05	7.12418e-05	0.000158923	0.000106788	0.000525482	0.00039726	0.000836854	0.000177924	0.000116314	0.000100101	6.81053e-05	0.000110582	1.6829e-05	0.000171262	1.45406e-05	8.44065e-05	0.00011501	0.000154916	0.000158568	0.000118946	0.000113568	0.000128764	0.000164562	0.000213289	39365.1
		Phosphate carrier protein, mitochondrial OS=Homo sapiens GN=SLC25A3 PE=1 SV=2	SLC25A3	6	104.82	0	1.92444e-05	0.000323711	3.78483e-05	0	0.000205894	0.00021934	0.000371305	0.00016789	8.31696e-06	0.000265778	0.000478863	0.000486908	0.000218116	0.000612907	0.000331128	0.000560233	7.12923e-05	8.32882e-05	7.45911e-05	0.000164405	0	0.000530502	3.36879e-05	0.000488554	7.27501e-05	0.000271226	0.000177884	0.000231018	0.000151032	5.48841e-05	0.000134484	0.000163304	40095.7
		Regulator of chromosome condensation OS=Homo sapiens GN=RCC1 PE=1 SV=1	RCC1	3	104.43	9.6004e-07	8.71579e-07	3.84006e-06	0	0	1.34299e-05	0	0	0	0	0	1.04532e-05	0	3.98099e-05	0.000174572	5.15105e-05	2.74343e-05	4.81249e-06	9.64639e-06	4.11612e-06	9.67233e-06	5.40621e-06	3.96634e-06	0	0	1.57096e-07	2.37731e-05	1.40354e-05	2.05367e-05	0	0	1.64881e-05	1.83578e-05	32562.4
Matrisome-associated	ECM Regulators	Procollagen-lysine,2-oxoglutarate 5-dioxygenase 3 OS=Homo sapiens GN=PLOD3 PE=1 SV=1	PLOD3	2	103.877	0	1.34806e-07	5.29548e-05	0	1.78929e-06	0	0	0	0	0	0	5.72639e-06	2.27917e-07	3.22389e-05	3.55078e-05	6.23314e-05	1.69917e-05	4.82727e-07	8.7571e-07	0	9.8888e-06	0	0	0	0	0	3.52795e-06	7.61711e-06	3.55503e-06	0	0	4.54765e-06	0	84788
		40S ribosomal protein S24 OS=Homo sapiens GN=RPS24 PE=1 SV=1	RPS24	4	103.66	0.000487665	1.27017e-05	4.81648e-06	0	0	2.98598e-06	3.67752e-06	7.08855e-07	2.37503e-06	0	0.000487212	6.08978e-06	0	0.00011862	0.000205766	0.000140901	0.00015425	1.55121e-05	1.14615e-06	7.0129e-06	1.30551e-05	3.20375e-07	2.19814e-05	0	1.36648e-05	1.76188e-06	7.36667e-05	5.33353e-05	2.21298e-05	0	1.02618e-06	1.69597e-05	8.15936e-06	15422.3
		Unconventional myosin-If OS=Homo sapiens GN=MYO1F PE=1 SV=3	MYO1F	1	103.57	0	0	3.28635e-07	0	0	9.66307e-07	0	0	0	0	0	0	0	1.10441e-05	9.2536e-06	1.20482e-05	2.0394e-05	1.18063e-05	2.73837e-07	1.41786e-06	1.44479e-06	0	5.14222e-07	6.992e-07	8.96268e-07	0	1.99445e-05	1.05418e-05	9.40253e-06	0	0	4.63191e-06	1.61534e-07	124850
		Keratin, type II cuticular Hb4 OS=Homo sapiens GN=KRT84 PE=1 SV=2	KRT84	2	103	0	0.00117567	0.00135391	0	1.79585e-05	1.34725e-05	0	1.59129e-05	0.000109806	0	0	0.000205343	3.09401e-05	0.00306562	0.00363956	0.00249025	7.71538e-05	0.000126685	0.000179224	0.000217394	0.000193472	2.27952e-05	0.000232369	0.0013064	3.76706e-07	1.00856e-05	0.000250479	0.00018171	0.000241025	3.02858e-05	8.34113e-05	0.000136377	0.000281187	64843.4
		Transmembrane protein 43 OS=Homo sapiens GN=TMEM43 PE=1 SV=1	TMEM43	6	102.66	0	4.45529e-06	2.20155e-05	5.18712e-06	0	8.82537e-07	2.72092e-06	7.34727e-05	5.80985e-06	0	8.90149e-07	6.23303e-05	4.75923e-06	0.000178233	0.000254007	0.000168248	0.000130432	5.86816e-05	6.84115e-05	2.67509e-05	8.03735e-05	0	0.000116836	4.90076e-06	2.4545e-07	6.5269e-06	0.00010449	7.53586e-05	0.00017384	7.19119e-05	4.51688e-05	0.000174703	5.9825e-05	44876.8
		HLA class I histocompatibility antigen, B-58 alpha chain OS=Homo sapiens GN=HLA-B PE=2 SV=1	HLA-B	1	102.64	0	0	6.37083e-05	0	0	1.47618e-05	0	2.02161e-05	0	0	4.43609e-06	0	0	7.88964e-05	0.000266004	0.000131946	0.000365958	0.000102058	0	1.63528e-05	0	0	4.37498e-05	0	0	2.6878e-05	0.000102888	6.81136e-05	7.42099e-05	0	3.13941e-05	0	3.4779e-05	40336.5
		Protein transport protein Sec61 subunit beta OS=Homo sapiens GN=SEC61B PE=1 SV=2	SEC61B	2	102.57	0	0	2.16741e-05	0	0	0	0	0	0	0	0	0	0	4.35554e-05	5.78927e-05	5.8669e-05	0	0	0	1.95583e-07	0	0	7.22379e-07	0	0	0	0	0	0	3.43068e-07	0	4.65695e-07	3.41705e-06	9972.9
		Serine/threonine-protein phosphatase PP1-alpha catalytic subunit OS=Homo sapiens GN=PPP1CA PE=1 SV=1	PPP1CA	1	102.54	0	0	0	0	0	0	2.40525e-07	1.36284e-05	6.71457e-06	0	6.32968e-07	0	0	7.69785e-06	1.08313e-05	8.28044e-06	9.29716e-06	0	0	0	0	0	0	0	0	0	2.37497e-06	0	1.11947e-06	0	0	0	0	37512.8
		Protein kinase C delta-binding protein OS=Homo sapiens GN=PRKCDBP PE=1 SV=3	PRKCDBP	7	102.4	0	2.42024e-06	7.31081e-05	0.000237392	0	4.05345e-05	0.000301119	1.96793e-05	0.00011466	0	7.57256e-05	0.000255241	0.000226487	5.48342e-05	2.91791e-05	2.43465e-05	4.34938e-06	1.06596e-05	0.000129808	2.54266e-05	0.000104502	0	7.01366e-05	2.65369e-05	0.000478344	9.69917e-05	1.67249e-05	3.41051e-05	1.64438e-05	8.59331e-05	2.56292e-05	1.24077e-05	2.8704e-06	27700.1
		40S ribosomal protein S15a OS=Homo sapiens GN=RPS15A PE=1 SV=2	RPS15A	6	102.21	0.000497608	2.31554e-05	0.000116702	0	0	0.00030323	0.000378967	0.000537308	0.000611634	0.00165347	0.000175892	0.000254485	0.000214338	0.000186866	0.000315631	0.00029926	0.000328123	0.00015263	9.14999e-05	0.000101244	8.39914e-05	2.36276e-05	0.00018155	8.37514e-05	0.000224592	0.000182808	0.000262731	0.000143912	0.000353599	0.000283925	0.000246393	0.000295576	0.000187699	14838.7
		N(G),N(G)-dimethylarginine dimethylaminohydrolase 2 OS=Homo sapiens GN=DDAH2 PE=1 SV=1	DDAH2	2	101.96	0	5.19148e-05	7.28194e-05	0	0	0	0	2.1437e-06	0	0	0	0	0	7.689e-05	3.04125e-05	4.405e-05	4.65973e-06	1.25704e-05	2.63204e-06	9.39098e-06	5.3046e-06	0	2.55366e-05	0	0	0	1.37296e-05	1.79596e-05	1.3395e-05	0	0	1.41918e-05	4.83691e-06	29643.7
		Keratin, type II cytoskeletal 3 OS=Homo sapiens GN=KRT3 PE=1 SV=3	KRT3	2	101.78	0	5.91311e-05	5.84939e-05	0	0	0	0	0	0	0	0	0	6.11316e-07	9.70771e-05	0.000344789	0.000205065	5.01574e-07	0	0	0	0	0	8.87624e-07	0	0	0	3.94109e-07	0	7.67569e-08	1.72939e-07	0	2.03643e-08	1.53426e-06	64418.8
		Cytochrome c oxidase subunit 4 isoform 1, mitochondrial OS=Homo sapiens GN=COX4I1 PE=1 SV=1	COX4I1	7	101.78	5.62858e-06	0	0.000250296	0	8.30503e-07	0.000189926	0.00053725	0.000573987	0.000847975	0	6.74035e-05	0.000143532	0.000516806	0.000164658	0.00070286	0.000218819	0.000482433	7.54461e-05	0.000152468	0.000181563	0.000258824	2.5975e-06	0.000580424	0.000428613	0.000105052	0.00012395	0.00015942	0.000135208	0.000410371	0.000439163	0.000337328	0.000232213	0.000288574	19575.8
		HLA class I histocompatibility antigen, Cw-3 alpha chain OS=Homo sapiens GN=HLA-C PE=1 SV=2	HLA-C	1	101.6	0.000284185	0	0	0	0	1.56784e-07	0.000198197	5.34042e-06	0.000171364	0	0	0	0	0	0	0	4.61837e-05	6.15023e-06	9.36857e-05	1.66998e-05	4.51782e-07	0	2.31623e-05	9.90479e-08	0	1.78693e-06	1.37471e-06	1.4659e-05	0	0	0	9.7232e-08	1.78015e-05	40860.1
		Histone H1x OS=Homo sapiens GN=H1FX PE=1 SV=1	H1FX	5	101.54	1.66219e-06	1.55797e-05	7.52617e-05	0	0	7.26175e-05	9.17222e-05	2.5154e-06	4.11764e-05	1.3957e-05	5.88046e-07	2.59811e-05	6.29909e-06	0.000107027	0.000344974	0.000135017	0.000128561	8.23036e-05	2.72748e-06	3.35403e-05	3.13406e-05	0	0.000106764	4.37539e-06	2.15437e-05	5.65788e-05	6.44528e-05	0.000132502	0.000121831	3.98461e-05	5.76064e-06	0.000271656	0.000105887	22486.7
		Putative RNA-binding protein Luc7-like 2 OS=Homo sapiens GN=LUC7L2 PE=1 SV=2	LUC7L2	2	101.4	0	0	0	0	0	3.75933e-06	0	7.57633e-07	3.54834e-07	0	5.34568e-07	3.46754e-07	2.60319e-06	9.98947e-06	4.6585e-05	4.47341e-06	1.53172e-05	5.84709e-07	0	0	0	0	0	0	9.02995e-07	8.11199e-07	1.9869e-06	1.81791e-06	1.88403e-06	0	0	0	0	46513.7
Matrisome-associated	ECM Regulators	Trypsin-1 OS=Homo sapiens GN=PRSS1 PE=1 SV=1	PRSS1	2	101.38	0	0.000401003	0.00106397	0	0	0.000608322	0.000330235	0.00912366	0.000363506	0	0	0.00777693	0.00825618	0.000746577	0.00190441	0.00244683	0.00386782	0.000440382	0.00657811	0.00540806	0.00513907	0.00144112	0.00360161	0.000904196	0.000428049	0.00518979	0.000349282	0.00104581	0.00579329	0.00591542	0.00631946	0.00445761	0.00253487	26557.3
		Heterogeneous nuclear ribonucleoprotein Q OS=Homo sapiens GN=SYNCRIP PE=1 SV=2	SYNCRIP	7	101.34	4.08086e-05	2.73299e-06	2.36324e-05	0	0	0.000259626	0.000153707	7.18429e-06	4.60409e-05	1.88915e-05	4.69721e-07	6.1897e-06	2.89334e-05	0.000125421	0.000234792	0.000189596	0.0001502	0.000133167	1.41166e-07	1.07724e-05	9.68191e-05	0	7.87554e-05	3.88718e-05	3.78276e-05	0.000192421	0.000120556	9.94293e-05	0.000186444	0.000325769	5.55034e-05	0.000103062	2.46886e-05	69604.1
		Protein NipSnap homolog 3A OS=Homo sapiens GN=NIPSNAP3A PE=1 SV=2	NIPSNAP3A	3	101.23	9.03548e-07	0	0	3.46841e-06	0	0	0	3.57312e-06	3.8587e-06	0	0	0	0	0	7.20291e-05	2.96494e-05	7.07357e-05	3.15691e-07	1.10044e-06	6.50589e-06	2.55919e-06	0	0	9.37776e-08	1.5008e-06	5.82116e-06	1.36363e-05	1.7975e-05	1.04527e-05	0	0	2.08897e-06	6.78672e-06	28466
		Protein DJ-1 OS=Homo sapiens GN=PARK7 PE=1 SV=2	PARK7	4	101.21	0	7.51066e-06	3.28906e-05	2.25238e-06	0	1.17102e-06	0	3.50823e-07	0	1.07204e-05	8.81037e-07	0	0	0.000192726	7.75469e-05	6.80533e-05	2.05305e-05	6.95158e-06	3.50784e-06	0	6.77901e-06	0.000184089	1.88969e-05	4.29463e-06	4.16993e-07	0	2.14332e-05	2.77914e-05	1.14142e-05	5.93989e-07	0	1.61554e-05	1.19546e-06	19890.3
		Metalloreductase STEAP4 OS=Homo sapiens GN=STEAP4 PE=1 SV=1	STEAP4	3	101.2	0	4.07533e-05	0.000179331	0	0	5.59216e-05	1.46939e-05	5.34865e-05	3.55428e-05	0	4.39351e-06	1.7855e-05	5.87782e-06	7.43229e-05	3.6884e-05	0.000127671	2.7577e-05	0.000215641	0.000108657	6.76513e-05	0.000132147	0	0.000222034	2.12928e-05	2.11336e-05	5.64671e-05	6.07099e-05	7.32454e-05	8.18129e-05	5.46976e-05	1.85188e-05	9.92725e-05	2.73667e-05	51983.8
		Scavenger receptor cysteine-rich type 1 protein M130 OS=Homo sapiens GN=CD163 PE=1 SV=2	CD163	4	101.18	0	1.97621e-05	3.27768e-05	0	0	1.22177e-07	0	0	9.97601e-07	0	0	6.43097e-07	0	2.98462e-05	4.57507e-05	3.52514e-05	4.45871e-05	1.41939e-05	1.5537e-05	2.10179e-06	7.94295e-06	0	8.04137e-06	0	0	3.13179e-07	1.04967e-05	5.45779e-06	9.18788e-06	4.22105e-08	2.56166e-07	1.42489e-05	3.55104e-07	125450
		Pinin OS=Homo sapiens GN=PNN PE=1 SV=4	PNN	3	101.06	4.43157e-05	0	0	0	0	0	0	0	0	0	1.96724e-06	1.45118e-07	0	1.20904e-05	4.03404e-05	5.06868e-06	2.32681e-05	0	4.85122e-08	5.09768e-08	2.05963e-07	0	2.97197e-07	0	0	0	5.29129e-06	3.55114e-08	2.81162e-06	0	0	3.03834e-07	3.49028e-07	81614
		Rho-related GTP-binding protein RhoC OS=Homo sapiens GN=RHOC PE=1 SV=1	RHOC	3	101.03	0	6.94502e-06	4.99696e-05	2.08279e-06	0	2.40382e-06	4.9764e-05	9.483e-05	7.38528e-05	1.04903e-06	1.6239e-06	0.000146017	0.000106778	9.87938e-05	6.40027e-05	7.02116e-05	6.82306e-05	5.42279e-07	5.29182e-05	3.11213e-05	9.44635e-06	8.83154e-06	5.25343e-05	0	0.000121017	5.95956e-06	0	3.78706e-06	5.0041e-08	0	0	0	2.56166e-05	22005.7
		Isochorismatase domain-containing protein 2, mitochondrial OS=Homo sapiens GN=ISOC2 PE=1 SV=1	ISOC2	2	101	0	0	9.12409e-08	0	0	0	0	0	0	0	0	0	0	2.07885e-05	3.56342e-05	2.33399e-05	1.75925e-05	0	0	0	0	0	1.4464e-07	0	0	0	2.50192e-06	1.93083e-06	1.63946e-06	0	0	3.93207e-07	0	22336.6
		Selenium-binding protein 1 OS=Homo sapiens GN=SELENBP1 PE=1 SV=2	SELENBP1	4	100.53	0	3.73479e-05	0.000124929	0.000278222	0	4.65258e-05	0	8.38351e-07	0	0	0	5.61085e-06	0	2.56867e-05	8.0172e-06	1.31047e-05	4.8282e-07	1.02067e-07	1.82627e-05	2.22721e-07	8.53566e-06	0	2.87391e-05	0.000148398	5.25227e-06	0	1.3165e-06	1.7543e-06	2.44703e-06	3.2142e-06	7.14586e-07	8.86332e-07	6.67934e-07	8542.05
		Calcium/calmodulin-dependent protein kinase type II subunit delta OS=Homo sapiens GN=CAMK2D PE=1 SV=3	CAMK2D	2	100.51	6.78555e-07	6.85482e-07	1.69918e-05	0	0	0.000265701	0	0	9.93832e-08	0	9.25207e-07	0	0	2.80461e-05	5.94589e-06	1.81959e-05	3.90824e-05	0.00010739	3.98704e-07	2.91169e-05	8.06228e-05	0	4.57032e-07	3.34019e-07	0	7.67002e-08	6.46148e-05	6.86566e-05	3.93411e-05	0	0	4.13451e-05	9.0058e-06	56370.5
		Cytochrome b-c1 complex subunit 7 OS=Homo sapiens GN=UQCRB PE=1 SV=2	UQCRB	3	100.5	0	1.49023e-07	1.41123e-05	1.36608e-05	0	0	0.000112905	0	0.000122198	0.000894865	0	7.78182e-06	0	3.04127e-05	0.000136923	5.04883e-05	9.68737e-05	5.60014e-06	0	0	0	0	1.81484e-07	4.48849e-06	3.58551e-06	0	4.85829e-06	2.63517e-05	3.42198e-05	0	0	1.97696e-05	9.71313e-06	13529.5
				3	100.32	0	0.00019426	2.97553e-06	0	0	0.000382537	0.00040246	0.000367175	0.00040458	0	0.000726711	0.000312514	0.000340936	1.14797e-05	4.39757e-05	2.19057e-05	5.19358e-05	5.10571e-05	0.000233207	0.000233041	0.000411466	0	0.000231665	1.15683e-06	0.000253758	0.000227822	6.89008e-06	3.40693e-05	0.000159893	0.000413241	0.000168718	1.62679e-05	0.00022121	96562
		SUN domain-containing protein 2 OS=Homo sapiens GN=SUN2 PE=1 SV=3	SUN2	5	100.26	3.86945e-05	0	2.6027e-07	0	0	7.32232e-06	1.23704e-05	1.15893e-05	0	1.50034e-05	0	8.57745e-07	8.05497e-07	1.14836e-05	4.76441e-05	1.47937e-05	3.88632e-05	9.56188e-06	1.00631e-06	3.6387e-06	3.9142e-06	0	2.02827e-06	7.27673e-07	2.44458e-07	2.64367e-05	9.47777e-06	2.35145e-05	1.73127e-05	1.24327e-06	0	2.38002e-06	3.92416e-06	86473.4
		Utrophin OS=Homo sapiens GN=UTRN PE=1 SV=2	UTRN	2	99.99	0	4.45793e-06	1.32061e-05	0	0	4.09463e-06	6.603e-05	3.52626e-06	1.63575e-05	0	2.12946e-06	2.19146e-05	3.34611e-06	2.30463e-05	6.78646e-06	1.26842e-05	2.14768e-05	4.49667e-06	6.1952e-05	5.01862e-05	7.42025e-05	0	1.41373e-05	5.06817e-06	2.28903e-05	7.89746e-06	5.6806e-06	2.1284e-05	4.92846e-06	1.33622e-06	1.64472e-05	1.40466e-05	3.07538e-05	394485
		Schlafen family member 5 OS=Homo sapiens GN=SLFN5 PE=1 SV=1	SLFN5	1	99.79	0	0	1.83519e-06	0	0	0	0	9.58085e-07	0	0	0	0	0	3.33778e-06	2.46375e-05	8.47506e-06	4.44582e-06	3.73558e-06	1.15308e-06	3.97722e-07	1.78527e-06	0	7.47148e-06	0	0	0	5.93593e-06	1.2199e-05	1.01368e-05	2.47097e-07	4.67371e-07	9.68898e-06	9.17322e-07	101059
		Spectrin beta chain, erythrocytic OS=Homo sapiens GN=SPTB PE=1 SV=5	SPTB	6	99.65	0	2.86003e-06	3.69413e-05	0	0	3.10946e-05	1.91216e-05	7.28661e-06	1.85792e-05	0	1.16752e-05	0.000250401	7.16158e-06	0.00011188	2.20681e-05	4.74866e-05	2.6134e-06	9.88761e-05	2.66101e-05	0.000139519	5.21042e-05	0	2.73808e-05	2.20888e-06	0.000143741	0.000126178	0.000175642	0.000328849	4.13293e-05	4.14303e-05	0.000160664	1.32996e-05	0.000518786	246478
		Nuclear pore complex protein Nup93 OS=Homo sapiens GN=NUP93 PE=1 SV=2	NUP93	3	99.57	0	1.4658e-06	1.38226e-05	0	0	4.4296e-06	4.71397e-06	1.55981e-06	9.0258e-06	0	6.44002e-07	0	0	1.88144e-05	7.09355e-05	3.50824e-05	3.89135e-05	1.36866e-05	0	8.85057e-06	1.62751e-05	0	8.10501e-05	0	0	0	1.60667e-05	2.66015e-05	3.04337e-05	1.35974e-06	1.21703e-06	3.43283e-05	2.06158e-05	93492.4
		PDZ and LIM domain protein 7 OS=Homo sapiens GN=PDLIM7 PE=1 SV=1	PDLIM7	2	99.54	0	2.40305e-06	3.77922e-05	8.13329e-05	0	9.54089e-07	3.28079e-05	7.97954e-07	4.22705e-05	4.46261e-06	0	2.36776e-06	9.83283e-07	3.79087e-05	2.63754e-05	5.1486e-05	8.98241e-05	2.16524e-05	5.30006e-06	4.31496e-06	0	0	7.76087e-07	0	1.79122e-06	1.50536e-05	3.55251e-05	6.53665e-05	5.09094e-06	0	0	4.66658e-06	4.30128e-05	49844.1
		KH domain-containing, RNA-binding, signal transduction-associated protein 1 OS=Homo sapiens GN=KHDRBS1 PE=1 SV=1	KHDRBS1	5	99.5	0	0	1.09159e-06	0	0	8.02858e-07	6.33174e-06	1.40949e-05	0	0.000271027	0	0	7.57975e-07	1.82404e-05	2.96336e-05	7.26356e-06	0.000276263	2.00053e-06	1.14012e-07	1.48045e-06	9.19541e-07	0	2.97052e-08	1.04102e-05	0	0	9.78754e-06	6.68863e-06	5.5032e-06	0	0	0	2.04639e-05	48227.7
Core matrisome	Collagens	Collagen alpha-6(VI) chain OS=Homo sapiens GN=COL6A6 PE=1 SV=2	COL6A6	11	99.45	0	2.28327e-05	2.93788e-05	0	0	0.000331787	0.000218332	0.000144635	0.000111082	2.19954e-06	0.000118343	0.000109978	0.000203037	1.75221e-06	1.97478e-05	7.9896e-07	3.85716e-06	0	2.57973e-05	5.31366e-06	0.000173792	1.15386e-05	4.40311e-05	2.89584e-05	0.000233488	4.12225e-06	6.54331e-07	8.02444e-06	1.77283e-05	0.000116071	2.80175e-05	7.00726e-06	7.39153e-07	247187
		HLA class I histocompatibility antigen, A-74 alpha chain OS=Homo sapiens GN=HLA-A PE=1 SV=1	HLA-A	1	99.43	0	0	5.47523e-07	0	0	0	1.76517e-06	1.14119e-06	1.35175e-06	0	2.62178e-05	5.42963e-05	0	2.12367e-07	4.61782e-07	0	0	0	0	0	0	0	9.65125e-07	0	4.32746e-06	0	0	0	0	9.45554e-07	0	0	0	40890.3
		Single-stranded DNA-binding protein, mitochondrial OS=Homo sapiens GN=SSBP1 PE=1 SV=1	SSBP1	2	99.3	3.80487e-06	0	3.22136e-05	0	0	2.23904e-05	1.9229e-05	2.35186e-05	3.15639e-05	0	1.88364e-05	4.34335e-05	1.3948e-05	9.32034e-05	0.000100257	8.77723e-05	1.37951e-05	1.22649e-05	6.90846e-07	1.35575e-05	6.54406e-06	0	3.05465e-05	4.63326e-05	3.32813e-05	2.44022e-05	2.15552e-05	7.22537e-07	1.0505e-05	3.07364e-05	2.57779e-05	1.0129e-05	8.14097e-05	17258.7
Matrisome-associated	ECM Regulators	Cystatin-B OS=Homo sapiens GN=CSTB PE=1 SV=2	CSTB	2	99.25	0	0	0	0	0	0	0	2.37417e-06	8.45621e-07	0	0	0	0	9.27583e-05	3.98414e-05	4.89231e-05	3.65695e-05	1.9282e-06	0	0	7.23156e-07	0	0	0	5.41537e-05	1.28625e-06	8.8323e-07	0	0	0	0	0	0	11137.9
		Coronin-1B OS=Homo sapiens GN=CORO1B PE=1 SV=1	CORO1B	2	99.25	0	1.17609e-06	0	0	0	3.5173e-06	0	0	2.94958e-06	0	1.38248e-06	4.48458e-07	0	0	0	0	1.62868e-05	1.18568e-05	0	2.58025e-06	0	3.70106e-06	1.8948e-06	0	3.15573e-06	0	5.91232e-06	0	0	0	0	0	6.23192e-06	54235.4
		V-type proton ATPase subunit C 1 OS=Homo sapiens GN=ATP6V1C1 PE=1 SV=4	ATP6V1C1	2	99.02	0	0	0	1.57835e-06	0	0	0	0	0	0	9.46132e-07	0	0	4.31819e-06	9.64392e-06	3.96983e-06	4.27213e-05	2.31798e-06	0	0	0	0	0	0	0	0	6.24058e-06	1.23293e-06	1.08137e-06	0	4.58584e-08	3.58147e-07	4.1543e-07	43943.1
		Acyl-coenzyme A thioesterase 2, mitochondrial OS=Homo sapiens GN=ACOT2 PE=1 SV=6	ACOT2	3	98.98	0	5.85423e-06	7.77626e-05	0	0	0	5.55601e-05	3.96384e-07	6.76284e-06	0	7.14093e-06	8.55437e-07	3.32599e-07	4.02549e-06	9.98998e-06	1.64119e-05	2.61447e-06	3.40358e-07	7.02792e-07	1.04716e-06	0	1.44417e-05	3.89743e-05	1.6959e-05	3.52232e-06	0	0	6.47596e-06	1.56361e-05	4.19105e-06	6.97006e-06	6.07006e-06	0	53219.7
		60S ribosomal protein L24 OS=Homo sapiens GN=RPL24 PE=1 SV=1	RPL24	3	98.96	0	3.31089e-06	2.54843e-05	7.83126e-07	0	3.0967e-05	2.59589e-05	7.76037e-06	4.49399e-05	0	0	2.42606e-05	8.7604e-07	9.32101e-05	0.000108222	0.00011058	0.000154262	0.000160216	3.99939e-07	4.63652e-05	1.51397e-06	2.01565e-06	0	1.66867e-07	1.41567e-06	6.13922e-05	0.000209314	7.38063e-05	5.85947e-05	0	8.50958e-05	0.000174361	9.46015e-05	17778.1
		Glycylpeptide N-tetradecanoyltransferase 1 OS=Homo sapiens GN=NMT1 PE=1 SV=2	NMT1	1	98.9	0	0	3.82054e-06	0	0	0	0	0	0	0	0	0	0	3.09422e-06	1.11026e-05	5.29601e-06	5.60319e-08	0	0	0	0	0	0	0	0	0	0	0	0	0	0	0	1.98976e-08	183173
		Rab GDP dissociation inhibitor alpha OS=Homo sapiens GN=GDI1 PE=1 SV=2	GDI1	4	98.88	1.95817e-05	7.35028e-06	7.59823e-05	1.51901e-05	5.49051e-05	1.22719e-06	8.48043e-06	0	1.54182e-05	1.97617e-05	0	4.21832e-07	1.52597e-06	0.000109192	4.12752e-05	0.000104221	2.78185e-05	1.04473e-05	2.4186e-07	7.31399e-07	0	0	3.87746e-06	2.84001e-06	1.33081e-05	1.43537e-07	4.67599e-06	1.79883e-05	4.76368e-06	1.0255e-06	8.01341e-06	6.24262e-06	3.50217e-06	50584.2
		Calponin-1 OS=Homo sapiens GN=CNN1 PE=1 SV=2	CNN1	2	98.87	0	4.95506e-07	0	0	0	4.14596e-05	3.05954e-05	0	2.78091e-05	1.78534e-06	2.83203e-05	3.2515e-07	0	3.12397e-05	1.93227e-05	1.4537e-05	5.04069e-05	5.47413e-06	0	0	0	0	0	0	4.20085e-06	1.77079e-05	1.83251e-05	2.21272e-05	0	6.19497e-07	0	1.51039e-05	0	33169.9
		Pyridoxal kinase OS=Homo sapiens GN=PDXK PE=1 SV=1	PDXK	2	98.71	0	3.05063e-06	0	0	0	0	0	0	0	0	7.6282e-07	3.19144e-05	2.46208e-05	2.38383e-05	0	2.56732e-05	3.60369e-06	2.45652e-07	5.31665e-07	0	0	0	6.54213e-08	0	0	0	5.85736e-07	6.90822e-07	0	9.42807e-06	0	0	0	35102
		ADP-ribosylation factor 3 OS=Homo sapiens GN=ARF3 PE=1 SV=2	ARF3	2	98.4	0.00129345	5.6759e-06	0.000108784	0	0	0	1.51035e-05	1.38471e-05	0	0	3.39266e-06	4.45625e-05	6.77835e-05	0.000107846	0.000141436	0.000141815	0.000136506	2.64291e-05	3.62149e-06	2.37706e-05	1.06638e-05	0	4.34536e-05	1.51557e-05	4.77848e-05	8.1298e-07	0	3.30225e-07	2.78557e-05	5.0361e-05	4.00324e-05	7.57205e-05	3.99553e-05	20600.4
		Fumarate hydratase, mitochondrial OS=Homo sapiens GN=FH PE=1 SV=3	FH	5	98.32	0	1.59195e-05	9.46548e-05	0	0	0	0.000136253	0	4.2768e-05	0	0	3.20255e-05	5.90872e-07	0.000101284	0.000186661	0.000135262	4.87554e-05	7.46868e-06	4.25384e-06	2.87253e-05	2.7054e-05	8.94168e-07	0.000123899	7.5518e-06	3.36401e-07	2.64705e-06	3.24335e-05	3.92616e-05	4.18602e-05	1.88694e-05	1.09379e-05	7.15936e-06	3.94419e-05	54638.2
		Pyruvate dehydrogenase E1 component subunit alpha, somatic form, mitochondrial OS=Homo sapiens GN=PDHA1 PE=1 SV=3	PDHA1	7	98	0	3.0222e-05	0.000223481	0.000825173	0	0.000231541	0.000250827	0.000872847	0.000409497	9.9534e-05	1.78363e-05	0.00138822	0.000147946	0.000166134	0.000210696	0.000183891	7.33739e-05	8.82083e-05	0.000370438	4.04134e-05	0.000180402	0	0.000348867	1.36021e-06	0.00013605	0.000109388	0.000765571	0.000148587	0.000182582	0.000217824	0.000114129	8.27125e-05	0.000125223	43296.1
		Surfeit locus protein 4 OS=Homo sapiens GN=SURF4 PE=1 SV=3	SURF4	3	97.94	0	9.46338e-07	0	1.67556e-05	0	0	1.8065e-05	0.000110996	1.57918e-05	2.55174e-06	0	1.92777e-06	2.08537e-07	3.20629e-05	6.02371e-05	2.80995e-05	0.000129459	6.72088e-07	0	2.79036e-06	2.19128e-06	0	2.03538e-07	4.01562e-05	0	4.83493e-06	0	7.48448e-06	8.57115e-06	0	6.75429e-07	3.33197e-07	2.96717e-06	30394.8
		Proliferation-associated protein 2G4 OS=Homo sapiens GN=PA2G4 PE=1 SV=3	PA2G4	7	97.92	3.09173e-07	1.19685e-05	7.03618e-05	0.000325979	0.000527762	3.17334e-05	0.000394718	6.51262e-05	0.000166635	5.42527e-06	0.00018106	0.00020949	3.96752e-05	0.000106003	0.000263075	0.000189386	0.000105295	0.000103788	9.34759e-05	7.72917e-05	0.000119456	0	0.000262892	6.47624e-05	4.10909e-05	6.16069e-05	8.49195e-05	5.39964e-05	0.000209606	0.000205622	0.000277961	0.000108368	0.000312373	43786.9
		60S acidic ribosomal protein P1 OS=Homo sapiens GN=RPLP1 PE=1 SV=1	RPLP1	4	97.63	0	9.31141e-05	0.000106235	9.4792e-06	0	0	7.89704e-07	0.00018338	0	0	0	0.000103157	0	0.000428231	0.00024263	0.000198049	0.000141088	0.000109063	7.09666e-05	0.000251767	0.000210922	0	0.000227218	0	0	0.000111702	0.000316364	8.7409e-05	0.000126825	0	0.000169089	0.000142834	0.000655339	11512.6
		Titin OS=Homo sapiens GN=TTN PE=1 SV=4	TTN	8	97.5869	0	0.000157376	0.000136317	0	0	0.000313955	0.000348384	0.000690946	0.000462002	0	0.000583179	0.00047972	0.000705019	0.00070724	0.000360394	0.000944346	0.000465611	0.000456522	0.000239673	0.000370925	0.000293701	1.73109e-05	0.000388673	0.00065653	0.000598142	0.00029953	0.000464799	0.000401483	0.000713367	0.000435727	0.000242398	0.000444445	0.000558398	3.63085e+06
		Hydroxysteroid dehydrogenase-like protein 2 OS=Homo sapiens GN=HSDL2 PE=1 SV=1	HSDL2	1	97.49	0	3.2213e-06	2.84124e-06	0	0	2.13642e-05	5.54495e-05	0	5.579e-05	0	0	0	0	5.38506e-06	1.2891e-05	0	2.11078e-05	4.22784e-07	1.39327e-06	2.71139e-06	1.97365e-06	0	2.61738e-05	0	0	8.15953e-07	1.16506e-05	7.83629e-06	1.38926e-05	0	0	3.80084e-06	0	45396.3
Core matrisome	ECM Glycoproteins	Latent-transforming growth factor beta-binding protein 1 OS=Homo sapiens GN=LTBP1 PE=1 SV=4	LTBP1	6	97.39	0	2.66784e-05	4.91886e-05	0	0	7.17017e-05	5.76537e-05	0	4.39339e-05	0	1.28499e-06	6.76264e-06	1.38079e-05	2.69709e-05	4.84449e-06	1.37611e-05	7.68649e-05	0.000230768	2.69883e-05	0.000855283	2.82794e-05	0.000616065	1.98645e-05	1.95109e-05	1.55164e-06	6.38436e-05	0.000130731	8.94505e-05	7.63748e-05	6.05167e-06	1.22743e-05	0.000148439	0.000168007	186794
		Heterogeneous nuclear ribonucleoprotein H3 OS=Homo sapiens GN=HNRNPH3 PE=1 SV=2	HNRNPH3	5	97.3769	4.11753e-07	0	2.58843e-05	3.01972e-06	0	2.51391e-06	2.36398e-07	1.64803e-06	1.9031e-06	3.61293e-05	3.89896e-06	3.64131e-05	5.2798e-06	0.000242427	0.000254938	0.000152242	5.40616e-05	7.00565e-06	1.03849e-05	2.91366e-06	2.06915e-06	3.2833e-06	9.96228e-06	7.23798e-06	9.63224e-06	4.0987e-06	1.02081e-05	3.3751e-05	1.62157e-05	1.13753e-06	1.79142e-06	1.77688e-05	1.59222e-05	36926.4
		Serine/threonine-protein phosphatase PP1-beta catalytic subunit OS=Homo sapiens GN=PPP1CB PE=1 SV=3	PPP1CB	1	97.22	0	0	2.31508e-05	0	0	0	4.07951e-06	0	1.1169e-05	0	7.72118e-06	9.86047e-06	0	1.42423e-05	1.70847e-05	2.13377e-05	1.63707e-05	0	3.42985e-06	0	0	0	1.01475e-05	0	2.61992e-05	0	0	0	0	0	2.5579e-06	2.77177e-06	0	37187.4
		Coatomer subunit delta OS=Homo sapiens GN=ARCN1 PE=1 SV=1	ARCN1	2	97.12	0	2.45289e-07	4.09284e-06	0	0	0	0	1.14155e-07	0	0	0	5.16185e-07	0	3.89713e-05	6.24829e-05	5.03842e-05	3.81853e-05	2.99035e-06	3.12993e-07	0	1.55209e-06	0	2.50709e-07	9.47562e-08	1.36328e-06	0	1.33954e-05	1.43433e-05	1.385e-05	2.42853e-07	0	1.09888e-05	1.20742e-06	57211.6
		Hepatoma-derived growth factor-related protein 3 OS=Homo sapiens GN=HDGFRP3 PE=1 SV=1	HDGFRP3	2	97.12	0	0	0	2.25326e-05	0	0	0	0	3.62743e-07	0	0	1.21707e-06	0	2.63868e-05	5.1666e-05	8.71518e-06	4.97804e-05	0	0	2.47868e-05	0	0	0	0	0	8.78287e-05	5.19796e-07	1.58079e-05	8.98363e-06	8.29948e-06	2.56892e-07	5.88046e-06	9.30297e-07	22618.8
		Transmembrane protein 165 OS=Homo sapiens GN=TMEM165 PE=1 SV=1	TMEM165	1	97.02	0	0	1.32184e-07	0	0	9.70455e-07	4.32812e-07	0	0	0	3.5965e-06	0	0	2.19003e-06	9.13163e-06	5.20272e-06	2.63508e-05	4.75551e-07	0	0	0	0	1.63826e-07	1.44811e-06	0	0	0	1.3601e-06	9.68516e-07	0	0	0	0	34906.2
		Nuclear transport factor 2 OS=Homo sapiens GN=NUTF2 PE=1 SV=1	NUTF2	1	96.99	0	0	0	0	0	0	0	0	0	0	0	0	0	2.33969e-05	0	5.98017e-06	1.86547e-06	0	0	0	0	0	0	0	0	0	0	0	0	0	0	0	0	14477.2
		Histone H1.1 OS=Homo sapiens GN=HIST1H1A PE=1 SV=3	HIST1H1A	2	96.67	0	0.000504252	0.00152481	0	2.72001e-05	0.00401366	0.0027778	0.00241373	0.00285614	0	0.0014873	0.00150137	0.000770298	0.00137655	0.00501953	0.00234959	0.00250764	0.00305732	0.000622684	0.00128537	0.00138464	0.000663894	0.00200738	0.00137492	0.00312164	0.00281302	0.0026605	0.00291189	0.00649411	0.000559415	0.0035823	0.00516732	0.00454172	36238.6
Core matrisome	Collagens	Collagen alpha-1(II) chain OS=Homo sapiens GN=COL2A1 PE=1 SV=3	COL2A1	4	96.64	0	6.60816e-05	3.67031e-05	0.000177892	0	0	1.58042e-05	6.33351e-05	2.75763e-05	0.000444648	0	3.87622e-06	0	0	7.19755e-05	9.19508e-06	1.8709e-05	0.000921949	5.55092e-05	0.000281839	0.000163231	0.00288223	5.70194e-05	0.0102608	1.09189e-05	0.000104497	0.000511867	0.000218431	0.000317088	0.000153587	0.000207753	0.000265399	0.00013288	141788
		Nucleobindin-1 OS=Homo sapiens GN=NUCB1 PE=1 SV=4	NUCB1	2	96.37	0	0	0	0	0	0	0	0	0	0	0	0	2.28219e-07	4.60628e-05	4.70141e-05	2.64008e-05	2.32232e-05	0	1.57957e-06	0	0	0	0	0	0	0	5.90494e-06	1.11607e-05	1.33257e-06	1.36574e-07	0	4.33705e-06	0	53879.3
		ATP-binding cassette sub-family A member 8 OS=Homo sapiens GN=ABCA8 PE=1 SV=3	ABCA8	4	96.31	0	4.01807e-06	2.63832e-05	2.70081e-06	0	1.76067e-06	1.34254e-05	2.18954e-06	2.79293e-05	8.537e-06	1.03985e-06	0.000148437	5.94624e-06	1.78226e-06	9.70389e-06	1.67753e-06	8.70042e-07	1.07509e-06	7.21908e-06	8.55702e-06	2.39926e-05	0	3.36268e-05	2.57788e-06	0	6.51037e-06	5.51044e-06	2.5719e-05	2.73286e-05	7.45904e-07	3.29878e-06	1.21599e-06	6.98953e-07	179258
		Protein FAM162A OS=Homo sapiens GN=FAM162A PE=1 SV=2	FAM162A	2	96.3	0	0	4.4417e-06	7.64144e-06	0	3.57683e-07	2.878e-06	0	7.06644e-06	0	0	2.7654e-07	1.77179e-06	5.46183e-05	0.000103349	5.87332e-05	0	5.52036e-06	0	9.46905e-07	0	0	2.29509e-05	3.21754e-06	0	0	2.06151e-05	1.25481e-05	8.26655e-06	0	0	1.47045e-05	1.75277e-06	17341.6
		Cytochrome c OS=Homo sapiens GN=CYCS PE=1 SV=2	CYCS	4	96.21	6.48686e-07	0	2.99814e-07	3.64888e-06	0	3.4329e-06	6.09651e-07	1.72094e-06	0	0	0	0	3.80427e-06	2.38658e-05	0.000480336	7.29485e-05	0.00015482	0	1.55677e-06	4.42729e-07	0	6.86263e-07	1.15189e-06	0	3.45868e-06	0	1.86559e-05	1.77095e-05	1.15863e-05	0	0	0	2.91062e-07	11747.6
		V-type proton ATPase subunit B, brain isoform OS=Homo sapiens GN=ATP6V1B2 PE=1 SV=3	ATP6V1B2	1	96.2	0	0	0	1.175e-05	0	0	0	0	1.072e-06	0	0	1.22165e-07	0	1.65151e-05	9.43003e-06	1.18544e-05	3.90649e-05	4.03087e-06	0	4.26349e-07	5.00107e-08	0	0	0	0	1.14619e-06	2.6949e-05	9.54053e-06	2.70092e-06	0	0	7.2474e-07	1.34286e-06	56502.5
		Alcohol dehydrogenase 4 OS=Homo sapiens GN=ADH4 PE=1 SV=5	ADH4	2	96.19	0	0.000401359	0.000280799	0	0	9.36585e-07	3.61623e-05	3.7846e-05	1.34269e-05	0	0	0.000294193	0	9.66991e-05	5.5261e-05	6.85106e-05	1.65502e-06	3.64681e-06	6.83312e-05	2.02913e-05	0.000120561	0	9.1352e-05	3.39364e-07	7.16137e-05	0.000120287	3.73573e-05	3.56585e-05	5.35398e-05	6.92445e-06	9.31356e-06	2.12016e-05	5.58638e-06	40222.5
		Complement component 1 Q subcomponent-binding protein, mitochondrial OS=Homo sapiens GN=C1QBP PE=1 SV=1	C1QBP	4	96.11	3.93468e-06	2.81374e-05	3.56599e-05	0	0	5.25767e-05	1.31754e-05	2.55478e-06	2.0546e-06	0	6.42624e-07	7.71793e-07	0	0.000130916	0.000239385	0.000167786	5.91505e-05	3.10949e-05	0.000135647	2.39382e-05	4.09925e-05	0	4.98722e-05	4.93364e-05	1.84071e-06	4.38896e-05	6.73616e-05	5.98197e-05	6.93636e-05	7.69311e-06	6.35113e-05	4.68938e-05	5.41103e-05	31361.8
		Procollagen galactosyltransferase 1 OS=Homo sapiens GN=GLT25D1 PE=1 SV=1	GLT25D1	4	95.97	0	0	4.73742e-05	0	0	2.4258e-05	0.000145203	8.32704e-05	0.000115633	0	0	0.000136404	0.000126051	2.61277e-05	9.8403e-05	6.93498e-05	8.94861e-05	1.3427e-05	5.56545e-05	2.80761e-05	7.43428e-05	1.02376e-05	5.36579e-05	0	0.000202794	5.65511e-05	7.58388e-05	7.95557e-05	4.88483e-05	6.94921e-05	5.93874e-05	3.5904e-05	3.69243e-05	71638.4
		Adenylate kinase isoenzyme 1 OS=Homo sapiens GN=AK1 PE=1 SV=3	AK1	2	95.94	0	0	6.91831e-08	0	0	0	8.30165e-07	0	0	0	0	0	3.23933e-07	5.03092e-05	7.11927e-06	3.31117e-05	3.20758e-05	1.22093e-07	0	3.47672e-06	8.78008e-08	0	2.17212e-07	2.02125e-07	0	2.81172e-07	8.25425e-06	1.83042e-05	2.50863e-06	0	1.80426e-07	1.64644e-07	3.6165e-06	21634.3
		Amine oxidase [flavin-containing] B OS=Homo sapiens GN=MAOB PE=1 SV=3	MAOB	4	95.7	0	5.27925e-06	0.000226275	5.4176e-06	0	2.24926e-05	0.000128857	3.38618e-06	0.000138197	5.45883e-07	0	6.77419e-05	2.50626e-05	9.80022e-06	1.56948e-05	2.06856e-06	1.8327e-05	5.58097e-06	4.49128e-05	4.46524e-05	7.6674e-05	1.01336e-06	0.000151771	0	0.000146923	1.81515e-05	9.81174e-06	9.47519e-06	5.00795e-05	1.70702e-05	1.43531e-05	2.83472e-05	0	58764.3
		Angiotensin-converting enzyme OS=Homo sapiens GN=ACE PE=1 SV=1	ACE	1	95.66	0	0	9.03301e-07	0	0	0	0	0	0	0	0	0	0	1.53803e-06	0	0	0	2.11931e-05	4.06991e-06	3.75095e-06	1.05344e-05	0	2.19717e-05	0	0	0	6.17625e-06	1.96326e-06	4.29724e-06	0	0	5.66482e-06	0	19503.6
		Synaptopodin OS=Homo sapiens GN=SYNPO PE=1 SV=2	SYNPO	1	95.65	0	1.28612e-05	1.07423e-05	0	0	8.42458e-06	1.94564e-05	6.30117e-07	7.01625e-06	0	8.55287e-06	4.93664e-07	0	9.14669e-06	1.14735e-05	1.81111e-06	2.69735e-05	6.85768e-06	1.39621e-06	1.07844e-05	4.683e-06	0	7.75934e-06	0	0	0	9.82661e-06	1.29919e-05	1.1075e-05	0	5.15162e-07	1.04047e-05	1.59952e-05	99465
		Beta-2-microglobulin OS=Homo sapiens GN=B2M PE=1 SV=1	B2M	4	95.64	0	0	1.05308e-05	0	4.63355e-06	3.65488e-06	1.29865e-05	1.53107e-05	0.000124425	0	0.000655795	3.70497e-05	0.00263434	0.000191638	0.000408674	0.000155221	0.000295531	1.08013e-05	5.99472e-05	3.35329e-05	2.4825e-06	0	0	1.83323e-07	4.58395e-06	4.48096e-07	6.81502e-05	1.9165e-05	3.50019e-05	5.72106e-07	2.50355e-07	4.80556e-06	4.68406e-05	13713.4
		Caprin-1 OS=Homo sapiens GN=CAPRIN1 PE=1 SV=2	CAPRIN1	3	95.48	0	0	2.50045e-07	2.60552e-06	0	7.77666e-06	3.87688e-07	1.96686e-07	0	0	8.3997e-07	1.58758e-05	3.30462e-06	2.08645e-06	2.23562e-06	3.74995e-07	4.6585e-05	2.39927e-07	4.24568e-08	3.07021e-06	0	0	0	1.74515e-06	2.6069e-05	2.9811e-06	5.69852e-07	0	5.81355e-06	0	6.37027e-06	0	1.08868e-05	78365.8
		Leukotriene A-4 hydrolase OS=Homo sapiens GN=LTA4H PE=1 SV=2	LTA4H	3	94.87	5.02193e-06	2.38564e-06	4.44755e-05	5.89265e-06	0	6.74576e-06	6.10884e-07	3.72793e-06	1.4731e-05	0	0	2.32824e-06	3.7855e-06	4.68402e-05	1.2639e-05	3.79918e-05	2.12555e-06	9.54852e-06	1.44674e-07	1.58228e-06	2.06311e-07	8.59146e-05	0	0	1.2389e-06	1.10084e-06	0	2.1999e-06	5.23719e-07	3.18817e-07	7.70715e-06	7.78028e-06	4.04645e-06	69287.6
		Metaxin-1 OS=Homo sapiens GN=MTX1 PE=1 SV=2	MTX1	2	94.79	0	6.09787e-08	0	0	0	0	1.92759e-07	3.31723e-07	4.5762e-07	0	0	0	4.39455e-07	5.77253e-06	7.58045e-05	2.1018e-05	1.53138e-05	4.24564e-08	2.89483e-06	0	3.50079e-07	0	2.4718e-06	4.40286e-07	0	0	1.6665e-06	2.10352e-06	8.65579e-06	0	2.07233e-07	4.438e-06	0	51477.6
		Ras-related protein Rab-35 OS=Homo sapiens GN=RAB35 PE=1 SV=1	RAB35	1	94.69	0	1.59018e-05	3.19479e-05	0	0	3.4243e-05	5.06664e-05	3.55111e-05	3.91487e-05	0	0	5.14916e-05	5.31495e-05	7.76009e-05	9.95404e-05	8.76538e-05	0.000141615	2.76491e-05	6.65184e-05	1.09396e-05	5.52923e-05	0	3.54488e-05	0	6.90338e-05	1.04742e-05	6.66731e-05	8.86709e-05	3.51894e-05	4.7291e-05	1.54587e-05	6.25442e-05	2.87386e-05	23024.5
		Plakophilin-2 OS=Homo sapiens GN=PKP2 PE=1 SV=2	PKP2	3	94.66	0	0	0	0	0	9.82122e-07	0	0	0	2.46485e-05	0	0	0	1.46536e-05	9.45861e-05	0	1.11134e-06	0	0	2.68501e-07	0	0	0	0	0	0	0	2.13714e-06	0	0	0	9.47939e-07	4.50602e-06	97417.9
		Putative inactive carboxylesterase 4 OS=Homo sapiens GN=CES1P1 PE=5 SV=2	CES1P1	2	94.61	0	5.86337e-05	2.25772e-05	0	0	0	2.90048e-06	0	0	0	0	0	0	1.29888e-05	0	4.03883e-06	0	1.134e-06	3.19615e-05	3.67278e-06	4.42077e-05	0	3.74314e-05	0	0	0	4.32874e-06	1.03247e-06	0	0	0	0	0	30678.8
		Peptidyl-prolyl cis-trans isomerase A-like 4A/B/C OS=Homo sapiens GN=PPIAL4A PE=1 SV=1	PPIAL4A	1	94.58	0	1.56768e-05	5.55244e-05	0	0	0	9.30634e-07	0	0	0	0	0	9.26957e-07	0.000933467	0.00032332	0.000324214	0.000353586	1.37494e-05	6.71441e-06	0	2.89837e-06	0	1.78637e-05	0	0	0	8.6775e-05	8.51817e-05	4.24695e-05	0	1.47213e-05	9.50481e-05	3.09718e-05	18181
		40S ribosomal protein S4, Y isoform 2 OS=Homo sapiens GN=RPS4Y2 PE=1 SV=3	RPS4Y2	3	94.57	0	2.86585e-06	0	0	3.55441e-05	0	3.52834e-06	0	0	0	0	0	0	3.02292e-05	3.89326e-05	2.63663e-05	5.85497e-05	0	0	2.05123e-06	0	0	2.40709e-06	0	1.27723e-05	1.96696e-06	1.83738e-05	2.23702e-06	0	0	6.32349e-07	0	6.85367e-06	29295.5
		SUMO-conjugating enzyme UBC9 OS=Homo sapiens GN=UBE2I PE=1 SV=1	UBE2I	1	94.36	0	0	4.2928e-07	2.27283e-05	0	0	0	0	0	0	0	4.3442e-07	0	3.71412e-05	2.24691e-05	2.55876e-05	1.7468e-05	2.13267e-06	0	1.82497e-07	0	0	0	0	0	0	1.35245e-05	1.35613e-05	1.69338e-05	0	0	1.32224e-05	1.82784e-06	18005.9
		Programmed cell death 6-interacting protein OS=Homo sapiens GN=PDCD6IP PE=1 SV=1	PDCD6IP	3	94.19	0	2.43882e-06	3.99714e-05	0	0	0	0	0	0	0	0	0	0	3.77871e-05	6.73439e-05	4.02574e-05	5.60088e-05	1.40488e-05	0	1.70585e-06	7.43734e-08	0	2.14215e-06	0	0	1.11289e-07	2.09842e-05	9.20335e-06	3.85746e-06	0	0	2.40684e-06	5.03895e-06	96026.9
		Proteasome subunit alpha type-4 OS=Homo sapiens GN=PSMA4 PE=1 SV=1	PSMA4	1	94.13	0	1.73821e-07	4.38363e-06	0	0	0	0	3.91228e-07	0	0	0	3.86968e-06	4.16805e-07	6.88168e-06	5.79234e-06	1.08826e-05	3.65927e-06	3.54386e-07	0	0	0	0	3.5519e-07	0	0	4.33621e-06	3.50654e-07	0	0	0	0	0	4.46657e-07	29483.8
		Ras-related protein R-Ras OS=Homo sapiens GN=RRAS PE=1 SV=1	RRAS	2	93.92	0	8.75326e-06	4.2614e-06	4.27881e-06	0	9.29344e-06	4.72857e-05	4.69717e-07	1.71107e-06	0	0	1.14691e-05	5.34635e-05	2.96062e-05	3.32009e-05	2.81585e-05	5.24877e-06	2.66669e-07	0	0	7.63673e-06	0	3.01494e-06	2.18088e-05	0	0	6.57498e-06	1.12077e-05	5.28343e-06	0	1.67693e-06	4.6298e-06	0	23479.7
		Isoleucine--tRNA ligase, mitochondrial OS=Homo sapiens GN=IARS2 PE=1 SV=2	IARS2	1	93.82	0	0	0	0	0	6.85783e-08	0	0	0	0	0	0	0	0	1.3045e-05	4.4138e-07	0	0	0	0	0	0	0	0	0	0	0	0	0	0	0	0	0	113796
		Eukaryotic translation initiation factor 3 subunit B OS=Homo sapiens GN=EIF3B PE=1 SV=3	EIF3B	2	93.74	0	0	8.70613e-06	0	0	0	0	0	0	0	0	7.32633e-07	0	1.47389e-05	2.07996e-05	1.7355e-05	7.6462e-06	1.82907e-06	0	5.24619e-07	0	0	0	0	0	3.59327e-07	4.30398e-06	1.57174e-06	2.68306e-06	2.19101e-07	0	2.14726e-06	1.752e-06	92484
		Bifunctional glutamate/proline--tRNA ligase OS=Homo sapiens GN=EPRS PE=1 SV=5	EPRS	2	93.63	0	0	0	0	0	4.02904e-05	9.98294e-07	0	1.92173e-05	0	0	0	0	0	2.01774e-06	2.93862e-06	1.19869e-05	0	0	0	0	6.5991e-07	0	0	1.34768e-06	0	0	0	0	0	0	0	6.46875e-07	170598
		Cytoplasmic FMR1-interacting protein 1 OS=Homo sapiens GN=CYFIP1 PE=1 SV=1	CYFIP1	1	93.35	0	0	0	4.33026e-06	0	0	0	0	0	0	0	0	0	0	3.94907e-06	9.34703e-07	6.63528e-06	0	0	0	0	0	0	0	0	0	2.1363e-06	8.25766e-07	1.36718e-06	0	0	0	0	145190
		Phosphoglycerate mutase 2 OS=Homo sapiens GN=PGAM2 PE=1 SV=3	PGAM2	2	93.13	0	8.11603e-06	6.35077e-05	0	0	0	0	0	0	0	0	0	0	6.45535e-05	1.23351e-05	5.93479e-05	2.24831e-08	0	0	0	0	0	0	0	0	0	0	0	0	0	0	0	0	28765.8
		ATP-dependent RNA helicase DDX3Y OS=Homo sapiens GN=DDX3Y PE=1 SV=2	DDX3Y	3	93.11	8.45589e-07	0	1.13869e-05	1.1683e-05	0	6.15444e-06	3.61882e-06	5.76353e-06	1.84976e-06	0	0	0	6.61223e-07	8.34997e-05	0.000173566	0.000126524	0.000136243	8.37522e-06	1.53796e-06	6.51534e-06	9.42123e-07	0	2.90382e-07	1.93296e-06	0	2.82591e-06	5.74707e-05	6.04377e-05	4.45646e-05	0	3.76756e-06	1.03253e-06	1.42581e-05	73156
		60S ribosomal protein L30 OS=Homo sapiens GN=RPL30 PE=1 SV=2	RPL30	2	92.99	0.000619194	2.21095e-05	3.94909e-05	8.5017e-06	0	0	0	0	0	0	0	1.76214e-05	2.78994e-07	0.000118088	0.000219047	0.000146059	0.000168299	4.58965e-05	2.95154e-05	1.92844e-05	2.75113e-05	0	3.47497e-05	5.10648e-06	1.91409e-05	1.8142e-06	0.000134518	0.000100755	0.000103946	3.10091e-06	1.30915e-06	0.00011262	2.03253e-05	12783.1
		Bactericidal permeability-increasing protein OS=Homo sapiens GN=BPI PE=1 SV=4	BPI	4	92.97	1.75532e-06	0	0	0	0	0	1.47861e-05	9.8527e-05	0	1.65842e-05	0.000115894	2.3619e-05	0.000368051	0	2.00695e-07	5.56683e-07	2.74293e-06	0	3.37957e-05	2.74338e-06	4.16899e-05	0	1.07929e-05	0	0.0002092	1.61166e-07	0	1.4097e-06	5.03804e-07	9.20891e-06	7.41411e-05	1.966e-06	2.76635e-08	15206.3
		Heat shock protein beta-6 OS=Homo sapiens GN=HSPB6 PE=1 SV=2	HSPB6	5	92.8	0	0.000102138	0.000242232	0	0	1.52206e-06	2.32727e-05	7.08018e-05	4.89199e-06	0	0	0.000196703	8.77481e-05	0.000233917	5.26245e-05	4.68589e-05	1.34237e-05	1.15588e-05	8.34558e-05	4.96102e-05	1.51077e-05	4.88476e-06	1.68923e-05	2.99018e-05	9.14459e-05	2.28391e-05	0.000123214	4.05703e-05	7.41099e-05	2.536e-05	1.41405e-05	2.78195e-05	2.41473e-05	17134.2
[truncated: 656 more rows]
