# Supplementary material for: Deconstruction of a Metastatic Tumor Microenvironment Reveals a Common Matrix Response in Human Cancers
Source: Oxford University Press journal article supplement (doi:10.1158/2159-8290.cd-17-0284), 2017-12-01
Supplement: 21598290cd170284-sup-180566_3_supp_4416933_p04mfv.xlsx [file 21598290cd170284-sup-180566_3_supp_4416933_p04mfv.xlsx]

## Sheet: Table S4
Supplementary Table 4: RNA-Seq matrix of log2 counts-per-million (cpm)
ensembl_gene_id	hgnc_symbol	gene_biotype	G8	G10	G11	G15	G17	G29	G30	G33	G35	G36	G42	G43	G51	G54	G57	G58	G67	G69	G72	G75	G76	G77	G79	G81	G82	G85	G88	G92	G93	G94	G102	G124	G136	G138	G144
ENSG00000000003	TSPAN6	protein_coding	5.54858	5.02131	5.81877	5.28867	5.54921	4.15232	4.97856	4.62626	6.87878	5.28326	5.14905	5.51739	5.72025	5.48427	5.02641	5.7577	4.68277	7.01657	6.00241	5.62581	6.10087	4.84824	5.42206	5.88323	6.01233	5.42806	5.21983	6.32842	5.33654	5.9891	5.66071	6.00442	5.28401	5.89508	5.27588
ENSG00000000005	TNMD	protein_coding	3.51515	1.53589	2.26029	1.83003	0.784515	-0.477937	1.25007	0.472813	5.8185	2.10454	2.62788	3.06463	4.44244	1.73248	1.39079	5.31074	-0.984095	3.49886	5.28136	0.384561	3.36288	-1.67497	1.44085	4.56755	-0.742691	2.6741	1.67433	4.55337	0.944559	2.90041	1.97282	-0.640032	-2.11511	1.41699	2.24526
ENSG00000000419	DPM1	protein_coding	5.20638	4.51254	5.25445	5.35527	5.16515	4.62219	4.81455	4.59151	5.39759	5.18995	4.63813	4.93936	6.15479	5.57619	4.79894	5.1184	4.99433	6.22671	4.84157	5.19048	5.64083	5.02659	5.2841	5.86067	4.84737	4.9345	4.6773	5.04122	5.01357	5.38334	4.69783	5.06125	4.84211	4.59158	5.17295
ENSG00000000457	SCYL3	protein_coding	3.1874	3.42771	3.25573	3.25386	3.54262	3.81036	3.97426	3.76874	3.46109	3.57296	3.59115	4.1127	3.35001	2.88816	3.73033	3.79016	3.71265	4.76398	4.01933	3.42787	3.75269	3.09683	3.67506	3.54306	2.83196	3.44452	4.05592	3.72028	3.71684	3.92097	3.83149	3.35168	4.58334	3.70618	4.21708
ENSG00000000460	C1orf112	protein_coding	1.99182	2.72175	2.26885	2.81301	2.09427	2.0675	2.10483	2.17182	2.23394	2.2075	2.43299	1.96982	1.91685	2.06161	1.73177	2.00791	2.22833	1.84179	1.85664	1.48305	1.77144	2.1404	4.10846	1.50392	3.30325	2.50828	2.08928	1.8354	1.98744	1.69308	2.12589	3.53995	4.43201	2.22318	1.7098
ENSG00000000938	FGR	protein_coding	4.34663	4.17609	4.56626	3.4454	4.39488	6.32516	3.84233	3.16238	5.38577	5.54375	4.33734	5.02656	6.15479	5.49906	2.75923	4.24397	4.71293	6.20666	4.07949	4.54725	4.6187	5.53948	3.17947	6.52382	2.29523	5.10154	4.15478	5.08927	4.08967	5.94821	3.95107	2.50209	2.34797	2.55142	5.1061
ENSG00000000971	CFH	protein_coding	9.22628	8.90693	7.27207	6.45526	8.0818	7.62401	8.69502	7.92065	7.82869	8.60493	8.41489	7.52882	8.64931	9.45497	8.54607	7.64945	7.74893	7.13611	6.54039	7.9991	7.06982	7.59388	6.24936	7.82213	5.88865	8.35115	8.09903	7.87608	8.28984	7.69463	7.10694	6.72271	6.1946	7.63042	8.41043
ENSG00000001036	FUCA2	protein_coding	5.7701	6.03378	5.72392	5.62661	5.20941	5.9056	5.7498	5.32031	6.00526	6.0324	5.64008	5.71459	5.97529	6.21773	5.49299	5.80878	5.60749	6.07496	5.48102	5.48599	5.94288	5.514	5.57949	5.62316	5.67544	6.09605	5.51409	5.63963	6.04702	5.68561	5.41841	5.5525	5.62308	5.82625	5.6125
ENSG00000001084	GCLC	protein_coding	5.81345	5.38867	5.1506	4.4333	5.43075	5.59118	5.73912	5.35045	5.45153	5.86575	5.26419	7.02653	5.93336	4.95904	5.5932	5.82351	5.24555	7.82336	5.92648	5.36561	6.6263	6.39375	4.58717	7.19951	4.60831	5.17487	5.60345	6.29506	5.98927	5.83285	6.65359	4.6725	4.36132	3.84212	5.55518
ENSG00000001167	NFYA	protein_coding	5.13699	4.39737	4.52933	4.21539	4.78326	4.61624	4.24896	4.61727	4.69939	5.02119	4.80085	5.0281	5.12139	4.87954	4.25184	4.75501	4.39619	5.47164	4.54824	4.42392	5.23186	4.3494	4.97337	5.14697	4.43378	4.54959	4.83517	4.82618	4.52919	5.15636	4.31393	5.4712	5.10266	4.02467	4.53598
ENSG00000001460	STPG1	protein_coding	2.79902	3.72383	2.86779	2.32431	2.49105	2.36599	3.24647	2.49326	3.47604	2.84784	3.68457	3.31695	2.40508	2.5377	2.96268	3.24114	2.54467	2.46723	2.93621	2.13978	3.34556	1.9059	1.9977	2.2226	3.57793	2.69998	2.88146	3.19302	3.1945	3.10886	3.0866	1.66081	3.32421	3.72036	2.884
ENSG00000001461	NIPAL3	protein_coding	4.67312	5.28592	4.7379	4.82413	4.72631	4.63697	5.49638	4.68191	4.92858	5.39656	5.1336	4.64483	4.47569	5.31972	4.91604	4.47716	4.41789	4.46365	4.73638	4.51116	4.37021	4.58783	4.11871	4.41491	4.83308	4.70939	4.92791	5.09344	5.06725	4.11819	4.69457	4.55114	5.13039	4.42186	4.98359
ENSG00000001497	LAS1L	protein_coding	4.69453	4.93401	4.67812	4.59196	4.2268	4.17477	4.22796	4.15142	4.7556	4.56509	4.76787	4.57501	5.42922	4.58971	4.36874	4.34272	4.43714	5.72974	4.37087	4.36554	4.8076	4.37262	3.88414	5.37734	5.67464	4.29967	4.8889	4.48316	4.61236	5.1701	4.46891	5.01381	4.75746	5.17923	5.36053
ENSG00000001561	ENPP4	protein_coding	5.67929	4.32638	5.36735	4.40842	5.52417	4.46213	5.92671	4.56683	5.14279	5.69808	4.96579	5.64814	5.5846	6.07697	5.41555	5.2466	4.14354	6.01384	6.24341	5.14533	5.6805	5.18428	4.48947	5.73651	4.49313	5.56107	4.93978	5.52714	5.7335	5.3475	5.45355	4.28164	3.28337	2.83178	5.35862
ENSG00000001617	SEMA3F	protein_coding	5.13272	5.28304	4.84051	4.42174	4.37333	3.89393	4.91284	3.91768	6.26183	4.89832	5.26985	5.3964	6.03846	6.31481	4.45251	4.73264	4.27301	6.12984	5.79056	5.27107	4.67755	3.11812	5.76643	5.64796	6.00151	4.60883	4.61945	4.63753	5.18523	5.74191	4.29684	6.79019	4.82579	5.35431	5.14769
ENSG00000001626	CFTR	protein_coding	2.25549	1.45629	-0.957661	-0.994177	-4.08843	-4.08843	2.21327	-1.17737	1.16227	1.96782	1.52638	-1.29907	-0.685024	2.82455	0.737048	-1.28504	0.11096	-0.875415	-0.920557	3.36964	0.363205	0.956996	0.220903	0.00706981	-2.79722	-0.941243	1.07637	-0.133428	2.21284	0.76327	0.607281	-0.238828	-1.16526	-1.5189	2.37963
ENSG00000001629	ANKIB1	protein_coding	6.24535	5.98851	5.74937	5.94128	5.93976	6.04397	6.08753	5.98856	5.22915	6.24836	5.73116	6.31264	6.27508	6.12763	6.01319	6.16936	5.72443	6.33822	6.25389	5.903	6.19814	5.96722	6.13082	6.03262	5.30922	6.36425	5.81101	6.50084	6.22568	5.50437	6.06464	5.93658	5.75762	4.63529	5.65521
ENSG00000001630	CYP51A1	protein_coding	6.39553	5.10526	5.59797	6.58932	5.85677	5.2427	5.59897	4.93309	5.31271	5.65724	5.58964	6.58231	7.70393	6.53392	5.47496	5.505	5.34745	7.70267	5.13028	6.23779	6.21175	5.14333	5.00906	7.03668	6.43982	5.73305	5.31401	5.77974	5.67708	6.0528	5.17579	5.18607	5.05773	4.68496	5.1773
ENSG00000001631	KRIT1	protein_coding	5.29825	4.63735	5.0412	4.96045	4.90217	4.79289	5.18995	4.9234	4.56952	5.09616	5.07658	5.16997	5.33372	5.18269	5.05905	5.15121	4.65381	5.63938	5.23133	4.87781	5.44335	4.6723	5.1586	5.23846	4.71965	5.00365	5.17959	5.30214	5.22626	5.05778	5.26201	4.78802	4.92104	4.1187	5.53415
ENSG00000002016	RAD52	protein_coding	2.11242	2.70463	2.73819	2.55943	2.32134	2.56455	2.63085	2.53203	1.7592	2.432	2.85586	2.28998	0.607042	1.40537	2.6775	2.27888	2.49653	1.5737	2.44479	1.6461	1.98034	1.69539	2.70636	0.771361	1.14675	1.78122	2.71297	2.4776	2.60036	2.31453	2.73959	3.1124	3.65987	2.55934	2.32581
ENSG00000002330	BAD	protein_coding	4.46462	5.49831	3.97089	4.02994	3.97106	4.28207	4.52814	4.2203	5.79335	4.45546	4.95645	4.54095	4.0932	4.13637	4.41675	4.77367	4.71468	4.47946	4.55334	3.92901	4.79702	3.76472	4.34855	4.08725	5.10207	4.45399	4.87185	4.41824	4.52555	5.07834	4.24874	4.59376	4.87526	5.7173	4.87936
ENSG00000002549	LAP3	protein_coding	7.01539	7.12971	7.22309	6.43939	6.27758	6.8342	6.83946	6.47244	7.34101	7.21041	6.34942	7.79467	7.88016	8.15411	6.23025	6.71671	6.35712	8.55661	7.14292	6.92269	7.19515	6.93989	6.42066	7.52766	7.86019	6.83434	6.22168	6.54154	7.74491	7.47306	6.38694	6.08059	7.16448	6.43564	7.06255
ENSG00000002586	CD99	protein_coding	7.82847	8.73747	7.43969	6.45121	7.49872	8.20176	7.25315	7.55136	8.79649	7.72581	7.76113	7.35623	8.27819	7.73383	7.41228	7.98882	8.20246	7.90246	7.75311	7.76506	7.8494	7.47844	6.95828	7.69488	6.93149	8.26873	7.55262	7.78181	7.50274	8.09121	7.37299	6.49979	6.09418	8.44268	7.96923
ENSG00000002587	HS3ST1	protein_coding	4.21812	2.54063	2.22554	1.53136	2.04059	2.84467	2.87849	2.17182	2.26869	4.86546	4.03653	2.53463	4.09796	3.17558	2.8965	2.37978	1.9352	1.20663	2.06143	1.52938	1.64502	1.87622	1.54179	4.06638	3.00503	1.94164	5.17882	2.34416	3.11421	3.20813	2.52141	2.0069	1.68711	1.48504	3.05914
ENSG00000002726	AOC1	protein_coding	-2.96421	-2.51018	4.08434	2.76678	-0.299274	-0.887576	-4.08843	0.0780028	0.57777	-1.70734	-0.964959	-0.701454	-3.11898	-0.192916	-2.332	-1.52934	-0.07051	-1.72766	-0.84704	1.58892	-1.09558	0.327012	-0.328127	-3.48513	3.51847	-1.303	-0.989703	-3.44871	-1.19173	-1.92356	-1.92233	5.23746	0.261324	1.2896	-1.71883
ENSG00000002745	WNT16	protein_coding	-1.302	-1.28972	-2.53274	-0.859167	-0.125566	-1.56625	-3.48508	0.76087	-0.536091	-1.8843	-1.37214	-2.96235	-0.444895	-2.94625	-2.71786	-3.46203	0.193796	-3.06403	-2.81969	-1.04549	-2.83016	-0.817149	-0.37337	-1.04077	-4.08843	-1.2037	-1.16629	-4.08843	-4.08843	-1.45004	-4.08843	-4.08843	-1.75953	-0.264369	-4.08843
ENSG00000002746	HECW1	protein_coding	-1.90589	0.383064	-1.54015	0.793471	1.55793	-1.0297	-2.04739	-1.55671	-4.08843	-1.8843	0.313764	-1.42807	-2.13449	-1.703	-2.17194	-1.66898	1.07115	-3.06403	-1.46358	-0.796613	-2.83016	-0.282875	1.03619	-1.23437	-0.00772021	-1.64991	-0.989703	-1.49813	-3.50738	-2.12365	-1.77044	1.26759	-0.745593	2.29128	-0.939027
ENSG00000002822	MAD1L1	protein_coding	3.66466	4.49272	3.29397	4.20194	3.25508	4.16868	3.27404	3.55008	4.09523	3.62348	3.9498	3.79633	3.75697	3.77808	3.33335	3.60551	4.05491	4.06307	3.66769	3.59329	3.61974	3.72364	3.71072	3.60589	4.18209	3.64097	3.62742	3.50373	3.70721	3.92422	3.41051	4.09596	4.21362	4.92893	3.6963
ENSG00000002834	LASP1	protein_coding	7.38219	8.36833	7.27047	7.12062	7.19827	8.04841	7.52898	7.63276	8.35624	7.73158	7.83479	7.89289	7.53634	7.52042	7.46233	7.73634	7.37224	7.44325	7.82076	7.09879	8.05803	7.052	6.98932	7.33221	8.07387	7.8727	7.45312	7.56177	7.44212	7.44902	7.34882	7.62292	7.38914	7.3103	7.44737
ENSG00000002919	SNX11	protein_coding	4.03187	4.34307	3.71939	3.72873	4.21271	4.61325	3.8454	4.27275	5.00787	4.35438	3.9213	4.96848	5.07634	4.14796	4.04335	4.44365	4.20973	5.52404	4.66592	4.09736	4.97649	4.33128	3.82529	5.11937	4.62167	4.40174	4.1873	4.35258	4.59854	4.84637	4.44194	4.32054	3.97603	4.28062	4.50345
ENSG00000002933	TMEM176A	protein_coding	5.99306	6.3599	5.73554	4.44802	5.07679	5.94354	6.52395	5.44912	7.25479	6.77616	6.2252	5.14326	5.72947	6.67535	5.78161	5.68428	5.93548	4.65681	6.00861	5.8927	6.02856	6.11644	4.93212	5.20661	5.19435	5.83217	5.88841	6.14598	6.56959	6.41212	5.29036	5.9236	3.89701	6.24459	5.61971
ENSG00000003056	M6PR	protein_coding	6.30605	6.55523	6.48586	6.73418	6.48188	7.46747	6.62957	6.36336	6.86323	6.70119	6.24786	6.64329	7.07505	6.90412	6.26389	6.35656	6.10492	7.25341	6.55487	6.5074	6.59428	6.8641	6.74727	6.72743	7.25636	6.8629	6.38616	6.38387	6.72993	6.9132	6.33711	6.79198	6.83283	6.58507	6.5971
ENSG00000003096	KLHL13	protein_coding	1.87392	3.19003	2.71332	1.122	1.95612	3.33254	2.27825	3.43887	2.06626	2.37416	3.62984	3.4048	3.35001	3.10594	3.04238	3.21655	2.67293	1.5737	2.54378	2.82431	2.98455	2.36361	3.43046	1.96508	-1.22613	3.34964	3.08258	3.03456	3.02917	3.03868	3.37429	2.05531	0.6651	-0.507173	2.2286
ENSG00000003137	CYP26B1	protein_coding	4.67899	5.55792	2.36778	1.97262	3.79852	3.11337	4.75708	3.27332	4.7799	4.44613	4.38509	5.14326	7.05258	6.66983	5.41712	5.45857	3.05725	5.82254	4.1075	2.98807	5.81869	1.97288	1.58973	5.11048	1.16511	4.36784	4.40179	5.24713	4.51822	5.4847	4.74429	1.38589	0.0969971	1.06347	4.59567
ENSG00000003147	ICA1	protein_coding	3.99783	4.28378	4.32905	4.3258	3.77679	2.66601	4.8501	3.79554	5.64251	4.00009	4.39203	4.58966	3.70807	4.49754	4.5447	3.81002	3.13791	5.48345	4.50852	4.37825	5.02986	3.27042	3.10308	3.76333	3.60508	3.86906	3.88138	4.50208	4.43317	5.33535	4.40651	4.21128	4.79147	4.54452	4.93819
ENSG00000003249	DBNDD1	protein_coding	1.42991	0.82465	1.55481	2.8578	2.09427	-1.4618	0.211152	0.865763	2.3682	0.450676	1.44861	0.227889	0.245139	0.167614	0.0531848	0.809611	0.484458	-0.136328	1.12792	0.280056	0.218509	0.172767	2.5455	0.636244	4.6382	-0.0680766	1.29679	-0.241174	0.222326	1.48011	0.430428	4.63715	3.85689	3.87736	2.09708
ENSG00000003393	ALS2	protein_coding	4.49821	4.55376	4.46933	5.0098	4.52112	4.50142	4.58613	4.24773	4.56603	4.81743	4.78115	4.72855	5.34975	4.77872	4.65156	4.71694	4.33591	5.26594	4.57021	4.39085	4.7027	4.19165	4.70884	4.99233	4.34195	4.7656	4.63188	4.94924	4.62946	4.61474	4.72844	4.41632	5.20462	3.85182	4.64987
ENSG00000003400	CASP10	protein_coding	4.25789	4.71849	4.53467	5.84258	3.86952	4.66464	4.36463	4.64848	5.04843	4.33934	4.38682	5.11315	4.03986	5.32484	4.43862	4.60582	4.11991	4.41925	4.54141	4.11519	4.15846	3.99622	3.48534	4.36022	4.47852	4.95345	3.77126	4.33393	4.6861	3.87136	4.52688	3.87271	5.46137	3.69903	3.9047
ENSG00000003402	CFLAR	protein_coding	7.93105	7.54309	7.70272	6.88155	7.40558	7.1271	7.21987	6.97476	8.11555	8.06666	7.94819	8.04342	8.74616	7.99989	7.31998	7.99027	7.26528	9.15717	8.2847	7.81052	8.24689	7.44661	6.0819	9.02652	5.92614	7.62132	7.48773	8.45917	7.63071	8.37683	7.89977	6.00057	7.21965	5.93212	7.92061
ENSG00000003436	TFPI	protein_coding	7.3656	5.89914	7.61795	4.86615	6.68689	6.29426	6.69818	5.83941	6.68654	7.55247	6.56247	6.8054	8.04058	7.69607	7.0414	7.35464	6.12616	6.64292	7.35905	6.72787	6.50025	5.69634	4.46076	7.25129	3.31973	6.61942	6.0919	7.73037	7.16279	6.65822	6.47556	2.42589	2.76342	3.25849	6.41716
ENSG00000003509	NDUFAF7	protein_coding	3.32356	3.23843	3.29397	3.29063	3.68355	3.25803	3.32327	3.21097	3.68346	2.9371	3.04389	2.99085	3.59158	3.37624	3.28243	3.02025	3.46	4.23593	2.88858	3.26401	3.22448	2.95258	3.81272	3.42093	3.08435	3.34144	3.23259	3.25877	3.40767	3.88142	3.34131	3.89117	3.56081	3.68825	3.66568
ENSG00000003756	RBM5	protein_coding	6.27473	6.43903	6.0349	5.84444	6.12688	6.43027	6.15397	6.4131	6.61067	6.19576	6.83149	6.37741	6.56238	6.15447	6.41219	6.49949	6.58856	6.83107	6.30215	6.14785	6.5659	6.19268	5.89719	6.92262	5.00984	6.42611	6.66989	6.72854	6.211	6.71464	6.59097	6.08461	5.91193	6.62332	6.69663
ENSG00000003987	MTMR7	protein_coding	1.41122	0.0984336	-0.605103	2.30288	0.065742	-0.956888	2.4653	-0.417238	0.125769	1.12413	1.71534	-0.342351	-0.146242	2.58112	0.796327	-1.40202	-1.53121	-0.875415	-2.34462	-1.58881	-1.71651	-0.328231	0.832108	0.718822	0.220111	-0.468114	1.58415	-0.241174	2.41564	0.978507	1.49172	-0.719258	0.703711	-2.1845	1.69775
ENSG00000003989	SLC7A2	protein_coding	7.67829	5.24801	7.13717	7.64285	6.21635	6.12744	7.70981	5.21207	6.71201	7.29922	6.83722	6.5192	8.17907	9.70469	6.96542	6.08017	7.27572	8.82916	6.59169	7.21318	6.51064	5.52201	2.85597	8.60987	5.98352	6.85032	7.2693	7.12654	7.45224	8.1168	6.4356	3.34925	6.80313	4.99751	7.66095
ENSG00000004059	ARF5	protein_coding	5.81966	6.85302	5.84477	6.20812	5.57933	5.89703	5.80912	5.67882	6.72537	5.83034	5.88362	5.81242	5.97658	6.19556	5.55866	5.87076	6.0935	6.2637	5.55153	5.91104	6.05899	5.80339	6.2821	5.81994	5.99383	5.95342	5.86322	5.84047	5.62092	6.37166	5.52871	6.16195	6.62379	7.16424	6.24661
ENSG00000004139	SARM1	protein_coding	4.11795	4.93401	4.02999	3.91688	3.93718	4.29144	4.66635	4.19234	4.34772	4.48537	4.79169	3.82138	4.01495	4.52448	4.52877	3.73236	4.51371	3.21703	3.50524	4.02645	3.05726	3.87639	4.09399	3.44135	3.50772	4.09062	4.71071	3.85393	4.48668	3.45713	3.9179	3.68354	3.5127	4.39115	4.56282
ENSG00000004142	POLDIP2	protein_coding	5.73483	6.48927	5.86043	5.61289	5.35121	5.43252	5.9939	5.29705	6.50168	5.74353	5.83096	6.03447	6.23033	5.8113	5.76192	5.81206	5.42236	7.02131	5.81766	5.50544	6.37569	5.27048	5.73012	6.12321	5.96726	5.65831	6.05377	5.87151	6.19788	6.75395	5.94626	5.77162	6.00327	6.02647	6.89612
ENSG00000004399	PLXND1	protein_coding	7.43576	8.45456	7.32715	6.38601	6.69705	7.88703	7.5285	6.96682	7.76203	7.92403	8.08807	7.82064	7.6312	8.00029	7.61984	7.77074	7.38028	7.17668	8.17358	7.22026	7.64664	7.13345	6.50628	6.94388	7.09992	8.14262	7.8225	8.06075	7.7933	7.19581	7.50657	7.03333	5.69131	5.67605	7.33193
ENSG00000004455	AK2	protein_coding	6.18612	6.45896	6.70233	6.70144	5.92132	5.96712	6.28849	5.83101	6.84175	6.10532	6.00405	6.73512	7.10251	6.45443	6.20632	6.05612	5.95787	7.91269	6.16061	6.23021	6.47724	6.01964	5.88824	6.89736	7.47335	6.13332	6.28101	5.90665	6.59025	7.07755	6.08719	6.13475	7.40881	6.85794	6.85837
ENSG00000004468	CD38	protein_coding	3.87022	2.6873	3.54009	3.287	2.64288	3.79463	3.43334	4.27465	2.70915	4.63448	2.83053	3.71083	5.26565	4.43266	2.30819	3.14538	3.63696	7.07758	3.69564	3.66767	4.41518	3.57142	3.20663	3.9228	3.31151	3.82565	2.35772	2.83014	4.14302	5.00355	3.00472	1.06969	3.45728	2.33803	2.69678
ENSG00000004478	FKBP4	protein_coding	5.24647	5.67133	6.77886	6.97883	5.32806	5.15507	4.96453	5.148	6.31164	5.46743	5.73595	5.18107	6.51253	5.68267	5.459	5.10104	5.09609	6.51355	5.51801	5.02249	5.88911	5.05115	7.19944	6.32562	7.98171	5.10275	5.7763	4.85917	5.69667	6.38586	5.06401	7.95681	7.61405	6.93978	5.5333
ENSG00000004487	KDM1A	protein_coding	5.50957	6.02	5.96749	6.24043	6.02344	5.30602	5.70323	5.49971	5.76625	5.55247	5.73731	5.29403	6.16502	5.66462	5.45747	5.18075	5.4105	5.96413	5.25656	5.67215	5.22557	5.25038	6.6185	5.74721	7.19904	5.62578	5.51164	5.56062	5.60026	5.88128	5.33397	6.13228	6.92175	6.58507	5.91939
ENSG00000004534	RBM6	protein_coding	6.61659	6.15298	5.81293	5.34918	5.649	6.05447	5.81461	5.84712	6.3158	6.53681	6.88537	6.29486	6.67481	5.91335	5.79621	6.19791	6.29339	6.79756	5.8731	5.86888	6.19573	5.54263	5.85307	6.21142	4.30102	5.70537	6.31645	6.01234	5.75469	6.64597	5.86231	5.51079	5.32018	5.85707	6.2461
ENSG00000004660	CAMKK1	protein_coding	2.80619	3.57631	2.91218	2.37997	3.25115	3.67944	2.2873	2.34147	3.31078	3.69217	3.55759	2.51721	3.81586	3.08196	3.77277	3.53566	3.87834	2.38567	3.31016	3.28216	2.06742	3.30796	2.58151	3.82987	2.8491	3.71897	4.1295	3.20333	2.43909	3.18665	3.20589	3.33951	2.41931	2.96284	2.80752
ENSG00000004700	RECQL	protein_coding	6.20997	5.69212	6.08423	5.73864	6.0565	6.21228	5.81539	5.76474	5.43441	6.21374	5.56912	5.95828	6.41877	6.28229	5.7526	5.96161	5.71043	6.15959	5.86423	6.03128	5.97982	5.85883	5.96862	6.21735	5.63814	6.37432	5.5633	5.96766	5.98993	5.75929	5.70998	5.55618	5.39065	4.56432	5.87859
ENSG00000004766	CCDC132	protein_coding	3.89733	3.64972	3.80132	4.40171	3.75474	4.47535	4.30573	4.07253	3.78898	4.07159	4.16366	4.17232	3.78672	3.7706	4.14187	4.19446	3.82736	4.23127	4.06051	3.47597	4.52437	3.91095	4.17085	3.72055	3.40718	4.33105	4.2116	4.32451	4.41751	4.01535	4.27735	4.06674	3.98193	3.07748	4.20861
ENSG00000004776	HSPB6	protein_coding	7.90561	9.26749	8.15747	5.25278	7.24426	6.71775	7.53017	7.29895	10.5297	7.66329	8.41968	8.97792	8.91356	7.33058	8.33895	9.17257	6.7008	9.43961	9.07425	7.59851	9.29773	6.16123	5.29588	9.33066	2.54701	8.01364	8.80614	8.72459	8.48383	9.76418	8.80629	3.1519	4.6039	6.65043	9.04523
ENSG00000004777	ARHGAP33	protein_coding	3.39188	4.11907	3.26003	2.66403	2.67847	2.31544	2.9314	2.59441	3.75874	2.5928	3.67322	2.37944	2.04051	2.40868	2.7087	2.58583	3.59567	1.93648	2.45209	1.7011	2.14954	2.8081	2.65094	2.23201	2.67425	2.3861	2.98728	2.93906	1.68138	2.76931	2.91792	2.67858	3.95017	3.38854	2.50946
ENSG00000004779	NDUFAB1	protein_coding	5.06259	5.3752	4.78043	4.91643	4.61746	4.79025	4.95178	4.63222	6.1072	4.87591	4.80085	5.26302	5.91866	4.95904	4.92824	5.23318	5.10682	6.76002	5.04596	4.90442	6.03578	4.73428	5.26761	5.56017	5.60825	5.0746	5.04663	5.07951	5.50808	5.94741	5.26311	5.21633	5.55937	5.68692	6.08302
ENSG00000004799	PDK4	protein_coding	9.87801	9.34801	9.44582	6.57896	9.94442	8.12247	10.7993	8.31209	10.0665	11.0141	11.05	8.40147	9.47096	9.53657	9.97722	8.32463	8.08818	9.77814	10.9497	9.1012	8.60655	8.77743	7.75495	10.0301	5.00092	9.57274	11.3196	11.3336	11.2967	10.3112	11.6533	5.35453	6.99898	5.41879	11.7152
ENSG00000004809	SLC22A16	protein_coding	-2.61867	0.792597	-1.95271	-0.516601	-0.167072	-1.0297	-2.04739	-2.88407	-0.950129	-1.70734	-2.89573	-2.61648	-0.973262	-1.40313	-2.95796	0.113099	-3.46283	-1.2395	-0.128204	0.0451648	-3.32625	-2.24183	-1.6025	0.487153	-2.53764	-1.2037	-1.98751	-1.14426	-1.92765	-2.63314	-3.09089	-3.42549	-2.4126	-2.68495	-2.35918
ENSG00000004838	ZMYND10	protein_coding	-0.70456	-0.19095	-1.12697	-1.06674	-0.299274	-1.4618	-1.72276	0.865763	0.401073	-1.15966	-0.295779	-1.29907	-1.81569	-1.40313	-1.21207	-1.82361	-0.223361	-1.046	-2.34462	-2.47064	-1.92486	-0.423459	1.77737	-2.04748	0.148092	-1.52477	-1.51924	-1.25285	-0.851023	-0.366523	-0.392529	0.740169	1.50233	4.53653	-0.489748
ENSG00000004846	ABCB5	protein_coding	1.35366	0.975034	0.89119	0.911489	0.202394	3.85148	1.90769	1.14122	1.3686	2.46008	3.4081	1.14661	2.37407	2.27758	2.87832	-0.221255	0.516995	-0.236091	1.07216	0.513076	0.494702	0.73243	0.309457	1.54976	-3.52046	2.00528	1.49787	2.2774	1.55825	2.10155	3.03081	-0.938744	-0.910756	-2.41314	0.637916
ENSG00000004864	SLC25A13	protein_coding	3.85301	3.83816	4.79531	5.65932	4.31611	4.12532	4.09771	3.61472	4.16608	4.09267	4.03874	3.7891	4.59816	4.76372	4.10327	3.91463	3.74048	5.67071	4.1075	4.12528	3.97918	3.95185	5.23689	4.91563	4.22867	4.24579	3.90578	3.93352	4.26617	4.20353	3.9179	5.14612	5.31161	4.32539	4.06816
ENSG00000004866	ST7	protein_coding	4.37824	4.68177	3.88443	4.13881	3.72668	4.20484	4.08997	3.79554	5.16832	4.36431	4.77187	4.8005	4.82436	4.33712	4.11496	4.80535	4.22704	4.92853	4.51377	4.08965	5.02624	3.66118	4.24757	4.93447	4.43757	4.38787	4.75271	4.48104	4.37152	5.20924	4.47272	3.89117	3.86968	4.55643	4.95349
ENSG00000004897	CDC27	protein_coding	6.44288	5.88116	6.38514	5.44036	6.17698	6.06707	6.19542	5.90056	5.96344	6.29327	5.96501	6.79008	7.42443	6.72845	6.01994	6.52475	5.85743	7.6092	6.26688	6.20486	7.01337	5.80929	5.36725	7.19891	6.31536	6.57554	5.87848	6.48455	6.33236	6.4666	6.19032	5.0679	5.64494	4.78282	6.00506
ENSG00000004939	SLC4A1	protein_coding	-1.302	-1.98071	0.79965	-3.58366	-2.21921	-4.08843	-1.87596	-1.79182	-4.08843	-1.54974	-1.68625	0.227889	1.31068	-2.31684	-1.66599	1.62999	-3.46283	-4.08843	0.580113	-2.73692	-1.22758	-1.02548	-2.66974	1.82297	-4.08843	0.378965	-2.51607	1.68162	0.109899	-4.08843	0.634759	-3.71921	-4.08843	-3.02016	-1.71883
ENSG00000004948	CALCR	protein_coding	-1.43096	-2.22129	-3.51803	-1.49705	-1.53643	-1.4618	-1.04066	-1.79182	-0.798526	0.0189123	-0.0883362	-1.42807	-3.11898	0.56365	-1.56306	-1.28504	-2.4233	-3.06403	-0.470654	-1.58881	-1.37289	-1.79719	-1.6025	-2.46701	-2.12693	0.378965	-0.603197	-0.697978	-0.575604	-2.12365	-1.1858	-2.11886	-2.2562	-1.5189	-1.01636
ENSG00000004961	HCCS	protein_coding	3.76742	3.64075	3.67822	4.24941	3.49351	3.97526	3.80186	3.62671	4.36388	3.78017	3.20235	4.27433	4.81284	4.32695	3.7703	3.98911	3.36936	5.32183	4.15524	3.98272	4.6187	3.51475	4.41492	4.98818	4.46376	3.91673	3.86615	3.94585	4.11174	4.73612	3.94559	3.52283	3.44023	3.5679	4.37873
ENSG00000004975	DVL2	protein_coding	4.56526	5.56387	5.63981	4.32225	4.71636	4.88366	4.7845	4.78448	4.74639	4.69283	5.11274	4.59174	4.46469	4.24564	4.8359	4.79542	5.07576	4.44766	4.58522	4.29578	4.64016	4.36907	6.81595	4.30782	4.64639	4.71574	4.92975	4.79413	4.65806	4.64261	4.61919	4.4831	4.49803	5.19582	4.97112
ENSG00000005001	PRSS22	protein_coding	-4.08843	-2.87179	1.94492	-0.925093	1.78167	-1.67886	-4.08843	-2.23696	-1.11955	-4.08843	-3.57383	-2.96235	-2.54434	-3.40714	-2.95796	-3.46203	-1.53121	-4.08843	-2.15523	0.766171	-1.09558	-1.02548	0.0600453	-3.48513	0.744421	-2.52049	-4.08843	-4.08843	-4.08843	-3.42786	-3.09089	3.27454	0.882639	1.81087	-3.53939
ENSG00000005007	UPF1	protein_coding	6.15557	5.99645	5.94029	6.09574	6.12204	6.00805	5.7604	6.02865	6.56858	5.76619	6.09566	6.35369	7.05442	6.19346	5.82733	5.90194	6.03362	7.49376	6.53266	6.17967	6.43897	5.64225	6.11248	7.03869	6.7963	5.89442	6.44658	6.19783	6.07973	6.70192	6.07219	6.67267	6.4434	6.1482	6.9313
ENSG00000005020	SKAP2	protein_coding	6.59657	5.96803	6.28375	5.50045	6.2254	6.63367	6.79137	6.15924	5.79782	7.01647	6.20268	6.88648	6.96098	6.93415	6.48644	6.6924	5.84066	6.99885	6.77313	6.33119	6.78245	6.31204	5.06525	6.76111	4.46561	6.94735	6.03687	6.97453	6.87387	6.42593	6.5711	5.31345	3.63011	4.73647	6.01177
ENSG00000005022	SLC25A5	protein_coding	7.31466	7.35321	7.05358	8.2057	6.64216	7.10149	7.12746	6.66932	7.55939	7.20074	6.62971	7.16121	7.97912	7.36235	6.68542	6.59464	6.60993	8.55754	6.68177	7.29675	7.53075	7.10628	6.28665	7.81765	8.27324	6.93003	6.68244	6.74892	7.27594	7.93194	6.82328	8.13806	7.53612	7.26051	7.96105
ENSG00000005059	CCDC109B	protein_coding	4.97145	4.91924	4.30428	4.45452	4.65367	5.13022	4.99936	4.46866	4.82438	5.15888	4.68127	4.75107	5.87086	5.31201	4.13231	4.86036	4.90802	4.52969	3.44432	4.70526	4.12502	5.02094	4.19624	5.17161	5.13853	4.63757	4.16725	4.48528	4.46969	4.69298	4.50844	3.1351	3.55291	4.54253	4.32291
ENSG00000005073	HOXA11	protein_coding	-3.41948	-1.1586	-3.11033	-3.21046	-2.61912	-0.697628	-0.717387	0.418672	-1.53309	-2.60095	-1.46944	-1.56974	-2.13449	-4.08843	-1.29214	-3.02671	-0.335072	-4.08843	-2.15523	-1.58881	-3.32625	-2.07792	-3.2113	-2.73365	-3.52046	-1.78695	0.878116	-2.66939	-1.39794	-2.63314	-2.50674	-0.564931	-2.58804	0.768132	-2.83182
ENSG00000005075	POLR2J	protein_coding	4.22348	5.13592	3.75028	5.11401	3.85922	4.142	4.08997	3.85536	5.22251	4.10754	4.80475	4.04444	4.23371	4.25103	4.02282	3.99201	4.37859	5.15955	4.32588	4.02914	4.7561	3.72918	4.75949	4.15555	3.77908	4.12922	4.686	4.35026	4.30923	5.10863	4.2708	4.84249	5.07532	5.44679	5.0668
ENSG00000005100	DHX33	protein_coding	4.46462	4.09955	4.89544	3.96999	4.67732	3.9013	4.50893	3.83483	3.75874	4.42255	4.33012	4.1751	6.61141	5.16139	4.23765	4.17927	4.15651	6.16815	4.04611	4.83542	4.23255	3.87639	5.57279	6.26336	4.43568	3.94405	4.18116	4.19872	4.50902	5.26409	3.94284	4.28037	4.2822	3.52005	4.80122
ENSG00000005102	MEOX1	protein_coding	4.15212	4.45993	4.11789	3.96999	4.11003	2.49488	3.51265	3.87559	5.98058	3.87707	3.95216	5.25122	5.14684	4.9071	3.89079	4.9615	3.41755	4.31736	4.99439	4.23418	4.35009	2.67076	2.76495	4.71062	3.47129	4.45968	3.45242	3.5162	3.59683	4.91327	3.54692	4.26373	3.62509	1.6122	3.74105
ENSG00000005108	THSD7A	protein_coding	4.98573	3.39072	4.93092	3.30508	4.0479	3.62415	4.24664	4.09212	3.85908	4.76962	4.19575	4.61444	5.38712	5.26752	3.99568	4.36974	4.21965	4.61089	4.56348	4.37191	4.2008	3.51475	3.11131	4.07946	0.694731	4.4989	4.107	4.71706	3.87999	3.51858	3.9123	1.47756	5.0744	0.683779	3.333
ENSG00000005156	LIG3	protein_coding	3.55826	3.95861	4.12262	3.62601	4.05468	3.61522	3.57679	3.55323	2.92061	3.59423	3.6269	3.64821	4.23803	3.78181	3.54977	3.2891	3.39146	4.46762	3.21467	3.62208	3.22448	3.30425	4.64362	4.12812	4.71342	3.86335	3.73401	3.43975	3.85405	3.646	3.35376	4.02024	4.74015	3.4018	4.20435
ENSG00000005175	RPAP3	protein_coding	3.83208	3.61349	4.00203	4.97859	4.24075	4.21472	3.80816	3.8881	3.11459	3.85961	3.62984	3.72985	4.75082	4.11289	3.69442	3.77677	3.79787	4.63932	3.75882	4.23883	3.90625	3.91583	4.47519	4.4415	5.03502	4.24139	3.82541	3.7452	4.17131	4.1323	3.67155	4.3193	4.48285	3.88368	3.66568
ENSG00000005187	ACSM3	protein_coding	1.77507	1.35018	1.54075	2.58925	1.90696	0.588801	1.98759	1.7576	0.831303	2.2185	1.73731	0.535261	-0.146242	1.17541	1.25652	0.58212	2.00568	-0.459051	0.380324	1.85455	-0.330462	1.92536	3.31399	0.455392	4.21331	1.09612	1.42701	1.44139	0.758195	-0.431456	0.264445	1.39532	3.13939	3.49551	2.31795
ENSG00000005189		protein_coding	1.14327	1.75133	1.40757	1.55573	1.13122	0.792595	1.62319	0.963544	1.40029	1.05217	1.21805	1.91768	1.34307	1.3662	1.15449	1.91315	1.79631	2.10903	1.78906	0.816857	2.25223	1.67255	0.812039	2.12504	3.04524	1.48641	1.22699	2.2676	1.43922	2.19055	1.53611	1.86473	1.77132	1.72905	2.05989
ENSG00000005194	CIAPIN1	protein_coding	3.85301	4.57982	4.08676	4.15086	4.48807	4.2877	4.22089	4.05932	5.01812	4.18528	4.10994	3.99497	4.80123	4.37954	4.21067	4.11153	4.19723	5.84255	4.24833	4.30246	4.60905	4.09187	4.53915	4.85606	5.41849	4.36784	4.13109	4.02065	4.30711	5.23953	4.05133	4.43588	5.05306	5.44038	5.03121
ENSG00000005206	SPPL2B	processed_transcript	4.8185	5.97697	4.4431	3.86906	4.35695	4.21865	4.31017	4.30668	5.45153	4.12225	4.72865	4.32775	4.66053	4.34218	4.56615	4.39626	5.18356	4.83022	4.40512	4.49763	4.54728	4.37262	5.07581	4.36236	3.91548	4.57428	4.60577	4.54326	4.39169	4.98345	4.57909	4.64013	5.42428	5.14019	4.97238
ENSG00000005238	FAM214B	protein_coding	3.54546	5.31018	3.41072	3.287	3.91	4.4063	4.01841	3.77952	4.59028	3.97112	4.06287	4.47482	3.79844	4.35474	4.25888	4.31519	3.64065	3.77993	4.17743	3.8612	4.46681	3.51796	4.39145	4.31226	2.55399	4.48594	3.80359	4.30788	3.92499	4.04549	3.79846	3.72341	3.46292	4.41969	4.55615
ENSG00000005243	COPZ2	protein_coding	4.94733	5.93538	4.4431	3.11315	4.45767	4.67613	4.45574	4.73549	6.31891	5.0538	4.86212	4.88608	5.23362	4.24023	4.65957	5.67348	5.7025	5.62168	5.51365	4.6293	5.87107	4.20564	3.51358	5.45869	3.66114	5.42419	4.91872	5.2067	4.67791	5.4869	4.7662	3.29988	2.18013	6.13171	5.26673
ENSG00000005249	PRKAR2B	protein_coding	8.35529	8.20193	7.27367	4.93745	7.45172	5.49631	8.40326	7.60405	8.49823	8.91437	7.62947	9.92083	8.87583	6.54273	8.47556	9.43933	4.76804	10.8355	10.1376	8.36034	10.5259	6.87633	5.55025	10.1694	2.28687	8.26359	8.43839	9.84377	9.54096	9.4181	9.84522	2.83235	2.33573	3.56397	9.52253
ENSG00000005302	MSL3	protein_coding	4.14082	4.49023	4.18273	4.81911	4.24866	4.84727	4.15073	4.76291	4.72777	4.15124	3.98696	4.47708	4.88336	4.79725	4.08159	4.42874	4.40491	5.31744	4.44225	4.47413	4.4507	4.70784	5.30309	5.1395	4.40703	4.83146	3.86998	4.39818	4.33447	4.77261	4.33712	4.20593	4.26939	4.23689	4.45413
ENSG00000005339	CREBBP	protein_coding	7.01616	7.06828	6.53192	5.88227	6.5682	6.42942	6.67337	6.56375	6.09877	6.94543	7.0701	6.69115	6.8819	6.65569	6.72632	6.57349	6.29866	7.0606	6.46255	6.38886	6.54266	6.41197	6.42974	6.83702	6.17802	6.5433	6.96632	7.17843	6.48054	6.22003	6.62047	6.60339	6.24497	5.90287	6.68026
ENSG00000005379	BZRAP1	protein_coding	4.18549	4.2722	4.2339	2.52281	4.21876	3.2232	3.58415	3.83999	4.14285	4.12518	4.45801	3.41893	3.154	3.74028	3.56689	3.30319	4.36971	2.80503	2.52313	3.68823	2.89215	4.21949	5.09566	3.77625	3.14574	2.781	4.35892	3.64662	3.38369	3.63415	3.76776	4.42325	4.54796	5.09328	4.32095
ENSG00000005381	MPO	protein_coding	-2.34011	-1.03841	-1.42524	-2.27558	-0.346178	-0.956888	-2.04739	-1.79182	0.199674	-2.32064	-1.19526	-0.874531	-2.54434	0.255996	-2.02787	-1.07618	-0.733899	-2.47103	-0.710374	-0.651738	-1.92486	-1.1022	-1.22541	-1.58439	-1.67105	-0.205424	-1.88091	-0.697978	-1.51326	-0.431456	-2.28459	-1.14207	-2.7878	0.124975	-1.85427
ENSG00000005436	GCFC2	protein_coding	4.52888	3.63172	3.98135	3.5247	4.17583	3.87162	4.51472	3.59959	4.12873	4.35188	4.20169	4.66868	4.98692	4.03697	4.01036	4.50382	4.14094	5.67071	3.86927	4.05576	4.68215	3.81773	4.22498	4.91125	3.92089	4.33105	4.02369	4.76135	4.1454	4.56567	4.3925	3.1519	4.48701	3.73091	4.67161
ENSG00000005448	WDR54	protein_coding	2.80619	3.04111	2.42251	3.18131	2.96929	1.92064	2.65901	2.48669	3.67052	2.45078	2.60416	1.79299	1.93821	2.91555	2.11217	2.21078	2.96002	1.48248	1.61788	1.85455	1.54742	2.28296	4.06672	1.71981	4.05494	2.0462	2.4268	2.06763	2.09964	2.45588	1.46135	3.67969	3.12168	4.45405	2.25352
ENSG00000005469	CROT	protein_coding	3.96936	3.83816	3.11567	3.79932	3.39356	3.99833	4.23265	3.98908	3.31909	3.83122	3.39433	3.43293	2.91638	4.12761	3.74796	3.69724	3.84349	3.06814	3.25279	3.04765	3.53061	3.64661	3.53822	3.26478	2.29523	4.04593	3.6476	3.36364	4.34071	3.15935	3.58967	2.71294	3.40844	3.30158	3.29749
ENSG00000005471	ABCB4	protein_coding	0.566159	0.294284	-0.806154	-0.418378	0.717672	0.434955	0.172602	0.905674	-0.034473	-1.27834	-0.591913	-0.475468	-0.338326	0.492666	-0.749581	-1.40202	0.0230764	0.127236	0.21852	1.10893	-0.487119	0.0362751	0.365611	0.54865	0.288704	0.559403	-0.106188	-0.0331724	-0.777084	-1.45004	-0.449098	-0.493546	-1.3116	0.431265	-1.37532
ENSG00000005483	KMT2E	protein_coding	7.25564	6.4955	6.63441	6.42912	6.82627	6.68896	6.53016	6.6751	5.71203	6.7226	6.69291	7.02037	7.38997	7.08655	6.68901	6.77598	6.60094	6.80385	6.38839	6.90596	7.14181	6.64214	6.74694	7.46848	5.58372	6.63669	6.33143	6.63402	6.17536	6.4571	6.53738	6.22712	6.25191	5.32211	6.29843
ENSG00000005486	RHBDD2	protein_coding	5.22389	5.71795	5.31769	6.0827	5.02819	4.87496	4.73906	4.36332	6.25968	5.32838	5.11589	5.08239	5.24223	5.28994	4.62046	5.2647	5.25161	5.79911	4.96279	5.29474	5.44606	4.86973	5.60959	5.02651	4.95549	5.21131	4.92516	4.91514	5.21271	5.92975	4.5879	6.26267	5.57181	7.0555	5.66608
ENSG00000005513	SOX8	protein_coding	1.5713	0.886697	1.15399	-1.30927	1.07892	-1.10638	0.172602	0.76087	1.04687	0.752593	-0.0883362	1.45172	3.50834	1.80752	0.610641	1.17895	1.15624	1.48248	-0.00313948	2.03664	0.986856	-0.154782	-0.926733	2.57269	-1.67105	0.614859	0.665908	0.555143	-0.0994549	2.25387	-0.633468	-2.48361	-2.11511	-0.574844	0.711715
ENSG00000005700	IBTK	protein_coding	6.01875	5.56268	5.88847	5.40559	5.91511	6.14977	6.23571	5.91835	5.18661	6.28152	5.65169	6.21611	6.71327	6.50208	6.03232	5.90194	5.63091	6.8608	5.71216	6.11024	6.12475	6.15455	5.55931	6.58564	5.05608	6.43673	5.85939	6.36275	6.3334	5.68082	6.10817	5.21766	5.51052	5.07545	6.11511
ENSG00000005801	ZNF195	protein_coding	3	3.17146	3.1485	3.67412	3.27071	3.2232	3.30556	3.31467	3.57656	3.4846	3.39433	3.43293	4.5224	3.87546	3.09841	3.22644	3.33327	5.20067	2.98735	3.51103	3.40249	3.56213	3.96133	4.62042	3.87422	3.10046	3.38458	3.16163	3.27926	4.41222	3.20589	4.606	3.90532	3.5241	3.49155
ENSG00000005810	MYCBP2	protein_coding	7.48183	6.66221	6.91867	5.79283	6.78402	6.80277	7.40793	7.09399	6.29066	7.6653	6.97997	7.41413	7.6205	7.17067	7.53646	7.53377	6.56249	8.52148	7.86314	7.24736	7.94112	7.02351	6.01105	7.5267	4.97904	7.53073	7.45646	8.06517	7.66199	7.13998	7.65254	6.25524	6.08416	5.19962	7.35275
ENSG00000005812	FBXL3	protein_coding	6.56204	5.65248	6.82275	5.5384	6.93999	6.55455	6.61257	6.38072	5.48147	6.60441	6.02318	6.64829	7.04583	6.49756	6.53401	6.46075	6.45272	7.15531	6.3227	6.5567	6.33678	6.33222	5.23783	7.04304	5.51828	6.47047	6.19451	7.02518	6.46396	6.39934	6.44727	5.17174	4.99002	4.91512	6.69512
ENSG00000005844	ITGAL	protein_coding	4.60486	4.17609	3.09175	4.38821	3.52969	6.45716	3.41695	5.87691	4.64421	4.06246	3.52638	4.88947	3.38932	4.76561	3.34333	3.30319	5.28741	3.79264	4.33578	4.39085	3.04301	5.95898	4.04324	3.99913	3.43392	5.15513	3.19652	4.2013	3.90267	4.27141	4.38847	2.91338	4.39267	4.37106	2.77919
ENSG00000005882	PDK2	protein_coding	5.16793	6.58068	4.35138	4.3399	5.28157	4.53179	5.96599	5.3693	6.49252	5.09168	5.81167	6.20527	5.08833	4.72554	5.84499	5.66532	4.4749	6.5617	5.37747	4.86582	6.68599	4.46192	5.01016	5.73981	4.34195	5.1598	5.94475	6.23914	6.06849	7.25665	6.38593	5.50971	5.83575	6.0968	7.24993
ENSG00000005884	ITGA3	protein_coding	5.817	6.29703	5.34324	5.95107	6.53259	6.54792	6.31749	4.98175	6.08665	6.22196	6.40538	5.12325	5.33574	6.27372	5.70699	5.2022	5.66397	4.25901	4.73488	6.20842	4.44258	5.13291	5.53656	4.73728	7.72613	5.11001	6.65474	4.5892	5.99851	5.66052	5.18743	8.12279	8.08687	7.52047	6.33246
ENSG00000005889	ZFX	protein_coding	6.18062	5.68994	5.87241	5.50202	5.83985	5.90071	6.11511	6.06049	5.0683	6.37665	5.67465	6.26779	7.11194	6.51893	6.15534	6.17256	5.85027	7.71608	6.04528	6.05523	6.6161	5.93399	5.59498	7.10736	5.49578	6.04017	5.73499	6.46807	6.2161	5.96565	6.203	4.62216	4.51984	4.38449	5.72296
ENSG00000005893	LAMP2	protein_coding	7.65639	7.1369	7.49636	7.52397	7.54303	8.11879	7.49301	7.11009	6.99944	7.95909	7.079	7.55466	8.03285	7.95809	7.14504	7.36026	7.23657	7.80935	7.16196	7.57085	7.42137	7.76663	6.79342	7.85007	7.4339	7.9319	6.84707	7.72613	7.40983	7.28124	7.15191	6.98162	6.27212	6.82098	6.79222
ENSG00000005955	GGNBP2	protein_coding	6.18612	5.83174	6.08665	5.72392	6.07997	5.83751	5.99182	5.70732	5.83018	6.17897	5.91589	6.32082	6.59301	6.15949	5.95963	6.26959	5.89814	6.9415	6.05609	5.95838	6.59061	5.76611	4.9643	6.68826	5.29679	5.838	5.78594	6.32133	6.06284	6.17916	6.00139	5.03357	5.28002	5.10414	6.62841
ENSG00000005961	ITGA2B	protein_coding	0.975312	1.49664	1.36029	-1.06674	1.07892	-0.477937	0.664423	0.0780028	1.3362	0.450676	1.36641	0.817254	0.939137	0.817089	0.206734	0.700345	0.0230764	0.417224	0.252365	-0.135786	0.82967	0.439537	0.419661	1.35696	-0.00772021	0.0167229	0.537239	1.36995	0.485262	1.02765	0.884089	-0.392685	2.95964	0.167011	0.870515
ENSG00000005981	ASB4	protein_coding	-0.788485	-1.43395	-1.31881	-0.371665	-1.64954	-2.24529	-1.72276	-2.23696	-2.52712	0.0189123	-0.766412	-0.874531	-2.13449	-0.848113	-0.539535	-1.66898	-3.46283	-1.72766	-1.83787	-0.520094	-0.406665	-2.24183	-1.49859	-1.72287	-2.31772	-2.10759	-0.935337	-1.49813	-1.51326	-0.897828	-1.39215	-4.08843	-2.7878	-4.08843	-0.939027
ENSG00000006007	GDE1	protein_coding	5.75072	6.38161	5.25983	6.06795	5.51927	6.17631	6.25429	5.54069	6.18431	6.2657	5.79671	6.20119	5.89564	6.1602	5.66387	5.99453	5.33381	6.6904	6.1706	5.43722	6.33093	5.8047	5.83142	6.18079	6.25771	5.90766	5.76762	5.78232	6.22005	6.26939	6.32609	6.13756	5.27362	5.97342	6.65943
ENSG00000006015	C19orf60	protein_coding	4.59039	5.19075	4.27697	3.36492	3.8618	4.60726	3.93449	4.18019	5.02321	4.07462	4.35875	4.33024	4.05949	4.10101	3.93102	4.51999	5.22724	4.69116	4.28967	4.1502	4.71848	4.0415	4.02156	4.04253	5.19435	4.4037	4.24288	4.13819	4.17829	4.53413	4.12341	4.08871	4.09154	5.22098	4.15229
ENSG00000006016	CRLF1	protein_coding	-0.877595	4.91552	3.91746	-0.925093	0.762576	0.65998	-0.0373039	0.303884	3.67701	2.18525	2.73002	1.5057	1.73353	1.17541	1.79126	0.809611	0.417096	0.601909	1.09099	1.02519	-0.00019584	-1.45779	1.00117	-0.515172	-0.0494523	1.7066	1.49787	-1.79383	1.81887	1.78169	0.579271	-0.719258	-0.694489	2.58282	2.53679
ENSG00000006025	OSBPL7	protein_coding	2.53986	3.95137	2.68162	2.28111	3.23928	3.17946	2.72043	3.31096	3.24248	2.44142	3.54207	2.20552	1.91685	2.1793	2.59644	2.14975	3.8306	2.06779	2.77674	2.793	1.58726	3.25512	3.33524	2.05259	3.55374	2.88617	2.92986	2.30639	2.07988	2.55976	2.3161	3.54419	3.18787	3.88368	3.02577
ENSG00000006042	TMEM98	protein_coding	6.72177	6.57715	4.85622	5.50124	6.11123	5.92017	7.12305	5.94493	7.01487	7.04069	6.99287	5.59206	5.81133	6.87345	6.51061	5.79056	6.22179	4.30411	4.84573	5.64785	5.1807	5.6576	6.18742	5.8735	5.40117	5.79663	6.6564	6.03633	6.34224	5.67697	6.14804	5.71671	5.55541	6.72531	6.55846
ENSG00000006047	YBX2	protein_coding	1.50234	3.05469	3.96037	1.02058	1.88682	-0.821442	1.19343	1.15784	3.1981	1.02737	1.18646	3.02821	1.49494	-0.519873	1.74186	1.05127	-0.022958	3.58177	1.4384	1.84236	3.13995	-0.238901	3.75607	2.55782	-0.812832	1.05661	2.39533	2.07887	2.41564	3.03268	2.58618	3.01785	0.964415	-0.0566025	2.54354
ENSG00000006062	MAP3K14	processed_transcript	4.8466	4.1126	4.24479	3.20462	4.20256	4.16665	3.64174	4.22425	4.99754	4.764	4.30644	4.36473	4.71104	4.25907	3.50605	4.66518	4.4811	4.8906	2.97727	4.06627	4.5089	4.44854	3.25946	4.70219	2.81462	4.14814	4.24288	4.006	3.1899	4.41914	3.17347	2.94584	4.37932	4.38671	3.9813
ENSG00000006071	ABCC8	protein_coding	-2.61867	-0.256507	0.392953	-4.08843	-2.05437	-1.4618	-2.04739	-2.23696	-3.10613	-2.32064	-0.0883362	0.270087	0.101064	0.379179	0.08523	-0.586296	-1.40393	0.279504	-0.265149	-1.58881	-0.406665	-2.88789	-2.45999	-0.952914	-3.52046	-0.863391	0.352919	-1.63842	-0.241398	0.286199	-0.186129	-2.62904	-4.08843	-2.68495	0.0549622
ENSG00000006074	CCL18	protein_coding	2.94908	5.59556	2.47523	5.66633	1.80332	8.81004	4.71579	2.71162	2.06626	6.13465	1.30888	1.65648	6.56324	4.54655	2.56837	5.48558	4.46034	5.04733	1.96266	4.02375	3.58573	7.859	1.86764	1.32216	0.669229	6.11601	0.308552	3.70221	4.31558	1.61485	2.78321	-0.425528	1.35244	-1.16594	3.6407
ENSG00000006075	CCL3	protein_coding	3.60011	3.41197	2.39931	5.29863	3.36108	5.65935	4.33439	3.76603	6.39462	4.81381	6.01308	3.72228	4.42741	4.02129	4.04539	5.92717	4.40491	5.07881	5.58761	1.45132	4.1879	3.41849	1.94339	3.2965	2.31181	4.47099	1.12834	5.07951	2.94974	2.88716	2.97815	3.1519	2.33573	5.68602	2.8353
ENSG00000006114	SYNRG	protein_coding	5.70541	5.42441	5.14015	5.08709	5.60499	6.02444	5.75633	6.0116	5.0683	5.65825	5.69724	5.89227	5.67166	5.47855	5.56932	5.4638	5.6374	5.78008	5.62845	5.20601	5.55805	5.77284	5.48679	5.64621	4.96076	5.8307	5.65641	6.12376	5.72637	5.233	5.89889	5.12572	5.17057	4.63529	5.25649
ENSG00000006118	TMEM132A	protein_coding	4.35887	5.24357	3.88443	4.17072	5.23353	3.12599	3.61323	3.92012	4.27693	4.14549	4.32469	3.09429	3.87797	5.48656	3.9851	3.34463	4.11991	2.80503	3.18868	5.04393	3.11291	3.10539	5.07475	3.23703	6.53599	3.80195	3.47266	3.77316	3.59683	3.26559	3.4651	6.48495	4.06027	4.94261	3.39778
ENSG00000006125	AP2B1	protein_coding	7.45699	7.65818	7.25305	7.68472	7.29314	7.47961	7.63358	7.25714	7.73355	7.62402	7.80421	7.42759	8.0116	7.69162	7.36269	7.29658	7.09659	7.67633	7.36559	7.15497	7.46445	7.1537	7.37642	7.5525	6.96528	7.52915	7.70052	7.64806	7.58171	7.8313	7.311	7.242	7.33789	7.14103	7.70623
ENSG00000006128	TAC1	protein_coding	-0.34553	-1.1586	-0.175472	-3.58366	-0.550714	-1.67886	-2.24196	-2.23696	-1.79493	-2.60095	-2.43629	2.37944	2.81611	1.10577	-2.71786	-0.982096	-2.19535	1.2807	-3.53278	-0.135786	1.70056	-2.42679	-3.58421	0.248576	-4.08843	1.86365	-1.51924	-2.16618	-1.51326	1.12118	-4.08843	-3.18157	-4.08843	-1.5189	-1.59501
ENSG00000006194	ZNF263	protein_coding	5.41893	4.78923	5.14945	4.0234	4.81825	4.75546	4.70401	4.56215	5.1498	4.84253	4.97968	5.27731	6.49101	5.52486	4.58868	4.74988	4.95479	6.40494	4.69082	4.94486	5.25369	4.54602	4.59454	5.99997	4.773	4.74245	5.01936	4.7438	4.57756	5.76474	4.2554	4.4831	4.56248	5.42638	5.34128
ENSG00000006210	CX3CL1	protein_coding	7.27515	5.64801	6.28322	4.11645	5.94403	4.69602	5.43459	5.15422	8.69633	5.61103	6.81189	7.11854	7.40299	6.49074	5.11348	7.20016	5.61503	8.31282	5.98364	5.31251	8.22713	4.87974	3.92676	7.52527	6.15524	5.99386	6.24026	7.05858	6.10072	6.5367	5.27298	4.28164	5.15411	4.32307	5.36435
ENSG00000006282	SPATA20	protein_coding	5.54751	6.52811	4.79235	4.77308	4.94419	5.74778	5.15948	4.21832	6.17747	5.42532	5.65818	5.12469	5.33372	4.83898	4.67281	4.89951	5.96452	5.61274	5.27931	5.3235	5.37387	5.29593	4.42156	4.7005	5.20549	4.91254	5.08987	4.84935	5.04066	4.84808	5.44096	5.22825	5.86745	6.26893	5.37763
ENSG00000006283	CACNA1G	protein_coding	2.47834	3.38536	2.47523	0.619408	2.75824	3.4808	1.67927	3.16649	1.04687	2.65889	3.2566	2.48174	3.7449	2.09794	2.54552	1.9848	4.0099	0.865261	0.911984	3.33093	2.44884	2.81854	2.46425	2.87236	-0.964254	3.88607	3.69145	2.7267	1.93341	1.90517	0.764803	2.3933	1.70625	2.55934	1.41805
ENSG00000006327	TNFRSF12A	protein_coding	5.76551	5.89726	5.25768	4.13477	5.90263	2.95728	2.44117	3.07319	6.37282	5.78943	4.00518	5.75786	7.6965	6.79496	3.08262	4.81848	5.52291	7.90612	3.06082	6.38834	5.97326	5.21326	4.86187	7.76558	5.62244	4.50625	4.8293	3.48695	3.83355	7.21814	1.47661	5.84359	4.68091	5.94425	4.90712
ENSG00000006377	DLX6	protein_coding	-2.10673	-2.87179	0.868843	-1.49705	-0.253847	-2.08151	-1.34177	-1.45212	-0.798526	-2.94919	-2.08836	-3.4182	-3.11898	-2.31684	-1.66599	-2.69275	-3.46283	-3.06403	-2.34462	-3.48696	-4.08843	-3.56964	2.02411	-4.08843	-2.31772	-2.52049	-2.68521	-3.00706	-3.0943	-4.08843	-2.50674	1.47756	-3.29626	-2.41314	-2.83182
ENSG00000006432	MAP3K9	protein_coding	2.55696	2.25328	1.56875	2.92014	2.52403	0.0317608	2.30523	2.05245	0.964467	3.02117	3.23746	0.389746	0.709975	2.43732	1.46574	-0.221255	0.807425	1.45075	0.252365	2.53746	0.615208	1.9635	3.29965	1.54976	1.53345	0.793716	2.72145	0.586998	1.80689	1.07517	1.19218	4.20995	2.73574	1.68633	1.41805
ENSG00000006451	RALA	protein_coding	5.71972	5.46183	5.62405	6.11483	5.78581	6.05502	5.67764	5.68025	6.05339	5.58471	5.06251	5.84768	6.46825	5.79848	5.62897	5.8589	5.47713	6.52598	5.93628	5.64172	6.38066	5.24361	5.39027	6.25531	5.7526	6.01334	5.20326	5.81211	5.79615	5.88295	5.7954	5.83928	6.0736	5.69413	5.5265
ENSG00000006453	BAIAP2L1	protein_coding	3.62871	2.82836	4.05989	5.08813	2.7189	1.48392	3.14558	2.31948	4.07082	3.10061	4.00744	2.8309	2.24289	3.51255	2.67224	2.86435	2.48835	2.79243	2.87778	2.98253	3.26188	1.88618	3.94069	3.06881	4.46191	1.76905	2.83529	2.87599	2.75789	3.19205	2.70111	4.88997	4.53062	4.56235	2.79059
ENSG00000006459	KDM7A	protein_coding	5.46042	4.45993	5.45059	4.41009	5.69171	4.96555	5.18875	5.02316	5.28539	5.01331	5.04058	5.54772	6.34871	5.64532	5.09785	5.35985	4.38742	5.97114	5.42554	5.43214	5.18882	4.3258	4.29533	6.03799	3.81441	5.19775	4.70002	5.48338	5.21271	5.00201	5.35167	4.70795	3.83314	3.43229	5.09235
ENSG00000006468	ETV1	protein_coding	4.75692	4.6031	4.07217	3.24265	5.1238	4.3536	4.14825	4.94151	3.02595	3.74637	3.8725	3.02821	3.09816	4.0617	3.9529	3.95681	4.1668	2.8422	3.68018	3.55274	3.54585	4.78441	5.16948	2.94848	4.46561	4.58993	3.64537	4.43803	3.84237	3.25531	3.51401	4.90986	3.49078	4.7242	2.012
ENSG00000006530	AGK	protein_coding	3.87022	4.33475	3.87324	4.16875	3.94937	3.66509	4.08479	3.64745	4.29811	3.84903	3.83478	4.22958	4.26786	4.09203	3.99568	3.83931	4.00704	5.08399	3.77054	4.2778	4.25127	3.91583	4.4942	4.21366	4.22867	4.04593	4.2473	4.1489	4.34071	4.62675	4.2708	4.39532	4.51577	3.93931	4.66543
ENSG00000006534	ALDH3B1	protein_coding	4.32432	5.39535	3.9337	3.80696	3.34641	4.97489	5.6026	3.44566	4.77084	5.6783	4.90643	4.30763	3.33399	5.2175	4.7473	3.76325	3.98686	2.68743	3.15329	3.39489	3.22448	4.40762	2.41853	3.70037	3.75504	4.23477	4.96947	4.25681	4.36132	3.65385	4.21501	4.21794	4.32926	5.67696	4.20861
ENSG00000006555	TTC22	protein_coding	-0.0582803	0.294284	1.64962	2.4003	0.522618	0.135302	1.11428	1.19052	-0.314127	0.162521	0.674167	-0.546934	-1.14232	0.255996	-0.0826266	-1.82361	0.45117	0.350007	-1.25901	1.67387	-0.572325	1.35151	0.190134	-0.230548	3.41103	-1.2037	0.937592	-1.63842	0.966249	-0.244818	0.228827	3.28727	3.17074	2.97472	-0.383461
ENSG00000006576	PHTF2	protein_coding	5.14125	5.23316	4.84338	5.41644	5.20941	5.50359	4.91722	5.21008	3.75261	5.4146	4.51636	5.14751	5.18307	6.05558	4.99302	5.09025	5.12804	4.92565	4.68928	4.93198	4.9519	5.32369	4.75293	4.97284	5.42992	5.65666	4.48263	5.42399	4.97397	4.4844	4.92486	4.57209	4.04343	3.91176	4.25048
ENSG00000006606	CCL26	protein_coding	-0.166418	-0.553328	-1.95271	-1.40011	-2.61912	-0.887576	-0.952799	-1.55671	-0.034473	-1.40767	-0.70587	-0.785399	-0.685024	-0.519873	-1.29214	0.235645	0.640266	-3.06403	-0.646607	-2.73692	-0.863067	-1.56229	-2.2769	-2.04748	-1.22613	-1.303	-1.36756	-0.623179	-1.7759	-0.645878	-2.50674	-2.79079	-3.01975	-1.16594	-2.00376
ENSG00000006607	FARP2	protein_coding	4.99203	4.99338	5.11188	5.0087	4.94175	4.38019	4.66288	4.57149	4.64421	5.02589	4.95879	5.23267	6.40349	5.32867	4.81933	4.8508	4.25865	6.33496	4.89209	5.07419	5.06908	4.21949	4.32926	6.25531	5.45905	4.69177	4.90575	4.98255	4.91385	5.16599	4.47652	4.56375	4.31062	4.24917	5.05267
ENSG00000006625	GGCT	protein_coding	4.6926	4.48271	5.20402	6.01179	5.34569	4.4404	5.85092	4.33436	5.45907	5.12421	4.56784	5.30802	6.18972	5.32994	5.80465	4.51798	4.52175	8.69762	5.2875	6.06444	5.9695	4.59544	4.63793	6.55225	5.48669	4.67719	5.64195	5.55459	5.7771	7.18975	5.51584	5.42128	6.15117	5.17795	6.92291
ENSG00000006634	DBF4	protein_coding	3.44797	2.43037	3.07232	3.42569	2.94027	2.5078	2.40005	2.46014	1.23438	2.9371	2.79954	2.23778	4.71723	3.49903	2.34174	2.23057	2.68013	4.56346	1.60484	3.33529	2.09531	3.00838	3.26685	4.08206	3.58476	2.55155	2.4059	2.13382	2.28365	3.39294	1.78938	3.46801	3.42298	2.22318	2.93624
ENSG00000006638	TBXA2R	protein_coding	3.0248	4.02564	3.38732	1.84988	2.31382	2.69455	2.51236	2.41245	3.35996	2.76022	2.54933	3.49207	3.38154	3.8003	3.02596	3.41548	3.21431	3.15931	3.38453	2.11973	2.31289	1.74002	1.68108	2.59473	1.83811	3.44069	2.75077	2.66087	2.49239	3.94355	1.97282	0.840269	1.52407	1.86295	2.79059
ENSG00000006652	IFRD1	protein_coding	6.19776	4.60541	5.26412	3.94944	4.97194	4.36429	4.81298	4.33436	5.86892	5.32584	5.62616	5.72316	6.2897	5.49339	4.72967	5.98801	4.46868	6.40494	4.79926	5.08457	6.37995	4.62994	4.4942	6.84086	3.945	5.49794	4.82044	5.95475	5.07226	5.60392	5.15577	4.81023	4.83125	4.10525	5.0503
ENSG00000006695	COX10	protein_coding	3.31856	4.05971	3.09175	3.33002	3.07988	3.02625	3.65927	2.92571	3.92047	3.60684	3.67322	3.53596	4.51886	3.4945	3.57538	3.07599	3.12741	4.96268	3.55694	3.18422	3.77872	2.93349	2.86574	4.05052	3.36411	3.23927	3.89832	3.25382	3.7733	4.66801	3.64139	3.47692	3.89701	3.32962	4.33074
ENSG00000006704	GTF2IRD1	protein_coding	2.95555	3.82634	4.07461	4.01463	3.8618	2.87491	3.00455	2.59441	3.34375	2.92373	3.39433	2.91973	3.43511	3.07591	2.98409	2.89566	3.2389	2.36879	2.79981	3.20339	2.85999	2.77094	4.62505	3.07405	4.5778	2.81099	3.40052	2.55211	2.90552	3.40694	2.87824	5.0971	4.75976	4.59928	3.64699
ENSG00000006712	PAF1	protein_coding	5.71592	5.78872	5.00707	4.79883	5.02819	4.896	4.88032	4.83831	6.11677	5.03681	5.42342	5.40708	5.50453	5.64327	4.86388	5.52015	5.10012	5.62346	4.87454	5.05453	6.07921	4.62102	4.86309	5.72574	5.8011	5.00495	5.32867	5.25087	5.20246	5.81896	4.78164	5.28518	5.98085	5.39798	5.69897
ENSG00000006715	VPS41	protein_coding	5.95485	5.70831	5.64146	6.08322	6.03263	6.1311	6.06665	5.93833	5.67365	6.05635	5.56835	6.12204	6.14219	6.29212	5.8297	6.02813	5.66034	6.20666	5.92189	5.61958	6.2718	5.89196	5.70925	6.26622	5.28004	6.21354	5.67509	6.19072	5.99191	5.94182	6.00007	5.76436	5.41921	5.51042	5.84345
ENSG00000006740	ARHGAP44	protein_coding	5.52378	5.24061	2.93924	3.97903	3.64809	3.02175	6.31085	3.82446	4.82146	5.96542	5.71118	4.26653	4.01996	6.37402	5.16686	4.17672	3.64802	3.17881	2.85041	3.40734	3.73506	3.30796	2.9645	4.26036	2.88277	3.36992	5.59885	4.79584	5.66303	4.22739	4.83444	3.17399	1.95057	2.9982	4.6278
ENSG00000006744	ELAC2	protein_coding	5.05959	5.74017	4.99294	4.9058	4.90467	4.94551	5.26173	4.82537	5.24232	5.15029	5.3558	5.65811	5.97141	5.09255	5.37562	5.13686	5.04819	6.35867	5.654	4.9548	5.63133	4.57864	4.34681	5.66802	5.31335	5.16562	5.55205	5.17299	5.79539	6.20942	5.40451	5.18947	5.76162	5.35431	6.12976
ENSG00000006747	SCIN	protein_coding	2.36637	3.05469	1.98703	3.31939	2.03144	5.10918	3.71399	2.46682	3.84187	4.66093	3.80128	2.75121	4.29708	3.24201	2.21713	5.14601	3.05725	2.7144	4.79353	1.86662	3.70821	4.01903	2.86574	4.33426	1.89422	3.28272	3.35489	4.97354	3.58637	2.70278	3.15935	1.91806	2.77253	1.8883	2.8353
ENSG00000006756	ARSD	protein_coding	5.03844	5.56743	4.68772	5.60269	4.74181	5.41805	5.75877	4.92219	5.19341	5.41101	4.73686	5.09419	4.84147	5.60277	4.94033	5.48042	4.73557	5.3714	5.22282	5.22607	5.26601	5.20234	5.16058	5.28888	5.28529	5.15747	5.43761	5.05552	5.20475	5.12424	4.70108	5.02372	5.18087	5.66234	5.81373
ENSG00000006757	PNPLA4	protein_coding	3.89397	4.24285	2.94992	3.10491	2.87531	3.51959	4.45373	3.57195	4.35178	4.14837	3.72362	3.846	3.80427	3.56539	3.8817	4.03765	3.41755	4.51825	3.93848	3.51103	4.40407	3.41506	3.72957	3.86957	2.76733	3.82858	4.31193	3.96416	4.30923	4.35801	4.03337	2.60731	3.22152	4.10795	4.58098
ENSG00000006831	ADIPOR2	protein_coding	7.39205	7.38715	7.07173	6.30341	6.75097	5.85783	6.80758	6.20144	7.6659	7.29728	7.11406	8.40577	8.43503	6.99681	7.35162	7.5375	6.07995	9.51766	7.8793	7.21908	8.64908	6.27745	6.223	8.55427	6.44547	6.83653	8.13133	7.85375	7.64926	8.46727	7.734	6.70314	6.10007	5.63358	7.82807
ENSG00000006837	CDKL3	protein_coding	0.496943	0.466697	0.039856	0.709063	0.297008	0.749731	0.822178	0.694066	1.26912	0.690749	1.05268	0.500235	0.896125	0.212482	0.871757	1.29625	0.417096	0.816296	0.731774	0.243468	1.70056	0.543916	0.251029	0.664299	-0.0494523	0.441652	0.630301	0.922772	0.830932	1.02765	0.906806	-0.425528	0.899369	0.624672	0.477924
ENSG00000007038	PRSS21	protein_coding	-1.07425	-2.87179	4.93765	0.948776	2.49105	1.22694	-3.06094	0.865763	-0.536091	-1.40767	-1.19526	-2.3377	-2.54434	-0.848113	-3.60668	-0.731858	1.36725	-0.236091	0.317763	-0.0883763	-1.37289	0.568872	0.546539	-3.48513	6.47934	-3.10118	-2.87684	-1.14426	-1.7759	-2.97645	-3.09089	3.45904	3.67938	4.06135	-2.57623
ENSG00000007047	MARK4	protein_coding	4.8656	5.51559	4.69727	3.99694	4.76545	4.07412	4.49337	4.22228	5.17521	4.84786	4.90643	4.80947	4.84147	5.2175	4.41989	4.65057	4.22704	4.99879	4.60991	4.39503	4.73631	3.94471	4.66056	4.79552	5.13155	4.45589	4.77734	4.80602	4.53646	4.75448	4.53602	5.33444	4.92206	4.53252	5.1675
ENSG00000007062	PROM1	protein_coding	-1.90589	-1.43395	-0.543865	-1.60099	2.35838	-2.8906	-3.06094	3.26567	-1.79493	-1.8843	-1.94151	-0.622126	-1.14232	-0.943332	-2.02787	-0.518676	-0.520747	-1.2395	-0.998021	-0.874898	-1.09558	1.50163	5.67563	-1.45804	-0.136723	-1.93838	-1.36756	-1.96803	0.392185	-0.725071	-1.77044	5.32398	1.18514	1.46833	-2.17055
ENSG00000007080	CCDC124	protein_coding	4.63537	5.50079	4.64398	4.89986	4.25849	4.20484	4.22089	3.97976	5.55018	4.4034	4.84705	4.64883	5.0931	4.33965	4.17389	4.41799	4.68277	5.29751	4.67842	4.357	5.14444	3.99392	4.79059	4.86213	5.51022	4.35364	4.68924	4.32687	4.67297	5.26537	4.514	4.89995	4.65405	5.60615	5.18811
ENSG00000007129	CEACAM21	protein_coding	-0.111336	0.656747	-2.79282	-0.466653	-0.606723	1.33238	0.664423	1.20659	0.521242	0.976442	0.223251	0.873081	0.496198	0.845854	0.472085	-0.454084	1.11432	-0.236091	1.25022	-1.04549	-0.00019584	1.48861	-0.679412	-1.23437	-1.80761	1.15342	-1.23031	-0.484298	0.109899	-2.12365	-0.285641	-1.51358	-1.0324	0.898609	-0.489748
ENSG00000007168	PAFAH1B1	protein_coding	7.36347	6.99182	7.05172	6.586	7.46091	7.2846	7.29273	7.04373	7.30798	7.4392	7.12608	7.591	7.87601	7.58502	7.28786	7.60963	7.22738	8.17942	7.49712	7.42583	7.66188	7.17239	7.69542	7.97398	6.53907	7.50206	7.1031	7.46706	7.30469	7.60893	7.26613	6.2291	6.28769	6.4216	7.34528
ENSG00000007171	NOS2	protein_coding	-0.283322	-0.0104575	-0.085449	-2.66858	-0.924925	-0.63949	-0.717387	-0.946659	-0.798526	-1.15966	0.191773	-3.4182	-2.13449	0.298237	-0.995505	-1.66898	0.0230764	1.71396	-0.470654	-0.342732	-1.71651	-2.42679	-1.22541	0.0502338	-1.95846	-0.941243	-0.264747	-0.623179	-1.29115	-0.897828	-0.00559516	-1.74271	-1.8686	-0.645846	-0.939027
ENSG00000007174	DNAH9	protein_coding	0.224627	1.32798	-1.42524	-3.58366	0.671324	-0.887576	2.61656	1.55918	1.40029	0.658803	0.99913	1.62431	1.34307	0.528595	1.89434	1.17895	-0.895787	2.33442	0.911984	0.602466	2.22723	-0.114493	1.4922	0.941497	-1.32516	-0.254274	1.00865	1.49274	1.43922	3.36453	1.97282	-0.073544	-2.58804	1.79756	2.70885
ENSG00000007202	KIAA0100	protein_coding	6.95417	7.94804	6.98056	6.80101	6.48607	7.10069	7.2755	6.78651	7.04651	7.52228	7.24754	7.49029	7.74465	7.40314	7.25037	7.49468	6.56978	7.96417	7.62575	6.80404	7.66129	6.85588	6.9163	7.51158	7.01262	7.43166	7.50073	7.55147	7.6256	7.36039	7.40226	7.19027	6.89567	6.1742	7.68214
ENSG00000007237	GAS7	protein_coding	6.12722	8.17285	6.88879	4.90817	6.90349	7.2533	6.01992	5.93412	5.51985	7.25283	6.88598	6.9381	7.60013	7.05917	6.49093	7.13735	6.70522	5.78486	5.39462	6.47522	6.58999	6.75823	6.74429	6.60883	5.20991	7.40586	6.86274	6.46325	6.38816	6.20007	6.66904	6.12875	4.5885	6.1883	5.76834
ENSG00000007255	TRAPPC6A	protein_coding	3.47071	3.69378	3.98135	3.30148	3.21121	3.31795	3.40036	3.27332	4.27266	3.32073	2.99001	2.98453	3.19894	3.36137	3.05457	3.0977	3.8176	3.53714	3.22749	3.12007	3.6946	3.25127	2.73328	3.5009	3.98172	2.84037	3.10869	3.26862	3.20366	3.60206	3.07661	3.84544	5.2255	4.86173	3.74105
ENSG00000007264	MATK	protein_coding	2.01676	1.98201	-0.000714982	1.29122	0.909572	4.97605	1.0938	2.49979	2.38414	1.56431	1.12112	1.35701	1.31068	1.73248	0.943438	0.519164	3.91848	1.38511	2.10839	1.91396	0.761664	3.14326	1.72467	1.47253	1.40029	3.14823	1.07637	0.707816	0.966249	1.94408	1.59325	0.769485	0.336963	1.48504	1.27931
ENSG00000007312	CD79B	protein_coding	3.85991	2.01016	2.26029	1.18585	2.33628	2.11048	2.23213	4.57149	3.43838	2.18525	2.33554	2.39859	1.52348	2.57254	2.17308	2.3439	3.98976	1.76646	2.61705	2.84887	1.48553	2.3778	1.9977	1.89577	0.416821	2.3292	1.81577	2.38097	1.62795	2.3536	1.80155	1.17203	2.09554	3.72389	2.11533
ENSG00000007314	SCN4A	protein_coding	3.21461	3.83029	4.12498	1.70485	3.50347	0.874684	3.91419	3.04666	5.54664	3.42887	5.40724	4.52143	3.27645	4.73326	4.35401	3.54359	2.58359	5.63409	5.13028	3.59692	4.61147	2.26015	1.61311	4.73728	-2.12693	4.0434	4.21611	5.36665	4.40961	5.03693	4.0047	0.567333	-0.0558655	0.498656	5.69138
ENSG00000007341	ST7L	protein_coding	3.17638	2.94231	3.09175	2.92483	3.39713	3.25803	3.2511	2.63058	2.92061	3.65621	3.56988	3.82493	3.86129	3.14697	3.6576	4.21943	3.3649	3.8905	3.81934	3.09975	4.23569	3.10964	2.91361	4.24186	3.15035	2.75655	3.68061	3.67653	4.03684	3.97834	3.3702	2.75751	4.19172	3.95439	3.32519
ENSG00000007350	TKTL1	protein_coding	-0.972574	-1.43395	0.846146	-2.91423	-0.550714	-2.08151	0.455516	1.01918	-1.11955	-0.76363	-1.37214	-1.56974	-1.14232	0.631305	-1.77683	-1.52934	-0.394348	-1.46303	-0.172424	-0.796613	-0.974643	-1.26906	-0.797779	-0.952914	-3.11399	-1.40963	-1.60152	-0.697978	0.257935	-1.20329	-2.50674	1.66861	-1.98659	-3.02016	-1.48099
ENSG00000007376	RPUSD1	protein_coding	2.66345	4.1126	3.51152	4.04077	3.03024	3.06173	2.70025	2.82524	3.44599	2.93043	3.30521	2.53463	3.58483	2.92232	2.93217	3.0372	3.20435	3.83012	3.09386	3.18903	2.6597	2.89947	4.1943	2.87236	5.07683	2.75037	2.89277	2.7267	3.22181	3.68864	2.76468	4.24167	3.89909	5.21849	3.62805
ENSG00000007384	RHBDF1	protein_coding	3.92394	5.31018	4.02242	2.84797	4.06144	4.08494	3.7987	3.83741	5.11918	3.79126	4.54778	4.22958	4.34585	4.00225	4.38974	4.35629	4.78149	3.4754	4.14852	4.15759	3.97167	3.49861	3.44356	3.80173	3.72441	4.49706	4.46506	4.00305	4.0572	4.66995	3.93734	4.14712	3.80899	4.81623	4.39562
ENSG00000007392	LUC7L	protein_coding	4.94245	5.32567	5.12136	3.49034	4.8679	4.71146	4.17531	4.82667	5.41515	4.50122	5.02504	4.23758	5.36166	4.69424	4.81814	4.88553	5.35422	6.00294	4.72888	4.65565	4.9821	4.58171	5.04497	5.59429	3.945	4.84167	4.66855	4.75961	4.58809	5.33657	5.10633	4.81814	4.64043	5.51449	5.05149
ENSG00000007402	CACNA2D2	protein_coding	1.44836	1.23564	1.48307	2.70818	2.3945	0.81356	1.30457	1.48208	2.19832	1.30012	2.24642	1.8773	1.27755	1.87884	1.45352	0.911181	1.76955	0.958469	1.49604	1.40237	1.20739	0.87932	2.86086	1.82297	-0.229614	1.26163	1.76741	1.36995	1.27513	2.2013	1.2287	3.85743	0.0377811	1.19118	2.16871
ENSG00000007516	BAIAP3	protein_coding	1.88751	2.03777	2.29423	0.833892	0.987299	-0.332666	1.21256	1.59624	2.84202	1.00213	2.26166	2.09248	1.68382	1.9861	0.994955	1.52175	2.0946	2.35171	2.22377	0.981423	1.50645	0.797223	1.1202	1.78515	1.44606	0.817549	1.60264	0.971854	0.572696	1.35092	2.07665	2.26538	1.89326	3.80599	1.54461
ENSG00000007520	TSR3	protein_coding	4.54182	5.40995	4.38327	4.3814	4.23279	4.45881	4.38374	4.38289	5.75403	4.36679	4.65266	4.73044	4.52945	4.25639	4.51707	4.87457	4.91872	5.31963	4.91076	4.30468	5.235	4.1238	4.61784	4.26724	5.28424	4.51902	4.50615	4.61067	4.8814	5.10434	4.51029	4.41864	4.35375	5.72962	5.00087
ENSG00000007541	PIGQ	protein_coding	4.46688	5.68994	4.50418	4.22492	4.35695	4.20086	4.34526	3.94427	5.30226	4.16836	4.76787	4.52579	4.60151	4.38935	4.21791	4.50788	4.33135	4.8577	4.40888	4.03984	5.04782	3.99161	5.27037	4.46959	5.54306	4.33931	4.54252	4.6029	4.66305	5.00508	4.53602	5.32398	4.89103	6.09135	4.8565
ENSG00000007545	CRAMP1L	protein_coding	4.91452	5.50327	4.75324	3.77877	4.61593	4.51588	5.19357	4.69335	4.6541	5.0721	5.44194	4.90127	5.30318	4.6129	5.19007	4.97329	4.73038	5.26138	4.81067	4.43411	4.51924	4.18359	4.85085	5.03055	4.356	4.68854	5.15318	5.40513	4.93738	4.83088	5.08781	4.78623	4.74941	3.87102	5.20525
ENSG00000007866	TEAD3	protein_coding	4.82028	5.55673	5.40763	3.86175	5.67272	3.96592	4.34092	3.98443	5.9025	4.96351	5.56758	5.34674	5.84706	4.88821	4.44635	5.18329	5.13329	6.19952	5.24295	5.17356	5.55554	4.10898	5.67216	5.8877	5.22968	4.91668	5.39647	4.628	4.66305	6.05206	4.31818	5.4555	5.68831	5.71464	5.96412
ENSG00000007908	SELE	protein_coding	6.50919	5.62771	6.18602	4.69431	6.37614	1.60911	5.68793	2.13031	7.4754	6.90812	7.71759	8.33904	8.76085	8.65607	3.91105	9.0269	0.0676873	7.48448	3.96423	4.2778	7.87828	3.51475	1.34634	6.19348	0.476851	7.09817	0.330906	8.37928	4.99654	4.32399	2.12589	-1.2556	0.0377811	0.683779	1.1788
ENSG00000007923	DNAJC11	protein_coding	4.81139	5.36707	4.75018	5.4338	4.52275	4.49332	4.76844	4.26893	5.12156	4.86195	5.02057	5.09858	5.49014	4.86029	4.77212	4.743	4.4666	6.05663	4.79926	4.72031	4.9519	4.50297	4.8298	5.19464	5.6116	4.81083	5.10616	4.80264	5.11293	5.4502	4.85211	4.79783	6.54191	5.47947	5.49288
ENSG00000007933	FMO3	protein_coding	3.15407	3.41724	2.04797	1.42953	2.52403	1.67931	3.72735	1.8423	4.26837	3.48915	2.29907	2.95249	2.11743	2.03688	2.56269	3.27964	4.33135	3.19805	3.79084	3.16478	4.13513	1.24715	2.48341	3.0316	-1.22613	2.72539	2.8624	3.20846	4.11417	4.86	3.38241	-0.719258	0.125718	2.90191	2.42422
ENSG00000007944	MYLIP	protein_coding	6.52449	6.09994	5.84334	5.2217	5.75905	6.15696	6.41464	5.16967	6.16599	6.00169	5.67962	5.49866	5.7747	5.19811	5.96932	6.25879	5.77155	5.90535	6.35908	5.21902	5.67935	5.50998	4.48472	5.6506	4.80409	5.49979	6.11985	6.38727	6.07661	5.97037	5.89676	4.72114	5.10357	4.69397	5.0668
ENSG00000007968	E2F2	protein_coding	-0.972574	1.57411	3.2384	3.8196	-0.209807	-0.42787	-0.130637	1.32905	-0.214763	-1.54974	-1.37214	0.602861	-0.973262	0.928859	-0.539535	-0.586296	0.346435	-1.046	-0.0853001	-0.0883763	-2.16845	0.0362751	3.19506	-0.283157	4.73509	0.31343	-3.09787	-1.14426	-0.344431	-1.59129	-1.09273	2.84273	3.75945	-0.209556	-1.18471
ENSG00000008018	PSMB1	protein_coding	6.5234	6.4955	6.46785	5.94416	6.04348	6.12535	6.33505	6.04549	7.40587	6.52357	6.29537	6.6031	6.98876	6.57959	6.17595	6.61783	6.45062	7.6306	6.48408	6.33173	7.24309	6.09835	6.21012	6.96201	6.40645	6.37533	6.42888	6.51953	6.58193	7.27362	6.32398	6.25395	6.74386	7.38093	7.21467
ENSG00000008056	SYN1	protein_coding	2.12394	1.7843	0.392953	1.50657	0.356803	-0.583604	2.49684	-0.629002	3.02595	3.20384	1.475	0.569457	1.98	3.85438	0.757079	0.700345	0.0676873	2.77971	-0.920557	0.417778	0.363205	-0.328231	-0.860815	3.17987	-0.381229	-0.254274	2.62072	0.347661	2.37567	2.38222	0.813707	1.30811	-0.910756	1.65714	3.49852
ENSG00000008083	JARID2	protein_coding	4.77348	4.23691	4.39504	3.63175	4.90717	4.47041	3.95735	4.1242	3.72159	4.03161	4.08016	4.13571	6.82068	5.1995	3.8068	3.84894	3.88147	5.61989	3.92542	5.09744	4.1879	4.27742	4.99467	5.02109	4.48401	4.20797	3.44219	4.58526	3.90267	4.89021	4.10389	4.24298	4.20692	3.10477	3.91776
ENSG00000008086	CDKL5	protein_coding	1.48457	2.10456	1.2084	1.247	2.25218	1.54787	1.54989	1.17427	-3.10613	1.96782	1.71534	2.15011	1.49494	1.00735	1.76182	1.29625	1.75598	1.65948	1.3936	1.85455	1.25763	1.27775	1.92482	1.65138	0.148092	2.0462	2.06947	2.07887	1.78265	-0.132586	1.76472	1.6131	-0.156015	-1.27428	1.08934
ENSG00000008118	CAMK1G	protein_coding	-0.877595	-0.638164	-1.665	0.367372	0.065742	1.37531	-0.869986	-0.417238	-1.79493	-1.54974	-0.486302	-4.08843	-3.11898	-2.94625	-0.0131234	-2.69275	0.957211	-2.47103	-4.08843	-1.46255	-2.46169	0.568872	-0.518291	-2.24205	-0.49195	-0.941243	0.612163	-2.66939	-2.77355	-3.42786	-3.09089	-0.360573	-1.8686	0.768132	-2.35918
ENSG00000008128	CDK11A	protein_coding	4.76247	4.94681	3.72251	4.17466	4.44568	4.15643	3.6382	4.1242	4.39568	4.21029	4.51794	4.66671	4.23803	4.24564	3.54113	4.36751	4.53968	5.42953	4.47308	4.39711	4.22626	4.08323	3.92208	5.02516	4.28642	4.10037	4.20707	4.40042	4.15014	4.68343	4.43219	3.50552	4.70133	4.16351	4.8222
ENSG00000008130	NADK	protein_coding	6.15206	6.71714	6.45993	5.69678	6.02574	6.36387	6.39122	5.58591	7.10658	6.61329	6.51556	6.70947	7.31999	6.3384	6.44304	6.44602	5.79827	8.38595	6.82079	6.26542	7.11395	5.74505	5.38008	7.33085	6.06889	6.27185	6.37578	6.77767	6.61578	7.6534	6.34233	5.20564	6.52517	5.90753	7.95679
ENSG00000008226	DLEC1	protein_coding	1.70006	1.5164	-0.129758	-0.796122	0.496272	-0.287321	2.77292	0.944511	1.78344	3.11245	2.30644	1.6723	0.552684	1.96002	2.05668	1.13763	1.04907	0.865261	1.01416	0.981423	1.25763	0.568872	0.909701	1.73312	-1.67105	0.378965	2.81561	1.59027	2.2398	1.53212	3.07159	-0.209932	1.99794	2.4444	2.13334
ENSG00000008256	CYTH3	protein_coding	5.85553	6.18728	5.52124	5.30314	6.03263	5.64845	5.97861	5.7688	6.42864	6.11124	6.67381	5.83895	6.39483	5.57082	6.12531	5.89963	6.26673	6.61456	6.50178	6.15464	6.11542	5.43391	5.83205	6.66502	4.15019	5.87183	6.4126	6.29566	6.02265	6.46548	5.90384	5.90019	4.87102	5.98815	6.60156
ENSG00000008277	ADAM22	protein_coding	3.87363	3.0274	4.94568	2.69727	4.72206	4.03002	4.08479	4.46365	2.65763	3.1474	3.93324	4.97965	4.5948	3.53038	4.35566	4.65972	4.34274	3.73453	4.17081	4.08965	4.67293	3.63188	4.31864	4.70219	1.43096	4.59166	4.83908	3.66165	3.45446	4.86508	3.81356	3.01785	1.50233	4.2854	4.6278
ENSG00000008282	SYPL1	protein_coding	7.32124	6.3211	7.20508	6.88155	6.88044	6.79752	7.17486	6.90478	7.28906	7.30761	6.61496	7.14748	7.31592	7.14124	7.14004	7.30477	6.8819	7.83531	7.17966	7.10677	7.49029	6.62439	6.37522	7.34798	6.54697	6.93651	6.51285	7.46545	7.26258	7.06104	7.23869	5.9187	6.32339	6.10561	6.85192
ENSG00000008283	CYB561	protein_coding	4.35154	5.85229	5.24364	4.8807	5.06563	4.80341	4.72747	4.59456	5.47776	4.56509	4.93166	4.68437	4.72954	4.90539	4.67676	4.98061	4.89261	4.03124	4.60828	5.65309	4.55483	4.50297	5.05248	4.4415	6.53731	5.04588	4.92332	4.28379	4.97664	4.49536	4.44582	6.30708	5.98673	6.95785	4.2628
ENSG00000008294	SPAG9	protein_coding	7.36195	7.06577	7.10348	5.81886	7.18647	7.16429	7.15893	6.79251	6.38871	7.25683	7.03671	7.31084	8.52755	7.4897	7.1367	7.14291	6.94416	7.99234	7.09563	7.41944	7.31306	6.81474	5.96579	8.3185	5.59646	7.35917	6.92261	7.42251	7.01486	7.33956	7.08936	6.08169	5.52744	5.75137	6.97878
ENSG00000008300	CELSR3	protein_coding	0.695359	1.5164	1.31142	1.72648	1.27763	-0.0416401	0.518353	0.963544	-0.214763	0.20738	1.15416	0.270087	0.709975	1.26333	0.422777	0.384358	0.753829	1.00291	0.707578	0.482004	1.10133	1.11784	2.50857	0.578443	0.505955	0.501728	0.215502	0.89759	0.359776	0.927633	0.739715	2.66695	2.00569	1.23136	1.08934
ENSG00000008311	AASS	protein_coding	5.42476	3.93311	4.71929	2.42035	4.8921	3.3895	4.99798	4.03928	3.81861	4.97166	4.45801	5.2433	5.8639	4.94913	4.57887	4.4115	3.92758	6.86457	4.36314	4.83388	5.21448	4.34037	3.11541	6.15012	0.883982	4.31021	4.50983	5.16905	4.55626	5.632	4.82999	1.53843	2.84341	2.1412	6.27276
ENSG00000008323	PLEKHG6	protein_coding	2.61528	5.08058	1.94492	0.930253	2.17953	-0.529803	2.22273	2.1881	4.08064	1.77269	2.53686	5.20302	1.4361	-0.519873	4.10717	3.74273	-1.40393	4.29966	3.93066	1.74102	5.494	1.47547	2.5455	3.12036	3.09397	2.82281	2.97668	2.95134	4.80221	4.02143	5.06905	4.02633	2.22063	1.27045	2.54354
ENSG00000008324	SS18L2	protein_coding	3.73021	2.73868	3.39125	3.44213	3.27846	3.3032	2.90224	3.12483	4.34772	3.5072	3.29784	2.91309	4.56422	4.03072	2.78872	3.25086	3.53341	4.41925	2.83374	3.39489	3.46797	3.40816	3.83526	3.74375	2.87721	3.21704	2.88901	3.26862	3.25303	3.80596	2.83743	3.4249	2.67873	4.07521	3.57301
ENSG00000008382	MPND	protein_coding	3.2413	3.95861	2.69439	3.35454	2.87019	3.83107	3.23716	2.78835	4.12873	3.11833	3.1704	3.4048	3.0597	3.05142	2.75923	3.23136	3.56098	3.65321	3.15776	3.11502	3.71272	3.56213	3.70529	3.22295	4.5623	3.11976	2.70871	2.96958	3.39573	3.598	3.18745	2.88017	3.66722	4.09983	3.40892
ENSG00000008394	MGST1	protein_coding	9.03906	8.21654	7.47641	5.73997	7.20819	5.91957	8.01809	7.28057	9.90299	8.67972	7.90441	8.97753	9.60544	7.64763	8.27527	9.85409	5.19994	10.8671	9.63273	7.99309	10.6349	6.45108	5.43688	9.84199	3.9661	8.12034	8.75345	9.32536	9.1586	9.46979	9.58679	4.06379	5.2848	6.17484	8.62269
ENSG00000008405	CRY1	protein_coding	5.101	5.15495	5.61988	4.54404	5.72187	4.43871	4.60976	4.22228	4.88164	5.14454	4.6656	4.92787	7.54376	6.22938	4.67676	4.55376	5.12935	6.61903	4.42937	6.75574	5.39787	5.52998	4.39313	7.65829	4.12461	4.60713	4.46379	4.04379	4.44673	6.05429	4.27953	4.4221	4.22362	3.50374	5.23579
ENSG00000008441	NFIX	protein_coding	7.83199	8.81044	7.01403	6.92079	7.68866	7.56515	7.42776	7.73944	7.4049	7.58683	7.52342	7.9353	8.03161	7.21337	7.85394	8.00093	7.68884	7.91668	7.51662	7.36752	7.96565	7.08616	7.14508	7.48233	6.23127	8.33189	7.83795	7.89965	7.8155	7.28819	7.81842	6.9227	6.69798	7.69155	7.22284
ENSG00000008513	ST3GAL1	protein_coding	6.79703	6.98829	6.83505	5.14546	6.42802	6.09837	7.32412	5.9984	6.59279	7.01016	6.92509	7.62975	8.94093	8.13548	6.67295	6.60794	6.05801	8.24159	6.40259	7.2311	6.98336	6.45234	5.27588	8.31131	6.85826	6.74978	6.66714	7.00285	6.89063	7.94218	6.65065	6.37571	4.58463	5.10819	7.59362
ENSG00000008516	MMP25	protein_coding	0.869757	1.37203	1.68842	-0.326418	2.57527	0.513928	0.132993	1.12441	2.54872	1.40012	0.719021	3.89739	5.0545	3.9634	0.588453	2.44897	1.29404	4.4069	2.32267	1.75409	3.88243	1.27775	0.546539	5.73072	-0.61188	3.7347	2.02903	4.9675	2.15735	3.74482	2.9346	0.370936	-0.191006	0.947666	1.73362
ENSG00000008517	IL32	protein_coding	6.04702	6.34271	5.5014	4.88431	5.65646	6.15491	4.35174	6.28845	6.74633	5.2767	4.91247	5.86155	5.91058	5.79111	4.5447	4.70638	6.72624	7.46128	5.70071	6.15032	6.42942	6.32171	5.86651	5.66802	6.6822	6.23471	4.73082	5.01658	5.66718	6.70145	5.37325	6.29011	5.41194	6.86314	4.92791
ENSG00000008710	PKD1	protein_coding	6.89948	8.00357	6.75773	5.34918	6.21282	6.50426	6.7142	6.70828	6.59535	7.20074	7.52184	7.05924	7.03286	6.63729	7.37023	7.14844	6.93215	7.00978	7.03737	6.3131	7.40718	6.17349	6.25262	6.80941	4.63161	7.15218	7.48757	7.2585	6.90403	6.40051	7.19639	5.87512	5.43866	5.71376	7.21123
ENSG00000008735	MAPK8IP2	protein_coding	2.56544	2.81246	0.191611	0.027343	0.101137	0.292895	2.65901	1.83198	2.25142	1.68024	2.51794	0.602861	0.496198	1.65333	1.59378	1.36946	0.382198	1.41831	0.285435	1.28126	1.04523	0.139836	0.445945	1.33967	-1.04637	0.378965	1.9373	0.586998	2.10942	1.90517	1.3662	1.18297	2.20726	0.286233	2.70885
ENSG00000008838	MED24	protein_coding	5.09223	5.87925	5.14131	4.81533	5.11408	4.86746	4.98414	4.76427	5.84321	5.1402	5.26419	5.37481	5.18977	5.2847	4.82527	5.00952	4.97543	5.8862	4.96024	4.51308	5.38238	4.83801	5.79865	5.81604	6.07376	5.0783	5.09967	5.14651	5.03938	5.86108	4.90243	5.44929	5.63561	5.012	5.51108
ENSG00000008853	RHOBTB2	protein_coding	5.20095	5.31301	3.99431	4.68329	4.16959	4.68753	4.37951	4.57149	4.16608	5.54812	5.12945	4.16675	3.71428	4.42075	4.67413	3.99779	4.41573	3.43542	4.46769	3.4641	3.66233	4.03927	4.07937	3.12541	4.15249	4.43486	5.7397	3.98822	4.58983	4.1068	4.37223	4.18569	3.88865	4.5305	4.69757
ENSG00000008869	HEATR5B	protein_coding	5.25042	4.93217	4.78491	4.86127	5.2748	4.91552	5.2304	5.15629	4.79786	5.08117	5.19343	5.10297	4.65086	4.80642	5.10373	4.95853	4.48932	4.82713	5.00062	4.63461	4.94041	4.99586	4.93445	4.79868	3.84889	5.05844	5.2985	5.36894	5.17479	4.78517	5.3945	4.84335	4.78135	3.9958	5.40199
ENSG00000008952	SEC62	protein_coding	8.16552	7.10177	7.67722	7.1899	7.83003	7.66189	7.81485	7.57766	7.40783	8.07482	6.99486	8.02505	8.50715	7.93066	7.69461	8.13048	7.61396	8.60583	8.21735	7.85269	8.46872	7.44155	7.00239	8.65262	8.90551	8.06199	7.06839	8.19147	8.01583	7.47057	7.90224	6.19102	6.16982	6.02004	7.13588
ENSG00000008988	RPS20	protein_coding	9.69818	9.28451	9.29875	9.32995	8.9756	8.98034	9.61535	9.16161	10.555	9.29963	9.39011	9.22201	9.2711	9.05985	9.27182	9.37127	9.70974	10.3577	9.14592	9.23963	10.0534	9.21298	8.59565	9.56326	8.86326	9.0445	9.39226	9.36357	9.29648	9.99554	9.3181	9.15268	9.93993	10.6554	10.0258
ENSG00000009307	CSDE1	protein_coding	9.84178	9.12332	9.27478	9.15036	9.27487	9.2518	9.46264	9.10348	9.63791	9.82849	9.40906	10.0327	10.0806	9.39184	9.36287	9.77235	8.95705	10.3995	10.0159	9.28605	10.1262	9.09512	10.5449	10.4518	9.00028	9.46127	9.49335	10.0302	9.62069	9.92612	9.68529	8.83787	9.35082	8.61629	9.84617
ENSG00000009335	UBE3C	protein_coding	6.58723	6.57421	6.46878	6.6415	6.07442	6.07523	6.40219	6.01958	6.47774	6.71096	6.37855	6.62002	7.58709	6.93248	6.47212	6.64619	5.87871	7.67333	6.69837	6.4423	6.79473	6.27271	5.97822	7.1048	6.87405	6.59075	6.49069	6.81808	6.7188	6.75486	6.49631	6.28187	6.48486	5.41553	6.78832
ENSG00000009413	REV3L	protein_coding	6.31613	5.52294	6.42446	5.15546	6.21635	5.46104	6.26521	6.08514	5.40932	6.07236	6.36494	6.5797	7.01852	6.93457	6.02769	6.05334	5.52291	6.97535	5.97353	6.19531	6.29229	5.77015	5.57577	6.81724	3.6514	6.26807	5.80951	6.99471	6.33497	6.27321	6.04108	5.6068	5.61424	4.27823	6.06377
ENSG00000009694	TENM1	protein_coding	-0.00710671	0.975034	1.11655	0.421425	0.548491	-0.0416401	0.00719172	0.179168	-0.314127	-0.0323198	0.284219	1.21302	2.02062	0.255996	0.737048	1.70262	0.859101	1.63145	1.45303	1.14904	1.68228	2.29048	-1.31085	1.53464	-3.52046	1.3295	1.14105	1.62137	0.854384	1.20901	1.56496	-1.08849	-2.58804	0.465354	0.329549
ENSG00000009780	FAM76A	protein_coding	4.76247	3.71103	4.36342	3.70441	4.58032	4.02554	3.32327	3.50532	4.40742	4.41061	4.10783	4.17788	4.7387	3.55672	4.03107	4.79376	4.31525	4.94	4.12359	4.39919	4.95951	3.93994	3.10308	4.68175	4.40317	4.66738	4.19189	5.20028	4.22852	4.62276	4.25761	2.36957	2.91508	3.41058	4.63414
ENSG00000009790	TRAF3IP3	protein_coding	2.82043	1.43568	2.01782	2.61847	2.18778	4.34822	1.03053	4.60823	1.92088	1.19266	0.962293	2.35023	1.31068	2.37947	1.81056	0.935494	4.41358	2.40235	2.75919	3.08948	1.66377	4.00767	2.46425	2.69333	2.08952	3.25244	0.893216	1.82208	1.58654	2.13557	2.48413	1.77362	2.95164	3.61041	1.87952
ENSG00000009830	POMT2	protein_coding	3.42951	4.44712	3.34748	3.9027	3.5901	3.4274	3.73729	3.35126	3.77091	3.33597	4.10361	3.73739	4.17195	3.2899	3.92882	3.81985	3.39146	4.61805	3.86107	3.66075	3.96413	3.20426	4.33103	3.89347	3.34411	3.78694	3.86232	3.6276	4.10197	4.29919	3.78626	4.57625	4.41321	4.2245	4.13003
ENSG00000009844	VTA1	protein_coding	5.23987	4.94316	5.41054	5.2832	5.07456	5.45771	5.4856	5.17683	4.8647	5.41221	4.84072	5.34304	6.01855	5.61431	5.2443	5.18962	4.99577	5.99058	5.02408	5.18566	5.33198	5.01981	5.39365	5.7716	5.33783	5.39479	5.08165	5.23336	5.48572	5.39157	5.17462	5.35332	5.43005	5.00767	5.20418
ENSG00000009950	MLXIPL	protein_coding	5.04905	6.7378	4.23171	5.18799	3.74917	1.89136	5.74898	5.17784	6.56159	4.79923	4.85209	6.1583	5.33171	3.78181	5.8933	5.16798	1.25599	7.46526	5.91728	4.92478	6.63642	3.4921	4.74501	5.46269	-0.381229	4.48408	5.9933	5.98644	5.67378	7.21847	6.39701	2.7465	1.80722	4.09167	6.93676
ENSG00000009954	BAZ1B	protein_coding	6.49982	6.78082	6.33712	6.43488	6.43541	6.42815	6.34754	6.43543	6.10959	6.56886	6.58989	6.74076	7.40539	6.75429	6.52126	6.5589	6.04761	7.46625	6.57423	6.35818	6.61309	6.00314	6.41693	7.18264	6.35189	6.50895	6.67618	6.55871	6.54006	6.69243	6.43609	6.61252	6.5479	5.91217	6.74614
ENSG00000010017	RANBP9	protein_coding	6.05306	5.72327	5.65376	4.73356	6.10198	5.42573	5.9568	5.22099	5.71833	6.28152	5.8386	5.89985	6.1997	6.32761	5.55008	5.85412	5.45736	6.58289	5.40124	5.6867	6.10773	5.38733	5.27679	5.85231	4.98938	5.74164	5.51714	5.98345	5.82017	6.00683	5.59053	5.27244	5.63811	4.82938	5.84208
ENSG00000010030	ETV7	protein_coding	1.23114	1.25928	0.956224	1.15428	0.414218	0.434955	1.69295	0.925223	2.12435	1.51163	1.32348	1.55773	0.496198	1.83647	0.796327	-0.810545	1.21691	2.93686	-0.218041	1.66005	0.408382	1.85608	0.832108	0.871023	2.04063	-0.112422	0.76774	-0.484298	2.23087	2.77651	0.333146	1.06969	3.44309	2.43583	2.73268
ENSG00000010072	SPRTN	protein_coding	3.79652	3.05469	3.4713	3.429	3.62091	3.23101	3.08978	3.22681	3.13357	3.61519	2.88567	3.70315	4.56078	3.94358	3.05861	3.3125	3.24376	4.47553	3.30613	3.48775	3.67625	3.41161	2.91361	4.40455	4.03261	3.62755	2.81164	3.60444	3.14781	3.74482	3.02043	3.31487	3.27378	2.65105	3.14156
ENSG00000010165	METTL13	protein_coding	4.17168	4.79531	4.5078	5.05859	4.55661	4.86118	4.51279	4.70471	4.44209	4.48309	4.66989	4.61239	5.47378	4.44915	4.69634	4.6904	4.43927	5.55422	4.87861	4.54537	4.57231	4.16734	5.29588	4.91271	5.74575	4.53529	4.7895	4.54933	4.94695	5.14388	4.50472	5.68821	6.05085	5.47843	5.1488
ENSG00000010219	DYRK4	protein_coding	2.66345	3.78621	2.48995	3.45838	2.43667	4.10846	3.01003	3.0644	3.48346	2.81197	3.07442	2.64297	2.20814	3.088	2.40659	2.13932	3.35143	2.81753	2.31468	2.74146	2.64089	3.22796	3.6639	2.51993	3.16411	3.25681	3.08915	2.19711	2.83654	3.35012	2.47656	3.96588	3.56344	4.27102	3.44543
ENSG00000010244	ZNF207	protein_coding	7.10424	6.91992	6.97925	6.64185	6.82462	6.70623	6.72382	6.54452	7.06022	7.0488	6.62272	6.70515	7.84878	7.3732	6.66237	6.51973	6.59809	8.12987	6.65593	6.97523	6.92286	6.68129	6.53373	7.95547	6.4775	6.81116	6.76197	6.74319	6.9377	7.48108	6.63458	6.77243	7.17611	6.39532	7.0649
ENSG00000010256	UQCRC1	protein_coding	6.06954	6.88615	5.83975	6.92751	5.73953	6.02725	6.20858	5.85095	6.84463	6.05405	5.95509	6.40903	6.08469	6.1422	6.10348	6.07881	5.9872	7.47071	6.00365	6.02051	6.87034	5.78087	6.14242	6.2449	6.70395	6.05027	6.17688	6.21131	6.59765	7.08518	6.46651	6.3855	6.70989	7.28279	7.56217
ENSG00000010270	STARD3NL	protein_coding	5.09369	4.71422	5.05116	4.87102	4.91465	5.11658	4.88032	4.58844	5.60391	5.17873	4.81124	4.92787	5.48108	5.59007	4.60949	5.10908	4.63355	5.21018	4.80069	4.87482	5.1511	5.27333	4.48472	4.96722	4.38174	5.08323	4.67402	5.0739	4.86994	5.42749	4.60363	4.81199	5.24281	4.81623	4.70963
ENSG00000010278	CD9	protein_coding	7.47172	7.23334	8.6377	8.56081	8.16817	8.15119	7.04517	6.0693	7.51801	7.17061	6.77851	6.37076	8.18047	7.57325	6.45918	6.75094	7.77333	6.15098	5.84979	8.15251	6.14157	7.57649	7.83715	6.99793	9.18243	7.55286	6.66054	6.09497	6.38564	7.19547	6.00535	8.67647	8.47529	7.80717	6.55762
ENSG00000010292	NCAPD2	protein_coding	4.56737	5.85424	5.58088	6.75768	5.16619	4.93718	4.76196	5.14279	4.2292	4.88457	5.05706	4.89285	4.04971	5.18972	5.00354	4.55964	4.55738	4.6358	4.6148	4.98003	4.74734	4.99816	6.9634	3.82366	7.10913	5.06218	5.00292	4.98853	4.93875	4.79052	5.00601	7.05953	7.46853	5.14415	5.25649
ENSG00000010295	IFFO1	protein_coding	4.48263	5.7877	3.72562	3.38206	3.97345	5.15302	4.51472	4.58844	5.63754	4.72789	4.87209	4.46123	3.605	4.10101	4.70539	4.7361	5.33153	3.34338	4.5902	4.0102	4.24817	4.52226	3.82278	3.78904	3.04027	4.78538	4.61262	4.46613	4.40565	4.03351	4.81054	2.98698	2.69319	4.43697	4.38814
ENSG00000010310	GIPR	protein_coding	0.755865	1.93873	0.191611	-0.67774	-0.394658	-0.379483	1.6515	0.738944	2.06626	0.334151	1.82199	0.698669	-0.685024	1.85073	1.71138	0.195942	1.17675	1.88991	1.21632	0.0870661	0.862507	0.466348	-0.468349	1.00869	-2.79722	0.209184	1.3081	0.764631	1.08996	0.402539	1.63467	-0.268315	-1.75953	0.654528	0.586532
ENSG00000010318	PHF7	protein_coding	2.06538	2.55024	1.55481	0.833892	1.64445	1.30303	1.88402	0.738944	2.77107	1.78754	2.02318	2.65097	1.6583	1.68551	1.66972	2.5069	1.7004	2.35171	2.07094	1.79258	2.51229	1.68402	0.337807	2.33159	0.0328386	1.5589	2.22676	2.74799	1.83074	2.14674	2.56491	0.165746	1.23871	1.34558	2.77346
ENSG00000010319	SEMA3G	protein_coding	6.08067	7.02626	6.79042	5.07449	5.51435	5.17849	6.13279	5.56035	8.28455	6.73318	7.045	7.66354	6.76499	6.63678	6.50321	7.04679	5.40834	7.65256	8.01149	5.83393	7.48404	4.22931	4.37101	6.93851	2.91568	6.4295	6.26586	7.19306	6.7897	6.92257	6.61961	3.07179	3.69862	3.29212	6.7281
ENSG00000010322	NISCH	protein_coding	6.27796	7.16769	5.76685	5.78318	5.79597	5.78805	5.96669	6.04214	6.74247	6.37542	6.81641	6.4417	6.01729	6.11661	6.19627	6.39871	6.30683	5.99471	6.3092	5.57058	6.33166	5.86891	6.26651	5.97429	4.94225	6.22193	6.63747	6.52981	6.08964	6.29093	6.47271	6.26653	5.17659	6.84262	6.30689
ENSG00000010327	STAB1	protein_coding	6.78211	9.0276	6.97141	5.6747	6.64778	6.2938	7.36717	6.47202	7.64083	8.42701	8.45449	7.69848	8.29795	8.71414	7.43694	7.80908	6.36384	6.79677	8.56822	6.66138	7.30001	7.00191	6.14393	7.55695	5.66822	8.15085	7.49888	7.87406	7.73468	7.75379	8.23561	6.37332	5.14186	7.17393	7.11194
ENSG00000010361	FUZ	protein_coding	4.04102	4.3947	3.35553	2.9844	3.27071	3.31795	4.07959	3.53426	4.3679	3.80227	3.86503	3.79633	3.29313	3.51255	3.8377	3.92073	3.53341	3.86062	3.50173	3.27765	4.37591	2.96203	4.03893	3.45747	4.50939	3.2655	3.56042	3.91795	3.88854	3.32084	3.83149	4.20056	4.89729	4.4498	3.9384
ENSG00000010379	SLC6A13	protein_coding	-2.61867	-2.22129	1.66267	2.20611	0.548491	-4.08843	-3.06094	-1.55671	-1.53309	-2.32064	-1.46944	-2.96235	-3.11898	-2.94625	-2.332	-1.66898	-2.4233	-2.05199	-1.83787	-0.722358	-1.5345	-2.24183	-0.241687	-1.87606	-0.3289	-2.29932	-3.67811	-4.08843	-3.50738	-4.08843	-2.28459	1.09307	0.235203	1.12874	-1.71883
ENSG00000010404	IDS	protein_coding	7.84663	7.25519	7.4543	6.82189	7.64717	7.74982	7.08269	7.29544	7.35068	7.64353	7.41854	7.71528	8.04459	7.63661	7.19844	7.72614	7.79422	7.7413	7.23016	7.82954	7.66973	7.84006	6.88362	7.94461	7.79426	7.77757	7.37106	7.67517	7.20445	7.51513	7.25953	6.65142	5.93594	6.77924	7.19818
ENSG00000010438	PRSS3	protein_coding	-2.96421	-2.51018	-1.31881	2.85289	-0.346178	-3.57109	-3.48508	-2.88407	-2.11507	-2.94919	-2.89573	-4.08843	-4.08843	-4.08843	-2.71786	-3.46203	-1.99855	-4.08843	-3.53278	0.315738	-2.83016	-1.93074	-0.570024	-4.08843	-1.80761	-2.78181	-2.68521	-3.00706	-3.0943	-4.08843	-3.09089	0.664163	-0.191006	1.06347	-1.59501
ENSG00000010539	ZNF200	protein_coding	2.60709	2.1684	2.98671	2.25158	2.91563	3.09636	2.60213	3.02418	3.73408	2.31389	2.68551	3.1963	3.81586	3.41034	2.82713	2.88946	3.02367	4.30854	2.7533	3.19862	3.13324	3.00838	3.21047	3.98807	3.37599	3.32491	2.89277	3.06315	2.84827	3.598	2.72687	2.7465	3.09288	2.77854	3.1897
ENSG00000010610	CD4	protein_coding	5.99227	7.07662	5.21956	6.00904	5.67932	7.74045	6.27263	6.23805	6.96938	7.28327	6.74332	6.86513	6.62875	7.53732	5.31441	5.90503	5.87715	5.53165	6.0368	6.02321	5.45819	7.13867	5.71534	5.79002	6.3097	7.05778	6.17147	6.27013	6.09457	6.27321	5.82104	5.71153	5.19449	6.52725	5.99647
ENSG00000010626	LRRC23	protein_coding	2.65553	2.69599	2.06773	2.22902	2.23635	2.16043	1.96521	1.87283	2.99514	2.18525	2.64541	2.02014	2.09858	2.07382	2.0157	2.17038	2.16815	2.51404	1.76582	2.27281	2.31289	2.05466	2.66779	1.93084	2.53294	1.71931	2.35772	1.8486	1.9768	2.46483	1.98354	2.68629	3.12524	4.03037	2.72676
ENSG00000010671	BTK	protein_coding	3.2727	3.58101	2.59579	3.24265	3.10188	5.19157	3.16535	4.13052	2.79511	4.01909	3.12112	4.01992	2.56467	4.04008	2.68275	2.77959	3.6735	2.22613	2.90994	3.09975	2.4703	4.47683	2.85597	2.8172	3.20462	4.3081	2.92251	3.46569	3.16198	2.74747	3.52506	2.72421	2.65922	3.31567	2.59645
ENSG00000010704	HFE	protein_coding	4.5332	4.65528	3.6192	3.2797	3.99713	5.18354	4.60976	3.97508	4.25976	4.84253	4.14529	4.50385	4.65409	5.07443	4.11107	4.82988	3.95158	3.71462	4.59185	3.80582	4.47214	4.6329	2.73328	4.07163	3.16411	4.59166	3.91136	4.89619	4.63115	3.8304	4.45549	2.5366	3.27698	3.05527	3.63439
ENSG00000010803	SCMH1	protein_coding	5.08045	5.60251	4.99681	4.25872	4.65962	4.36607	4.92883	4.62924	5.5431	5.1315	5.63789	5.56795	5.18307	4.93246	4.99513	5.11175	5.03281	5.8683	5.31878	4.96466	5.46889	4.5771	6.68966	5.48154	4.76248	4.87612	5.51592	5.31052	5.28353	5.88044	5.27298	4.32425	4.80152	4.48761	5.92069
ENSG00000010810	FYN	protein_coding	6.83434	7.09317	6.38711	5.28229	6.44189	6.21966	6.80797	6.29127	7.08602	6.63705	7.03837	6.66173	6.72099	7.08655	6.40586	6.54118	6.48854	6.65342	6.2591	6.9591	6.56527	6.56206	5.73479	6.45723	4.3837	6.65127	6.48665	6.62542	6.64339	7.04622	6.41197	4.66374	4.64788	5.65866	6.1685
ENSG00000010818	HIVEP2	protein_coding	6.57993	6.03464	6.31042	4.74553	6.3063	5.38167	5.09394	5.51108	4.73089	5.9881	5.72155	6.57392	7.91592	7.59697	5.36097	5.38102	5.60749	7.78887	5.57512	6.67432	6.28549	5.24651	5.48442	8.06014	5.07805	5.40564	5.84003	5.1743	5.27486	7.12489	5.52963	5.5812	6.19756	4.68857	5.74216
ENSG00000010932	FMO1	protein_coding	3.81441	4.42115	1.96613	1.23195	2.0766	4.34282	4.59344	3.38342	4.02582	3.18714	4.09087	2.28998	3.24251	5.79018	4.5156	3.62059	4.51572	1.68698	3.71701	3.4641	2.4703	2.89454	1.03619	3.69017	2.33632	4.22367	3.19042	4.13281	4.15487	3.31591	3.19209	3.17946	0.432016	1.79756	2.31006
ENSG00000011007	TCEB3	protein_coding	5.9661	5.4516	6.17696	5.46229	5.58559	5.4955	5.95893	5.42958	6.20465	5.89089	5.69373	6.15197	7.41447	6.54218	5.75197	5.51915	5.36654	7.5566	5.77391	6.13105	6.2417	5.32552	4.98574	6.88884	6.00534	5.62999	6.03942	5.81547	5.9773	6.87805	5.77162	5.04486	5.8833	5.37463	6.52174
ENSG00000011009	LYPLA2	protein_coding	4.3417	5.21967	5.72002	4.93629	4.5582	5.05189	4.56396	4.44346	5.86466	4.4034	4.30644	4.43365	4.92675	5.05609	4.28498	4.4394	4.72168	5.52975	4.5311	4.59885	4.82228	4.17346	5.42702	4.729	5.80623	4.51902	4.44726	3.97021	4.52372	5.26921	4.21955	5.68869	6.40583	6.97533	4.98359
ENSG00000011021	CLCN6	protein_coding	4.5589	4.58684	4.29384	3.95632	4.39844	4.79157	4.58979	4.34891	4.86754	4.23758	4.95411	4.68047	4.60819	4.20736	4.74855	4.63766	4.45615	4.93714	4.69236	4.12024	4.67293	3.98235	4.05823	4.35161	3.231	4.65751	4.69787	4.94463	4.50717	4.73057	4.77703	4.11607	3.83965	3.76553	5.04555
ENSG00000011028	MRC2	protein_coding	7.70563	9.67747	7.16352	6.24419	7.8259	8.41867	6.46036	8.01376	7.08906	7.43449	8.04935	7.1845	8.63016	7.13287	7.97954	7.86197	8.70306	6.36825	6.92349	7.90341	6.92286	7.32805	7.43726	7.26281	8.24789	8.71638	7.81025	8.02595	7.10927	7.15665	6.92798	6.78145	6.14417	8.54883	6.79894
ENSG00000011052	NME2	protein_coding	1.35366	2.74706	0.361287	1.86945	0.414218	0.231907	1.44057	1.00087	2.04637	2.09263	0.845779	2.50843	0.980905	0.663978	1.99898	2.8062	3.26308	2.08856	3.10779	3.27312	3.43014	0.355977	2.91361	0.718822	2.30355	2.09577	2.04264	1.10981	3.10446	4.17655	2.2196	2.47565	2.28571	4.61834	3.07786
ENSG00000011105	TSPAN9	protein_coding	6.00557	6.71981	6.21731	5.71584	6.07886	5.78739	5.64897	6.07314	6.87032	5.82495	6.34853	5.96873	6.37734	6.40334	5.85722	6.29095	6.16582	5.88769	6.38458	6.05061	6.04117	5.52839	6.17618	5.89067	5.57688	6.16618	5.82731	6.22086	5.72398	6.39467	5.63373	6.71872	5.27602	6.83856	6.11057
ENSG00000011114	BTBD7	protein_coding	5.12414	5.24357	5.28642	5.22075	5.46935	5.38867	5.45882	5.21207	4.68016	5.41221	5.14803	5.46499	6.17742	5.47164	5.59737	5.36097	5.07439	6.13609	5.33368	5.43418	5.65846	4.96564	5.34995	6.10157	4.18434	5.51171	5.27058	5.34586	5.22288	5.4547	5.46029	5.3375	4.97826	4.24181	5.33546
ENSG00000011132	APBA3	protein_coding	2.876	4.13514	2.49725	2.50415	2.73589	3.26946	3.06894	3.25412	3.64429	3.02117	3.39779	3.04045	2.839	2.84606	2.83186	2.93237	3.48489	3.32599	3.11701	2.84277	3.17958	2.83406	3.61262	2.90799	3.31563	3.09071	3.09242	3.01713	2.8068	3.65385	2.84333	2.93618	3.6818	3.85182	3.43094
ENSG00000011143	MKS1	protein_coding	2.77729	3.60889	2.44534	2.06041	3.13214	2.80858	3.23248	2.84076	3.4153	2.69871	3.17444	2.87258	1.89517	2.39901	2.80324	2.59349	2.96002	2.74088	2.59083	2.4914	3.28629	2.75472	3.84764	1.96508	3.85173	2.57272	3.07928	2.81004	3.22631	2.71783	3.00998	3.98006	3.98193	4.69577	3.23212
ENSG00000011198	ABHD5	protein_coding	5.30459	5.04361	4.61238	3.34408	4.80086	3.4808	5.88037	4.11996	6.08908	5.73972	4.76921	6.53443	6.19194	5.28732	5.66586	5.59456	2.65111	7.70309	6.02216	5.63555	6.92383	4.08756	3.68337	6.68013	3.09875	5.17602	5.60402	5.94018	5.8142	6.87805	6.07031	2.87343	2.10278	2.62112	6.02026
ENSG00000011201	KAL1	protein_coding	5.73107	5.80286	4.72863	4.14284	5.58793	4.10421	5.68708	5.29047	3.56262	5.50609	4.65554	5.10588	5.0545	5.3639	5.11736	4.5752	3.42185	4.6358	3.51225	4.32014	4.68215	5.1578	4.84469	4.23253	3.48597	5.41152	4.8145	5.04122	5.19445	3.6222	5.23534	4.38352	2.15944	4.48968	3.87557
ENSG00000011243	AKAP8L	protein_coding	5.09516	5.5603	5.16214	4.8128	5.07233	4.52862	4.36249	4.72716	4.87883	4.66496	5.20136	4.75293	5.18307	4.7236	4.59147	4.56549	5.22846	5.09173	4.83879	4.76939	4.73852	4.56165	5.9348	5.04129	5.16614	4.52084	4.6149	4.94924	4.45443	5.19452	4.70756	5.275	6.18013	6.6784	5.22218
ENSG00000011258	MBTD1	protein_coding	4.49821	3.91461	4.35942	3.90032	4.95511	4.51268	5.31469	4.77238	3.84763	4.71824	4.75312	4.62464	4.45361	4.13928	4.83237	4.58483	4.35178	4.72803	4.3099	4.43411	4.54475	4.53498	4.81978	4.29442	4.38566	4.54602	4.21009	5.20285	4.64803	3.83731	5.01519	5.38504	5.28321	3.37516	4.43247
ENSG00000011260	UTP18	protein_coding	4.56314	3.98012	4.64562	4.57865	4.84198	5.10068	4.24896	4.27084	4.08064	4.50347	4.34987	4.11849	6.23249	5.12665	4.10131	4.2045	4.41141	6.07496	4.01933	5.0426	4.32086	4.67804	4.40323	5.93812	5.73964	4.3516	4.578	3.93352	4.26617	5.35353	3.97007	5.19758	5.25992	4.95316	5.06093
ENSG00000011275	RNF216	protein_coding	5.40954	6.11703	5.34931	5.2293	5.4229	5.4955	5.52152	5.36036	5.16602	5.57938	5.9225	5.48864	5.95317	5.3861	5.54864	5.60597	5.58177	6.05135	5.50754	5.45533	5.39366	5.42112	5.28227	5.5508	5.29991	5.54688	5.76352	5.49287	5.5053	5.57115	5.37528	5.91502	5.36001	5.25061	5.91939
ENSG00000011295	TTC19	protein_coding	5.1955	4.53693	5.09994	4.93513	4.88196	4.62368	5.13085	4.46699	5.51985	4.97166	5.22196	4.96045	5.58799	5.56109	5.27935	5.18202	4.84214	6.11093	4.92657	5.10766	5.32464	4.84441	6.52374	5.58515	4.98422	4.9153	5.12147	4.92763	5.29964	5.85344	4.99014	4.47867	5.35091	5.17666	5.72444
ENSG00000011304	PTBP1	protein_coding	7.55016	7.71193	7.47594	6.92459	7.106	6.77732	6.85095	6.76192	7.86677	7.23939	7.25565	7.4712	8.56558	7.95665	6.91588	7.11357	7.05875	8.94188	6.95755	7.33908	7.54852	6.91699	7.22718	8.41608	7.51778	7.12259	7.17321	7.02373	7.13403	8.24376	6.67856	7.72605	8.00446	7.19948	7.53044
ENSG00000011347	SYT7	protein_coding	3.17083	4.30949	2.73819	1.49401	3.47001	4.02329	3.31444	3.05556	4.17068	3.41459	3.9213	3.02205	3.94808	3.60799	3.39538	3.54359	3.43893	2.95959	3.23597	3.46807	3.11291	3.23187	2.77016	2.94277	4.79527	3.76566	3.21467	3.85393	2.76409	2.55976	2.49167	4.38588	2.12429	2.21318	2.70885
ENSG00000011376	LARS2	protein_coding	3.62871	4.25466	3.6192	4.33639	3.5618	3.80251	4.0586	3.49555	3.58348	3.64403	3.76431	3.7449	3.98447	3.62053	3.56972	3.02025	3.25827	4.28174	3.95399	2.94315	3.70369	3.48883	4.12278	3.63098	4.10335	3.79896	3.84301	3.87988	4.33863	3.51428	3.80149	4.40352	4.2319	4.05016	4.0564
ENSG00000011405	PIK3C2A	protein_coding	7.26185	5.77545	7.04052	6.89624	6.87406	6.11694	6.5505	6.00473	5.36182	7.09653	6.57586	6.98952	7.93132	7.42177	6.43995	6.67716	6.06628	7.77252	7.11099	6.73406	6.96363	6.1684	6.24842	7.5916	5.54481	6.86003	6.29138	7.49014	6.72238	6.49854	6.42531	5.61389	4.95344	3.86145	6.42404
ENSG00000011422	PLAUR	protein_coding	6.50864	6.00084	5.14945	3.77358	5.01201	5.33983	3.69371	3.17059	7.11735	5.99611	5.2307	7.44726	7.2427	7.80674	3.83062	6.37835	4.61863	6.15344	3.61988	5.54731	7.06982	4.46525	4.17282	6.77122	5.43938	6.12916	3.90578	5.51684	4.52372	6.82734	2.68148	5.69539	4.1968	5.79056	3.62169
ENSG00000011426	ANLN	protein_coding	3.77475	4.727	3.04268	5.84382	2.00365	1.81024	2.4573	2.8356	0.337014	2.24025	2.16771	1.10058	1.93821	4.48388	3.31995	1.73068	1.19697	-0.0430201	0.847014	1.43519	0.218509	1.9822	3.85256	0.32086	4.39152	2.79907	0.784034	2.06763	1.91122	1.07517	2.15464	5.28962	5.40317	0.821747	0.420392
ENSG00000011451	WIZ	protein_coding	5.34946	6.48551	5.54169	4.69156	5.41677	4.75275	5.47277	4.88897	6.02063	5.33976	5.74682	5.80167	6.43576	5.62161	5.32619	5.29085	4.95033	6.69464	5.76147	5.35707	5.63727	4.78574	5.53273	6.36568	5.80623	5.23584	5.8723	5.57756	5.68854	6.45822	5.41742	6.00827	5.98967	6.1224	6.26205
ENSG00000011454	RABGAP1	protein_coding	6.34473	5.88876	6.3427	5.25929	6.1466	5.75253	6.15273	5.73459	6.00912	6.4438	6.34808	6.1576	6.23141	5.93108	6.1492	6.28859	5.79329	6.24532	6.11477	5.70951	6.10859	5.5442	6.40106	5.87124	6.1192	5.97808	6.24431	6.46807	6.06724	5.96723	5.9318	5.61086	5.36076	5.61472	6.62324
ENSG00000011465	DCN	protein_coding	11.8179	11.6527	11.0512	9.78577	11.6337	11.8839	10.5609	11.3598	11.5749	11.6373	11.7743	11.1346	12.4129	11.2834	11.5959	12.0556	11.941	10.6079	10.7322	11.5303	11.592	11.1177	9.87553	11.3236	9.44942	12.1133	11.6334	12.1238	11.121	11.3383	11.1005	9.49222	8.64051	10.9498	11.0019
ENSG00000011478	QPCTL	protein_coding	2.75523	3.12072	3.35151	2.81805	2.47765	2.26306	2.2873	2.46682	2.74662	2.34434	2.27674	2.18361	2.19045	2.57254	2.18791	2.05306	2.63637	2.65994	1.3936	2.4678	2.41603	2.02791	3.3734	1.99852	4.52369	2.39404	2.25041	2.02175	2.22188	2.40099	2.00476	3.48578	3.97603	3.03838	2.70283
ENSG00000011485	PPP5C	protein_coding	5.18729	5.4231	5.2107	4.33111	5.14515	4.37491	4.65766	4.36689	5.66389	5.03991	5.24323	4.63275	5.30934	5.05609	4.87424	4.86511	5.01155	5.59289	4.96024	4.73192	4.79914	4.6723	5.32007	4.67659	6.18028	4.88461	4.98189	4.87215	4.95376	5.62403	4.4497	5.90762	6.29285	4.94865	5.73554
ENSG00000011523	CEP68	protein_coding	5.70637	5.60367	5.91188	5.13033	5.80203	5.47344	6.13341	5.70308	5.75863	5.76619	6.12408	5.85203	5.31751	5.53373	5.9285	6.27436	5.60371	6.05267	6.18162	5.52938	6.1315	5.27523	5.64689	5.34846	4.53432	6.05027	5.72606	6.21259	5.67543	5.15221	6.15932	5.03584	4.82141	4.65018	5.78553
ENSG00000011566	MAP4K3	protein_coding	5.40128	4.4701	5.24797	4.96842	6.03778	4.95262	5.29688	4.97355	4.57993	5.01489	5.22098	5.34674	6.26349	5.1045	4.98667	5.69767	5.02717	6.82953	5.6713	5.24702	5.6061	5.10226	5.65254	6.43704	4.51477	5.19662	4.94432	5.64058	5.37859	5.1072	5.02301	5.28835	4.50352	3.97228	5.0981
ENSG00000011590	ZBTB32	protein_coding	0.59956	-2.51018	-1.95271	-2.11307	-1.53643	-1.67886	-3.06094	-0.0689634	-4.08843	-2.94919	-2.6478	-2.61648	-1.14232	-1.88009	-1.8969	-1.99682	0.859101	-0.0430201	-2.15523	0.00201013	-1.22758	-1.02548	-2.45999	-1.34188	-3.52046	-1.93838	-3.35902	-2.16618	-3.0943	-0.897828	-2.09212	-2.79079	-1.75953	-0.321348	-2.83182
ENSG00000011600	TYROBP	protein_coding	5.46723	6.55344	5.03369	5.57016	5.00268	7.95568	5.5196	5.34774	6.69614	6.79005	5.70213	6.46289	6.19416	7.07596	4.83355	5.60313	6.38327	5.60556	5.70759	5.59256	5.61336	7.19261	5.01016	6.00615	5.50392	7.02072	5.09151	5.86341	6.07099	5.86362	5.29252	4.77633	4.81039	6.66929	5.26059
ENSG00000011638	TMEM159	protein_coding	4.9538	5.28736	4.28543	3.86663	4.85888	5.40775	4.94893	4.97238	4.89003	5.20108	4.96113	4.31521	3.80427	4.13345	4.90374	5.03928	5.44895	3.58907	5.27931	4.07671	4.86342	4.69656	3.81272	4.38361	4.96076	5.06716	4.44598	5.23838	4.32191	4.11535	4.74271	3.43179	3.20815	4.52647	4.49128
ENSG00000011677	GABRA3	protein_coding	-4.08843	-2.51018	-0.085449	0.619408	-3.17429	-4.08843	-3.48508	-1.01954	-4.08843	-4.08843	-4.08843	-4.08843	-3.11898	-2.59749	-2.71786	-2.19369	-0.895787	-1.046	-2.15523	-2.24593	-3.32625	-4.08843	-0.28426	-4.08843	-1.32516	-3.51195	-3.09787	-4.08843	-3.0943	-3.42786	-4.08843	-1.74271	2.21396	1.39947	-3.53939
ENSG00000012048	BRCA1	protein_coding	2.30695	3.15264	2.16264	3.57625	1.97532	2.22445	1.73324	2.51922	1.49139	2.05631	2.30644	2.34036	2.67056	2.74279	2.04858	2.73872	1.19697	2.02534	2.61705	1.98216	2.82709	1.56502	3.75869	2.19402	4.7243	2.89179	2.22676	2.6905	2.16675	1.95682	2.57204	3.08934	4.55194	1.41699	1.26304
ENSG00000012061	ERCC1	protein_coding	5.53892	5.83862	5.32181	4.59049	5.3631	5.33621	5.14212	4.97003	6.03837	5.3498	5.37607	4.81125	6.25288	5.4751	5.0721	5.13293	5.84547	6.20071	4.96279	5.61601	5.60731	5.33827	4.83478	6.24954	5.73504	5.45775	5.29068	5.04696	5.08346	5.79875	4.80753	5.70158	6.17025	6.17613	5.56766
ENSG00000012124	CD22	protein_coding	3.68035	1.08498	2.08721	1.96354	2.26003	4.46545	0.718947	4.53537	1.00626	1.32068	0.426239	0.845437	0.0232458	1.1979	1.55997	0.911181	3.84989	1.20663	2.71132	2.66744	0.452187	3.82033	2.08392	-0.515172	4.12461	2.32089	1.86255	1.8486	-1.01134	0.544365	1.89541	3.88448	3.44023	4.31608	1.40328
ENSG00000012171	SEMA3B	processed_transcript	6.58411	7.6459	5.19169	5.67678	4.61746	5.01277	6.20917	5.34864	6.74633	6.59705	6.97478	5.77993	6.40924	5.77344	6.14825	6.47118	4.66474	4.99053	5.80203	4.4422	6.14324	4.61204	4.11461	6.85539	4.98163	5.81377	6.85769	6.39629	5.81645	5.78095	6.14804	4.5213	5.64866	5.74965	6.45571
ENSG00000012174	MBTPS2	protein_coding	5.32345	4.65528	4.75932	4.92464	5.05552	4.55064	5.30803	4.67759	3.97411	5.3672	4.63081	5.05248	5.0931	5.2407	5.1678	4.98498	4.33819	5.56908	5.00683	4.75322	5.2001	4.8108	4.99355	4.91563	4.75796	5.12202	4.90668	5.46956	5.45057	4.69488	5.00995	4.14152	3.87392	3.62933	5.13321
ENSG00000012211	PRICKLE3	protein_coding	2.36637	3.28525	4.17137	3.36837	2.38735	2.78224	2.20374	2.69464	3.368	1.87355	2.78906	2.70581	3.17214	2.38927	2.78385	2.73872	2.47185	3.35199	2.77092	2.72164	3.13995	1.69539	3.06118	2.87236	3.96085	2.36199	2.79967	2.31593	2.46217	3.27579	2.52875	4.06969	2.79505	3.91176	3.11913
ENSG00000012223	LTF	protein_coding	3.48865	3.38536	2.32738	2.21379	1.78167	0.682946	5.7965	3.53743	3.94217	2.38396	2.92927	2.74374	4.34984	8.15232	3.07466	2.78629	2.39515	2.7277	4.12815	2.2267	3.33974	3.99161	1.07038	2.24135	-0.550669	1.66779	1.11552	1.96227	5.21157	4.1323	2.57913	3.30739	-0.191006	3.62557	1.31132
ENSG00000012232	EXTL3	protein_coding	5.90312	6.34132	5.07331	5.87926	5.07567	5.13231	6.02939	5.32584	5.84896	6.15769	6.60677	5.78722	5.52055	5.96752	6.00431	5.48764	5.36989	5.75919	5.46847	5.41888	5.54546	4.59544	5.59351	5.43038	6.07315	5.4203	6.50304	5.76502	6.09642	5.67312	5.71643	4.78712	5.05773	5.02635	6.23779
ENSG00000012660	ELOVL5	protein_coding	8.32051	7.53675	7.26914	5.64092	7.33346	6.57695	7.33943	6.99224	7.817	7.67556	7.11196	8.90385	9.7044	8.79104	7.67977	7.88107	6.26553	10.3352	8.43169	7.91017	9.03003	6.87352	6.04046	9.42956	6.07011	7.75595	8.15315	8.21842	8.70626	8.98813	7.97778	6.07069	5.10086	5.26761	8.20177
ENSG00000012779	ALOX5	protein_coding	3.4202	4.43419	3.76548	4.17466	4.15071	4.54438	4.34526	3.89803	3.61758	5.14309	3.80389	4.54739	4.61152	5.55675	2.98833	3.24114	4.16166	4.16925	4.22295	4.53784	3.15328	5.13187	3.56245	5.10665	4.60999	4.4878	3.83912	4.29588	4.75937	4.17109	4.08906	4.56375	3.615	4.57216	3.67185
ENSG00000012822	CALCOCO1	protein_coding	7.29758	7.60092	6.25979	5.69747	6.62896	6.2938	7.51965	6.58195	7.74709	7.59688	7.75121	7.40291	6.99642	7.09855	7.0026	7.10288	6.36048	7.66255	6.99708	6.42198	7.61688	6.16635	6.32919	7.04404	4.78046	6.58468	7.60845	7.38138	6.96792	7.82415	7.33292	5.93456	5.92322	6.87111	7.98636
ENSG00000012963	UBR7	protein_coding	5.14267	5.15022	5.05487	4.87587	5.20331	5.32622	5.04942	5.15629	5.20018	5.17309	5.06468	5.14184	5.39873	5.15853	5.04486	5.19844	5.24555	5.88175	4.81633	5.13538	5.2097	5.15574	5.12646	5.33325	4.9868	5.22919	5.17805	5.01658	4.98065	5.54818	4.95379	4.9584	4.77343	4.76583	5.6474
ENSG00000012983	MAP4K5	protein_coding	6.30542	5.57333	6.05854	5.38448	6.37749	5.50117	5.78377	5.58361	4.95015	6.04713	5.87498	5.72695	7.08944	6.29343	5.7451	5.93247	5.9966	7.05071	5.59834	6.39304	5.82391	5.60202	5.68739	6.95315	4.55883	6.05215	5.52625	6.46003	5.80069	5.91513	5.41445	5.02904	5.37728	4.91358	5.97353
ENSG00000013016	EHD3	protein_coding	3.90737	4.25172	2.97106	3.72873	4.36789	3.9013	3.02634	3.63564	3.34375	3.38561	3.73731	2.68256	3.39705	3.80762	3.3132	3.18648	4.49137	2.45128	3.5871	4.05047	2.14954	3.32637	3.90324	2.23201	4.09858	3.82271	3.68061	2.90787	3.10934	3.34042	2.83743	4.46417	3.78218	4.17643	3.12365
ENSG00000013275	PSMC4	protein_coding	5.49078	5.78057	5.51765	5.94647	5.39108	5.34883	5.00211	4.76833	6.44392	5.22446	5.13257	5.53047	6.83925	5.99587	4.93045	5.15897	5.08121	6.71482	5.46216	5.49575	5.87006	5.12452	5.34995	6.56579	6.73808	5.26971	5.22655	5.01511	5.46968	6.43165	4.82553	6.3453	6.99801	5.86267	5.8214
ENSG00000013288	MAN2B2	protein_coding	5.77285	6.5877	5.26519	4.86859	5.5809	6.25505	5.81539	5.36573	6.26829	6.43734	6.13705	6.26192	6.04463	6.21911	5.81245	6.24366	5.85584	5.92858	6.27205	5.42604	5.76108	5.7216	4.81727	5.9025	5.68422	6.274	6.37039	5.91059	5.86416	6.20275	5.79083	5.70727	4.98121	5.42313	6.23101
ENSG00000013297	CLDN11	protein_coding	6.86685	6.11622	5.6332	3.95403	6.29392	5.11553	6.38544	6.27898	5.04593	7.05802	6.42455	4.422	6.05077	5.9552	6.24849	6.05334	5.06066	3.39431	5.48814	5.08716	4.2008	5.70199	6.53603	4.46162	3.79095	5.59766	5.37646	6.37762	5.64634	3.03868	5.68062	4.22325	4.42481	5.49812	5.32079
ENSG00000013306	SLC25A39	protein_coding	5.33837	6.36263	5.59372	6.34727	5.56752	5.23106	5.25943	5.08638	6.60389	5.30277	5.54518	5.5119	5.59641	5.33248	5.12026	5.25869	5.31543	6.48054	5.45309	5.21076	5.73914	5.31265	6.0116	5.83004	7.91834	5.41445	5.50367	5.22579	5.52827	6.33002	5.31499	6.36434	7.47518	6.99114	6.23258
ENSG00000013364	MVP	protein_coding	6.83828	7.79188	6.78894	6.11124	6.40696	6.88893	7.05646	6.37362	7.29592	7.08569	7.05542	6.92454	7.19802	7.37813	6.49615	6.74364	6.55517	6.8608	6.5591	6.54076	6.30204	6.37309	6.12219	6.88884	6.61325	6.67958	7.03218	6.60271	7.21666	7.11604	6.3038	6.7159	6.67175	7.60341	7.29114
ENSG00000013374	NUB1	protein_coding	5.90228	6.00871	5.97405	5.66493	5.57462	5.72928	6.13905	5.88629	6.18772	5.9695	5.99439	6.35981	5.9307	5.77344	5.84147	6.1304	5.7833	6.96415	6.15949	5.81145	6.4115	5.81517	5.56082	6.30405	6.36684	5.90558	6.02492	6.06347	6.08035	6.35069	6.00073	5.69825	6.37252	5.89976	6.44718
ENSG00000013375	PGM3	protein_coding	5.58447	5.98053	5.32078	4.4529	5.54921	5.10918	6.22927	5.28953	5.66225	5.80228	5.19839	6.11482	6.84279	6.55911	6.37905	5.62665	5.17467	8.02973	5.77899	6.18631	6.82264	5.12242	4.97111	7.17321	4.58634	5.98928	5.96812	5.72978	6.22681	6.96063	5.8499	5.02144	4.96541	4.87922	5.94193
ENSG00000013392	RWDD2A	protein_coding	2.7478	3.54779	2.51175	2.46608	2.79653	2.69455	3.56939	3.04666	2.96367	2.88972	2.99458	3.43293	2.69586	2.87426	3.70992	3.2066	2.99509	4.96549	3.41099	3.15003	4.16834	2.72172	3.00041	3.5506	2.35244	3.01543	3.99423	3.34513	3.49978	4.14627	3.35376	2.66305	2.47618	3.20905	3.30943
ENSG00000013441	CLK1	protein_coding	7.37135	5.4631	6.38416	5.33517	6.54148	6.44378	6.49495	6.48031	7.13864	6.52523	7.15212	5.92813	6.20632	6.6103	6.37257	6.45288	6.75892	6.6569	6.48141	6.12226	6.65353	6.0811	5.08733	6.99137	5.28529	6.54464	6.68298	6.98016	6.58325	6.60153	6.5255	4.85707	5.77472	6.40852	7.40814
ENSG00000013503	POLR3B	protein_coding	2.73283	3.25616	2.822	4.1185	3.05301	3.19951	3.5165	3.20299	2.80698	3.26877	3.60316	3.19082	3.33399	3.24741	3.44561	3.32175	2.8996	3.94276	3.55016	2.72828	3.53571	2.5317	3.21811	3.07927	3.22664	3.19447	4.00296	2.76201	3.83355	3.11456	3.36201	3.72715	4.0879	3.34343	3.51235
ENSG00000013523	ANGEL1	protein_coding	4.04102	4.76259	4.52933	4.48339	4.42662	5.06615	4.25589	4.25933	4.38384	4.44613	4.79038	4.34265	4.2207	4.25371	4.26938	4.39626	4.44351	4.31296	4.81067	4.22012	4.26668	4.42993	4.65211	3.89938	3.29493	4.62918	4.57683	4.23938	4.40168	3.98457	4.31818	4.52882	4.58334	4.50205	4.53598
ENSG00000013561	RNF14	protein_coding	5.71592	5.34098	5.49412	5.21789	5.31681	5.77141	5.65423	5.46591	5.87033	5.90287	5.40209	5.76341	5.97787	5.45306	5.61326	5.90887	5.39417	6.51067	6.22061	5.6496	5.92744	5.60277	4.53609	6.11052	5.76168	5.99059	5.50428	6.36677	5.95103	5.78453	6.07407	4.59683	5.21802	4.76069	5.96412
ENSG00000013563	DNASE1L1	protein_coding	4.80066	5.4516	4.57836	4.69293	4.36425	5.31799	4.71746	4.29921	5.29806	5.42176	5.10959	5.18797	4.86117	5.33502	4.09935	4.97475	4.52375	4.61805	4.94996	4.2778	4.19759	4.96681	4.05396	5.18257	5.45998	4.89164	4.64755	4.73849	4.60028	5.18643	4.47842	4.32548	3.81562	5.0602	5.32472
ENSG00000013573	DDX11	protein_coding	4.09178	4.30097	4.45815	4.65959	3.54904	3.29204	3.35804	3.58737	3.51275	3.18153	3.88731	3.38093	3.12635	2.82455	3.52661	3.36715	3.86576	3.91977	3.88014	3.15988	3.80852	3.44232	5.34123	2.82964	4.89077	3.24367	3.58852	3.25382	1.61428	3.60611	3.47273	4.53843	4.98023	4.77605	4.10742
ENSG00000013583	HEBP1	protein_coding	5.64671	5.74122	5.26946	4.75477	4.93564	5.60552	5.3615	4.92704	6.65404	5.74067	5.84051	5.16439	5.18754	5.55457	5.41634	5.5131	5.46884	5.51064	5.81907	4.96887	6.02222	4.97617	4.83478	5.42629	4.32979	5.27402	5.54966	5.65192	5.55893	5.78988	5.39148	4.80227	5.52339	5.53169	5.70726
ENSG00000013588	GPRC5A	protein_coding	8.1043	6.78642	7.40565	4.40507	6.49109	4.31553	5.78377	4.1431	7.85752	7.82405	6.52822	8.6158	9.62276	9.2318	5.79742	7.36559	4.91719	7.79125	4.07003	7.56183	8.15752	4.88844	2.72794	9.61483	4.82733	6.78986	5.85312	6.23789	4.53827	8.45441	3.299	5.03433	5.27442	4.26619	4.92274
ENSG00000013619	MAMLD1	protein_coding	3.37751	3.17146	4.1553	3.00667	3.4734	2.60118	2.79212	2.61261	4.05598	3.1474	3.52322	3.67986	4.97147	3.47161	3.35979	3.12438	2.83009	5.8728	4.45684	4.40748	3.66233	3.12234	2.35059	4.60602	2.2005	3.11496	3.19956	3.65415	3.01363	4.68535	2.91792	2.14192	1.30299	1.74302	4.45949
ENSG00000013725	CD6	protein_coding	3.83559	2.46129	2.34368	2.65277	2.85989	4.16461	1.99865	4.22622	2.75889	2.69084	1.81167	2.87941	2.50866	1.87884	1.44119	1.71672	4.14354	3.38595	2.32267	3.88218	1.75404	4.55229	2.74391	2.41651	2.21819	3.57259	1.72585	1.96227	2.23087	3.24495	2.36614	2.20229	2.84772	3.28736	2.53
ENSG00000013810	TACC3	protein_coding	3.17083	4.74176	3.1392	4.64688	3.04395	3.60323	2.50463	3.87308	3.04612	2.62623	2.55553	3.51856	3.154	4.14218	2.92334	2.91413	3.489	3.68083	3.21895	3.39489	3.05726	3.65537	5.14863	3.63808	6.53951	3.55498	2.61618	3.52855	2.95518	3.08004	3.04111	5.61994	5.65236	4.12937	2.64749
ENSG00000014123	UFL1	protein_coding	5.35558	4.9595	5.17585	4.53027	5.20839	5.42828	5.84327	5.41582	4.55551	5.56329	5.18347	5.49976	5.1537	5.3861	5.46282	5.42355	5.15025	5.83642	5.30574	5.19647	5.66778	5.21623	4.73172	4.97564	4.01247	5.64505	5.25459	5.73956	5.85474	4.90836	5.66071	4.4393	4.84535	4.01607	5.43867
ENSG00000014138	POLA2	protein_coding	2.64757	3.57631	2.39931	3.79932	2.49771	2.93832	2.67289	2.90124	3.14296	2.71434	3.12112	2.85882	1.93821	2.1793	2.81762	2.51499	2.77735	2.74088	2.79408	2.63249	2.32472	2.87466	3.36997	2.3051	4.78492	2.84037	3.08915	2.59973	2.55814	2.79082	2.64817	3.27454	4.2597	3.74832	3.3291
ENSG00000014164	ZC3H3	protein_coding	3.67644	4.93033	4.05495	3.96999	4.09694	3.5386	4.61696	3.43547	3.96354	3.85961	4.36758	3.98551	4.74174	4.07695	3.73539	3.54754	3.97226	5.28406	3.5296	3.83992	3.99036	4.05922	4.26428	4.60783	5.59731	3.66087	4.03904	3.87988	3.65809	4.70813	3.71403	4.68793	3.85045	4.83916	4.86461
ENSG00000014216	CAPN1	protein_coding	6.28631	7.4997	6.3718	7.39841	6.59638	6.58535	6.40063	6.29598	7.07133	6.51968	6.6494	6.40193	6.37244	6.6414	6.16193	6.44866	6.42298	5.93719	6.27822	6.36724	6.3302	6.33359	6.48347	6.06455	8.06779	6.68121	6.44594	6.41693	6.38564	6.55881	6.20128	7.53949	7.84479	7.79088	6.38932
ENSG00000014257	ACPP	protein_coding	-0.410541	1.45629	1.49771	2.52281	0.385796	0.322448	2.16499	-0.519238	-0.661349	2.44142	-0.0502009	1.5406	0.980905	2.1793	0.422777	-0.221255	0.272133	0.417224	-0.0853001	2.06836	-0.330462	0.593404	0.89069	1.54976	3.10827	1.26163	-0.106188	0.586998	1.14805	0.953294	0.929172	0.533556	2.27933	0.563039	-0.0631662
ENSG00000014641	MDH1	protein_coding	6.72933	7.32618	6.16267	6.83781	6.39096	6.71601	6.76853	6.33715	8.044	6.6879	6.52111	6.97165	7.67718	6.54766	6.69875	7.53849	5.96157	8.77573	7.6336	6.40033	7.71257	6.21657	6.44081	7.2833	6.7012	7.3271	7.18245	7.5416	7.12893	7.44253	8.03191	6.71849	7.14554	6.4691	7.58608
ENSG00000014824	SLC30A9	protein_coding	6.06432	5.42048	6.51942	5.72123	6.01997	5.71542	6.0561	5.50865	5.26186	6.21648	5.5248	5.82751	6.06904	6.15015	5.83501	5.83486	5.67573	6.43363	5.41251	5.96401	5.89903	5.83845	6.08922	5.88397	6.57428	6.04712	5.52503	6.11286	6.05147	5.80757	5.76697	5.91297	5.71336	5.24939	5.90374
ENSG00000014914	MTMR11	protein_coding	3.00624	4.84304	2.70073	2.48524	3.59942	4.53652	3.31886	3.87056	3.53433	3.21486	3.9237	3.16309	3.30961	3.01389	3.35323	3.63921	4.67919	1.84179	2.02273	3.39905	2.2018	3.62595	3.75607	2.70688	1.92687	3.90009	3.61381	3.14032	2.21284	3.09164	2.90669	3.69122	2.71698	3.49551	2.60938
ENSG00000014919	COX15	protein_coding	5.13983	5.09379	4.59036	5.7466	4.59591	4.81775	5.40059	4.85752	5.15213	5.13441	4.79431	5.41415	4.61484	4.75047	5.01502	5.05739	4.46034	5.70474	5.25448	4.45426	5.52125	4.48013	4.72637	4.95165	4.95285	4.83	4.96054	5.333	5.30709	5.37979	5.2979	4.92215	4.73783	5.07683	5.50677
ENSG00000015133	CCDC88C	protein_coding	5.00922	4.49023	4.10361	4.77308	4.83805	4.49007	3.23716	4.9665	4.53067	4.15983	4.21545	4.34265	3.53663	3.40068	3.86102	4.27288	4.75786	3.8485	4.63579	4.82926	3.75269	5.02996	4.9004	3.34497	3.72131	4.41156	3.92428	4.22173	4.09214	2.95224	3.94284	5.03131	4.84966	4.86333	3.55975
ENSG00000015153	YAF2	protein_coding	4.27349	2.86735	4.22733	3.67133	4.36061	3.67944	3.84846	3.66209	3.17995	3.93156	3.17444	3.69155	4.81861	4.11289	3.75793	4.02637	3.93963	4.86072	4.00451	4.17226	4.12163	3.76741	3.54127	4.56755	4.06475	3.86906	3.03231	4.19614	4.02913	3.77391	3.59318	2.63942	2.32339	3.13156	3.61208
ENSG00000015171	ZMYND11	protein_coding	7.19171	6.45128	6.91425	6.43857	6.84466	6.68435	6.92999	6.46953	6.50623	7.09579	6.87951	7.02461	7.57648	6.95905	6.8835	7.11823	6.80617	7.5198	6.97508	6.71289	7.3112	6.53303	6.65064	7.20579	5.37182	7.06495	6.78416	7.19079	6.98728	6.9351	6.88071	6.48909	6.5865	5.53068	6.88851
ENSG00000015285	WAS	protein_coding	3.55826	4.08639	2.70704	3.0286	3.3166	4.56925	2.74034	3.92983	3.77091	3.66428	3.39779	4.01992	4.13079	4.64599	2.62397	3.19153	4.02695	3.88457	3.49821	3.73181	3.4733	4.49159	2.7492	4.49715	3.37204	4.2012	3.14699	3.90537	3.3634	4.06033	3.11126	2.9232	2.84341	4.20193	3.00145
ENSG00000015413	DPEP1	protein_coding	-0.550073	-1.59423	-0.87992	0.0954278	0.469436	-0.200695	-4.08843	0.865763	-3.10613	-1.70734	-1.11434	-1.18066	-3.11898	-2.94625	-1.37692	-1.40202	2.05083	-0.136328	0.317763	1.38568	-2.16845	-0.693294	-0.328127	-4.08843	1.30415	-0.468114	-2.22772	-2.66939	-2.5113	-2.35602	-4.08843	-0.0477481	-0.798574	3.78253	-3.53939
ENSG00000015475	BID	protein_coding	4.19372	4.19154	3.8648	3.77358	3.905	4.40457	3.50103	3.49881	4.16146	3.82044	3.96152	3.97916	5.09785	4.94415	3.17486	3.75302	3.80448	5.38405	3.94883	3.85515	4.0486	3.94471	3.40389	4.94022	5.08288	4.18296	3.67843	4.31027	3.75784	4.64655	3.34962	4.31185	4.19172	4.52041	4.54273
ENSG00000015479	MATR3	protein_coding	8.48061	7.60755	8.2791	8.21792	8.26535	8.06394	8.22754	8.06409	7.49572	8.37312	7.94436	8.29852	9.01159	8.46055	8.08681	8.16398	8.05359	9.05172	7.9703	8.26088	8.49153	8.21349	7.84241	8.64604	8.48023	8.16311	7.8986	8.2559	8.18203	8.2233	7.95718	7.7752	8.32714	7.31001	7.89889
ENSG00000015520	NPC1L1	protein_coding	-1.302	0.466697	-1.42524	-1.96703	-2.40535	-1.18737	-2.04739	-0.877286	0.337014	-1.8843	-0.829606	0.227889	-2.13449	-1.54529	0.235576	-1.99682	-2.19535	1.16812	-0.998021	-2.47064	-0.0604759	-1.45779	-2.45999	-1.13433	-3.11399	-2.10759	0.0366576	-1.79383	-0.0120354	0.326031	0.550706	-2.62904	-1.23658	-1.06518	-0.604494
ENSG00000015532	XYLT2	protein_coding	4.05914	5.24061	3.56115	4.08958	4.28567	4.19488	4.0075	4.18222	3.89289	3.97436	4.33913	3.79272	2.96922	3.30033	4.19239	4.01786	4.59406	3.35199	3.74996	4.47413	3.93355	4.0145	4.34506	2.91385	5.61995	4.11005	4.20556	4.0001	4.12385	3.51858	4.0282	5.17448	4.84966	4.93958	3.98875
ENSG00000015568	RGPD5	protein_coding	4.73267	1.6296	4.53644	2.96178	3.49684	3.75454	1.88402	3.75515	2.25142	5.42532	2.53686	3.17979	4.14923	4.31414	3.85406	4.4394	4.17447	3.55217	3.39593	5.13288	4.96141	4.46359	3.40389	5.20184	4.22867	4.306	2.55577	3.72028	3.44676	3.14828	2.02566	3.60441	2.22727	3.51192	3.4015
ENSG00000015676	NUDCD3	protein_coding	6.28118	6.63761	6.06101	6.12046	5.90075	6.10477	6.29187	5.95209	6.80226	6.21099	6.34675	6.61287	6.31237	6.07545	6.30826	6.39652	6.19502	6.81012	6.35811	5.78703	6.67795	5.86577	5.68601	6.12951	5.75184	6.13094	6.52744	6.37706	6.48853	6.51586	6.33659	6.22844	6.10549	6.59377	6.8255
ENSG00000016082	ISL1	protein_coding	1.27314	2.06486	1.22609	1.02058	1.24635	2.49488	4.55086	2.69464	0.964467	0.811894	2.53058	2.90642	0.552684	2.34965	5.49374	1.5056	3.09545	3.05764	3.76176	1.95978	2.97707	1.01263	1.31816	1.51937	0.184551	1.61437	4.00469	1.01932	3.54372	2.91354	3.99678	-0.528797	-0.226866	1.27045	2.84079
ENSG00000016391	CHDH	protein_coding	1.31396	2.28819	1.55481	2.94342	1.8352	1.88147	2.53533	1.72451	1.00626	1.5984	2.02318	1.02866	0.376123	1.68551	2.27385	1.3515	1.65727	1.60286	0.148351	1.60343	0.615208	1.60176	3.12764	0.894899	2.66782	0.817549	2.05612	0.190658	2.18536	1.251	1.39861	1.62116	0.995871	3.34343	2.15995
ENSG00000016402	IL20RA	protein_coding	1.60458	0.975034	2.60933	2.78235	3.12786	3.37194	2.02052	2.49979	0.269978	1.30012	1.71534	-0.546934	0.376123	1.55223	1.93886	1.02885	3.489	2.40235	0.75557	2.83049	2.05326	2.82891	3.83278	1.00869	2.21819	1.96316	1.86255	2.21761	2.07988	1.70824	2.22864	2.57447	1.74379	4.72947	2.14227
ENSG00000016864	GLT8D1	protein_coding	5.14549	5.83666	4.68453	4.73223	5.27577	5.60327	5.14337	5.39143	5.31687	5.06755	5.48721	4.71334	4.72954	4.67032	5.27501	5.2344	5.88262	4.35642	4.81633	5.13663	4.82853	5.06437	5.47806	4.28089	4.63984	5.70936	5.14768	5.21564	5.09581	4.93758	5.0398	5.36297	4.89937	6.15017	5.33934
ENSG00000017260	ATP2C1	protein_coding	7.09987	6.56119	6.68565	6.90338	7.01091	6.28726	7.01178	6.45825	6.57554	7.04379	6.7266	6.9004	7.16895	6.97704	6.89485	6.80637	6.049	7.44678	6.7833	6.36138	6.94554	6.55934	6.39644	7.06392	6.56653	6.77624	6.46027	7.05111	6.93082	6.95905	6.60449	7.0889	6.93068	5.91063	6.61725
ENSG00000017373	SRCIN1	protein_coding	0.424239	1.16228	1.7262	-0.418378	2.09427	0.0671067	0.871149	0.71668	0.735168	-0.0854383	0.426239	1.14661	0.312117	-0.314958	1.97352	-1.07618	-1.99855	2.82992	0.469355	0.543492	1.64502	-0.423459	1.81819	-0.283157	2.8491	-0.0250539	1.25064	-0.186295	0.944559	1.70824	1.3825	2.34056	0.995871	0.124975	2.7677
ENSG00000017427	IGF1	protein_coding	8.02508	8.04413	7.50702	6.10558	8.36472	7.72099	7.8335	8.07943	6.27043	7.0054	6.1052	7.74177	8.58136	7.24206	8.66481	7.34645	7.78005	9.77043	7.74496	8.52229	7.66682	8.26415	6.58305	8.4506	6.51467	9.15429	7.03239	9.17889	8.51153	8.05537	7.99329	6.35077	5.4322	6.35213	6.74284
ENSG00000017483	SLC38A5	protein_coding	2.94259	3.5716	3.65555	1.59154	2.52403	2.46206	2.47325	2.35595	2.26869	1.92817	2.1838	0.75918	2.67056	2.38927	2.45644	1.3515	3.44317	2.22613	1.07216	2.1983	0.576147	1.83566	2.01536	2.21314	3.48232	2.71908	2.06947	1.45871	2.10942	1.95682	1.11624	3.78032	1.60789	3.79263	1.73362
ENSG00000017621	MAGIX	protein_coding	0.424239	1.05827	2.82781	0.664932	0.101137	0.292895	0.636369	1.03726	1.54908	0.782548	0.905212	-0.342351	-0.55997	0.298237	0.422777	0.155115	0.272133	0.127236	0.380324	-0.235551	0.316567	-0.238901	0.309457	0.00706981	2.68064	-0.0250539	0.239333	0.190658	0.423883	0.364792	0.714183	-0.268315	0.899369	1.97368	0.232599
ENSG00000017797	RALBP1	protein_coding	6.55514	6.52507	6.44867	6.59448	6.42802	6.36786	6.53634	6.20793	6.64993	6.67847	6.59592	6.49049	6.42729	6.41598	6.35049	6.58651	6.02869	6.61367	6.59911	6.09106	6.76084	6.05042	6.55804	6.38267	7.49619	6.29802	6.40406	6.71644	6.47866	6.19403	6.42186	6.64155	6.86725	5.98227	6.63632
ENSG00000018189	RUFY3	protein_coding	4.89784	4.85279	4.63738	3.70168	4.50799	5.13439	4.6259	4.7818	4.52709	4.96188	5.02169	4.91795	5.731	4.46778	4.86619	4.73783	4.59597	5.71646	4.87046	4.43816	4.86747	4.63733	4.60332	6.08934	3.42252	4.97612	4.75168	4.912	4.63454	5.08125	4.98348	4.16239	3.42298	3.99871	4.60216
ENSG00000018236	CNTN1	protein_coding	5.30965	3.14631	4.91056	3.40907	7.09726	5.76335	4.78929	6.01503	3.27704	4.06246	5.28391	3.71083	5.56242	3.6656	4.62183	3.4241	6.01879	2.68743	3.78217	5.62848	3.82111	5.39694	5.56006	4.34079	0.694731	5.43675	4.34389	5.00925	3.76714	4.59246	3.90667	5.19623	3.16383	5.64012	3.5796
ENSG00000018280	SLC11A1	protein_coding	3.27787	4.33197	3.72251	1.71571	4.1035	3.76265	2.82356	0.0426408	3.67052	4.64063	3.35224	3.71083	5.90516	5.63712	1.91231	3.87432	3.16896	5.61811	3.44066	4.17712	3.82943	4.22931	2.67892	6.93707	3.67081	4.85468	3.5245	5.15583	3.75161	4.92629	2.9235	3.44775	2.25354	3.08846	4.66698
ENSG00000018408	WWTR1	protein_coding	7.82075	6.85932	7.73724	6.55422	7.72049	6.98244	6.88002	6.72196	6.50623	7.22207	6.75615	7.19549	8.73819	8.01044	6.92283	7.33164	7.03789	8.12108	6.7775	7.55694	7.38757	6.8581	6.81532	7.82388	6.23236	7.84035	6.55352	7.38308	6.96758	7.2277	6.8348	5.65718	5.96752	5.71287	6.84545
ENSG00000018510	AGPS	protein_coding	5.72257	5.73807	5.75243	5.81571	5.33736	6.54948	6.11638	5.75521	5.63754	6.0001	5.4536	6.12563	6.24326	6.20322	6.11225	5.97634	5.75118	6.25798	5.95631	5.79337	6.18765	5.94475	5.38518	5.76594	5.30405	6.70576	5.46124	6.1312	6.16485	5.68752	6.09029	5.30909	6.14417	4.58965	5.37385
ENSG00000018610	CXorf56	protein_coding	4.25789	4.19461	4.32084	4.24567	4.23279	4.1482	4.20904	4.16382	4.78291	4.413	4.19377	4.46578	4.70171	4.43739	4.31738	4.62276	4.24658	4.97389	4.48024	4.14772	4.76699	3.85372	4.29533	4.43744	4.90039	4.27621	4.15164	4.41381	4.32401	4.4465	4.29898	4.25209	3.8526	4.41533	4.5461
ENSG00000018625	ATP1A2	protein_coding	7.32966	6.48049	5.86467	4.5682	4.58814	4.54595	4.8501	5.36036	6.77834	7.05342	6.68516	6.67259	7.12014	3.74792	6.05424	7.87989	3.77788	6.15344	7.95512	5.66698	8.48413	4.48996	3.33524	7.22652	-1.13345	6.04838	6.92422	7.87002	5.20589	7.39913	5.6872	1.13872	0.932259	2.02029	8.05856
ENSG00000018699	TTC27	protein_coding	4.36617	3.62263	4.35742	4.31156	4.13799	3.9013	4.27193	3.77683	4.32313	4.29326	4.38335	3.94375	5.02735	4.04629	4.05351	4.04884	3.71616	4.98501	4.06766	3.77089	4.20721	4.02806	4.26613	4.57864	4.55535	4.51902	4.2236	4.10007	4.35517	4.36759	4.05387	4.23774	4.64416	4.12137	4.44153
ENSG00000018869	ZNF582	protein_coding	1.09724	1.05827	1.22609	0.642349	1.68	1.74626	1.44057	1.60838	2.64446	1.07656	1.62395	1.65648	1.68382	0.981656	1.61589	1.40472	1.68617	1.88991	1.31571	1.57426	1.54742	1.48861	2.48974	1.63729	0.254815	1.2789	1.76741	1.04248	1.64149	1.58232	1.34971	0.997197	1.49134	0.563039	1.83618
ENSG00000019102	VSIG2	protein_coding	3.16527	1.03106	-1.54015	2.54124	-1.77228	-2.64203	2.58021	0.00639031	2.90964	2.34434	2.49878	0.18442	0.496198	2.47463	1.68025	-0.982096	-1.53121	0.481449	-0.416469	1.46727	-0.123385	0.87932	-2.11445	0.211029	-3.52046	-0.41161	2.46268	0.455129	1.87727	1.18755	1.7141	0.664163	-2.11511	5.59368	2.05044
ENSG00000019144	PHLDB1	protein_coding	7.89871	8.45935	7.03143	5.99685	7.67552	6.86088	6.31141	6.67727	8.50097	7.18225	7.48478	8.30488	8.73952	6.77079	7.79279	8.36435	7.57006	7.82413	8.36352	7.64352	8.62849	6.29952	6.8369	8.12656	6.71879	7.70296	7.47555	8.08605	7.29722	8.4134	7.91683	7.15599	5.79888	7.96572	7.91346
ENSG00000019169	MARCO	protein_coding	3.83909	7.35664	3.42992	2.61847	2.34368	4.67613	7.15862	2.12187	4.10007	8.42047	6.82638	4.53447	5.67166	5.47279	4.85345	6.72763	3.05725	6.09691	4.37855	3.66421	5.07784	2.66498	1.1202	4.2989	1.73126	5.26321	5.82535	5.72978	6.74961	4.22212	5.24651	1.93109	1.2518	1.50156	6.40006
ENSG00000019186	CYP24A1	protein_coding	-4.08843	-3.35549	-0.806154	-4.08843	-1.53643	-4.08843	-4.08843	-0.18993	-4.08843	-2.94919	-4.08843	-3.4182	-4.08843	-2.31684	-3.24616	-4.08843	-4.08843	-3.06403	-4.08843	-2.24593	-3.32625	1.63759	-1.49859	-4.08843	0.254815	-3.51195	-4.08843	-4.08843	-3.50738	-4.08843	-3.50511	0.812371	-4.08843	-0.799279	-4.08843
ENSG00000019485	PRDM11	protein_coding	3.19835	3.05469	2.85648	2.42035	3.20309	2.16043	2.10483	2.24365	3.37599	3.40017	3.70144	2.57726	3.40474	2.97535	2.56837	2.5069	3.17407	3.20757	2.71132	2.77389	2.91581	2.54434	1.96172	3.42093	2.53294	2.85196	3.07928	2.82347	2.99793	3.35974	2.36614	2.82887	2.53088	2.73729	3.60564
ENSG00000019505	SYT13	protein_coding	-4.08843	-3.35549	0.676398	3.76577	3.12356	-3.57109	-4.08843	-1.66948	-2.52712	-3.40916	-3.1953	-2.10416	-3.11898	-3.40714	-4.08843	-1.52934	-0.394348	-2.05199	-0.0853001	-1.88028	-2.16845	1.35151	3.61262	-3.48513	6.04058	-1.93838	-3.67811	-3.44871	-3.50738	-3.42786	-3.50511	4.74347	2.61938	2.33803	-2.83182
ENSG00000019549	SNAI2	protein_coding	5.51833	6.37418	4.64233	3.45515	5.42027	6.0774	6.00216	5.62454	4.75866	5.51393	6.00631	3.94049	6.89697	6.2321	5.9274	4.18435	6.81151	4.59283	5.7415	5.63202	3.3969	5.27901	4.36242	5.96656	3.73981	6.15453	5.50919	6.03561	5.73192	5.71778	6.13427	3.80177	3.94009	3.95139	4.5744
ENSG00000019582	CD74	protein_coding	10.5334	10.7832	9.94418	10.1262	10.1188	11.4944	9.63221	10.4217	11.9057	10.667	10.2161	11.2211	9.84285	11.2374	8.86036	9.1965	10.4239	10.2248	9.72399	10.4281	9.1357	11.4883	9.77682	9.82384	11.0207	10.8058	9.92553	9.38369	10.1686	10.7367	9.43291	10.2402	10.385	12.4773	9.75738
ENSG00000019991	HGF	protein_coding	4.66328	4.68177	4.73482	3.62024	3.93718	5.02406	5.06002	4.59303	4.08552	4.6948	4.63521	4.57711	4.56422	5.86674	5.15936	4.96593	3.96344	4.10445	4.55503	4.60247	4.13848	3.77815	3.1478	4.94737	1.16511	4.98799	4.03394	4.42487	4.65305	4.3289	4.42039	1.93109	1.81606	2.77175	3.63755
ENSG00000019995	ZRANB1	protein_coding	6.49595	5.39935	5.70984	5.68578	5.99667	5.506	5.59533	5.51672	5.7632	5.93407	6.00235	5.88465	6.47466	5.78462	5.69211	5.88644	5.73657	6.70308	5.61469	5.90813	6.09829	5.66558	5.78842	6.47763	4.86853	5.79888	5.75837	6.14732	5.57666	6.08581	5.63373	5.56822	4.6651	4.83101	6.18371
ENSG00000020129	NCDN	protein_coding	3.94358	5.32286	4.57663	5.19576	3.84624	4.20285	4.08219	4.03254	4.51989	4.18808	4.58611	4.06256	5.52938	4.55529	4.25536	4.09813	4.38962	4.93428	4.14402	4.26645	3.87842	4.1612	5.87258	4.62399	4.57093	4.4387	4.42535	3.92419	4.56339	4.73797	3.68803	4.00183	5.22633	5.20972	4.31109
ENSG00000020181	GPR124	protein_coding	7.83856	8.33342	7.1148	5.27405	7.24846	7.33713	6.60127	7.47528	7.71279	7.49058	7.70353	7.79015	8.22786	6.96028	7.3974	7.64784	7.73495	6.82024	7.07184	7.4631	7.37802	6.76297	6.84309	7.24056	5.46555	7.87501	7.99022	8.02177	7.10194	7.01685	7.32002	5.23681	5.93898	6.34185	6.9242
ENSG00000020256	ZFP64	protein_coding	2.91632	4.00481	2.98671	3.41241	3.21121	3.50032	3.34943	3.48241	3.105	2.9635	3.59717	2.85882	1.63233	2.23472	3.43322	3.34463	3.43468	1.76646	3.22323	2.65356	2.98455	2.77094	4.30793	1.91925	4.91809	3.04096	3.19652	3.15633	3.32194	2.64884	3.34131	4.06674	4.22694	4.04453	3.21107
ENSG00000020426	MNAT1	protein_coding	4.09471	3.40669	3.46387	3.76837	3.81992	2.90452	3.65228	2.79368	4.19347	4.00009	3.90683	3.93722	3.97933	3.77434	3.49714	4.07369	3.24376	4.86374	3.54675	3.12007	4.43986	3.17612	3.60971	3.9228	3.58817	3.66087	4.15164	3.84407	3.76404	4.30418	3.4651	3.68354	3.73868	3.99871	4.39001
ENSG00000020577	SAMD4A	protein_coding	5.9427	5.30877	6.30367	4.93977	6.90317	5.48165	4.65766	4.66747	5.61408	5.11099	5.57218	5.39878	8.37364	6.01421	5.07908	5.91881	5.38429	7.36721	6.42595	6.99428	5.7056	5.02884	4.37444	8.55743	2.68701	5.77474	5.009	5.35629	5.14775	7.35499	5.04109	4.43015	3.66722	3.45367	5.70123
ENSG00000020633	RUNX3	protein_coding	6.19503	4.26053	4.05495	3.32294	5.40176	4.98647	2.86041	5.22297	4.54492	4.69283	3.93086	4.44059	4.52945	4.59183	2.83657	3.2215	5.4479	4.52589	4.04128	5.9008	3.43014	6.14213	3.62992	4.5261	5.09849	4.77172	2.75903	3.91481	3.39173	4.61273	3.36611	3.49239	3.78893	3.7274	2.36446
ENSG00000020922	MRE11A	protein_coding	4.06811	3.47897	3.95507	4.64546	3.91746	3.47093	3.93737	3.65918	2.79511	3.87011	3.56988	3.99811	3.91075	4.083	3.9529	3.79681	3.25345	3.87265	3.96423	3.73181	3.79583	3.5745	3.92909	3.87558	4.35999	3.72528	3.47015	4.21665	3.79467	3.34042	3.88681	3.94515	3.73868	3.32498	3.40522
ENSG00000021300	PLEKHB1	protein_coding	2.39519	3.13996	3.50791	5.5724	5.17036	1.28813	2.75346	2.46014	3.28555	2.31389	2.61607	1.25564	1.24364	2.79535	1.59378	1.33332	2.22833	0.958469	1.49604	3.46807	1.30618	2.2055	3.45655	1.24995	6.56393	1.39433	2.94443	0.87196	2.10942	2.3536	1.2287	3.6246	4.9444	6.74929	1.69775
ENSG00000021355	SERPINB1	protein_coding	6.11933	5.69429	6.72195	5.55965	6.13757	6.10848	6.15025	5.42272	6.97925	6.4391	5.94273	7.18415	7.19636	7.16996	5.29741	6.42685	5.93322	8.05336	5.97226	6.3773	7.13385	6.30184	4.4942	7.57091	5.36787	6.22806	5.76865	6.33253	6.03809	7.37382	5.65737	6.01364	6.31756	6.06311	6.64459
ENSG00000021574	SPAST	protein_coding	4.85699	4.38667	4.77593	4.87102	5.70759	4.97139	4.72247	4.92704	3.50548	4.91024	4.03209	4.64483	4.65732	4.55093	4.65156	4.78542	4.59024	4.45568	4.41636	4.60066	4.41794	4.7764	5.1295	4.45561	5.09131	4.98141	3.74237	4.86243	4.5968	3.58984	4.55412	4.92459	3.95417	3.5835	3.69933
ENSG00000021645	NRXN3	protein_coding	0.813934	0.149945	1.95557	0.252784	1.74857	-0.0416401	0.211152	0.242873	0.401073	0.487517	1.44861	0.500235	1.37475	0.928859	0.496122	0.195942	0.726265	1.16812	0.77898	1.16869	-0.406665	0.172767	1.92482	0.487153	1.25357	0.501728	1.23886	0.148584	0.359776	0.544365	-0.507975	1.44158	0.208601	0.396351	0.933562
ENSG00000021762	OSBPL5	protein_coding	4.41857	5.58508	5.21181	3.78651	4.72489	4.63991	4.28555	4.23408	5.0384	4.44379	5.10854	4.5959	5.14684	4.72554	4.63947	4.62463	4.99577	4.55229	4.78343	4.43004	4.57726	3.93515	4.23444	4.59331	3.87422	4.62243	4.93158	4.71706	4.50161	5.05926	4.47081	4.27527	3.38487	4.38671	5.55435
ENSG00000021776	AQR	protein_coding	5.34823	4.9595	5.01218	5.04574	5.06451	5.12604	5.23625	5.04342	4.96612	5.46858	5.33163	5.4931	6.1763	5.64737	5.14992	5.08346	4.56518	6.08015	5.27931	5.17234	5.34946	4.97501	4.93212	5.86898	5.44221	5.41445	5.45298	5.38375	5.531	5.64682	5.31605	4.59786	4.90559	4.57802	5.51967
ENSG00000021826	CPS1	protein_coding	2.8828	3.13996	2.08721	1.36203	2.04059	1.96816	3.21836	2.92085	2.59053	2.58432	2.23102	3.09429	3.1631	1.86486	2.3615	3.29381	2.22833	3.51429	2.86142	2.27281	3.83358	1.70668	1.60147	2.95418	-0.381229	2.71274	2.92986	2.83678	3.34282	2.81201	3.50287	2.79006	0.336963	1.62733	2.76192
ENSG00000022267	FHL1	protein_coding	9.18467	9.60109	9.48463	6.8597	8.74567	7.6834	8.02605	7.75796	11.0379	9.83409	9.27912	10.375	10.3421	8.32634	9.03958	10.7732	7.41711	10.3876	10.8534	9.22057	11.204	7.14257	5.96465	11.2284	6.34083	9.78844	9.82736	10.5963	9.44181	10.7283	9.94656	4.54798	5.0171	6.38923	9.91349
ENSG00000022277	RTFDC1	protein_coding	6.18406	6.3218	6.04677	5.96763	6.06884	6.13943	6.08364	5.8484	6.68654	6.31777	6.14169	6.37136	6.58879	6.24228	5.94551	6.30559	6.25834	6.7944	6.23179	6.02591	6.64352	6.00771	6.24	6.55084	6.59347	6.1136	6.12666	6.34015	6.21779	6.49144	5.98814	6.13651	6.32416	6.61385	6.52003
ENSG00000022556	NLRP2	protein_coding	0.566159	-1.98071	4.5523	-0.15841	-0.496798	2.13567	1.17405	2.08758	0.735168	-4.08843	-0.209191	-0.546934	-0.239089	2.29854	0.757079	-0.276035	2.46352	0.279504	1.36295	1.5141	-0.258083	-0.114493	0.791688	-0.646859	-0.381229	-2.10759	0.374601	-0.241174	-1.29115	-0.49945	0.714183	-0.425528	0.125718	4.19433	-1.59501
ENSG00000022567	SLC45A4	protein_coding	2.81333	3.78621	4.15299	4.47383	3.76856	4.00062	3.94311	3.50532	3.4153	3.73109	3.81167	3.68767	3.85569	4.40876	3.39857	3.38932	3.30094	4.06831	3.22749	3.56392	3.77872	3.85118	3.80004	3.78904	5.62244	3.90009	3.28219	3.53673	3.61411	3.90133	3.68146	5.68485	4.01876	4.23195	4.63572
ENSG00000022840	RNF10	protein_coding	7.00101	7.46039	6.70707	7.11474	6.65301	6.66645	6.99703	6.5881	7.56813	6.94501	7.07388	7.14288	7.56366	7.22437	6.79696	6.89078	6.63005	7.77893	7.07539	6.70071	7.21753	6.42527	6.552	7.74992	6.05172	6.74862	7.13004	7.09746	7.00572	7.62224	6.73875	6.77446	7.36563	7.14826	7.5717
ENSG00000022976	ZNF839	protein_coding	2.99374	3.42771	2.58897	2.9799	2.26784	2.9191	2.9429	2.96402	3.35188	2.5758	3.37344	3.06463	2.45038	2.44674	2.89197	3.32175	2.94813	3.0889	2.81121	2.1983	3.61974	2.93829	3.0948	2.48889	1.9588	2.7627	3.20864	2.94521	3.11906	3.14828	3.07661	3.18491	3.77086	3.23892	3.72331
ENSG00000023041	ZDHHC6	protein_coding	4.79166	4.53693	4.30428	5.26669	4.74181	4.94788	4.48356	4.56993	5.31479	4.75648	4.74094	4.6021	5.07151	4.87257	4.62592	4.78207	4.70413	5.46967	4.58522	4.51116	4.74073	4.70924	4.91694	4.99786	5.52629	4.8256	4.56862	4.60095	4.63115	5.27049	4.51584	5.26667	4.26939	4.85049	5.00332
ENSG00000023171	GRAMD1B	protein_coding	2.95555	3.42249	1.11655	3.70713	2.06768	3.35417	2.13522	2.228	0.337014	2.81922	1.71534	1.55773	2.59188	2.8173	1.62682	0.612597	2.56815	4.21719	0.911984	2.83049	0.408382	3.58065	2.50232	1.82297	3.22226	2.3781	1.60264	1.96227	1.25765	2.29459	1.6881	2.38385	2.50379	3.33423	1.40328
ENSG00000023191	RNH1	protein_coding	7.20771	8.02615	6.51942	6.44999	6.47347	7.25617	7.05877	6.48031	7.72301	7.42444	7.20728	7.26202	7.42633	7.11931	7.00417	7.24066	6.60142	7.53217	7.01506	6.59985	7.4023	6.45486	6.06927	7.52742	6.21319	7.09969	7.29936	6.9333	7.29936	7.42429	7.01714	6.18253	6.33496	7.15186	7.29614
ENSG00000023228	NDUFS1	protein_coding	6.8118	6.57833	6.54122	6.73984	6.26056	6.24592	6.95363	6.19943	6.48976	6.54229	6.01533	7.43891	7.31999	6.67335	6.97052	6.65537	5.89273	8.18395	6.79841	6.6799	7.19273	6.11274	6.39601	7.2031	6.40934	6.80074	6.88108	7.17286	7.21326	7.10785	7.49162	6.01288	7.04411	5.61377	7.47787
ENSG00000023287	RB1CC1	protein_coding	6.4904	5.84938	6.55047	6.06953	6.42889	5.98686	6.51338	6.03203	5.01556	6.55591	6.09619	6.5776	6.71868	6.49245	6.3681	6.54514	5.73138	7.12359	6.28539	6.11531	6.76139	6.03371	5.51189	7.06095	5.91533	6.38633	6.05796	6.85493	6.45488	5.67022	6.40849	5.89438	5.86798	4.42619	6.29243
ENSG00000023318	ERP44	protein_coding	6.27085	5.93904	5.9423	5.49337	5.79664	6.02388	6.11511	5.65633	6.53507	6.23691	6.03542	6.0804	6.44419	6.6653	5.7871	5.89886	5.64478	6.55612	5.89469	6.00557	6.28018	5.93639	5.62261	6.06455	5.57602	6.19205	5.77222	6.08036	6.31714	6.43961	5.68966	5.74558	6.04475	6.06519	6.09686
ENSG00000023330	ALAS1	protein_coding	4.90119	5.3534	4.63573	5.03169	4.46788	5.43675	4.39425	4.42641	5.31271	4.56939	4.71072	5.83719	5.78946	5.48427	4.84295	5.8397	4.05491	6.25224	5.12344	4.56774	6.37711	3.71528	4.96203	5.9517	5.01111	4.93041	4.91132	5.33886	4.82018	6.05058	4.73003	5.08038	4.67606	4.76069	5.36053
ENSG00000023445	BIRC3	protein_coding	7.35004	3.96582	5.37926	4.8939	6.38873	5.2398	6.27775	6.71707	6.54041	5.85257	5.99439	6.9004	6.63613	8.29832	5.31018	5.44382	5.45736	6.92788	4.80212	6.56922	6.60947	7.20086	4.64362	7.77888	5.07562	6.63711	5.91547	5.6234	7.9021	6.20676	5.36404	4.43245	5.3077	4.69217	3.89945
ENSG00000023516	AKAP11	protein_coding	6.60584	5.97251	6.35028	5.60561	6.25419	6.37581	6.71672	6.62106	5.38379	6.63705	6.2012	7.19138	6.59385	6.54821	6.7842	6.68076	6.08063	6.58106	6.66066	6.27054	6.63405	6.24249	5.37068	6.51662	5.09011	6.81153	6.2999	7.02191	6.7878	5.60595	7.00699	5.59201	4.81701	4.5485	5.87859
ENSG00000023572	GLRX2	protein_coding	2.05338	2.02403	1.86814	2.16709	2.01297	2.11893	1.74643	1.59624	3.00548	1.9808	1.62395	2.53463	3.14484	2.65612	2.19527	2.17038	1.78299	3.51429	2.27407	2.27281	2.96955	1.86618	1.71389	2.98787	2.04063	2.19007	1.80782	1.91285	2.36755	2.75479	2.09654	1.66861	2.0736	1.74302	2.4816
ENSG00000023608	SNAPC1	protein_coding	4.21543	2.82043	3.49703	3.22376	4.09694	2.95728	2.74034	3.0287	3.35996	3.57296	3.4285	3.92406	4.83579	5.04837	3.05457	3.84253	3.09006	4.45168	2.93621	3.79005	3.81273	2.99463	2.90889	4.19935	2.92109	3.56205	3.59777	3.87988	3.52558	4.07209	3.34547	3.01173	3.13587	3.4193	3.23212
ENSG00000023697	DERA	protein_coding	4.45096	4.52478	4.58008	4.8807	4.39666	4.82551	4.7845	4.08779	4.74947	5.01331	4.55553	4.82193	4.61815	4.95409	4.23765	4.46677	4.40273	4.9053	4.20146	4.3441	4.4262	4.68091	4.14501	4.22077	4.66102	4.77172	4.37515	4.6583	4.59158	4.73797	4.47462	4.30811	4.98121	4.18924	4.77851
ENSG00000023734	STRAP	protein_coding	6.91615	6.50851	7.00542	6.84617	6.81599	6.09142	6.38859	5.9061	6.93936	6.72934	6.03098	6.80988	8.02788	7.37628	6.34595	6.71056	6.08471	8.22761	6.70411	7.038	7.3304	6.38587	7.03089	7.85255	6.6826	6.60194	6.25713	6.67211	6.72159	7.45465	6.40151	6.70195	7.0956	6.18383	6.88154
ENSG00000023839	ABCC2	protein_coding	0.496943	1.08498	0.0793172	-0.925093	0.202394	-0.477937	-1.04066	-0.148471	-0.214763	0.55849	0.284219	0.873081	0.312117	0.212482	1.48988	2.24036	0.382198	0.542936	2.24914	0.450249	0.494702	0.172767	-1.22541	0.422917	-1.67105	1.0765	0.308552	1.42386	0.454899	-0.49945	0.579271	-0.986953	-0.798574	-1.5189	0.95398
ENSG00000023892	DEF6	protein_coding	3.43877	3.3081	2.54736	2.9799	3.10625	4.18285	2.70701	4.0235	3.54855	2.7752	2.7732	2.95896	2.24289	3.77434	2.02399	2.0419	4.38522	2.81753	2.604	3.575	2.543	4.23712	3.10308	3.13547	4.08899	3.60376	2.52217	2.74799	2.46217	3.32084	2.55056	2.87005	3.74795	4.84241	2.18608
ENSG00000023902	PLEKHO1	protein_coding	5.16654	5.97697	5.07697	4.3608	4.89083	5.86601	4.61337	5.3782	5.29174	4.93045	4.60267	5.76894	5.50274	5.56109	4.42616	5.07391	5.69807	5.47164	4.23146	5.55293	5.3538	5.37853	5.88043	4.95591	5.28948	5.18063	4.39385	4.29347	4.49789	5.32433	4.42827	5.1779	4.78811	6.38812	5.01065
ENSG00000023909	GCLM	protein_coding	5.46949	4.06643	4.92281	4.29174	5.37309	4.02329	4.63125	4.01668	4.35986	4.87765	3.83224	5.53264	8.23002	5.52709	4.34742	5.73451	4.02129	8.82007	6.22168	5.70616	6.66462	4.05481	3.43374	8.42968	4.7243	4.65586	4.43441	5.78318	4.90265	6.63561	4.55592	3.69313	3.04857	2.86408	4.50691
ENSG00000024048	UBR2	protein_coding	5.58759	5.39268	5.32078	4.98085	5.76182	5.74846	5.68879	5.70591	5.30645	5.59635	5.63423	5.89058	5.67166	5.17845	5.7956	5.68786	5.13722	6.16571	5.81554	5.60163	5.97326	5.47905	5.54418	5.84773	4.42809	5.72834	5.81844	6.09704	5.88281	5.40791	6.00994	5.40502	5.47399	4.91358	6.1043
ENSG00000024422	EHD2	protein_coding	8.14021	9.25633	7.35856	5.90676	7.103	7.03471	7.56826	7.44513	9.74419	7.80639	8.47466	8.58453	8.55114	7.95046	7.82102	8.32836	7.33195	8.45655	8.64945	7.24013	8.70064	6.21113	5.89481	8.33441	5.81643	8.15144	8.35674	8.30056	8.31753	8.9686	7.93387	5.70632	5.40976	7.04602	8.43889
ENSG00000024526	DEPDC1	protein_coding	-0.62525	2.05137	1.8905	4.76395	0.169425	-0.287321	-0.453458	1.20659	-0.950129	-1.40767	-2.43629	-1.18066	-0.973262	1.70134	0.496122	-0.982096	0.484458	-0.875415	-0.710374	0.167385	-1.22758	0.71017	3.22192	-1.58439	5.1707	0.530854	-2.10262	-0.484298	-1.01134	-0.725071	-1.09273	3.4747	4.0264	-0.209556	-3.53939
ENSG00000024862	CCDC28A	protein_coding	3.76742	3.8184	3.46013	2.9295	3.22732	4.34102	4.04266	3.85281	4.51628	3.8132	3.82199	3.88386	2.37407	3.5348	3.73791	3.84253	3.77452	2.52931	3.41847	3.07913	3.75269	3.63779	3.91974	2.91385	2.89382	3.87191	3.88516	4.24687	3.67465	3.47052	3.78319	3.10954	3.58428	4.179	4.35589
ENSG00000025039	RRAGD	protein_coding	4.69066	4.37319	3.66531	5.71854	4.402	6.08227	4.6259	4.38818	5.21362	4.83897	3.71257	5.53372	4.48297	4.0617	4.47838	5.01238	4.49137	6.5383	5.18607	4.60967	6.09915	5.22214	4.26059	5.46668	3.55025	5.1481	4.67074	5.19124	5.3007	5.40209	5.70675	4.30935	3.24134	3.51192	5.23788
ENSG00000025156	HSF2	protein_coding	3.36785	3.27948	3.22966	2.7244	3.26682	3.38601	3.53562	3.59654	3.16158	3.41459	3.54207	3.40952	3.59831	3.09999	3.59777	3.52769	3.61458	3.72792	3.09852	3.04765	3.35136	3.08391	3.71072	3.62386	3.08435	3.07102	3.61381	3.70584	3.74535	3.50563	3.56131	3.82114	3.64259	3.48309	3.55642
ENSG00000025293	PHF20	protein_coding	6.31047	5.43353	6.15519	5.43051	6.51753	5.77542	5.46382	5.46591	4.62086	5.94653	5.59416	5.49644	6.95051	6.72604	5.55938	5.53216	5.71131	6.19952	5.75263	6.42862	5.56555	5.52281	5.59204	6.65893	5.83303	5.6796	5.64195	5.58053	5.46302	6.29658	5.47366	5.3375	5.63061	4.61265	5.68453
ENSG00000025423	HSD17B6	protein_coding	3.64879	4.97564	-0.271488	1.41628	1.21438	0.874684	6.23863	2.35595	4.04599	4.61381	3.98466	3.53596	2.11743	6.60611	4.65557	2.77959	1.48705	1.2807	1.03375	0.384561	2.56312	0.543916	2.05859	2.78562	1.25357	2.00528	4.32313	2.81677	5.20475	3.45264	4.23534	1.37639	-1.39075	3.62179	3.4382
ENSG00000025434	NR1H3	protein_coding	4.23946	5.79581	4.25344	4.35734	3.77131	6.40718	5.19597	4.56059	6.40149	4.71436	5.07873	5.21792	4.18093	4.76372	5.14612	5.24538	4.24658	5.46372	5.33664	4.30468	5.71687	4.36551	3.63278	4.3255	5.06221	4.61734	5.25386	4.8786	5.36028	5.7465	5.31074	3.44775	4.28698	4.92281	4.86461
ENSG00000025708	TYMP	protein_coding	5.91726	7.08243	5.87941	4.74421	5.42465	6.43957	5.15701	5.65486	6.23462	5.79862	4.88321	7.23131	6.68195	7.07937	4.56473	6.0125	6.43047	7.75477	5.68299	6.28186	6.51839	6.20119	5.94174	6.44616	7.40015	6.36222	4.74233	5.35166	6.86812	6.34767	5.3224	5.93011	6.45617	5.78803	5.36053
ENSG00000025770	NCAPH2	protein_coding	4.56314	5.30877	4.15299	4.27899	4.32737	4.19288	4.15568	4.20038	5.30645	4.23216	4.82798	4.65879	4.78953	4.37462	4.22512	4.53598	5.06204	5.24759	4.034	4.13779	5.01168	4.21949	3.70529	4.71733	6.17349	4.23256	4.66635	4.26668	4.32191	5.23038	4.31818	4.63417	5.69131	5.14677	5.10724
ENSG00000025772	TOMM34	protein_coding	3.86679	4.4977	4.57146	5.1283	4.50138	3.77339	3.58782	3.46582	4.78891	4.03161	4.10149	3.42361	5.65241	4.41836	3.22965	3.36267	4.2344	4.87872	3.39214	4.09222	3.93355	3.76201	5.84383	5.53094	5.74804	3.58653	3.94978	3.17741	3.71043	5.0827	3.15461	5.70158	5.50301	6.14558	4.25254
ENSG00000025796	SEC63	protein_coding	7.32935	6.77468	6.91901	6.24653	6.94639	6.85014	7.22723	6.74483	6.40637	7.27637	6.83245	7.1171	7.7012	7.42475	7.09181	7.20172	6.94454	7.79481	7.01506	6.94529	7.44086	6.55895	6.10373	7.44845	6.29987	7.13982	6.77934	7.3955	7.35334	6.97088	6.95854	6.03341	6.63132	5.95329	6.96218
ENSG00000025800	KPNA6	protein_coding	6.5631	6.65443	6.68525	6.81433	6.52528	6.1974	6.54155	6.18632	6.05339	6.69776	5.98753	6.83162	7.66842	6.84212	6.53365	6.54266	6.04691	7.71525	6.68603	6.62495	6.88789	6.1175	6.34891	7.41013	7.01136	6.47094	6.17727	6.75288	6.64926	6.63808	6.50191	5.70632	6.4135	5.50837	6.394
ENSG00000026025	VIM	protein_coding	11.6186	12.2815	11.0679	9.98039	11.4763	11.4683	11.29	11.0736	12.5552	11.6314	11.6445	11.7485	12.3015	11.4843	11.2492	12.0723	11.4905	12.2816	11.445	11.418	12.4595	11.0984	10.2306	12.1735	9.34602	11.5524	11.6233	11.8252	11.1808	12.3459	11.3415	9.41765	9.3077	11.0228	11.8201
ENSG00000026036	RTEL1-TNFRSF6B	protein_coding	2.93607	4.01873	3.17151	1.82	2.57527	2.1928	2.02052	2.28206	2.50567	3.03989	3.07873	2.36977	3.26804	3.00116	2.56269	2.03066	3.48489	3.971	2.5842	3.22232	3.34556	2.64165	4.16097	3.70713	0.792458	2.50828	3.19348	2.6905	2.68782	3.77751	3.31607	2.97445	2.76342	2.73729	3.48455
ENSG00000026103	FAS	protein_coding	6.29653	5.23018	4.51681	4.09166	4.83411	4.66175	5.58619	5.02316	5.8082	5.91645	5.04389	4.52579	5.19865	6.57691	5.10178	4.99803	4.91261	4.44364	4.16193	5.04658	4.74734	5.22312	4.34681	5.74721	3.70258	5.37384	4.54252	4.62224	5.13464	4.6347	4.52872	4.29808	4.3385	4.54452	4.1958
ENSG00000026297	RNASET2	protein_coding	5.91726	5.81588	5.96683	6.03852	5.22353	6.78331	5.28676	5.43726	5.69616	6.01516	5.50733	6.02295	5.70631	6.49359	4.70925	5.35985	6.31031	5.1298	5.22388	5.77106	5.47819	6.44351	5.93885	5.80348	6.40934	6.16385	5.16645	5.84047	5.43315	5.49238	5.05259	5.83278	6.46322	7.79946	4.80825
ENSG00000026508	CD44	protein_coding	7.82008	8.20498	7.55789	6.63042	7.30623	8.20944	7.46711	7.32264	7.39067	7.75207	7.1452	7.89752	9.95663	8.6158	7.27185	7.60774	7.60855	9.2717	7.09417	8.19505	7.36089	7.90474	6.42562	9.49461	6.56653	7.91733	7.27038	7.19079	7.15573	8.85322	7.1935	5.90101	5.7269	6.01213	6.93291
ENSG00000026559	KCNG1	protein_coding	0.347676	1.25928	1.19049	0.52381	3.04849	-2.24529	-1.23426	0.524996	0.125769	-0.524794	-0.766412	-1.29907	0.376123	-0.848113	-0.640739	-0.982096	-0.895787	-0.875415	-0.920557	0.686639	-1.71651	0.384371	3.67506	1.03041	2.2615	-0.71926	-0.561425	-1.49813	-1.39794	-1.45004	-0.700561	3.30739	2.67388	1.2896	-1.18471
ENSG00000026652	AGPAT4	protein_coding	4.05312	4.2924	3.54009	3.0286	3.87974	4.19887	3.26948	3.52147	4.07082	3.94817	4.28236	3.55742	5.00475	4.24023	3.5149	3.51564	4.08778	3.4754	3.1216	4.10247	3.28023	3.61999	4.47996	4.46362	2.51873	3.96821	3.52934	3.54891	2.93882	3.85783	3.33295	3.73646	3.28973	4.35297	3.39778
ENSG00000026751	SLAMF7	protein_coding	3.95331	3.05469	2.02794	4.62976	3.45299	5.79334	1.96521	5.55879	2.52016	2.05631	3.17846	3.7891	1.93821	3.19248	2.94096	1.48927	5.12012	3.97658	2.77674	4.2504	1.52708	4.3476	3.93838	1.91925	2.92648	4.58126	1.67433	1.50946	2.28365	2.60903	1.98354	2.14192	3.31489	3.86783	1.98249
ENSG00000026950	BTN3A1	protein_coding	6.22142	5.95632	5.11782	4.9223	5.73742	6.34959	5.81382	6.34034	6.20913	5.7311	5.95801	7.13897	5.53989	6.25641	5.5108	5.58307	6.02375	5.98644	5.36108	5.78624	5.53659	6.2536	5.58762	5.58239	5.68899	5.8525	5.30839	5.7737	6.10683	5.57425	5.78854	4.96791	6.08507	5.92754	4.98731
ENSG00000027001	MIPEP	protein_coding	3.59598	3.72808	3.5223	3.23134	3.25508	3.54174	3.89063	3.26183	3.61758	3.61102	3.70144	3.71466	3.48676	3.80396	3.6576	3.36267	3.42614	4.00417	3.23173	3.22701	4.03426	3.39077	4.05396	3.33191	4.52724	3.48972	3.67625	3.4089	4.06977	3.85783	3.68475	4.01566	4.5651	4.22201	4.28312
ENSG00000027075	PRKCH	protein_coding	6.56785	5.23466	6.22613	4.64262	5.55081	5.71681	5.09136	5.66725	6.38871	5.769	6.00348	5.93388	7.07806	6.38508	5.12219	5.87391	5.91197	6.34471	6.03559	6.1026	5.6643	6.3304	4.39651	6.13266	3.65465	5.64088	5.33352	5.82302	5.36947	6.29156	5.06905	3.26428	4.2153	4.16611	5.53754
ENSG00000027644	INSRR	protein_coding	-0.00710671	0.886697	-2.31246	-2.11307	-0.346178	-0.379483	-0.579395	-0.946659	-1.79493	-0.852918	0.159592	-0.475468	-0.55997	-0.674678	0.206734	-0.332977	0.346435	-2.05199	-2.56269	-0.0424754	0.113297	-1.56229	-2.45999	-0.230548	-0.812832	-0.941243	-1.51924	0.0605663	-0.639688	-0.897828	-1.28529	-0.0477481	-2.4126	0.360571	-1.18471
ENSG00000027697	IFNGR1	protein_coding	7.76916	6.6393	7.4496	5.68164	7.17717	7.41528	6.91948	6.4832	7.74824	7.48803	7.40617	7.10404	8.24644	7.93924	6.70682	7.0426	6.92004	9.0688	7.34441	7.212	7.67349	7.69653	5.86529	8.47766	5.7579	7.52509	7.06381	8.1281	7.4496	8.19501	7.20443	5.86667	6.07268	6.28631	7.60778
ENSG00000027847	B4GALT7	protein_coding	3.43877	4.51745	3.32303	3.49034	3.19901	3.72994	3.27404	3.60566	4.51989	3.38072	3.56682	3.66807	3.50834	3.41514	3.39857	3.60551	4.12255	4.35642	3.98703	3.26401	4.00514	3.45911	3.77951	3.39187	3.92897	3.65095	3.86615	3.53673	3.8217	3.92746	3.47653	4.40586	4.40151	5.19709	4.50345
ENSG00000027869	SH2D2A	protein_coding	1.99182	0.856007	1.78705	1.03798	1.38204	2.18477	0.285294	1.89282	2.21624	0.950288	1.08731	1.79299	2.29349	2.20172	-0.272617	-0.276035	2.45515	2.75394	0.77898	2.88495	1.1816	2.65918	0.812039	2.1351	1.76777	1.7319	0.215502	0.384381	1.22203	2.86705	0.0362167	1.60499	2.01339	2.09839	1.19605
ENSG00000028116	VRK2	protein_coding	4.13228	4.12873	4.05989	4.19614	3.86438	3.79726	4.19227	3.59349	3.59721	4.2723	4.03874	4.24024	4.48297	4.46778	3.64422	3.72191	3.66626	4.86374	3.72607	3.88515	4.0486	4.00539	3.34923	4.41284	4.11991	4.08081	3.74653	4.20899	4.38366	4.1407	3.80754	3.48578	3.98389	3.43229	3.94351
ENSG00000028137	TNFRSF1B	protein_coding	6.64336	6.55702	6.35883	5.13438	5.78104	6.98965	5.92599	6.05217	7.32149	7.02668	6.47282	7.4833	7.4955	7.77718	5.73124	6.22282	5.85981	7.23315	6.56753	6.49869	6.65411	6.54801	5.27588	7.47468	4.95549	6.82959	6.12546	6.70786	6.16015	7.54286	5.7893	4.99454	4.92717	5.72611	6.17721
ENSG00000028203	VEZT	protein_coding	5.73859	5.50327	5.26839	5.38872	5.76251	5.48083	5.7965	5.40019	5.35173	5.81774	5.60242	5.70019	5.83002	5.74604	5.48401	5.5131	5.38759	6.71482	5.40782	5.39405	6.0067	5.42625	5.69563	6.11878	4.90995	5.7463	5.41751	5.73512	5.60632	5.86447	5.46508	5.30283	5.2696	5.3256	5.84208
ENSG00000028277	POU2F2	protein_coding	4.03492	3.77804	2.64921	2.67519	3.0843	3.74092	3.20886	4.51777	2.3999	3.37581	1.9961	3.77451	2.78107	3.02651	2.6775	3.0428	4.33135	3.44351	3.79084	3.74822	2.94676	3.80728	2.31538	3.42504	3.24402	3.96288	1.64786	2.6905	3.34696	2.28452	3.07159	1.85792	2.17327	3.82253	1.57129
ENSG00000028310	BRD9	protein_coding	4.48487	5.14229	4.60395	4.6624	4.51785	4.60426	4.30573	4.28225	5.09275	4.59915	4.79431	4.57921	5.04714	4.42075	4.38653	4.65972	4.99143	5.37774	4.49798	4.551	4.87352	4.353	4.87644	5.13825	5.10326	4.431	4.55445	4.5892	4.31558	5.0914	4.52688	4.60905	5.05213	5.28561	5.41678
ENSG00000028528	SNX1	protein_coding	7.48518	7.22661	7.20787	6.7211	6.83221	7.38802	7.42161	7.03869	7.47587	7.74353	7.31643	7.80704	7.88773	7.37721	7.35285	7.66202	6.86778	8.11318	7.83776	7.10422	7.90192	6.99444	6.27799	7.99432	6.7246	7.54797	7.5058	7.90361	7.70978	7.54154	7.59228	5.60121	5.84765	6.58701	7.75158
ENSG00000028839	TBPL1	protein_coding	4.05613	3.28525	3.85914	3.51852	3.52643	3.57589	3.41282	3.47248	4.45724	3.83837	4.52428	3.76717	4.52593	3.76308	3.69702	3.95086	4.15909	4.14467	3.72305	3.48775	3.85821	3.47239	3.62129	4.52801	3.84035	3.56205	3.65647	3.96719	3.77022	3.93713	3.55773	3.85914	3.99949	3.82253	3.60887
ENSG00000029153	ARNTL2	protein_coding	3.71505	3.35275	3.88164	4.30438	3.4734	2.27066	2.77292	3.30724	1.65796	2.65079	1.78027	4.26913	4.91333	4.13053	2.41291	2.83233	2.5288	5.00426	2.48093	3.91745	3.82943	3.15567	3.45007	4.45762	4.2417	3.02057	2.19054	2.71953	2.93882	3.70384	3.26423	3.16022	3.60483	1.3085	3.1371
ENSG00000029363	BCLAF1	protein_coding	7.75811	7.00018	7.61292	6.68565	7.28547	7.05878	7.28004	7.01636	6.80152	7.76174	7.53346	7.14536	8.22975	7.38611	7.21052	7.25462	7.00349	8.33526	6.86042	7.25054	7.52115	7.24266	6.65064	7.72162	6.55003	7.30198	6.88179	7.60714	7.23325	7.15734	6.94248	6.68907	7.09311	6.28572	7.17364
ENSG00000029364	SLC39A9	protein_coding	6.19229	6.37689	5.9483	6.11688	6.39364	6.22651	6.38016	6.08514	6.04715	6.35563	5.90925	6.31453	6.51697	6.43859	6.27174	6.19728	6.0294	6.67932	6.14999	6.19232	6.36427	6.10742	5.97089	6.19168	5.64306	6.5659	5.89029	6.5836	6.4091	6.13779	6.12583	6.14387	6.00714	5.94425	6.23727
ENSG00000029534	ANK1	protein_coding	0.424239	1.92401	0.261893	2.25902	-1.15611	0.135302	0.846871	-0.108169	0.632167	0.923651	1.0172	1.3373	0.80605	1.22004	-0.0131234	1.13763	0.45117	-2.47103	-0.172424	-0.135786	0.452187	-0.154782	0.126556	0.822052	-0.182421	0.135251	1.81577	-0.0331724	0.292687	0.874899	1.21056	-1.82796	-0.340125	-2.41314	-0.383461
ENSG00000029639	TFB1M	protein_coding	1.77507	1.81654	1.43824	2.07734	1.57061	2.26306	1.91937	2.17998	1.6315	1.7272	1.62395	1.60795	1.0215	0.901718	1.89434	1.8506	1.84837	2.12922	1.5101	1.84236	2.06742	1.99145	1.85788	0.894899	0.883982	1.5869	2.02218	1.54233	2.23087	1.82404	1.78938	2.69395	3.04105	2.59056	2.40951
ENSG00000029725	RABEP1	protein_coding	6.27085	5.99821	5.88916	5.47512	6.02113	6.35942	5.99459	5.86304	5.98189	6.39978	6.12668	6.5016	7.32912	6.46026	6.13396	6.38939	5.54773	7.29645	6.51273	6.17117	6.51452	5.73888	6.21681	7.05732	5.06344	6.35715	6.18035	6.44707	6.22737	6.59084	6.10817	4.89497	4.92104	4.96363	6.66409
ENSG00000029993	HMGB3	protein_coding	3.42486	3.51379	3.87884	5.83576	4.5582	2.60118	3.40868	3.13746	3.17079	3.18714	2.96695	3.07061	3.70807	3.78181	2.7087	2.85163	3.06827	4.5448	2.98232	4.02375	3.13995	4.38847	5.42537	3.46546	7.11859	3.18534	2.22078	3.43975	3.03432	3.25531	2.58618	6.15294	4.2153	4.9681	3.48455
ENSG00000030066	NUP160	protein_coding	5.67146	5.46819	5.66191	5.66773	5.93548	5.67947	5.83403	5.5759	5.07568	5.70299	5.49287	5.69051	6.5036	5.93443	5.67049	5.58787	5.4605	6.62615	5.60244	5.58618	5.62417	5.52918	6.09234	6.27193	5.96005	5.83217	5.64419	5.77023	5.77787	5.88211	5.66987	5.76299	5.83194	4.79125	5.61491
ENSG00000030110	BAK1	protein_coding	3.59598	4.35135	4.0916	4.55617	4.15914	4.69461	3.4576	4.14101	4.59028	3.87011	3.05706	4.01061	4.62145	4.32695	3.24036	3.73236	4.02695	5.15217	3.86381	4.29801	3.8744	3.99161	4.8059	4.53182	6.01992	4.03326	3.27067	3.3728	3.6447	4.70436	3.35789	5.46056	5.70387	5.23093	3.98627
ENSG00000030419	IKZF2	protein_coding	4.04708	2.72175	3.4261	4.12869	3.5618	3.48733	3.66969	4.19032	1.4313	3.80227	2.85083	3.17979	3.00001	3.48081	3.53824	3.0372	3.26308	4.00417	3.69256	4.03717	2.59278	4.30181	3.2888	3.57297	2.99992	3.40574	3.04926	3.39096	3.5652	2.29459	3.76154	3.88281	3.68662	2.54347	2.34912
ENSG00000030582	GRN	protein_coding	7.39235	8.96471	7.95757	7.78235	7.68302	9.42303	7.79178	7.40479	8.7181	8.66295	8.01491	8.08796	8.02756	8.75287	7.309	7.73093	8.04769	7.63325	7.68717	7.43904	7.46746	8.41144	7.70566	7.3774	8.68735	8.52067	7.6053	7.82461	7.85709	7.88708	7.52893	7.92	8.10524	8.4341	7.63372
ENSG00000031003	FAM13B	protein_coding	5.68124	5.3534	5.43356	5.91149	5.13558	5.85088	5.87588	5.69741	5.02067	5.82495	5.58056	5.91489	6.33971	5.89282	5.66982	5.7397	5.45316	6.04738	5.54983	5.44126	5.494	5.96075	4.70204	5.89141	4.37584	5.88458	5.47322	5.7055	5.33341	5.60998	5.65065	4.75542	5.31239	4.28778	5.23057
ENSG00000031081	ARHGAP31	protein_coding	6.81491	6.23427	6.31353	4.82664	5.724	5.928	5.79015	5.52955	6.67363	6.35126	6.96899	6.46573	7.6847	6.75618	5.69406	6.23205	5.47196	6.75028	6.55317	6.10897	6.20776	5.37853	4.78931	6.97781	3.71198	6.40856	6.24688	6.52365	6.00114	6.76577	5.93939	4.19787	3.65495	4.52647	6.1783
ENSG00000031691	CENPQ	protein_coding	2.66345	1.93873	2.89016	1.62648	2.53701	2.13567	2.48902	2.59441	2.3682	2.34434	2.40581	2.20552	1.98	2.43732	2.23866	2.36195	2.24785	1.91339	2.14488	1.63202	2.70567	2.05466	2.79593	1.71981	2.0003	2.69998	1.86255	2.78965	2.72009	0.901507	2.40655	1.99454	2.4018	1.56582	2.53
ENSG00000031698	SARS	protein_coding	6.31613	6.66221	6.22503	6.31372	6.31621	6.291	6.2427	6.07915	6.71359	6.39312	6.51238	6.48097	7.16782	6.39241	6.10054	6.27555	6.40951	7.22965	6.21901	6.52941	6.55652	6.09083	5.69699	7.1032	7.16152	6.17427	6.39613	6.25224	6.20816	7.04808	6.17227	6.17536	6.69739	7.29942	6.96187
ENSG00000031823	RANBP3	protein_coding	4.78442	5.6834	4.71929	4.55466	4.7502	5.26665	4.97296	4.8727	5.56249	4.96678	5.31346	5.00173	5.12139	5.0171	5.03361	5.07938	5.26723	5.36928	4.95511	4.80278	4.9152	4.93837	5.38264	5.06253	4.86993	5.02939	5.16489	4.91514	5.05717	5.36553	4.8374	4.68313	5.38547	5.37911	5.38799
ENSG00000032219	ARID4A	protein_coding	5.387	4.67739	4.95366	4.8453	5.51025	5.24944	5.56496	5.31476	4.26837	5.25282	4.91368	5.43052	4.42741	4.78244	5.39492	5.57535	4.92782	5.08658	5.15062	4.82462	5.38803	5.29499	4.4543	4.96016	3.91819	5.37785	4.75994	5.75454	5.40067	3.9079	5.4689	4.12461	4.41029	3.69903	4.97612
ENSG00000032389	TSSC1	protein_coding	3.51952	3.63172	3.4787	4.04077	3.70096	3.53545	3.10009	3.0644	3.65747	3.38561	3.24514	3.05863	3.09816	3.28466	2.83186	3.14538	3.15868	3.33471	3.23173	3.40734	3.32803	3.25127	4.15102	2.69333	4.72275	3.48972	3.25614	3.03456	3.52922	3.20279	2.91792	4.36922	4.53062	4.43482	3.10094
ENSG00000032444	PNPLA6	protein_coding	4.95541	6.35853	4.60902	4.94208	4.54541	5.743	4.95035	5.11646	5.26186	5.30536	5.36905	5.35043	4.65732	5.43779	4.7523	5.17182	5.14765	5.09173	5.28852	4.77421	5.19366	5.38733	5.98272	4.68003	4.98809	5.28368	5.11424	5.10723	5.34587	4.98966	5.14387	4.96316	5.05025	5.14677	5.08774
ENSG00000032742	IFT88	protein_coding	3.68035	3.00659	3.34343	2.45963	3.17014	3.43079	3.76022	3.19092	3.80091	3.92486	3.82712	3.3953	3.81586	3.66156	3.3132	3.60551	3.10618	3.24505	3.38834	2.97139	3.7439	3.23966	4.01059	3.83913	3.7641	3.75026	3.57454	3.8275	3.62778	3.47938	3.61404	2.62346	3.20815	3.18368	3.68413
ENSG00000033011	ALG1	protein_coding	3.48419	4.85861	3.85061	3.90981	3.69807	4.15026	4.12067	3.86044	4.45724	3.85256	3.70144	3.67986	4.36175	4.12468	4.04946	4.01786	4.13571	4.47553	3.77927	3.575	4.21359	3.76472	3.98841	3.74375	5.35293	4.29543	3.62063	3.91481	4.35517	4.16561	3.70757	4.20459	4.12927	5.18819	4.23178
ENSG00000033030	ZCCHC8	protein_coding	4.53104	4.10935	4.26418	3.89317	4.29143	4.42004	4.31461	4.33253	4.49075	4.46473	4.71072	4.34512	5.0496	4.42791	4.33081	4.31055	4.33591	5.11469	3.97694	4.44018	4.53714	4.16938	3.92909	5.08994	4.17984	4.06347	4.41623	5.06968	4.02655	4.8222	4.09402	3.77491	4.59237	3.88368	4.48076
ENSG00000033050	ABCF2	protein_coding	5.04603	5.41917	5.43641	5.3228	5.03736	4.79684	4.83475	4.50321	5.41321	5.21075	5.14392	5.3736	7.51295	6.01737	4.81933	5.01238	4.78149	7.60245	5.405	5.5576	5.62775	4.66797	5.28955	7.12071	5.9561	4.92219	5.3978	4.70984	5.37251	6.87679	4.84183	5.85518	5.85195	5.7004	6.31332
ENSG00000033100	CHPF2	protein_coding	5.00767	6.53842	5.00835	5.08395	5.26118	5.31799	5.03068	5.06891	5.33543	5.22446	5.19145	4.98124	5.54686	5.64737	5.10275	5.27665	5.61315	5.54674	5.38798	5.41168	4.86949	5.25615	5.79291	5.15688	6.08103	5.65996	4.8804	5.04122	5.2419	5.27303	4.57909	6.02887	5.50643	6.32338	5.35382
ENSG00000033170	FUT8	protein_coding	4.88435	5.42048	4.69409	6.05678	5.35305	4.98762	4.68016	5.07549	4.74947	4.72211	4.4679	4.51924	4.86953	4.94415	4.55189	4.80205	5.09878	4.71807	4.34953	5.01437	4.77778	4.88348	5.34734	3.98807	6.38751	4.99454	4.16881	4.82952	4.75937	4.61474	4.20358	4.90243	6.56405	5.12827	4.21073
ENSG00000033178	UBA6	protein_coding	5.69386	4.80539	5.12726	5.0164	5.02243	5.20749	5.36791	5.06451	4.63758	5.31435	4.91127	5.75693	6.09661	6.25775	5.15936	5.19844	4.70413	6.14603	5.06155	5.21549	5.52894	5.22803	5.27221	6.15939	5.72811	5.52895	4.96769	5.21437	5.27378	5.31199	5.31923	5.19488	4.99975	4.22947	4.58426
ENSG00000033327	GAB2	protein_coding	5.59071	6.56	6.23325	5.90616	6.14183	5.63232	6.09011	5.55487	6.08665	5.62866	6.06015	6.49494	5.71562	5.722	5.2957	5.61635	5.45421	5.95568	5.47117	5.81379	6.25025	5.80076	4.9263	6.08804	7.30994	5.9201	6.07545	6.03849	5.8224	5.91513	6.22067	5.45155	7.04387	6.09612	6.45347
ENSG00000033627	ATP6V0A1	protein_coding	5.45815	5.81688	4.96819	4.92464	5.31775	6.38416	5.56402	5.31105	6.38277	5.80502	6.00405	5.89564	6.10017	5.83929	5.58201	5.92262	5.41914	6.38828	5.48814	5.36561	6.16233	5.32735	5.20647	6.17166	5.10088	5.95275	5.82091	5.81295	5.76013	6.41962	5.76774	4.82339	4.59622	5.71907	6.05848
ENSG00000033800	PIAS1	protein_coding	4.40918	4.40534	4.3022	4.70524	4.65516	4.67899	4.39634	4.53219	3.32736	4.61381	4.62493	4.53663	4.61815	4.3244	4.19423	3.99779	4.0013	4.61805	4.17743	4.45426	4.08384	4.68376	3.98617	4.67487	4.79969	4.70301	4.80255	4.96144	4.56872	4.30667	4.48975	4.35841	4.20692	3.75867	4.68998
ENSG00000033867	SLC4A7	protein_coding	5.02005	3.86153	5.62238	4.57119	5.37671	5.40603	5.00349	4.83444	3.49818	5.08568	4.00744	5.30675	7.49008	6.39363	4.70152	4.26091	5.13722	6.89436	4.72888	6.10834	4.9519	5.88577	4.77642	7.58037	4.26317	5.40858	3.94617	5.22073	4.97397	5.61903	4.76775	4.46417	4.08058	3.49963	3.87824
ENSG00000034053	APBA2	protein_coding	2.24498	1.32798	2.33556	2.2884	3.37199	2.83957	1.00881	2.09623	1.4313	1.27926	1.75895	0.873081	2.30997	1.62041	1.24238	0.886451	3.14313	2.08856	1.81194	2.70155	0.218509	3.52116	3.78467	1.23131	4.58974	2.55155	0.893216	1.35152	1.27513	2.031	1.03608	3.91759	2.16637	4.52445	1.95236
ENSG00000034063	UHRF1	processed_transcript	0.842115	3.58101	2.08721	3.30148	1.86639	1.28813	1.1544	1.94163	0.401073	-0.0323198	-0.829606	0.900204	0.80605	2.72741	1.07693	-0.276035	1.33111	-0.343268	0.632458	1.46727	-1.09558	2.73831	4.53915	0.32086	5.45533	1.84058	-1.23031	0.555143	0.807091	-0.570807	0.461451	4.03842	3.70577	1.48504	-2.57623
ENSG00000034152	MAP2K3	protein_coding	6.0318	6.03206	5.85333	4.85023	5.39821	4.96555	4.50312	4.53219	6.70172	6.12372	4.74772	6.93072	7.72059	7.24746	4.91604	6.23205	4.95182	8.1544	5.22814	6.46532	7.28343	4.69089	5.14262	8.14829	5.87686	5.34748	4.99856	4.92918	4.8685	7.59957	4.37834	5.03357	5.41194	5.80227	5.26979
ENSG00000034239	EFCAB1	protein_coding	-0.62525	-1.1586	-1.80169	-1.60099	-0.855422	-0.118977	-2.73357	-0.0689634	-0.950129	0.250887	0.0585058	-1.56974	-1.14232	-1.54529	-2.17194	-1.07618	0.807425	-1.72766	-1.57788	-0.957676	-1.5345	-0.579236	0.471758	-0.791786	-2.79722	-1.02354	0.330906	-1.04328	-2.5113	-1.59129	-0.844902	-1.19772	-1.65813	2.42721	-1.01636
ENSG00000034510	TMSB10	protein_coding	9.12508	9.75138	8.78296	8.81967	8.69381	9.06022	8.45035	8.26743	10.1517	8.95676	8.84206	8.71902	9.56568	9.33772	8.08396	8.64463	9.1598	9.44541	8.50908	8.90094	8.61425	8.86929	9.06685	8.64538	9.13795	8.79051	8.1883	8.63755	8.50436	9.0578	7.94489	9.32404	9.52819	10.1519	8.62319
ENSG00000034533	ASTE1	protein_coding	1.83238	2.21752	2.16264	2.4137	3.13641	2.976	2.94861	2.90124	2.46128	2.10454	2.63959	2.64297	2.59188	2.16795	2.6185	2.65335	2.9718	2.6177	2.4002	2.65356	1.93474	2.76556	2.83623	2.69333	2.68064	2.86345	2.74661	2.14456	2.49984	2.88716	2.71405	2.80075	3.04481	2.74424	3.09175
ENSG00000034677	RNF19A	protein_coding	6.8805	6.0148	6.4235	5.8289	6.71608	6.34014	6.53823	6.46578	5.72929	6.25372	6.20218	6.6647	6.82785	6.4433	6.02975	6.48669	6.52299	7.4553	5.94017	6.63249	6.87236	6.95179	5.42454	6.97571	7.37399	6.69976	5.85939	6.47607	6.01421	6.34039	5.97275	5.42819	5.84009	5.17537	6.3954
ENSG00000034693	PEX3	protein_coding	3.88384	3.43292	3.74415	3.26868	3.38641	3.77339	3.9965	3.50857	4.17527	4.05635	3.78555	3.93394	4.33784	4.29602	3.53824	4.12216	3.6771	4.48731	3.68328	3.48384	4.17489	3.91583	3.37682	3.69698	2.72464	3.95752	3.78144	3.94585	4.10442	4.27904	3.79237	3.01479	3.56868	3.37516	3.83761
ENSG00000034713	GABARAPL2	protein_coding	6.65433	6.47356	6.46553	5.43462	6.15241	6.41106	6.066	6.18379	7.22303	6.49049	6.2012	6.42312	6.76499	6.45909	6.08031	6.9378	6.5013	6.84639	6.64123	6.28243	6.95128	5.96193	5.5457	6.66328	6.62697	6.67429	6.00725	6.63736	6.43703	6.71745	6.33659	5.38977	5.67865	6.70718	6.47614
ENSG00000034971	MYOC	protein_coding	2.36637	5.80989	3.66531	1.33412	3.22732	-0.63949	3.17025	1.46882	5.47962	6.64625	5.93146	5.25122	4.51531	3.3713	4.22152	6.27615	0.193796	7.03073	4.39569	-0.520094	6.29379	0.355977	0.0936837	5.5583	-3.11399	2.39404	5.24064	3.93352	3.73591	7.10428	3.94009	-3.18157	-1.8686	-3.4576	6.70419
ENSG00000035115	SH3YL1	protein_coding	4.518	3.98367	4.91192	5.46148	5.09446	4.33197	4.14078	4.3307	4.12873	4.14549	4.00744	4.06256	4.09796	4.19064	4.37847	4.40063	4.52375	4.3607	4.35343	4.36766	4.88954	4.17142	4.79826	3.91406	5.31335	4.46911	3.79155	4.45323	4.21046	4.02748	4.20816	5.1942	4.41029	5.15854	3.81825
ENSG00000035141	FAM136A	protein_coding	3.85991	4.16986	4.53289	5.78318	4.59125	4.33378	3.91419	4.11784	4.40742	3.86662	3.81942	3.4048	4.04479	3.9634	3.92882	3.85214	4.42004	4.1397	3.80516	4.14028	4.04503	4.09187	5.58836	4.00463	5.7526	4.11727	3.74861	3.82417	4.12626	4.32645	3.81356	6.07583	5.29353	5.2334	4.48953
ENSG00000035403	VCL	protein_coding	8.10847	8.00816	8.27273	8.31605	8.50149	7.15354	7.60604	7.24334	7.71437	7.75065	7.83144	8.54359	9.29988	7.95994	7.59536	7.42984	7.8601	8.91995	7.57421	8.19669	8.03728	7.42755	7.44359	8.81834	7.46434	7.73185	7.84014	7.82001	7.74	8.54105	7.5731	7.67746	7.21464	6.92416	8.23095
ENSG00000035499	DEPDC1B	protein_coding	0.0423137	0.759814	1.22609	3.10078	0.266154	-0.42787	-0.869986	0.671093	-2.11507	-1.05	-2.43629	-0.0550558	-0.55997	1.32593	-1.13621	-1.07618	-0.278136	-0.584944	-1.35767	0.384561	-1.5345	-0.114493	2.84614	-0.394505	3.31563	-0.254274	-2.22772	-0.419569	-0.928956	-2.35602	-0.392529	3.53782	2.67873	-1.39141	-2.35918
ENSG00000035664	DAPK2	protein_coding	3.36785	4.6441	2.48995	2.53512	2.56896	1.67931	3.58415	3.39398	5.31271	3.39533	4.28049	5.4165	3.67665	3.26349	3.74043	4.00356	2.44673	5.22667	4.36701	2.99909	6.08182	2.59988	1.92482	4.57311	3.34007	3.22151	4.07591	4.70259	4.06977	5.22117	5.41643	0.984753	1.88488	2.17249	4.035
ENSG00000035681	NSMAF	protein_coding	4.96665	5.04531	4.76689	4.78987	4.8459	5.41377	5.14958	4.89518	5.10723	5.09168	4.5617	5.17414	5.99708	5.03282	4.93045	5.13817	5.04819	6.32952	5.25448	5.02249	5.32611	5.22998	4.7608	5.95738	4.60159	5.32479	5.05924	5.14517	5.29964	5.51302	5.06274	4.3193	4.12927	4.66309	5.16531
ENSG00000035687	ADSS	protein_coding	5.87356	5.10363	5.99483	5.71381	6.11556	5.63526	5.84557	5.49154	5.36785	5.77925	5.30797	5.36023	6.76722	6.1393	5.5785	5.49481	5.65943	6.116	5.28341	6.00762	5.57919	5.69917	5.19683	6.26679	5.8466	5.66325	5.32658	5.63583	5.72875	5.612	5.3496	6.10703	6.4466	5.28442	5.68758
ENSG00000035720	STAP1	protein_coding	1.44836	-1.28972	-0.085449	-1.40011	0.065742	0.322448	-0.79167	1.94163	-1.11955	-0.197929	-0.829606	-0.342351	-2.13449	0.874056	-0.539535	-1.28504	1.43692	-2.05199	-0.364245	0.981423	-1.71651	0.937966	-0.995806	-1.72287	-0.964254	-0.158174	-1.44141	-0.357621	-1.39794	-2.97645	-0.449098	-0.719258	-0.379944	0.498656	-2.83182
ENSG00000035862	TIMP2	protein_coding	9.94334	10.4655	9.67862	8.47834	10.0561	10.1333	9.22387	9.57288	10.2143	9.82787	9.92788	9.63569	10.4501	9.72811	9.80093	9.98821	10.0908	9.3782	9.34684	9.6122	9.62988	9.4648	9.1522	9.36024	8.98631	10.2379	9.9373	9.99008	9.36435	9.8892	9.46675	9.11361	7.62682	9.27894	9.4262
ENSG00000035928	RFC1	protein_coding	5.59279	5.75688	5.26197	5.10371	5.48786	5.50842	6.02534	5.70803	5.30645	5.6058	5.89038	5.75136	5.24866	5.50245	5.85722	5.64335	5.28269	5.94575	5.63087	5.15151	6.02313	5.49134	5.83205	5.47363	5.1741	5.4887	5.73552	5.99463	5.86127	5.41831	5.88322	5.58068	5.65298	5.43501	6.06084
ENSG00000036054	TBC1D23	protein_coding	5.50407	5.07226	5.36636	4.93513	5.65124	5.49874	5.54529	5.42529	5.00529	5.24478	4.90521	5.57533	6.14793	5.78462	5.31863	5.66714	5.06204	6.30422	5.43202	5.50447	5.82391	5.48069	5.24159	6.46572	5.42422	5.7252	5.00292	5.71184	5.60113	5.05037	5.50843	4.92051	5.74089	4.20193	5.15101
ENSG00000036257	CUL3	protein_coding	6.17924	5.43223	6.07572	6.09886	6.15452	5.93937	5.91946	5.86177	6.04965	6.05405	5.9201	6.26713	7.19303	6.69327	5.98374	6.08765	5.78246	7.35654	6.04889	6.26599	6.65	5.79284	6.10167	7.06688	5.96857	5.98993	6.04281	6.16127	5.96321	6.77119	5.871	5.77252	6.33034	5.59465	6.43588
ENSG00000036448	MYOM2	protein_coding	1.90097	1.64763	0.998007	-1.30927	0.968257	0.989672	1.79799	0.146228	0.831303	-0.257645	1.9498	2.48174	2.19045	0.492666	1.33857	0.519164	1.84837	1.74045	1.65631	-0.584415	1.64502	-0.238901	1.89651	1.65138	-1.67105	0.209184	1.12834	-0.419569	0.628173	2.57637	-0.0930399	-1.58599	-1.47449	2.03171	0.662937
ENSG00000036473	OTC	protein_coding	-1.302	-2.51018	1.9342	-1.83443	-0.924925	-0.159257	0.320983	-0.946659	-2.11507	-1.70734	0.0585058	0.350952	0.896125	1.3662	0.206734	0.195942	-2.4233	-1.72766	-0.526954	-3.06374	-4.08843	-1.26906	-2.2769	-1.72287	-2.79722	-0.41161	0.784034	-0.552068	0.392185	1.14364	-0.844902	-3.42549	-2.11511	-4.08843	0.95398
ENSG00000036530	CYP46A1	protein_coding	2.01676	2.15586	0.79965	-0.326418	-0.0459738	0.0671067	1.32229	0.624019	2.00574	1.66424	1.40809	0.817254	2.00046	1.46221	1.04469	1.9731	0.698165	1.08788	2.49513	0.482004	1.90353	0.139836	0.685388	1.81047	-1.95846	1.13457	1.48796	1.86168	1.7329	1.16576	1.39861	-0.32916	-0.0239697	-0.442535	1.05195
ENSG00000036549	ZZZ3	protein_coding	4.99987	4.50514	4.97212	5.51373	5.08675	6.00235	5.38592	5.16967	4.49809	5.15316	5.16332	4.78056	6.14104	5.15278	5.15464	5.02801	5.08392	6.21377	5.06394	5.08328	5.03527	5.04782	4.62649	5.90029	5.37872	5.22363	5.27203	5.15849	5.04958	5.27939	5.0269	5.36117	5.50916	4.89024	5.36148
ENSG00000036672	USP2	protein_coding	5.53245	3.83816	3.1204	1.63794	2.94515	3.29577	2.24148	0.76087	3.86477	5.09018	4.33193	4.63477	4.22505	5.54693	2.59087	2.47408	3.16383	3.38595	1.77749	2.5525	2.91581	2.67076	0.0600453	4.51652	2.24433	4.17145	5.01678	2.35345	3.49606	5.08125	2.4536	1.99454	1.34023	2.26249	2.40951
ENSG00000037042	TUBG2	protein_coding	4.39973	4.81539	3.11567	2.63	3.23531	3.67085	3.64526	3.55008	5.21139	3.85609	4.2076	4.13571	3.79259	3.23659	3.66557	4.50991	4.19974	3.72792	4.38238	3.20815	4.41794	2.90927	3.13977	3.46147	2.36043	3.77482	4.27061	4.37784	3.56164	4.96307	3.98616	2.56196	3.66232	4.11602	4.59242
ENSG00000037241	RPL26L1	protein_coding	3.35324	3.78621	3.0772	3.96999	2.95968	3.11337	3.40452	3.01508	3.70265	3.42412	3.12529	2.95896	3.57804	3.65345	2.86915	2.99154	3.41755	4.38188	3.16222	3.18422	3.45188	3.20824	2.923	3.37499	4.1081	3.29974	3.1022	2.99355	3.43125	3.61015	2.81358	3.76767	4.08972	4.24672	3.65012
ENSG00000037280	FLT4	protein_coding	5.33093	5.53631	5.67082	3.53086	4.19439	3.69082	5.21625	4.15142	5.62753	5.67031	6.38465	5.19893	5.65079	6.09356	5.01085	4.90413	4.40491	5.06578	6.19256	3.97158	5.08482	3.70124	3.86235	4.80657	3.29909	4.72049	5.52927	5.52097	5.7136	5.32187	5.16169	2.58687	3.22152	2.96879	5.41678
ENSG00000037474	NSUN2	protein_coding	5.58967	5.203	5.8419	6.07429	5.66165	5.13751	5.11569	4.9594	5.8082	5.35355	5.45111	5.61578	7.5559	6.54218	5.11736	5.39643	5.30964	7.6673	5.31578	5.91759	6.06341	5.35092	4.66336	7.17107	6.07132	5.44155	5.5431	5.4284	5.43218	6.79045	5.11976	5.50481	6.49177	5.23957	5.9616
ENSG00000037637	FBXO42	protein_coding	5.39059	5.43872	4.90919	4.55163	5.39554	4.70306	4.57877	4.55746	4.79488	5.36349	5.57751	4.89116	4.84712	4.25907	4.87538	4.89641	5.58465	5.00972	4.59844	5.03459	4.96897	5.41339	4.4942	4.79075	4.85587	4.96149	5.07835	5.95627	4.9222	5.00201	4.81506	4.68985	4.83886	5.34632	5.53669
ENSG00000037749	MFAP3	protein_coding	6.01488	5.48081	6.10648	5.88708	5.69026	5.44181	5.91143	5.4089	5.87175	5.97437	5.39433	5.96793	6.59385	6.81146	5.61326	5.83809	5.21861	6.58928	5.99118	5.88604	5.71125	5.30245	5.23501	6.15136	5.3639	5.96013	5.45107	5.88198	5.92427	5.937	5.63713	5.28201	5.23624	4.35069	5.49724
ENSG00000037757	MRI1	protein_coding	4.4279	4.8644	4.13203	4.83164	4.19439	4.34822	4.32563	4.48192	4.7678	3.87707	4.48748	4.19441	3.58483	3.84373	4.58027	4.29888	4.33591	3.8115	4.5819	4.18438	4.44258	3.57758	3.60971	3.76333	4.75947	4.12206	4.48263	4.38918	4.2574	4.1068	4.44388	3.96904	4.67728	3.99288	4.18936
ENSG00000037897	METTL1	protein_coding	2.71007	2.98548	3.22086	2.96178	2.90565	2.50135	2.4573	1.89282	3.98982	2.69871	2.58005	2.56036	4.74174	3.35137	2.12764	2.59349	3.08464	5.2908	2.61054	3.07393	3.34556	2.3348	2.96904	4.59149	3.7761	2.46366	3.13751	2.04487	2.79472	4.60668	1.76472	3.53569	3.83314	4.4604	3.36385
ENSG00000037965	HOXC8	protein_coding	-1.302	1.39356	0.701905	-0.568339	0.414218	1.17928	-0.230427	2.00731	-2.11507	-0.600097	-1.19526	-1.56974	0.101064	-0.848113	0.675228	0.519164	0.610422	-0.875415	-0.00313948	-0.342732	-1.09558	-0.579236	-0.28426	-1.45804	-0.550669	0.172691	-1.88091	-0.419569	-0.0120354	-0.897828	-1.00531	-0.392685	-2.2562	0.712448	-0.104794
ENSG00000038002	AGA	protein_coding	4.31681	4.03252	3.46387	3.4998	3.84101	4.15026	3.78917	3.70513	4.10007	4.14549	3.12112	3.1462	3.605	3.9469	3.68138	3.05395	3.42185	4.1838	3.16222	3.27312	3.63883	3.15567	2.71178	3.68676	3.56416	4.24799	3.18736	3.46569	3.56875	3.98146	3.66156	2.78648	3.30551	3.58738	3.30546
ENSG00000038210	PI4K2B	protein_coding	4.70608	3.92943	4.97343	4.5697	4.59281	4.86997	4.58061	4.55589	4.11924	4.47623	3.77762	4.57501	4.91333	5.12665	4.4859	4.43514	4.47075	5.31963	4.26915	4.69174	4.39287	4.59695	4.08147	5.07303	4.36397	4.75792	3.65868	4.38238	4.75158	4.07209	4.28821	4.08871	3.88025	3.03838	3.91776
ENSG00000038219	BOD1L1	protein_coding	6.79027	6.02777	6.17923	5.24343	6.23539	6.32013	6.32904	6.28986	5.3436	6.49219	6.11624	6.50712	6.71713	6.36969	6.39031	6.60652	6.0745	6.71732	6.17281	6.35389	6.43079	6.17704	5.9521	6.7688	5.71648	6.60751	6.26223	6.78842	6.41256	5.35954	6.58921	5.7923	5.43937	4.38671	6.01359
ENSG00000038274	MAT2B	protein_coding	6.02337	5.76929	6.03803	6.22627	6.10198	6.73055	6.77055	6.55946	5.99362	6.22741	5.67607	6.16321	5.53989	5.88418	6.50358	6.07265	6.26254	6.17545	6.0555	6.08073	6.02856	6.46153	6.02746	5.70816	6.67461	6.19603	5.68163	6.34656	6.46206	5.57529	6.43267	5.59355	6.86273	5.48779	6.0075
ENSG00000038295	TLL1	protein_coding	4.20732	3.56687	4.83476	2.43356	3.5618	4.10846	3.86063	3.23075	3.5556	4.4058	4.33734	4.20532	5.0348	5.38119	3.57538	3.91157	3.34691	2.52931	4.45503	3.73181	2.41603	3.11812	2.64528	3.91989	0.616831	4.17837	3.19652	4.60679	3.93877	3.70761	3.77704	1.82339	1.54549	2.65844	2.09708
ENSG00000038358	EDC4	protein_coding	4.86044	5.78668	5.13079	4.54099	5.051	5.01503	4.87432	5.11433	5.1381	4.72404	5.19542	5.11604	6.24754	5.45073	4.88906	4.82825	5.36989	5.84255	4.95895	5.15028	4.88156	5.02433	4.89206	5.76108	5.87686	4.94671	5.07753	4.96296	4.87281	5.57115	5.01519	4.99143	5.19195	5.7531	5.65755
ENSG00000038382	TRIO	protein_coding	6.84308	7.33072	6.61146	6.18047	6.98864	6.43788	6.03879	6.16747	5.90388	6.59442	6.98514	7.27243	7.99704	6.76844	6.97025	7.37617	6.47566	7.74703	6.70296	6.65225	7.15139	6.13013	5.90254	7.23326	5.76845	6.94667	6.93998	7.22441	6.8127	6.72305	6.96329	6.04245	6.24087	4.96214	6.75816
ENSG00000038427	VCAN	protein_coding	6.05456	8.37815	7.44205	6.11637	8.9397	8.21068	5.94184	7.89749	5.03335	5.6266	5.73935	6.47816	8.47508	7.7888	6.9828	6.47844	8.74691	6.51643	6.05968	8.25673	5.66197	7.51361	9.32799	7.14766	8.0326	8.5564	5.45107	6.34306	5.6991	6.88556	5.31817	8.67792	6.49865	8.51261	5.12761
ENSG00000038532	CLEC16A	protein_coding	4.93266	5.23316	4.45064	4.03211	4.70202	4.26124	4.79247	4.21237	4.11924	5.15316	5.06576	4.49276	5.28662	5.29386	4.58027	4.28239	4.11991	5.47164	4.66278	3.97437	4.40407	4.47683	4.45106	5.02786	4.50038	4.56022	4.88418	4.51456	5.21837	4.69108	4.43219	5.09638	4.67242	4.59544	5.51022
ENSG00000038945	MSR1	protein_coding	4.24475	5.38733	4.8982	5.93258	5.55161	8.62268	5.75551	4.86006	4.7433	7.00103	4.77453	6.07818	5.71871	6.97256	4.46474	4.7361	5.43731	5.06578	5.08874	5.27107	4.6496	7.39608	5.19295	5.33325	6.57728	7.8316	4.44214	5.60018	5.9353	5.19586	4.88823	5.05382	4.03589	5.34174	5.07265
ENSG00000039068	CDH1	protein_coding	3.85301	3.01356	6.6566	7.48305	6.29869	3.19152	3.68003	4.25161	3.76484	3.69611	3.16636	1.37646	2.27682	2.12165	4.36711	1.29625	4.1668	2.00363	2.5092	5.03993	2.5226	4.45692	5.36896	2.52759	8.05384	2.40195	3.83912	2.4432	3.18529	3.35012	2.96739	6.80664	7.73592	6.33033	2.19468
ENSG00000039123	SKIV2L2	protein_coding	5.91726	5.34927	5.7247	6.24043	5.8346	5.71333	6.13153	5.76135	5.69457	6.05482	5.71948	5.9273	6.7256	6.0686	5.99274	5.7483	5.42986	6.98161	5.89134	5.80362	6.21413	5.56606	5.4483	6.71784	6.25985	5.85033	6.02449	6.33605	6.31556	6.27002	6.00929	5.65128	5.67319	5.50428	6.47128
ENSG00000039139	DNAH5	protein_coding	-0.877595	-1.03841	-0.428674	0.642349	0.297008	-3.57109	-0.869986	1.01918	0.57777	0.0683872	-0.127507	-1.29907	0.174899	-1.703	-1.13621	-0.982096	-2.19535	-2.05199	-1.07988	-1.34645	-0.406665	-1.1022	-0.37337	-0.230548	-0.381229	-2.29932	0.683387	-2.39596	-0.575604	-0.725071	-0.285641	-0.0224053	2.68357	-0.264369	-0.72916
ENSG00000039319	ZFYVE16	protein_coding	5.80542	5.22418	5.59797	5.23308	5.69967	6.2226	5.86685	5.6223	5.08546	5.8366	5.52243	6.29167	6.65237	6.42435	5.75696	5.7371	5.23581	6.42549	5.76514	5.61153	5.90988	5.6771	5.19198	6.25531	4.12227	6.41444	5.34866	6.07615	5.86272	5.75108	5.68638	4.68313	4.54531	4.40878	5.11972
ENSG00000039523	FAM65A	protein_coding	6.45662	7.19821	6.14069	5.21119	5.94464	6.1899	6.05677	5.88317	7.39264	6.30493	6.59742	6.76724	7.24912	6.86689	6.1624	6.57543	5.97773	6.28747	6.25545	6.02927	6.65353	5.23194	5.36294	7.03835	6.01043	6.35104	6.23878	6.032	5.85765	6.60102	5.6707	4.99376	5.17659	5.98521	6.24816
ENSG00000039537	C6	protein_coding	4.77714	5.28448	3.6292	0.709063	5.11408	2.48184	5.77011	5.29705	4.3878	5.27407	5.6589	6.41551	4.19874	4.22936	5.80766	5.59647	2.74337	7.41475	4.00451	5.24355	7.24737	4.00539	1.44085	4.46362	-2.31772	5.67716	5.29424	5.62244	6.24078	7.6379	6.3086	-0.679101	0.208601	3.09392	6.47526
ENSG00000039560	RAI14	protein_coding	5.37741	5.52294	5.86184	6.28211	6.47051	5.38167	5.06398	5.33683	4.79488	5.08868	5.33163	4.95237	7.10782	6.31738	4.63271	4.60203	5.38208	5.08658	4.81633	6.14785	4.35299	4.84185	6.1976	5.57779	6.70709	5.6088	4.95155	4.59509	5.08594	5.09428	4.44388	6.6917	6.01675	5.53871	4.66852
ENSG00000039650	PNKP	protein_coding	4.00408	4.56566	3.63252	3.56428	3.74638	3.54801	3.48145	3.43547	4.58684	3.57724	4.0097	3.51856	3.79259	3.72874	3.50012	3.49534	3.97812	4.00417	3.72908	3.37388	4.00882	3.56833	4.00618	3.94298	4.98938	3.59689	3.81751	3.59664	3.77022	4.06916	3.57556	4.44044	5.2469	4.77944	4.04217
ENSG00000040199	PHLPP2	protein_coding	4.56102	4.70994	4.39113	4.12462	4.44395	3.80513	5.38908	3.87056	4.3996	5.50721	5.20826	5.04794	6.62382	5.0171	4.85462	4.61337	3.55316	6.66901	4.33381	4.89118	4.68904	3.56213	3.25946	6.49237	3.33603	4.07093	5.2325	4.9214	4.92497	5.32556	5.10388	2.91009	2.44802	2.40103	5.04793
ENSG00000040275	SPDL1	protein_coding	2.41409	3.0205	2.79263	4.30977	2.76377	2.56455	2.21327	2.82002	2.3193	2.12807	2.49233	1.57467	2.24289	2.758	2.25284	2.38861	2.59887	2.28129	2.24914	2.18871	1.73643	2.32018	3.63564	2.06316	4.2221	2.84037	2.19664	2.30639	2.26627	2.31453	2.24656	3.77672	4.67728	2.90812	2.31006
ENSG00000040341	STAU2	protein_coding	5.6103	5.203	5.32694	5.45582	5.40531	4.76491	5.37323	4.97003	5.07076	5.50385	5.10008	5.6168	5.77024	5.71811	5.01917	5.3777	4.50765	5.5411	5.46306	4.88079	5.88012	4.83672	5.05568	5.62762	6.32611	5.59508	4.85459	5.64437	5.49041	5.54818	5.38947	5.5677	4.64788	4.15571	5.01794
ENSG00000040487	PQLC2	protein_coding	2.32703	3.53816	2.45287	3.0286	2.53053	3.26185	2.7271	2.43308	3.4153	2.56722	2.89548	2.54326	3.31778	2.64798	2.62397	2.91413	2.95409	4.04193	2.78832	2.66744	2.84363	2.10671	2.86574	3.44135	3.48962	2.44848	2.81164	2.4776	2.70727	3.77031	2.37431	2.89687	3.33962	3.67374	3.70536
ENSG00000040531	CTNS	protein_coding	3.236	4.44712	2.87342	2.87243	3.10188	3.89885	3.86063	3.46248	4.461	3.46626	4.06504	3.64019	3.39705	3.56106	3.75046	3.80673	3.3649	3.77353	3.68018	2.545	3.82111	2.84432	4.58422	3.27391	3.49689	3.82271	3.9095	3.70221	3.70399	4.1407	3.66823	3.32971	3.01057	3.9958	4.21708
ENSG00000040608	RTN4R	protein_coding	0.59956	1.53589	1.11655	1.7688	1.3233	3.4443	1.13448	1.03726	2.10524	0.658803	1.52638	0.0455523	-0.973262	-0.0803983	1.01173	0.0252077	0.753829	-1.46303	-0.043635	0.35056	-0.863067	1.08361	1.44085	-0.230548	3.89637	1.7319	1.06308	0.148584	0.782851	0.0686584	0.366308	1.62116	1.78038	2.71621	0.449445
ENSG00000040633	PHF23	protein_coding	3.94358	4.35684	4.65382	3.91453	4.11653	4.51588	3.63466	4.22425	4.8418	3.74257	3.56988	4.48606	5.45538	4.7236	4.19973	3.82637	3.94562	5.44169	3.76469	4.31133	4.32381	2.79758	5.72141	5.30568	4.8143	3.41749	3.95519	3.43975	3.25303	5.19317	3.35376	4.82863	4.62668	5.07683	4.88469
ENSG00000040933	INPP4A	protein_coding	5.24911	4.97207	4.8982	4.95702	5.01201	5.57362	4.97716	5.29518	4.80676	5.23126	5.00933	5.26954	4.82436	5.64532	5.07609	5.06292	5.40073	5.08916	5.15845	5.24817	5.01716	5.30617	4.56186	4.99233	4.354	5.36982	4.78546	5.22199	5.12141	4.82394	5.07533	4.62317	4.57685	4.0218	4.80263
ENSG00000041353	RAB27B	protein_coding	1.95358	2.28819	1.70112	3.0883	1.53223	1.0439	3.22779	1.62043	-0.121803	2.79738	1.39433	1.71875	1.31068	3.30552	2.04043	1.83776	1.21691	-0.236091	0.632458	1.8786	0.690294	2.61194	1.73536	2.21314	3.26119	2.00528	1.07637	1.80863	3.20366	0.847791	3.09651	1.44158	0.777966	0.847825	1.07077
ENSG00000041357	PSMA4	protein_coding	5.87271	5.81289	5.97797	6.6254	5.75628	6.1585	5.90115	5.88067	6.40637	6.02381	5.54985	6.24284	6.49732	6.4649	5.76068	6.18466	5.98793	6.99885	6.10322	6.15464	6.54266	5.84421	6.00775	6.48404	7.56197	6.29749	5.76249	5.95246	6.48149	6.41328	5.84182	6.13052	6.24251	6.6495	6.13145
ENSG00000041515	MYO16	protein_coding	1.70006	1.25928	-0.175472	-1.83443	0.266154	-0.159257	2.16499	0.925223	2.43092	1.41931	1.29414	2.42684	1.27755	0.663978	1.10845	1.78521	0.698165	2.6177	2.01289	0.686639	3.07138	0.106135	-1.6025	1.83536	-2.79722	1.03644	1.42701	2.88882	2.07988	2.88049	2.84921	-0.126562	-2.11511	-0.00902101	1.73362
ENSG00000041802	LSG1	protein_coding	4.75507	4.50761	5.25983	4.83662	5.12487	4.71564	4.32563	4.36511	4.92314	4.49218	4.89914	4.47482	6.51697	5.08503	4.67676	4.58099	4.70413	6.58928	4.79926	5.1589	4.88356	4.35658	5.52428	6.32562	6.1056	4.57078	4.82044	4.24936	4.60547	5.83888	4.34754	5.60629	5.10627	4.94865	5.31093
ENSG00000041880	PARP3	protein_coding	4.38305	5.19536	3.76548	3.79421	3.4323	3.50999	4.46773	3.92012	5.07568	4.28544	4.43299	4.79147	4.22939	4.12761	4.27112	4.21447	3.5842	4.82404	4.34561	3.84603	4.51408	3.71248	2.92767	4.19696	2.21819	4.10764	4.52324	4.26914	4.77174	4.99585	3.62435	3.62059	3.94009	4.98141	4.96107
ENSG00000041982	TNC	protein_coding	6.11283	10.2265	7.77772	4.02994	6.22691	5.2638	4.57877	7.38882	4.43063	3.6683	5.5599	5.2003	8.0313	7.08428	7.16837	6.88923	5.78162	8.2491	4.47845	6.62095	4.59934	5.48316	6.01818	6.54283	6.05603	6.34644	5.60517	4.45754	3.90828	7.73287	3.65151	4.97658	4.06213	4.10795	6.4704
ENSG00000041988	THAP3	protein_coding	2.14672	3.17146	2.11596	2.29566	2.16288	3.18349	2.90224	3.22287	3.1523	2.2075	2.86587	2.84493	2.17254	1.38592	2.86915	2.74562	3.11684	3.40263	3.03188	2.72828	2.76766	1.9059	2.7492	2.58008	3.25692	2.53008	3.32458	2.62297	2.64811	3.32576	3.299	2.10215	3.01057	3.92713	3.71137
ENSG00000042062	FAM65C	protein_coding	4.71944	4.07645	2.79855	0.967064	2.17953	1.95878	4.71579	3.68521	4.41132	4.02223	4.91489	3.82493	2.19045	5.64839	4.22152	3.70079	2.9893	1.91339	4.33183	2.16934	3.97167	2.67076	1.31816	3.08447	-0.3289	2.85196	3.65868	4.58131	4.98597	3.22929	3.98882	0.867638	1.50233	-0.380669	4.1589
ENSG00000042088	TDP1	protein_coding	3.09674	3.28525	3.35151	4.0979	3.8039	3.31795	3.12048	3.35126	3.30242	3.18714	3.09584	2.98453	3.35796	3.59535	2.99678	2.99733	3.31025	3.37753	2.87778	3.63273	3.10607	3.4921	4.15501	3.02621	3.71198	3.11496	3.0117	3.44845	2.97671	3.34528	2.87248	3.96588	3.94413	3.81924	3.26925
ENSG00000042286	AIFM2	protein_coding	5.65765	6.52385	4.15299	4.73223	3.96146	3.90618	5.25367	4.75337	7.11973	4.95038	5.27173	7.31337	6.01227	4.12761	6.43218	6.65216	3.46418	7.30534	6.80056	4.89265	7.66711	3.58065	3.57738	5.99653	4.70874	5.31645	5.83515	6.19461	6.38111	6.68766	6.76813	3.47024	3.99366	4.41533	6.18209
ENSG00000042317	SPATA7	protein_coding	3.07909	3.08808	2.0775	2.61847	2.6667	3.97526	3.05841	2.96873	3.43072	3.35104	3.09584	2.67473	1.60588	2.32943	3.11403	2.97405	3.21926	1.63145	2.53004	2.12979	3.37431	2.82891	3.58035	1.94234	1.93759	3.23927	2.904	3.31691	2.95518	2.23307	3.42238	2.61944	2.56274	3.19388	3.09635
ENSG00000042429	MED17	protein_coding	4.42324	3.74911	4.28332	4.14485	4.71064	4.71564	4.26508	4.49506	4.51989	4.18247	4.54467	4.63073	5.50274	5.05455	4.38492	4.34499	4.54363	5.36715	4.10287	4.85979	4.75392	4.1447	4.22308	5.67321	4.63655	4.47475	4.75168	4.41381	4.47915	5.06369	4.25761	4.45405	4.2597	4.51838	4.58426
ENSG00000042445	RETSAT	protein_coding	8.52543	8.85441	6.36881	5.25557	6.62858	5.62789	7.09175	7.07114	8.62708	7.99431	7.74122	8.91988	9.14114	6.36349	7.92192	9.39537	4.92176	9.58395	8.73395	7.12354	9.6254	5.99511	5.45722	9.25708	5.01364	8.03333	8.01092	9.00004	8.5167	8.92883	8.63468	5.49113	4.93632	5.63639	8.94663
ENSG00000042493	CAPG	protein_coding	4.94245	6.48238	5.49777	6.32129	5.62412	8.62286	5.20674	5.20108	5.57643	5.03991	4.82798	4.03223	4.86396	4.71193	4.81694	4.33817	7.02451	4.97667	4.32787	5.37198	4.74954	7.25304	5.78585	4.83616	7.38701	6.45251	5.00031	4.56141	4.77788	5.33657	4.89677	6.57773	6.74907	7.20579	5.16421
ENSG00000042753	AP2S1	protein_coding	5.06558	6.23427	5.16443	5.09542	4.90342	5.86224	5.15701	4.72994	6.43056	5.57832	5.06359	5.11893	5.59809	5.60277	4.96853	5.549	5.54477	6.42038	5.38702	5.20957	5.73693	5.0969	5.10084	5.356	6.16211	5.58557	5.05505	5.25087	5.4351	6.0528	4.94284	5.90968	5.93392	6.347	5.72519
ENSG00000042781	USH2A	protein_coding	-3.41948	-2.87179	-3.11033	4.04723	-3.17429	-4.08843	-4.08843	-3.5676	-4.08843	-3.40916	-4.08843	-2.10416	-4.08843	-4.08843	-4.08843	-4.08843	-3.02789	-4.08843	-3.13262	-3.48696	-4.08843	-2.639	-1.96845	-3.48513	-1.95846	-2.52049	-4.08843	-4.08843	-4.08843	-2.97645	-3.50511	-1.82796	-2.7878	-4.08843	-3.14266
ENSG00000042832	TG	protein_coding	-1.43096	0.339357	-1.42524	-1.60099	-0.209807	-0.758207	-2.04739	-1.35461	-0.661349	-0.0854383	-0.251836	-0.342351	-0.821957	0.121305	-1.21207	-1.28504	-0.07051	1.12856	-0.526954	-0.342732	-0.487119	-0.375059	-0.797779	-0.394505	-0.742691	-0.468114	-0.736301	0.148584	-1.39794	0.0209175	-1.1858	0.498969	-1.0973	0.594185	0.477924
ENSG00000042980	ADAM28	protein_coding	3.61244	1.61134	5.12255	4.14685	3.68938	4.12951	1.67927	3.76332	0.784037	1.91471	1.64735	1.90435	2.13603	3.8003	1.82011	1.3515	3.83706	2.18814	2.7174	4.08449	0.926021	4.5771	4.44129	1.45658	5.39923	3.79296	1.71739	1.52599	-0.0120354	2.21197	1.73963	3.0659	4.83343	4.73647	0.95398
ENSG00000043039	BARX2	protein_coding	-1.90589	-1.28972	-1.54015	-0.198614	-0.0852212	-2.8906	-2.73357	-1.92549	-2.52712	0.0683872	-4.08843	-0.874531	-2.54434	1.68551	-3.24616	-1.66898	0.272133	0.481449	-1.70203	-0.0883763	-0.487119	-0.817149	0.126556	0.718822	4.08659	-4.08843	-2.22772	-3.00706	-2.09724	-1.32139	-1.09273	-0.0998096	1.42356	0.167011	-0.79578
ENSG00000043093	DCUN1D1	protein_coding	5.64371	4.51745	5.46462	5.44445	5.99314	5.44853	5.33228	5.21008	4.71837	5.68625	4.51318	5.45702	6.06298	5.75365	5.22015	5.59933	5.3108	6.35224	5.58346	5.67215	5.64791	5.58453	5.45722	6.04668	6.97539	5.70936	4.60806	5.9309	5.62348	5.15498	5.44872	5.09999	4.83343	3.98115	4.98855
ENSG00000043143	JADE2	protein_coding	5.45929	5.6834	4.97605	5.11503	5.15781	5.75863	5.33228	5.86747	4.92858	5.38927	5.98696	5.43748	4.08843	4.75427	5.70376	5.16155	5.73571	4.14962	5.57261	5.35814	4.76047	5.77619	4.43146	4.06111	4.27378	5.37284	5.45107	5.64437	5.51453	5.08995	5.24093	4.53523	6.0676	5.10278	5.83866
ENSG00000043355	ZIC2	protein_coding	-2.10673	-4.08843	3.69419	4.15485	-3.17429	-2.64203	-3.06094	-3.5676	-4.08843	-2.94919	-2.08836	-0.785399	-1.33384	-4.08843	-1.77683	-3.02671	-4.08843	-4.08843	-1.25901	-3.06374	-2.83016	-4.08843	-4.08843	-2.73365	-4.08843	-4.08843	-3.67811	-2.39596	-2.28947	-1.20329	-1.77044	-4.08843	-3.63864	-3.4576	-2.00376
ENSG00000043462	LCP2	protein_coding	5.41307	4.8644	4.73173	4.53181	4.83016	6.17378	4.19227	5.25132	5.91764	5.81321	5.00367	5.81954	6.15821	6.45618	3.74043	4.84118	5.27201	5.60556	5.05677	5.4473	5.69539	6.23909	4.43474	6.15322	4.6382	5.95678	4.36299	5.36665	4.77481	5.63398	4.64137	4.08143	3.85474	3.75867	4.19794
ENSG00000043514	TRIT1	protein_coding	3.21461	3.10775	3.70999	3.87391	3.91249	3.23101	3.36233	3.19898	3.50548	3.27405	3.29414	3.02205	4.19431	3.28466	3.16739	3.19153	3.50531	4.09421	3.13979	3.53771	3.17958	3.85879	6.96369	4.00188	4.33993	3.17615	3.43188	3.33579	3.45062	3.77391	2.79544	3.97692	4.47868	4.42403	4.00596
ENSG00000043591	ADRB1	protein_coding	2.49619	4.06307	1.32789	-0.568339	0.9294	0.200419	2.26915	1.81112	2.3682	2.06852	2.08445	5.26693	2.63175	1.30536	3.93762	3.96274	-2.69415	4.30411	4.01687	2.4112	5.17581	0.439537	-0.518291	2.87836	-2.12693	1.65462	3.59084	3.44411	3.80072	3.70761	3.52873	-1.82796	-2.11511	-0.720523	1.73362
ENSG00000044090	CUL7	protein_coding	4.8518	6.21928	4.96424	5.10681	5.58793	4.75681	5.15948	5.1809	4.85043	4.90854	5.33073	4.79509	4.72954	4.80825	4.94033	4.79874	5.03421	4.5448	4.54653	4.84918	4.80126	4.67661	5.84815	4.40247	4.2759	4.98799	5.19186	5.10035	5.09335	4.57603	4.81355	5.97563	6.32184	6.12173	4.99841
ENSG00000044115	CTNNA1	protein_coding	8.34548	8.47474	8.30481	8.10994	7.94208	7.72376	8.08416	7.31664	8.28614	8.29814	8.32072	8.27928	9.07277	8.48947	7.8901	8.08976	7.54267	8.94188	8.21855	7.91254	8.2067	7.51743	7.45212	8.76468	8.29646	8.06074	8.34048	8.19083	8.28392	8.68919	7.96904	7.82317	8.92513	7.9086	8.42376
ENSG00000044446	PHKA2	protein_coding	4.90621	5.55792	4.29803	4.55768	4.30287	4.38895	4.76034	4.41953	5.33338	4.91024	5.18746	5.53155	5.20306	4.51779	4.82527	5.1447	4.52375	5.56538	5.36785	4.66086	5.73139	4.47683	5.99612	5.70141	4.52013	4.85036	5.11826	5.40401	5.13225	5.64288	5.60449	4.41864	4.6651	5.01344	5.54007
ENSG00000044459	CNTLN	protein_coding	4.65139	3.72383	4.18951	3.64885	4.13586	4.23429	4.42941	4.05267	4.0105	4.73939	4.34808	4.03835	3.94281	4.64395	3.93322	4.18689	3.95158	3.75416	3.72908	3.81208	4.26668	4.29809	3.67506	4.01283	3.02527	4.50258	3.76307	4.52282	4.16194	3.39294	3.87246	2.81488	2.89854	2.49478	3.6963
ENSG00000044524	EPHA3	protein_coding	4.19372	4.39737	4.42407	3.23889	3.84624	4.42174	4.1054	4.41089	3.01575	3.62762	3.96385	4.29235	5.20306	4.67233	4.98879	4.64505	4.82437	4.37345	3.86107	5.2688	3.77872	3.72364	1.9977	3.6799	0.505955	4.93041	3.98192	3.97924	4.21726	4.0123	3.40253	1.11607	0.995871	1.8883	3.73221
ENSG00000044574	HSPA5	protein_coding	9.37948	8.85028	8.74962	8.23594	8.35947	8.37571	8.58683	8.19693	8.88368	9.00202	8.80614	8.4874	9.62831	9.48414	8.27157	8.26037	8.23552	9.80338	8.43951	8.57305	8.97008	8.34052	8.20626	9.14068	10.6102	8.43696	8.72122	8.22997	9.33131	9.28423	7.81467	9.35818	8.50659	8.89158	8.81451
ENSG00000046604	DSG2	protein_coding	6.49539	6.79251	6.57483	6.56251	7.14997	3.29577	8.12338	5.82257	6.47681	7.06031	6.75716	6.02449	5.87779	7.98985	7.2688	6.01678	4.63169	7.05071	6.35568	6.15525	6.41565	5.53315	7.38939	6.06784	6.55874	5.80858	6.33592	7.04575	6.88992	6.38586	6.76813	6.27996	7.51287	4.81292	6.66215
ENSG00000046647	GEMIN8	protein_coding	3.24658	3.98367	2.79855	2.74574	2.89561	2.46206	3.59877	2.8356	3.89289	3.56436	3.41152	2.95249	2.67056	3.03902	3.3132	3.22644	3.27263	3.12955	2.79981	2.47571	3.40807	2.65336	2.86086	2.84197	3.69312	2.91958	3.57454	3.25382	3.45829	3.65385	3.03597	2.35996	2.18696	3.93324	4.0564
ENSG00000046651	OFD1	protein_coding	4.73455	4.22495	4.06481	4.27349	4.25653	4.23429	4.16798	4.46866	4.49075	4.29846	4.48586	4.08046	4.29708	4.30122	4.18687	4.04045	4.9725	4.29073	4.01194	4.33326	4.11483	4.70924	5.38518	4.56196	4.20001	4.16914	4.22061	4.37556	3.982	4.24568	4.18279	4.27782	4.78698	4.78957	4.28514
ENSG00000046653	GPM6B	protein_coding	4.12657	1.80051	5.35535	3.01108	4.71779	2.35173	3.77637	2.85102	3.46859	3.0022	3.62395	3.3953	3.85569	3.70539	3.84239	3.00309	4.05768	3.63921	3.26112	3.65727	2.56312	2.61793	5.23595	4.27636	4.29894	3.15759	3.75895	2.88242	3.24861	3.99078	2.58618	3.76221	4.42192	2.63617	3.40522
ENSG00000046774	MAGEC2	protein_coding	-4.08843	-4.08843	-0.87992	-4.08843	-3.56014	-4.08843	-4.08843	-4.08843	-0.214763	-4.08843	-4.08843	-4.08843	-4.08843	-4.08843	-4.08843	-4.08843	-4.08843	-4.08843	-3.53278	-4.08843	-4.08843	-4.08843	-2.66974	-4.08843	-4.08843	-4.08843	-4.08843	-4.08843	-4.08843	-4.08843	-4.08843	4.93109	-4.08843	-4.08843	-4.08843
ENSG00000046889	PREX2	protein_coding	6.30668	5.14705	6.23871	4.24567	5.87925	4.85614	6.44629	5.65925	5.68173	6.24836	5.71326	6.65229	6.96684	6.62438	7.10726	6.17256	5.19618	7.36933	6.75591	6.01781	6.68714	5.3191	4.46558	6.78526	6.1466	6.32374	5.5401	6.85779	6.29856	5.94582	6.47271	3.87608	4.41175	2.3288	5.87725
ENSG00000047056	WDR37	protein_coding	4.47815	4.7872	4.4298	4.06644	4.09913	4.64137	4.85619	4.44515	4.04098	4.94708	4.60715	4.61853	6.06298	5.0028	4.69504	4.49567	4.55347	6.16326	4.32787	4.95055	4.55232	4.79238	5.55931	6.17897	2.51157	4.58299	4.36164	4.79924	4.44673	5.12566	4.50285	4.09017	4.82688	3.54417	4.85106
ENSG00000047188	YTHDC2	protein_coding	4.96345	4.35135	4.95764	4.52101	5.07901	4.75817	4.83166	4.53219	4.3719	4.88112	4.76654	5.15175	6.03723	5.64634	4.73851	4.99803	5.00009	6.19474	5.15398	5.41374	5.39787	5.10546	4.48472	6.05664	3.59834	5.05844	4.72027	4.9915	4.97931	5.24474	5.00469	4.08435	5.05773	3.60277	5.13545
ENSG00000047230	CTPS2	protein_coding	3.99783	3.66308	3.77452	4.51637	3.86952	3.97293	3.87571	3.87056	4.56952	4.00645	4.33193	4.05955	3.56437	3.71711	3.86564	4.17927	4.04658	3.93131	3.68947	3.70515	4.16505	3.86887	5.71196	3.46147	4.79969	4.04593	4.23549	3.98822	3.8217	3.99388	3.81956	3.97377	4.32308	4.50205	3.95875
ENSG00000047249	ATP6V1H	protein_coding	5.42476	5.35065	5.46089	5.2293	5.24939	5.79861	5.2743	4.79115	5.48332	5.51281	5.27924	5.43632	5.26987	5.29386	5.03464	5.61352	5.01441	6.0002	5.58512	4.87781	5.63964	4.92394	5.01456	5.33434	5.3895	5.38684	5.23916	5.90191	5.52644	5.55238	5.2697	5.07892	5.10447	5.31395	6.25075
ENSG00000047315	POLR2B	protein_coding	6.3111	6.25721	6.49409	6.45486	6.38783	6.45007	6.33941	6.27136	6.05588	6.37726	6.0898	6.42137	7.32203	6.7628	6.36484	6.38939	6.06077	7.23606	6.31372	6.5074	6.38278	6.34763	6.88362	6.97221	7.12446	6.50345	6.48416	6.4487	6.45776	6.71604	6.27298	6.78684	6.56208	5.97859	6.70381
ENSG00000047346	FAM214A	protein_coding	6.24865	5.1247	5.38123	4.87223	5.62792	5.04415	5.65248	5.22691	5.66715	6.40701	6.093	5.97671	6.5045	4.62954	5.75197	6.11385	5.27201	6.79519	6.38458	5.70531	6.20616	5.43391	4.36586	6.67712	3.53974	5.98796	6.05503	6.99545	5.9833	6.30221	5.67401	3.80531	4.15213	4.23689	6.53535
ENSG00000047365	ARAP2	protein_coding	5.38461	4.18846	4.52755	4.45127	4.62052	5.15815	5.49735	4.92825	4.0105	5.53608	5.00707	4.83077	5.96101	6.56831	4.67149	3.95086	4.60545	6.0002	4.19059	4.83542	3.87037	5.50271	3.3734	6.5602	3.80858	4.67393	4.7392	4.39818	5.36028	5.66343	4.31393	3.81939	4.34156	3.00979	5.33059
ENSG00000047410	TPR	protein_coding	7.2342	6.79504	6.84796	6.95383	6.76138	6.59636	6.87102	6.65914	6.62332	7.17521	7.29738	6.95679	7.72213	7.13688	6.79514	6.83694	6.40951	7.60605	6.85251	6.68758	6.89882	6.51307	7.26204	7.41091	6.41702	6.8986	7.19279	7.17483	6.9483	6.92135	6.84329	6.98475	7.87775	6.17806	7.33874
ENSG00000047457	CP	protein_coding	4.39499	3.59966	8.55876	6.12301	6.97051	2.31544	4.73906	4.57149	4.26837	5.44887	3.95216	4.21345	5.44236	5.07595	3.66822	4.2391	5.4479	3.7671	4.99188	6.52179	4.63779	3.66408	4.70068	3.44539	9.09804	3.59345	2.87386	4.26668	4.11902	4.34353	2.24656	7.44528	8.14524	6.5403	3.37146
ENSG00000047578	KIAA0556	protein_coding	3.91402	4.73334	3.99689	3.58219	3.81193	3.5972	3.7537	3.48571	3.33558	3.89774	4.48423	3.86334	4.18541	4.09203	3.78501	3.5826	3.49309	3.61077	3.50173	3.44005	3.43014	3.55278	4.14501	4.01556	4.21771	3.79896	4.07094	3.80059	3.95513	3.56509	3.77395	4.33164	4.6712	3.80266	4.0084
ENSG00000047579	DTNBP1	protein_coding	3.30343	3.71531	3.30649	3.0883	3.51664	3.77339	3.29214	3.27332	4.34365	3.27931	3.75626	3.80354	3.92152	3.68563	3.01769	3.53566	3.70561	4.33485	3.28176	3.51487	4.03426	3.43555	3.69163	3.72722	4.1685	3.37796	3.33843	3.52033	3.49233	4.19817	3.0866	3.65634	3.77086	4.32074	3.80145
ENSG00000047597	XK	protein_coding	-0.788485	-1.1586	0.726969	2.01718	-0.0852212	0.200419	0.211152	0.00639031	-1.53309	-1.05	0.313764	0.270087	-0.338326	-0.943332	-0.272617	0.311917	0.859101	0.350007	-0.172424	0.315738	-0.759505	1.1677	2.46425	-0.283157	-0.136723	0.209184	0.575187	0.271294	-0.0120354	-0.132586	-0.0486551	1.88496	3.04857	0.286233	0.804586
ENSG00000047617	ANO2	protein_coding	1.35366	1.59284	2.40708	2.7244	1.57061	0.81356	1.23144	1.34365	3.0561	1.49363	3.06142	2.35023	2.90558	1.70134	1.60488	1.53772	1.38498	3.09917	3.26112	1.22607	1.83899	0.975779	2.02411	2.16486	0.5899	1.97381	1.28539	2.11209	1.5439	2.19055	2.12589	0.933871	0.00723606	0.286233	1.58445
ENSG00000047621	C12orf4	protein_coding	4.17168	4.03252	4.24262	4.37457	4.09694	4.9538	4.07437	3.98443	4.35583	4.24567	4.06504	4.5323	5.2593	4.49754	4.09935	4.28002	4.07691	5.73634	4.11671	3.93189	4.37021	4.26602	4.16295	4.75532	4.55012	4.72365	4.03224	4.25433	4.33238	4.92305	3.89251	4.33777	4.50215	3.84212	4.30911
ENSG00000047634	SCML1	protein_coding	4.70416	3.13357	4.44688	2.80794	4.20256	3.19152	3.68689	3.41141	3.84187	4.24567	3.9189	4.45209	5.90245	4.85852	4.01244	4.0292	3.47664	6.34902	4.2357	4.60967	4.81601	3.85625	2.95538	6.00272	2.54701	3.93591	3.36576	4.6583	4.11174	4.76358	4.22182	1.62918	2.31094	2.1412	4.32683
ENSG00000047644	WWC3	protein_coding	5.79914	5.95813	5.9463	5.01421	5.87286	5.85783	5.39537	5.44912	5.94878	5.54812	5.82071	5.70308	6.59889	6.2287	5.47194	5.63131	6.09821	6.03806	5.8056	5.96611	5.63371	5.53156	5.46928	5.65585	4.93424	5.88529	5.51103	5.72532	5.58106	5.79432	5.49912	5.16692	4.09881	5.36563	5.4647
ENSG00000047648	ARHGAP6	protein_coding	5.3222	3.83029	4.30636	2.69727	3.627	3.07481	4.26279	3.59654	3.9095	4.87591	4.87951	3.6993	4.70171	4.41597	4.37847	3.6576	3.70208	4.24982	3.77346	3.97437	3.46263	3.45242	2.81118	4.60783	0.148092	4.07588	4.65089	4.43146	4.35311	4.15183	3.90667	0.351682	2.04381	0.768132	4.69151
ENSG00000047849	MAP4	protein_coding	8.72318	9.00799	8.30039	8.0211	8.08263	7.78425	8.0046	7.70363	8.80465	8.46618	8.58052	8.68286	9.12085	8.25004	7.96293	8.46891	7.92159	8.7031	8.70732	7.71541	8.65729	7.67262	7.93347	9.08355	7.66656	8.59225	8.61692	8.58774	8.36154	8.48799	8.14849	7.78185	7.28496	7.95076	8.79271
ENSG00000047932	GOPC	protein_coding	5.86328	5.40466	5.63237	5.11503	5.64151	5.94532	5.81304	5.79295	4.43828	5.94735	5.51291	5.66899	5.78799	5.65144	5.88251	5.81861	5.8098	5.69968	5.69457	5.30587	5.57796	5.36256	5.53885	5.31898	4.52191	5.96414	5.41751	6.03777	5.87781	5.18236	5.63798	5.48673	5.45219	5.5576	5.30001
ENSG00000047936	ROS1	protein_coding	-4.08843	-2.51018	-1.2197	-1.83443	-2.21921	-3.19109	-4.08843	-3.5676	-4.08843	-2.94919	-4.08843	-3.4182	-4.08843	-3.40714	-3.60668	-2.69275	0.272133	-0.875415	-0.710374	-4.08843	-2.46169	-2.639	-1.22541	-4.08843	1.01123	-4.08843	-4.08843	-3.44871	-4.08843	-3.42786	-4.08843	-0.528797	1.44651	-2.68495	-3.53939
ENSG00000048028	USP28	protein_coding	3.87704	3.8184	3.5819	5.674	3.99713	4.45047	3.8697	4.39871	3.58348	3.77645	4.11204	3.91412	2.9588	3.78552	4.04743	3.89616	3.94562	3.9932	3.71093	4.26872	3.52036	4.3203	4.54828	3.03698	5.025	4.34342	4.04243	3.76969	4.12867	3.55675	4.00207	4.74439	4.78586	3.88368	3.84856
ENSG00000048052	HDAC9	protein_coding	3.95007	3.57631	4.3022	4.67775	3.89243	4.24204	4.6853	4.97238	4.26837	4.14837	3.55759	5.07795	3.85007	5.06987	4.41044	4.2705	3.71616	5.6464	4.42937	4.54537	4.33555	4.22931	3.71613	4.12054	4.06963	4.29118	4.04074	4.25928	4.29216	4.80821	4.92625	4.14991	5.8833	2.63617	3.77012
ENSG00000048140	TSPAN17	protein_coding	3.95007	5.37385	4.49327	5.38193	3.66888	4.54751	4.33657	4.5433	4.90668	4.48764	4.1818	4.40553	4.89706	4.84077	4.25536	4.41799	4.43502	5.09173	4.80925	4.6781	4.60663	4.36729	4.73971	4.53373	6.04802	4.64258	4.28356	3.98224	4.56872	4.63073	4.01781	5.58275	5.97494	4.97255	4.53259
ENSG00000048162	NOP16	protein_coding	4.24211	3.06143	4.29384	3.4454	3.21121	2.31544	2.85433	2.16362	4.95015	3.70004	2.89058	3.60765	6.40061	5.13687	2.59644	2.97405	2.91189	6.74783	3.19305	4.31133	4.55734	2.75472	2.6339	6.29511	3.88534	2.79307	3.57688	2.4776	3.0648	5.90941	2.07665	3.91759	4.88474	4.28301	4.59079
ENSG00000048342	CC2D2A	protein_coding	4.43947	4.73966	3.87043	3.30508	4.01811	4.05664	4.20904	4.3104	4.64421	4.27494	4.6425	4.24818	4.18093	3.97321	4.21248	4.8037	4.15651	3.93131	4.05333	4.09222	4.56733	3.82552	4.17871	3.76009	3.48962	4.66902	4.68383	4.59313	4.26617	4.23787	4.3661	3.66025	3.37294	4.75036	4.11424
ENSG00000048392	RRM2B	protein_coding	5.53137	4.66859	5.48405	5.4918	5.50613	5.69438	5.50416	5.32768	4.72465	5.79954	4.62198	5.57743	5.52232	5.57405	5.23361	5.46067	4.86759	5.79911	5.41997	5.51218	5.34801	5.6178	4.54979	5.42116	5.77444	5.84961	4.8804	5.68449	5.65554	4.76539	5.53328	5.10431	4.01493	4.25161	5.16202
ENSG00000048405	ZNF800	protein_coding	5.31594	4.14151	5.05981	4.16479	4.71636	4.39765	4.50506	4.19234	4.12399	5.20938	4.29537	5.15738	6.85758	5.84553	4.30042	4.53995	4.4975	6.97674	4.52592	5.41888	5.26755	4.89092	4.10434	6.69932	3.3279	4.78235	4.6092	4.85427	4.30072	5.57529	4.30968	3.89616	3.70339	2.8383	4.52066
ENSG00000048462	TNFRSF17	protein_coding	0.59956	-2.22129	-3.11033	1.13823	0.135685	1.22694	-1.58428	2.43989	-1.79493	-2.08604	-1.28099	-0.342351	-2.13449	-2.59749	0.116579	-1.66898	2.17835	0.713081	-0.920557	0.543492	-2.83016	0.899135	-0.0458485	-2.04748	-0.0494523	1.31283	-2.87684	-3.00706	-0.639688	-2.97645	-1.50756	-2.97299	-0.46304	0.0370411	-2.17055
ENSG00000048471	SNX29	protein_coding	5.24383	5.87256	4.91056	4.30798	5.19412	5.79861	5.35505	5.15939	5.06336	5.68823	5.51211	5.8151	5.9584	5.35517	5.22015	5.4417	5.20744	5.75919	5.77827	4.98142	5.50184	5.50918	4.74104	5.62406	3.90732	5.62662	5.3865	5.76937	5.15957	5.50437	5.41445	4.94642	3.86116	4.78957	5.33156
ENSG00000048540	LMO3	protein_coding	5.34823	3.99075	5.34931	2.82308	5.11841	3.61223	5.19837	4.94271	5.73085	5.92571	4.91729	5.23799	4.42741	4.80093	6.2154	6.64803	4.71117	5.28631	6.41991	4.99936	6.80269	3.23966	4.79059	4.47554	-0.964254	5.44538	5.15161	6.36218	5.99456	4.87014	6.23645	-0.425528	1.52407	3.09392	5.33934
ENSG00000048544	MRPS10	protein_coding	4.61101	4.71208	4.71146	4.65818	5.23851	4.97953	5.01579	4.63519	5.04593	4.70852	4.57701	4.98916	5.49556	4.9156	4.68462	4.82011	4.71468	6.28297	5.16402	5.34848	5.54673	4.90813	4.67034	5.41395	4.767	5.29114	5.07588	5.06968	5.28892	5.46922	5.34024	5.08549	5.24772	4.80296	5.4495
ENSG00000048649	RSF1	protein_coding	6.36247	5.80487	6.18884	5.80113	6.38873	5.82207	6.39854	6.04549	4.87037	6.32033	6.05414	5.9347	5.88605	6.06555	6.30487	6.2259	5.71219	5.87429	5.96015	5.91104	6.07396	5.84549	5.6405	5.74228	6.80291	6.22528	5.79351	6.35468	6.18175	4.91491	6.0847	5.61389	5.87222	5.2868	5.75604
ENSG00000048707	VPS13D	protein_coding	6.42319	6.47103	6.42062	5.66283	5.92687	6.12744	6.45133	6.22923	6.10479	6.78866	6.9768	6.64278	7.14561	6.93457	6.76856	6.62812	6.08471	8.26715	6.81584	6.30978	6.60887	5.93339	5.35429	6.9051	5.0973	6.44153	7.20116	6.92554	6.60976	6.69385	6.68432	5.91666	5.73857	4.69756	6.95808
ENSG00000048740	CELF2	protein_coding	7.94634	6.77006	6.83361	5.15845	7.21376	7.0461	7.24563	6.62965	6.59021	8.06266	7.38044	7.43948	8.06355	7.62031	7.2816	7.28716	6.52998	8.20965	7.30917	7.07881	7.74127	7.70059	5.09773	8.25462	4.36198	7.2336	7.02684	8.03048	7.3518	7.34169	7.50145	4.84593	4.82907	4.22201	7.13084
ENSG00000048828	FAM120A	protein_coding	7.40775	7.49659	7.32535	7.11883	7.1136	7.25138	7.52874	6.97006	6.72615	7.56033	6.8148	7.40143	8.07504	7.654	7.34274	7.18629	6.92118	8.15101	7.31644	7.34395	7.59109	7.12401	6.8782	7.76983	7.29178	7.48472	7.01049	7.40363	7.57841	7.26468	7.21982	6.77107	7.05371	6.16126	7.21916
ENSG00000048991	R3HDM1	protein_coding	4.71563	5.01438	4.56452	5.13842	4.50304	4.36961	4.53195	4.46198	4.50539	4.54993	4.53215	4.69603	4.50461	4.66428	4.54182	4.66154	4.1668	5.12227	4.69851	4.36554	5.03167	4.44349	5.22556	4.4676	5.33175	4.8019	5.07339	4.73849	4.86562	4.62076	4.62947	5.12926	5.7269	4.09983	4.62462
ENSG00000049089	COL9A2	protein_coding	2.92294	2.44075	4.85622	4.20387	5.66683	2.48184	1.51949	3.58737	2.59053	2.08063	2.9623	0.139599	1.0215	1.93347	2.07276	1.00607	3.3195	1.76646	1.28333	2.17906	0.268371	3.03549	6.61887	1.28651	3.16411	1.69378	2.27367	2.16581	0.628173	1.18755	0.861008	6.34348	4.93733	5.92524	1.31132
ENSG00000049130	KITLG	protein_coding	6.09684	5.01438	4.70989	4.28811	5.03736	5.02967	6.14653	5.20709	4.40352	6.15627	5.1022	5.55521	6.49552	5.94527	6.23517	5.90656	4.826	5.43967	5.07225	5.06374	5.58166	4.09402	3.81776	6.27875	2.74919	5.38485	4.88418	6.25782	5.68691	3.89141	5.70432	2.67471	2.31094	1.25103	5.08079
ENSG00000049167	ERCC8	protein_coding	2.79902	2.63403	2.58897	2.47888	2.75824	2.7554	2.72043	2.94019	2.23394	2.64265	2.64541	2.70581	3.36586	2.81002	2.63484	2.82585	2.58359	4.18862	3.06082	2.793	3.46797	2.54434	2.46425	3.37074	1.7557	3.07102	2.77543	2.9876	3.4429	3.43908	3.37836	2.71294	2.70276	1.97368	3.15043
ENSG00000049192	ADAMTS6	protein_coding	1.86021	1.9533	1.9234	0.873212	1.77072	1.66785	1.1544	0.982329	0.735168	1.56431	1.29414	0.873081	1.68382	2.13337	1.48988	2.46576	2.61399	-0.136328	0.657935	1.85455	-0.0604759	1.52732	2.2196	1.07289	0.354184	1.98437	0.878116	2.07887	1.42363	0.326031	0.739715	0.695048	3.19466	-0.105807	1.21309
ENSG00000049239	H6PD	protein_coding	7.56291	7.85605	6.89468	6.72614	7.30173	7.31846	8.42059	7.05014	7.37281	8.29165	7.93622	7.42	7.85054	8.50969	8.18226	7.47564	7.0231	8.4204	7.26192	7.38022	7.69928	6.92969	6.315	7.6685	6.16667	7.29616	8.16311	8.09282	8.36257	7.79206	7.41172	5.7598	7.10307	6.5227	8.09851
ENSG00000049245	VAMP3	protein_coding	7.30393	7.01935	6.89779	6.52597	6.64965	6.87061	7.10076	6.47285	7.78472	7.46685	7.09557	7.47853	7.60264	7.32101	6.98466	7.24553	6.57992	7.81909	7.28152	6.7934	7.55073	6.59546	5.896	7.59183	6.31536	7.15012	7.21399	7.41449	7.22905	7.80907	7.35374	5.32583	6.52719	6.37136	7.57458
ENSG00000049246	PER3	protein_coding	6.38479	6.20413	4.67651	5.35179	5.04078	5.71194	4.87582	4.41436	5.70729	6.76354	5.17544	6.49049	5.58967	4.79356	7.00574	6.83007	6.1703	6.46871	6.34444	4.40541	6.46125	5.17619	4.29714	6.06915	3.7761	6.89441	6.8105	6.63402	5.65638	5.08706	6.93767	3.47914	4.70609	3.68464	4.32683
ENSG00000049249	TNFRSF9	protein_coding	2.93607	0.620687	-0.669057	0.793471	1.29301	0.989672	0.00719172	1.50824	-0.661349	-0.197929	-1.11434	0.18442	1.52348	1.46221	-0.867309	0.113099	0.884261	0.417224	-1.70203	2.04729	-0.974643	1.68402	-0.0458485	-0.579513	1.47578	1.26163	-1.60152	0.148584	-2.28947	-0.808865	-2.28459	0.867638	-0.340125	-1.27428	-2.00376
ENSG00000049283	EPN3	protein_coding	-4.08843	0.886697	2.39931	5.13539	3.07098	-3.57109	-1.72276	-0.877286	-1.31156	-0.319939	-2.89573	-0.969535	-4.08843	-4.08843	-2.02787	-1.82361	0.382198	-2.47103	-0.364245	3.11502	-0.123385	-0.753893	1.33232	-3.48513	5.27582	-1.2037	-2.22772	-3.00706	-1.39794	-2.12365	-2.76945	4.77	4.25321	3.4193	-1.48099
ENSG00000049323	LTBP1	protein_coding	5.41424	6.97004	6.35782	6.06476	6.5471	6.47454	5.01579	5.43043	5.87033	5.12421	6.43509	6.20663	6.85968	5.82672	6.12916	6.12579	7.27512	5.64815	5.50841	6.53699	5.59759	5.36968	6.69344	5.46768	5.58543	5.99712	6.60745	5.15185	5.38364	6.69147	5.11123	5.79942	4.38972	4.52445	6.81018
ENSG00000049449	RCN1	protein_coding	7.30867	7.70009	7.31403	6.88095	7.3022	6.86403	7.26837	7.23063	7.63751	7.07854	7.14572	7.38712	8.20958	7.93632	7.1679	7.53949	7.36024	8.40315	7.4229	7.32984	7.56045	6.93659	7.00571	8.10609	8.50657	7.50894	6.88321	7.25912	7.48524	7.86718	6.90806	7.17323	6.6263	7.31586	7.23254
ENSG00000049540	ELN	protein_coding	8.08711	9.97325	8.09747	6.09418	8.9561	7.5609	5.80676	8.64347	7.84534	6.98179	7.74054	6.97125	8.64769	6.86074	7.28786	7.70376	8.32983	5.61095	7.83985	8.04201	6.74552	7.34033	7.59697	6.67367	5.44221	9.40659	7.07233	7.70949	6.40414	7.42458	5.94968	6.0897	6.02201	8.97196	8.15995
ENSG00000049541	RFC2	protein_coding	3.51952	3.97656	3.90653	4.35387	3.35743	3.85654	3.55073	3.28849	4.2292	3.51168	3.52322	3.82846	4.27207	3.86847	3.10624	3.52769	3.78123	4.75101	3.45889	3.33529	4.18466	3.73195	4.38806	4.03449	4.6594	3.60033	3.48268	3.27841	3.30076	4.45775	3.34131	4.4831	4.73084	4.58965	4.39935
ENSG00000049618	ARID1B	protein_coding	6.85393	6.97675	6.37774	5.87926	6.04234	6.20535	6.2589	6.25166	5.58507	6.65285	6.58043	6.59845	6.64183	6.3384	6.43296	6.46075	6.35599	6.884	6.29456	6.20842	6.84078	6.11856	6.4019	6.5616	5.92614	6.37784	6.40669	6.82268	6.46634	6.17575	6.33187	5.78244	6.46041	5.47425	6.21682
ENSG00000049656	CLPTM1L	protein_coding	5.79103	6.35853	5.94096	6.62071	5.88433	5.98109	5.61792	5.88067	6.95278	6.00566	5.93146	5.97353	7.13293	6.10252	5.74384	6.00534	5.98865	7.15654	6.16894	6.1077	6.38984	5.82232	6.0996	6.55225	6.68101	6.00687	5.95828	5.89556	6.12803	6.70003	5.75763	6.32817	6.48832	6.50488	6.38604
ENSG00000049759	NEDD4L	protein_coding	5.06409	5.00916	3.19415	4.35213	3.98059	3.80251	4.60615	4.16793	4.97667	4.97329	4.82926	5.62292	4.74174	4.4724	4.97709	5.07254	3.14833	5.90682	5.2576	4.44422	5.90496	4.3203	4.77513	5.505	6.17065	4.18067	4.64644	5.47702	4.85403	5.31941	5.42728	4.85022	4.47729	4.1994	4.67469
ENSG00000049768	FOXP3	protein_coding	0.0423137	-1.1586	1.0585	1.49401	0.806125	0.0317608	-1.87596	1.52115	-2.52712	-2.94919	-2.08836	-1.56974	-1.81569	-3.40714	-1.21207	-2.42175	0.98073	-0.343268	-2.15523	1.55946	-1.22758	1.08361	1.46676	-1.87606	1.9588	-1.02354	-1.98751	-2.39596	-3.50738	-2.12365	-2.28459	0.840269	1.78038	1.82407	-2.17055
ENSG00000049769	PPP1R3F	protein_coding	2.00434	2.71322	2.95524	1.88877	1.57061	1.60911	1.51949	1.87283	2.56279	2.044	2.1596	2.11581	1.37475	1.9468	1.71138	1.96131	2.22833	1.84179	1.65631	1.5445	2.39374	1.81495	1.4922	1.96508	0.447148	1.69378	1.90041	1.33286	1.70737	2.19055	1.34971	1.96949	2.02106	2.81865	2.27802
ENSG00000049860	HEXB	protein_coding	6.68042	6.83984	6.40809	6.4287	6.68726	8.01754	6.55519	6.35573	7.06764	7.06565	6.74094	6.52955	7.03038	7.19951	6.27392	6.67986	6.96385	6.62171	6.39598	6.6003	6.67217	7.27737	6.29932	6.70144	6.62283	7.41272	6.45233	6.65437	6.59722	6.88848	6.30807	6.2008	5.49203	6.91571	6.61845
ENSG00000049883	PTCD2	protein_coding	2.59885	2.5015	1.83394	2.19063	2.36568	2.46206	3.06894	2.4801	1.65796	2.46008	2.25406	3.07061	2.52286	1.9468	2.96268	2.47408	1.91092	3.54467	2.95688	2.3175	3.38565	1.97288	2.05005	2.58742	2.05054	2.59357	2.72989	3.19302	3.43125	2.98371	3.23311	2.07305	2.12429	2.73729	3.38656
ENSG00000050030	KIAA2022	protein_coding	0.531966	-0.128243	-0.000714982	-1.83443	-0.394658	-0.00447293	1.69295	0.963544	0.269978	0.450676	0.783792	0.0455523	-0.146242	0.874056	1.07693	0.113099	1.17675	0.417224	-0.265149	0.127785	-0.572325	3.44e-05	-0.00968005	-0.453577	-1.43151	0.614859	1.11552	0.23154	0.854384	0.439324	0.299204	0.271986	-2.4126	-1.39141	0.758898
ENSG00000050130	JKAMP	protein_coding	5.49189	5.1784	4.78789	4.78601	4.99212	5.22716	5.50707	4.92825	5.48517	5.72822	5.20037	5.41885	5.02984	5.62264	5.30679	5.57438	4.77478	5.52785	5.30876	5.00893	5.59271	5.08614	4.596	4.65228	4.37584	5.4492	5.06174	5.65662	5.4273	5.24992	5.4085	4.54268	5.03519	4.66309	5.11633
ENSG00000050165	DKK3	protein_coding	5.72541	7.37333	6.44867	5.29048	6.44663	6.4362	4.96453	6.42559	5.24451	5.55897	6.35742	4.90796	6.68591	5.41997	5.6895	6.0253	6.69237	4.39861	4.19712	6.42964	4.31494	5.93159	6.07875	5.12947	5.31129	6.15277	6.16915	5.37123	4.90966	5.98133	4.4085	4.91314	4.54664	7.07702	5.8672
ENSG00000050327	ARHGEF5	protein_coding	4.708	3.86538	3.5681	4.89867	3.84884	2.64862	4.15073	3.64156	3.83609	4.37172	4.31559	3.97598	3.14484	4.09203	4.08951	3.68295	2.88721	4.44766	3.49114	3.241	3.80007	3.38727	4.6164	3.7105	4.56748	3.55143	4.70431	3.20846	4.44287	2.96491	3.10636	5.04261	5.00556	4.11333	4.69606
ENSG00000050344	NFE2L3	protein_coding	4.06513	3.5187	3.28977	4.08331	4.87558	3.94707	4.03462	4.33436	4.03089	3.98728	2.75716	3.08841	2.733	4.30899	3.26505	2.86435	3.43893	3.00399	2.42267	4.10247	2.23979	4.67517	4.04324	2.65888	4.31342	3.80195	3.11192	3.41778	3.53649	3.29097	2.87824	5.33322	5.37728	4.85049	2.50254
ENSG00000050393	MCUR1	protein_coding	4.71373	4.69701	4.5818	4.83786	4.80891	4.87745	4.60072	4.41953	5.53062	4.99903	4.54933	4.89285	5.27618	4.83898	4.59982	5.21094	4.30597	5.23368	5.27108	4.71197	5.37955	4.16734	4.88967	5.1507	5.34791	4.77324	4.37111	4.62991	4.58107	4.93597	4.57378	4.93352	5.69611	4.60884	4.71712
ENSG00000050405	LIMA1	protein_coding	7.63213	7.93525	6.94528	5.8314	6.99689	6.69674	7.76328	6.91276	7.76012	7.65724	7.61322	8.49465	7.68391	7.45424	7.61881	8.19374	6.6758	8.32927	7.41825	7.43448	8.50816	6.54683	6.17568	7.86431	5.91804	7.55906	7.51818	7.61513	7.85764	7.93556	8.13322	5.55197	5.20125	6.07351	7.77113
ENSG00000050426	LETMD1	protein_coding	5.72541	5.73597	4.71146	5.64092	5.24544	5.20253	5.88634	5.57744	6.20128	5.6152	6.01196	5.86413	5.0496	4.74667	5.89895	5.6201	5.22231	6.55798	5.54301	5.6496	6.53631	5.12977	4.50205	5.878	4.71498	5.0918	5.89076	6.12104	5.72478	6.47492	6.24484	4.92378	5.72807	6.35554	6.94188
ENSG00000050438	SLC4A8	protein_coding	0.307814	0.759814	0.977267	3.0286	1.68	2.02319	-0.79167	0.146228	0.921431	0.162521	0.845779	0.270087	0.101064	0.492666	0.543026	0.728447	1.41982	0.481449	0.0362503	2.17906	0.408382	1.01263	2.6339	0.846746	2.12747	0.931141	-0.0187952	0.148584	-0.344431	0.364792	-0.0930399	1.0339	0.964415	0.124975	0.232599
ENSG00000050555	LAMC3	protein_coding	2.01676	0.759814	4.20297	1.92664	0.64758	-0.821442	1.85996	1.65596	0.462409	1.05217	3.21806	0.952968	2.90558	2.85317	1.57133	1.47275	1.79631	0.205378	1.40869	1.85455	0.363205	-0.114493	1.1202	2.38314	2.73696	0.244776	1.81577	2.3254	1.23995	0.510194	1.56496	1.20459	0.625427	1.64231	0.586532
ENSG00000050628	PTGER3	protein_coding	7.6707	7.21645	5.95627	3.89556	6.30012	5.9747	8.48493	6.64484	7.56944	7.7961	6.53842	7.8992	7.55547	7.35142	7.71139	7.76715	5.87949	8.78451	8.00716	7.16662	8.43176	5.81713	5.23029	7.76376	3.39556	6.87253	7.2887	7.66681	8.416	7.51674	7.77316	3.52498	3.16383	4.97255	6.96658
ENSG00000050730	TNIP3	protein_coding	0.386465	-1.43395	-1.03983	-0.516601	-0.496798	0.461763	-1.87596	0.00639031	-0.536091	-1.05	-1.68625	1.90435	4.34585	1.42457	-1.66599	-0.0683875	-1.8254	1.86605	-1.46358	0.315738	-0.330462	0.466348	-0.926733	2.70688	0.534483	0.057324	-1.68877	-1.96803	-1.92765	1.86517	-2.50674	-1.51358	-1.47449	-1.27428	-3.14266
ENSG00000050748	MAPK9	protein_coding	5.53137	5.22568	5.22286	5.15746	4.8537	5.23592	5.32461	5.05123	5.72617	5.57511	5.38305	5.57323	5.34176	5.44838	5.29313	5.67257	5.03702	5.8862	5.59669	5.1	5.8579	4.95621	4.73306	5.59338	4.37387	5.52624	5.47823	5.54752	5.54908	5.55448	5.47176	4.82688	5.02284	4.72244	5.4771
ENSG00000050767	COL23A1	protein_coding	0.224627	1.03106	2.50452	1.37579	2.90565	-0.758207	1.35709	0.112519	1.57708	1.81678	0.943516	-0.220487	1.0215	1.46221	0.318796	-0.454084	1.17675	-0.459051	-0.0853001	0.865822	-0.662882	1.0307	1.58973	-0.337757	1.68111	-0.468114	0.683387	0.23154	1.02943	0.978507	-0.569358	5.46673	4.30592	2.62866	-0.435626
ENSG00000050820	BCAR1	protein_coding	6.1875	6.84033	6.22448	4.69705	5.59027	4.91067	5.21507	5.24744	6.09393	5.63278	5.77762	6.01522	7.67161	6.72265	5.29998	5.58403	5.5199	7.58108	5.13369	6.3388	6.46192	4.58017	4.93212	7.32427	5.95214	5.66325	5.49689	5.06403	5.04449	7.1263	4.5451	5.42646	4.65651	6.31989	5.2534
ENSG00000051009	FAM160A2	protein_coding	5.23987	5.8716	4.78789	5.03711	4.91838	4.59672	4.8833	4.53378	5.46095	5.30277	5.47582	5.02039	5.25293	5.01868	4.73977	5.17438	5.1254	5.65339	4.73188	4.59885	4.98023	4.37792	4.52843	5.28663	3.50772	4.81083	5.04832	5.14517	4.68447	5.40791	4.72365	4.44953	4.91179	5.04196	5.39827
ENSG00000051108	HERPUD1	protein_coding	7.93861	7.50928	6.92343	6.17458	7.26684	7.23496	6.9586	6.89738	7.07502	7.43243	7.60541	6.66371	6.75674	7.30362	6.99656	6.8325	7.95016	7.73185	7.29249	6.99909	7.13048	7.42819	6.06239	7.07735	6.92038	7.74492	7.20759	7.43131	7.40264	6.99037	6.99743	6.01861	5.78994	7.10398	6.79823
ENSG00000051128	HOMER3	protein_coding	3.21998	5.2888	3.23404	2.8821	3.73797	4.89723	3.3011	3.85536	4.31899	3.73493	4.15348	3.31191	4.07885	3.79662	3.59499	4.00068	4.03258	3.27254	4.07949	3.53393	3.89439	3.51796	4.28263	3.73054	4.79969	4.44637	3.63193	3.65039	3.65141	3.52287	3.41843	4.84335	3.58687	5.1296	3.23212
ENSG00000051180	RAD51	protein_coding	-0.34553	1.71758	0.868843	2.32431	0.234626	0.564273	-0.230427	0.273701	0.735168	-0.852918	0.159592	0.0455523	-0.338326	1.12936	-0.444968	-0.454084	0.516995	-0.722881	-0.710374	-0.184806	0.316567	0.49267	2.67892	-0.230548	4.0914	0.441652	-1.44141	-0.357621	-0.291995	0.159647	-0.633468	1.80227	2.89437	1.32716	-1.01636
ENSG00000051341	POLQ	protein_coding	-0.410541	0.975034	1.19049	2.91073	0.0294561	0.168228	-0.230427	1.01918	-0.121803	-0.453228	-1.11434	0.139599	-1.14232	1.17541	-0.193594	-0.332977	1.17675	-2.05199	-0.646607	-1.13901	-0.406665	0.236457	3.34574	-1.04077	3.10827	0.244776	-1.68877	-0.0824294	-0.398845	-2.63314	-0.138834	3.90774	3.90117	-0.507173	-1.27687
ENSG00000051382	PIK3CB	protein_coding	5.20503	4.65751	4.56452	5.51606	5.15149	5.25329	5.08877	5.0049	5.37783	5.18575	4.9233	5.57112	4.56422	4.77311	4.83119	5.07254	4.43714	5.74454	5.2461	4.4422	5.98263	5.18529	5.17931	5.01702	5.01364	5.17141	5.32867	5.3505	5.43704	5.00047	5.61143	5.96735	5.2063	4.7136	5.06093
ENSG00000051523	CYBA	protein_coding	6.41618	7.14961	6.21787	6.83003	5.70256	7.57036	6.0341	6.53859	6.54928	6.92165	5.69794	6.6642	6.47922	7.10637	5.47194	6.10517	7.06668	6.34363	6.1567	6.69987	6.18116	7.15756	5.86347	6.27875	8.31739	6.87431	5.60861	6.12104	6.2846	6.06977	5.70432	6.53168	7.22359	8.01042	5.53669
ENSG00000051596	THOC3	protein_coding	3.67252	3.83423	4.11789	5.61579	3.5713	4.01652	4.3774	3.28472	3.94217	4.32414	3.86254	3.27612	3.51547	3.33117	3.3132	3.4706	4.01561	3.92555	3.30613	3.85818	3.11972	3.64073	5.83329	2.77279	5.83016	3.65757	3.78144	3.70584	3.46592	3.7811	3.42238	6.01326	6.49693	4.75208	4.45054
ENSG00000051620	HEBP2	protein_coding	6.62168	6.44097	6.0349	4.80774	6.15241	5.02068	7.17578	6.29879	7.83885	6.74797	6.6374	7.07718	7.03162	5.67968	6.87865	6.59893	5.39308	8.96715	7.4229	6.82082	8.02374	5.61256	5.01785	7.34093	5.12218	6.14278	6.93292	7.35416	6.87852	8.35849	7.23393	5.41491	6.36011	6.12173	8.47686
ENSG00000051825	MPHOSPH9	protein_coding	3.7784	3.61807	3.30233	4.07279	3.37922	3.74911	3.91127	3.84513	2.83043	3.78758	3.29043	3.42361	3.47219	3.79293	3.61981	3.68654	3.13791	3.93131	3.65825	3.37388	3.9141	3.98467	3.83028	3.26478	3.73674	3.81088	3.57454	3.57297	3.95242	3.62619	3.66823	3.29232	3.91563	2.31016	3.37146
ENSG00000052126	PLEKHA5	protein_coding	5.17349	4.97207	4.75476	4.61389	5.40708	5.27612	5.0076	4.75747	4.26837	5.21762	5.42681	5.11025	4.41984	4.59819	4.98242	5.19214	5.18988	3.9987	4.09356	4.99524	4.76915	5.22607	5.44015	4.77315	4.45633	4.99061	5.43632	5.35975	4.58107	4.49098	5.05259	4.54268	5.0854	3.67009	4.77851
ENSG00000052344	PRSS8	protein_coding	-0.478621	-0.638164	5.36835	5.43298	4.59125	-4.08843	-2.04739	1.26912	1.98499	-1.54974	-2.08836	-0.407375	-1.55474	-2.94625	-2.332	-0.982096	1.76955	0.0446181	0.89065	3.86422	0.65324	2.25247	6.19664	-0.646859	5.73811	-1.52477	-1.88091	-1.37029	-2.09724	-0.0795823	-3.09089	6.67388	6.18483	5.1296	-0.333116
ENSG00000052723	SIKE1	protein_coding	5.6103	4.94681	5.25229	5.72123	5.30926	5.20848	5.44676	5.52955	4.55199	5.4026	4.52111	5.45245	5.49915	5.38487	5.4124	5.3576	4.90802	5.66034	5.405	5.27334	5.56928	5.3419	6.82662	5.3731	5.32666	5.73305	4.79855	5.54042	5.68854	4.98811	5.40251	5.15378	5.21301	4.21951	5.06328
ENSG00000052749	RRP12	protein_coding	4.68678	4.84108	5.24255	5.14345	4.73197	3.347	3.39618	3.26183	4.85043	4.06551	4.04976	4.4475	7.4851	5.97731	3.44561	4.60013	4.01845	7.05533	3.88284	5.31251	5.47819	4.36195	4.36242	7.1793	5.76017	3.70945	4.24435	3.91481	3.87427	6.03339	3.02043	5.23615	5.31161	5.10954	4.7984
ENSG00000052795	FNIP2	protein_coding	7.1999	5.88211	7.08481	5.22075	6.89972	6.76895	6.01516	5.49481	5.51804	6.95738	6.17074	7.03153	8.59823	6.95121	6.20176	6.41177	6.34017	8.60763	6.07513	7.037	6.82473	6.99069	4.5916	8.47914	4.45446	6.66035	6.23323	7.3323	6.63537	6.94553	6.52091	3.57358	3.0297	3.32033	6.19179
ENSG00000052802	MSMO1	protein_coding	5.8081	4.0083	4.42023	5.7532	4.8209	4.8637	4.67844	4.61125	4.6541	4.80836	4.50679	5.63508	6.15137	5.33629	4.76966	4.44365	4.65381	6.98369	4.09589	4.84002	5.05316	3.90116	4.27349	6.3007	7.34987	4.7533	4.2735	4.22173	4.7343	4.92629	4.51953	4.36443	4.11322	4.179	4.18289
ENSG00000052841	TTC17	protein_coding	6.48817	6.27472	6.03741	5.82075	6.27999	5.66079	6.25486	5.74837	6.52702	6.50404	6.60789	6.43186	6.93599	6.7046	6.30572	6.40743	6.03573	6.96345	6.18052	6.07228	6.64883	5.88639	5.67007	6.59341	5.88727	6.17831	6.21306	6.52056	6.1996	6.56766	6.2167	6.23437	6.55385	5.76598	6.09915
ENSG00000052850	ALX4	protein_coding	-1.72963	1.39356	-2.53274	-1.49705	-2.40535	2.02319	0.248699	0.333449	1.40029	-1.70734	0.719021	-1.07124	-0.821957	-0.848113	0.422777	0.911181	0.0676873	-4.08843	-0.777089	-1.88028	-1.37289	-2.07792	-1.96845	-0.717503	-3.52046	0.501728	0.437758	-1.63842	-0.0550831	-0.570807	1.07671	-4.08843	-3.01975	-2.41314	-1.59501
ENSG00000053108	FSTL4	protein_coding	-3.41948	-2.51018	-1.95271	1.02058	0.717672	-0.821442	-4.08843	-2.88407	-2.52712	-2.32064	-4.08843	-2.96235	-3.11898	-2.082	-3.24616	-3.02671	-1.67082	-1.2395	-2.15523	-2.05155	-2.16845	-0.114493	1.23015	-2.04748	1.32062	-3.51195	-2.87684	-3.00706	-4.08843	-3.42786	-4.08843	-0.0998096	-1.16526	-0.00902101	-2.00376
ENSG00000053254	FOXN3	protein_coding	8.11101	7.61444	7.44866	6.13519	7.73359	7.18882	7.83524	7.23455	7.57162	8.09771	7.71205	8.17261	7.95476	7.58902	7.51143	7.97239	7.11928	8.48645	7.8461	7.74024	8.40258	7.41104	6.23765	8.09034	5.31129	7.63961	7.68799	8.41007	7.50158	7.79783	7.87442	5.62746	5.09542	5.64385	7.80349
ENSG00000053328	METTL24	protein_coding	0.566159	1.23564	0.483981	-0.925093	0.469436	0.262723	0.691943	-0.148471	-0.536091	0.782548	0.962293	-0.342351	0.709975	0.75778	0.737048	-0.893772	-0.895787	-1.2395	-0.84704	-0.874898	-1.71651	0.0716277	1.16835	0.00706981	-2.31772	-0.863391	1.07637	-0.133428	0.572696	0.927633	-0.569358	0.769485	0.336963	0.396351	-0.489748
ENSG00000053371	AKR7A2	protein_coding	4.83613	6.03378	4.72397	4.89031	4.51785	5.07378	5.06529	5.01177	5.72304	4.82285	5.14083	5.06602	4.72032	4.75047	5.03771	5.09295	4.83086	5.26822	5.03384	4.82617	5.48216	4.48669	4.53762	4.78916	5.94486	4.79741	4.91225	5.16246	5.04194	5.35954	5.01519	5.01074	5.11167	6.22732	5.23371
ENSG00000053372	MRTO4	protein_coding	4.39022	4.64634	5.07697	4.81027	4.5897	4.42855	4.53195	4.17407	5.20916	4.42966	4.24259	4.51924	6.90919	5.48313	4.42146	4.43301	4.91414	7.24418	4.5819	5.36773	5.42423	4.43842	4.55282	6.6383	6.3836	4.37588	4.66745	4.12198	4.67462	6.1131	3.99943	5.07599	5.60343	5.58596	5.37763
ENSG00000053438	NNAT	protein_coding	3.64879	3.26787	1.97662	-0.516601	0.694684	0.434955	2.80478	0.982329	4.67369	1.94151	0.962293	3.69543	4.01495	2.83893	3.09054	2.33479	-3.02789	4.94855	3.59371	1.52938	3.17305	0.937966	-0.200335	4.37938	-3.52046	2.54443	3.26777	3.04606	3.68122	4.65634	4.98214	-0.528797	-3.01975	1.55002	2.53679
ENSG00000053501	USE1	protein_coding	3.99469	4.08639	3.57846	3.62889	3.17845	3.3032	3.55073	3.57814	4.55551	3.73493	3.3874	3.96959	4.13542	3.36634	3.57538	3.87117	3.80777	4.63932	3.89361	3.54525	4.48538	3.13075	3.18339	4.18005	4.17078	3.5443	3.68929	3.8572	3.63795	4.21683	3.80452	2.76481	3.3908	5.32095	3.86213
ENSG00000053524	MCF2L2	protein_coding	-0.410541	0.247757	-0.04246	-0.796122	0.0294561	-0.42787	-1.45793	0.146228	0.337014	-0.257645	0.254057	-0.701454	-0.239089	0.0239757	-0.118676	-1.17683	0.933302	0.865261	-0.043635	0.913179	0.166862	3.44e-05	-0.518291	-0.717503	-0.886557	0.209184	-0.167537	-0.776868	-1.39794	-0.244818	-0.186129	-0.986953	0.153878	-0.574844	-1.18471
ENSG00000053702	NRIP2	protein_coding	2.35664	3.64972	2.49725	2.4003	1.43848	4.30446	3.4576	3.46916	3.89289	2.09263	3.03505	3.1462	2.89469	3.2147	3.22606	3.64291	4.394	1.48248	2.76507	3.48775	2.58296	2.44674	1.33232	1.11416	-0.0924277	3.2655	3.47015	2.21761	3.13829	3.19743	2.51403	-0.126562	1.50233	1.5179	2.54354
ENSG00000053747	LAMA3	protein_coding	6.29971	4.91552	6.68924	3.47764	6.59095	3.60924	4.90404	6.69801	5.31062	5.86488	6.23874	4.5959	5.08833	5.53483	5.10861	4.94063	4.61676	4.25443	5.44488	4.88079	4.56733	6.20617	3.05693	5.13825	2.83196	4.36582	5.4149	6.05567	4.80822	4.92142	4.23085	6.1344	6.88469	2.75117	5.45488
ENSG00000053770	AP5M1	protein_coding	4.54825	4.46757	4.40672	5.39127	4.77644	4.90213	4.85162	4.67037	3.80683	4.76775	4.17979	4.61649	4.7234	4.9173	4.74605	4.62276	4.3083	5.3714	4.65805	4.63814	4.74294	4.53022	4.48947	4.79393	4.19332	4.95747	4.3562	4.78386	4.97664	4.70436	4.74901	4.91314	5.08632	3.98409	4.56448
ENSG00000053900	ANAPC4	protein_coding	4.85007	4.03595	3.87043	3.59988	3.9877	4.57846	4.57877	4.26318	4.63425	4.59915	4.74366	4.40789	4.27207	4.44211	4.33748	4.4394	4.50765	4.29966	4.05812	3.60415	4.36736	4.40935	3.97268	4.3983	2.97412	4.50442	4.48388	4.4768	4.46399	4.64458	4.49538	4.07116	3.83531	4.43697	4.74668
ENSG00000053918	KCNQ1	protein_coding	3.10839	4.58684	2.48261	4.71204	2.89561	3.69647	3.21362	2.56355	3.94217	4.63037	3.88977	4.02301	3.57122	4.57045	2.79358	3.23626	2.65111	2.98196	3.43698	2.63249	2.8681	3.608	3.43374	3.28751	4.61334	3.95752	3.32736	3.75224	3.42735	3.37406	3.3905	3.35168	1.83357	3.13156	2.79059
ENSG00000054116	TRAPPC3	protein_coding	5.19959	5.52172	5.44964	5.47112	4.87558	5.4376	4.96875	5.02655	6.02572	5.31179	4.99572	5.39759	5.41596	5.16567	5.00877	5.51512	5.28624	5.91411	5.46035	5.08586	5.91086	5.08614	7.02953	5.39419	5.6116	5.42806	5.12067	5.39279	5.35823	5.65271	5.21158	5.24987	5.54083	6.21296	5.5248
ENSG00000054118	THRAP3	protein_coding	6.96542	7.14843	7.20759	6.9202	7.05727	6.9885	7.13281	6.92828	6.68975	7.0149	6.68552	7.37418	7.63733	7.07786	7.02807	7.01291	6.75423	8.07401	6.98423	7.09302	7.38227	7.08183	7.53059	7.37289	7.29595	6.99581	6.87086	7.26559	7.25709	7.11142	7.0971	6.74109	7.21631	6.73364	7.23019
ENSG00000054148	PHPT1	protein_coding	4.91784	6.09008	4.66683	4.04293	4.42313	4.88984	4.80828	4.97824	6.00655	4.64267	5.04279	4.68632	4.90251	4.66428	4.82764	4.90567	5.62159	5.81789	4.66278	4.71197	5.39085	4.51746	4.73439	4.61683	5.00092	5.19662	5.0709	4.81949	5.20816	5.41369	4.87533	5.0381	5.11525	6.70138	5.35478
ENSG00000054179	ENTPD2	protein_coding	1.74553	1.30545	1.48307	0.948776	1.33821	1.41701	0.664423	0.865763	1.89887	1.36094	2.1838	0.788509	1.55147	1.03259	1.33857	1.42203	0.233496	0.0446181	-0.043635	0.543492	-0.406665	3.44e-05	2.01536	1.15427	2.54701	1.15342	1.90041	1.19496	0.681596	1.40771	-0.449098	2.73911	1.71573	2.49478	0.637916
ENSG00000054219	LY75	protein_coding	4.70032	3.38536	5.06964	5.42225	4.79412	5.45187	4.61337	5.68385	2.46128	4.93045	3.86753	3.85643	3.79259	5.29386	3.86102	2.73872	4.44773	4.32176	3.37304	5.5035	3.00675	5.81517	4.43638	3.72055	3.2697	4.96149	2.73828	4.19097	4.12626	2.94586	3.87246	4.18433	5.03992	4.04453	2.37963
ENSG00000054267	ARID4B	protein_coding	6.52666	5.46056	6.03866	5.57389	6.25909	5.94591	6.23278	6.05883	4.60735	6.05175	6.00575	6.26322	6.6772	6.48904	6.13587	6.03236	5.89273	6.92427	5.70988	6.18027	6.37213	5.75664	5.28045	6.83856	5.92412	6.01591	5.59251	6.22782	5.93668	5.61301	5.81204	5.48728	5.82046	4.34841	5.6229
ENSG00000054277	OPN3	protein_coding	3.89397	3.27948	3.10615	4.57269	4.06592	5.40344	3.23716	3.43547	3.96354	3.457	3.12529	3.26573	3.63147	4.56829	3.34001	3.4706	3.93663	3.41912	3.13526	3.62208	3.32803	4.56785	3.98169	3.29201	2.9689	3.70945	2.64768	3.59272	3.11906	3.56509	3.04624	4.74347	4.31686	4.16091	3.23212
ENSG00000054282	SDCCAG8	protein_coding	4.68873	4.46757	4.29174	3.56728	4.00882	4.71981	4.63834	4.14727	4.31899	4.70461	4.83691	4.45895	3.85569	4.51779	4.57181	4.5925	4.33819	4.47946	4.19929	3.96316	4.72965	4.40416	3.57738	3.89938	4.31136	4.50625	4.57917	4.56741	4.43122	4.27904	4.0816	4.07263	4.35375	4.46672	4.40862
ENSG00000054356	PTPRN	protein_coding	-3.41948	1.11121	-3.51803	-2.27558	0.573909	-4.08843	-3.48508	-1.92549	-0.798526	-4.08843	-2.89573	-3.4182	-2.13449	-2.31684	-1.06414	-3.02671	-3.02789	-4.08843	-2.81969	-1.58881	-2.16845	-3.18887	0.0600453	-3.061	1.89422	-2.52049	-3.67811	-2.66939	-3.0943	3.25014	-3.50511	-0.32916	-2.11511	0.286233	-2.57623
ENSG00000054392	HHAT	protein_coding	2.84848	3.0205	2.25168	2.32431	2.73025	2.66601	3.20886	2.64244	2.70915	3.21486	2.83053	2.73623	2.56467	3.07591	2.68275	2.58583	2.48012	2.08856	2.33061	2.36085	2.57308	2.32018	2.45781	2.0312	2.66137	2.45609	2.52217	2.70509	2.2398	2.55976	2.24656	2.36477	1.9181	2.52742	2.446
ENSG00000054523	KIF1B	protein_coding	6.25325	6.15534	6.14244	6.41086	6.46415	5.96946	6.43157	5.77353	5.79931	6.33808	6.00688	6.63625	6.90513	6.72942	6.27652	6.23817	5.71745	6.71565	6.21526	6.60436	6.55149	5.86514	5.98103	6.96201	6.10143	6.08872	6.01244	6.19008	6.1858	5.95378	6.21329	5.12288	6.4897	5.05741	6.20994
ENSG00000054598	FOXC1	protein_coding	6.39909	4.69701	5.92751	3.89794	4.93564	3.74911	4.4875	3.53426	5.74481	4.83004	5.05378	5.26954	6.14104	5.633	4.19239	5.66623	4.77814	4.89355	4.27121	4.74343	4.90736	3.63484	2.64528	5.38685	1.81504	5.03956	4.16415	5.02095	3.90267	5.75929	3.53239	0.463533	2.27292	2.65844	4.20648
ENSG00000054611	TBC1D22A	protein_coding	4.82558	5.29453	4.36342	4.34865	4.18823	5.03971	5.03338	4.5258	5.72773	5.06298	5.19443	4.77325	4.67968	4.85852	4.77335	4.74128	4.78817	4.70804	4.8691	4.45826	4.9821	4.51586	3.69984	4.68859	4.78195	4.79441	5.06924	4.91357	4.87711	5.08125	4.61747	4.81814	4.75402	5.10414	5.26673
ENSG00000054654	SYNE2	protein_coding	7.45385	5.88876	7.28162	6.57076	6.58119	6.39854	7.08366	6.87179	6.89902	6.98582	7.38871	7.05321	7.41065	7.34009	7.02136	7.22933	6.83145	7.55799	7.45164	7.05624	6.95699	6.83192	6.19712	7.42276	5.81933	6.47516	7.02855	7.36195	6.60976	6.51855	6.79349	6.58676	6.95739	5.61187	7.19604
ENSG00000054690	PLEKHH1	protein_coding	1.76037	1.80051	2.80445	4.39498	2.61254	1.31778	1.90769	1.59624	1.68394	1.23661	2.28422	1.90435	1.46582	1.87884	2.381	1.0951	1.02665	3.7863	2.0804	2.29979	2.16278	2.77631	3.67506	2.51993	2.05054	0.864064	2.37933	1.42386	2.69433	2.70278	2.6946	4.00338	3.23805	2.8768	2.59645
ENSG00000054793	ATP9A	protein_coding	7.22554	7.17003	6.35431	6.01069	6.52365	5.93878	6.65862	6.30999	7.24882	7.27011	6.65842	7.95948	7.58624	5.56974	6.93167	7.789	5.60371	7.95642	8.04868	6.50305	8.21526	6.0565	6.91483	7.77687	6.88862	6.72361	7.42709	7.88211	7.28	7.53969	7.65443	6.26621	6.04334	5.80061	7.08066
ENSG00000054803	CBLN4	protein_coding	3.96296	4.33753	1.83394	2.74574	3.77679	5.27989	3.72402	4.53855	3.38394	3.08867	4.95528	3.1963	3.88898	2.1793	3.28933	2.06413	4.42862	-0.0430201	2.94141	4.30468	2.21457	3.54336	1.45386	1.65138	-1.32516	5.60709	4.50123	3.88629	3.14781	2.11298	3.18281	-0.803089	0.741316	3.81594	1.48973
ENSG00000054938	CHRDL2	protein_coding	-2.96421	0.975034	-0.543865	-3.58366	-1.90644	-2.08151	-0.952799	-2.42217	-2.11507	-2.08604	-2.6478	-2.10416	-1.14232	1.76297	-1.29214	-2.19369	0.233496	-2.05199	-1.98784	1.6461	-3.32625	-2.88789	-2.2769	-1.23437	1.27063	-1.40963	-1.36756	-3.00706	-1.29115	0.0686584	-2.28459	-3.71921	-2.58804	-4.08843	-2.00376
ENSG00000054965	FAM168A	protein_coding	5.95	6.49861	6.35179	6.30251	6.15662	6.15285	5.97792	5.96396	5.92583	6.17332	6.4518	5.88889	5.41405	5.87025	6.1577	6.06648	6.37719	5.6638	6.15391	6.11531	6.03037	5.94237	6.1176	5.25469	6.63234	6.43625	6.18572	6.43564	5.8224	5.7465	5.7435	5.92116	5.86159	6.03572	6.28389
ENSG00000054967	RELT	protein_coding	3.66071	3.74073	3.71313	2.69727	3.22331	3.55425	2.26915	2.8356	3.61758	3.20384	2.81512	3.58693	5.36363	4.35474	1.91231	3.04839	3.34691	4.55229	2.50218	4.1625	3.20541	3.39426	2.73328	5.5108	4.59314	3.12931	2.13446	3.01127	2.30934	4.42832	2.1641	3.44321	2.27292	2.83178	2.92594
ENSG00000054983	GALC	protein_coding	5.51177	5.15653	5.09634	4.7495	5.31304	6.20138	5.58803	5.00834	5.3436	5.90458	5.34421	5.86929	5.49915	6.15303	5.33538	5.54999	5.01298	5.236	5.51191	5.15767	5.70334	5.90794	4.77772	5.12695	4.1293	5.9761	5.08412	5.9752	5.6455	5.3703	5.42039	4.55009	4.49253	4.41969	5.1967
ENSG00000055044	NOP58	protein_coding	6.05682	4.82136	6.23325	6.15278	5.61037	5.20551	5.20436	4.94989	5.76777	5.64302	5.22488	5.54235	7.99577	6.58226	4.99829	5.35872	5.69363	8.02503	5.19915	6.26884	6.28776	5.5132	5.22651	7.57022	6.53025	5.25669	5.14611	5.40513	5.35207	6.93148	4.79388	5.07672	6.65737	5.49915	5.74436
ENSG00000055070	SZRD1	protein_coding	7.18072	7.53857	7.20201	7.16931	6.97737	6.95617	7.08269	6.77948	7.4581	7.29305	7.12321	7.17655	7.87012	7.46355	6.83485	7.11091	7.26109	8.05732	6.96745	7.20012	7.39636	6.88877	6.68932	7.59775	8.19833	7.05527	7.0525	7.20015	7.14418	7.45297	6.71159	7.08252	7.07389	7.41594	7.42309
ENSG00000055118	KCNH2	protein_coding	0.26682	1.35018	2.89016	1.61492	1.07892	-0.118977	-0.717387	0.803747	0.632167	0.0189123	1.05268	0.427523	0.312117	1.0574	1.40356	-0.117565	1.72846	-0.0430201	-0.646607	0.659124	-0.330462	-0.753893	2.91831	-0.791786	6.29987	1.5012	0.966436	-0.860322	-0.639688	2.12432	-1.00531	3.59625	1.86798	3.22406	1.7098
ENSG00000055130	CUL1	protein_coding	6.05982	5.9427	5.98578	5.66912	5.8346	5.73753	5.6742	5.60801	6.12034	5.79862	5.9621	6.17227	7.08706	6.20876	5.85024	5.91881	5.56631	7.48742	5.94471	6.10961	6.36212	5.66341	6.00554	6.81216	5.99576	5.70936	5.9384	5.78404	5.78932	6.85568	5.7992	6.06405	5.90418	5.78635	6.4757
ENSG00000055147	FAM114A2	protein_coding	4.68095	4.25466	4.44876	4.36253	4.23678	4.67039	4.77005	4.41436	4.27266	4.58009	4.28049	4.68047	4.82436	5.12077	4.38492	4.70107	4.66474	5.02596	4.68153	4.39503	4.82645	4.29809	3.53822	4.40663	4.23737	4.78689	4.26627	4.77352	4.6861	4.60465	4.40252	3.25135	3.76403	3.61801	4.35013
ENSG00000055163	CYFIP2	protein_coding	5.25828	3.96222	4.51141	5.02843	4.2288	4.83963	4.06124	5.44235	4.11447	4.4034	4.53058	4.40553	3.651	4.63779	3.83062	3.07599	4.92327	3.70793	4.00947	4.57512	3.19255	5.18125	5.32095	4.095	5.49033	4.40764	4.41231	3.74872	4.12385	4.54683	3.93734	4.89912	5.5679	4.73297	4.61343
ENSG00000055208	TAB2	protein_coding	6.55034	6.5079	6.40809	6.14426	6.44319	6.80014	6.68967	6.45909	6.35979	6.78959	6.70132	6.64829	6.78796	6.75713	6.39551	6.48772	6.12287	7.53075	6.59993	6.25454	6.8839	6.37265	6.31812	7.27736	6.42037	6.45204	6.76351	6.68964	6.38715	6.84201	6.4689	6.345	6.79142	6.31697	6.52643
ENSG00000055211	GINM1	protein_coding	6.64736	6.09666	6.32486	5.17723	6.16135	6.1508	6.46834	5.94013	6.48237	6.48708	6.35654	6.54735	6.84774	6.74525	6.30401	6.79146	6.23774	7.04674	6.46661	6.32901	6.97915	5.86765	5.58541	6.53573	5.35593	6.41003	6.08657	6.85043	6.42876	6.61063	6.40251	4.97815	5.30692	5.38802	6.63316
ENSG00000055332	EIF2AK2	protein_coding	6.52395	6.35305	7.2294	6.91667	7.02797	6.78164	6.60716	6.64852	6.21359	6.5412	6.04206	7.2876	6.87499	7.47424	6.66668	6.52625	6.22733	7.16634	6.75848	6.47571	6.62091	6.63735	7.08703	7.22475	7.19206	6.97211	6.19184	6.83185	7.57047	6.00759	6.76035	6.72458	6.88206	5.36901	5.95592
ENSG00000055483	USP36	protein_coding	6.30098	5.83075	5.86184	4.42008	5.62032	5.0846	5.01306	4.92462	6.11318	5.92319	5.86504	6.57812	7.49325	6.98191	5.33538	5.75514	5.38429	7.58154	5.65083	6.20427	6.56714	5.66196	5.06207	7.38927	5.65204	5.90766	5.80353	5.80535	5.10195	6.79178	5.14148	5.72749	5.58157	5.67968	5.89188
ENSG00000055609	KMT2C	protein_coding	6.75781	6.25501	6.40857	6.69528	6.06604	6.4273	6.71294	6.64115	5.65734	6.85845	6.7331	6.97644	6.88121	6.93833	6.81827	6.7189	6.24079	7.25571	6.89598	6.65704	7.03468	6.54093	6.00664	6.97361	5.5579	6.86469	6.75785	7.06673	6.82796	5.92246	7.02884	6.24223	6.30428	4.59736	6.42815
ENSG00000055732	MCOLN3	protein_coding	2.06538	1.7843	0.701905	3.6769	2.17953	2.33007	3.16043	2.07012	3.46109	2.24025	2.99458	2.36003	0.939137	3.09999	2.57966	1.96131	0.933302	3.46749	2.31468	1.12912	2.39374	2.41268	3.17555	1.81047	1.86082	1.64133	1.78371	1.8354	3.00842	2.71783	3.47653	2.65914	0.964415	0.624672	2.86256
ENSG00000055813	CCDC85A	protein_coding	3.7784	3.8184	3.76548	2.77718	2.52403	1.44415	2.67289	1.85255	3.83029	3.15887	4.43299	3.49207	2.839	2.68028	2.93217	3.34463	2.51276	3.9932	4.37663	2.12979	3.61011	1.9635	-0.200335	3.22766	-0.0924277	2.30412	3.14699	3.74872	3.67135	3.41157	3.14986	-0.938744	0.0377811	-0.645846	3.14156
ENSG00000055917	PUM2	protein_coding	7.06069	6.41357	6.94461	7.01937	7.41594	7.10919	7.03311	7.03897	6.27043	7.05955	6.7575	7.06149	7.5559	7.19323	7.1223	6.98334	6.85073	7.77613	7.06263	7.17999	7.12626	6.74905	7.04412	7.54921	6.70709	7.04553	6.8613	7.19047	7.0819	6.81252	7.09308	7.13503	6.56405	6.02147	6.88087
ENSG00000055950	MRPL43	protein_coding	4.67508	5.3116	4.33721	5.47512	4.46957	4.67899	4.83166	4.62626	5.9094	4.54557	4.85586	5.06302	4.62145	4.61708	4.78193	4.97768	4.90187	5.47164	4.75568	4.57696	5.38662	4.41624	4.56036	4.68346	5.13038	4.71098	4.93523	4.85099	4.92497	5.31323	4.87533	4.72675	4.8689	5.73575	5.33351
ENSG00000055955	ITIH4	protein_coding	0.531966	1.73455	2.22554	1.30566	0.356803	1.49694	0.745456	1.40063	2.53451	0.162521	1.70423	2.12733	1.6583	2.35966	0.908042	1.27735	2.83009	2.14913	1.09099	1.55946	1.64502	1.62575	-0.160135	1.13435	-1.32516	1.78122	1.3849	1.10981	0.733112	2.4287	1.21056	-0.126562	0.795947	1.25103	2.09708
ENSG00000056050	C4orf27	protein_coding	4.0103	4.00131	3.70369	3.84701	3.6421	4.15232	4.33001	3.87559	4.43828	3.9646	3.64735	4.08046	3.58483	3.97647	3.98298	4.17417	4.19472	3.92555	3.69871	3.57868	4.36449	3.49536	4.12685	3.46147	4.89077	4.11005	3.68061	3.83083	4.29431	3.94355	4.08658	3.34682	3.16383	3.79933	4.20648
ENSG00000056097	ZFR	protein_coding	6.72461	6.33299	6.58515	6.52751	6.996	6.37581	6.61706	6.37451	5.94878	6.84875	6.47935	6.63018	7.45254	6.811	6.46946	6.52875	6.19313	7.32735	6.73324	6.57981	6.70082	6.64874	6.30022	7.39347	6.45389	6.51123	6.49749	6.90988	6.67048	6.73512	6.48172	6.27582	6.71905	5.57331	6.53705
ENSG00000056277	ZNF280C	protein_coding	2.31703	2.27665	2.94459	2.49157	2.70171	2.30067	2.72043	2.53203	1.3686	2.84073	1.85251	2.96539	3.76297	2.27758	2.4987	2.53104	2.25751	3.55962	2.24914	2.29979	2.48092	2.51254	2.29383	3.35361	2.48258	2.6344	1.90041	2.86953	2.60728	2.22256	2.2105	2.7465	1.75302	2.08749	2.04093
ENSG00000056487	PHF21B	protein_coding	-1.18364	-1.77457	-1.31881	-3.21046	-0.496798	-1.67886	-1.87596	-3.18573	-0.314127	-1.8843	-1.37214	-2.61648	-3.11898	-1.54529	-0.807244	-1.82361	-1.07816	-4.08843	-3.13262	-1.04549	-1.09558	-1.45779	0.546539	-1.04077	-4.08843	-1.93838	-0.44291	-2.39596	-1.92765	-2.12365	-3.09089	-0.803089	-3.63864	-2.1845	-1.09808
ENSG00000056558	TRAF1	protein_coding	3.81085	3.76158	3.25142	2.80286	3.26292	4.22844	2.82356	4.56993	3.03607	2.7298	3.51052	3.68767	3.94808	3.93021	2.84595	3.16608	4.41789	3.77993	3.27765	4.15267	3.61011	4.47353	3.41391	4.41697	2.91568	3.83444	3.13433	3.23383	2.78255	4.17109	3.32875	2.48893	3.41136	3.7274	3.63755
ENSG00000056586	RC3H2	protein_coding	6.38898	5.61974	6.16669	5.90379	6.31716	5.79004	6.31804	5.97572	5.66878	6.42315	5.9881	6.3227	6.39386	6.73279	6.18059	6.20105	5.65943	6.55425	6.13532	6.1989	6.03037	5.90733	5.88223	6.40622	6.27314	6.36222	5.90107	6.67489	6.4224	5.70745	6.02754	5.53873	5.02856	5.20846	6.00811
ENSG00000056661	PCGF2	protein_coding	5.08045	5.64128	5.13079	4.22112	4.8511	4.6516	4.69043	4.61727	6.46936	4.84608	5.46598	4.88269	4.72032	5.34261	4.86042	5.18075	5.02009	3.95977	4.90811	4.54537	4.46681	4.11111	5.32361	3.84833	6.75749	4.78689	5.06341	4.59313	4.40565	4.98345	4.30541	5.11291	5.10176	5.63545	4.79981
ENSG00000056736	IL17RB	protein_coding	-0.550073	-0.325186	-0.000714982	0.664932	-0.125566	-1.36441	-0.394386	-0.877286	-0.950129	-1.27834	-0.964959	-1.42807	-0.821957	-1.15499	-1.13621	-2.69275	0.193796	-1.72766	-2.15523	-0.957676	-2.16845	-0.075298	1.13643	-2.04748	0.970045	-1.02354	-0.076465	-1.63842	-1.01134	-1.59129	-2.09212	-0.360573	-0.420894	1.62733	-0.333116
ENSG00000056972	TRAF3IP2	protein_coding	4.77165	5.48959	4.39113	2.94342	4.15071	3.65932	4.94178	4.1883	5.3497	5.23398	5.38305	5.05701	5.91597	5.57726	4.26414	4.46259	4.38522	6.69379	4.17963	4.53784	5.50184	4.09402	4.0561	6.65806	3.43013	4.33725	4.84394	4.84277	4.83057	6.39817	4.48975	4.18296	4.87526	4.31374	5.14214
ENSG00000056998	GYG2	protein_coding	7.72444	8.39192	6.0185	3.84206	6.18474	3.7133	7.33152	6.96269	8.78265	7.5633	6.95176	8.99464	8.02694	5.60382	7.70995	8.08552	3.26786	9.51502	8.46848	7.02862	9.91706	5.35092	4.52381	8.44707	3.22664	7.1653	8.31136	8.25946	8.23283	9.13472	9.07454	3.39934	2.27933	4.8521	8.07671
ENSG00000057019	DCBLD2	protein_coding	6.85695	7.28465	6.19784	6.79782	6.2669	5.79598	6.97794	6.61881	5.52345	7.06222	6.55669	6.26453	6.84844	6.35225	6.96649	6.82276	5.53189	6.52788	6.09567	6.45486	6.55526	6.22787	6.50511	6.79996	6.54083	6.66939	6.21193	6.65013	6.4692	5.53655	6.25428	6.47331	6.71963	5.65866	5.70726
ENSG00000057252	SOAT1	protein_coding	6.03486	5.49831	5.7509	5.9568	6.03034	7.73616	5.92091	5.64458	5.36383	6.13102	4.98083	6.1206	7.32558	6.42554	5.82496	5.8397	6.02728	7.58474	5.87174	6.25627	6.1582	6.84347	5.62621	6.85767	5.9099	6.68769	5.18113	5.93632	5.81196	6.2947	5.40651	4.76728	4.74479	4.62213	5.62926
ENSG00000057294	PKP2	protein_coding	5.36896	4.94134	5.58088	6.74911	5.89193	3.57895	5.92599	4.63667	2.83043	6.61329	5.26419	3.59526	5.16053	5.52709	5.08305	3.04839	3.46418	5.56352	2.01289	4.64867	2.1759	6.40462	6.20628	4.75369	4.91267	3.98672	4.81053	4.68981	4.78705	4.06033	5.16405	4.46865	5.96852	4.88553	5.11066
ENSG00000057608	GDI2	protein_coding	7.7395	7.65094	7.45336	7.95849	7.66558	7.94859	7.73875	7.44978	7.79965	7.79335	7.62561	7.55332	8.2719	7.88484	7.49512	7.71412	7.71076	8.68105	7.62009	7.57293	7.94304	7.67998	8.78587	8.07066	7.99203	7.83288	7.6383	7.75949	7.76786	8.20256	7.55748	7.50137	8.54655	8.1478	8.06649
ENSG00000057657	PRDM1	protein_coding	6.55567	6.11216	4.58865	4.11645	5.25431	4.79289	4.33874	5.08095	5.52165	6.12665	6.49395	4.63477	5.31751	5.84998	4.38813	4.28002	5.68202	6.60288	5.13028	5.45232	4.42894	5.68497	4.48155	5.51851	4.04009	5.26646	4.15947	5.26324	4.83205	5.27558	5.12219	3.84888	3.81782	3.82253	3.60241
ENSG00000057663	ATG5	protein_coding	5.15254	4.74804	4.97081	4.67218	4.7362	5.11869	5.13462	4.92097	5.11202	5.19553	4.91368	4.94099	5.36561	5.04372	4.86619	5.097	4.92479	5.71813	5.05437	4.71531	5.37387	4.79238	4.53762	5.18741	5.04124	5.0979	4.90575	4.95383	5.0381	5.19182	4.94695	4.59274	5.16453	5.0602	4.80263
ENSG00000057704	TMCC3	protein_coding	3.84954	5.01611	5.00707	3.96772	4.87814	4.22062	5.41305	4.56993	5.41321	4.98138	6.04481	4.33273	5.18754	5.88764	4.95124	4.38306	4.51774	4.6073	6.03498	5.44931	4.08731	5.02546	4.24757	5.68352	2.05054	5.35463	6.19375	5.60699	5.91035	5.20123	5.8782	6.45988	6.04428	3.94838	4.39001
ENSG00000057757	PITHD1	protein_coding	5.59899	5.06221	5.78486	5.13235	4.98384	6.2464	5.01443	5.01975	6.12034	5.22991	5.06793	5.28248	5.82716	5.44015	5.054	5.45962	5.44367	6.16082	5.37171	5.15644	5.80397	4.97384	4.55433	5.71572	6.31947	5.21356	5.11021	5.25211	5.14894	5.77736	4.9633	4.4831	5.25668	5.83116	5.49724
ENSG00000057935	MTA3	protein_coding	4.83437	5.07059	4.63738	5.14043	5.03507	4.40285	5.0117	4.76155	5.05343	4.89318	5.18746	4.79869	4.24233	4.3064	4.77581	4.90721	4.55542	4.61089	4.8691	4.33977	5.15939	4.31109	5.31116	4.4991	5.64796	4.72049	5.02879	4.97805	4.78248	4.58837	4.96871	5.53233	5.50438	5.01919	5.10268
ENSG00000058056	USP13	protein_coding	5.44673	4.85473	5.00451	3.36492	4.60056	3.6182	5.51479	4.56215	5.25321	5.54593	5.66751	5.36389	5.47561	5.52709	5.4997	5.02943	4.02695	5.85624	5.27829	4.65042	5.46088	4.01903	4.72905	5.21019	4.5999	4.83438	5.10292	5.4717	5.73508	5.32187	5.58702	4.14292	3.85689	2.87046	5.3374
ENSG00000058063	ATP11B	protein_coding	6.78347	5.80989	6.39446	5.71381	6.80329	6.32379	6.43514	6.33349	5.64086	6.68294	6.08177	6.6642	7.09837	6.61501	6.47287	6.24183	6.10224	7.71858	6.34199	6.40862	6.87135	6.4632	5.45074	7.30016	5.71415	6.67877	6.10209	7.15604	6.55758	6.49089	6.59009	5.45211	5.03897	4.7136	6.21471
ENSG00000058085	LAMC2	protein_coding	2.24498	2.39878	4.53998	5.46711	6.27855	-0.0416401	1.63742	3.75515	4.14752	2.01905	2.19178	2.08067	2.75724	1.93347	1.68025	2.23057	3.00659	5.18388	3.14431	5.48305	3.4944	4.82641	6.03126	4.61324	6.99797	2.57272	2.91514	1.75356	2.16675	5.21057	3.09651	7.28514	7.07043	5.95704	2.70885
ENSG00000058091	CDK14	protein_coding	5.93209	5.71474	5.14945	4.43494	5.89004	5.86413	5.8448	5.6512	4.56952	6.01831	5.78753	5.17414	5.3968	5.56109	5.71148	5.15121	5.90507	5.07361	4.81633	5.53696	4.70723	5.89751	5.58615	5.44461	5.17749	5.87538	5.60115	5.65004	5.62774	5.16599	5.51121	5.56143	3.72232	5.10819	5.55769
ENSG00000058262	SEC61A1	protein_coding	7.71685	8.47962	7.57071	7.74475	8.12436	7.76554	8.05349	7.62661	7.74478	7.87556	7.71101	7.5418	8.7319	8.6726	7.76338	7.5839	7.86939	8.73433	7.72589	7.85931	7.758	7.42413	7.74968	8.36905	8.73114	8.01041	7.64835	7.58069	8.2705	8.17009	7.2664	8.84558	8.36339	8.43383	8.0059
ENSG00000058272	PPP1R12A	protein_coding	7.03688	6.14586	7.27579	6.33808	6.84074	6.73433	6.71126	6.57114	5.51261	6.65437	6.45304	6.76124	7.13351	6.89297	6.78481	6.85856	6.86935	6.89362	6.37741	6.87303	6.54834	6.35392	6.09442	6.77686	6.45716	6.85644	6.44049	6.66886	6.48243	6.43393	6.38391	5.40502	5.43508	5.03772	6.30639
ENSG00000058335	RASGRF1	protein_coding	-0.788485	-2.51018	-0.428674	-1.22381	-1.90644	0.971133	-0.0832156	-0.148471	-0.661349	-3.40916	0.191773	-1.56974	-1.33384	-1.40313	-1.29214	-2.19369	0.833494	-4.08843	-2.15523	0.00201013	-1.5345	-0.375059	-0.926733	-0.337757	-2.12693	-0.941243	-1.60152	-1.79383	-1.51326	-1.09412	-1.92233	-0.564931	-2.2562	-0.105807	-1.59501
ENSG00000058404	CAMK2B	protein_coding	-4.08843	-1.98071	1.15399	-1.14314	-1.24221	0.231907	-4.08843	-2.23696	-1.53309	-1.54974	-1.57377	-2.61648	-1.14232	-3.40714	-2.332	-2.69275	0.0676873	-1.46303	-2.34462	-3.06374	-1.71651	-0.238901	0.89069	-1.45804	0.768639	0.244776	-2.3647	-3.44871	-2.77355	-2.35602	-1.28529	0.997197	-0.910756	0.465354	-0.79578
ENSG00000058453	CROCC	protein_coding	4.4759	5.27436	4.23609	3.47125	4.37514	4.15232	4.3035	3.98676	4.56952	4.11344	5.02392	4.51924	4.0692	4.21289	4.25888	4.85718	5.08257	3.94276	4.153	4.15759	4.21359	4.10472	4.34332	3.96852	4.38174	4.14108	4.43957	4.38692	3.94151	3.88475	4.06402	3.77491	4.45624	4.99022	4.16548
ENSG00000058600	POLR3E	protein_coding	4.67704	4.77905	4.64727	3.95403	4.55502	4.01878	4.27649	4.15764	4.63092	4.5521	4.68552	4.48829	5.56586	4.9996	4.41044	4.36974	4.17192	5.85321	4.73038	4.5788	4.89153	4.09831	4.58126	5.69292	4.92079	4.18983	4.80555	4.37328	4.68937	5.47919	4.47272	4.79872	4.81481	4.83264	5.27993
ENSG00000058668	ATP2B4	protein_coding	8.39016	8.65853	7.87816	7.754	7.70187	7.6608	8.35982	7.77641	8.43772	8.39191	8.45024	9.01436	9.06399	8.44242	8.39376	8.62608	7.60477	8.8074	8.37664	8.07655	8.79987	7.27856	7.33746	8.89072	7.98639	8.48367	8.5765	8.33951	8.58105	8.45567	8.44702	8.04542	8.17528	6.63413	8.43379
ENSG00000058673	ZC3H11A	protein_coding	8.01892	7.35184	7.63543	7.20659	7.63156	7.34435	7.76834	7.70062	7.52835	7.90181	7.51271	7.72788	8.11252	8.08887	7.90813	7.85382	7.4648	8.43365	7.77384	7.5917	8.0251	7.45813	7.42079	8.18764	6.59601	7.89632	7.43259	8.06976	7.88761	7.61949	7.87676	7.31045	7.66171	6.83164	7.39466
ENSG00000058729	RIOK2	protein_coding	4.29659	3.69378	4.39504	4.15884	4.01348	4.40975	4.21379	4.11996	4.17068	4.10457	4.0187	4.61239	5.62138	4.69819	4.2305	4.41367	4.2147	5.52214	4.00947	4.33326	4.96519	4.18157	3.45655	5.41085	3.53268	4.45779	4.45109	4.21665	4.32401	5.09716	4.18512	3.40168	3.82221	4.2854	4.59567
ENSG00000058799	YIPF1	protein_coding	3.48865	4.15733	3.35151	4.12259	3.50016	4.08278	4.02924	3.80084	4.43446	3.93156	3.76163	4.02916	3.63147	4.16804	3.70477	4.07369	3.83706	5.3064	4.05093	3.79322	4.65664	3.63188	3.79749	4.095	4.53961	3.94134	3.98368	3.68759	4.30285	4.7119	3.7553	4.48641	4.53464	4.87922	4.46839
ENSG00000058804	NDC1	protein_coding	4.36859	4.13514	4.82464	6.23714	4.71207	4.31736	4.54333	4.29546	4.01562	4.62004	4.1818	4.12712	5.41786	4.69622	4.44326	4.4223	4.33363	5.29527	4.32787	4.46622	4.39006	4.55542	4.90633	4.92	6.16382	4.39779	4.08416	4.43584	4.76711	4.59653	4.22634	5.6007	5.86426	4.28778	4.41232
ENSG00000058866	DGKG	protein_coding	2.28659	0.792597	3.45264	4.49919	2.3945	1.67931	1.75949	1.14122	0.337014	1.2148	2.39203	2.27969	2.61858	1.82207	2.69837	2.14975	2.8236	1.93648	1.61788	2.1497	0.926021	1.1677	-0.0829471	1.11416	1.43096	2.0462	2.79566	1.66679	1.04989	3.10314	0.884089	-0.986953	0.0676929	0.847825	3.73221
ENSG00000059122	FLYWCH1	protein_coding	5.18316	5.63903	4.77443	3.56428	4.78054	4.69743	4.71411	4.65728	5.53241	4.98943	5.47337	4.90629	5.29906	4.77499	4.95991	5.2814	5.14895	5.12729	4.84712	4.68323	5.26141	4.4981	4.2513	4.01828	4.37584	5.12441	5.05505	4.7787	4.50717	5.50762	5.16169	4.13309	3.67938	4.75553	5.46381
ENSG00000059145	UNKL	protein_coding	4.00096	4.52722	3.44133	2.87243	3.52318	3.93994	4.56582	4.50808	4.11447	4.16836	4.12043	4.0414	3.61166	3.24741	4.62456	4.62463	4.00704	4.97667	4.77909	3.25944	4.54728	3.36607	3.93142	3.70713	3.19572	4.10037	4.31474	4.42045	4.50902	3.55675	4.49351	3.49019	3.44594	3.31567	4.7201
ENSG00000059377	TBXAS1	protein_coding	4.2605	4.97207	3.65228	4.16082	4.50469	6.06653	4.06651	3.59043	4.3679	5.59107	4.59366	4.65083	5.05938	5.05762	3.6469	3.98911	4.4811	4.24057	4.17302	4.05312	4.22626	5.85566	3.59511	4.9644	4.31548	5.34441	3.70649	5.26201	4.09706	4.48879	3.85796	3.51636	2.24046	4.7242	4.11877
ENSG00000059378	PARP12	protein_coding	4.52236	5.16751	5.1448	5.31746	4.31611	5.35778	4.55649	4.67759	5.1775	4.45546	4.39376	4.90963	4.75984	5.40192	4.05149	4.3059	4.86127	5.5164	4.61642	4.59885	4.02341	4.92756	4.27532	4.88615	5.96334	4.8019	4.28643	4.18057	5.43704	4.46446	4.47272	4.91642	6.19883	4.72771	4.35972
ENSG00000059573	ALDH18A1	protein_coding	5.09516	6.10566	5.23929	6.85018	5.76802	5.33168	5.3279	5.55173	5.19115	5.09018	5.07118	5.12037	6.19416	5.7278	5.20564	5.40081	5.57985	5.90389	5.18826	5.53885	5.05849	5.15265	6.10373	5.79161	6.63441	6.0875	5.2399	5.0195	5.55356	5.55238	4.86231	6.83919	6.0736	6.63927	5.68605
ENSG00000059588	TARBP1	protein_coding	4.63939	4.21289	4.51501	5.04143	4.41787	4.14407	3.92583	4.36332	5.05592	4.21579	4.53686	4.54954	4.64113	4.36471	4.41832	4.49567	4.43076	4.42743	4.43306	4.20117	4.47745	4.78441	4.55282	4.4087	4.42999	4.56198	4.28499	4.44239	4.5473	4.34353	4.52137	5.46729	6.1411	4.42619	4.21496
ENSG00000059691	PET112	protein_coding	4.54611	4.33475	2.99705	2.9799	2.99304	3.47752	3.87871	3.35487	4.4152	3.90797	4.10149	4.27433	4.02995	3.23115	3.87941	4.0292	3.01231	4.58555	3.92804	3.09975	4.49849	3.15979	3.51358	3.72055	4.09619	3.70306	4.11829	4.14088	4.30072	4.56775	4.24206	3.29232	3.65249	3.98996	4.87268
ENSG00000059728	MXD1	protein_coding	5.20638	4.42899	4.85195	3.32649	5.2883	4.09568	4.00476	3.90543	3.98982	4.83183	3.8725	6.07966	6.58626	7.07862	4.20339	5.07938	3.64802	5.8456	4.1213	4.90149	5.30983	4.57402	4.33806	7.22269	3.73367	5.87467	3.93161	6.4487	4.74846	4.98345	4.69945	4.17751	3.40844	3.56397	3.76436
ENSG00000059758	CDK17	protein_coding	6.31236	4.12552	6.48723	5.01201	6.21736	5.40516	5.21744	5.27627	5.22251	5.20938	5.02616	5.69051	7.7229	7.33788	5.1965	5.23072	5.73052	7.23082	5.51453	6.68161	5.94671	5.44322	4.91928	7.32701	4.12461	5.4961	4.69356	5.52509	5.26615	6.54516	4.8925	4.12602	4.01493	3.44942	4.90318
ENSG00000059769	DNAJC25	protein_coding	5.31719	4.37048	5.04619	4.20772	4.72773	5.02967	5.0978	4.26701	5.33952	5.39049	4.66274	5.09272	5.8888	5.52597	4.74354	5.34518	4.68993	6.48153	4.77473	4.81218	5.81345	5.0016	4.56036	5.81526	4.42238	4.95882	4.5473	5.24214	5.28677	5.2079	4.99412	3.82639	3.77992	3.73091	5.13545
ENSG00000059804	SLC2A3	protein_coding	10.1395	7.2904	9.26879	6.1357	8.2333	5.51483	6.57795	5.28481	8.66099	8.16553	8.12017	8.80371	9.142	9.40087	6.5427	8.00111	5.966	8.70205	6.92513	7.14043	8.36422	6.18362	5.54342	8.44581	5.04497	8.08303	5.8565	8.49739	6.96792	7.83216	5.14507	5.213	4.28539	7.15154	5.66686
ENSG00000059915	PSD	protein_coding	1.84636	4.18538	1.45334	2.11883	2.17953	2.72253	2.19415	2.98745	0.735168	1.63169	1.53894	-0.220487	1.73353	1.46221	2.32842	1.87595	3.17407	-0.722881	-0.585541	2.25454	0.316567	1.97288	3.06966	-0.717503	2.51873	3.03081	1.8702	1.40611	1.51476	0.0209175	0.634759	3.17673	2.14549	4.17128	0.711715
ENSG00000060069	CTDP1	protein_coding	4.26571	4.68396	3.96827	3.30148	4.07039	4.08925	3.78598	3.81663	4.19347	4.27757	4.24642	4.21885	5.33976	5.03282	3.78988	3.89306	4.19472	5.31082	3.98199	4.515	4.2008	4.22735	4.19624	5.14946	4.38957	4.0358	4.21911	3.92107	4.10442	4.90343	3.6649	4.44953	4.40004	3.90557	4.56448
ENSG00000060138	YBX3	protein_coding	8.78856	8.0736	8.73926	6.62647	7.90954	6.56038	7.83079	6.42945	9.12209	8.43381	8.49988	8.16634	9.82701	8.93258	7.20665	8.06587	7.25958	10.1552	7.84245	8.12512	8.74548	7.21649	6.47112	9.59578	7.5077	7.3655	7.50242	8.40743	7.80124	9.52658	7.2328	6.95575	8.2709	7.05165	8.45397
ENSG00000060140	STYK1	protein_coding	-1.43096	-1.1586	0.541625	1.15428	-0.855422	0.351408	-1.13421	-0.0689634	-2.52712	-1.70734	-0.895696	-1.42807	-1.14232	-0.674678	-2.17194	-1.66898	-0.223361	-0.875415	-0.920557	-1.13901	-3.32625	0.412218	-2.2769	-0.717503	2.29523	-0.652257	-1.88091	-1.63842	-0.639688	-0.366523	-1.50756	0.600337	1.61803	-0.645846	-3.14266
ENSG00000060237	WNK1	protein_coding	8.85208	7.96454	8.53478	7.95778	8.34617	7.7039	7.90964	7.47238	7.82469	8.61042	8.15769	8.51741	9.1556	8.44668	8.07352	8.48031	7.2138	9.42883	8.84669	8.02409	8.60139	7.9918	7.80974	8.96546	6.74915	8.13908	8.3404	9.27522	8.31026	8.34749	8.22774	7.55851	7.33251	6.44047	8.54701
ENSG00000060339	CCAR1	protein_coding	6.04475	5.72539	5.8122	6.18634	5.75489	5.61152	5.4954	5.52636	4.87883	5.884	5.32076	5.41885	6.12832	6.37031	5.57427	5.79721	5.68381	6.32624	5.61713	5.99735	6.08357	5.27712	5.36553	6.0861	7.42678	5.80038	5.13185	5.80027	5.87996	5.3857	5.45355	5.5525	5.95907	4.71005	5.30697
ENSG00000060491	OGFR	protein_coding	5.18041	5.97697	4.96556	4.39329	4.89588	5.35956	5.07185	5.0601	5.70253	5.16742	5.43018	5.45245	5.62961	5.56218	4.97496	4.91181	5.44684	6.6595	4.84435	5.2688	4.89551	5.03557	5.50956	6.06915	6.36634	4.81083	5.26986	4.79072	5.10806	5.96408	4.93457	5.61389	5.4536	6.23783	6.0075
ENSG00000060558	GNA15	protein_coding	3.41552	4.1126	2.46782	1.88877	2.61866	3.51319	2.55794	2.39152	3.3997	3.63174	2.64541	3.84251	3.79844	4.78616	2.2026	3.41548	2.07288	3.57442	3.12617	3.39489	3.67625	2.73831	1.73536	3.52405	3.48962	3.23042	2.24453	2.58403	2.84242	3.92097	2.34134	3.08351	1.63811	3.22903	2.86256
ENSG00000060642	PIGV	protein_coding	3.42486	4.44969	2.9658	3.8371	3.1743	3.58201	3.8697	3.54693	4.11447	3.66025	3.60615	3.25526	2.96922	2.90875	3.52369	3.60172	3.64802	4.36496	3.45162	3.36539	4.22941	3.29306	3.21811	3.44135	3.09397	3.32491	3.60696	3.60444	3.73275	4.12102	3.83149	3.08351	3.96614	4.2245	3.77587
ENSG00000060656	PTPRU	protein_coding	3.39664	4.43419	5.07209	4.61244	5.35213	4.08925	3.95452	3.5843	4.60395	3.74257	4.21349	3.76717	4.26363	3.58685	4.30213	3.97452	4.76465	3.7012	4.38238	5.13538	4.25127	3.99161	4.998	3.86353	7.07616	4.18296	4.43699	3.60054	3.77637	3.85443	3.93458	6.32817	5.0276	5.64757	4.10057
ENSG00000060688	SNRNP40	protein_coding	3.95007	4.43159	4.58008	4.8807	4.43184	4.56307	4.17287	4.30108	4.66393	4.17966	4.02094	4.40079	5.51878	4.80459	4.15891	4.38085	4.46034	5.84713	4.26915	4.54725	4.71624	4.2526	4.7129	4.88615	6.0474	4.28692	4.348	3.96416	4.61408	5.20524	4.26202	4.35116	5.09905	5.15463	5.02157
ENSG00000060709	RIMBP2	protein_coding	1.86021	3.16521	1.19049	0.596096	2.22034	1.77861	2.71374	2.52564	1.7592	2.91699	2.59215	0.978644	1.13684	2.43732	2.19527	1.45604	1.79631	-0.459051	1.03375	1.66005	0.576147	1.80448	1.85788	1.32216	2.20937	2.37007	2.64323	1.8486	2.39179	0.901507	1.83747	1.37639	-0.156015	2.1412	1.14368
ENSG00000060718	COL11A1	protein_coding	0.0423137	1.71758	1.76301	3.96545	7.69592	6.43746	1.71994	4.85242	1.30305	0.116222	0.530576	-0.475468	-0.973262	1.48067	-0.35622	0.274285	7.16907	1.20663	2.6364	5.68585	1.98034	5.16498	6.97219	-0.394505	7.31612	5.16097	-0.44291	-0.0824294	0.326621	-0.808865	-1.77044	8.19488	3.76174	7.95901	1.10769
ENSG00000060749	QSER1	protein_coding	5.51177	5.04531	4.98776	6.41003	5.66091	5.56746	5.81304	5.63274	4.02582	5.4937	5.43523	5.23133	5.92803	5.60698	5.81961	5.48661	5.11879	5.59471	5.48102	5.03993	5.33052	5.16293	5.87258	5.55362	5.79522	5.66817	5.21232	5.66969	5.55177	4.93436	5.58965	5.67762	5.09361	4.2245	5.16421
ENSG00000060762	MPC1	protein_coding	4.87586	4.87209	4.47858	3.75265	4.4474	5.02518	5.25597	4.74514	4.72465	4.80471	4.45636	5.33685	4.91063	4.71193	4.95342	4.96888	4.84534	6.18392	4.75568	4.8897	5.85688	4.75481	3.59217	4.88317	3.30738	4.99192	4.7753	4.89619	5.43607	5.38098	5.23758	3.05105	4.37185	4.33695	5.62767
ENSG00000060971	ACAA1	protein_coding	5.28676	6.02346	4.8899	5.06072	4.80489	5.16937	5.5119	5.12494	5.83743	5.38073	5.00707	5.96472	5.44795	5.29386	5.1678	5.67438	5.15025	6.29643	5.63167	5.25738	6.16233	4.90323	5.02658	5.58147	4.71654	5.33515	5.43374	5.71093	5.59853	6.06094	5.66655	4.55325	5.60662	5.96451	6.40145
ENSG00000060982	BCAT1	protein_coding	5.7609	5.62658	7.71197	7.11883	7.95151	7.26927	6.58943	5.51672	4.07082	6.69136	4.24642	5.66899	5.39294	7.74103	5.52255	5.11707	6.01309	5.08141	5.6713	5.85227	4.67985	6.7194	9.45641	5.42936	7.84816	6.53074	4.57917	5.96008	6.48993	4.78338	5.20013	6.60314	4.26132	6.29167	5.07731
ENSG00000061273	HDAC7	protein_coding	6.33423	7.53736	6.70943	7.14417	6.99777	6.35228	6.74203	6.35887	7.06084	6.51801	7.09876	6.49104	6.81347	6.62126	6.49839	6.85019	6.79294	6.29866	6.75812	6.64219	6.35709	6.07404	6.8606	6.43195	7.15951	6.62787	6.67699	6.55821	6.49554	6.58828	6.36609	7.12407	7.39136	7.08355	7.06637
ENSG00000061337	LZTS1	protein_coding	2.50503	4.17298	2.62275	2.28111	2.96929	3.3613	2.96562	2.86627	3.29401	2.65889	2.90035	3.01587	4.26786	3.71321	3.28933	2.87696	4.11726	3.41912	3.25696	4.05839	1.93474	2.0458	3.67506	2.86633	3.19572	3.36992	2.41115	1.59027	3.25743	2.74012	2.05647	3.4249	2.24046	3.42364	2.25352
ENSG00000061455	PRDM6	protein_coding	2.84152	2.92023	1.60975	1.10558	2.20415	2.11048	2.54291	2.34147	1.70947	1.8874	2.52427	1.90435	0.659427	1.26333	2.84127	2.9384	1.84837	0.481449	1.71817	1.40237	0.986856	1.08361	1.61311	-0.083337	0.447148	2.13423	1.71739	1.01932	1.69444	1.85159	1.41456	1.69177	0.813707	1.72905	2.26174
ENSG00000061656	SPAG4	protein_coding	2.13538	1.13697	1.01845	3.61445	2.02224	1.16303	0.248699	1.89282	1.23438	0.412871	0.980829	1.07701	2.35831	1.9861	0.472085	0.155115	2.65842	2.06779	0.0362503	2.59668	0.862507	0.593404	0.707284	1.45658	1.86082	1.5589	0.395962	0.555143	0.454899	2.3632	-0.186129	1.18297	1.02665	2.83178	0.505852
ENSG00000061676	NCKAP1	protein_coding	7.68682	7.13251	7.90294	7.63983	7.69048	6.88584	7.70812	6.94783	7.28747	7.81162	7.42871	7.72859	8.36208	7.83414	7.60386	7.71894	7.1745	8.34473	7.80303	7.70683	7.87954	6.81246	7.49307	8.19307	7.50071	7.59527	7.42157	7.85722	7.72338	7.84078	7.55254	7.15252	8.08585	6.20794	7.6359
ENSG00000061794	MRPS35	protein_coding	5.0834	4.8114	6.01214	5.8726	5.23851	4.96906	5.37004	4.71457	4.9421	5.13296	4.72728	4.92787	6.471	5.321	5.12508	5.03084	4.73038	6.53073	4.95895	5.36773	5.4447	5.00617	5.69631	5.97008	6.57685	4.96149	4.82832	5.01072	5.40067	5.68657	5.16287	5.17036	6.37402	5.34404	5.64112
ENSG00000061918	GUCY1B3	protein_coding	4.10055	5.05548	4.45064	4.74022	4.87175	5.20055	4.48946	4.82667	5.30854	4.15411	4.75582	4.81838	3.98447	4.79356	5.17247	4.9615	5.31543	3.60358	4.60009	4.71029	4.16176	3.88386	4.33455	3.08965	6.07982	5.34748	4.38986	4.30788	4.45826	4.49754	4.44	3.45904	5.48719	3.64056	4.37495
ENSG00000061936	SFSWAP	protein_coding	4.99987	5.30167	5.19394	4.01683	4.89462	4.78096	4.675	4.45191	5.09517	4.98138	5.22488	4.65879	5.72179	4.85145	4.85926	4.70991	5.1254	6.06844	4.94479	4.87482	4.73631	4.9715	4.79059	5.87725	4.17305	4.63254	4.99069	4.76484	4.57932	5.57011	5.03852	4.42095	5.76448	5.19962	5.51967
ENSG00000061938	TNK2	protein_coding	5.45016	5.9427	4.53644	4.14082	5.09006	5.00368	4.4109	5.01861	5.44774	4.95203	5.00707	4.91629	4.98692	4.67233	4.76966	5.1782	5.38098	5.15463	4.93571	4.41367	4.9821	4.71903	5.4096	4.6024	4.87969	4.9893	4.50492	5.00483	4.691	5.00047	5.15696	4.88663	4.54796	5.32791	5.28296
ENSG00000061987	MON2	protein_coding	6.31047	5.67793	5.69959	5.26853	6.07997	5.74437	5.9821	5.73112	5.16602	6.36803	5.97198	6.166	6.64508	6.39728	6.09809	6.13697	5.7563	7.00022	5.99992	6.08526	6.20296	5.70902	5.14061	6.65325	4.29269	6.19034	5.91778	6.37535	6.15307	5.867	6.0545	4.79961	5.05959	4.42186	5.88923
ENSG00000062038	CDH3	protein_coding	3.554	3.95861	3.77452	4.60953	5.47189	1.52263	6.55144	3.01051	4.60054	4.76588	4.30644	3.48313	1.4361	5.3995	4.52877	2.40612	3.33327	2.77971	1.12792	3.08431	2.03897	3.40816	5.4377	3.77625	4.96993	1.78122	4.89172	2.28713	4.835	5.31817	3.47653	5.47732	5.148	5.67787	5.10382
ENSG00000062194	GPBP1	protein_coding	6.93426	6.07017	6.31197	5.78834	6.50767	6.39158	6.3356	6.41483	5.9988	6.57101	6.50479	6.63675	7.25072	6.88433	6.4442	6.52575	6.49161	7.44979	6.14041	6.70534	6.90228	6.32263	6.05494	7.204	6.13151	6.53613	6.39182	6.60515	6.39317	6.86374	6.25372	6.31238	6.18738	6.25072	6.45122
ENSG00000062282	DGAT2	protein_coding	7.90915	9.33737	5.56967	4.19226	5.11841	5.59874	6.17788	6.83512	8.73393	7.47232	7.07631	9.17819	8.43315	5.80582	8.52651	7.38337	2.35072	10.1091	7.89177	6.81109	9.96899	5.56218	3.90324	8.09695	3.4639	8.34438	9.40734	8.0864	9.4115	9.2045	8.61531	3.04207	2.93144	5.21724	8.73406
ENSG00000062370	ZNF112	protein_coding	0.136348	1.21159	1.19049	1.66059	1.84567	2.10199	2.23213	2.03456	1.19877	1.25809	1.83223	1.46994	1.0215	1.3662	1.87614	1.47275	2.10534	1.12856	1.28333	1.83008	0.894613	1.64934	2.35753	1.53464	2.36837	1.47147	2.25041	1.42386	1.35951	1.53212	1.73963	1.44158	2.89437	1.36377	2.17742
ENSG00000062485	CS	protein_coding	7.64068	8.2205	6.89399	7.15841	7.12895	6.68292	8.30449	7.65543	8.22274	7.35355	7.2656	8.23503	8.13524	7.22642	8.05972	7.45108	6.3644	9.39432	7.66947	7.57454	8.67111	6.91273	7.10904	8.19967	7.31945	7.53433	8.16418	7.81182	8.5303	9.00529	8.56709	7.40629	7.6821	7.15806	9.08084
ENSG00000062524	LTK	protein_coding	-0.00710671	-0.0104575	-0.957661	1.03798	0.065742	0.588801	-0.0832156	0.524996	0.684587	0.293119	0.530576	0.667435	0.607042	0.418009	-0.539535	-1.40202	2.41255	0.417224	-0.777089	0.841547	-0.123385	-0.635138	-0.121025	0.578443	0.744421	0.974187	-0.047342	-0.298222	-0.851023	0.326031	-0.700561	-0.679101	-0.694489	-0.156749	-0.333116
ENSG00000062582	MRPS24	protein_coding	4.60897	5.08058	4.00203	4.91407	4.12515	4.21077	4.675	4.33253	5.39563	4.43675	4.48423	4.69021	4.7387	4.55746	4.40569	4.93762	4.65746	5.79121	4.46589	4.28457	5.7325	4.21555	4.16295	4.9488	4.40317	4.306	4.47136	4.68614	4.75937	5.31075	4.48409	4.73235	5.11346	5.86347	5.30697
ENSG00000062598	ELMO2	protein_coding	4.18274	5.3396	4.92552	4.64972	4.88069	5.36579	4.74071	4.97003	5.00271	4.46242	5.30613	4.89285	4.62145	4.72747	4.65022	4.67604	4.76804	5.41727	4.95767	4.69683	4.69816	4.61354	6.04369	4.93303	5.10088	4.91944	5.06341	4.4489	5.00312	5.19855	4.60537	5.56405	5.23047	5.19709	5.16531
ENSG00000062650	WAPAL	protein_coding	6.34657	5.58156	6.0951	6.55724	6.34925	6.14925	5.97372	5.78962	5.2726	6.39797	5.86566	6.25864	7.38997	6.8014	5.87737	5.92186	5.62346	7.47613	5.93367	6.35013	6.2603	6.0482	5.74608	7.18959	5.99768	6.02106	5.98054	6.24602	5.90123	6.42708	5.78394	5.89687	5.86212	5.05041	6.1202
ENSG00000062716	VMP1	protein_coding	6.92852	6.91899	7.59197	5.91973	7.63797	6.67722	6.37114	6.13478	7.99813	6.98058	6.53058	6.70419	7.4197	7.49226	6.38469	6.74965	6.77119	7.77373	6.52186	7.60167	7.32783	7.20609	6.5996	8.58864	7.36409	7.24847	6.37846	7.37655	6.82351	7.53969	6.80261	7.10551	7.21485	8.332	7.1506
ENSG00000062725	APPBP2	protein_coding	6.41677	5.48959	5.80927	5.49574	6.37614	6.0334	6.22692	5.99551	5.73396	6.43969	6.15246	6.38343	6.78649	6.16592	6.3163	6.33045	5.79909	7.46625	6.31221	6.09492	6.52738	5.90059	5.36035	6.61513	5.40985	6.36829	6.20173	7.29542	6.48384	6.34646	6.46603	5.65276	5.36529	5.07131	6.12358
ENSG00000062822	POLD1	protein_coding	3.20379	4.51254	3.46013	4.03645	3.27846	3.55736	3.17513	3.28093	3.51998	3.41459	3.55759	3.11759	2.839	3.5348	2.99678	3.08145	3.55316	3.38595	3.04159	2.85495	3.13324	3.56833	5.05994	2.87236	5.72579	3.31238	3.26197	3.24885	3.1945	2.99611	3.06656	5.343	5.3194	3.92713	3.47752
ENSG00000063046	EIF4B	protein_coding	9.94791	9.18732	9.02393	9.3935	9.25769	9.4097	9.92866	9.40382	9.03645	9.86619	9.5834	9.27882	9.35898	9.20004	9.56813	9.63493	9.34478	9.72254	9.28935	9.29495	9.63931	9.15795	9.05482	9.66759	9.07728	9.38413	9.32603	9.64426	9.15025	9.21821	9.44962	8.98083	9.20494	9.29124	9.67935
ENSG00000063127	SLC6A16	protein_coding	1.16574	0.946185	0.998007	-0.516601	-0.125566	0.727811	1.25007	0.333449	2.78314	0.868854	1.86254	1.3373	0.552684	0.492666	0.447642	1.21912	1.72846	1.71396	0.953726	0.384561	1.10133	0.106135	-0.570024	1.23131	-1.22613	0.410649	1.07637	1.10981	0.807091	1.89196	1.09661	-1.19772	-0.506454	0.563039	1.69775
ENSG00000063169	GLTSCR1	protein_coding	3.82504	4.42899	3.63583	2.53512	3.5901	3.19152	3.71063	3.33308	3.6243	3.8132	4.04316	3.35665	3.53663	3.56539	3.54401	3.5035	3.5765	3.73453	3.45526	3.04765	3.26802	3.30053	3.36997	3.37074	3.93166	3.22597	3.51964	3.56099	3.43125	3.31591	3.25541	3.87945	4.07323	3.20905	3.773
ENSG00000063176	SPHK2	protein_coding	3.19289	4.20377	3.22966	3.33707	3.55224	3.38601	3.40036	3.40446	3.71531	3.24745	3.37344	3.52293	2.7692	2.70404	3.32667	3.39371	3.49309	3.66709	3.75882	3.12511	3.84184	3.11812	3.35964	3.08447	4.05985	3.35779	3.56514	2.92666	3.33867	3.47495	3.55414	4.05934	4.55326	3.62933	4.14565
ENSG00000063177	RPL18	protein_coding	9.00685	8.48324	8.48067	7.97285	8.10678	8.33403	8.73101	8.28917	9.43377	8.431	8.71652	7.89563	8.48623	8.46679	8.29916	8.18869	9.0064	8.97798	7.90663	8.3372	8.52749	8.26463	8.17136	8.57704	8.74265	7.97294	8.50457	8.20372	8.13627	9.03714	7.95292	9.0683	9.86269	10.074	8.99976
ENSG00000063180	CA11	protein_coding	4.73643	4.93951	2.6752	3.03728	3.03024	3.48733	4.81611	3.81138	4.934	4.86195	5.10748	2.89971	3.00001	4.10101	4.39614	3.04839	3.69143	2.86645	2.43008	2.66051	3.07138	3.18422	2.73328	3.77303	2.36043	3.36589	5.05	3.52445	4.09952	3.54414	4.14984	2.68629	2.78608	3.73441	4.66388
ENSG00000063241	ISOC2	protein_coding	4.31932	5.63338	3.66206	4.16677	3.55862	3.9447	4.40676	3.84256	4.573	4.17685	4.23295	4.429	3.7449	4.10101	4.30213	4.10886	3.93362	4.98223	4.26708	3.97437	4.77994	3.71807	4.27349	4.08206	4.81139	4.35568	4.86707	3.90537	4.76557	4.75995	4.35375	5.36117	5.38473	5.82214	4.72159
ENSG00000063244	U2AF2	protein_coding	6.62675	7.03356	6.6123	6.08112	6.34557	6.36476	6.15211	6.22529	6.89486	6.36741	6.40195	6.43824	7.42254	6.80827	6.22352	6.19539	6.53644	7.46972	6.39976	6.37624	6.49109	6.11433	7.23403	7.05269	6.78001	6.30805	6.37511	6.23475	6.48337	7.08808	6.09153	7.0774	7.26493	6.65043	6.62523
ENSG00000063245	EPN1	protein_coding	6.01566	7.26617	5.96222	5.77152	5.83262	6.14046	6.10555	5.57125	7.33488	6.35189	6.3903	6.17505	6.10017	6.43089	5.92463	6.15714	5.87558	6.74457	6.37885	5.52462	6.40385	5.8288	6.68277	6.04601	6.67901	5.88458	6.22654	6.16127	6.23465	6.6548	5.96329	6.71872	6.47304	7.02439	6.67374
ENSG00000063322	MED29	protein_coding	5.58343	5.89726	5.25553	5.6395	5.44114	5.41377	5.70407	5.31476	5.71519	5.66228	5.66608	6.11843	5.59976	6.00626	5.5436	5.66714	5.63369	5.57828	5.38893	5.30476	5.75235	5.39258	5.40709	5.56576	5.85016	5.53705	5.60173	5.63202	5.61835	5.82505	5.35478	5.76799	6.25922	5.24939	5.85096
ENSG00000063438	AHRR	protein_coding	0.0423137	0.620687	0.392953	-0.67774	2.26784	0.322448	-0.79167	0.112519	-0.798526	-0.319939	-0.167771	0.535261	0.607042	1.42457	-0.58925	-0.586296	1.00387	0.816296	-0.0853001	-0.235551	-0.189163	-1.02548	1.1202	-0.952914	-1.43151	-0.941243	-0.405473	-0.948902	0.392185	0.11487	1.70116	0.783922	0.813707	2.71621	0.297951
ENSG00000063587	ZNF275	protein_coding	5.39772	5.22868	5.16099	4.8576	6.29201	4.41661	4.65066	5.02429	5.47962	5.15173	4.98313	5.24726	5.91327	5.67568	5.11639	4.98934	5.57406	6.13734	5.04716	5.92699	5.61456	5.67997	5.11626	5.45969	5.61578	5.35869	4.85169	5.46207	5.06222	5.19182	4.74901	4.89164	4.04531	5.12827	5.26059
ENSG00000063601	MTMR1	protein_coding	4.6151	4.38667	3.99689	4.65959	4.49807	4.70587	4.4396	4.57458	3.97411	4.32414	4.11204	4.57501	5.03728	4.75806	4.20703	4.2342	4.13832	5.51256	4.12815	4.53406	4.4207	4.92876	3.98169	5.25238	5.50572	4.44637	4.28928	4.38918	4.51086	4.72126	4.33083	5.02296	4.52658	4.36881	4.59892
ENSG00000063660	GPC1	protein_coding	5.47512	6.85205	5.69563	4.90224	5.99902	5.26189	5.30581	4.85752	5.73085	5.5974	5.45774	4.98283	8.05134	6.13857	5.15653	5.21715	6.27864	7.29365	4.91076	6.41274	5.06555	4.80688	5.03851	7.09614	5.53602	5.72441	5.49194	4.79072	5.01227	7.10321	4.37834	6.10451	4.69055	7.15546	6.46374
ENSG00000063761	ADCK1	protein_coding	2.2763	3.04791	1.48307	2.68074	1.30824	2.10199	1.93097	1.7576	3.4153	2.29323	2.32106	2.42684	1.09941	1.90641	2.15809	2.43198	1.95908	1.88991	2.36968	1.5445	2.40493	1.78331	2.33661	1.77231	2.05054	2.07614	2.9408	2.25774	2.45452	2.55976	2.15464	2.48893	2.23388	3.85503	2.2699
ENSG00000063854	HAGH	protein_coding	4.98888	5.43872	4.39895	3.67967	4.0793	4.25167	4.27421	4.04152	5.8816	4.85139	4.64686	5.08239	4.97922	4.38935	4.47687	4.80535	3.98104	5.70305	5.28136	3.8152	5.66778	3.76201	4.40491	5.08864	4.51477	4.56198	4.8293	4.98853	5.17012	5.35112	5.21614	3.67969	3.65987	4.63903	5.66066
ENSG00000063978	RNF4	protein_coding	5.49633	5.88876	5.7067	5.17919	5.57383	5.53706	5.19357	5.47256	5.77534	5.56222	5.6459	5.61986	6.74315	6.9375	5.35687	5.33493	5.61126	7.12735	5.49345	6.07293	5.33491	5.3952	5.69083	6.61289	6.21374	5.38086	5.5407	5.53328	5.43704	6.45148	5.04621	5.97602	5.80278	5.41007	6.02208
ENSG00000064012	CASP8	protein_coding	4.42091	4.39737	4.06972	5.57389	4.1273	4.89845	4.69213	4.86006	4.02582	4.48764	4.11204	4.27173	4.63787	4.42553	4.45251	4.55179	5.03842	5.18629	4.36508	4.85374	4.68445	5.09583	3.56245	5.24544	5.29053	4.74866	4.29924	4.86892	4.78858	4.6583	4.88966	4.47645	6.11716	4.28778	4.4361
ENSG00000064042	LIMCH1	protein_coding	7.41686	6.768	6.60176	5.1181	6.26398	5.13439	6.33014	5.73528	6.7609	7.09802	6.28096	7.77763	7.83888	6.25172	6.8988	7.72178	5.19492	8.32982	7.87812	6.13916	8.37101	5.32826	4.92513	7.63079	6.59305	7.09177	6.80602	8.22997	6.84196	6.8864	7.55209	5.7405	2.99898	3.89935	6.35614
ENSG00000064102	ASUN	protein_coding	3.98208	3.60889	4.27697	4.67913	3.97106	4.08709	3.7987	3.71359	4.01562	3.77273	4.07586	3.37127	4.7234	4.21565	3.54401	3.5941	3.25827	4.1838	3.67707	3.75798	3.73949	3.14741	4.78417	4.12812	5.95148	3.62418	4.14535	3.69857	4.01619	4.17927	3.58967	4.37042	5.60789	3.75867	4.17203
ENSG00000064115	TM7SF3	protein_coding	5.83025	5.64015	5.81877	6.20379	5.57383	5.72652	5.77575	5.26864	5.57816	6.06552	5.97718	5.70115	5.45538	5.70738	5.44903	5.62665	5.02151	5.41316	5.48369	5.01437	5.64908	5.5379	5.77487	5.18135	6.94018	5.7393	5.5389	5.67896	5.61235	5.58967	5.49537	5.44305	6.34186	4.91666	5.61651
ENSG00000064195	DLX3	protein_coding	-1.43096	-0.0104575	-1.2197	-0.198614	1.46589	-1.27317	-1.72276	-1.92549	-2.11507	-1.54974	-2.25186	-0.785399	-2.13449	-2.59749	-2.02787	-1.28504	-1.67082	-2.47103	-4.08843	-0.288146	-4.08843	-1.45779	0.365611	-2.46701	2.64838	-2.29932	-1.16629	-2.39596	-1.51326	-1.74788	-1.92233	3.98006	1.68711	0.594185	-1.59501
ENSG00000064199	SPA17	protein_coding	1.14327	2.44075	0.823085	2.38678	1.77072	0.971133	1.54989	0.865763	2.3193	1.8874	1.43523	1.39565	1.46582	1.92	1.1991	1.29625	1.36725	1.04602	1.21632	2.07879	0.82967	0.818189	2.19657	1.03041	2.9689	1.6007	1.85486	1.08772	2.19458	1.42615	1.33303	2.23943	2.79057	3.15263	1.21309
ENSG00000064201	TSPAN32	protein_coding	2.18022	1.16228	-0.543865	-0.568339	0.869079	1.62105	0.636369	1.98885	1.46166	0.782548	0.313764	1.83576	1.20891	1.82207	0.206734	-0.454084	2.28611	1.48248	0.497852	1.84236	-0.258083	2.41956	-0.00968005	0.796929	-1.22613	1.5589	0.966436	0.420188	0.222326	1.61485	0.461451	-0.601993	0.181499	0.795189	0.0166508
ENSG00000064205	WISP2	protein_coding	3.81441	5.96713	5.59797	4.60078	6.25909	6.1415	4.21379	3.6737	6.72537	5.14309	6.56093	6.04286	5.26354	4.81008	5.16499	6.4691	4.14615	3.40263	5.81128	4.54537	5.44335	4.53181	1.64749	3.84833	0.385843	5.59335	5.30769	6.24039	5.4351	6.02055	4.45163	-0.360573	2.18696	5.74271	5.90767
ENSG00000064218	DMRT3	protein_coding	-2.34011	-1.98071	0.328911	0.339567	-0.00776592	-1.56625	-1.45793	-1.0963	0.269978	-2.32064	-2.43629	-0.108119	-0.973262	-2.59749	-1.46699	1.17895	-0.733899	-2.47103	-4.08843	-0.584415	-3.32625	-2.42679	-1.6025	-1.87606	-2.12693	-0.863391	-2.10262	-1.96803	-2.77355	-2.97645	-2.76945	-1.66222	-1.65813	-2.41314	-2.83182
ENSG00000064225	ST3GAL6	protein_coding	2.70241	2.65201	3.25573	3.56428	3.46663	3.62711	2.76646	2.8612	3.20709	2.88972	2.83053	3.72228	3.80427	1.92	3.92661	3.0372	2.81054	5.96554	3.48759	3.67455	3.89835	2.91415	2.59332	3.7105	4.93825	3.50448	3.2026	3.68759	3.81872	4.10966	3.97813	2.31593	2.02106	3.57572	5.19991
ENSG00000064270	ATP2C2	protein_coding	-4.08843	-2.87179	-1.665	1.79974	-0.924925	-3.57109	-3.48508	-1.79182	-2.11507	-3.40916	-4.08843	-2.3377	-2.13449	-2.59749	-4.08843	-4.08843	-2.69415	-2.47103	-1.83787	-2.05155	-2.46169	-2.639	0.337807	-0.646859	3.01519	-4.08843	-3.67811	-4.08843	-4.08843	-2.97645	-4.08843	1.82339	-1.0973	1.70072	-2.57623
ENSG00000064300	NGFR	protein_coding	5.14125	5.99557	5.49777	3.03728	4.21473	5.47591	4.81298	5.24744	5.11202	5.66329	4.86087	5.60036	6.66203	6.44741	5.26368	4.75671	5.08257	5.33057	5.96271	5.92627	5.44335	3.98003	3.6583	5.32997	0.534483	6.0659	4.60003	5.01218	6.34638	6.16824	3.44195	2.04935	2.47059	4.58578	4.74081
ENSG00000064309	CDON	protein_coding	6.62726	7.44629	4.62744	5.33076	4.8524	6.83164	7.6258	6.79716	6.80003	7.03019	7.63752	6.31011	5.55898	6.86426	7.76524	6.36106	5.70691	3.45155	5.28648	5.33768	5.83326	5.28937	4.28809	5.54516	3.33603	7.16326	7.4804	6.66327	7.23213	4.42144	7.12158	4.74162	3.44309	4.38226	5.90505
ENSG00000064313	TAF2	protein_coding	5.21044	4.41326	5.22066	5.09646	5.28349	4.50626	4.82079	4.65582	4.44209	4.83004	4.57548	5.02964	6.10135	5.66765	4.71822	4.76352	4.52375	6.19713	4.81209	4.90002	5.24904	4.70784	4.59747	5.88472	6.41846	4.95882	4.74545	5.11545	4.88425	4.99739	4.68802	5.20966	5.12506	3.73441	4.96862
ENSG00000064393	HIPK2	protein_coding	7.42852	7.10871	7.00733	6.09782	6.86765	5.9334	6.63401	6.33121	7.14625	7.49511	6.55011	7.97151	8.47303	7.53319	7.3336	7.42099	5.7563	9.04542	8.43411	7.61337	7.81153	6.38148	6.42727	8.623	6.01613	7.1172	6.99766	7.8927	7.5946	7.51459	7.86666	6.53755	5.66709	4.08894	7.04808
ENSG00000064419	TNPO3	protein_coding	4.8291	5.31018	4.57836	5.74063	4.70921	5.34163	5.10678	5.07768	4.2292	4.80106	4.98543	5.31181	5.49556	4.88994	5.0295	4.96888	4.73384	6.05267	5.22388	4.81374	5.34511	4.93717	5.41376	5.72157	5.11983	5.05092	5.27923	5.21946	5.15721	5.37268	5.23084	5.29341	5.45784	4.46883	5.50677
ENSG00000064489	MEF2BNB-MEF2B	protein_coding	-0.223686	3.21443	1.09746	0.473526	1.07892	0.351408	0.745456	2.09623	3.01575	1.92817	2.42624	1.96982	1.13684	1.24185	1.25652	1.75821	2.21848	1.79201	0.731774	0.71364	2.13617	1.43533	1.44085	0.986638	1.46099	1.37839	1.56542	1.57447	1.46991	2.6952	-0.00559516	1.91806	1.40024	2.74424	2.30211
ENSG00000064490	RFXANK	protein_coding	4.02266	4.83912	4.12733	5.80177	4.123	4.00518	4.09771	4.18019	5.24669	3.84903	4.21741	4.24024	3.4426	4.02129	4.13996	4.207	4.26345	3.98768	3.94883	4.1916	4.54222	3.72364	6.06186	3.27391	6.128	3.96821	3.92795	4.13011	3.99261	4.40293	3.9123	5.85902	5.50575	5.88094	4.24012
ENSG00000064545	TMEM161A	protein_coding	4.0501	4.67739	3.51513	3.88116	3.68647	3.23879	3.57679	3.29977	4.82438	3.55571	3.91167	3.60353	3.52255	3.55236	3.63883	3.72888	3.69499	3.7671	3.62634	3.41559	3.94509	3.25512	4.62073	3.39605	4.68029	3.40181	3.70435	3.74872	3.61411	4.13791	3.5177	4.37042	3.99949	4.80296	3.99368
ENSG00000064547	LPAR2	protein_coding	2.84848	2.89025	2.51175	3.83212	2.53701	2.22445	1.39106	2.1881	2.3682	1.7272	2.06721	2.06877	2.59188	2.41829	1.32522	2.25975	3.21926	3.15931	1.76582	2.29086	2.30096	2.67076	4.10021	2.77922	4.60159	2.18091	1.64786	2.31593	1.49996	2.3342	1.63467	3.9722	3.74564	3.25849	1.50365
ENSG00000064601	CTSA	protein_coding	6.22744	7.57935	6.70431	6.56139	6.26593	7.55663	6.03477	6.07423	7.80558	6.46877	6.87209	7.03306	6.75298	6.82462	6.07084	6.79769	6.56005	6.73801	6.64043	6.47176	6.87839	7.06109	6.93903	6.50455	7.09244	7.0512	6.70561	6.56272	6.51682	7.29416	6.42826	6.91042	6.35898	7.32836	6.65398
ENSG00000064607	SUGP2	protein_coding	5.25436	5.90571	5.11782	5.00428	5.01317	5.09854	4.7341	5.02994	5.15445	4.99264	5.42258	5.10151	5.55207	5.15853	5.04588	5.0943	5.34405	5.85926	5.31278	5.00757	5.09694	5.29406	6.14443	5.59611	5.47845	5.27832	5.2078	5.16113	5.05717	5.29076	5.30326	5.56927	5.45431	5.13755	5.40755
ENSG00000064651	SLC12A2	protein_coding	5.54	4.55853	5.14364	5.20157	5.29405	4.32103	5.07838	4.4603	4.55903	5.12713	4.80215	5.32313	5.93734	5.58155	5.19742	5.05739	4.63169	6.34255	5.58179	5.60343	5.73914	4.45357	4.66196	5.87425	5.22093	5.06343	4.47261	5.18214	5.62604	4.96937	4.89535	4.24559	5.17057	3.50783	4.73197
ENSG00000064652	SNX24	protein_coding	3.10839	3.48399	2.62275	3.66854	2.56263	4.26505	3.6903	2.6832	3.1981	4.13392	3.0172	3.07061	2.86154	3.76308	2.51055	3.05949	2.91189	2.7277	2.95174	2.99359	3.11291	3.30053	2.69544	2.39992	3.231	3.42138	3.06934	2.74799	3.87427	2.51739	2.9835	2.91666	3.20142	2.76492	3.17673
ENSG00000064655	EYA2	protein_coding	3.32356	3.97298	4.44499	5.69952	3.23132	3.25803	2.26915	3.39748	4.83021	4.19645	3.63277	3.82493	3.98447	2.78796	3.25099	3.95086	4.08778	4.23593	4.50677	2.97139	4.63304	3.00838	4.12075	3.93724	7.11298	3.89169	3.96951	4.3687	3.57934	4.00312	3.30756	5.20296	5.57312	5.72611	3.36385
ENSG00000064666	CNN2	protein_coding	7.07967	6.8206	6.50228	6.05144	7.56756	6.74733	5.95893	6.92191	7.50486	6.14189	6.27016	7.24029	6.85267	6.66075	6.09317	6.58651	7.34871	7.70015	6.48319	7.40734	7.3337	6.73671	7.85166	6.8374	6.74343	6.62618	6.25823	6.48719	5.99587	7.10785	5.96533	7.04162	5.96504	8.78479	6.62004
ENSG00000064687	ABCA7	protein_coding	4.19645	4.51499	2.68802	2.78751	3.0164	4.54438	2.58021	4.2651	3.03607	3.39048	4.04756	4.34759	3.87797	3.84016	3.19335	3.51564	4.39619	4.67752	3.83059	3.49555	4.59447	4.04372	3.29604	4.06111	1.89422	4.05096	3.35761	3.78694	3.38771	3.92097	3.97813	3.19844	3.32731	3.71683	3.25698
ENSG00000064692	SNCAIP	protein_coding	4.68678	3.82238	3.0772	1.37579	3.25901	2.91426	4.58796	3.10354	3.87609	4.73748	4.90764	2.8309	3.4124	5.17845	4.29871	3.26532	3.59567	1.86605	2.28228	2.84887	2.12268	2.56929	2.09226	3.30097	1.74353	3.50448	4.2473	4.35951	4.0496	3.12024	2.64141	1.18297	1.29037	2.28175	4.2811
ENSG00000064703	DDX20	protein_coding	3.47071	3.05469	3.71939	4.04077	3.71816	4.05884	3.42106	3.65625	3.95823	3.55137	3.71257	4.08342	5.27408	3.81855	3.47615	3.51564	3.74392	5.16445	3.31817	3.97994	3.77872	3.96366	3.70257	5.24776	4.27378	3.7158	3.89457	3.565	3.5545	4.99121	3.52873	4.40001	4.36132	3.5679	4.30116
ENSG00000064726	BTBD1	protein_coding	6.44	5.66138	6.30471	6.13822	6.27999	6.5111	6.11193	5.81145	6.30851	6.41958	5.78621	6.35614	7.36899	6.90412	6.12531	6.31778	6.13011	7.6047	6.37837	6.40914	6.80586	6.4376	5.53885	7.19049	6.08465	6.51625	5.90852	6.28417	6.36793	6.77569	6.24093	5.68196	5.56855	5.34975	6.33587
ENSG00000064763	FAR2	protein_coding	3.09088	3.291	3.11091	2.20611	2.84431	3.67658	2.97125	2.20419	3.77696	3.8132	3.12529	3.39052	3.78082	4.01814	2.75425	3.35368	2.91799	2.82992	3.40348	2.4112	2.72365	3.70968	2.18881	3.50478	2.39195	3.52272	2.68287	3.69126	3.38771	3.29097	3.04624	2.10215	3.16383	1.10731	3.94861
ENSG00000064787	BCAS1	protein_coding	-1.07425	1.84807	-0.669057	-1.71299	-1.15611	-1.10638	1.60883	0.303884	-0.798526	0.752593	0.284219	-0.475468	1.24364	4.62125	1.86695	1.19917	-1.28698	-2.47103	-1.07988	-1.13901	-0.863067	-1.45779	-2.11445	0.248576	-0.964254	0.209184	0.784034	0.384381	0.292687	-1.74788	-3.09089	0.209185	-1.3116	-0.799279	1.94218
ENSG00000064886	CHI3L2	protein_coding	3.19289	2.37733	0.956224	1.13823	2.57527	1.98674	2.54291	2.1881	1.30305	1.07656	0.865863	3.8107	2.8276	4.59183	2.40659	2.05306	2.43826	5.7608	1.10957	3.65379	3.57091	1.93499	0.546539	2.05259	-0.964254	2.66099	0.734588	0.555143	3.05471	4.58837	0.228827	-0.846905	0.0377811	1.25103	2.95156
ENSG00000064932	SBNO2	protein_coding	7.118	6.7757	7.06006	4.83039	6.37116	5.15917	5.87363	5.42358	7.11317	6.37787	5.65818	7.18174	8.22324	8.15267	5.74572	5.94075	5.52791	8.55847	5.61225	6.65834	7.18017	5.37941	5.47806	8.3465	6.35139	6.11961	5.80253	5.77197	5.9813	8.10433	5.27298	6.06701	6.32764	5.75482	6.86781
ENSG00000064933	PMS1	protein_coding	4.22883	3.48399	4.05495	4.19614	3.80926	4.07629	3.86366	3.84513	3.93678	4.43439	4.093	4.0505	3.94808	3.9634	4.07562	4.18181	3.897	3.95412	4.19277	3.26401	4.26054	4.06142	4.07937	3.63808	4.06475	4.15284	3.79558	4.14356	4.17364	3.69626	3.96737	3.20382	4.60772	3.42364	3.66568
ENSG00000064961	HMG20B	protein_coding	5.00767	6.15455	5.08911	5.04574	4.78054	5.01955	4.98553	4.8626	5.92447	4.91869	5.09371	5.12181	4.75383	4.94249	4.95124	4.97915	5.28977	5.33275	4.90012	4.41161	5.32611	4.69514	5.69357	4.47949	5.34691	4.94671	5.03816	4.92607	5.01617	5.45245	4.75058	5.27627	6.18397	5.96302	5.36435
ENSG00000064989	CALCRL	protein_coding	6.83828	5.67464	6.89779	5.20157	7.37269	5.7694	7.78621	6.5158	5.83598	7.22549	5.7298	7.21046	8.73857	7.05533	7.50885	6.60605	6.83468	8.83762	6.88355	7.6118	7.10712	6.58212	5.55025	7.95724	3.5149	7.22944	7.03005	8.30954	7.71399	7.59576	7.39349	2.98386	4.21028	3.26818	7.70453
ENSG00000064995	TAF11	protein_coding	4.73267	4.49272	4.46933	4.21348	4.91092	4.37843	4.12573	4.24773	5.01556	4.43203	4.52269	4.52143	5.23793	4.8119	3.99989	4.51798	4.7459	5.50099	3.77927	4.69174	4.8076	4.66797	5.05781	4.78916	4.86573	4.26975	4.33976	4.46399	4.16897	4.90343	3.84919	4.78623	4.94339	4.45192	4.68846
ENSG00000064999	ANKS1A	protein_coding	5.70445	5.60251	5.50775	4.78085	5.81608	5.0139	4.90257	4.96295	5.44585	5.85169	6.46585	5.48752	5.39873	6.05942	5.25314	5.41708	5.28624	5.64114	6.42084	5.38148	5.49923	5.81843	5.66098	5.47759	5.31232	5.42127	5.82535	5.9578	6.05906	5.7465	5.62348	5.40386	5.87275	4.82282	5.8414
ENSG00000065000	AP3D1	protein_coding	6.2261	7.16495	6.19671	5.71042	6.23041	6.07523	6.26749	6.1494	6.40149	6.44321	6.58271	6.29039	6.87845	6.80232	6.32807	6.20917	6.1288	7.49278	6.28947	6.17238	6.59916	5.97307	6.77734	6.76719	6.27314	6.28205	6.67754	6.21577	6.48525	6.74571	6.064	6.30614	7.09265	6.35156	6.83069
ENSG00000065029	ZNF76	protein_coding	4.41154	5.09215	4.13203	3.90981	4.25849	3.99604	4.23966	3.98676	5.19341	4.25103	4.63228	4.71715	4.28046	4.77872	4.08357	4.18942	4.64279	4.33919	4.46769	4.23418	4.62589	4.22931	4.33455	4.59513	4.64965	4.22143	4.558	4.36182	4.11417	4.98966	4.24874	4.01872	4.89729	5.01776	4.75543
ENSG00000065054	SLC9A3R2	protein_coding	6.25914	6.60799	6.25496	5.51762	5.48786	5.35421	5.9688	5.01063	8.52655	6.16766	7.01017	6.80046	6.67003	6.03074	5.82851	6.66767	5.74861	5.89949	7.36631	5.26196	6.63998	4.30738	5.59204	5.99308	6.59939	5.8241	6.54069	6.10394	6.0578	6.79666	5.59141	5.56614	5.37354	6.73713	7.455
ENSG00000065057	NTHL1	protein_coding	2.52255	3.3194	2.80445	3.02424	2.46412	2.42167	2.11504	2.26682	3.6509	2.22942	2.99913	2.41748	1.85081	1.3462	2.20988	2.8062	2.85576	1.45075	2.70523	1.90227	2.66901	1.67255	3.65548	1.65138	4.5778	2.37007	2.66978	2.29679	2.49984	2.21197	2.35792	2.62346	3.54495	4.7469	2.46035
ENSG00000065060	UHRF1BP1	protein_coding	4.28893	4.72911	4.29803	4.3187	4.38235	4.92879	5.48757	4.43836	4.50174	5.21488	5.06251	5.86241	4.90251	4.48845	5.10959	4.2293	3.85626	5.68271	5.26176	4.63638	4.85528	4.43503	4.97111	5.30457	4.91402	5.05217	5.4044	4.69895	5.67954	4.94079	5.47176	4.86897	4.8126	3.57572	5.301
ENSG00000065135	GNAI3	protein_coding	6.91987	6.17412	6.49409	6.53481	6.54429	6.65815	6.24677	6.16849	6.84679	6.64727	6.19525	6.69937	7.37242	7.26154	5.99327	6.73717	6.34584	7.53926	6.11879	6.48014	7.09982	6.44183	5.93712	7.43782	7.16494	6.78458	5.92147	6.72183	6.2491	6.794	5.966	6.23207	6.5055	5.9283	6.05553
ENSG00000065150	IPO5	protein_coding	7.34267	7.26398	7.06006	6.96041	7.28907	6.76492	7.95187	6.96269	7.28588	7.65976	7.52697	7.42029	8.57072	7.77928	7.62717	7.28627	6.68164	8.66256	7.48516	7.28414	7.99302	6.73946	6.84895	8.62968	6.74496	7.24819	7.49533	7.60228	7.64674	8.0045	7.55726	7.20392	7.49578	6.60241	7.88832
ENSG00000065154	OAT	protein_coding	7.25826	6.96466	6.69441	7.24222	6.75097	6.4132	6.92783	6.54807	6.62248	7.09318	6.55243	6.71378	7.40826	7.38212	6.7741	7.01577	6.73448	6.94862	6.56163	6.67518	6.85564	6.45987	6.16386	7.11881	6.4706	7.21184	6.83025	6.87845	6.96321	7.00195	6.65652	5.85859	5.12239	5.95854	6.59791
ENSG00000065183	WDR3	protein_coding	4.43486	4.40003	5.12726	5.2768	5.09775	4.28207	4.7877	4.56215	4.3065	4.77149	4.55398	4.8005	7.21398	5.70443	4.93924	4.62276	4.34953	7.19356	4.97044	5.51698	5.00618	4.49972	4.92046	6.90326	6.13442	4.45968	5.06675	4.76658	5.06725	6.45934	4.65821	5.47175	6.0625	4.83591	5.9057
ENSG00000065243	PKN2	protein_coding	6.28695	5.39402	5.5275	5.71448	5.95858	5.33983	6.23395	5.83101	5.07322	6.07614	5.78027	6.65329	6.09186	6.00706	6.24982	6.19602	5.22478	6.96486	6.11419	5.58253	6.78192	5.57763	5.03743	6.38689	5.39632	6.13628	5.9854	6.3884	6.61234	5.95458	6.72763	5.22297	5.45855	4.05296	5.7237
ENSG00000065268	WDR18	protein_coding	3.54546	4.81738	3.475	3.42238	3.20716	3.24265	3.17513	3.28472	4.42294	3.76899	3.39779	3.34683	4.2594	3.20918	3.58661	3.30785	3.70914	3.8115	3.31417	3.51487	3.58081	3.09683	4.80843	3.62386	4.45446	3.52272	3.45242	3.39996	3.32614	3.94675	3.47273	3.71213	5.59125	5.16634	3.99861
ENSG00000065308	TRAM2	protein_coding	5.54537	7.10749	5.85191	5.32457	6.56385	6.43239	6.02939	6.47327	5.85183	6.26172	6.2286	6.06175	6.95707	6.36597	6.56133	6.37945	6.59286	5.67758	6.13928	6.57291	5.8751	5.93219	6.11811	6.09063	5.20991	6.87111	5.85987	6.31302	6.10072	5.77467	6.00205	5.92319	4.85074	6.02719	5.87525
ENSG00000065320	NTN1	protein_coding	3.03704	3.75743	5.42784	2.63572	3.10188	2.1928	3.77958	2.80427	2.78314	3.96786	4.25977	3.60765	4.23371	4.5267	3.34663	4.00068	2.79735	3.03642	2.7174	2.03664	2.98455	2.1895	3.13977	3.30988	3.48232	3.07102	3.96237	2.40797	3.37155	3.40229	2.67488	5.17858	4.80596	1.6122	3.91255
ENSG00000065325	GLP2R	protein_coding	2.98744	1.57411	0.0793172	1.10558	2.06768	1.44415	2.38327	0.845386	4.32726	2.50569	4.36229	4.06855	3.12635	4.17372	3.21886	3.18648	1.7004	2.92536	3.35757	2.34366	3.64356	1.79394	2.78568	4.37302	-2.53764	2.94144	3.95159	3.44411	2.49239	3.87472	3.09651	-0.846905	-2.11511	0.795189	3.6407
ENSG00000065328	MCM10	protein_coding	2.15797	2.29964	3.35151	3.10904	1.06105	-0.583604	-1.13421	0.39082	1.96394	0.782548	2.30644	1.43327	0.80605	2.21281	-0.0474565	-0.221255	-0.07051	2.80503	0.994295	0.00201013	0.926021	0.267278	4.07306	1.54976	4.63326	1.34598	1.14105	1.25568	0.782851	2.14674	-0.285641	3.10091	3.99366	-0.156749	1.31132
ENSG00000065357	DGKA	protein_coding	5.02621	4.8094	4.23609	3.40236	4.79412	4.47535	4.05331	5.02881	4.53424	4.0502	4.18779	3.75236	4.67333	4.9071	3.87254	3.78348	5.46363	4.20297	3.83896	4.84002	3.48916	5.13291	3.63849	4.37302	3.09397	4.59339	3.87379	4.31741	3.62096	4.47999	3.86377	3.98006	4.65651	4.32539	4.07283
ENSG00000065361	ERBB3	protein_coding	2.61528	2.94231	4.88573	6.06211	4.49973	-0.159257	5.13085	1.64421	3.09535	2.88283	3.27173	2.2271	1.6583	3.59535	2.53975	0.835682	3.50125	2.14913	2.79408	3.67455	1.58726	2.67651	3.34225	1.40763	6.9541	1.3295	3.36846	0.971854	3.45829	2.77651	2.4536	7.10426	7.41191	4.8713	2.64121
ENSG00000065413	ANKRD44	protein_coding	3.89397	3.12716	2.39931	2.71361	3.52643	4.03226	2.67289	4.07253	0.269978	3.37089	2.96695	3.53596	3.14484	3.60799	2.70354	2.37978	3.14313	3.35199	2.90994	3.66421	2.96955	4.51586	3.34923	3.53168	1.86082	3.78694	2.52217	3.32638	2.92227	2.7253	3.52506	2.09638	2.01339	1.55002	2.2286
ENSG00000065427	KARS	protein_coding	6.40264	6.44678	6.35632	6.2812	6.01534	6.19889	6.45936	6.05051	6.9949	6.26039	6.61087	6.47985	7.08347	6.5206	6.20495	6.16551	6.25412	7.59203	6.26998	6.22904	6.79739	6.07676	5.70245	6.98269	7.3174	6.08566	6.63072	6.23349	6.57533	7.436	6.32293	6.52283	7.48629	7.45225	7.26559
ENSG00000065457	ADAT1	protein_coding	3.72644	4.09628	3.75333	2.84302	3.5618	3.6182	3.6903	3.14164	2.74662	3.75017	3.18247	4.14707	4.38915	3.88589	3.69702	3.27488	3.3195	4.75101	3.64239	3.76445	3.96034	3.76741	3.29604	3.92859	4.24602	3.97617	3.53417	3.85393	4.28139	3.6182	3.86957	3.14632	3.48525	2.51119	4.03978
ENSG00000065485	PDIA5	protein_coding	4.42091	5.33543	4.99809	4.75345	4.72489	4.08062	4.48159	4.29921	4.65081	4.2802	4.21741	3.10599	4.65086	4.75995	4.03518	4.1484	4.58258	3.71462	3.69564	4.98142	3.4944	3.94709	3.55341	3.72722	6.06462	4.54066	3.94073	4.15157	3.96863	4.20353	3.05643	4.4831	4.98709	5.89195	3.85128
ENSG00000065491	TBC1D22B	protein_coding	3.88384	3.99075	3.20757	3.01987	3.83051	3.4034	3.48145	3.28093	3.61758	3.69611	4.11414	3.75978	3.85569	4.04008	3.24746	3.54754	3.2389	4.34352	3.44432	3.73181	3.73949	3.41849	3.88414	4.11801	4.38566	3.29126	3.66969	3.17217	3.58637	4.04251	3.25541	3.97692	4.1643	3.71683	3.89682
ENSG00000065518	NDUFB4	protein_coding	5.48521	6.26234	5.35132	5.67052	5.19309	5.29301	5.61613	5.18191	7.17287	5.57725	5.55217	5.70884	5.39294	5.6299	5.30764	5.50094	5.4792	6.38933	5.42183	5.62581	6.11286	5.08181	5.01236	5.68009	5.26734	5.41641	5.71388	5.54954	5.77249	6.50668	5.59753	5.97955	6.78242	5.97711	6.30341
ENSG00000065526	SPEN	protein_coding	6.75318	6.34892	6.6026	5.96365	6.31574	5.99835	6.1081	6.02128	5.89418	6.93463	6.71592	6.50381	7.46225	6.96439	6.39071	6.18402	5.91579	8.12045	6.62558	6.41634	6.58693	5.88639	5.57428	7.46275	6.42037	6.15628	6.86513	6.52827	5.96591	6.80901	6.1155	6.69648	6.52483	5.2072	6.86242
ENSG00000065534	MYLK	protein_coding	7.94938	6.7798	9.23452	6.97149	7.97689	7.61862	7.41646	7.28531	6.87667	6.67498	7.68493	7.71026	8.11691	7.64303	7.68566	7.64231	8.40428	6.85702	7.21737	7.81286	6.70366	7.36925	7.07839	6.74067	7.11564	7.86146	7.62635	6.94526	6.99686	8.57192	6.3666	6.10091	5.95007	6.82877	8.50514
ENSG00000065548	ZC3H15	protein_coding	6.17785	5.27871	6.84045	5.87321	5.69244	5.64114	5.49149	5.29518	5.61408	6.07463	5.40895	5.81064	7.39625	6.31223	5.43044	5.57051	5.47403	7.54866	5.74522	6.09428	6.23544	5.55205	5.37325	7.2218	6.6834	5.69093	5.48697	5.76066	5.66552	6.63808	5.38947	5.38563	6.55022	5.26399	6.00261
ENSG00000065559	MAP2K4	protein_coding	5.05959	4.84304	4.66521	4.63692	5.12916	4.86872	5.02122	4.76427	4.8533	5.1745	4.99115	5.29658	5.91462	5.66865	5.03669	5.06016	4.98418	6.15467	4.87182	5.10384	5.29035	4.73152	4.21737	5.91641	4.32571	5.18407	5.21908	5.17692	5.01747	5.75565	4.88966	4.42441	4.17807	3.89935	5.32765
ENSG00000065600	TMEM206	protein_coding	1.70006	2.63403	1.86814	2.72977	2.78024	3.78405	1.93097	2.13871	2.18018	2.03158	2.13498	1.68795	2.13603	2.08593	1.6907	1.71672	2.33255	1.51353	2.19795	1.92555	0.761664	2.50609	3.13977	1.33967	3.36014	2.90297	2.09582	2.1011	2.09964	1.63084	2.27303	3.36374	2.04381	2.55934	1.7098
ENSG00000065609	SNAP91	protein_coding	-0.0582803	-2.51018	-0.669057	-2.66858	0.948959	0.101607	-0.79167	0.242873	-0.798526	-0.679548	-0.209191	-0.163209	0.0232458	-0.314958	-0.58925	-1.40202	0.417096	-4.08843	-2.34462	-0.0424754	-0.330462	3.44e-05	-1.6025	-1.72287	-2.53764	0.135251	-0.333395	-0.241174	-1.51326	-1.92356	-0.844902	-2.62904	-1.39075	0.465354	-1.01636
ENSG00000065613	SLK	protein_coding	7.63516	6.49737	7.06037	6.4254	6.93754	6.40157	7.27237	6.33304	6.20577	7.38349	6.88752	7.25776	8.27741	7.87832	6.86025	6.80925	6.29691	7.60019	6.61586	7.05261	7.11097	6.37043	5.84568	7.89145	5.30819	6.84235	6.92789	7.12519	6.94352	6.85526	6.89676	5.45832	4.37783	4.7136	6.80246
ENSG00000065615	CYB5R4	protein_coding	4.51363	4.03252	4.1645	3.82462	4.14648	5.16122	4.6853	4.31597	3.68346	5.06298	4.06504	4.55168	4.68285	5.14123	4.10327	4.31055	4.14615	5.24528	4.26915	4.24578	4.41241	4.98199	3.47262	4.95733	3.69628	4.84891	3.96237	4.75436	4.48668	4.16011	4.41446	3.02394	3.73636	2.56721	4.02539
ENSG00000065618	COL17A1	protein_coding	1.35366	1.98201	-1.12697	-1.60099	1.04296	-1.56625	1.62319	-1.26327	-0.121803	0.20738	-0.591913	-1.18066	0.552684	2.0493	-0.807244	-1.28504	-0.812573	-0.584944	-1.83787	0.417778	-1.5345	-0.817149	0.0936837	-0.579513	-0.278403	-0.789526	-1.0462	-1.14426	1.80689	0.402539	-1.09273	-0.846905	-1.75953	-1.9872	-0.489748
ENSG00000065621	GSTO2	protein_coding	-0.70456	-0.638164	1.63645	4.85515	2.79653	-1.18737	-0.453458	0.0426408	0.684587	-1.27834	-0.766412	-0.475468	-1.81569	-1.27373	-0.35622	-0.657242	0.417096	-2.05199	-0.043635	1.91396	0.452187	2.2055	3.29242	-0.870101	3.93968	-1.02354	-0.603197	-0.298222	-0.851023	0.402539	-0.138834	3.91759	2.68839	5.10819	-0.23741
ENSG00000065665	SEC61A2	protein_coding	1.74553	1.21159	2.72581	2.22902	1.68	1.63289	1.62319	1.49522	2.28576	1.91471	1.93086	1.25564	1.85081	1.46221	1.46574	1.5056	2.38638	2.00363	1.93167	1.74102	1.37607	1.71788	3.71613	2.2226	1.9588	2.01562	1.75093	1.86168	1.48502	2.41952	1.60719	2.41201	3.50998	1.8883	2.18608
ENSG00000065675	PRKCQ	protein_coding	2.50503	0.856007	1.73857	3.61445	2.14603	2.16859	0.389817	2.64834	1.12482	0.782548	1.27924	1.2765	1.27755	1.17541	0.0531848	0.486625	2.79735	2.00363	1.55147	1.95978	0.690294	3.49536	0.685388	1.26834	2.73081	1.36228	1.10259	1.40611	1.23995	1.63084	0.264445	2.52376	4.35071	3.13156	1.24658
ENSG00000065717	TLE2	protein_coding	4.44867	5.21514	4.64891	3.68244	3.88229	3.03966	3.95452	3.41141	5.85469	4.63037	5.19641	4.422	4.45361	4.23752	3.83298	4.04605	3.79124	3.98214	4.63258	3.96316	4.55232	3.37317	5.10084	4.39202	3.40331	4.4096	5.0064	4.25185	4.34899	5.12707	4.0816	3.79999	2.02868	4.179	4.53428
ENSG00000065802	ASB1	protein_coding	4.32432	5.15338	4.13438	3.98801	3.96627	4.5754	4.55649	4.66165	4.99754	4.89146	4.8967	4.80588	5.65241	4.48845	4.85113	5.17693	4.90341	5.63762	4.79065	4.99387	5.49138	4.54759	3.95677	5.63384	3.83749	5.00236	4.96322	4.88982	4.74218	5.11717	4.89393	3.72528	3.68662	3.86465	5.26059
ENSG00000065809	FAM107B	protein_coding	7.73129	6.26963	5.7067	5.5384	6.03664	6.25888	6.76691	6.28183	7.15325	7.11615	6.26308	7.50113	7.39529	7.89002	6.29033	7.35069	5.95565	8.36136	7.17526	6.65704	8.00157	6.37265	6.04906	7.89127	5.19324	6.59334	6.63185	7.4582	6.69464	7.30292	7.17139	4.87993	4.72028	4.9335	6.54548
ENSG00000065833	ME1	protein_coding	5.94838	5.70724	3.85061	3.16951	3.70671	5.10281	5.40268	5.5135	5.15677	5.71566	4.83945	6.09368	5.95579	5.21474	6.03078	5.90964	3.25345	8.54749	6.18162	4.75809	6.74166	4.5924	2.7492	5.69462	3.09875	5.55665	6.1765	5.70732	7.44333	6.11665	6.65317	1.69177	2.26003	2.35631	6.77834
ENSG00000065882	TBC1D1	protein_coding	6.56785	6.29988	6.3099	5.84382	6.20012	6.72052	6.03745	5.73459	6.21471	6.26304	6.28609	5.99962	7.0341	6.62749	5.92685	5.92262	6.60094	6.72563	5.90403	6.08332	5.88811	6.26795	5.72678	6.41141	5.68899	6.26969	5.93567	6.14932	5.83866	6.63561	5.41148	5.96022	5.44366	5.91911	6.64655
ENSG00000065883	CDK13	protein_coding	5.5216	5.41917	5.13664	5.47112	5.45574	5.37287	5.29799	5.33956	5.24669	5.4158	5.6291	5.5064	5.9584	5.69062	5.45057	5.40734	5.30499	6.29531	5.31077	5.32897	5.69311	5.14333	4.89683	5.68695	4.45446	5.40071	5.49627	5.42399	5.41158	5.56492	5.24205	5.47287	5.72162	4.97846	5.52735
ENSG00000065911	MTHFD2	protein_coding	6.98135	4.99162	7.7104	6.71029	6.82296	5.51563	5.06134	4.81361	5.91078	6.56078	5.94037	4.87928	8.59403	7.51735	4.90374	5.32461	6.57026	8.41116	5.85737	7.241	5.71462	6.5038	5.94405	8.28783	8.47679	5.91941	5.12227	6.65718	5.53191	7.44083	4.61747	6.91657	5.63561	5.34404	6.44132
ENSG00000065923	SLC9A7	protein_coding	1.86021	1.49664	0.79965	2.94342	2.53701	2.87491	0.918512	1.90272	-2.52712	0.722002	0.0929943	0.311086	0.552684	1.32593	0.318796	-0.731858	1.56692	-0.459051	0.349382	2.03664	-0.189163	2.92385	3.05693	0.455392	2.3282	2.08599	0.517884	0.384381	0.454899	-0.725071	-0.00559516	3.67388	0.625427	1.6122	-0.383461
ENSG00000065970	FOXJ2	protein_coding	5.60723	5.40995	5.55049	4.31335	5.38481	5.12079	5.36257	5.18394	5.48147	5.38806	5.48153	5.52176	5.46829	5.46238	5.58412	5.48249	5.40508	5.52785	5.22282	5.21549	5.25059	4.95385	4.91341	5.49917	4.99066	5.39676	5.66413	5.69183	5.08222	5.15083	5.21158	4.94802	4.97728	4.64275	5.6419
ENSG00000065978	YBX1	protein_coding	8.99572	9.03361	8.93186	9.40983	8.40212	9.16194	8.72415	8.18253	9.51212	9.074	8.63841	8.94055	9.93919	9.19148	8.38735	8.78452	8.80786	9.96268	8.8748	8.76001	9.38904	8.79959	10.8648	9.62919	9.6334	8.75701	8.65307	8.83057	8.93418	9.66326	8.48691	8.86093	9.26275	8.7385	9.30595
ENSG00000065989	PDE4A	protein_coding	4.99674	5.58156	4.34128	4.37799	4.45597	4.90335	4.36034	4.5823	5.1775	4.84253	4.79038	5.30295	4.97405	5.36886	4.82764	5.11175	5.01155	4.62873	5.09574	4.80121	4.91716	4.58477	4.28809	4.56196	4.02005	5.15279	4.77836	4.79584	4.71522	4.70625	4.572	3.67582	3.85903	4.84888	4.29317
ENSG00000066027	PPP2R5A	protein_coding	6.5364	6.58478	6.2848	7.20129	5.8875	6.01768	6.56359	6.4418	7.25966	6.2861	6.49878	7.71719	6.91661	6.39241	6.43024	6.93139	5.85822	7.68318	6.83132	6.37994	7.66653	5.57379	4.95518	7.05798	5.04	6.46247	6.5624	7.14338	7.02877	7.27934	7.42555	5.34543	5.21385	5.5337	6.78227
ENSG00000066032	CTNNA2	protein_coding	-1.07425	0.545745	1.32789	2.98888	1.70322	-4.08843	-0.952799	-2.07284	-3.10613	0.162521	-0.167771	-0.546934	-0.444895	-0.448285	-1.06414	-0.020831	-2.4233	-2.05199	-2.81969	-2.24593	-0.974643	-1.79719	3.03545	0.00706981	-0.49195	-1.64991	-0.935337	0.0144581	-1.01134	-0.897828	0.607281	1.73699	3.28655	1.25103	-0.191836
ENSG00000066044	ELAVL1	protein_coding	6.03867	5.99028	5.97797	5.95451	5.93976	5.75592	5.81695	5.81145	6.09877	5.84194	5.66034	5.91821	6.86805	6.47817	5.88877	5.92186	5.83825	7.08857	5.93823	6.01306	6.18116	5.56296	6.26835	6.58289	6.8135	5.92833	5.59482	5.8699	5.97396	6.37106	5.6765	5.9297	6.35822	5.82132	5.81164
ENSG00000066056	TIE1	protein_coding	7.3014	7.12207	6.96911	4.64546	5.73672	5.10494	6.1912	5.53115	7.42911	6.63603	7.13231	6.33766	7.41732	7.51567	6.1492	6.79188	5.65486	6.84487	7.10579	5.74266	6.37995	4.70643	5.35256	6.17105	3.68678	6.20283	6.13303	7.28058	6.30016	6.4969	5.94968	3.45904	3.87392	4.05576	6.1043
ENSG00000066084	DIP2B	protein_coding	5.59899	5.12631	5.00835	5.47112	5.37219	5.34434	5.52343	5.15111	5.29385	5.38073	5.48478	5.56795	5.67803	5.74413	5.322	5.22457	4.80309	5.55795	5.35331	5.1178	5.19366	5.79548	5.14061	5.62316	5.19324	5.61392	5.28067	6.23663	5.49694	5.06369	5.36814	5.3509	5.25586	4.39779	5.08659
ENSG00000066117	SMARCD1	protein_coding	5.18316	5.78159	4.97866	5.7246	5.55321	5.02518	5.08877	4.94031	6.02318	5.20385	5.49529	5.39997	5.81855	5.45657	4.97175	5.05739	5.01867	6.08274	5.2078	5.31471	5.34946	5.01528	5.91729	5.73072	5.42327	4.96816	5.45807	4.88021	5.12141	6.05503	4.92625	5.55092	5.91347	5.81307	5.87525
ENSG00000066135	KDM4A	protein_coding	4.79166	5.90008	4.98257	5.95852	5.3866	5.35152	5.5196	5.3702	4.60735	5.18154	5.23263	5.11025	4.58468	4.7843	5.3845	5.28613	4.77478	4.68436	4.92918	4.54161	4.95761	5.14852	7.08127	4.55823	6.09306	5.20002	5.11424	5.29131	5.38465	4.21948	5.03723	5.98386	5.82758	5.61092	5.13545
ENSG00000066136	NFYC	protein_coding	5.01232	5.37926	5.20959	5.29502	4.88957	5.09641	4.98135	4.85625	5.57643	4.80471	5.17544	5.04339	5.29285	4.998	4.97496	4.93461	5.26004	5.63056	4.79353	4.78539	5.20651	4.99701	7.22386	4.88913	5.68024	4.85612	5.13026	5.13174	4.96322	5.36792	4.89108	5.24074	5.82429	5.62135	5.26469
ENSG00000066185	ZMYND12	protein_coding	1.63712	1.30545	1.13539	2.44666	0.065742	1.16303	1.56485	0.599893	1.87651	1.91471	1.29414	1.3373	1.37475	1.17541	0.565918	1.29625	0.610422	1.24414	1.21632	1.16869	1.91922	1.04856	3.61552	1.17392	-0.0924277	0.501728	1.03612	1.57447	0.600701	1.14364	0.972889	0.351682	1.81606	3.1209	0.826898
ENSG00000066248	NGEF	protein_coding	-0.62525	2.43037	1.71371	1.94521	1.55793	0.874684	0.211152	0.146228	-1.79493	-0.76363	-0.766412	-1.56974	-0.973262	-1.04528	-0.399912	0.155115	2.29552	-3.06403	-1.57788	1.6461	-1.71651	1.55256	2.16527	-1.04077	3.52204	0.694242	0.498266	-1.25285	-2.5113	0.673488	-1.28529	2.08476	2.89019	2.80541	0.870515
ENSG00000066279	ASPM	protein_coding	1.84636	3.07482	2.5261	5.68785	1.6564	0.705553	1.44057	2.53839	1.92088	1.81678	0.580045	0.389746	-0.685024	3.09999	1.42875	-0.020831	1.43692	-0.0430201	0.707578	1.2072	0.0576662	1.63759	4.76211	-0.870101	4.52013	1.96316	0.0900576	0.87196	1.04989	-2.12365	0.521563	5.07379	5.83303	0.624672	-0.333116
ENSG00000066294	CD84	protein_coding	4.61101	5.26709	4.15068	5.47911	4.9159	7.64736	5.12203	5.19707	3.65747	6.51244	4.45636	4.76773	4.43119	5.58262	3.99568	4.25609	5.30149	4.13472	4.65014	4.90735	3.44648	7.45165	4.73306	3.47737	4.64965	6.93037	4.44085	5.39054	4.75626	3.86461	5.13187	4.14991	3.26412	3.72036	3.78159
ENSG00000066322	ELOVL1	protein_coding	5.3222	6.43125	5.63154	5.78962	5.15149	5.40603	5.54811	5.1122	6.75478	5.62866	5.7298	5.71554	6.12133	5.76969	5.47042	5.63966	5.15929	6.27394	5.68143	5.38358	5.58166	5.38205	6.39095	5.89586	5.69769	5.53974	5.70107	5.47914	5.72159	6.37641	5.41643	5.82887	6.11537	6.201	6.21259
ENSG00000066336	SPI1	protein_coding	4.01958	5.75792	3.78052	4.18837	4.12944	6.48111	4.4875	4.37758	4.98192	5.58151	4.19377	5.36267	5.18977	5.63712	3.52953	4.47923	4.69349	4.5448	4.84435	4.33326	4.65429	5.56838	3.95677	5.71068	5.06344	5.66735	4.16881	5.05124	5.06473	4.55733	4.39852	3.96746	3.72232	5.24203	4.18505
ENSG00000066379	ZNRD1	protein_coding	3.32356	3.36915	3.35151	2.48524	4.04335	3.2232	3.50879	3.05112	4.46849	2.75268	3.24131	3.50095	4.28463	3.99264	3.19702	3.36715	4.0013	4.57455	2.99737	3.41147	3.99407	3.30425	4.10846	4.24883	4.48949	3.41358	3.47266	3.68392	3.3634	4.46669	2.99415	3.78392	4.1712	4.61645	3.92035
ENSG00000066382	MPPED2	protein_coding	1.73053	1.23564	2.05788	1.97262	2.31382	1.07896	1.32229	1.46882	2.16181	2.79002	2.16771	1.43327	1.93821	1.76297	1.61589	1.65949	1.88623	1.54393	2.20661	1.2992	2.05326	1.21589	1.6921	1.75937	5.35693	1.75677	1.98036	2.02175	1.7329	1.83788	1.28181	3.26685	2.91096	2.73029	1.54461
ENSG00000066422	ZBTB11	protein_coding	5.01387	4.01179	4.70359	4.57119	5.13984	4.98762	4.4109	4.98291	3.57656	4.76588	4.1838	4.79147	5.7924	5.30555	4.59982	4.49158	4.64095	5.93289	4.47487	4.79806	4.94617	4.58017	4.63365	5.88993	4.84879	4.7268	4.5135	4.74026	4.45634	4.82741	4.47272	4.60803	4.6651	3.4193	4.52408
ENSG00000066427	ATXN3	protein_coding	5.2319	4.35135	5.21403	4.60516	5.22353	4.8849	5.15824	4.95703	4.30231	5.21488	4.40581	5.68175	5.41596	5.29777	5.23183	5.44805	4.6205	5.40076	5.15286	4.74833	5.51222	4.61504	4.38467	5.32777	3.61513	5.25233	4.32173	5.47808	5.22626	4.3411	5.51953	3.91432	4.37035	3.20401	4.13227
ENSG00000066455	GOLGA5	protein_coding	5.37981	5.75376	5.50594	5.38872	5.5444	5.39216	5.33447	5.1281	5.34156	5.53498	5.45027	5.25253	5.29078	5.60277	5.28798	5.59265	5.51387	5.45174	5.49875	5.3688	5.32464	5.22998	5.25837	5.13324	5.23946	5.77016	5.51957	5.55156	5.57578	5.40442	5.15221	5.57343	5.81551	5.42746	5.56019
ENSG00000066468	FGFR2	protein_coding	3.41552	2.65201	3.35553	5.99016	4.0793	1.43064	3.42517	3.28849	3.16158	2.66694	2.89548	2.15011	1.98	3.98296	2.80805	2.08601	3.42614	1.81712	1.65631	3.01546	2.543	4.00767	4.71426	2.29617	5.7692	1.79329	2.94443	1.49274	3.24418	2.11298	2.08663	6.15918	5.48719	5.43286	2.54354
ENSG00000066557	LRRC40	protein_coding	4.35643	3.22648	4.08191	4.26612	4.19848	4.12113	4.15568	3.91279	4.04098	4.21579	3.54829	4.13856	4.95322	4.54874	3.91328	4.15876	3.96933	5.0684	3.75292	4.35271	4.24194	4.10898	3.78467	4.82843	4.37781	4.41156	3.74653	4.24936	4.11659	4.1874	3.95924	3.37093	3.49078	1.91321	3.84583
ENSG00000066583	ISOC1	protein_coding	4.87586	4.94316	4.04999	4.60808	4.29716	4.03449	4.64363	4.72158	5.32927	4.63243	4.57548	5.89648	5.33574	4.96068	4.8936	5.32231	3.94861	7.01928	4.95382	4.73521	6.26645	4.10045	4.03461	5.73155	4.32367	4.73933	4.99594	5.22579	5.40365	5.74742	5.61746	4.02936	4.85931	3.78927	4.92791
ENSG00000066629	EML1	protein_coding	4.93102	5.80588	5.27052	3.95174	4.70778	4.63697	5.46979	4.10504	5.38379	5.66228	5.98409	5.47066	5.52232	5.27679	5.22735	5.29438	4.79482	4.19342	5.42647	4.63284	5.17581	3.90851	4.59454	5.0102	3.97913	5.70617	5.86992	4.87699	5.52462	5.64091	5.35271	4.06526	3.44023	3.61041	6.0508
ENSG00000066651	TRMT11	protein_coding	3.82151	3.06143	3.37944	2.94342	3.38641	3.35417	4.06913	3.28093	3.49818	3.66025	3.49771	3.54887	3.79844	3.93356	3.51784	3.30319	3.40457	4.09934	3.16222	3.44811	3.40807	3.16797	3.37682	3.91989	2.82042	3.20805	3.82934	3.64662	3.45062	3.9563	3.37429	3.5142	3.46292	3.29686	4.21285
ENSG00000066654	THUMPD1	protein_coding	5.81167	4.9649	5.46462	4.89748	5.94159	5.80582	5.91946	5.64753	5.13339	5.75207	5.61508	5.66207	6.08469	5.58155	5.66453	5.76196	5.98138	6.86757	5.74299	5.60163	5.97232	5.76544	5.43934	6.10989	5.78189	5.79213	5.66028	5.79687	5.83719	5.82852	5.63713	5.15725	4.76889	5.17666	5.85368
ENSG00000066697	MSANTD3	protein_coding	3.9338	4.13833	3.22086	2.9978	3.51664	3.49709	2.84823	3.08628	3.81861	3.85961	3.4285	3.55742	5.06425	4.89854	2.93217	3.34916	3.51339	4.09934	3.19305	4.36127	3.62932	3.50831	3.93838	4.91709	3.94234	3.71263	3.22962	3.0688	3.11421	4.17655	2.76468	3.35893	3.38487	3.44516	3.15043
ENSG00000066735	KIF26A	protein_coding	4.12083	4.90056	3.91474	2.65277	2.74711	3.24651	4.02924	3.69947	4.20697	4.32414	4.7423	4.70567	4.13542	4.39666	3.942	4.74473	3.4725	3.32599	4.92918	3.037	4.27586	2.59381	2.11701	3.42913	1.33691	4.1028	3.71075	4.18057	4.09952	3.05062	3.70434	1.32795	0.995871	0.795189	3.95875
ENSG00000066739	ATG2B	protein_coding	5.4201	5.18304	5.16328	4.92814	5.46935	5.10494	5.45079	5.21703	5.10001	5.49709	6.23922	5.7203	5.57952	5.84464	5.49374	5.61164	5.13591	5.82099	5.31778	5.46926	5.47952	5.01301	5.36896	5.52426	3.75504	5.66735	5.56035	5.68449	5.62859	5.10863	5.53145	4.88747	4.81481	4.31608	5.59148
ENSG00000066777	ARFGEF1	protein_coding	5.86672	5.34789	5.91188	6.47816	5.9422	5.86726	5.85853	5.7688	5.11441	5.769	5.61804	5.95747	6.471	6.11808	5.66519	5.77885	5.35871	6.60288	5.69841	5.88307	6.01311	5.88079	5.41875	6.33438	7.14108	5.83582	5.72659	6.00793	5.897	5.72339	5.85064	6.54048	5.82703	4.90274	6.04308
ENSG00000066827	ZFAT	protein_coding	3.03704	3.55259	2.56831	3.0286	2.77477	2.66601	2.49684	2.81479	2.84202	2.88283	3.15416	3.14052	3.69558	2.68028	2.53396	2.81278	2.6873	3.79895	2.7174	2.56737	3.27414	2.56929	2.71719	2.82964	3.86583	2.44848	3.82344	2.86304	3.02401	3.39294	2.66825	4.01719	3.8112	3.54018	3.50545
ENSG00000066855	MTFR1	protein_coding	4.14365	3.75328	3.86762	4.2058	4.11436	3.74638	4.16798	3.63564	3.76484	4.15983	3.71257	3.97916	4.40841	4.13053	4.16454	4.07643	3.69499	5.08658	4.21868	3.70515	4.83681	3.57758	3.5011	4.27636	4.5999	4.23698	3.57454	4.10282	4.53827	3.88475	4.06149	4.01872	2.92329	3.04966	4.33074
ENSG00000066923	STAG3	protein_coding	1.95358	2.15586	1.7262	2.55339	1.50606	2.67749	0.745456	2.07012	0.964467	0.0189123	1.33793	1.16909	0.437409	0.817089	0.871757	0.700345	2.85576	1.79201	1.85664	2.11973	1.15533	2.2055	2.20429	1.19331	0.184551	1.22645	1.25064	2.03336	1.39192	0.326031	1.97282	1.82339	2.53088	2.27215	1.58445
ENSG00000066926	FECH	protein_coding	4.6151	5.0402	3.91474	4.50233	4.25849	5.24463	5.15577	4.60521	4.49442	4.94211	4.47118	4.90462	4.05461	4.77499	4.73725	4.69752	4.60734	5.12227	4.62129	4.49179	4.80126	4.93717	4.53609	4.35377	4.49131	5.09668	4.50983	4.67507	5.04066	4.71752	4.91509	4.23643	4.36433	3.86783	5.02519
ENSG00000066933	MYO9A	protein_coding	6.13792	5.47578	5.74478	5.55285	5.57147	5.64918	6.01448	5.54148	5.21807	6.25372	6.17477	5.95747	6.22273	5.95107	6.11274	6.00175	5.69896	5.98644	5.83242	5.38148	5.94767	5.45163	4.52535	5.77482	4.29478	6.17946	6.14884	6.1705	5.95103	5.26537	6.18394	4.17066	4.56641	4.56038	5.87792
ENSG00000067057	PFKP	protein_coding	4.95218	5.61746	6.05545	6.94722	5.09116	4.56616	4.06913	4.70754	5.21585	4.50796	4.93404	5.16439	7.28707	5.58368	4.38653	4.63766	5.23703	6.30533	4.58854	6.10897	4.60905	4.52704	6.8938	6.33001	5.66661	5.08445	4.77326	4.22426	4.36745	6.30595	4.09896	6.18048	7.22463	5.79056	5.29201
ENSG00000067064	IDI1	protein_coding	6.89023	5.04361	6.0185	5.53381	5.59803	4.75817	5.08229	4.68191	6.32718	5.87621	5.46598	6.80764	7.2074	6.79496	5.06308	5.82269	5.19241	7.7956	5.47476	5.88975	6.68312	5.71672	5.11114	7.16801	4.99195	6.04144	5.14137	6.34073	5.69261	6.32019	5.58085	4.94079	4.37633	4.27342	5.22218
ENSG00000067066	SP100	protein_coding	6.63332	6.2469	6.42206	5.78641	6.0412	6.26602	6.01038	6.03484	6.39364	6.15627	6.3046	6.33704	6.62958	6.60821	5.78528	5.95791	6.33276	6.95923	6.10901	6.12477	6.09051	6.42484	5.52274	6.80941	6.42609	6.22973	6.11985	6.1705	6.49227	6.18932	5.92416	5.1517	6.65245	5.6317	6.07314
ENSG00000067082	KLF6	protein_coding	11.1142	10.6837	10.1325	7.96548	10.2711	9.10568	9.86893	8.1555	9.52374	11.1694	10.7272	9.88691	11.1389	11.0519	9.47071	10.2124	9.65523	10.998	9.18717	9.25012	10.3574	9.535	7.20955	10.5692	8.44015	10.0197	8.60207	10.3652	10.0389	9.76486	9.26675	6.16815	8.62958	7.74391	8.0659
ENSG00000067113	PPAP2A	protein_coding	7.8501	7.35012	7.4959	5.37424	6.80496	6.29799	6.96848	6.55122	8.81295	7.39232	7.36553	7.33403	8.12538	7.56029	7.11722	7.90069	7.09254	8.30397	7.55187	7.06839	7.56669	6.18463	5.35776	7.52503	3.77908	7.48472	7.30308	7.75446	7.16484	7.89786	6.76502	4.14712	4.3385	5.96897	7.33753
ENSG00000067141	NEO1	protein_coding	7.19786	6.68476	5.82459	6.60948	6.34603	5.33168	7.22046	6.11097	5.77986	6.81064	7.00622	5.85203	6.5871	7.08843	6.711	5.7483	5.94747	6.74865	5.12915	6.04397	5.74466	5.5784	6.22015	6.03262	6.94084	6.11901	6.63887	6.38614	6.38665	5.97037	5.96397	5.87512	6.94284	6.08108	6.82308
ENSG00000067167	TRAM1	protein_coding	8.30588	7.41308	7.91048	7.98692	8.19657	8.13553	8.47964	8.06091	6.91625	8.2492	7.13877	7.67463	8.1647	8.75358	7.96616	7.83516	8.03423	8.05501	7.94804	8.02038	7.90636	8.49356	6.77345	7.84165	8.09198	8.4853	6.8278	7.98712	8.28648	7.26884	7.78067	7.43316	6.4124	6.52624	6.93194
ENSG00000067177	PHKA1	protein_coding	3.62871	3.64972	3.738	3.15762	3.02564	2.74453	3.60602	2.5063	4.14752	3.70004	3.83733	3.52729	3.70807	3.83658	3.18229	3.35818	2.34166	3.8115	3.23173	3.13513	3.6946	3.45242	3.51358	4.095	2.82042	3.23042	3.69361	4.10007	3.83649	3.96893	3.6346	3.10379	3.05231	2.50301	4.11197
ENSG00000067182	TNFRSF1A	protein_coding	7.6907	8.129	7.76454	6.46736	7.45643	7.1785	7.48713	6.80312	8.34126	8.08124	7.43081	7.75854	8.81723	8.26026	7.42877	7.70332	7.15816	9.3055	7.72533	7.82142	8.13585	6.81995	6.61634	8.77276	7.49278	7.55707	7.52183	7.33875	7.50529	8.95824	6.89959	6.94876	6.99558	7.61556	8.16159
ENSG00000067191	CACNB1	protein_coding	1.58804	2.81246	2.37573	1.50657	2.40161	2.40104	1.56485	1.97015	2.25142	1.05217	2.08445	1.48793	1.40575	1.40537	1.82011	1.8248	3.21926	0.601909	1.31571	1.85455	0.690294	1.42169	1.79792	1.30444	1.80337	1.74439	2.09582	1.17414	1.51476	2.0189	1.75223	2.92645	2.47618	3.64056	2.17742
ENSG00000067208	EVI5	protein_coding	5.747	5.06053	5.12726	4.81154	5.32806	5.23008	5.58894	5.01975	4.23361	5.9399	4.96695	5.26823	6.08589	5.69952	5.5785	5.54703	4.90649	5.4336	5.29259	5.40755	5.47687	5.05004	4.60769	5.88621	4.33791	5.85322	4.68816	5.69183	5.58895	4.97877	5.56844	3.60847	2.9755	3.46214	4.56282
ENSG00000067221	STOML1	protein_coding	2.57386	4.05296	3.00219	1.99952	2.54346	3.3069	3.2511	2.89133	3.46859	2.75268	3.38044	3.37127	3.70184	2.73512	3.26505	3.2066	3.6807	4.95704	4.00451	3.29563	3.48916	2.34206	2.31538	3.42093	3.06003	3.26982	3.23259	3.4222	3.58986	3.97207	3.10636	2.0069	2.54158	4.14785	3.61529
ENSG00000067225	PKM	protein_coding	7.90873	9.50136	8.12455	10.1866	8.41448	8.87716	8.05117	8.02257	8.13039	7.95498	7.7327	7.79332	8.93646	8.66467	7.72703	7.82706	8.31009	8.13518	7.2381	8.6893	7.74457	8.20642	8.73615	8.12593	10.9724	8.4674	7.97677	7.4406	8.13148	8.48538	7.57465	9.07248	9.68808	10.62	8.36612
ENSG00000067248	DHX29	protein_coding	5.09369	5.07059	4.93362	5.19382	5.18899	4.98069	5.27316	4.89889	4.63425	5.34228	5.27737	5.24065	5.96232	5.33629	5.0721	5.28967	4.79648	6.01248	5.24505	5.21194	5.5251	4.87099	4.69247	5.72241	4.98033	5.25887	5.22207	5.32829	5.48008	5.45357	5.11611	4.6569	4.28539	4.57216	5.6761
ENSG00000067334	DNTTIP2	protein_coding	6.70268	5.44389	6.28586	5.38703	5.75628	5.25424	5.15206	4.87773	6.23242	6.31265	5.91529	6.24549	7.65357	6.82687	4.97923	5.90426	5.02151	7.62927	5.40876	6.07032	6.78727	5.47162	5.03743	7.61178	6.14833	5.62662	5.71229	5.86097	5.34069	7.06399	4.94695	5.35755	5.81991	5.44679	5.91224
ENSG00000067365	METTL22	protein_coding	2.7478	3.49897	2.81617	1.75833	2.6064	2.62509	2.75998	2.5063	3.00548	2.76022	3.25279	2.76603	3.04008	2.42784	2.82713	2.81278	2.9718	4.05782	2.86142	2.09941	3.13324	2.81854	2.99597	3.28751	2.3444	2.59357	3.13751	2.80327	3.0648	3.71887	2.96739	2.72421	2.47059	3.273	3.50891
ENSG00000067369	TP53BP1	protein_coding	4.92773	5.6834	4.51681	5.77737	4.94663	5.12604	5.10037	5.22494	4.48706	4.983	5.43355	5.05399	5.30524	5.43306	5.23272	5.04068	4.73384	4.57822	4.75568	4.95055	4.84094	4.77103	5.66658	4.96722	6.11979	5.42127	5.29992	4.92607	5.19789	4.53201	4.86811	5.89146	5.74147	5.23464	4.5711
ENSG00000067445	TRO	protein_coding	3.59184	4.88924	2.68162	3.16159	3.87464	3.64477	3.3451	3.82446	3.105	3.37089	3.99154	2.41748	2.69586	3.26349	3.6576	3.24114	4.28487	1.60286	1.8676	2.93743	1.9501	3.81252	4.946	2.88433	4.05494	4.01534	3.64314	3.20333	3.27926	2.8329	2.81358	5.41433	4.29648	5.02349	3.13263
ENSG00000067533	RRP15	protein_coding	4.65536	3.36915	4.86471	4.15286	4.70634	3.92316	4.17043	3.78755	4.53424	4.96515	3.93562	4.59382	6.73173	5.24475	4.29187	4.57132	4.26824	6.74946	4.53455	4.88377	5.1709	4.23127	3.86722	6.45723	4.30517	4.12684	4.08908	4.42266	4.61408	5.43206	4.03337	3.91268	4.46189	3.96337	4.60216
ENSG00000067560	RHOA	protein_coding	9.36665	9.27856	9.03636	8.90988	8.80087	9.28806	9.23224	8.61045	9.78199	9.47261	8.95741	9.19847	9.75107	9.44597	8.77214	9.28779	9.05387	9.81677	9.15503	8.92641	9.57172	8.89735	8.2958	9.53529	8.70608	9.374	8.72301	9.23384	9.14625	9.47644	9.03907	8.38119	7.96663	8.94135	9.14676
ENSG00000067596	DHX8	protein_coding	4.9228	5.52294	4.97212	4.43822	5.11625	4.96906	4.85315	4.87018	4.78591	5.0054	5.24227	5.12613	5.76427	5.12665	4.81814	4.75159	4.66292	5.88917	4.9134	4.89118	4.86949	4.95029	5.17833	5.69547	5.42898	5.09424	5.31611	5.09344	5.13704	5.50111	4.74113	5.24466	6.08781	4.83591	5.61971
ENSG00000067601	PMS2P4	pseudogene	0.785192	0.620687	0.483981	0.52381	0.356803	0.379798	0.548774	0.550396	0.57777	0.782548	0.426239	0.667435	0.980905	0.379179	0.472085	0.384358	0.669506	1.45075	0.440284	1.02519	1.01634	0.327012	0.471758	0.455392	-0.550669	0.209184	0.683387	0.995783	0.572696	0.642274	0.951196	-0.181603	0.6651	1.3085	0.265645
ENSG00000067606	PRKCZ	protein_coding	2.21296	2.39878	2.74434	3.94253	1.94642	1.69069	2.48116	1.99811	1.7592	2.37416	2.76253	1.39565	2.63175	2.54649	1.74186	1.43913	2.5288	1.79201	1.52402	1.60343	1.44274	2.17332	2.80611	1.87191	3.61179	1.2789	2.35227	1.73945	2.39978	1.87863	1.57917	3.20918	4.13104	4.89024	2.27802
ENSG00000067704	IARS2	protein_coding	6.92441	6.85253	6.63937	7.31028	6.45435	6.47783	7.02333	6.4906	6.83814	6.85449	6.67879	7.23863	6.95248	6.82552	6.95245	7.04225	6.15682	7.8019	7.04975	6.62451	7.54978	6.33268	6.1094	6.93167	6.71684	6.80335	6.91454	7.28484	7.33522	7.25439	7.24901	6.56837	7.38357	5.71995	7.36566
ENSG00000067715	SYT1	protein_coding	2.96198	1.43568	1.52654	-0.0812163	2.01297	0.771322	0.745456	1.07275	0.735168	2.52354	1.9498	1.55773	3.47219	1.46221	0.834534	2.45739	1.45383	0.350007	0.440284	0.57328	1.23273	1.72899	3.08647	1.13435	-1.32516	1.85216	2.4268	1.86168	0.944559	0.673488	0.661722	0.754902	0.00723606	2.00877	1.03288
ENSG00000067798	NAV3	protein_coding	4.51143	4.26638	3.60575	2.90599	4.2288	4.49007	4.39005	4.43325	3.368	4.2802	4.59065	3.77084	4.07885	4.39422	4.52293	4.14319	4.52175	3.16909	3.73208	4.05312	3.26802	4.0415	2.77535	4.00188	1.2363	4.72994	4.762	4.62991	4.0496	3.20279	3.73322	2.06125	2.48728	3.65909	3.12814
ENSG00000067829	IDH3G	protein_coding	4.62325	5.42179	4.29593	4.18055	4.21068	4.74731	4.64363	4.25548	5.6785	4.58435	4.95059	4.80409	4.39688	4.55746	4.55189	4.51798	4.85173	5.3714	4.50326	4.1625	5.02986	4.43842	4.00176	4.67659	5.90513	4.51356	4.97125	4.4049	4.80972	5.50328	4.572	4.6725	4.60517	6.002	5.77839
ENSG00000067836	ROGDI	protein_coding	3.26231	4.94863	3.1485	2.85289	3.10625	3.57282	3.10009	3.08193	4.19798	3.20384	3.62395	3.00341	2.72072	3.39095	3.24391	3.18648	3.68428	2.04672	2.6991	2.72164	3.07838	2.8392	3.75607	2.63072	4.75493	3.38595	3.73819	3.08004	3.02401	3.20279	3.09156	4.17066	3.60483	4.65757	2.98666
ENSG00000067840	PDZD4	protein_coding	3.77475	3.61807	3.66531	1.68289	2.6726	2.86991	2.7271	2.79899	3.53433	3.0022	4.05195	2.99714	3.37372	2.59812	2.96699	2.96817	3.19935	2.36879	2.62353	2.30867	2.13617	2.68224	1.44085	2.27812	-0.0494523	2.43314	3.68929	2.35345	2.38376	3.7558	1.97282	1.75908	1.36454	2.40103	4.0705
ENSG00000067900	ROCK1	protein_coding	7.46805	6.37554	7.1877	6.41044	7.28282	6.9119	6.76934	6.64263	5.99492	7.18995	6.78511	7.16751	7.77056	7.31524	6.99207	7.1298	6.78043	7.54255	7.135	7.16448	7.25357	7.02209	6.25401	7.69679	6.10797	7.18633	6.954	7.54388	6.92114	6.74755	6.92033	5.43678	5.34253	4.65203	7.01506
ENSG00000067955	CBFB	protein_coding	6.22007	5.39935	6.07633	5.48863	6.438	6.12377	5.59806	5.86557	4.63758	6.12226	4.68552	5.66405	7.17346	6.81191	5.47345	5.28613	5.94074	7.14419	5.58843	6.35764	5.3538	6.06475	5.34995	6.44717	6.31176	6.05152	4.54969	5.7711	5.59766	6.23449	5.24985	4.85621	4.78473	4.9274	5.14547
ENSG00000067992	PDK3	protein_coding	2.54843	3.12716	3.28977	2.35935	2.96929	3.54174	2.58755	2.56355	3.04612	2.95694	2.90035	2.99085	3.00001	3.37624	2.52814	2.83879	2.5288	2.41885	2.39263	2.51461	2.12268	2.5816	4.11257	2.39992	2.02061	3.14823	2.54147	2.84339	2.60728	3.08585	2.05647	2.13067	0.759757	2.39219	3.77587
ENSG00000068001	HYAL2	protein_coding	7.21984	6.7378	7.74205	5.74792	6.25074	5.106	5.43561	4.80704	7.88823	6.9043	7.02616	5.85463	8.16073	7.87767	5.60913	6.07128	6.8924	7.92501	7.85042	6.75979	5.98263	5.94416	6.15043	7.29821	5.73273	6.8916	7.08039	6.77206	6.51544	7.43429	5.41346	5.47175	4.92819	5.72611	6.94252
ENSG00000068024	HDAC4	protein_coding	4.87415	5.05379	4.68132	3.76837	4.37514	4.75411	4.8668	4.75883	4.94747	5.08268	5.27079	5.15597	6.16502	4.89166	5.16405	5.16026	5.01155	6.21966	4.94479	5.01437	5.25524	4.81863	4.09191	5.77079	3.22226	5.14575	5.33421	5.40178	4.70719	5.15636	5.03207	3.72715	3.85474	3.17855	4.98483
ENSG00000068028	RASSF1	protein_coding	5.42709	4.88924	4.50237	4.13275	4.20459	5.0716	4.20427	4.52899	5.95012	4.45081	5.09371	4.93936	5.62633	4.98675	4.29529	5.01238	5.3258	5.162	5.0675	4.64166	5.0496	4.50135	3.93374	5.7513	3.31563	4.95479	4.90015	4.70441	4.58809	5.18236	4.3661	3.89283	3.40552	4.97255	4.79558
ENSG00000068078	FGFR3	protein_coding	2.08909	3.62718	2.01782	2.20611	1.16506	0.636642	2.26915	0.599893	3.0561	3.40499	3.23746	2.40807	2.45038	2.23472	2.3351	2.61623	1.11432	1.41831	2.13585	2.34366	1.39864	0.0362751	0.707284	2.63781	2.69335	0.668263	2.06947	2.53588	1.84251	1.53212	1.75223	5.37136	1.49134	0.431265	1.84713
ENSG00000068079	IFI35	protein_coding	4.42557	5.31301	4.85764	4.40507	3.84884	4.6603	4.62412	4.34347	6.01169	4.5302	4.79693	5.35166	4.62804	5.42713	4.30042	4.38306	4.65928	5.52404	4.57857	4.50923	4.83681	4.30367	4.14902	4.67142	5.59562	4.48036	4.558	3.99713	5.59418	4.82046	4.36199	3.72154	5.81771	5.41007	4.59567
ENSG00000068097	HEATR6	protein_coding	2.70241	3.61349	2.57523	3.07992	3.50347	4.06322	3.37087	3.49881	2.3682	3.10654	3.68174	3.32698	3.08864	2.52886	3.49118	3.3125	3.43468	3.79895	3.05603	3.42787	2.85999	3.71248	4.1943	3.0316	4.06719	3.36184	3.80957	3.31216	3.64133	3.33555	3.56845	4.54162	4.30592	3.7859	3.93069
ENSG00000068120	COASY	protein_coding	4.49821	5.82185	4.60395	4.86372	4.67144	4.846	4.98831	4.63371	5.18206	4.91532	4.98543	4.92622	4.80123	4.7371	4.9653	4.82011	4.7731	5.64815	5.15286	4.53406	5.11919	4.30553	4.46076	4.89654	5.93753	4.58473	5.00466	4.75786	5.31451	5.26024	4.92068	5.24857	6.23058	5.67605	5.68223
ENSG00000068137	PLEKHH3	protein_coding	3.61244	5.70293	3.70053	3.67967	3.82258	3.92316	4.29455	4.65289	4.19798	3.84903	4.3463	4.96527	2.50866	3.51255	5.18915	4.9674	4.44984	3.48326	4.02179	2.92594	4.4507	2.52534	3.89372	1.85983	2.60868	4.41156	3.87188	3.08562	3.90267	3.52715	3.77395	4.0785	4.78923	4.89338	3.82103
ENSG00000068305	MEF2A	protein_coding	6.74154	5.97697	6.60176	5.7373	6.75341	6.27786	6.23395	6.01274	6.13336	6.63038	6.40066	6.70034	7.48963	6.73615	6.30231	6.57495	6.4798	6.75353	6.67789	6.48407	6.51839	6.39985	5.55705	6.82736	5.3459	6.86433	6.50027	6.46967	6.49274	6.43279	6.17403	6.16195	5.6979	5.50018	6.41256
ENSG00000068308	OTUD5	protein_coding	5.47512	6.00871	6.32947	5.09022	5.30642	5.15405	5.19717	5.28197	6.13218	5.23939	5.67393	5.45245	5.52409	5.27679	5.33621	5.39643	5.64478	5.97533	5.26902	5.08069	5.81345	5.05777	5.56307	5.39733	5.51738	5.32167	5.58031	5.38715	5.25407	5.82592	5.2686	5.56822	5.16712	6.18127	5.91354
ENSG00000068323	TFE3	protein_coding	6.6848	6.93055	5.94096	4.97747	5.70399	5.7471	6.08039	5.72625	7.60004	6.6437	6.8758	7.0426	6.759	6.43918	6.09416	6.89931	5.74432	7.36614	6.80163	5.89639	7.3212	5.35361	5.33772	7.19471	5.48851	6.11721	6.87086	6.77162	6.59722	7.28377	6.35529	5.6149	5.16453	6.17999	7.0187
ENSG00000068354	TBC1D25	protein_coding	4.36374	4.64185	4.82464	3.59401	3.94694	3.72994	4.14825	3.79554	4.53067	4.224	4.62198	4.38407	4.73565	4.40151	4.05351	4.29888	3.96048	4.63932	3.96678	4.23883	4.46948	3.81252	3.74288	4.77797	4.13862	3.97617	4.45364	4.26914	3.96325	4.61474	4.14268	3.58393	3.51541	4.35751	4.81245
ENSG00000068366	ACSL4	protein_coding	7.34482	6.36331	6.71296	6.89385	7.02221	6.68861	7.48664	6.23119	6.26614	7.77926	6.20021	8.23719	9.51738	9.41968	7.31956	6.61219	5.77659	10.464	6.61016	7.64461	7.88129	6.71591	6.35239	9.51021	6.16268	6.9194	7.33453	6.90712	7.53144	8.37089	7.13427	5.55197	4.74015	5.10954	7.35706
ENSG00000068383	INPP5A	protein_coding	5.19414	5.03678	5.1448	4.53641	5.05213	4.76356	4.92158	4.62028	5.69616	5.1402	5.31438	5.30422	5.82143	5.0805	5.01294	5.51007	5.63462	5.681	5.41438	5.03057	5.65026	4.353	4.38127	5.34737	4.96076	5.10518	5.4587	5.20798	4.88425	5.75474	4.92486	4.83903	4.25646	4.17386	5.9291
ENSG00000068394	GPKOW	protein_coding	3.82504	4.16361	4.69727	3.97678	3.63306	3.61223	3.50879	3.56574	4.82438	3.65216	4.04536	3.88726	4.03491	3.71711	3.8068	3.91463	3.53341	4.54103	3.82216	3.68823	4.12839	3.23966	3.71883	3.99913	4.33791	3.55498	4.04919	3.8275	4.01879	4.25086	3.61058	3.76767	3.99366	4.49175	4.44694
ENSG00000068400	GRIPAP1	protein_coding	5.16515	5.3725	5.69006	4.82162	4.50469	4.74459	4.33439	4.82926	5.14045	4.85668	4.81254	5.16997	5.02735	5.23255	4.64486	5.03225	4.84534	5.50679	5.03384	4.80278	5.47687	4.54759	4.79187	4.95875	5.45252	4.77628	4.86037	5.04122	4.79768	5.00815	4.91088	5.04486	4.59108	5.3406	4.87535
ENSG00000068438	FTSJ1	protein_coding	4.37824	4.86825	4.89544	4.12666	4.13158	4.12323	3.83618	3.83741	4.8156	4.20753	4.3711	3.96959	5.06425	4.382	3.95072	4.07095	4.37194	5.07622	4.15076	3.99653	4.27586	3.9613	4.2808	4.90244	4.93156	4.12684	4.58266	3.89904	4.27705	4.72499	3.78012	5.1942	4.22196	5.18946	4.93177
ENSG00000068489	PRR11	protein_coding	1.66893	2.93498	1.77508	3.63175	1.93665	1.76791	1.17405	1.91255	-0.536091	1.14734	0.740936	1.70343	0.980905	2.758	1.21367	1.33332	1.23658	0.417224	1.49604	1.63202	0.761664	2.24475	3.3734	0.718822	5.26734	1.88637	0.215502	1.78136	1.08996	-0.992639	1.59325	4.49302	3.98585	0.531207	-0.28447
ENSG00000068615	REEP1	protein_coding	4.16053	3.26787	4.12026	2.44013	2.25218	2.23225	5.01851	2.6005	4.238	5.26083	5.33253	3.44219	3.91075	4.52892	4.7498	3.70079	2.72956	2.67375	2.95688	2.29979	2.66901	1.86618	2.78568	3.33191	-0.3289	3.29974	5.29779	2.86304	4.23747	4.30169	4.33921	2.30597	0.542649	0.167011	5.38329
ENSG00000068650	ATP11A	protein_coding	6.06805	6.05505	5.97274	5.2035	5.11625	5.62121	6.1378	5.08421	4.96877	6.66798	6.25739	6.03141	7.02415	6.77687	5.75633	5.45647	5.16444	6.20428	5.78984	5.63555	5.41319	5.41855	4.21928	6.63033	4.40124	6.00623	6.20476	6.23663	6.32293	5.36553	5.97476	5.862	5.58351	3.37516	5.55184
ENSG00000068654	POLR1A	protein_coding	4.76247	5.13112	5.30214	5.75122	5.24346	4.91431	5.28337	4.68764	5.06583	4.98622	5.19938	4.52361	7.08347	5.30814	5.16311	4.96297	4.66836	7.14791	5.38512	5.21902	5.05849	4.67517	5.34472	6.04201	5.96202	4.96015	5.44275	4.78042	5.42142	5.89376	4.83592	6.25718	6.11984	5.02349	5.54176
ENSG00000068697	LAPTM4A	protein_coding	9.08327	8.6524	8.77368	8.18485	8.93725	8.94174	9.05317	8.53124	9.0793	9.09028	8.60126	8.95527	9.1695	9.22822	8.84939	9.22445	8.93587	9.08843	8.62635	8.7832	9.16088	8.36355	8.33424	8.85826	8.21921	9.05315	8.33194	9.10286	8.91147	8.72815	8.61293	7.95082	7.89545	8.37508	8.39394
ENSG00000068724	TTC7A	protein_coding	4.99674	6.1146	4.99681	4.81533	4.99565	5.569	5.19477	4.72437	5.07076	5.71953	5.40123	4.95723	5.26142	5.08804	4.8581	5.31769	5.16572	4.33919	4.66749	4.75484	4.8076	4.83286	4.62073	5.09381	4.89077	5.25014	5.07918	4.73672	4.94422	4.63866	5.05895	5.54139	4.46751	5.12027	4.95602
ENSG00000068745	IP6K2	protein_coding	5.47961	5.58741	5.10592	5.08395	5.41061	4.80994	4.95604	4.91609	6.09272	5.46627	5.89832	4.82016	5.10967	4.9948	4.90149	5.01666	5.6169	5.4275	4.93831	5.19527	4.91716	5.44659	5.61177	5.06121	4.14326	4.90561	5.65751	5.60407	5.15249	5.33779	5.13428	5.57031	5.3077	6.49615	5.85978
ENSG00000068781	STON1-GTF2A1L	protein_coding	-3.41948	1.92401	1.76301	-1.71299	1.09656	0.81356	1.74643	0.524996	0.684587	-0.453228	3.61804	0.698669	1.06098	0.631305	0.69613	0.0698226	0.272133	-0.0430201	0.440284	2.12979	2.543	-0.635138	-0.420078	1.70638	-1.13345	2.64775	-2.68521	3.17217	2.36755	1.251	1.67493	1.14991	1.26477	-4.08843	2.03135
ENSG00000068784	SRBD1	protein_coding	3.96617	3.86538	3.81307	3.62889	4.0388	4.16257	4.3689	3.71078	3.78299	4.20477	3.9685	4.28466	3.83875	4.34973	3.9851	4.11153	3.74735	4.61448	4.07477	3.75148	4.30899	3.66698	3.70801	3.8143	4.31136	4.25018	4.06595	4.38238	4.56872	4.19549	4.08906	3.89948	3.84398	3.70261	4.17421
ENSG00000068793	CYFIP1	protein_coding	6.75642	7.47435	6.68964	6.83003	6.64366	7.80566	7.2077	6.57771	6.77381	7.45237	7.05869	7.22964	7.5572	7.61327	6.83515	7.07954	6.7842	7.43009	7.05336	6.68118	7.0548	7.11821	6.81564	7.2833	6.41222	7.48774	7.06422	6.9418	7.09826	6.97401	6.94592	6.71896	6.67994	6.17613	7.03287
ENSG00000068796	KIF2A	protein_coding	4.59454	4.4802	4.52577	4.75082	5.09336	4.71286	4.64539	4.95703	3.38394	4.38399	4.02541	4.80229	5.03728	4.64804	4.44789	4.28002	4.15393	5.1742	4.49091	4.89855	4.36736	4.58935	4.83478	4.96581	4.46931	4.56375	4.11508	4.54933	4.55447	4.52132	4.65653	5.06125	4.73899	3.93019	4.36164
ENSG00000068831	RASGRP2	protein_coding	5.15956	3.9978	3.96037	2.07734	3.4734	3.32891	3.23716	4.48357	4.573	3.70004	3.93324	4.19441	3.1631	3.57401	3.50605	3.62806	5.01867	3.93131	4.1075	3.98826	3.28629	3.93275	1.9708	3.74375	0.476851	3.35372	3.86807	3.68392	3.20822	4.15736	3.46892	0.516366	2.93551	3.47055	4.20435
ENSG00000068878	PSME4	protein_coding	5.46042	5.16594	5.92615	6.56777	6.65114	5.8915	5.25943	5.31939	5.35779	5.83302	5.62837	5.8821	7.39481	6.48161	5.28453	5.48455	5.58944	7.41937	5.56169	6.49772	6.09397	6.38543	5.9521	7.63965	6.00279	5.7525	5.8589	6.08594	5.58982	6.53405	5.49256	6.51825	6.20473	5.30809	6.31973
ENSG00000068885	IFT80	protein_coding	5.20231	4.53208	4.36542	4.53641	5.21244	4.74731	5.06002	4.88897	3.97411	5.03058	4.75447	4.32525	4.47203	4.92237	4.64351	4.51193	4.89415	4.03124	4.31991	4.47018	4.46146	4.72181	4.67729	4.26495	5.24594	4.89164	4.52687	4.7296	4.92635	4.07793	4.60537	4.84335	5.18001	4.33925	4.26076
ENSG00000068903	SIRT2	protein_coding	5.47625	6.40697	4.84051	4.73356	4.98976	5.41291	5.41098	5.15008	6.39855	5.67531	5.95684	5.74576	5.50811	5.30685	5.32703	5.46276	5.45526	6.0487	5.58013	5.08973	5.93711	5.07421	4.84962	5.61959	5.48029	5.43675	5.86227	5.62436	5.54187	6.28463	5.7124	4.77362	5.13657	5.68512	5.83247
ENSG00000068912	ERLEC1	protein_coding	6.00401	5.80387	6.07876	5.67817	6.36663	6.23479	5.92454	6.1131	5.96873	6.06552	6.02653	5.94124	6.02355	6.1559	5.90513	6.21601	6.30508	6.14231	6.02461	6.09492	6.00761	6.00428	5.72812	5.70816	6.02495	6.57816	5.88038	6.12376	6.09149	6.06683	5.85502	5.97445	5.53079	6.01429	6.16959
ENSG00000068971	PPP2R5B	protein_coding	4.31932	5.22418	3.75333	3.21613	4.00649	3.63007	3.70726	3.40446	5.43823	4.20477	4.57548	4.39126	4.19874	4.6129	3.92882	4.54391	3.60326	3.9654	4.78921	3.11502	4.50631	2.71615	3.52287	4.08206	2.48989	4.08572	4.02369	4.1138	4.23076	4.44424	3.90385	3.17673	2.74039	4.02752	4.28312
ENSG00000068976	PYGM	protein_coding	4.2315	4.62147	3.01242	1.46856	1.94642	2.74997	3.79235	3.63564	4.12873	3.82044	4.17979	4.34018	3.9322	3.60799	4.04335	4.04605	3.59185	4.91986	3.46251	3.037	4.1879	2.41268	0.392889	4.36877	-1.80761	3.56557	4.5473	3.80736	4.59158	4.65439	4.01258	0.143526	1.34023	1.08556	5.99647
ENSG00000069011	PITX1	protein_coding	-1.07425	-0.128243	0.701905	0.54831	-1.15611	-2.08151	-0.130637	-0.148471	-0.034473	-0.948098	-1.68625	-2.10416	-2.54434	1.00735	0.925849	-1.82361	-4.08843	-0.875415	-0.265149	0.889695	-1.5345	-0.282875	1.4011	-1.72287	0.184551	-0.254274	-0.199218	-1.96803	-1.63862	-1.20329	-0.338095	1.74439	-1.0973	0.898609	-1.85427
ENSG00000069020	MAST4	protein_coding	6.90241	6.13711	5.98837	4.35907	5.6572	5.04415	6.69393	5.55252	6.01553	6.85096	6.64976	6.91335	7.27977	7.23596	6.37905	6.61313	5.33038	7.76003	6.21794	5.81924	7.19757	4.97033	4.47519	7.12229	4.72739	5.74475	6.61088	6.91106	6.60285	6.30906	6.59097	3.50334	3.7754	4.12404	6.36332
ENSG00000069122	GPR116	protein_coding	8.28758	7.33976	7.94126	5.9407	7.05304	6.1979	7.14562	6.61806	8.24936	7.6178	8.08713	7.43021	8.48101	8.16182	7.59901	7.91642	6.82984	8.84488	8.31692	7.35176	7.70778	6.14265	5.26945	8.00121	3.89912	7.42949	7.32099	8.27619	7.27784	7.7444	7.12703	3.9722	4.65897	4.57412	7.65726
ENSG00000069188	SDK2	protein_coding	2.04128	2.58808	1.43824	2.65277	1.78167	-0.0797903	0.745456	1.99811	1.16227	1.63169	2.23102	0.788509	2.11743	0.845854	1.93886	0.671684	1.45383	0.481449	1.74219	1.74102	-0.0604759	1.06619	2.20429	1.97631	3.15954	1.74439	1.67433	2.14456	1.20389	1.16576	1.28181	3.51852	0.00723606	2.36536	-0.147659
ENSG00000069248	NUP133	protein_coding	5.16375	5.21363	5.38419	5.56116	5.43941	5.32439	5.55749	5.28953	5.27901	5.39413	5.49126	5.54235	5.74773	5.31844	5.42497	5.58691	5.10012	6.12608	5.41157	5.0386	5.68854	5.19334	5.5495	5.45869	6.14718	5.28154	5.5383	5.65849	5.62944	5.78274	5.6209	5.46897	6.29877	5.22348	5.96223
ENSG00000069275	NUCKS1	protein_coding	8.87953	8.23734	8.7892	9.00256	8.90952	8.6007	8.78641	8.60051	7.73588	8.7974	7.921	8.82311	8.95557	8.71378	8.72214	8.74219	8.68684	8.93616	8.50744	8.67435	8.93372	8.68985	8.90308	8.76771	8.98485	9.01348	8.0881	8.91652	8.93117	7.99487	8.64728	8.3008	8.4267	7.69896	8.2871
ENSG00000069329	VPS35	protein_coding	6.44919	6.43839	6.47804	6.41253	6.62782	6.94967	6.72465	6.42173	6.43916	6.60336	6.47528	6.82897	6.90378	6.85544	6.52565	6.57736	6.24565	6.84639	6.63723	6.30424	6.73392	6.45736	6.60034	6.78766	7.0804	6.83252	6.65474	6.71374	6.77479	6.94872	6.78624	6.39141	6.53021	6.32744	6.58201
ENSG00000069345	DNAJA2	protein_coding	6.47585	5.97608	6.21066	5.28412	6.14819	5.92319	5.85777	5.74631	6.36782	6.36741	5.81426	6.47816	7.46868	6.61658	6.12146	6.28149	5.90814	7.65038	6.24656	6.30535	6.89436	5.89258	5.49704	7.26967	6.77964	6.16734	6.11905	6.44	6.27323	7.12595	6.24539	5.33873	5.75187	5.73662	6.55637
ENSG00000069399	BCL3	protein_coding	6.27796	6.41028	6.21455	3.68244	5.06002	4.23817	4.75708	4.21832	8.05275	6.52246	5.3926	7.4363	6.92933	7.64328	4.35237	6.99748	4.36971	8.28131	4.09123	5.58436	7.48733	4.19766	3.73224	6.94137	5.33682	5.77321	4.67402	5.21437	4.86706	7.63543	2.99415	5.36597	5.38621	5.17151	6.05612
ENSG00000069424	KCNAB2	protein_coding	4.32182	5.68231	4.10361	4.56069	4.43184	6.74187	4.48356	4.96767	4.6175	4.81562	4.30644	4.88439	4.34185	5.55892	3.91551	4.04884	5.41267	3.94845	4.18621	4.65216	3.43561	5.9116	4.44781	4.58966	4.59483	5.54777	3.88705	4.48104	4.05467	4.64655	4.38645	4.2508	3.70339	4.45192	4.15229
ENSG00000069431	ABCC9	protein_coding	6.88474	6.23949	6.93322	5.33253	6.94395	6.53851	7.31004	6.78585	6.2247	6.76119	6.49193	6.90919	6.7931	7.29028	6.92449	6.75222	6.92383	7.41424	7.02427	7.13294	7.05658	6.59356	6.08765	6.40258	4.25676	7.17051	6.31154	7.44957	6.91906	6.79045	6.77123	4.21661	5.59382	5.04337	6.2697
ENSG00000069482	GAL	protein_coding	-2.34011	-0.256507	0.117728	-1.83443	-1.90644	-0.159257	-1.23426	-2.23696	-0.420844	-1.15966	-3.1953	1.2765	2.96922	0.928859	-0.694133	0.419259	-2.69415	1.63145	-1.16667	-0.520094	0.494702	-2.639	-1.40167	0.172479	1.51925	-2.10759	-1.68877	-1.14426	-0.455392	1.14364	-1.00531	-0.528797	-1.0973	0.563039	-0.104794
ENSG00000069493	CLEC2D	protein_coding	3.42486	1.08498	2.39931	2.05187	2.73025	3.16729	1.88402	3.85025	2.38414	1.94151	2.51794	2.26932	0.896125	2.10984	1.87614	1.48927	3.48489	2.80503	2.57085	3.08948	1.64502	3.8987	2.36443	2.55782	1.35302	2.4254	1.63893	2.01005	1.64149	2.15782	2.30759	1.14991	2.92737	2.1412	2.43878
ENSG00000069509	FUNDC1	protein_coding	2.8963	3.22047	2.89569	3.29426	2.6064	3.27324	3.44147	2.92571	3.95289	2.92373	3.01271	3.03435	2.96922	2.92232	3.10624	3.26052	3.31025	3.24505	3.10317	2.97139	3.14663	2.8896	3.28152	2.72031	3.40331	3.08581	3.00824	3.14032	3.15727	3.16485	3.15461	3.59215	3.0672	3.44088	3.23629
ENSG00000069535	MAOB	protein_coding	6.06357	6.68531	6.3264	5.01969	5.26118	4.62219	5.93897	5.21505	7.20351	6.3913	6.28282	7.27438	6.81852	5.8366	6.54089	7.33335	5.09205	8.15747	7.10608	5.40962	7.4429	4.9574	3.35964	7.25936	4.38566	6.13391	6.88131	6.94564	6.57312	7.93737	6.57864	1.69941	2.43086	4.64833	7.20299
ENSG00000069667	RORA	protein_coding	6.58254	4.44454	5.64393	4.42671	6.52569	5.18555	5.25713	4.97707	4.51266	5.86488	5.54518	5.57006	6.97978	5.98379	5.35029	5.23318	5.81635	5.83642	4.99938	6.04064	5.10896	5.93038	4.08774	6.55412	2.76733	5.77245	5.04663	6.84879	5.22626	4.39827	5.44291	2.48893	2.53088	2.53547	5.34515
ENSG00000069696	DRD4	protein_coding	-2.96421	-1.1586	-1.665	-0.00794352	0.266154	-2.24529	-1.58428	-1.45212	-1.31156	-1.8843	-2.89573	-2.61648	-2.13449	-0.519873	-1.37692	-1.82361	-0.895787	-0.722881	-2.34462	-0.957676	-1.71651	-1.93074	1.52955	-1.72287	1.10931	-1.303	-2.68521	-2.16618	-2.5113	-2.12365	-1.09273	-1.2556	-1.39075	1.06347	-1.01636
ENSG00000069702	TGFBR3	protein_coding	8.35147	7.00325	8.29725	6.14276	7.55525	6.35808	7.43235	6.6441	7.3653	8.29814	7.42173	8.1186	8.89508	7.41189	7.84841	8.43573	6.54682	8.40186	8.33295	7.72664	8.19103	6.75416	4.74766	8.46238	3.44899	7.53478	7.42968	9.02542	7.77402	7.81608	8.13697	4.70795	4.8236	3.16824	8.17579
ENSG00000069712	KIAA1107	protein_coding	2.82043	2.26501	1.64962	2.32431	1.89693	2.13567	3.11541	2.46014	2.00574	2.99582	2.74637	3.41424	1.27755	0.874056	2.67224	2.91413	1.15624	2.04672	2.2575	1.6461	3.05015	2.3348	1.72467	1.69283	1.57525	2.55155	2.90772	3.86371	2.94429	2.45588	3.48411	2.16417	2.4251	1.45142	2.86795
ENSG00000069812	HES2	protein_coding	-1.90589	-1.98071	1.07811	2.33139	-0.0852212	1.12999	-4.08843	-1.35461	-0.536091	-2.32064	-2.08836	-2.61648	-1.33384	-1.27373	-2.71786	-1.99682	-1.1788	-2.05199	-2.15523	0.543492	-2.46169	1.21589	-0.160135	-2.04748	-0.182421	-1.11081	-2.87684	-1.63842	-3.50738	-2.97645	-2.50674	1.25728	1.21218	0.821747	-2.17055
ENSG00000069849	ATP1B3	protein_coding	8.03922	6.75766	7.8964	6.2971	7.3871	6.45299	6.59354	5.51269	7.9159	7.13985	6.62162	8.32128	10.3095	9.19174	6.47741	6.79271	5.96452	10.0639	6.41665	8.10598	8.84883	6.60341	6.07928	9.01158	6.47842	7.20734	6.32796	7.05182	6.97262	9.59765	6.41147	5.76025	5.13304	6.14031	7.34962
ENSG00000069869	NEDD4	protein_coding	5.61133	5.02649	5.95296	5.28412	5.22854	4.67039	5.42232	5.02542	5.27688	5.53827	5.54363	5.58372	5.52232	5.74413	5.1603	5.33493	5.26124	5.83796	5.29564	5.13163	5.27824	4.9785	5.46848	5.62227	4.87273	5.34441	5.15709	5.57359	5.21611	5.26409	5.17579	4.85108	5.48234	4.82282	5.0143
ENSG00000069943	PIGB	protein_coding	3.52822	3.00659	2.51175	3.44865	2.7132	2.89472	3.66622	2.7395	3.56262	3.33091	3.0172	3.61994	2.93775	3.4945	3.06264	3.36715	2.88721	3.31722	3.03188	2.93743	3.32214	3.00381	2.74391	3.05298	2.08952	3.29974	3.51721	3.46996	3.45062	3.64993	3.49164	2.59508	2.72169	3.62933	3.49504
ENSG00000069956	MAPK6	protein_coding	6.29207	5.81688	5.65376	5.56416	5.62564	5.32073	4.83475	5.12916	5.10001	6.85272	5.35846	5.82309	7.16103	7.13433	4.80737	5.549	5.27795	6.79598	4.75715	6.08397	6.07133	5.90977	5.05781	7.1729	5.65772	5.80187	5.12227	5.23838	5.04576	5.78274	4.62776	5.1503	4.58204	4.12671	4.83189
ENSG00000069966	GNB5	protein_coding	4.91784	4.44196	4.07217	4.51792	4.45254	4.40457	4.69043	4.47696	4.50903	4.73748	4.67702	3.97916	4.2207	4.81554	4.4246	4.16905	4.98709	3.72792	3.80231	4.24115	3.82528	4.21357	4.51608	4.02641	5.27582	4.2012	4.28213	4.13819	4.11659	4.49098	4.12099	3.7713	3.30237	4.40659	4.37116
ENSG00000069974	RAB27A	protein_coding	5.3197	4.48773	5.67001	4.5697	5.21345	5.55273	5.26058	5.23673	4.76172	5.22719	4.36406	5.27343	6.81996	6.32952	4.68332	5.21591	5.33495	7.23723	4.89343	5.88084	5.53277	5.4254	4.03244	6.97711	3.93968	5.49518	4.1215	5.12633	4.90265	5.89872	4.41446	3.40869	3.5127	3.82253	4.93947
ENSG00000069998	CECR5	protein_coding	3.92394	4.65528	4.26418	3.76837	3.83577	4.09995	4.09771	3.67658	4.68016	3.91136	4.16569	3.90745	4.59143	3.9634	4.21972	3.79016	4.10661	5.66726	4.22082	3.8612	4.70497	3.82293	3.58627	4.29442	5.29679	4.0434	4.08086	4.05237	4.21952	4.88522	3.99943	3.82987	4.43201	4.29491	5.39454
ENSG00000070010	UFD1L	protein_coding	4.92609	5.26855	4.75628	4.44639	4.6266	4.56307	4.39005	4.37935	5.7199	4.6948	4.62935	4.7622	5.30524	4.81554	4.29871	4.69218	4.99721	5.3479	4.76157	4.69174	5.14944	4.57094	4.2001	5.16794	5.73734	4.77628	4.70109	4.64701	4.56695	5.26281	4.46891	4.54798	4.95043	4.83101	4.98607
ENSG00000070018	LRP6	protein_coding	5.83113	5.60598	5.86819	6.29891	6.5475	5.89457	5.76607	5.86684	4.87883	5.88917	5.73731	5.35534	5.5727	5.35517	6.0976	5.68965	5.70073	5.44169	5.68066	5.53696	5.69197	5.37234	6.63216	5.33215	5.19882	6.1656	5.83711	6.06347	5.74766	4.65439	5.76619	5.99863	5.91656	4.65757	5.29501
ENSG00000070047	PHRF1	protein_coding	5.21449	5.63451	4.92145	5.79026	5.21244	4.84727	4.71411	4.752	4.85043	5.06603	5.48234	5.09858	6.2582	5.25417	4.96315	5.08889	4.90187	6.37672	4.99439	4.94486	5.16433	4.46359	4.73306	6.03732	5.03876	4.74711	5.53168	5.15185	4.9524	5.416	4.79083	5.15725	5.08814	4.53252	5.66763
ENSG00000070061	IKBKAP	protein_coding	5.25042	5.1815	4.90508	4.795	4.83148	5.0792	5.03203	4.94631	5.03083	5.13876	5.28764	5.42119	5.64105	5.1855	5.12893	5.46589	5.06892	5.57645	5.24295	5.07549	5.57919	5.03892	5.77487	5.66542	4.90313	5.39874	5.2458	5.33065	5.28892	5.3703	5.33083	4.91232	5.0744	4.4772	4.99718
ENSG00000070081	NUCB2	protein_coding	5.94838	5.83568	5.28114	5.32634	5.30831	5.6716	6.28002	5.55409	5.8185	5.76807	5.89099	5.40944	5.66527	6.80644	5.52401	5.56077	5.82206	5.36077	5.35038	5.2992	5.59271	5.34732	5.01785	5.51851	5.91533	6.15453	5.59482	5.59529	6.24356	5.74834	5.22068	4.24298	4.66142	5.61851	5.08543
ENSG00000070087	PFN2	protein_coding	5.6266	5.68559	5.58088	6.57263	6.60566	5.53311	5.80597	5.8407	5.71519	5.53278	5.50413	5.38804	5.51168	5.54144	5.34617	5.80795	6.11292	5.30418	5.64208	5.87711	5.93903	5.73888	6.80394	5.25354	8.19149	6.11661	5.34042	5.41515	5.52187	5.59987	5.16758	7.01757	7.00406	6.35725	5.45757
ENSG00000070159	PTPN3	protein_coding	3.57514	4.01179	4.00971	4.19226	4.19234	1.62105	4.53765	2.86627	3.98982	3.95147	3.79082	4.26913	4.93474	3.69357	4.67938	4.12745	2.26711	6.41628	3.46972	4.46025	4.67985	3.20028	4.59893	4.2718	4.85304	3.29974	4.38986	4.20643	4.75626	5.62403	4.6765	4.15824	4.32772	3.5951	5.04912
ENSG00000070182	SPTB	protein_coding	2.72528	3.28525	2.83934	3.8095	3.82787	1.62105	2.52006	1.66762	3.2512	2.71434	3.53267	4.2026	4.27627	2.47463	3.48218	3.9862	2.81054	4.32614	3.20173	2.61111	3.35713	2.67651	3.59804	2.93703	-0.278403	2.58665	3.34394	2.70509	2.52198	4.09244	4.09154	0.740169	1.30299	0.740559	4.52749
ENSG00000070190	DAPP1	protein_coding	3.28302	1.28255	1.94492	3.09247	2.82856	4.12742	1.96521	3.76603	0.401073	1.66424	1.48802	2.86571	2.29349	2.92232	1.21367	1.62999	3.49309	2.51404	1.6689	3.51103	1.48553	3.608	2.39173	3.53928	2.79117	3.06605	0.952086	2.30639	1.93341	1.69308	2.4145	3.6246	3.11095	2.15171	0.662937
ENSG00000070193	FGF10	protein_coding	4.16053	3.5187	4.3694	0.911489	3.30906	2.66024	4.50117	3.04219	2.46128	4.96351	4.41606	5.08239	4.46469	4.74285	4.57746	5.11574	3.04056	4.97389	5.43386	3.70515	5.37102	1.69539	1.2452	4.76669	-1.54631	4.23919	4.44085	5.28768	4.50902	4.29418	4.57022	-0.803089	-1.3116	0.247577	4.39749
ENSG00000070214	SLC44A1	protein_coding	7.2242	6.60741	6.76758	6.44674	7.4927	6.90245	6.77417	7.10448	6.52522	7.23804	6.80313	6.46573	6.75298	6.78664	6.83338	6.5392	7.34871	6.79992	6.42595	6.8749	6.54771	7.24677	7.07418	6.58747	7.12739	7.02521	6.23137	7.18234	6.47913	6.48815	6.27516	6.69122	6.63663	6.91456	6.80492
ENSG00000070269	TMEM260	protein_coding	4.1689	3.62718	3.75028	4.17269	4.31234	4.2401	4.36676	3.94666	4.04098	4.33176	4.25787	3.84949	4.10269	3.84016	4.09542	4.16392	3.96639	3.9987	3.96423	3.79953	4.03426	4.01903	4.46558	4.07946	3.12713	4.03326	4.28785	4.40713	4.12867	3.94994	3.95107	4.65592	4.70133	4.26135	3.96631
ENSG00000070366	SMG6	protein_coding	5.08782	6.10891	4.65054	4.6312	4.49641	5.38692	5.43459	5.44235	5.70729	5.25149	5.8386	5.39163	5.18084	5.13832	5.35029	5.53116	5.66669	5.20781	5.1948	4.97446	5.53786	5.09046	6.06769	4.9644	4.51834	5.33308	5.73604	5.28647	5.22626	5.19452	5.31923	4.62818	4.34462	4.89338	5.69745
ENSG00000070367	EXOC5	protein_coding	6.16745	5.66803	6.20119	6.17556	6.42191	6.45258	6.12018	6.13373	5.23355	6.39494	5.33793	6.69309	6.81636	6.56561	6.18937	6.40906	5.74775	7.12296	6.54423	6.28524	6.70253	6.03819	5.9348	6.88698	5.21763	6.6554	5.5147	6.69696	6.48947	5.91839	6.35064	5.24466	5.05213	4.3114	5.65833
ENSG00000070371	CLTCL1	protein_coding	3.22534	2.92762	2.42251	1.10558	2.75268	1.89136	2.14521	1.64421	3.61758	2.41298	2.92449	3.44679	3.154	2.42784	3.05457	3.12966	2.40388	3.62506	3.39214	1.86662	3.40249	1.71788	1.01879	2.99893	0.970045	2.52285	3.12477	3.00539	2.39179	3.09164	2.73324	1.69941	0.28698	1.67181	3.58942
ENSG00000070404	FSTL3	protein_coding	6.58827	6.38228	6.50001	3.38886	6.13704	4.47535	3.50103	4.48521	7.23186	5.93157	5.65602	6.44574	7.43339	6.39059	5.04994	6.0575	6.10358	6.91776	6.47739	5.95626	6.41011	5.10972	4.22308	7.19771	4.38957	6.49424	5.82633	5.50647	5.38263	7.2733	4.29253	5.40327	4.15909	6.00128	5.58985
ENSG00000070413	DGCR2	protein_coding	6.15837	6.74933	5.81293	6.00683	6.16553	6.15337	6.27661	6.19541	6.51802	6.16482	6.31331	5.97033	5.9307	5.8911	6.3875	6.2624	6.41221	6.21258	6.09334	5.70279	6.21969	5.77217	5.4096	5.64709	7.51778	6.11661	6.24835	6.27747	6.22456	5.81721	5.97611	5.80075	6.24946	6.49564	6.67258
ENSG00000070423	RNF126	protein_coding	4.29149	4.76466	4.22073	3.38206	4.04335	3.63891	3.64174	3.39748	4.8418	4.08968	4.10994	4.16675	5.62961	4.63161	3.69442	3.89306	4.28723	5.37985	3.86107	4.41161	3.97543	3.76201	3.94069	5.05989	3.76109	3.81681	4.19341	3.96416	3.91666	5.27049	3.72046	3.78032	5.20882	4.93958	4.95349
ENSG00000070444	MNT	protein_coding	5.0834	5.24801	5.20067	3.89317	5.09884	4.76222	4.84091	4.49014	4.32313	4.94377	4.37986	5.29531	6.21728	5.26619	4.90486	4.63023	4.6354	6.21731	4.14627	5.29138	4.66597	4.42481	5.14161	5.73569	4.14557	4.31021	4.19036	4.05237	3.85405	5.35834	3.95379	4.34021	4.77116	4.03605	5.03241
ENSG00000070476	ZXDC	protein_coding	4.13513	4.73334	4.54879	3.87149	4.6685	3.85148	3.98264	3.91524	4.4152	4.35438	4.54467	4.22958	4.42363	3.9031	4.17946	4.00356	4.49137	4.73793	4.1075	4.32671	4.2104	4.0789	3.98841	4.2989	4.3093	4.10522	4.50738	4.32923	3.98466	4.29418	4.13308	4.73977	5.05119	4.28062	4.71712
ENSG00000070495	JMJD6	protein_coding	5.2906	4.47516	4.89405	3.23889	4.77917	4.2088	3.58048	3.64745	5.25104	4.63654	4.35875	5.2799	5.93734	5.44955	3.83298	4.6524	4.37859	6.77531	3.99954	4.69852	5.66546	4.27931	3.39379	5.92005	4.01753	4.51356	4.16103	4.92452	4.02655	5.81809	3.50659	4.30686	3.5791	5.24571	4.70963
ENSG00000070501	POLB	protein_coding	3.61652	2.80445	3.37548	3.78135	3.07988	3.4443	3.10009	3.14997	4.36388	3.47087	3.49448	3.3953	3.47219	3.79662	2.95403	3.54754	3.34238	3.34338	2.87235	2.82431	3.39129	3.04441	4.73038	3.16522	4.54137	3.40574	3.34394	3.32638	3.18065	3.63018	3.06151	3.6226	4.36584	4.01607	3.543
ENSG00000070526	ST6GALNAC1	protein_coding	1.66893	0.916748	4.10361	3.05021	2.63082	-0.0797903	1.50405	0.885857	3.12411	2.12807	2.1838	1.25564	0.80605	0.418009	1.04469	1.9731	1.13543	-0.875415	1.74219	3.575	0.761664	-0.282875	0.640573	0.285171	5.47845	-1.78695	1.72585	0.764631	0.423883	0.847791	-0.449098	4.2019	2.79505	3.58738	1.94218
ENSG00000070540	WIPI1	protein_coding	4.29913	4.99866	4.39309	3.50293	4.62812	4.20484	4.18018	3.92498	5.30645	4.24567	4.33913	4.54095	4.57448	4.9754	3.77768	4.84439	4.22212	5.14227	5.01302	4.62398	4.60421	3.97537	3.81524	4.75369	2.76131	4.9521	4.0254	4.77179	4.12626	4.54894	4.09649	4.01719	3.31177	4.13468	5.12761
ENSG00000070601	FRMPD1	protein_coding	-0.223686	1.98201	1.39198	3.07992	0.442091	-0.529803	1.37417	0.472813	1.7592	0.293119	1.26418	1.14661	0.312117	-0.135561	1.13931	1.0951	1.17675	1.5737	0.317763	0.315738	1.07355	0.106135	0.750103	0.422917	0.505955	-0.0250539	1.00865	0.190658	1.04989	0.733959	1.34971	0.463533	2.49831	1.04104	0.637916
ENSG00000070610	GBA2	protein_coding	4.85007	5.49458	4.91738	5.42721	4.81825	4.60576	4.64363	4.78715	5.61577	4.87418	5.27267	5.1117	4.96887	5.10599	4.97602	4.77198	5.11879	5.67586	5.19372	4.94344	5.03887	4.58324	5.44015	5.44157	3.92628	5.05468	5.17574	4.86405	5.12503	5.83112	5.08781	5.32645	6.15509	4.92893	5.76978
ENSG00000070614	NDST1	protein_coding	6.25718	7.7218	6.4211	6.49677	6.11556	6.53022	6.18516	6.62928	6.97004	6.67548	6.95294	7.19856	7.63325	7.15674	7.03552	7.02571	6.70698	7.36561	7.48182	6.78587	7.0663	5.95129	6.1589	7.0276	6.09546	7.44152	6.78163	7.17908	7.08314	6.83685	6.91718	6.68595	6.54391	5.55957	6.73585
ENSG00000070669	ASNS	protein_coding	3.78205	3.15264	3.88443	4.82664	3.33158	3.00818	3.29663	3.60566	4.3996	3.42412	3.74817	3.66016	4.85557	3.68563	3.32667	3.55148	3.84989	5.09686	3.30613	3.89698	4.09424	3.92068	4.03893	5.09896	4.94756	3.287	3.49758	3.22374	3.52192	4.66801	3.31182	5.30909	5.14098	4.7242	4.26689
ENSG00000070718	AP3M2	protein_coding	3.41552	3.08146	3.81307	4.38651	3.49018	4.15643	3.7987	3.96803	3.54146	2.95036	3.60017	3.70315	3.34202	2.78053	3.57255	3.59792	3.5842	3.32599	3.79658	3.73181	3.16649	3.15567	5.14863	3.77946	4.71498	3.40181	3.84883	3.61607	3.48107	3.66941	3.61748	4.16377	4.61913	4.69217	3.94351
ENSG00000070729	CNGB1	protein_coding	-3.41948	-4.08843	1.03861	0.596096	-0.444824	-4.08843	-3.06094	-2.63472	-4.08843	-4.08843	-4.08843	-3.4182	-3.11898	-2.31684	-3.24616	-3.46203	-2.69415	-3.06403	-4.08843	-1.7272	-3.32625	-1.93074	-3.58421	-4.08843	2.22696	-4.08843	-4.08843	-4.08843	-4.08843	-4.08843	-4.08843	-0.640032	-1.23658	-0.105807	-4.08843
ENSG00000070731	ST6GALNAC2	protein_coding	1.27314	0.82465	3.20311	3.79932	4.76683	2.7554	2.9314	2.49979	3.29401	1.95473	1.60017	2.10419	2.91638	2.39901	1.92122	1.94942	1.48705	3.52956	2.45209	4.50344	2.50191	3.93515	4.37101	2.57269	3.55025	1.75677	2.59786	2.57612	2.19458	3.41619	2.47656	5.45775	4.34309	7.64304	2.4816
ENSG00000070756	PABPC1	protein_coding	10.2659	9.82522	9.77199	10.4971	9.80702	9.9198	10.2007	9.75387	9.95168	10.1075	9.68929	9.96791	10.4874	10.2891	9.64963	9.68279	9.73405	10.7868	9.53632	10.173	10.1736	9.84346	9.2667	10.7097	11.5489	9.72507	9.46299	9.95628	9.65985	10.3606	9.60644	10.8323	10.5229	10.022	9.96426
ENSG00000070759	TESK2	protein_coding	2.81333	2.77194	1.75085	2.92014	1.88682	2.77691	2.81733	2.85612	3.20709	2.48762	3.04829	2.13876	1.09941	2.63155	2.13532	2.5626	2.83655	1.93648	1.89999	1.36879	2.68746	2.68795	2.61664	1.69283	1.12815	2.70637	2.77949	2.58403	2.41564	2.38222	2.46895	2.55355	2.45935	2.28175	2.59645
ENSG00000070761	C16orf80	protein_coding	5.03996	5.00566	4.54527	3.76053	4.67291	4.00746	4.81141	4.08345	5.84321	4.41778	4.74772	4.7436	4.43119	4.65008	4.55475	5.0698	4.62611	4.77042	4.17302	4.16005	5.23813	4.5632	4.41326	4.36663	4.78789	4.67556	4.15478	5.14116	4.55089	4.82915	4.56844	4.13731	4.41466	5.11357	4.33074
ENSG00000070770	CSNK2A2	protein_coding	5.95807	6.03635	5.46555	5.37766	5.87286	5.49144	6.26119	5.66435	6.15093	5.98327	6.02206	6.067	6.51786	6.15519	5.88593	5.80218	5.35759	7.18273	5.73927	5.60794	6.35637	5.53077	5.56232	6.47466	5.89347	5.56636	5.87848	6.02838	5.92219	6.61415	6.27079	5.58739	5.20294	5.71995	6.56925
ENSG00000070778	PTPN21	protein_coding	5.61847	5.68994	5.10234	5.00095	5.26313	4.88984	5.25597	5.05678	5.42289	5.70982	5.84431	5.54665	5.62138	4.87257	5.47421	5.72233	4.84053	5.46173	5.90536	4.88228	5.72805	4.56475	4.53762	5.69121	2.51873	5.64838	5.4149	5.66317	5.2195	5.14109	5.55771	4.33287	4.08058	3.68825	5.32177
ENSG00000070785	EIF2B3	protein_coding	4.25002	4.66638	3.74722	3.77358	3.54904	3.8766	3.90246	3.43547	4.86754	4.00327	4.10572	4.83429	4.91872	3.86144	4.20156	4.37863	3.6771	5.58012	4.41823	3.53771	5.12089	3.70124	3.34225	4.80342	4.69142	4.23698	4.46758	4.50208	4.72479	5.00201	4.40452	3.76948	3.85474	4.32074	5.00577
ENSG00000070808	CAMK2A	protein_coding	-1.72963	1.41478	-1.03983	-1.96703	-0.664995	-0.697628	-1.04066	-0.946659	-1.79493	-0.0854383	-1.28099	-0.546934	2.09858	-0.135561	0.0204116	-0.020831	1.15624	-0.722881	-1.16667	1.10893	-2.16845	-0.52542	-0.468349	1.85983	-1.13345	0.0968136	0.374601	-1.96803	-1.19173	0.326031	-1.28529	-2.2305	-1.47449	-1.65876	-1.37532
ENSG00000070814	TCOF1	protein_coding	4.63939	5.4231	4.52755	4.99762	4.35512	4.53337	4.32782	4.56993	4.67692	4.60335	4.94234	4.4635	5.38129	4.49981	4.49785	4.47923	4.73038	5.4657	4.77909	4.53406	4.91911	4.3258	5.02004	5.32228	6.47612	4.49706	5.08412	4.51249	4.77328	4.8515	4.56309	5.27946	5.88803	5.4177	5.24618
ENSG00000070831	CDC42	protein_coding	8.40927	7.86547	8.816	8.19228	8.10324	8.35809	7.92349	7.8752	8.44652	8.33887	7.8236	8.18627	8.89405	8.67986	7.67714	8.27309	8.07338	8.89898	7.97632	8.15805	8.41698	8.16675	7.51903	8.66732	9.0107	8.44702	7.65915	8.14375	8.09641	8.43205	7.83591	7.64496	7.90958	7.77313	7.81313
ENSG00000070882	OSBPL3	protein_coding	4.08884	4.02909	4.73482	4.86737	4.21675	5.08352	3.97985	4.2651	3.21602	4.01909	3.62395	3.30685	4.59816	4.6419	3.55264	3.47889	4.48932	3.36907	3.3301	4.65739	2.93137	4.99931	3.86479	3.17012	4.90722	4.68692	2.93351	3.39996	3.15255	2.93302	3.31182	4.42901	5.63624	4.00742	2.45319
ENSG00000070950	RAD18	protein_coding	3.00624	2.84408	2.98671	4.03861	3.11059	3.16322	3.28312	2.93055	2.9423	3.08867	3.03948	3.07657	3.10762	3.32096	2.74425	3.11908	2.96592	3.44351	2.67435	2.45186	2.91581	3.34093	3.93142	2.89029	3.76711	3.20354	2.98728	3.08562	2.99265	2.78368	2.96739	4.10749	5.12061	3.29212	2.8946
ENSG00000070961	ATP2B1	protein_coding	6.85047	6.44291	6.08726	6.39237	6.97886	6.21129	7.41259	6.59078	5.64582	7.09579	6.54855	6.61747	7.42159	8.4436	7.04421	6.298	5.60655	6.60378	5.72276	6.40137	6.19492	5.96311	6.33711	7.152	5.35992	6.37382	6.55441	6.03921	6.87674	6.24427	6.65569	5.97681	6.51842	5.16374	5.88059
ENSG00000070985	TRPM5	protein_coding	-3.41948	-2.87179	1.96613	1.97262	-0.997947	-4.08843	-4.08843	-3.5676	-4.08843	-2.94919	-4.08843	-4.08843	-4.08843	-3.40714	-3.60668	-3.46203	-2.69415	-2.47103	-3.53278	-4.08843	-4.08843	-4.08843	0.983333	-4.08843	-1.04637	-4.08843	-3.35902	-3.44871	-4.08843	-4.08843	-3.50511	-0.209932	-1.98659	-0.970993	-4.08843
ENSG00000071051	NCK2	protein_coding	6.19434	6.1267	6.13016	5.2274	5.56593	5.24752	5.59715	5.48661	6.18659	5.86663	6.04206	5.23666	6.08589	5.74795	5.5108	5.4638	6.0962	5.77369	5.87037	5.81223	5.39647	5.55439	5.65677	5.49625	5.30716	5.56899	5.50858	5.90507	5.5053	5.84746	5.04749	5.44248	5.60789	5.43286	5.62767
ENSG00000071054	MAP4K4	protein_coding	7.51612	7.83013	7.1219	6.14978	7.326	6.96263	7.17181	7.44513	6.9601	7.3523	7.19988	6.86556	8.56214	8.0625	7.1312	7.28273	7.07899	8.57236	7.25124	7.44911	7.20038	6.92275	6.95999	8.54274	6.91463	7.69755	6.78669	7.57076	7.19472	7.55574	6.81355	7.00934	6.46252	6.28572	7.01961
ENSG00000071073	MGAT4A	protein_coding	5.61949	4.45993	5.61149	5.5075	5.78784	6.03842	5.12077	5.30454	5.33543	5.37091	5.09796	4.96206	5.82143	6.56561	4.91827	4.75159	5.10414	6.10074	6.07395	5.84923	4.5346	6.08489	5.33421	6.08999	4.966	6.22528	4.75891	5.63011	5.42142	5.39743	5.15221	5.4751	4.1643	4.78451	4.69454
ENSG00000071082	RPL31	protein_coding	9.48532	9.11048	8.97352	9.20586	8.8319	8.89271	9.06858	8.80057	9.72574	9.0741	8.87302	8.46231	8.92631	8.77897	8.70347	8.88313	9.52887	9.24058	8.51247	8.90433	9.08986	8.85628	8.99224	8.98749	8.42428	8.74191	8.70092	8.71313	8.70404	8.98861	8.3853	8.8923	9.9171	10.4853	9.08381
ENSG00000071127	WDR1	protein_coding	7.54213	7.84437	7.9062	7.01663	7.63402	7.88703	7.40585	7.14203	7.97727	7.65572	7.65548	7.81307	8.71169	8.23228	7.08341	7.42636	7.80846	8.42245	7.10666	8.08287	7.76371	7.49827	7.58371	8.19126	8.17544	7.60343	7.72802	7.13296	7.34948	8.49824	7.01191	7.93928	7.36242	8.13396	8.19883
ENSG00000071189	SNX13	protein_coding	6.23874	5.19842	5.61317	5.35614	5.93425	5.64991	6.41154	5.52636	4.74021	6.35874	5.50413	6.13137	6.38222	6.16306	6.43296	5.80548	5.37433	6.82179	6.09858	5.61243	6.18116	5.88142	4.76342	6.55646	4.28011	6.06776	5.91824	6.65155	6.38262	5.96408	6.1528	4.7916	4.76889	4.2854	6.4386
ENSG00000071205	ARHGAP10	protein_coding	5.76367	5.22418	5.6182	3.45515	5.22954	4.92519	4.72581	4.38642	5.49987	5.57404	5.5798	5.16439	5.93469	4.26972	5.22465	5.49992	5.17976	6.21022	5.78407	4.58063	5.88811	4.47848	3.0948	5.73734	3.03029	4.99323	5.3731	5.75542	4.83794	5.64584	4.90525	2.81488	3.00672	3.75178	6.46107
ENSG00000071242	RPS6KA2	protein_coding	6.39791	6.04232	6.44726	5.43545	5.94403	6.02106	5.95893	5.36573	6.61152	6.79603	6.33868	6.1681	6.6922	6.88389	5.6043	5.98655	6.05594	6.29866	6.51185	5.70195	6.00118	5.78087	5.26022	6.16185	4.17984	6.07766	5.83662	6.4654	6.03745	5.98522	5.56755	4.92703	4.53598	5.00767	7.36519
ENSG00000071243	ING3	protein_coding	4.03492	3.51379	3.93639	4.09375	3.42882	3.77873	3.88468	3.50207	4.3065	4.26436	4.05195	4.05654	4.74477	4.09503	3.65226	4.24397	3.80118	4.80848	3.59041	4.08707	4.2008	4.21555	3.55038	4.47554	2.78524	4.18525	3.94435	4.42707	3.80975	4.17927	3.94009	3.0209	3.19466	3.10477	3.80707
ENSG00000071246	VASH1	protein_coding	4.80246	7.61816	4.77893	5.13539	4.81692	5.94651	4.48159	6.05106	5.34767	5.21762	5.66751	5.45474	4.89706	5.66664	5.45747	6.03939	5.84947	4.18862	5.58761	5.09231	5.10896	5.48725	6.16929	4.64878	4.29269	6.34541	5.15475	5.55156	5.38867	4.15459	5.48503	5.0884	3.35183	4.71891	4.68541
ENSG00000071282	LMCD1	protein_coding	6.82156	5.81787	7.06897	4.5697	7.00099	5.39216	4.99523	5.10472	7.55895	6.90174	6.40452	6.28396	8.62317	7.0873	5.58061	6.63278	6.80535	8.72669	6.84802	7.66572	6.96079	6.58632	5.11626	9.18938	5.67544	6.20396	5.95333	6.74142	5.48102	7.34836	4.86811	4.83903	5.52811	6.23413	7.17852
ENSG00000071462	WBSCR22	protein_coding	5.27776	5.09544	5.55575	5.7043	4.99447	4.62516	4.59526	4.60217	5.67202	4.84962	4.79824	4.82901	5.83288	5.18972	4.58168	5.04627	5.11614	6.42549	4.865	5.00757	5.41596	4.73428	5.40542	5.8765	5.27053	4.74245	4.84879	4.78042	5.13225	5.70934	4.65653	5.58636	6.15466	6.17613	5.37101
ENSG00000071537	SEL1L	protein_coding	7.12554	6.81463	6.87134	7.13913	7.16311	7.38999	7.4144	7.14099	6.64663	7.39958	6.9236	7.33154	7.48238	7.48771	7.28052	7.11091	6.8571	7.69296	7.3769	6.97244	7.26513	7.16013	6.58379	7.40676	6.00407	7.52441	6.99066	7.54489	7.5083	6.93148	7.2314	6.66196	5.95857	5.85144	7.11251
ENSG00000071539	TRIP13	protein_coding	0.755865	2.45106	2.48261	4.6666	2.25218	0.894496	0.455516	1.44193	0.632167	0.840656	0.371097	0.270087	1.68382	2.26699	0.737048	-0.020831	1.17675	1.12856	1.05309	0.482004	0.65324	1.56502	3.87208	1.00869	5.025	1.15342	0.00919759	0.347661	0.655132	0.847791	0.461451	3.90609	4.88159	2.30075	0.826898
ENSG00000071553	ATP6AP1	protein_coding	6.50038	6.89796	6.36433	6.51747	6.41928	7.53411	5.97931	6.09002	7.21692	6.52412	6.41351	6.24747	6.6139	6.5876	6.0064	6.54563	6.75039	6.40079	6.28232	6.58667	6.36714	6.92607	6.09908	6.16921	8.60063	6.75442	6.22318	6.36562	6.06347	6.71182	5.82254	6.95834	6.07498	7.39868	6.57791
ENSG00000071564	TCF3	protein_coding	4.95057	6.05505	4.65708	4.83164	5.20839	5.10174	4.64891	5.47588	5.19567	4.55861	5.10114	4.58131	5.23793	5.03126	4.88679	4.74816	5.50579	4.60369	4.68309	4.87333	4.50371	4.79238	6.55766	4.66101	5.98611	5.12561	4.91687	4.59117	4.52555	4.83778	4.47081	6.40781	6.73224	5.85224	4.60539
ENSG00000071575	TRIB2	protein_coding	6.30984	6.27182	5.91937	5.57613	6.64741	5.69014	5.45882	6.01674	6.21471	5.92654	5.98581	5.58268	5.45167	5.9519	5.73944	5.52015	5.54969	6.03806	5.96654	5.80048	5.35524	5.05446	6.18449	5.57317	6.31022	5.65583	5.13185	5.79942	5.51085	5.83716	5.53145	6.31487	5.55607	5.89273	5.85368
ENSG00000071626	DAZAP1	protein_coding	6.31299	6.36808	6.07754	5.44282	5.87094	5.60477	5.98974	5.52155	6.71122	6.10087	5.89527	6.036	6.81852	6.3365	5.91352	6.07265	6.18998	7.52552	5.90603	6.08784	6.65059	5.84549	5.68463	6.82114	6.5854	5.82189	5.87611	6.04209	6.20188	6.63907	5.84477	6.02166	6.50345	6.05404	6.33878
ENSG00000071655	MBD3	protein_coding	5.42243	6.68966	5.22066	5.17625	4.94419	5.55351	5.37217	5.24841	6.52253	5.59951	5.73116	5.74856	6.27508	5.87897	5.50563	5.75087	5.86693	7.07953	5.74448	5.54167	6.14074	4.97033	5.87439	6.18625	5.40696	5.7307	5.792	5.27184	5.69261	6.47714	5.35064	5.26924	5.76961	6.37417	6.23675
ENSG00000071794	HLTF	protein_coding	5.71878	5.04361	5.24364	5.91443	5.70471	5.25137	5.39013	5.33134	4.55551	5.67231	5.14597	5.57217	5.31343	4.95079	5.5313	5.61541	4.81131	5.36715	5.4097	4.90881	5.57672	5.17314	5.19101	5.33106	5.47201	5.84382	5.09804	5.82636	5.76246	4.67381	5.74113	5.53926	5.65791	4.52849	4.75688
ENSG00000071859	FAM50A	protein_coding	4.94733	5.87543	4.69568	4.91053	4.45597	5.11341	4.64539	4.66457	6.16829	4.81743	4.95411	5.25253	5.06425	4.80642	4.87767	5.45752	5.39089	5.73962	5.45763	4.95762	5.96289	4.65492	4.81475	5.26389	6.37869	5.04083	5.12467	5.16773	4.92358	5.83716	5.04109	5.0092	4.63919	5.81141	5.62051
ENSG00000071889	FAM3A	protein_coding	4.71182	5.28304	3.86762	3.82962	4.02964	4.23039	4.70063	4.30482	5.60561	4.92542	4.95996	4.87587	4.21633	4.22389	4.50083	4.99514	4.7915	4.78322	4.61317	4.32671	5.01351	4.22931	4.29172	4.5088	6.01423	4.2012	4.95515	4.81446	4.58283	5.00047	4.41644	4.84421	4.09881	5.62795	5.08427
ENSG00000071894	CPSF1	protein_coding	5.56241	6.59933	6.09269	5.83513	5.89823	5.53232	5.40891	5.53274	5.69935	5.12275	6.1818	5.20302	5.59305	5.46702	5.14137	5.13424	6.31321	5.34359	5.04837	5.78941	5.0208	5.90243	6.35369	5.31123	6.82653	5.72913	5.34866	5.52817	5.55356	5.74834	5.38846	6.75742	5.53012	6.93066	5.78553
ENSG00000071909	MYO3B	protein_coding	-1.72963	-0.0681487	1.2084	3.81455	1.13122	-1.56625	-2.46693	0.71668	-0.536091	-1.8843	-0.829606	-1.18066	-4.08843	-1.40313	-2.95796	-1.99682	-0.119683	-4.08843	-1.98784	-0.184806	-3.32625	0.327012	2.85597	-1.72287	0.416821	-0.468114	-1.68877	-2.39596	-2.5113	-2.63314	-3.09089	1.95042	5.00072	1.85011	-1.71883
ENSG00000071967	CYBRD1	protein_coding	10.0083	9.27585	8.81152	7.89872	9.19053	9.59346	9.9329	8.97418	9.29617	10.2143	9.65706	9.88934	9.7837	9.95123	9.6214	10.3417	9.17828	9.31668	9.75771	9.29019	9.83968	8.64774	8.20012	9.91231	6.53025	9.64122	9.74199	10.1494	9.78197	9.72654	9.62871	7.23561	7.55059	8.12665	9.54731
ENSG00000071991	CDH19	protein_coding	1.55437	-1.98071	3.62587	-0.0812163	2.75824	0.461763	-0.337637	-0.108169	1.60454	0.450676	2.8758	2.31034	3.25107	2.96883	1.62682	1.02885	1.13543	2.41885	0.89065	0.243468	-0.974643	0.0362751	-1.71448	3.42913	-4.08843	0.587397	2.34679	-1.25285	1.1669	3.10314	-0.138834	-2.97299	-3.63864	-4.08843	2.19468
ENSG00000071994	PDCD2	protein_coding	5.00922	4.95588	5.11188	4.74553	4.64321	5.08136	5.11696	4.89766	5.56773	5.11099	5.10537	5.24197	6.17067	5.2715	4.98667	5.10506	5.10682	6.53168	5.09574	5.26081	5.6349	4.93117	4.96997	5.97289	4.823	5.10275	5.14453	4.97805	5.24966	6.08072	4.97006	5.18199	5.6985	5.54171	5.68834
ENSG00000072041	SLC6A15	protein_coding	-3.41948	-3.35549	-3.51803	-3.58366	-1.43155	-3.19109	-3.06094	-2.88407	-3.10613	-2.94919	-2.6478	-3.4182	-3.11898	-1.40313	-2.51207	-4.08843	-1.8254	-2.05199	0.632458	-3.06374	-4.08843	0.236457	-2.66974	-2.46701	-2.12693	-2.78181	-1.98751	-3.00706	-0.575604	-1.74788	-1.63302	2.66305	1.66771	1.06347	-1.48099
ENSG00000072042	RDH11	protein_coding	5.40365	5.55911	5.16787	5.99907	5.51845	5.77742	5.329	5.13021	5.33543	5.47891	5.30245	5.29147	5.49195	5.49339	5.17712	5.3688	5.36989	5.42137	5.23662	5.35493	5.59515	5.17416	5.58023	5.02651	5.75487	5.61901	5.11424	5.24838	5.45441	5.29703	5.14028	5.50536	4.95544	5.03346	5.27993
ENSG00000072062	PRKACA	protein_coding	6.54016	7.55985	6.34978	6.49046	6.25222	6.54909	6.68583	6.32937	7.59577	6.72018	6.70411	7.30324	6.73173	7.03557	6.644	6.52324	6.26733	7.48693	6.80413	6.35389	7.14264	6.33268	6.04906	6.73737	6.44453	6.82151	6.83074	6.83517	7.085	7.29479	6.91578	6.37302	5.79777	6.95336	7.21916
ENSG00000072071	LPHN1	protein_coding	4.65338	6.02432	4.14138	4.22682	4.7135	4.2459	4.40051	4.37935	5.23794	5.01647	4.89181	4.89791	4.84147	4.49981	4.94362	4.95705	4.6391	5.21254	4.83041	4.35914	5.49792	3.84353	4.5315	4.69371	6.54478	4.83584	5.14216	4.94002	4.85257	4.87182	5.0204	5.93092	3.34268	5.35544	4.58098
ENSG00000072080	SPP2	protein_coding	-0.283322	-2.22129	-0.271488	-0.23997	-0.606723	-1.27317	-0.179669	-0.811095	-0.661349	-0.257645	0.0231726	-1.29907	-0.239089	-1.703	-0.867309	-0.810545	-0.812573	0.0446181	-0.777089	-0.957676	-1.09558	-0.753893	-1.49859	-0.646859	-0.812832	-1.11081	-0.298663	-0.697978	-0.851023	0.577745	-0.449098	-0.181603	0.741316	0.594185	-0.383461
ENSG00000072110	ACTN1	protein_coding	7.60078	8.09429	8.16938	7.76824	8.11397	7.37155	7.09466	6.70545	7.43581	7.43331	7.57141	7.89056	8.79417	7.82898	7.13264	7.42582	7.6043	9.03493	7.27973	7.92667	7.38227	6.97094	7.97707	7.9599	7.82868	7.59871	7.63914	6.98727	7.33678	8.4312	6.87316	7.79527	7.51422	8.0151	8.10495
ENSG00000072121	ZFYVE26	protein_coding	4.61918	5.20756	4.43171	5.10578	4.70778	6.39637	4.84704	4.9475	4.62086	4.74891	5.02169	4.94913	4.41223	4.51779	4.86157	4.85877	4.4749	5.31524	4.86773	4.50923	4.87352	5.05225	5.28592	4.84997	4.49313	5.21916	5.22357	5.0612	4.99918	4.38183	5.21954	4.98285	5.20378	4.32539	5.31291
ENSG00000072133	RPS6KA6	protein_coding	0.0900971	-0.0681487	-0.222682	-0.198614	0.169425	-0.200695	1.32229	0.671093	-1.79493	0.592708	0.627873	-0.00387489	0.437409	0.418009	0.519765	-0.117565	-1.1788	0.279504	-0.777089	-0.0424754	-0.572325	0.593404	0.617633	-0.0374255	-2.79722	-0.468114	0.734588	0.23154	0.423883	0.0686584	0.228827	1.30811	-0.226866	-0.442535	0.933562
ENSG00000072134	EPN2	protein_coding	5.59693	5.80788	5.394	4.809	5.02589	4.69461	5.21862	4.84859	5.83598	5.46743	5.81297	5.62699	5.98687	5.59326	5.31187	5.57825	5.13591	5.47362	5.46035	4.771	5.39927	4.28308	5.13254	5.44663	4.55535	5.34338	5.71069	5.53839	5.36539	5.62003	5.12462	4.97815	5.33255	4.65573	4.97986
ENSG00000072135	PTPN18	protein_coding	5.43636	6.19803	5.30526	5.43298	4.74601	5.98398	5.49345	5.19304	6.47681	6.05865	6.05359	5.38204	4.43495	5.50019	5.14992	5.25387	5.67393	4.87275	5.61794	4.97446	5.25059	5.8001	4.81349	4.76831	5.61995	5.57425	5.53108	5.41736	5.41454	5.3857	5.39951	5.43735	5.75876	6.38978	5.75676
ENSG00000072163	LIMS2	protein_coding	5.35558	5.85811	5.89332	4.77438	5.16724	5.0105	4.89815	4.52419	7.55279	5.23668	6.25597	5.6876	5.32969	4.82098	5.49672	5.99381	5.50376	5.15709	6.45712	4.92334	5.70786	4.15503	5.07475	5.06253	5.04497	5.60281	5.89826	5.43825	4.76866	5.99684	5.22746	3.94836	3.55818	5.80643	6.59385
ENSG00000072195	SPEG	protein_coding	4.90119	5.85811	5.32489	3.59401	4.11436	4.39069	5.10805	4.3917	4.44209	4.94542	5.79802	4.50385	4.89979	4.74667	5.03566	4.64505	5.47403	3.5066	3.39593	4.49763	3.40807	3.61101	4.26613	4.02099	3.25263	4.42325	5.58264	3.99417	4.85403	5.03843	4.16876	4.19787	4.64043	4.68315	6.04427
ENSG00000072201	LNX1	protein_coding	4.09471	2.97123	3.89552	1.5797	3.03939	1.38935	3.06894	1.63237	4.64752	3.457	4.45801	3.16868	2.35831	3.27939	3.05861	3.78348	1.65727	3.26344	4.01441	2.37783	3.75706	2.6239	1.00117	3.12036	2.48258	3.13406	3.34394	5.07531	3.46973	3.10314	3.00472	2.20229	1.57702	2.61354	4.06582
ENSG00000072210	ALDH3A2	protein_coding	7.18726	6.88091	5.62572	6.26974	5.60576	5.96712	6.61706	6.0671	7.12567	6.86896	6.80995	7.15137	7.13409	6.09505	6.51833	7.36977	5.30615	7.40133	6.80911	5.61332	7.70975	5.40908	6.26559	7.20787	5.25561	6.44153	7.18034	6.93214	7.08065	7.31256	7.33266	5.76663	5.60598	5.34861	6.78619
ENSG00000072274	TFRC	protein_coding	9.04864	7.11277	6.7706	7.82073	6.12741	7.50641	6.87027	5.1015	7.42814	8.79385	7.91393	8.44688	9.29665	9.15961	6.36769	7.24401	4.84534	8.93795	6.61261	7.05591	7.1822	7.12533	5.73012	8.27125	9.20756	7.30145	7.3404	7.60932	7.04638	7.31348	6.0971	7.91601	6.11895	4.75725	7.71223
ENSG00000072310	SREBF1	protein_coding	5.76735	7.58434	5.02361	5.02516	4.95632	6.20882	5.58711	5.45334	6.23132	5.21351	5.30245	7.0868	6.37146	5.7249	6.71356	6.25879	5.30266	6.49908	6.4087	5.80833	7.04455	5.73613	5.08524	5.78124	5.49941	6.12797	6.96029	5.07951	6.51314	6.94912	6.65065	5.84704	5.43579	5.13887	5.3936
ENSG00000072364	AFF4	protein_coding	8.06896	6.89984	7.53701	7.20514	7.72368	6.94641	7.02739	6.79351	6.64828	7.7892	7.28997	7.67414	8.54462	8.4306	7.12061	7.07716	6.79087	8.67183	6.92939	7.74924	7.57693	7.18582	6.59741	8.64824	6.3383	7.41198	7.24724	7.71243	7.09518	7.5904	6.95786	6.397	6.82218	5.70576	7.01719
ENSG00000072401	UBE2D1	protein_coding	4.95863	4.24285	4.69727	4.20964	4.58502	5.16632	4.8004	4.4753	3.81861	5.00698	3.62395	4.60829	6.25713	5.52597	4.33248	4.76522	3.99554	5.9892	4.37855	4.82926	4.90144	4.93357	3.6639	5.98267	4.11756	5.00625	3.56042	4.79584	4.79616	4.60668	4.48975	3.38993	3.33962	3.11554	3.67185
ENSG00000072415	MPP5	protein_coding	5.04905	4.88355	4.65871	5.83762	5.18487	4.53967	5.44877	4.72158	4.08552	5.166	4.91127	5.19346	5.03232	4.88648	5.30679	5.11972	4.10393	5.1323	4.85126	4.41983	5.86905	4.4519	4.70612	5.77803	4.60496	4.91668	4.7895	5.21691	5.37657	4.68917	5.15102	4.82688	4.78248	3.96635	4.39562
ENSG00000072422	RHOBTB1	protein_coding	4.52671	4.9667	3.51152	3.94021	3.95422	5.26475	5.03068	4.73825	5.04843	4.19923	4.62493	4.50826	4.55041	4.06476	4.65557	4.97475	4.46868	3.8115	4.96024	3.8612	4.2789	4.22146	4.29533	4.13565	3.61847	5.11242	4.24583	4.4049	4.52189	3.95947	4.46509	4.32672	3.42875	4.17128	3.71437
ENSG00000072501	SMC1A	protein_coding	6.35638	6.3599	6.41292	6.94117	5.95072	6.20188	6.31141	6.03709	5.88441	6.44028	6.16872	6.44976	6.94525	6.71731	6.24495	6.12645	6.04482	7.27622	6.25545	6.25856	6.53376	6.09352	6.27936	6.92444	6.73501	6.23692	6.45073	6.31896	6.56648	6.48815	6.15695	6.60872	5.69071	5.02492	6.42541
ENSG00000072506	HSD17B10	protein_coding	4.77348	5.46438	5.0058	6.41628	4.45426	4.2989	5.03068	4.31782	5.78437	4.61172	4.54622	5.02039	5.29493	4.88821	4.6232	4.873	4.86601	6.18271	4.94091	4.69852	5.40624	4.36016	5.21604	5.27644	5.84376	4.62243	4.81152	4.35258	5.14775	5.74099	4.77857	5.48286	5.04086	6.52573	6.01238
ENSG00000072518	MARK2	protein_coding	5.03234	5.77955	4.95101	5.25836	5.43075	5.02293	4.74892	5.02994	4.73089	5.22173	4.9233	5.06602	5.72179	5.47049	4.82527	4.76352	4.6354	5.681	4.89879	5.15521	4.85936	4.95503	4.86187	5.49136	6.79335	4.96283	4.90388	4.912	4.82018	5.27812	4.77085	5.58017	5.73391	5.096	4.86596
ENSG00000072571	HMMR	protein_coding	0.181163	2.62496	1.96613	5.12423	0.573909	0.894496	0.797054	1.98885	-0.798526	-0.852918	-0.538141	0.0933421	-0.685024	2.70404	0.318796	-0.39226	-0.022958	0.127236	0.0745932	0.543492	-1.5345	1.29281	2.02411	-0.952914	5.0671	0.886772	-2.68521	0.455129	-0.344431	-2.12365	-0.338095	3.35168	4.80041	0.594185	-1.18471
ENSG00000072609	CHFR	protein_coding	4.1237	4.75013	4.27484	3.8196	4.31987	4.43533	4.05596	3.97976	4.28968	4.27757	4.40752	4.1127	5.09548	4.615	3.76041	4.0627	4.36971	5.2773	4.2917	4.42597	3.85821	4.16938	4.22308	5.0143	3.47498	4.2719	3.82541	4.10282	3.89985	4.66025	3.93458	3.82639	4.43058	4.02752	4.35972
ENSG00000072657	TRHDE	protein_coding	3.95007	2.66976	2.9067	0.367372	2.79112	0.434955	4.23265	2.93538	2.47623	3.53826	2.81512	4.48382	4.07403	2.4561	4.01452	3.78348	0.152973	5.52785	3.9228	3.35686	4.99697	0.99432	1.30386	4.12307	-1.54631	3.48972	3.60237	4.58131	3.97934	3.99696	4.44776	3.78032	0.980229	-1.06518	3.86213
ENSG00000072682	P4HA2	protein_coding	5.92552	6.9176	4.78192	5.31389	5.23453	5.05409	5.20077	5.35946	5.94207	5.79771	5.78489	4.69796	5.34776	4.97703	5.48701	5.1237	5.14114	4.1838	4.43306	5.01708	4.61629	4.83415	4.33982	4.97983	5.99576	5.87467	5.56212	5.24464	5.13464	4.83606	5.08034	5.1779	4.6128	6.11771	4.75543
ENSG00000072694	FCGR2B	protein_coding	4.40683	5.81588	4.2812	5.54222	4.51621	7.73634	5.32461	4.63964	5.80524	6.91701	6.20218	3.65619	4.69545	6.06019	4.10912	4.65057	4.93386	4.08907	4.88806	5.00893	4.44529	6.8105	4.37956	3.76333	4.37781	5.29433	5.64195	4.91514	5.06096	4.39593	4.69293	4.23905	3.49904	5.50428	4.83876
ENSG00000072736	NFATC3	protein_coding	5.64671	6.12429	5.40083	5.19285	5.52986	6.24544	5.93033	5.87188	6.28005	6.04172	6.01196	6.00588	5.58799	5.12518	6.10299	6.28386	5.60655	6.71064	5.99431	5.3951	6.45991	5.52281	5.14663	5.96163	6.33577	5.98139	5.9187	5.91843	5.9813	5.58967	6.0847	4.92215	5.1911	5.7981	6.06554
ENSG00000072756	TRNT1	protein_coding	3.60423	3.29672	3.79836	4.35907	3.37199	3.60323	3.44147	3.68521	3.35188	3.75395	3.18646	3.36154	4.92942	4.12174	3.79957	3.7496	3.11152	5.21962	3.76176	3.65379	3.9679	3.16389	3.86235	5.23612	3.66759	3.69021	3.6476	3.20846	3.95784	4.36997	3.65487	3.71778	4.05468	3.43659	3.9813
ENSG00000072778	ACADVL	protein_coding	8.23192	9.13745	8.72844	6.55422	7.24871	7.25426	8.04318	7.72121	8.76355	7.88011	8.09686	8.38327	8.46316	8.21498	7.96468	8.24798	7.57345	9.30647	8.33801	7.60009	8.88374	7.00619	8.44985	8.82058	7.01674	7.94582	8.10593	8.46253	8.43873	8.85119	8.40051	7.0878	7.50708	7.51691	9.13109
ENSG00000072786	STK10	protein_coding	5.36411	5.78057	4.7684	4.60224	4.86404	6.46877	5.12203	5.67521	5.78287	5.3523	5.29414	5.49532	6.28554	6.03855	4.6609	4.97182	5.61503	5.89065	5.55153	5.42092	4.92106	5.7313	4.35377	6.18806	4.91267	5.72677	4.95245	5.18214	5.1956	5.66343	5.07157	4.83817	4.38081	5.2664	4.68998
ENSG00000072803	FBXW11	protein_coding	6.22007	5.8484	5.89677	6.38856	5.95617	5.78871	6.20022	5.82517	5.64582	6.42374	5.98982	6.12132	6.66123	6.50378	6.08279	6.04778	5.80816	6.6508	6.11592	6.20367	6.19008	5.84995	5.49468	6.5147	5.88311	6.07458	5.98319	6.26399	6.34535	6.02055	6.06084	6.39934	5.6499	4.99606	6.15919
ENSG00000072818	ACAP1	protein_coding	4.1493	2.69599	2.6752	2.77718	3.30906	4.28957	1.73324	4.87018	2.90964	2.3937	2.093	3.1963	2.97955	3.08196	2.3615	2.61623	5.32695	3.971	3.23173	3.92324	2.68746	4.59847	3.00041	3.56926	2.05054	3.45596	2.03585	2.9876	2.44683	3.59393	3.04111	2.04935	3.5791	4.07797	2.67849
ENSG00000072832	CRMP1	protein_coding	2.80619	3.47392	-0.222682	2.15118	3.38641	2.03216	1.54989	2.88136	0.57777	2.01905	2.52427	1.07701	2.88372	2.78053	1.93886	2.44897	0.933302	0.912618	0.606523	2.37783	0.796068	-0.282875	4.06884	0.636244	1.80337	2.3861	0.648214	1.27537	1.22203	0.402539	1.2287	3.72902	1.38843	4.34841	1.73362
ENSG00000072840	EVC	protein_coding	5.44558	6.31194	4.75628	4.44476	5.58325	5.82595	5.19236	5.32031	4.76476	5.57832	5.91348	5.37481	5.21624	5.04837	5.51889	5.36209	6.06628	4.54103	4.77035	5.32569	5.21924	5.33555	5.39112	5.39942	4.80701	5.66735	5.96767	5.61087	5.13105	4.82394	5.29683	5.19555	4.58592	5.21473	5.44229
ENSG00000072849	DERL2	protein_coding	5.25698	4.99162	4.86047	4.8698	5.1766	5.2986	5.33665	5.1809	5.61914	5.2898	4.66846	5.234	5.52055	5.55021	5.19099	5.14861	5.35422	6.18392	5.22388	5.19647	5.70334	5.03108	5.85245	5.4015	4.91402	5.29327	4.60003	5.20926	5.38061	5.44907	5.06527	4.28419	4.54132	4.90118	5.18811
ENSG00000072858	SIDT1	protein_coding	3.39188	2.93498	1.86814	1.74779	2.69594	3.16729	2.66597	3.33674	3.44599	3.23125	3.15824	2.76603	2.00046	3.93691	2.78385	2.79959	3.07374	1.24414	3.4259	3.04233	2.65033	3.32637	1.97983	1.79787	-0.0494523	3.70626	2.31911	3.84078	2.52198	1.87863	2.77706	0.58393	2.44233	1.99717	1.27931
ENSG00000072864	NDE1	protein_coding	4.1493	4.50514	3.99173	3.97452	3.95905	4.06977	3.56568	4.00754	3.57656	3.78758	4.24067	3.81427	3.83875	3.93021	3.64422	3.84574	3.82736	3.25427	3.77346	3.54149	3.94125	3.41849	4.53762	4.11547	4.57951	4.08081	3.30495	3.75924	3.14781	3.44813	3.0866	4.10462	3.8112	3.49551	3.95115
ENSG00000072952	MRVI1	protein_coding	5.4627	5.22568	6.57008	4.65113	5.69823	5.76873	5.42232	5.74425	5.1498	4.68294	5.84684	5.57428	5.75828	5.66159	5.73755	5.58499	6.53545	4.69456	5.09924	5.55853	4.40685	5.23584	5.48995	4.45561	4.03011	5.86756	5.71707	4.76658	5.04958	6.04238	4.48409	5.1621	4.38824	6.39587	6.62841
ENSG00000072954	TMEM38A	protein_coding	0.725929	1.47661	1.07811	3.4519	1.80332	0.65998	1.25007	1.2994	2.41549	1.2148	0.845779	1.55773	1.27755	0.631305	1.59378	1.61502	0.98073	2.7144	1.36295	0.602466	1.99522	0.543916	1.68108	1.09367	2.19157	0.559403	1.67433	0.995783	1.46991	1.69308	1.07671	3.81589	1.9181	2.4444	2.82979
ENSG00000072958	AP1M1	protein_coding	5.29952	6.30982	5.09513	4.70252	5.09555	5.41634	5.40787	5.12282	6.46093	5.45469	5.58813	5.6371	6.08109	5.48313	5.40923	5.51714	5.25764	6.26712	5.84287	5.21312	5.92161	4.88472	5.0439	6.00684	5.03252	5.41054	5.78493	5.41182	5.55535	6.41212	5.53784	4.71738	4.95444	6.28869	6.07838
ENSG00000073008	PVR	protein_coding	5.15395	4.95226	5.1506	3.36837	4.0479	3.39647	4.17043	3.0688	5.19341	4.65891	4.5709	4.67851	6.93	5.78648	3.83534	4.31982	3.45582	6.94293	4.39569	4.24347	5.0208	3.08823	3.68888	6.66285	4.65778	4.21247	4.50123	4.11926	4.45059	5.99529	3.49164	4.88914	4.33235	3.41495	4.95728
ENSG00000073009	IKBKG	protein_coding	4.15773	4.87209	3.8648	2.88691	3.75474	4.19688	3.80501	3.93707	4.95015	4.15411	4.08873	4.32775	4.49744	4.35474	3.83534	4.23665	4.25383	5.20543	4.07477	4.17469	4.62589	4.00995	3.46621	4.64526	4.773	4.17837	3.77331	4.14623	4.19905	4.70247	4.06906	4.16239	3.63261	4.68676	4.64203
ENSG00000073050	XRCC1	protein_coding	4.00408	4.94316	4.47489	3.9027	4.05016	4.12323	4.12825	4.06374	4.42679	3.96133	4.66274	3.846	3.21652	3.5911	4.01452	3.92377	4.25865	3.7863	3.85833	3.65727	4.02341	3.94947	4.38806	3.38767	4.75947	3.79896	4.40179	3.9912	3.87427	4.06622	3.81956	5.03357	5.73508	4.87447	4.70361
ENSG00000073060	SCARB1	protein_coding	5.86672	6.59991	5.95296	5.37167	5.04192	6.35048	5.49149	4.95822	8.32381	6.3017	6.213	6.1456	5.55725	6.96398	5.83206	6.11518	4.48932	6.04605	6.42734	5.08457	6.07484	5.62228	4.81978	5.90102	4.71186	5.92833	5.75166	6.39741	6.05969	6.65919	5.74034	4.21528	4.2838	5.48572	6.2284
ENSG00000073111	MCM2	protein_coding	2.76262	4.43159	4.10121	5.66982	4.90592	3.56356	3.10009	4.09428	2.9423	2.64265	2.88567	2.88621	2.07948	3.10594	2.80805	2.09683	3.56098	2.54442	2.40773	3.037	2.2018	3.98003	6.26004	1.91925	6.92477	2.94685	3.08587	2.6905	2.7454	2.44688	2.66159	6.10055	6.30663	5.15854	2.82425
ENSG00000073146	MOV10L1	protein_coding	-0.111336	-0.0681487	-1.31881	-1.83443	-0.00776592	-0.63949	-0.515053	-0.417238	-0.420844	-0.524794	-0.486302	0.139599	-0.821957	-0.674678	0.0204116	-0.454084	-0.335072	0.127236	0.285435	-0.520094	-0.00019584	-0.753893	-1.49859	-0.952914	-0.49195	0.209184	-0.264747	0.309983	0.514999	-0.132586	0.550706	-0.986953	-1.39075	-0.442535	0.449445
ENSG00000073150	PANX2	protein_coding	0.923499	1.89411	-0.374353	-0.796122	0.889467	-0.42787	1.79799	0.982329	1.30305	1.14734	1.29414	0.635509	1.13684	1.0574	0.675228	1.64482	1.19697	-0.236091	0.0745932	0.766171	0.166862	0.327012	-0.328127	1.45658	4.90995	0.614859	-0.199218	1.31395	-0.0550831	-0.0284575	0.398724	3.10667	2.01339	1.72905	0.735499
ENSG00000073169		protein_coding	3.65277	4.47263	3.05263	2.79264	3.45983	3.37899	3.33204	3.23858	4.59371	3.42887	3.63277	3.76717	4.30121	3.62469	3.51195	3.94787	3.78457	4.49121	3.63278	3.40734	4.08035	2.92868	2.58151	4.19455	4.11284	3.27414	3.6476	3.68392	3.76714	4.17927	3.71725	3.43408	3.6401	4.29254	4.58098
ENSG00000073282	TP63	protein_coding	-0.00710671	-0.927467	-0.48512	-0.23997	1.53223	-0.0797903	0.797054	0.472813	-1.31156	-0.257645	-0.0130478	-0.475468	-1.14232	-0.252647	-0.929983	-1.07618	-0.335072	-0.875415	-0.526954	-0.722358	-1.22758	1.15127	0.0600453	-0.394505	-0.812832	-1.11081	-0.561425	-1.04328	-0.398845	-1.59129	-0.770927	0.00249998	-0.798574	-0.0566025	-1.37532
ENSG00000073331	ALPK1	protein_coding	4.0103	3.96582	3.84204	3.63175	3.62091	4.25933	4.77005	3.90297	4.11447	4.13682	4.04756	4.36959	4.41984	4.74476	4.21429	4.10619	3.85308	5.11722	4.0842	4.0793	4.37021	4.09402	3.62417	4.5601	4.37781	4.2436	4.22509	4.21665	4.79616	4.4822	4.17111	4.03239	3.74564	4.30436	4.60054
ENSG00000073350	LLGL2	protein_coding	3.01864	2.89025	3.91474	3.90032	3.88737	2.42848	2.66597	2.94977	3.60403	2.60123	3.19839	3.05259	2.47981	2.80271	2.48675	2.67517	2.77061	2.646	2.84488	3.70851	2.8681	3.79147	4.55131	2.39156	5.86568	2.45609	2.92986	1.8354	2.36755	2.81201	2.40655	6.77175	5.80167	5.77705	2.57024
ENSG00000073417	PDE8A	protein_coding	5.28932	5.24061	5.07453	4.05793	4.66554	5.22618	5.11569	4.53855	5.53955	5.17026	5.3558	5.80974	6.45163	5.6626	5.35359	5.61447	4.64647	7.00022	5.34058	5.33768	5.92453	4.63585	3.55038	6.00957	2.68701	5.38684	5.00466	5.48971	5.15604	5.91268	5.42137	3.9371	3.42298	2.95086	5.27284
ENSG00000073464	CLCN4	protein_coding	2.876	2.62496	2.23431	3.29787	3.24325	3.48733	2.19415	3.14581	3.27704	2.71434	2.54311	3.14052	3.28481	1.85073	2.44414	2.858	3.0792	3.74764	3.26527	2.75452	3.56094	2.54434	4.15301	2.94848	2.1368	3.01027	3.05263	3.21357	3.34696	3.42539	3.17815	3.21984	2.95964	3.24384	2.36446
ENSG00000073536	NLE1	protein_coding	3	3.95861	3.05263	3.04591	3.0843	3.12599	3.8113	3.24637	3.95289	3.34603	3.67037	3.0825	4.67014	3.3713	3.33335	3.26532	3.56098	4.61448	3.03188	3.33529	3.90625	3.022	3.24456	4.60963	3.61847	2.97362	3.79155	3.33109	3.40767	4.5084	3.58263	3.70456	3.88025	3.87102	4.1097
ENSG00000073578	SDHA	protein_coding	6.55301	7.18901	6.209	6.85663	6.0844	6.28819	6.52777	6.31463	6.57119	6.27561	6.37286	7.18277	6.58541	6.22596	6.51613	6.52775	6.10959	7.58428	6.565	6.28299	6.96835	5.94237	6.32034	6.61064	6.81095	6.35664	6.68352	6.67813	6.89946	7.13789	7.23365	6.26009	7.50929	6.33725	7.8984
ENSG00000073584	SMARCE1	protein_coding	6.44173	6.63309	6.37031	5.83638	6.38873	6.35719	6.70537	6.35798	6.6606	6.60021	6.86275	6.63826	6.99514	6.66328	6.46338	6.77008	6.40517	6.82875	6.65316	6.31915	6.6814	6.12699	6.0661	6.48748	6.90817	6.5126	6.77527	6.73522	6.51452	6.86247	6.31073	6.16953	6.34568	6.04631	7.00654
ENSG00000073605	GSDMB	protein_coding	2.21296	3.54298	2.47523	2.12699	2.29101	1.91095	2.7271	2.91108	3.99502	2.05631	2.83563	2.87941	1.55147	2.06161	3.68922	2.72484	2.77061	3.83012	2.8993	3.16478	4.09769	1.95406	2.08392	2.54278	1.93759	2.46366	2.55102	2.63825	2.53655	4.43516	5.12583	2.398	3.07826	2.57503	3.24874
ENSG00000073614	KDM5A	protein_coding	6.04323	5.73386	6.05298	5.73997	6.41797	6.16463	6.11638	6.23805	5.46095	5.84904	5.83606	6.13637	5.99835	6.06172	6.04307	5.99886	5.99805	6.77771	6.04708	6.13978	6.22522	6.16482	6.68139	6.35119	6.10083	6.1214	5.9279	6.47819	6.04829	5.50545	6.05195	6.35682	6.20052	5.10143	6.11113
ENSG00000073670	ADAM11	protein_coding	0.632205	1.35018	0.295791	0.0954278	0.414218	0.0671067	-0.515053	0.146228	-0.121803	-0.0323198	0.674167	0.350952	-0.685024	-0.5952	0.496122	0.195942	1.21691	-1.046	-1.57788	0.127785	0.113297	-0.075298	2.19657	0.0921438	0.354184	0.0167229	0.308552	0.707816	-1.09872	0.70404	0.461451	-0.0998096	-0.226866	0.821747	-0.0227058
ENSG00000073711	PPP2R3A	protein_coding	3.90068	4.14469	3.77452	4.72418	4.7682	3.55113	4.18745	3.9914	3.0561	4.01594	3.96618	3.99497	5.10259	3.5783	4.08753	4.31982	3.7576	4.86675	3.84175	4.20117	4.43714	3.64661	4.22688	4.81598	3.68041	4.34342	4.11185	3.97924	3.982	3.66941	4.0816	4.72582	4.81481	3.36616	3.82935
ENSG00000073712	FERMT2	protein_coding	8.19518	7.68544	7.76681	5.837	7.63967	6.33471	7.61191	7.03785	8.02188	7.74638	7.74428	8.69053	9.22744	7.91865	7.52464	8.05134	6.7197	9.51334	7.86434	7.91926	8.83713	6.79008	6.27844	8.92618	5.14201	7.69192	7.80551	8.23186	8.03712	8.83759	8.18945	5.39271	5.24854	6.25924	8.02412
ENSG00000073734	ABCB11	protein_coding	0.347676	-1.1586	-0.129758	-2.91423	-0.0852212	-0.159257	2.47325	0.76087	-4.08843	-1.15966	-1.28099	0.311086	0.312117	-0.252647	1.29813	0.113099	-0.984095	-0.875415	0.111943	0.205928	-0.863067	-1.79719	-4.08843	0.518229	-3.52046	-0.357236	-1.98751	0.522569	0.292687	0.203076	-1.50756	-3.18157	-2.7878	-3.4576	1.53109
ENSG00000073737	DHRS9	protein_coding	0.136348	2.89025	1.48307	1.96354	-0.664995	5.96009	1.44057	1.77925	2.04637	0.976442	1.10431	1.96982	2.55087	1.97312	-0.0826266	1.94942	2.29552	1.60286	0.21852	0.602466	-0.406665	3.53389	0.126556	2.69333	-1.80761	3.09559	0.593794	2.21761	0.359776	1.18755	1.75223	1.89164	-0.340125	1.21141	0.36047
ENSG00000073756	PTGS2	protein_coding	6.84656	7.49907	6.45806	3.21613	5.31869	3.24651	6.19	3.60869	4.24674	6.69284	5.95743	7.46696	7.41494	8.49345	6.66502	7.61246	3.09006	6.47069	4.16638	5.17356	6.98055	3.24354	1.26009	6.35926	1.18324	6.48729	3.51964	7.52602	6.04956	6.40516	5.33188	1.11607	2.02106	3.53216	3.10094
ENSG00000073792	IGF2BP2	protein_coding	4.10638	3.46378	4.08676	4.5622	5.34569	2.96667	3.97426	3.50857	3.82446	4.60963	3.69303	3.17425	5.41596	4.25103	3.56689	3.2891	3.23401	5.37774	3.85833	4.50923	3.51003	3.28931	5.79226	5.69292	6.6278	3.3332	3.58387	3.5408	3.70399	4.5405	3.56845	5.81048	6.11492	5.1494	4.53936
ENSG00000073803	MAP3K13	protein_coding	4.90954	3.98722	4.37338	4.65818	4.81958	4.00062	4.53386	4.10504	4.8533	4.2802	4.22326	4.23758	4.5948	5.04528	4.09345	4.38967	4.43927	5.0943	4.45139	4.59341	4.74514	4.54602	4.65915	4.58966	6.5622	4.60883	4.37917	4.53715	4.39969	4.69678	4.25096	5.22098	5.74321	4.24427	4.22129
ENSG00000073849	ST6GAL1	protein_coding	6.52122	5.81787	6.41389	6.75274	7.20082	6.40632	6.9318	6.82182	6.3354	6.78127	6.69712	5.9032	5.59136	6.62956	6.04714	6.01749	6.90667	5.68952	6.35519	6.59622	5.23029	6.53303	7.02871	4.78597	8.52856	6.66241	6.44466	6.46272	6.30815	5.97508	5.88965	7.3743	6.15248	6.77543	6.34024
ENSG00000073861	TBX21	protein_coding	2.11242	1.08498	-0.806154	0.394652	0.548491	2.55835	-0.646742	1.97953	1.08637	1.51163	1.18646	0.698669	0.939137	0.695928	-0.232564	-0.332977	2.64376	1.00291	0.974153	1.08844	-1.5345	2.94783	0.280539	1.51937	-0.812832	1.11547	-0.136536	0.522569	0.485262	1.95682	0.714183	-1.08849	0.6651	-1.16594	0.164146
ENSG00000073910	FRY	protein_coding	6.56045	5.28736	6.13719	4.52256	5.37941	4.92759	5.65597	4.94151	6.30328	5.91814	6.53411	5.73827	6.32052	6.15231	6.07384	6.01607	6.08877	5.1911	5.9232	5.52748	5.6828	4.97384	3.98393	5.56947	2.23567	5.83217	6.20363	6.34539	5.68691	6.10167	5.60276	3.52928	3.71052	4.12404	5.89584
ENSG00000073921	PICALM	protein_coding	8.77389	7.59454	8.33493	7.31943	8.52184	7.94977	7.73338	7.27939	8.24446	8.25238	8.06015	8.37044	9.81407	8.91052	7.83271	8.21748	7.94195	9.98924	8.45435	8.51967	8.69024	8.11566	6.74463	9.56704	7.48687	8.29098	7.96286	8.73751	8.08902	9.12196	7.79445	6.84048	6.38334	7.18196	8.40823
ENSG00000073969	NSF	protein_coding	4.6926	5.30877	5.17244	5.14043	5.11408	5.06834	4.95746	5.00145	5.07076	5.11099	5.05487	5.26823	5.7032	5.74604	4.92049	4.96297	4.83892	5.63056	5.18717	5.00484	4.91716	5.05667	4.84098	5.10024	5.50482	5.64088	4.97658	4.9523	5.33966	5.56596	4.57555	5.0833	5.7536	4.67042	5.20525
ENSG00000074047	GLI2	protein_coding	2.22371	4.22795	1.95557	2.54124	1.89693	3.45768	3.24647	2.51922	2.69644	2.66694	3.30153	2.56884	2.11743	2.3696	3.30981	2.96817	3.89391	-0.343268	1.28333	2.92015	2.2018	2.55062	3.28516	0.455392	3.39556	3.48229	3.64537	1.88749	3.11906	1.83788	2.66825	1.78084	1.52407	2.72327	1.89015
ENSG00000074054	CLASP1	protein_coding	6.2624	5.96444	6.28744	5.39127	6.02113	5.60627	5.93393	5.82387	5.98842	6.10606	6.12356	6.24151	6.01227	6.1393	6.2095	6.12314	5.59039	7.03408	6.24813	5.57519	6.34043	5.87768	5.61828	6.05067	5.04991	6.03001	6.04998	6.86593	6.04956	5.96802	6.02105	5.61035	6.31211	5.07683	6.64263
ENSG00000074071	MRPS34	protein_coding	4.08884	5.31724	3.75638	4.20001	3.8146	4.29517	4.27193	4.03928	5.15909	4.0502	4.03431	4.32775	4.0932	3.75172	4.29701	4.3336	4.38962	4.8906	4.21224	4.03717	4.86139	3.76201	4.50049	4.095	5.89897	4.11005	4.2236	3.83747	4.39969	4.68535	4.20358	4.67056	5.15062	6.05613	4.64203
ENSG00000074181	NOTCH3	protein_coding	7.60515	8.38974	7.8517	6.99284	7.22884	7.66568	7.42366	7.2101	8.15817	7.23736	8.2224	7.89815	8.09122	8.12819	8.13664	8.07906	8.6591	7.13985	8.03371	8.12904	7.26858	6.4274	7.62976	6.60024	7.42702	7.87359	8.19954	7.60033	7.49926	7.48603	7.05227	8.18284	7.51897	6.48113	7.04897
ENSG00000074201	CLNS1A	protein_coding	5.97964	5.38733	6.10827	6.04607	5.72684	5.62492	5.8982	5.74494	6.24884	5.84372	5.68669	5.5283	5.70164	5.69656	5.64384	5.41816	5.49969	5.73798	5.47027	5.89713	5.89408	5.38557	5.60595	5.6541	7.13032	5.57425	5.5395	5.76937	5.81346	5.82505	5.58965	5.87554	6.41095	7.01687	6.03651
ENSG00000074211	PPP2R2C	protein_coding	-0.410541	-0.553328	0.454272	-1.06674	-2.21921	-0.42787	1.88402	-0.368821	0.269978	2.03158	2.84578	1.29705	-0.338326	1.42457	0.796327	-0.39226	0.669506	0.417224	-0.218041	-1.04549	-0.487119	-0.635138	2.67336	0.941497	5.53602	-0.71926	2.39533	-1.49813	1.75799	0.203076	0.550706	2.51513	-2.4126	-4.08843	0.735499
ENSG00000074219	TEAD2	protein_coding	5.05358	5.87352	5.69166	4.18642	5.22954	4.35181	5.25136	4.59609	6.28854	5.14742	5.27737	5.36389	5.19421	5.71811	5.11153	5.24295	4.92631	6.23371	5.2875	4.76617	5.13608	4.25645	5.75333	5.39733	6.74534	5.12082	5.06007	5.32829	5.24745	5.73823	4.98348	6.8084	6.08735	5.07821	5.32177
ENSG00000074266	EED	protein_coding	3.39664	3.50887	3.30233	4.3899	3.46323	4.1482	3.48539	4.08345	3.94217	3.48915	3.48153	4.04747	4.24661	3.48995	3.54401	3.84894	3.64434	4.32176	3.46251	3.8307	4.01248	3.70406	3.40389	4.44352	4.68348	3.63092	3.70649	3.76622	3.67135	4.30169	3.90667	4.01413	3.5739	4.1426	3.82103
ENSG00000074319	TSG101	protein_coding	5.25698	5.4231	5.11545	5.39465	5.23353	5.12918	5.33774	4.92825	6.23901	5.42769	5.59792	5.5075	5.67166	5.4877	5.10275	5.50906	5.0044	6.11726	5.31778	5.19288	5.72247	5.03445	5.42041	5.60156	6.01613	5.26538	5.57914	5.45345	5.47631	6.0137	5.37121	5.37196	5.50711	5.98375	5.99277
ENSG00000074356	C17orf85	protein_coding	5.12986	4.90056	4.97866	4.28811	5.0385	4.69602	5.01579	4.80176	4.42294	5.10211	4.99913	5.16019	5.71562	5.14702	4.93265	4.82338	4.72517	5.73304	4.83181	4.86733	5.19043	4.46691	5.76055	5.60247	3.85173	4.90282	4.73606	5.15451	4.85548	4.83778	4.87389	4.65886	4.25808	3.89935	5.00699
ENSG00000074370	ATP2A3	protein_coding	5.6387	5.20452	4.26846	4.28993	4.6492	5.28271	4.06388	5.95209	5.31687	4.52578	4.40752	5.29019	4.89706	5.12811	4.45251	5.18202	5.9196	4.75101	4.79496	5.57427	4.62349	5.45833	4.38297	4.47356	2.80879	5.09911	4.42924	4.54326	4.17829	4.64261	4.62947	3.55476	4.26455	4.6259	4.33074
ENSG00000074410	CA12	protein_coding	3.40138	6.48112	2.24302	3.09247	1.93665	2.94308	5.87137	2.64244	3.27704	4.69873	3.23746	3.78547	5.47926	8.2611	5.58971	4.96888	2.77061	4.36496	1.59168	3.75474	2.13617	1.43533	0.52204	3.48526	6.26092	4.3516	3.54377	4.5574	5.73587	3.65775	3.74588	3.0209	0.563793	2.79874	4.69454
ENSG00000074416	MGLL	protein_coding	7.92138	8.62806	7.34218	5.73397	6.63463	7.74335	7.69309	7.13785	9.08555	7.75373	8.20957	8.61733	8.0207	7.91293	7.90771	7.96558	6.58281	9.54268	8.39416	7.14415	8.63207	6.72357	5.28682	8.25937	4.77599	7.91509	8.79738	8.26946	8.58456	8.89147	8.52332	5.08476	5.10266	5.53771	8.12942
ENSG00000074527	NTN4	protein_coding	5.38101	4.91366	5.24581	4.97182	4.56772	4.97489	5.60622	5.08747	6.37781	5.30922	5.65818	5.7203	5.40257	5.85086	5.0701	5.46276	5.41698	4.7214	4.96024	4.80278	5.09694	4.81211	3.90324	4.3056	3.23969	4.98009	5.5395	4.78386	5.15249	5.54607	5.18627	4.08143	4.17807	3.32498	4.89792
ENSG00000074582	BCS1L	protein_coding	3.66071	4.26053	3.59217	3.78651	3.15758	3.23879	3.43334	3.43547	4.48706	3.27931	3.88731	3.52729	3.93751	3.22021	3.38254	3.13492	3.96639	3.83012	3.48047	2.91434	3.45727	3.22404	3.46942	3.62386	4.352	3.40574	3.70862	3.63142	3.61067	3.93069	3.58263	3.4295	4.3823	4.89494	4.10057
ENSG00000074590	NUAK1	protein_coding	5.00922	6.46405	4.94301	5.40559	6.01302	5.18454	5.77816	5.71366	5.53777	4.82285	6.09778	5.46044	5.40832	4.45383	6.04561	6.00964	5.64937	4.8906	6.58174	5.73774	5.02624	4.24488	5.51422	4.97143	5.12687	6.17946	5.12467	5.84541	5.66883	5.74099	5.6166	5.49443	3.52622	6.14229	5.81792
ENSG00000074603	DPP8	protein_coding	5.68708	5.08058	5.62238	5.56341	5.66239	5.80123	5.93393	5.55723	5.42674	5.86575	5.43859	5.98228	5.93867	6.01658	5.79439	6.06372	5.43837	6.05795	6.10901	5.68755	5.81345	5.59748	4.98013	6.0333	4.82155	5.9372	5.62566	6.08524	6.02652	5.40791	5.93387	5.01074	3.92792	4.33464	5.60203
ENSG00000074621	SLC24A1	protein_coding	3.61244	3.86538	3.72562	3.73675	3.75196	3.83364	4.22561	3.75787	3.42303	3.96786	4.05195	3.54458	3.70807	3.98942	3.76041	3.62059	3.68428	3.22643	3.9096	3.44005	3.81273	3.26661	3.07388	3.52787	4.05	3.79896	3.72137	3.92107	4.07228	3.53141	3.63119	3.47914	2.4018	3.66644	3.77587
ENSG00000074657	ZNF532	protein_coding	6.29526	6.44162	5.86608	5.23968	6.22088	6.16769	6.16075	6.32202	5.92719	6.22401	6.42709	6.19846	6.43294	6.14726	6.18476	6.20355	6.47721	6.09306	5.9786	6.10132	6.02131	5.90304	6.15093	5.91495	6.70434	6.38284	6.28459	6.34888	6.14418	5.8406	6.01322	6.45397	6.30113	5.52564	6.24039
ENSG00000074660	SCARF1	protein_coding	4.4871	5.15967	4.59887	3.2123	3.45983	4.25167	4.3539	4.30482	5.87739	4.33176	4.74772	5.17414	5.30112	5.52597	4.49487	4.92249	4.10125	4.56717	5.31978	4.30246	5.1807	3.45242	3.52903	5.94457	3.58476	4.85468	4.06428	4.7526	4.54909	5.16737	4.62263	2.40269	2.26003	2.85125	3.9047
ENSG00000074695	LMAN1	protein_coding	7.62049	7.01892	6.90775	6.87491	7.21401	6.95469	7.82051	7.10902	6.6149	7.62737	6.904	7.15524	7.51606	8.30335	7.54422	7.00755	6.75807	7.62483	6.95112	7.36858	7.16996	6.96859	6.98569	7.54851	7.69902	7.42392	6.90967	7.45659	7.75643	6.98921	7.06052	7.20526	6.96412	6.21735	6.98002
ENSG00000074696	PTPLAD1	protein_coding	5.7414	5.88021	5.9329	6.50383	5.84638	6.10477	5.96176	5.72904	5.98319	5.92403	5.85062	5.99334	6.04709	6.12617	5.99643	6.09778	5.56533	5.99333	5.87852	5.89123	6.27942	5.76206	5.81765	5.79953	7.00373	6.20113	6.00203	5.82552	6.40811	5.9891	5.87244	6.41131	5.32947	5.82543	5.69214
ENSG00000074706	IPCEF1	protein_coding	4.42091	0.656747	2.5261	1.34814	3.65108	3.14265	1.63742	3.44566	1.96394	2.31389	2.3711	2.26932	3.0597	3.20363	1.12396	0.671684	3.96933	3.69444	2.6428	4.36341	1.23273	4.85205	2.10881	3.33191	0.184551	3.55498	1.9518	2.4776	2.22188	2.95224	2.80151	0.812371	2.29206	2.00877	1.66096
ENSG00000074755	ZZEF1	protein_coding	5.71402	6.13311	5.64885	4.6638	5.24445	6.03563	6.00079	5.70803	5.49804	6.05559	6.19327	6.13565	6.07629	6.12983	5.96233	5.8581	5.91197	6.50971	5.93758	5.75165	5.9572	5.9578	5.75399	6.17593	4.27378	6.02809	6.16098	6.30107	6.03937	5.64584	6.05513	4.99376	5.20294	4.11064	6.23258
ENSG00000074800	ENO1	protein_coding	8.58149	9.10601	8.56246	10.2346	8.30086	8.31991	8.37569	7.82112	9.1004	8.46228	8.08873	8.59585	10.3852	9.36297	8.03263	8.25434	8.22202	10.4887	8.2783	8.84756	9.08367	8.08138	8.24887	10.0293	10.9249	8.25992	8.47241	8.06287	8.79036	9.73812	8.03384	9.16953	10.6669	10.3277	9.29911
ENSG00000074842	C19orf10	protein_coding	5.22255	6.12509	4.81005	4.77567	5.00852	5.43506	5.18875	4.9487	5.78737	5.11835	5.15518	5.01885	5.43486	5.67067	4.90037	5.097	5.68471	5.83796	5.01917	5.14036	5.4447	5.14955	5.07159	5.42322	5.53072	5.39874	4.94613	4.92452	5.57313	5.41946	4.75215	5.26924	5.56528	6.16191	5.38611
ENSG00000074855	ANO8	protein_coding	3.82151	4.51499	3.52588	2.78235	3.52969	2.57072	3.73067	3.13326	3.1523	3.58576	3.86503	3.86678	3.32591	4.02444	3.54977	3.49942	3.24862	3.23577	3.79945	3.46807	3.4944	2.94307	4.0646	3.19918	2.63527	3.61401	3.47266	3.76622	3.63118	3.51858	3.53239	4.20325	2.73574	3.38854	3.3562
ENSG00000074935	TUBE1	protein_coding	4.22883	3.80239	3.8449	2.29566	3.4734	3.17542	3.84846	3.54693	4.3996	3.97436	4.02318	4.01682	3.95857	4.43502	3.8377	4.08461	3.53738	5.04733	3.73507	3.23635	4.3179	3.12655	3.17947	4.09243	1.03138	3.99197	3.95159	4.38465	4.15959	4.14349	4.46317	3.14352	3.17762	2.86408	3.86482
ENSG00000074964	ARHGEF10L	protein_coding	4.15773	5.72114	4.39504	3.63175	4.27602	5.20452	4.77005	4.42469	4.66393	5.07966	5.39087	4.8005	4.80995	4.43028	4.6191	4.89486	5.21613	4.00963	4.52073	4.46025	4.66829	4.40762	3.85501	3.99361	4.58293	4.98536	5.38517	4.4937	4.86994	4.87182	4.6913	4.32918	4.05281	4.15048	4.94331
ENSG00000074966	TXK	protein_coding	2.01676	-0.638164	0.823085	1.51902	0.9294	1.14661	0.455516	1.48208	-0.214763	0.55849	-0.167771	-0.00387489	-0.444895	1.717	-0.118676	-0.586296	2.51276	0.542936	0.657935	1.66005	-0.406665	2.61194	1.10378	-0.230548	0.534483	0.501728	-0.783545	1.33286	0.0703882	-0.132586	0.634759	-0.938744	1.85088	-0.321348	-1.37532
ENSG00000075035	WSCD2	protein_coding	-0.972574	1.43568	0.454272	2.82809	-0.167072	0.262723	-0.130637	-0.946659	0.831303	-0.0323198	1.97776	2.85882	0.939137	-0.758791	0.177304	1.40472	-0.812573	-2.05199	-0.710374	-1.34645	1.37607	0.327012	1.62467	-0.791786	-0.381229	0.668263	1.64786	-0.776868	0.109899	2.0189	1.39861	1.49521	-1.75953	-0.380669	1.37327
ENSG00000075073	TACR2	protein_coding	-0.972574	-1.28972	-1.31881	-0.00794352	-1.43155	-0.529803	-0.717387	-1.0963	0.684587	-1.40767	-0.486302	0.18442	-0.821957	-1.04528	-0.444968	-1.07618	-0.588358	0.279504	-0.585541	-2.24593	-1.22758	-0.883307	-0.328127	0.00706981	-2.53764	-1.11081	-0.736301	-0.776868	0.148356	0.159647	-0.633468	0.854018	2.21396	0.431265	0.612452
ENSG00000075089	ACTR6	protein_coding	4.42091	3.30242	4.28964	4.44476	4.26436	4.20285	4.31902	4.30854	4.19347	4.24835	3.63862	4.34512	4.52593	4.21289	4.11689	4.3336	4.09588	4.91115	4.22295	3.98549	4.70497	4.10686	4.42321	4.38992	3.51131	4.2719	3.91691	4.4768	4.45443	4.21153	4.4263	3.59215	4.25321	3.55608	4.34627
ENSG00000075131	TIPIN	protein_coding	2.00434	1.23564	1.7262	2.37313	1.66824	1.96816	1.94247	1.96071	1.94257	1.95473	1.52638	2.36003	3.07906	2.43732	1.92122	2.03066	2.46352	2.74088	1.87847	2.25454	2.41603	1.60176	1.70304	2.66584	3.86583	2.26998	2.16589	2.06763	1.7202	3.13152	1.66163	2.23943	2.47618	2.83178	2.30211
ENSG00000075142	SRI	protein_coding	6.27344	6.06347	6.13427	5.88348	5.93548	6.0484	6.02804	5.78227	6.64249	6.1208	5.90015	6.17644	6.61804	6.47932	5.94169	6.19916	6.1735	6.78886	6.13305	6.20069	6.53313	6.02472	5.65536	6.48305	5.31643	6.23416	5.77375	6.27747	6.17186	6.44528	6.03272	5.50318	6.10819	6.40304	6.08823
ENSG00000075151	EIF4G3	protein_coding	6.65135	6.63422	6.0999	6.43857	6.17698	6.1508	6.33995	5.88005	5.73241	6.68641	6.55437	6.36347	6.81419	6.95163	6.14588	6.34923	5.83905	6.30311	6.53739	5.96962	6.38632	5.86765	5.92374	6.49433	5.59138	6.50574	6.30485	6.63498	6.64507	6.13359	6.01583	6.20248	5.9405	5.43608	6.02208
ENSG00000075188	NUP37	protein_coding	3.49754	3.60889	3.31064	4.4333	3.29766	3.3613	3.79235	3.34038	3.70899	3.50271	3.50733	3.28643	3.13563	3.5911	3.67876	3.56323	3.29157	3.36056	3.48403	2.76101	3.67162	3.17205	4.18262	2.86633	3.93968	3.48229	3.41367	3.63904	3.87427	3.32084	3.45357	3.54207	4.48146	4.0218	3.64699
ENSG00000075213	SEMA3A	protein_coding	5.01542	4.14469	4.55755	2.9844	4.40022	4.00062	5.61433	4.37758	3.14296	4.60963	4.64686	4.05654	5.14224	6.19206	4.92713	4.14058	3.77115	4.20297	4.67219	4.32453	4.11483	4.62994	4.20588	4.3645	3.97133	4.3081	3.93526	4.77179	5.40762	3.97207	4.55592	3.50769	5.10447	4.04735	3.78729
ENSG00000075218	GTSE1	protein_coding	-0.0582803	2.92762	0.846146	3.75001	-0.125566	-0.118977	-0.283037	0.963544	0.337014	-1.54974	-1.94151	-0.622126	-0.146242	2.02435	-0.399912	-0.221255	-0.733899	0.542936	-0.470654	0.0870661	-1.09558	-0.423459	2.67336	-0.952914	4.96469	0.410649	-1.78164	-0.186295	-1.01134	-1.45004	-0.186129	4.54055	4.15736	-0.156749	-1.59501
ENSG00000075223	SEMA3C	protein_coding	8.68199	7.88151	7.26994	6.13873	8.86421	8.52259	8.62781	7.71894	6.00268	8.52274	8.03306	7.77512	8.73094	8.3373	8.08928	8.26742	7.6224	7.64425	6.76106	7.91672	7.93438	7.85218	8.27979	8.27111	5.07683	8.38781	7.79764	7.99029	8.28594	6.76938	8.55422	6.31735	5.6853	6.98234	7.2294
ENSG00000075234	TTC38	protein_coding	3.55826	5.3116	3.94709	3.59695	4.2526	4.63991	4.73576	4.47861	4.8647	3.94155	4.29722	6.0512	4.51175	4.13053	4.74354	4.43087	4.17956	6.21848	5.06394	4.44623	5.49662	4.46026	4.68283	4.67487	4.25033	4.58993	4.59079	5.10449	4.79768	5.61502	4.82403	4.14012	3.65002	4.33464	6.62044
ENSG00000075239	ACAT1	protein_coding	6.2147	6.49177	5.58346	5.72392	5.47611	5.71751	6.51771	5.68743	7.41802	6.13029	6.39721	7.14536	6.32154	5.68267	6.28947	6.5975	5.27558	8.08407	6.62598	5.82776	7.60237	5.48233	4.84839	6.85044	4.76098	6.08074	6.75862	6.66187	6.94352	7.61824	7.12582	4.05041	5.11077	5.73225	7.5532
ENSG00000075240	GRAMD4	protein_coding	4.88266	6.10973	5.08548	4.53641	4.57088	5.2398	5.09007	4.50158	5.27688	5.00857	4.91127	5.5348	5.53465	6.05173	5.03566	5.00091	4.78149	5.69122	5.09224	5.12787	5.38944	4.85205	4.07937	4.96299	5.25668	5.19093	4.62398	5.11681	5.30497	5.39157	4.97275	5.14542	4.68333	4.15048	4.23178
ENSG00000075275	CELSR1	protein_coding	3.74521	3.43292	4.91874	5.11401	5.13665	4.59218	3.62041	3.55323	3.30242	3.78017	4.16366	3.32197	4.15836	4.33965	2.94096	3.26052	3.91848	1.91339	3.20606	4.13779	2.543	4.22931	4.66895	2.89621	7.09663	3.47106	3.93344	3.28813	3.67794	2.60903	3.08161	7.60155	6.85819	4.02752	3.44903
ENSG00000075292	ZNF638	protein_coding	6.28824	5.88971	6.11482	6.49559	6.27613	6.33199	6.30251	6.18835	5.89835	6.15555	6.55591	6.39301	6.35766	6.05635	6.38469	6.37224	6.03853	6.86306	6.1285	5.88381	6.51968	6.00085	6.27936	6.08351	6.4729	6.2197	6.51468	6.28538	6.2846	6.20409	6.39198	6.57773	6.73224	6.10426	6.51101
ENSG00000075303	SLC25A40	protein_coding	4.17998	3.34172	3.91746	4.33287	3.77131	4.4737	4.14577	3.98676	3.37599	4.00327	3.52322	3.75607	3.49399	4.33965	4.08951	3.75302	3.75419	3.80524	3.37688	3.8152	3.50484	4.41108	3.68337	3.46546	3.75504	4.18296	3.44475	4.1274	3.92499	3.35494	4.12826	3.36134	3.80011	2.90191	3.49155
ENSG00000075336	TIMM21	protein_coding	3.91733	3.92574	3.28556	3.65168	3.31284	3.88406	4.14825	3.54061	4.13345	3.84193	3.77231	3.82138	4.45731	3.63297	3.99146	3.81658	3.70914	5.08658	3.92542	3.52634	4.42345	3.42534	3.69711	4.1256	4.14326	3.88042	3.93709	3.94278	4.35105	4.42144	4.22634	3.74939	3.99366	3.5679	4.46128
ENSG00000075340	ADD2	protein_coding	3.94033	6.48426	4.02999	2.48524	4.15703	3.68514	5.81069	4.66457	2.9315	4.67896	3.97776	3.2605	4.17645	4.20181	4.96207	2.63861	3.24376	3.09917	3.30613	3.83992	2.96955	4.32397	4.18067	3.07405	5.43372	5.22363	3.24735	2.74799	3.43515	3.60206	3.21502	4.24689	3.21485	2.95686	2.8353
ENSG00000075391	RASAL2	protein_coding	6.36854	4.89491	6.30158	5.05752	6.22088	5.50197	5.2743	4.88274	5.2597	5.50047	5.76297	5.2591	7.07264	5.38242	5.81723	5.65255	5.54969	6.63853	6.03862	5.72949	4.95951	5.38381	5.3174	6.15754	4.0914	6.02041	5.42468	6.30047	5.076	5.18913	4.72365	5.16692	4.45766	3.88683	5.95845
ENSG00000075399	VPS9D1	protein_coding	3.35813	4.56803	2.73819	2.54124	2.90064	2.9191	3.40868	2.86627	3.83609	3.21486	3.22585	3.3761	3.59831	3.78923	3.17858	3.35368	3.53738	4.87574	3.33406	3.41559	3.41362	3.09254	2.24975	4.06375	3.18226	3.03589	3.06934	3.20846	3.48858	4.3889	3.41051	3.02394	3.45445	3.95139	3.79297
ENSG00000075407	ZNF37A	protein_coding	4.66723	4.24877	4.58351	4.74155	4.67291	4.63844	4.85619	4.75337	4.27693	4.81562	5.03837	4.76405	5.81567	5.24475	5.03259	4.68144	4.6391	5.77208	4.8554	4.55287	4.67293	4.5771	4.69109	5.70647	4.36794	4.75792	4.60118	4.88982	4.73272	4.64064	4.70433	4.07557	5.37952	3.88368	4.83602
ENSG00000075413	MARK3	protein_coding	6.32739	5.94725	5.77813	5.73464	5.73953	5.39128	5.53867	5.22888	6.05339	6.33745	6.48098	5.79717	6.57693	6.3225	5.70505	5.92869	5.56631	6.7833	5.60654	5.69942	5.92258	5.61406	6.72866	6.51277	4.95153	5.7525	5.97922	6.09358	5.70395	6.30595	5.64559	5.77839	5.4934	5.47111	6.39446
ENSG00000075415	SLC25A3	protein_coding	8.37427	8.48887	7.76757	8.91011	7.89575	7.81462	8.41647	7.74444	9.02188	8.21391	7.97082	8.33811	8.80711	8.41629	8.18562	8.29249	7.96074	9.57202	8.0693	8.17272	9.03048	7.7301	8.00234	8.91582	7.23043	8.03794	8.15511	8.40044	8.39691	9.08707	8.38163	7.96584	8.34976	8.41678	8.9656
ENSG00000075420	FNDC3B	protein_coding	7.71352	7.14168	7.36656	6.32971	7.95211	6.87061	6.84751	6.67149	6.47867	7.52117	6.83563	7.42	8.73228	7.34451	7.09058	7.30331	6.73015	9.08811	7.55971	7.52109	7.5105	6.60831	6.80489	8.74491	7.18617	7.47843	6.86058	8.21316	7.22736	7.19143	6.95139	6.89179	5.93493	5.42638	6.76504
ENSG00000075426	FOSL2	protein_coding	10.339	9.24185	9.63986	6.8319	9.10329	6.50346	8.57913	6.60903	9.87145	9.91751	9.51475	10.3093	10.2872	10.3611	8.06714	9.38029	7.92765	10.6818	8.41509	9.26602	10.1152	8.16789	7.3523	9.79375	7.60275	9.43334	9.17614	9.7004	8.9943	10.0227	7.77991	8.11844	7.67907	7.78055	8.95623
ENSG00000075461	CACNG4	protein_coding	1.27314	2.64305	2.63604	4.86372	1.81403	-0.42787	2.44926	0.0780028	1.89887	1.12413	2.53058	0.0933421	1.13684	1.2845	0.871757	0.311917	-0.394348	-0.722881	-0.218041	3.88218	0.113297	1.95406	2.9508	0.248576	5.52095	1.0765	2.59324	-0.357621	-0.0550831	0.61037	0.579271	4.92296	4.28857	3.63683	0.0922824
ENSG00000075539	FRYL	protein_coding	5.87441	5.30024	5.62155	5.08604	5.26898	5.64407	6.04414	5.84519	5.55547	5.87099	6.06775	6.1653	6.17967	6.30836	6.0189	5.92186	5.40073	6.16937	6.28334	5.4473	6.08182	5.6663	5.33684	5.7132	5.3154	6.13154	6.0159	6.44599	6.19501	5.55971	6.26035	5.32953	5.55277	4.0103	5.79122
ENSG00000075568	TMEM131	protein_coding	5.86328	5.83764	5.85901	5.43791	5.83591	5.75321	5.78696	5.78294	5.3436	5.82765	5.85377	5.7854	6.39096	6.09131	5.795	5.57921	5.50882	6.22084	5.4311	5.68243	5.80925	5.75732	5.76968	5.85688	5.025	6.03383	5.70856	6.0094	5.84746	5.70462	5.68309	5.55829	6.00472	4.81623	5.70726
ENSG00000075618	FSCN1	protein_coding	5.88037	7.83751	5.57399	6.30161	6.21585	6.14305	5.88857	6.57075	6.82506	6.32606	5.92609	5.58372	5.82859	6.31416	5.81305	6.16359	6.43793	4.17412	6.52099	5.82467	5.84152	5.67925	6.67966	4.86213	7.55328	6.91974	5.57564	5.6669	5.54007	5.37624	5.59316	6.85701	6.39666	7.47151	4.25048
ENSG00000075624	ACTB	protein_coding	11.6217	12.0347	11.6882	11.1547	11.51	11.7679	11.2658	11.0786	12.4811	11.6196	10.9849	11.9445	12.3898	11.9554	11.0181	11.664	11.8373	12.6042	11.1984	11.6822	11.9189	11.4652	11.3378	11.8863	11.981	11.7042	11.1758	11.4243	11.4946	12.3286	10.9872	11.2817	11.0308	12.5926	11.6336
ENSG00000075643	MOCOS	protein_coding	1.92751	2.28819	2.14415	2.31006	3.20309	1.96816	2.86646	1.54661	1.3686	1.83118	1.27924	1.76375	1.85081	2.21281	2.29455	1.67401	1.45383	5.1298	1.5784	2.52227	1.99522	2.40577	1.52955	1.96508	2.29523	2.08599	1.58415	2.79648	2.7454	3.80596	2.25544	1.51265	2.39001	1.25103	4.84834
ENSG00000075651	PLD1	protein_coding	5.29698	4.7543	4.18273	3.88116	4.36607	5.21637	4.90991	4.78715	5.06336	5.18154	5.49931	5.28634	4.02995	4.4585	5.09097	5.05601	4.5515	4.57086	4.83739	4.14028	4.87754	4.07455	3.64984	4.3255	2.99992	4.8747	5.55857	5.25335	5.01487	4.95515	5.60102	3.24615	3.01057	3.07196	4.63256
ENSG00000075702	WDR62	protein_coding	-0.0582803	1.81654	1.99737	3.29426	0.848398	0.200419	-0.283037	1.01918	1.40029	-0.453228	-0.209191	0.535261	0.312117	1.03259	0.543026	0.384358	1.41982	1.35114	0.632458	0.631073	0.862507	1.15127	2.53329	0.132871	3.52204	0.279512	0.395962	0.0144581	-0.0120354	0.11487	0.764803	3.60237	3.84182	1.99717	-0.489748
ENSG00000075711	DLG1	protein_coding	6.39315	5.70939	5.6988	6.00572	6.02286	5.46518	6.00285	5.70521	5.86324	6.23217	6.03265	6.35062	6.21072	5.9552	5.90737	6.10785	5.51185	6.79519	6.17722	5.62404	6.48121	5.57533	5.81135	6.40882	5.93285	5.91459	6.14845	6.21322	6.26996	6.1531	6.26091	6.47664	5.38991	4.43911	5.86383
ENSG00000075785	RAB7A	protein_coding	8.08139	8.03581	7.91407	7.51855	7.99332	8.09571	7.73214	7.45903	8.7351	8.13447	7.93725	7.94693	8.91777	8.21257	7.66841	8.05186	7.77333	8.86741	8.02792	7.93906	8.37279	7.64282	7.21505	8.88346	7.96248	7.93463	7.92433	8.12403	7.99834	8.49729	7.78796	7.9421	7.92766	7.89284	8.18013
ENSG00000075790	BCAP29	protein_coding	6.39909	4.71208	6.08059	5.30404	5.81741	5.73272	6.05478	5.40803	6.35676	6.34626	5.69162	6.30695	6.86178	6.41479	5.8916	6.33958	5.53587	7.12107	6.42919	5.9773	6.74277	5.68924	4.69521	6.55459	4.65616	6.38034	5.54549	6.36275	6.37251	6.14128	6.19437	3.9643	4.2838	4.35751	5.85232
ENSG00000075826	SEC31B	protein_coding	3.40611	4.02909	2.38363	2.58334	2.21227	2.73906	2.33172	3.33674	3.80091	2.46932	3.60316	2.946	2.25995	2.63979	3.12948	3.14016	3.18929	3.58907	3.58045	2.79932	3.19899	3.41849	2.30105	3.73385	-0.3289	2.99468	3.38458	3.25382	2.8541	3.95947	3.4651	1.87825	1.84225	2.55934	3.25698
ENSG00000075856	SART3	protein_coding	4.89952	5.13432	5.03243	5.29863	5.45403	5.1489	5.01579	5.21703	4.96612	4.85844	4.96113	5.18659	6.06541	5.35642	4.9545	4.67604	5.07166	6.1033	5.04354	5.13663	4.84505	4.99125	5.69631	5.88323	5.05115	4.80637	5.28497	4.94002	4.90966	5.58353	4.86666	5.33076	6.14636	5.44679	5.51108
ENSG00000075884	ARHGAP15	protein_coding	4.19372	2.78828	3.48238	2.77199	3.09312	4.52703	3.25572	4.19838	3.83609	3.20384	3.22196	3.42828	3.76894	3.89967	3.35323	3.64659	4.0099	3.7012	3.37304	3.91745	3.22448	4.49485	2.57557	3.63098	2.37627	4.34137	3.27644	3.65039	2.91113	3.7918	2.83151	1.62116	2.69319	3.84212	3.2446
[truncated: 17,364 more rows]

## Sheet: Table S5
Supplementary Table 5: Pairwise correlation matrix of leukocyte counts
N = 35
Pearson's correlation
[truncated: 8 more rows]

## Sheet:  Table S6
Supplementary Table 6: Correlation of IHC cell counts and disease score with immune cell gene signatures
[truncated: 64 more rows]

[truncated: 3 more sheets: Table S7,  Table S8, Table S9]
